# Supplementary material for: Selective and mechanistic pressures shaping cancer aneuploidies
Source: Research Square preprint supplement (doi:10.21203/rs.3.rs-550953/v1), 2021-05-26
Supplement: Supplementary file 1 [file 287aff133b38886cf3313ef0.xlsx]

## Sheet: Table S1a
Table S1a
List of aSCNAs sorted from most frequent to least frequent in pan-cancer. Recurrent mutations and focal SCNAs (in the same direction as the aSCNA) are reported if they occur at a frequency of >=20% of the aSCNA's frequency.
arm	direction	aSCNAs	frequency	mutations (at least 20% of aneuploidy frequency)	focal SCNAs (at least 20% of aneuploidy frequency)
20q	amp	3468	0.318985
7p	amp	3365	0.309511
8q	amp	3216	0.295806		8q24.21 amp, 0.067696836
1q	amp	3024	0.278146	SPTA1, 0.088115431
7q	amp	2963	0.272535	KMT2C, 0.081066197; BRAF, 0.071043066
20p	amp	2868	0.263797
17p	del	2671	0.245677	TP53, 0.37526159299999995
5p	amp	2624	0.241354
9p	del	2374	0.218359	PTPRD, 0.048573631	9p21.3 del, 0.151306107
22	del	2232	0.205298
13	del	2076	0.190949		13q14.2 del, 0.069904341
12p	amp	2069	0.190305	KRAS, 0.069501046
16q	del	2052	0.188742	ZFHX3, 0.044608437
18q	del	2008	0.184695
18p	del	1913	0.182671
3q	amp	1977	0.181843	PIK3CA, 0.117523956	3q26.2 amp, 0.060246505; 3q26.33 amp, 0.045437822
10q	del	1943	0.178716	PTEN, 0.074677828	10q23.31del, 0.069996321
9q	del	1927	0.177244	COL5A1, 0.039651944; NOTCH1, 0.039431655
4p	del	1901	0.174853
10p	del	1781	0.163815
21	del	1704	0.156733
4q	del	1692	0.155629	FAT1, 0.062231523; FBXW7, 0.037669347	4q22.1 del, 0.047461369; 4q34.3 del, 0.036975717000000005
3p	del	1682	0.154709	PBRM1, 0.037338914; EPHA3, 0.036127327; CTNNB1, 0.03568675; SETD2, 0.033814297	3p13 del, 0.049392936; 3p14.2 del, 0.059786608; 3p21.31 del, 0.053256070999999995
8p	del	1582	0.145511		8p21.3 del, 0.036883738
16p	amp	1568	0.144224	CREBBP, 0.036567904
14	del	1561	0.14358		14q23.3 del, 0.038447388
15	del	1513	0.139165	MGA, 0.032712854	15q15.1 del, 0.041298748999999996
5q	del	1443	0.132726	APC, 0.058706905999999996; PIK3R1, 0.032051988; NSD1, 0.031721555	5q12.1 del, 0.051968359000000006; 5q15 del, 0.054083885; 5q31.1 del, 0.036331862
11p	del	1379	0.12684
6p	amp	1368	0.125828		6p21.1 amp, 0.034492273999999996; 6p21.33 amp, 0.030629139; 6p22.3 amp, 0.029801325
18p	amp	1212	0.119297
12q	amp	1266	0.116446	KMT2D, 0.08326908200000001; ARID2, 0.031611411; ERBB3, 0.025663619; POLE, 0.023681022000000003	12q13.2 amp, 0.034124356; 12q14.1 amp, 0.043506255; 12q14.3 amp, 0.039735098999999996; 12q15 amp, 0.057119205; 12q21.1 amp, 0.040378955
8p	amp	1265	0.116354		8p11.21 amp, 0.024834437; 8p11.23 amp, 0.054083885; 8p11.23 amp, 0.051324503; 8p12 amp, 0.027685797999999998
19q	amp	1254	0.115342	KMT2B, 0.032051988; CIC, 0.027646217; ARHGAP35, 0.025773763999999998	19q12 amp, 0.041574687; 19q13.12amp, 0.037803532; 19q13.2 amp, 0.039735098999999996; 19q13.32amp, 0.025294333999999998
2p	amp	1235	0.113595	APOB, 0.080845908; ALK, 0.024341888	2p15 amp, 0.024190581000000003
6q	del	1214	0.111663		6q16.1 del, 0.050956586; 6q22.1 del, 0.043230316; 6q26 del, 0.023730684
17q	amp	1208	0.111111	NF1, 0.052869259; ERBB2, 0.022799867999999997	17q11.2 amp, 0.03651582; 17q12 amp, 0.057211185; 17q12 amp, 0.032284768; 17q21.32amp, 0.035779985; 17q21.33amp, 0.040194996000000004; 17q23.1 amp, 0.046817513; 17q24.2 amp, 0.043506255; 17q25.1 amp, 0.040378955
1p	del	1204	0.110743	ARID1A, 0.066857583; MACF1, 0.059808349000000004; MTOR, 0.026985351; NRAS, 0.026765062000000003; NOTCH2, 0.024121599	1p13.2 del, 0.042862399; 1p22.1 del, 0.051692420999999995; 1p31.1 del, 0.038447388; 1p33 del, 0.025202355; 1p36.11 del, 0.048197204; 1p36.23 del, 0.023638705
11q	del	1182	0.10872	ATM, 0.041193964; KMT2A, 0.036567904	11q23.2 del, 0.040378955
10p	amp	1082	0.0995217	GATA3, 0.024011455
21	amp	1049	0.0964864		21q22.11amp, 0.02281089
19p	del	1037	0.0953826	CACNA1A, 0.034254874; SMARCA4, 0.032933142; KEAP1, 0.024341888
16q	amp	960	0.0883002	ZFHX3, 0.044608437; CDH1, 0.024341888; CTCF, 0.019385395	16q22.1 amp, 0.020511405
13	amp	928	0.0853569	RB1, 0.037008481; BRCA2, 0.032712854; DACH1, 0.017623086; FLT3, 0.017623086	13q12.3 amp, 0.026949962999999997; 13q22.1 amp, 0.035320088; 13q34 amp, 0.019499632
9q	amp	904	0.0831494	COL5A1, 0.039651944; NOTCH1, 0.039431655; TLR4, 0.029628814; SPTAN1, 0.027205639; PTCH1, 0.018173808
16p	del	900	0.0827815	CREBBP, 0.036567904; TSC2, 0.021147702999999997	16p13.3 del, 0.027961737
5q	amp	899	0.0826895	APC, 0.058706905999999996; PIK3R1, 0.032051988; NSD1, 0.031721555; MAP3K1, 0.020707126; GABRA6, 0.019605683; RASA1, 0.017953518999999998	5q31.2 amp, 0.023638705
14	amp	895	0.0823216	CHD8, 0.022910012; DICER1, 0.019275251; ZFP36L1, 0.018394096000000002	14q13.3 amp, 0.032928624; 14q21.3 amp, 0.028605592000000003
19p	amp	863	0.0793782	CACNA1A, 0.034254874; SMARCA4, 0.032933142; KEAP1, 0.024341888	19p13.11amp, 0.034952171000000004; 19p13.12amp, 0.044610007; 19p13.2 amp, 0.040194996000000004
9p	amp	847	0.0779065	PTPRD, 0.048573631; CDKN2A, 0.039872233	9p13.3 amp, 0.033756439; 9p21.1 amp, 0.032744665; 9p22.1 amp, 0.017200147
22	amp	819	0.0753311	EP300, 0.033043287000000005; MYH9, 0.027756361; PLXNB2, 0.026324485	22q11.21amp, 0.023454746000000002; 22q12.2 amp, 0.026857983999999998; 22q13.1 amp, 0.025478293; 22q13.2 amp, 0.021063282000000003
6p	del	816	0.0750552
19q	del	764	0.0702723	KMT2B, 0.032051988; CIC, 0.027646217; ARHGAP35, 0.025773763999999998; PPP2R1A, 0.017733231000000002	19q13.2 del, 0.030813097999999997; 19q13.32del, 0.036055923
17q	del	742	0.0682487	NF1, 0.052869259; ERBB2, 0.022799867999999997; BRCA1, 0.020486838; CDK12, 0.020486838; KANSL1, 0.018063663; RNF43, 0.017843375; SPOP, 0.01619121; SOX9, 0.014318758000000001	17q11.2 del, 0.035963944; 17q12 del, 0.03504415; 17q21.31del, 0.043506255; 17q24.3 del, 0.017568065
3p	amp	720	0.0662252	PBRM1, 0.037338914; EPHA3, 0.036127327; CTNNB1, 0.03568675; SETD2, 0.033814297; VHL, 0.022249146; BAP1, 0.021367992000000002; TGFBR2, 0.015089768	3p12.1 amp, 0.01683223; 3p25.1 amp, 0.019959529
2q	amp	707	0.0650294	IDH1, 0.05562286599999999; ERBB4, 0.038550501; NFE2L2, 0.027756361; KIF1A, 0.025553475; SF3B1, 0.021698425; CASP8, 0.017512942; ACVR2A, 0.013988325; CUL3, 0.013988325	2q13 amp, 0.025386312999999997; 2q31.2 amp, 0.043874172; 2q32.2 amp, 0.04111479
15	amp	703	0.0646615	MGA, 0.032712854; SIN3A, 0.016521643	15q26.1 amp, 0.020971302
18q	amp	680	0.062546	SETBP1, 0.026544774; SMAD4, 0.022910012	18q11.2 amp, 0.028789551; 18q11.2 amp, 0.026398087; 18q12.1 amp, 0.029157469; 18q21.1 amp, 0.020603385
4p	amp	659	0.0606144	NSD2, 0.015640489; FGFR3, 0.015310056
11p	amp	654	0.0601545	MUC6, 0.024341888; HRAS, 0.014539046000000002; WT1, 0.014098468999999999	11p11.2 amp, 0.022259014; 11p13 amp, 0.036331862
11q	amp	651	0.0598786	ATM, 0.041193964; KMT2A, 0.036567904; INPPL1, 0.018724529; CTNND1, 0.015310056; PGR, 0.014869479	11q12.3 amp, 0.03200883; 11q13.2 amp, 0.06962840299999999; 11q13.3 amp, 0.100901398; 11q13.4 amp, 0.06401766; 11q14.1 amp, 0.065029433; 11q14.2 amp, 0.039827079; 11q22.2 amp, 0.039551141
3q	del	620	0.0570272	PIK3CA, 0.117523956; POLQ, 0.030289679; ATR, 0.028086793999999998; MECOM, 0.026985351; ZBTB20, 0.019054961999999998; PIK3CB, 0.01233616	3q13.31 del, 0.04727741; 3q22.3 del, 0.033204562; 3q26.31 del, 0.018947756
6q	amp	615	0.0565673	MAP3K4, 0.017953518999999998; LATS1, 0.014539046000000002	6q12 amp, 0.026122149; 6q12 amp, 0.023270787; 6q21 amp, 0.02593819; 6q23.3 amp, 0.028053716; 6q25.1 amp, 0.025202355
17p	amp	568	0.0522443	TP53, 0.37526159299999995; NCOR1, 0.030069391; CHD3, 0.020266549; MAP2K4, 0.011895583000000001	17p11.2 amp, 0.018395879
5p	del	558	0.0513245	NIPBL, 0.034034585; IL7R, 0.019054961999999998
12p	del	553	0.0508646	KRAS, 0.069501046; CHD4, 0.030950545; ATF7IP, 0.017512942	12p13.1 del, 0.03200883
12q	del	550	0.0505887	KMT2D, 0.08326908200000001; ARID2, 0.031611411; ERBB3, 0.025663619; POLE, 0.023681022000000003; TBX3, 0.013768036; ACVR1B, 0.010904285	12q12 del, 0.022626932000000002; 12q23.1 del, 0.026766004
1p	amp	541	0.0497609	ARID1A, 0.066857583; MACF1, 0.059808349000000004; MTOR, 0.026985351; NRAS, 0.026765062000000003; NOTCH2, 0.024121599; EPHA2, 0.015750633; JAK1, 0.013657892; FUBP1, 0.013327459; CSDE1, 0.011785438999999998; THRAP3, 0.011675295	1p31.3 amp, 0.032928624; 1p34.2 amp, 0.050772627
10q	amp	513	0.0471854	PTEN, 0.074677828; RET, 0.020596982; FGFR2, 0.019385395; ARID5B, 0.017182509; TCF7L2, 0.012886881999999999; SMC3, 0.010904285	10q21.2 amp, 0.024650477999999997; 10q22.2 amp, 0.033756439; 10q22.3 amp, 0.033296542; 10q26.13amp, 0.019131713999999998
20p	del	475	0.0436902	PLCB4, 0.027315784; FOXA2, 0.00925212	20p12.1 del, 0.025478293
2q	del	457	0.0420346	IDH1, 0.05562286599999999; ERBB4, 0.038550501; NFE2L2, 0.027756361; KIF1A, 0.025553475; SF3B1, 0.021698425; CASP8, 0.017512942; ACVR2A, 0.013988325; CUL3, 0.013988325; PMS1, 0.009582553	2q21.2 del, 0.035596026; 2q22.1 del, 0.069352465; 2q34 del, 0.018579838
2p	del	430	0.0395511	APOB, 0.080845908; ALK, 0.024341888; DNMT3A, 0.020596982; ASXL2, 0.018504241; SOS1, 0.014539046000000002; EPAS1, 0.013327459; MSH6, 0.010573852; XPO1, 0.01002313; ZFP36L2, 0.009802841999999999; MYCN, 0.008370966; MSH2, 0.008260822
4q	amp	397	0.0365158	FAT1, 0.062231523; FBXW7, 0.037669347; PDGFRA, 0.024341888; KIT, 0.020927415; TET2, 0.019275251; ALB, 0.016631788; IRF2, 0.008150677	4q12 amp, 0.028421633999999998; 4q13.3 amp, 0.036699779; 4q31.21 amp, 0.027777778
7q	del	302	0.0277778	KMT2C, 0.081066197; BRAF, 0.071043066; PIK3CG, 0.026434628999999998; HGF, 0.023130301000000002; KEL, 0.020927415; MET, 0.019275251; GTF2I, 0.014539046000000002; CUL1, 0.012005728; EZH2, 0.008150677	7q11.22 del, 0.024098602; 7q31.1 del, 0.031364974; 7q36.1 del, 0.017935982
7p	del	291	0.026766	EGFR, 0.037779491; CARD11, 0.027976649; PMS2, 0.010463707; RAC1, 0.0073796669999999995
1q	del	282	0.0259382	SPTA1, 0.088115431; PTPRC, 0.030179535; ELF3, 0.013327459; DHX9, 0.01310717; NUP133, 0.012556448999999999; ZBTB7B, 0.010573852; TXNIP, 0.009362265; IRF6, 0.0077101; BTG2, 0.005727503	1q25.1 del, 0.021523179; 1q31.2 del, 0.026674025; 1q41 del, 0.032192789
8q	del	274	0.0252024	CNBD1, 0.014098468999999999; RAD21, 0.01079414; MYC, 0.008150677; SOX17, 0.008150677	8q12.2 del, 0.035504047000000004; 8q21.11 del, 0.035228109; 8q22.1 del, 0.025662252000000003
20q	del	130	0.0119573	ASXL1, 0.021037558999999997; GNAS, 0.020046261; PLCG1, 0.013327459	20q11.23del, 0.02750184; 20q12 del, 0.024926416

## Sheet: Table S1b
Table S1b
List of most prevalent somatic mutations in cancer and their frequencies, from Bailey et al. 2018.
gene	frequency	Cytoband
TP53	0.375262	17p13.1
PIK3CA	0.117524	3q26.32
SPTA1	0.0881154	1q23.1
KMT2D	0.0832691	12q13.12
KMT2C	0.0810662	7q36.1
APOB	0.0808459	2p24.1
PTEN	0.0746778	10q23.31
BRAF	0.0710431	7q34
DMD	0.0702721	Xp21.2
KRAS	0.069501	12p12.1
ARID1A	0.0668576	1p36.11
FAT1	0.0622315	4q35.2
MACF1	0.0598083	1p34.3
APC	0.0587069	5q22.2
ATRX	0.0569446	Xq21.1
IDH1	0.0556229	2q34
NF1	0.0528693	17q11.2
HUWE1	0.0487939	Xp11.22
PTPRD	0.0485736	9p23
ZFHX3	0.0446084	16q22.3
ATM	0.041194	11q22.3
CDKN2A	0.0398722	9p21.3
COL5A1	0.0396519	9q34.3
NOTCH1	0.0394317	9q34.3
ERBB4	0.0385505	2q34
EGFR	0.0377795	7p11.2
FBXW7	0.0376693	4q31.3
PBRM1	0.0373389	3p21.1
RB1	0.0370085	13q14.2
CREBBP	0.0365679	16p13.3
KMT2A	0.0365679	11q23.3
EPHA3	0.0361273	3p11.1
CTNNB1	0.0356867	3p22.1
CACNA1A	0.0342549	19p13.2
NIPBL	0.0340346	5p13.2
SETD2	0.0338143	3p21.31
EP300	0.0330433	22q13.2
SMARCA4	0.0329331	19p13.2
BRCA2	0.0327129	13q13.1
MGA	0.0327129	15q15.1
FLNA	0.0323824	Xq28
KMT2B	0.032052	19q13.12
MED12	0.032052	Xq13.1
PIK3R1	0.032052	5q13.1
NSD1	0.0317216	5q35.3
ARID2	0.0316114	12q12
CHD4	0.0309505	12p13.31
POLQ	0.0302897	3q13.33
PTPRC	0.0301795	1q31.3
NCOR1	0.0300694	17p11.2
TLR4	0.0296288	9q33.1
KDM6A	0.0294085	Xp11.3
ATR	0.0280868	3q23
USP9X	0.0280868	Xp11.4
CARD11	0.0279766	7p22.2
MYH9	0.0277564	22q12.3
NFE2L2	0.0277564	2q31.2
CIC	0.0276462	19q13.2
AMER1	0.0274259	Xq11.2
PLCB4	0.0273158	20p12.2
SPTAN1	0.0272056	9q34.11
MECOM	0.0269854	3q26.2
MTOR	0.0269854	1p36.22
NRAS	0.0267651	1p13.2
BCOR	0.0265448	Xp11.4
SETBP1	0.0265448	18q12.3
PIK3CG	0.0264346	7q22.3
TAF1	0.0264346	Xq13.1
PLXNB2	0.0263245	22q13.33
ARHGAP35	0.0257738	19q13.32
ERBB3	0.0256636	12q13.2
KIF1A	0.0255535	2q37.3
ALK	0.0243419	2p23.2
CDH1	0.0243419	16q22.1
KEAP1	0.0243419	19p13.2
MUC6	0.0243419	11p15.5
PDGFRA	0.0243419	4q12
NOTCH2	0.0241216	1p12
STAG2	0.0241216	Xq25
GATA3	0.0240115	10p14
POLE	0.023681	12q24.33
HGF	0.0231303	7q21.11
CHD8	0.02291	14q11.2
SMAD4	0.02291	18q21.2
ERBB2	0.0227999	17q12
VHL	0.0222491	3p25.3
SF3B1	0.0216984	2q33.1
BAP1	0.021368	3p21.1
TSC2	0.0211477	16p13.3
ASXL1	0.0210376	20q11.21
KEL	0.0209274	7q34
KIT	0.0209274	4q12
MAP3K1	0.0207071	5q11.2
DNMT3A	0.020597	2p23.3
RET	0.020597	10q11.21
BRCA1	0.0204868	17q21.31
CDK12	0.0204868	17q12
CHD3	0.0202665	17p13.1
GNAS	0.0200463	20q13.32
GABRA6	0.0196057	5q34
CTCF	0.0193854	16q22.1
FGFR2	0.0193854	10q26.13
DICER1	0.0192753	14q32.13
MET	0.0192753	7q31.2
TET2	0.0192753	4q24
IL7R	0.019055	5p13.2
ZBTB20	0.019055	3q13.31
INPPL1	0.0187245	11q13.4
ASXL2	0.0185042	2p23.3
ZMYM3	0.0185042	Xq13.1
ZFP36L1	0.0183941	14q24.1
PTCH1	0.0181738	9q22.32
KANSL1	0.0180637	17q21.31
MAP3K4	0.0179535	6q26
RASA1	0.0179535	5q14.3
RNF43	0.0178434	17q22
PPP2R1A	0.0177332	19q13.41
DACH1	0.0176231	13q21.33
FLT3	0.0176231	13q12.2
ATF7IP	0.0175129	12p13.1
CASP8	0.0175129	2q33.1
ARID5B	0.0171825	10q21.2
ALB	0.0166318	4q13.3
SIN3A	0.0165216	15q24.2
SCAF4	0.0164115	21q22.11
SPOP	0.0161912	17q21.33
DIAPH2	0.0159709	Xq21.33
EPHA2	0.0157506	1p36.13
NSD2	0.0156405	4p16.3
JAK3	0.0154202	19p13.11
KDM5C	0.0154202	Xp11.22
FGFR3	0.0153101	4p16.3
CTNND1	0.0153101	11q12.1
SMARCA1	0.0153101	Xq25
TSC1	0.0151999	9q34.13
TGFBR2	0.0150898	3p24.1
LZTR1	0.0148695	22q11.21
PGR	0.0148695	11q22.1
AR	0.0146492	Xq12
GTF2I	0.014539	7q11.23
HRAS	0.014539	11p15.5
LATS1	0.014539	6q25.1
SOS1	0.014539	2p22.1
DDX3X	0.0144289	Xp11.4
SOX9	0.0143188	17q24.3
CNBD1	0.0140985	8q21.3
PDS5B	0.0140985	13q13.1
WT1	0.0140985	11p13
AXIN1	0.0140985	16p13.3
ACVR2A	0.0139883	2q22.3
CUL3	0.0139883	2q36.2
STK11	0.0138782	19p13.3
SMC1A	0.0138782	Xp11.22
TBX3	0.013768	12q24.21
JAK1	0.0136579	1p31.3
RUNX1	0.0136579	21q22.12
RBM10	0.0136579	Xp11.3
FOXA1	0.0134376	14q21.1
ELF3	0.0133275	1q32.1
EPAS1	0.0133275	2p21
FUBP1	0.0133275	1p31.1
PLCG1	0.0133275	20q12
DHX9	0.0131072	1q25.3
LATS2	0.0131072	13q12.11
TCF7L2	0.0128869	10q25.2
AXIN2	0.0126666	17q24.1
NUP133	0.0125564	1q42.13
PIK3CB	0.0123362	3q22.3
ZMYM2	0.0123362	13q12.11
CUL1	0.0120057	7q36.1
MAP2K4	0.0118956	17p12
NF2	0.0118956	22q12.2
CSDE1	0.0117854	1p13.2
GRIN2D	0.0117854	19q13.33
ABL1	0.0116753	9q34.12
THRAP3	0.0116753	1p34.3
ZNF750	0.011455	17q25.3
FGFR1	0.011455	8p11.23
ERCC2	0.0113449	19q13.32
HIST1H1C	0.0113449	6p22.2
EEF1A1	0.0112347	6q13
ESR1	0.0112347	6q25.1
JAK2	0.0110144	9p24.1
TENT5D	0.0110144	Xq21.1
ACVR1B	0.0109043	12q13.13
SMC3	0.0109043	10q25.2
HIST1H1E	0.0107941	6p22.2
RAD21	0.0107941	8q24.11
RNF111	0.0107941	15q22.2
EEF2	0.010684	19p13.3
TCF12	0.0105739	15q21.3
MSH6	0.0105739	2p16.3
ZBTB7B	0.0105739	1q21.3
PMS2	0.0104637	7p22.1
TBL1XR1	0.0104637	3q26.32
AKT1	0.0101333	14q32.33
RHOA	0.0101333	3p21.31
TNFAIP3	0.0101333	6q23.3
MSH3	0.0100231	5q14.1
XPO1	0.0100231	2p15
POLRMT	0.00991299	19p13.3
PSIP1	0.00991299	9p22.3
RXRA	0.00991299	9q34.2
CYLD	0.00980284	16q12.1
IL6ST	0.00980284	5q11.2
ZFP36L2	0.00980284	2p21
KLF5	0.0096927	13q22.1
MLH1	0.0096927	3p22.2
CREB3L3	0.00958255	19p13.3
PMS1	0.00958255	2q32.2
SF1	0.00947241	11q13.1
RFC1	0.00936226	4p14
RPS6KA3	0.00936226	Xp22.12
TXNIP	0.00936226	1q21.1
FOXA2	0.00925212	20p11.21
PIK3R2	0.00925212	19p13.11
B2M	0.00914198	15q21.1
CDKN1A	0.00914198	6p21.2
GNAQ	0.00914198	9q21.2
HLA-B	0.00914198	6p21.33
AJUBA	0.00903183	14q11.2
PTPN11	0.00892169	12q24.13
MAP2K1	0.00881154	15q22.31
ZCCHC12	0.00881154	Xq24
CHEK2	0.0087014	22q12.1
DAZAP1	0.0087014	19p13.3
ZC3H12A	0.00859125	1p34.3
BRD7	0.00848111	16q12.1
MYCN	0.00837097	2p24.3
NUP93	0.00837097	16q13
U2AF1	0.00837097	21q22.3
MSH2	0.00826082	2p21
EZH2	0.00815068	7q36.1
IRF2	0.00815068	4q35.1
MEN1	0.00815068	11q13.1
MYC	0.00815068	8q24.21
PAX5	0.00815068	9p13.2
SMAD2	0.00815068	18q21.1
SOX17	0.00815068	8q11.23
TRAF3	0.00815068	14q32.32
ARAF	0.00793039	Xp11.31
GNA11	0.00782024	19p13.3
CCND1	0.0077101	11q13.3
IRF6	0.0077101	1q32.2
PTPDC1	0.00759996	9q22.32
ACVR1	0.00748981	2q24.1
PHF6	0.00748981	Xq26.2
CYSLTR2	0.00737967	13q14.2
RAC1	0.00737967	7p22.1
RPL22	0.00737967	1p36.31
PTMA	0.00715938	2q37.1
H3F3C	0.00704923	12p11.21
HLA-A	0.00704923	6p22.1
RARA	0.00693909	17q21.2
MAPK1	0.00682895	22q11.21
PCBP1	0.00682895	2p13.3
PPP6C	0.00682895	9q33.3
RAF1	0.00682895	3p25.2
RHOB	0.0067188	2p24.1
RPL5	0.0067188	1p22.1
CDKN1B	0.00660866	12p13.1
PPM1D	0.00660866	17q23.2
TGIF1	0.00660866	18p11.31
IDH2	0.00649851	15q26.1
MAX	0.00649851	14q23.3
PRKAR1A	0.00638837	17q24.2
SMARCB1	0.00638837	22q11.23
EIF1AX	0.00616808	Xp22.12
EGR3	0.00605794	8p21.3
ZNF133	0.00605794	20p11.23
GNA13	0.00594779	17q24.1
BTG2	0.0057275	1q32.1
SRSF2	0.0057275	17q25.1
PIM1	0.00561736	6p21.2
BCL2L11	0.00539707	2q13
FOXQ1	0.00528693	6p25.3
GPS2	0.00506664	17p13.1
NPM1	0.00506664	5q35.1
CBFB	0.00484635	16q22.1
MYD88	0.0047362	3p22.2
CDK4	0.00440577	12q14.1
LEMD2	0.00440577	6p21.31
ATXN3	0.00396519	14q32.12
BCL2	0.00396519	18q21.33
CD79B	0.00385505	17q23.3
CD70	0.00374491	19p13.3
CDKN2C	0.00374491	1p32.3
CNOT9	0.00374491	2q35
RIT1	0.00363476	1q22
H3F3A	0.00341447	1q42.12
KRT222	0.00341447	17q21.2
RHEB	0.00308404	7q36.1
TMSB4X	0.00308404	Xp22.2
MGMT	0.00286375	10q26.3
RRAS2	0.00264346	11p15.2
UNCX	0.00209274	7p22.3
CEBPA	0.00187245	19q13.11
ELOC	0.00187245	8q21.11
CBWD3	0.000660866	9q21.11

## Sheet: Table S1c
Table S1c
List of significantly recurring focal SCNAs and their frequencies, as derived from GISTIC 2.0 analysis.
Significant Focal Amplifications by GISTIC 2.0
Cytoband	Wide Peak Limits	Residual q values after removing segments shared with higher peaks	total SCNAs	frequency
11q13.3	chr11:69448576-69487547(probes 463744:463759)	0	1097	0.100901
11q13.2	chr11:66959287-67190391(probes 462815:462898)	3.7785e-44	757	0.0696284
8q24.21	chr8:128738060-128770551(probes 376391:376408)	9.1214e-180	736	0.0676968
11q14.1	chr11:77472667-77787804(probes 467020:467136)	3.9871e-98	707	0.0650294
11q13.4	chr11:72811269-73107732(probes 465211:465326)	1.5783e-09	696	0.0640177
3q26.2	chr3:169395782-169507091(probes 155420:155457)	1.4526e-82	655	0.0602465
17q12	chr17:36026402-36410558(probes 616323:616379)	8.8199e-247	622	0.0572112
12q15	chr12:69190696-69260427(probes 504585:504624)	4.4347e-175	621	0.0571192
8p11.23	chr8:37297866-37610354(probes 349971:350098)	4.0134e-105	588	0.0540839
8p11.23	chr8:38204079-38267505(probes 350302:350312)	1.1798e-39	558	0.0513245
1p34.2	chr1:40343365-40423030(probes 10137:10162)	1.0533e-70	552	0.0507726
7p11.2	chr7:55025373-55109146(probes 315423:315489)	0	546	0.0502208
17q23.1	chr17:57921224-57943026(probes 623669:623678)	1.0118e-41	509	0.0468175
3q26.33	chr3:181031668-183065606(probes 158831:159446)	9.6446e-37	494	0.0454378
19p13.12	chr19:15309937-15426437(probes 654711:654766)	2.0735e-38	485	0.04461
2q31.2	chr2:178072000-178183352(probes 98159:98205)	1.1306e-16	477	0.0438742
8q22.2	chr8:101236904-101954825(probes 367758:368013)	1.3929e-27	477	0.0438742
12q14.1	chr12:58133257-58155221(probes 499690:499699)	2.3066e-132	473	0.0435063
17q24.2	chr17:64733563-66424922(probes 626015:626593)	2.7104e-08	473	0.0435063
19q12	chr19:30306468-30316875(probes 658139:658148)	8.2898e-99	452	0.0415747
1q22	chr1:154964742-155294150(probes 33028:33140)	9.8462e-05	452	0.0415747
2q32.2	chr2:190744968-192886479(probes 101295:101874)	8.2703e-07	447	0.0411148
1q23.3	chr1:160859515-161255332(probes 35045:35178)	9.1167e-16	446	0.0410228
1q32.1	chr1:204343213-204551829(probes 47487:47600)	7.6941e-32	444	0.0408389
12q21.1	chr12:71730171-72001196(probes 505900:505965)	1.2489e-06	439	0.040379
17q25.1	chr17:73422585-73740999(probes 628849:628959)	2.3696e-14	439	0.040379
17q21.33	chr17:48565678-49171413(probes 620333:620569)	1.4609e-07	437	0.040195
19p13.2	chr19:10721661-10815948(probes 653163:653205)	2.6686e-19	437	0.040195
11q14.2	chr11:80779417-89414796(probes 468563:471479)	0.00092982	433	0.0398271
12q14.3	chr12:66215185-66241371(probes 503053:503066)	8.0171e-15	432	0.0397351
19q13.2	chr19:39697975-39939990(probes 662038:662103)	2.6439e-38	432	0.0397351
11q22.2	chr11:101984748-102501735(probes 475352:475463)	6.5185e-49	430	0.0395511
19q13.12	chr19:35275469-36591430(probes 660385:660909)	1.7148e-07	411	0.0378035
7q22.1	chr7:98407759-100184752(probes 324637:325068)	1.3206e-08	411	0.0378035
4q13.3	chr4:73530210-74636857(probes 180520:180859)	3.2941e-39	399	0.0366998
17q11.2	chr17:27077332-27422160(probes 613487:613629)	9.0484e-36	397	0.0365158
11p13	chr11:34471262-35368699(probes 454912:455306)	8.4262e-28	395	0.0363319
7q21.2	chr7:91743151-92691481(probes 322748:323082)	1.0572e-21	394	0.0362399
17q21.32	chr17:46472402-46639145(probes 619561:619622)	3.1387e-07	389	0.03578
13q22.1	chr13:73888059-73990595(probes 537147:537201)	1.8748e-34	384	0.0353201
19p13.11	chr19:18384598-18616398(probes 655761:655835)	0.00082513	380	0.0349522
6p21.1	chr6:43637064-43979408(probes 265927:266063)	3.1287e-31	375	0.0344923
12q13.2	chr12:56399797-56520008(probes 499037:499100)	0.00078649	371	0.0341244
10q22.2	chr10:76315563-77246920(probes 429687:430028)	1.0659e-11	367	0.0337564
9p13.3	chr9:35641860-35783148(probes 393403:393444)	6.483e-29	367	0.0337564
10q22.3	chr10:79411741-82012098(probes 430846:431549)	3.4375e-16	362	0.0332965
1q21.3	chr1:150342696-151642811(probes 31653:31992)	0.0035492	359	0.0330206
14q13.3	chr14:35642617-37620169(probes 552225:552903)	3.8714e-34	358	0.0329286
1p31.3	chr1:58479334-63201576(probes 15291:16660)	0.0002718	358	0.0329286
9p21.1	chr9:33046040-33492014(probes 392463:392643)	7.0096e-16	356	0.0327447
12p12.1	chr12:25265033-25506286(probes 490793:490946)	2.769e-51	354	0.0325607
17q12	chr17:37848534-37891064(probes 616933:616971)	0.072787	351	0.0322848
11q12.3	chr11:60609973-62739253(probes 461018:461770)	0.17775	348	0.0320088
6p21.33	chr6:30526846-31080431(probes 262145:262284)	0.10759	333	0.0306291
6p22.3	chr6:19759714-21983605(probes 259288:260012)	2.7592e-19	324	0.0298013
18q12.1	chr18:28399425-30863229(probes 638363:639221)	2.1608e-10	317	0.0291575
8q21.13	chr8:80492654-82111770(probes 361748:362217)	0.00023708	315	0.0289735
18q11.2	chr18:20302510-20662281(probes 635394:635511)	8.1986e-09	313	0.0287896
14q21.3	chr14:50292138-50568343(probes 556117:556231)	4.051e-06	311	0.0286056
4q12	chr4:54906305-55256280(probes 175447:175608)	5.4328e-33	309	0.0284216
6q23.3	chr6:135471723-135637823(probes 291556:291641)	2.8929e-08	305	0.0280537
1q42.3	chr1:234726013-235243263(probes 55636:55820)	0.00023916	304	0.0279617
4q31.21	chr4:142686406-145375847(probes 197319:197994)	1.5402e-12	302	0.0277778
8p12	chr8:29024036-32943523(probes 346951:348325)	2.7604e-05	301	0.0276858
13q12.3	chr13:27351223-32074742(probes 524916:526397)	1.4584e-19	293	0.02695
22q12.2	chr22:30053940-30786694(probes 697483:697730)	1.544e-10	292	0.026858
18q11.2	chr18:23827286-24139692(probes 636728:636862)	1.8489e-12	287	0.0263981
7q31.2	chr7:116287035-116689015(probes 329283:329445)	6.1484e-05	286	0.0263061
16p13.13	chr16:11889060-11922718(probes 592217:592229)	0.0042836	285	0.0262141
6q12	chr6:64058041-64496267(probes 270741:270884)	1.457e-11	284	0.0261221
6q21	chr6:107099412-107310105(probes 283147:283237)	1.0875e-22	282	0.0259382
22q13.1	chr22:37943300-38691883(probes 700248:700504)	2.9768e-05	277	0.0254783
2q13	chr2:113949376-114143316(probes 82566:82630)	0.00077391	276	0.0253863
19q13.32	chr19:45176341-45331729(probes 663629:663692)	0.00063788	275	0.0252943
20q13.2	chr20:52144341-52477909(probes 681706:681825)	1.6728e-13	274	0.0252024
6q25.1	chr6:151878095-152090023(probes 296498:296602)	2.0757e-05	274	0.0252024
8p11.21	chr8:41716164-41994150(probes 351826:351927)	1.5015e-09	270	0.0248344
10q21.2	chr10:61385429-64678535(probes 425335:426429)	0.0023803	268	0.0246505
2p15	chr2:59815186-63310277(probes 72206:73103)	0.012079	263	0.0241906
5q31.2	chr5:137055555-140104422(probes 242999:243749)	0.0073976	257	0.0236387
22q11.21	chr22:18613558-22187659(probes 695387:695419)	3.5068e-10	255	0.0234547
6q12	chr6:66594853-76832891(probes 271612:274878)	0.075962	253	0.0232708
21q22.11	chr21:34773372-34978246(probes 691165:691231)	1.9475e-09	248	0.0228109
11p11.2	chr11:44573236-46992625(probes 458062:458837)	0.13207	242	0.022259
8p12	chr8:34297151-35110688(probes 348796:349058)	0.015373	234	0.0215232
22q13.2	chr22:41619227-41914592(probes 701452:701552)	0.11706	229	0.0210633
15q26.1	chr15:90631594-90833738(probes 586332:586414)	0.0059723	228	0.0209713
18q21.1	chr18:46258437-46611140(probes 643496:643626)	0.020434	224	0.0206034
16q22.1	chr16:70246419-70657062(probes 602101:602215)	0.010872	223	0.0205114
3p25.1	chr3:13643979-13843634(probes 116972:117052)	0.00090801	217	0.0199595
12q13.11	chr12:46515810-47070104(probes 495797:495992)	0.026301	216	0.0198675
10p15.1	chr10:5486412-5827073(probes 412508:412603)	0.15142	215	0.0197756
13q34	chr13:107850992-111649698(probes 546078:547245)	0.0088304	212	0.0194996
10q26.13	chr10:122814669-123462450(probes 442380:442685)	4.2177e-06	208	0.0191317
17p11.2	chr17:18860536-19831410(probes 612277:612517)	0.024892	200	0.0183959
9p22.1	chr9:19011247-19695810(probes 386666:386961)	0.013243	187	0.0172001
3p12.1	chr3:83921556-87748381(probes 134857:136017)	0.0076034	183	0.0168322
8p23.1	chr8:11147854-12562454(probes 341926:342080)	2.0409e-06	177	0.0162804
9p24.1	chr9:4186255-6070036(probes 382098:382658)	0.22427	140	0.0128771
Significant Focal Amplifications by GISTIC 2.0
Cytoband	Wide Peak Limits	Residual q values after removing segments shared with higher peaks	total	freq
9p21.3	chr9:21141750-23690570(probes 387695:388956)	0	1645	0.151306
10q23.31	chr10:89617158-90036731(probes 433819:434159)	0	761	0.0699963
13q14.2	chr13:48833767-49064807(probes 531135:531321)	1.3174e-251	760	0.0699043
2q22.1	chr2:139655617-143637838(probes 87957:89586)	1.9967e-285	754	0.0693525
3p14.2	chr3:59030529-61547330(probes 128083:128552)	3.3496e-80	650	0.0597866
5q15	chr5:92929447-93959666(probes 232526:232841)	1.7385e-29	588	0.0540839
3p21.31	chr3:46666794-52938546(probes 124682:126380)	5.4413e-15	579	0.0532561
5q12.1	chr5:58260298-59787985(probes 224252:225015)	2.4796e-243	565	0.0519684
1p22.1	chr1:92947252-93778434(probes 24329:24522)	8.1063e-26	562	0.0516924
6q16.1	chr6:84670006-97539812(probes 276951:280250)	3.0229e-44	554	0.0509566
3p13	chr3:70011169-71592506(probes 131149:131607)	3.053e-26	537	0.0493929
1p36.11	chr1:26899126-27156381(probes 6326:6394)	2.3374e-71	524	0.0481972
4q22.1	chr4:90844993-93231324(probes 185075:185962)	5.8293e-191	516	0.0474614
3q13.31	chr3:116161663-118622337(probes 142569:143618)	3.2062e-70	514	0.0472774
17q21.31	chr17:41621306-42754874(probes 618327:618682)	1.2846e-48	473	0.0435063
6q22.1	chr6:107776565-121401911(probes 283408:287285)	4.9486e-08	470	0.0432303
1p13.2	chr1:110595046-117298070(probes 28621:30486)	1.1213e-20	466	0.0428624
15q15.1	chr15:41403242-42654022(probes 573921:574250)	3.8811e-54	449	0.0412987
11q23.2	chr11:111963481-115045540(probes 477975:478736)	6.4359e-34	439	0.040379
14q23.3	chr14:66963153-67658112(probes 560496:560659)	4.8317e-36	418	0.0384474
1p31.1	chr1:71698947-74522473(probes 19003:19790)	1.6436e-09	418	0.0384474
4q34.3	chr4:178910407-183060693(probes 206337:207553)	1.0654e-47	402	0.0369757
8p21.3	chr8:22106166-27455113(probes 345072:346451)	4.123e-15	401	0.0368837
9p23	chr9:8310705-12693402(probes 383082:384233)	3.7813e-108	396	0.0364238
5q31.1	chr5:102895125-135472193(probes 234743:242656)	0.0209	395	0.0363319
9p21.1	chr9:27572512-28982153(probes 390508:390881)	7.2301e-05	393	0.0361479
16q23.1	chr16:78128899-79628583(probes 604157:605114)	1.6391e-206	392	0.0360559
19q13.32	chr19:47288175-48279236(probes 664268:664540)	5.3744e-17	392	0.0360559
17q11.2	chr17:29326736-29722618(probes 614230:614382)	1.8613e-42	391	0.0359639
2q21.2	chr2:133421383-134889663(probes 86250:86797)	2.0697e-14	387	0.035596
8q12.2	chr8:56436731-65291147(probes 354870:357361)	1.454e-16	386	0.035504
8q21.11	chr8:69728633-86840959(probes 358582:363374)	0.00036282	383	0.0352281
17q12	chr17:31957152-35878837(probes 615319:616264)	0.0011262	381	0.0350442
3q22.3	chr3:135861017-136539591(probes 147615:147786)	2.6623e-08	361	0.0332046
1q41	chr1:212200566-215796672(probes 49961:50953)	1.7119e-21	350	0.0321928
12p13.1	chr12:12793888-12922322(probes 486980:487033)	8.647e-27	348	0.0320088
7q31.1	chr7:109598910-111366370(probes 327503:328072)	8.6645e-86	341	0.031365
19q13.2	chr19:42714132-42907529(probes 662994:663048)	0.00035782	335	0.0308131
17p13.1	chr17:7535461-7591760(probes 609153:609166)	3.7734e-15	314	0.0288815
18q21.2	chr18:48513327-48705371(probes 644202:644306)	1.0675e-13	314	0.0288815
8p23.2	chr8:2079140-6263357(probes 339785:340963)	5.4095e-84	312	0.0286976
16p13.3	chr16:5144019-7772379(probes 590141:590969)	7.7273e-51	304	0.0279617
20q11.23	chr20:35573896-35730920(probes 676212:676325)	0.18825	299	0.0275018
12q23.1	chr12:99124001-100431888(probes 514843:515300)	2.5059e-17	291	0.026766
1q31.2	chr1:192629144-196195419(probes 44111:45184)	0.047576	290	0.026674
8q22.1	chr8:95481914-95654321(probes 366014:366083)	9.4446e-64	279	0.0256623
20p12.1	chr20:14302876-16039144(probes 670762:671423)	4.3935e-112	277	0.0254783
1p33	chr1:48934713-50514967(probes 12595:13056)	8.7501e-06	274	0.0252024
20q12	chr20:37578388-45838725(probes 676925:679637)	0.6382	271	0.0249264
7q11.22	chr7:66780207-70601215(probes 316805:317996)	5.8713e-18	262	0.0240986
6q26	chr6:161693099-163153207(probes 299438:299840)	1.6998e-88	258	0.0237307
1p36.23	chr1:6761586-9650416(probes 941:1793)	1.8517e-06	257	0.0236387
10q21.1	chr10:52644085-54061437(probes 422951:423493)	3.7977e-07	255	0.0234547
17p12	chr17:11896630-12456081(probes 610592:610805)	0.09535	249	0.0229029
12q12	chr12:45831124-46313815(probes 495550:495724)	3.5251e-05	246	0.0226269
18q12.2	chr18:35233918-39060470(probes 640496:641492)	0.044585	235	0.0216152
1q25.1	chr1:173962010-174929599(probes 39174:39460)	0.03533	234	0.0215232
11q14.1	chr11:82995516-85348444(probes 469369:470130)	0.060226	227	0.0208793
3q26.31	chr3:173999806-175760559(probes 156750:157337)	4.122e-33	206	0.0189478
21q22.3	chr21:42827479-43100702(probes 693691:693819)	2.4796e-05	203	0.0186718
2q34	chr2:211541065-214143899(probes 106306:107257)	3.5251e-05	202	0.0185798
7q36.1	chr7:151817415-152136074(probes 338018:338123)	4.9526e-05	195	0.017936
11q13.1	chr11:64573763-65674139(probes 462361:462367)	3.224e-06	194	0.017844
17q24.3	chr17:70116519-70595192(probes 627879:628111)	0.0046552	191	0.0175681
22q12.1	chr22:29192671-29455701(probes 697096:697241)	0.12618	176	0.0161884
6p25.3	chr6:1608632-2252425(probes 253911:254216)	2.3354e-09	144	0.013245

## Sheet: Table S1d
Table S1d
List of recurring fusion genes and their pan-cancer frequency. Fusions were reported for fusion genes recurrent in any tumor type (Gao et al. 2018).
fusion	frequency
ERG--TMPRSS2	0.0188643
FGFR3--TACC3	0.00280546
CCDC6--RET	0.00203154
PML--RARA	0.00154784
AGGF1--RAF1	0.00116088
EGFR--SEPT14	0.00116088
ERG--SLC45A3	0.00116088
ETV6--NTRK3	0.000967399
ABR--YWHAE	0.000870659
ARHGAP26--CLDN18	0.000870659
CBFB--MYH11	0.000870659
DPEP1--TCF25	0.000773919
ETV4--TMPRSS2	0.000773919
PAX8--PPARG	0.000773919
DNAJB1--PRKACA	0.000677179
DTX4--MRPL48	0.000677179
ETV1--SLC45A3	0.000677179
MAML3--UBTF	0.000677179
PUS7--SRPK2	0.000677179
RNF216--TNRC18	0.000677179
SFPQ--TFE3	0.000677179
LRRC31--MECOM	0.000580439
RUNX1--RUNX1T1	0.000580439
SS18--SSX2	0.000580439
ALK--EML4	0.000483699
BRAF--SND1	0.000483699
CTTN--ERBB2	0.000483699
PCMTD1--ST18	0.000483699
PRCC--TFE3	0.000483699
ABL1--BCR	0.000386959
ACAP2--XXYLT1	0.000386959
ARHGEF18--INSR	0.000386959
ASCC1--MICU1	0.000386959
CABLES1--RBBP8	0.000386959
CAMKK2--KDM2B	0.000386959
ERBB2--PPP1R1B	0.000386959
KMT2A--MLLT10	0.000386959
NCOA4--RET	0.000386959
NF1--RAB11FIP4	0.000386959
PDLIM1--SORBS1	0.000386959
ATP11A--MCF2L	0.00029022
ATP1B3--GRK7	0.00029022
BCAS3--VMP1	0.00029022
CC2D2B--ENTPD1	0.00029022
CCDC178--KLHL14	0.00029022
CCNA2--KIAA1109	0.00029022
DAZL--RFTN1	0.00029022
DCAF6--MPZL1	0.00029022
DNAJB6--UBE3C	0.00029022
ELL--KMT2A	0.00029022
ERG--NDRG1	0.00029022
FAM208B--NET1	0.00029022
FRYL--OCIAD2	0.00029022
KRTAP5-10--NADSYN1	0.00029022
MIR205HG--RPL14	0.00029022
NKD1--NOD2	0.00029022
NSD1--NUP98	0.00029022
PDS5B--UBR2	0.00029022
PVT1--QRSL1	0.00029022
SORL1--TBCEL	0.00029022
SS18--SSX1	0.00029022
TCF7L2--VTI1A	0.00029022
TERT--TRIO	0.00029022
AAMDC--TMEM135	0.00019348
ABHD3--ESCO1	0.00019348
ABHD6--FLNB	0.00019348
ABL1--NUP214	0.00019348
ACAA2--MYO5B	0.00019348
ACAP3--UBE2J2	0.00019348
ACER2--DENND4C	0.00019348
ACKR3--CASC4	0.00019348
ACLY--DNAJC7	0.00019348
ACOT7--KCNAB2	0.00019348
ACOX1--SRP68	0.00019348
ACPP--ZNF462	0.00019348
ACSL3--SGPP2	0.00019348
ACTG2--TET3	0.00019348
ACVR1--NFATC1	0.00019348
ADAM12--C10orf90	0.00019348
ADAM2--KAT6A	0.00019348
ADAMTS14--SGPL1	0.00019348
ADAMTS17--CERS3	0.00019348
ADGRL3--GPM6A	0.00019348
ADK--KAT6B	0.00019348
AFF1--PTPN13	0.00019348
AHRR--PLEKHG4B	0.00019348
AKR1C3--AKR1E2	0.00019348
AKR1D1--SYPL1	0.00019348
ALDH3A1--ULK2	0.00019348
ALDOA--COL1A1	0.00019348
ALPK2--NEDD4L	0.00019348
ANKRD31--FAM169A	0.00019348
ANTXR2--CHMP1A	0.00019348
ANXA13--FBXO32	0.00019348
AP4M1--LAMTOR4	0.00019348
APOPT1--MARK3	0.00019348
ARFGAP3--TBC1D22A	0.00019348
ARHGEF1--TMEM120A	0.00019348
ARHGEF11--ETV3	0.00019348
ARMC9--PSMD1	0.00019348
ASB4--DYNC1I1	0.00019348
ASPH--CHD7	0.00019348
ASXL1--XKR7	0.00019348
ATF7--LRIG3	0.00019348
ATG13--TSPAN18	0.00019348
ATG7--SETD5	0.00019348
ATOH8--GNLY	0.00019348
ATP2B2--NFASC	0.00019348
ATXN3--TC2N	0.00019348
BCAM--NECTIN2	0.00019348
BCAS3--RAD51C	0.00019348
BEND5--SPATA6	0.00019348
BEND7--FRMD4A	0.00019348
BEST3--MYRFL	0.00019348
BICC1--FGFR2	0.00019348
BLM--UNC45A	0.00019348
C11orf70--YAP1	0.00019348
C11orf80--F3	0.00019348
C11orf84--MARK2	0.00019348
C12orf66--PLAT	0.00019348
C16orf96--MGRN1	0.00019348
C20orf144--ZNF341	0.00019348
C6orf62--KIAA0319	0.00019348
CA10--LLGL2	0.00019348
CA3--E2F5	0.00019348
CACNB1--CDC6	0.00019348
CACNG3--CCT2	0.00019348
CAP1--SMAP2	0.00019348
CAPRIN1--CD44	0.00019348
CAPS2--FRS2	0.00019348
CAPZB--TMCO4	0.00019348
CASC4--CTDSPL2	0.00019348
CASR--CSTA	0.00019348
CASZ1--MTOR	0.00019348
CAT--PDHX	0.00019348
CBFA2T2--CHMP4B	0.00019348
CCM2--PPIA	0.00019348
CCT3--IQGAP3	0.00019348
CD200R1--ZBTB20	0.00019348
CD74--ROS1	0.00019348
CDC42EP4--FAM104A	0.00019348
CDK12--RARA	0.00019348
CDK13--POU6F2	0.00019348
CEBPG--GPATCH1	0.00019348
CEBPZ--EIF2AK2	0.00019348
CEL--CPA1	0.00019348
CELSR2--SORT1	0.00019348
CEP350--TOR1AIP1	0.00019348
CFAP54--FRS2	0.00019348
CFAP57--KDM4A	0.00019348
CFAP70--DNAJC9	0.00019348
CHD1--RGMB	0.00019348
CHD7--TOX	0.00019348
CHMP1A--TMEFF2	0.00019348
CHRNE--PELP1	0.00019348
CKS1B--ZBTB7B	0.00019348
CLEC16A--LITAF	0.00019348
CLEC16A--TXNDC11	0.00019348
CLIP4--TOGARAM2	0.00019348
CLNS1A--GAB2	0.00019348
CLYBL--PCCA	0.00019348
CMSS1--ZNF90	0.00019348
CNGB1--KIFC3	0.00019348
CNTNAP2--KMT2C	0.00019348
COL27A1--ZNF618	0.00019348
COMMD6--TBC1D4	0.00019348
CORO1C--SART3	0.00019348
COX6C--ZFPM2	0.00019348
CP--SOX5	0.00019348
CPM--MYRFL	0.00019348
CPM--TSFM	0.00019348
CPNE4--MRPL3	0.00019348
CPS1--MAP2	0.00019348
CRAMP1--HN1L	0.00019348
CSNK2A1--SNRPB	0.00019348
CTDSP2--LGR5	0.00019348
CTPS2--RBBP7	0.00019348
CYP2C18--HELLS	0.00019348
DAND5--NFIX	0.00019348
DCP2--REEP5	0.00019348
DDHD2--PROSC	0.00019348
DGKG--TMPRSS2	0.00019348
DHX33--NLRP1	0.00019348
DIAPH3--TDRD3	0.00019348
DNAJC1--NEBL	0.00019348
DNM1L--FGD4	0.00019348
DNM1L--PKP2	0.00019348
DNM2--ILF3	0.00019348
DOCK9--STK24	0.00019348
DPYSL3--PPP2R2B	0.00019348
DTX3--FRS2	0.00019348
DYNLRB1--ITCH	0.00019348
DYRK1A--TTC3	0.00019348
EEF2K--VWA3A	0.00019348
EFCAB3--TANC2	0.00019348
EFHD1--EIF4E2	0.00019348
EGFR--SEC61G	0.00019348
EGLN3--SLC25A21	0.00019348
EHD2--SELENOW	0.00019348
EIF2AK1--FSCN1	0.00019348
EIF5--MARK3	0.00019348
ELDR--SEC61G	0.00019348
EPCAM--MSH2	0.00019348
EPS8L2--TSPAN4	0.00019348
ERBB2--PSMB3	0.00019348
ERC1--RET	0.00019348
ERGIC1--RANBP17	0.00019348
ERO1B--HEATR1	0.00019348
ETV1--LUC7L2	0.00019348
ETV5--TMPRSS2	0.00019348
EVPL--SRP68	0.00019348
EXOSC7--ZDHHC3	0.00019348
EYA3--SUSD6	0.00019348
EYS--RIOK1	0.00019348
EZR--ROS1	0.00019348
FAM134B--FBXL7	0.00019348
FAM184A--MCM9	0.00019348
FBXL20--MSL1	0.00019348
FBXL20--SYNRG	0.00019348
FGG--PLRG1	0.00019348
FGL1--MTUS1	0.00019348
FGR--WASF2	0.00019348
FH--OPN3	0.00019348
FHOD3--MOCOS	0.00019348
FIG4--WASF1	0.00019348
FIP1L1--PDGFRA	0.00019348
FRMD8--SCYL1	0.00019348
FRS2--PTPRR	0.00019348
FRS2--TMTC2	0.00019348
GAB2--INTS4	0.00019348
GABRP--KCNIP1	0.00019348
GALNT7--SAP30	0.00019348
GATAD2B--KCNN3	0.00019348
GIT2--TRPV4	0.00019348
GLS--MYO1B	0.00019348
GNAQ--VEPH1	0.00019348
GNAS--TYMS	0.00019348
GNB1--NADK	0.00019348
GNPTG--HAGH	0.00019348
GP2--LYZ	0.00019348
GPAT3--MRPS18C	0.00019348
HDDC2--RNF217	0.00019348
HECTD2--PCGF5	0.00019348
HEPHL1--PANX1	0.00019348
HERC1--PCLAF	0.00019348
HOOK2--TNPO2	0.00019348
IFT88--RUNX2	0.00019348
IGF2--UNC5B	0.00019348
IKBKB--KAT6A	0.00019348
IKZF3--STARD3	0.00019348
IL20RB--STAG1	0.00019348
ILF3--QTRT1	0.00019348
ILF3--ZNF627	0.00019348
IMMP2L--SND1	0.00019348
IRF2BP2--NTRK1	0.00019348
IRF2BP2--SP2	0.00019348
KALRN--RYK	0.00019348
KAT14--SEC23B	0.00019348
KCNB2--LRP12	0.00019348
KDM5A--NINJ2	0.00019348
KIAA1324--SARS	0.00019348
KIF22--MVP	0.00019348
KLC1--MARK3	0.00019348
LANCL2--SEPT14	0.00019348
LGR5--TSPAN8	0.00019348
LHFPL4--SRGAP3	0.00019348
LRP1--OS9	0.00019348
LRRC1--TRAF7	0.00019348
LRRC41--PIK3R3	0.00019348
LYZ--SMG1	0.00019348
MAP4K3--TMEM178A	0.00019348
MARS--OS9	0.00019348
MCM5--TOM1	0.00019348
ME1--UBE3D	0.00019348
ME3--PICALM	0.00019348
MEGF8--PRR19	0.00019348
MERTK--TMEM87B	0.00019348
MET--PTPRZ1	0.00019348
MICALL2--UCKL1	0.00019348
MKRN2--PPARG	0.00019348
MLLT10--PICALM	0.00019348
MNAT1--TMCC2	0.00019348
MPO--RPL13	0.00019348
MPO--RPS8	0.00019348
MRPS21--TARS2	0.00019348
MSI2--TEX2	0.00019348
MTF2--RPL5	0.00019348
MTHFD1L--THEMIS	0.00019348
MYEOV--SHANK2	0.00019348
MYO1D--TMIGD1	0.00019348
MYO3B--TSHZ2	0.00019348
N4BP2--RHOH	0.00019348
NCALD--UBR5	0.00019348
NEBL--SKIDA1	0.00019348
NEDD1--TMTC2	0.00019348
NFASC--SOX13	0.00019348
NFIX--RAD23A	0.00019348
NLRP1--WSCD1	0.00019348
NOC4L--PTGDS	0.00019348
NOTCH2--REG4	0.00019348
NRP2--PARD3B	0.00019348
NXPE3--ZPLD1	0.00019348
OS9--TSFM	0.00019348
PACRG--QKI	0.00019348
PACS1--ZDHHC24	0.00019348
PAMR1--SLC1A2	0.00019348
PCCA--ZIC2	0.00019348
PCTP--RARA	0.00019348
PDCD6--PLEKHG4B	0.00019348
PDIA3--WDR76	0.00019348
PELP1--UBE2G1	0.00019348
PEMT--TOM1L2	0.00019348
PFDN4--SNAI1	0.00019348
PHF21A--TTC25	0.00019348
PIK3CA--TBL1XR1	0.00019348
PLEKHD1--SUSD6	0.00019348
PLEKHF1--URI1	0.00019348
PLXNA1--TNK2	0.00019348
PMFBP1--ZFHX3	0.00019348
POLD3--RNF169	0.00019348
POU5F1B--PVT1	0.00019348
PPFIA1--SHANK2	0.00019348
PPP6R3--TMPRSS6	0.00019348
PRC1--VPS33B	0.00019348
PRDX1--TESK2	0.00019348
PRKCA--RGS9	0.00019348
PUM1--SDC3	0.00019348
PVT1--SLC30A8	0.00019348
PXN--RAB35	0.00019348
R3HDM1--UBXN4	0.00019348
R3HDM2--RAP1B	0.00019348
R3HDM2--TSFM	0.00019348
RAD18--SRGAP3	0.00019348
RAD52--WNK1	0.00019348
RALGAPA1--SLC25A21	0.00019348
RBM34--TARBP1	0.00019348
RNF185--SMTN	0.00019348
ROS1--SLC34A2	0.00019348
RPRD1A--SLC39A6	0.00019348
RRBP1--TASP1	0.00019348
SERINC2--ZCCHC17	0.00019348
SESTD1--ZNF385B	0.00019348
SFPQ--TFEB	0.00019348
SFRP4--TSKU	0.00019348
SFTPB--TLN1	0.00019348
SKAP1--SPAG9	0.00019348
SLC16A14--TRIP12	0.00019348
SLC5A1--YWHAH	0.00019348
SLC9A3R1--TBCD	0.00019348
SMYD3--TFB2M	0.00019348
SYN2--TSEN2	0.00019348
TAF4--TSHZ2	0.00019348
TATDN2--VHL	0.00019348
THADA--TRA2A	0.00019348
THAP10--THSD4	0.00019348
TMEM109--TMPRSS2	0.00019348
TRMU--TTC38	0.00019348
TTC28--XBP1	0.00019348
USP48--WNT4	0.00019348
WDR34--ZER1	0.00019348
ZNF587B--ZSCAN4	0.00019348

## Sheet: Table S1e
Table S1e
List of hyper- or hypo-methylated genes leading to significant epigenetic silencing (top) or enhacement (bottom) (Saghafinia et al. 2018).
Significantly Silenced Genes
gene	frequency
FUZ	0.12411
LRRC61	0.121736
SPAG16	0.117158
OCIAD2	0.102068
ZFP3	0.0937606
NMNAT3	0.0925738
RHOD	0.0876568
DNAJA4	0.083079
ZNF860	0.0817226
ZNF607	0.0807053
SH2D4A	0.0766361
CHFR	0.0751102
XKR8	0.0746016
ZNF773	0.0715497
ALKBH3	0.071041
FCHSD1	0.0703628
ZNF304	0.0695151
ZNF544	0.069176
ACTR3C	0.0671414
C2ORF70	0.0669719
H2AFJ	0.0635809
HTATIP2	0.0634113
ALDH7A1	0.0627331
ZNF419	0.0618854
GBP1	0.0617158
C9ORF64	0.0606985
DENND2D	0.0600203
ECHDC2	0.0584944
TCIRG1	0.0579858
CCDC122	0.057138
LOC339290	0.0567989
SLC27A3	0.0566294
FABP5	0.0564598
ZNF585A	0.0562903
FES	0.0556121
SLC25A20	0.0556121
VRK2	0.0556121
PRTFDC1	0.0542557
KLHDC9	0.0540861
LTBR	0.0535775
CTSZ	0.0534079
HSPB1	0.0534079
STAT6	0.0530688
RNF135	0.0522211
STBD1	0.0520515
LGALS8	0.051882
ADPRH	0.0515429
LOC728819	0.0508647
C18ORF18	0.0505256
PNPLA4	0.0505256
ARAP3	0.0496779
HSBP1L1	0.0496779
ZNF69	0.0496779
SP100	0.0495083
C3ORF18	0.0491692
C7ORF13	0.0491692
ZNF550	0.0491692
HIST1H2BH	0.0488301
B3GNT5	0.048491
CMBL	0.0483215
OSBPL10	0.0483215
G0S2	0.0481519
TTC12	0.0481519
ZNF586	0.0481519
LRRC8E	0.0479824
MX1	0.0479824
C9ORF89	0.0471346
CCDC114	0.046626
FAS	0.0464564
AP1S3	0.0462869
HEBP2	0.0461173
TCEA3	0.0456087
HIST1H2AE	0.0454391
ACADS	0.0452696
KLHL26	0.0451
CYB5R1	0.0449305
GALNT3	0.0449305
MDK	0.0449305
COL9A3	0.0447609
CLIC1	0.0445914
AS3MT	0.0444218
CFLAR	0.0442523
LLGL2	0.0440827
RASSF10	0.0440827
MYL12A	0.0439132
PXMP4	0.0439132
BIRC3	0.0437436
CLCF1	0.0437436
HEBP1	0.0437436
SLC26A4	0.0437436
SLC25A45	0.0435741
ZNF543	0.0435741
ZDHHC8P	0.0434045
ELL3	0.043235
CTNNA1	0.0430654
TICAM2	0.0430654
CBLN3	0.0428959
EMP3	0.0428959
ENTPD2	0.0428959
ADAMTSL4	0.0427263
PICK1	0.0427263
TGIF1	0.0425568
APOBEC3G	0.0423872
MMP11	0.0423872
RILP	0.0423872
LENG9	0.0422177
MAP2K3	0.0422177
C11ORF63	0.0420482
KHNYN	0.0420482
TPPP3	0.0420482
UPP1	0.0420482
NFKBIZ	0.0418786
TNFRSF1A	0.0418786
LITAF	0.0417091
NAAA	0.0417091
TMBIM1	0.0417091
ACCS	0.0415395
APOBEC3F	0.0415395
PAMR1	0.0415395
B3GNT7	0.0412004
DDB2	0.0412004
GRAMD2	0.0412004
CUL7	0.0410309
RBP1	0.0410309
SLC12A7	0.0410309
CCDC109B	0.0408613
DOK7	0.0408613
ERBB2	0.0408613
ZDHHC12	0.0408613
ABCA5	0.0406918
SGMS2	0.0406918
NMRAL1	0.0405222
TAGLN2	0.0405222
TOM1L1	0.0405222
ADSSL1	0.0403527
IL20RA	0.0403527
ADAM33	0.0401831
LTBP1	0.0400136
POLR1D	0.039844
FKBP9	0.0396745
LACTB2	0.0396745
LOC145783	0.0396745
TRIM4	0.0396745
CD109	0.0393354
LGALS1	0.0391658
CAST	0.0389963
CDKL2	0.0389963
FAM179B	0.0389963
PHF11	0.0389963
TRMT12	0.0386572
LATS2	0.0384876
KDELC2	0.037979
DEDD2	0.0376399
PPP1R3C	0.0374703
ZAK	0.0371312
ZNF268	0.036453
CD58	0.0362835
HLTF	0.0362835
STEAP3	0.0362835
ZNF529	0.0357748
N6AMT2	0.0356053
MTERF	0.0352662
PTRF	0.0352662
EPM2AIP1	0.0349271
ISG20	0.0344184
ZNF35	0.0344184
MINA	0.0340793
MTX3	0.0339098
IVD	0.0334012
SDC4	0.0334012
MARVELD1	0.0328925
TMCO1	0.032723
SLC36A4	0.0323839
TRIP4	0.0323839
NPHP4	0.0322143
C1ORF85	0.0318752
ZNF493	0.0317057
ZNF14	0.0315361
CHMP4A	0.0310275
ZSCAN16	0.0305188
CCNJ	0.0303493
MLH1	0.0303493
UQCRH	0.0301797
ZNF91	0.0298406
ZNF547	0.0296711
TFCP2	0.0295015
ZNF264	0.0295015
FBXO6	0.029332
FRAS1	0.029332
FUCA2	0.029332
PCBD1	0.0289929
ZNF563	0.0284842
IMPACT	0.0276365
PRDX1	0.0276365
ZNF605	0.0276365
FKBP11	0.0264496
SERP2	0.0261105
ZNF234	0.025941
BLOC1S1	0.0257714
B3GALNT1	0.0256019
LDHA	0.0256019
AQP3	0.0247542
ZNF776	0.0242455
ZNF611	0.0237369
CHCHD5	0.0230587
C5ORF42	0.0215327
MSX2	0.0211936
BBS10	0.0210241
NME3	0.0208545
ABCB6	0.0200068
TTC30A	0.0200068
ZNF572	0.0200068
LGALS3	0.0196677
CDCA7L	0.0194981
GHDC	0.0193286
KCNC3	0.019159
P4HTM	0.019159
RRAS2	0.0186504
TOMM40L	0.0183113
EIF5A2	0.0181417
PLSCR4	0.0174635
ZNF155	0.0174635
THEM4	0.0171244
DUSP23	0.0167854
ALDOC	0.0166158
GALC	0.0164463
CYP2R1	0.0162767
TRIM68	0.0162767
ZNF512	0.0159376
C7ORF46	0.0157681
IRF7	0.0157681
IER3	0.0155985
NHLRC1	0.0152594
PSAT1	0.0152594
ZNF20	0.0152594
ZNF22	0.0152594
ZNF642	0.0152594
LCMT2	0.0150899
FBXL2	0.0149203
PKP1	0.0145812
WDR35	0.0145812
CNN3	0.0142421
HSD17B8	0.0142421
NEK9	0.0142421
SLC41A1	0.0142421
CYHR1	0.013903
AGK	0.0137335
C14ORF169	0.0137335
FSCN1	0.0137335
INADL	0.0137335
NEU1	0.0137335
RFESD	0.0137335
SLC25A38	0.0137335
TMCO6	0.0137335
ATP5G3	0.0135639
C10ORF58	0.0135639
CABYR	0.0133944
TXNRD2	0.0133944
FAM129A	0.0132248
GPX1	0.0130553
ZNF302	0.0130553
ZNF669	0.0130553
LRRK1	0.0128857
ZNF416	0.0123771
ECHDC1	0.0122075
LEKR1	0.012038
ZNF354A	0.012038
ARL10	0.0118684
C10ORF25	0.0118684
HIST1H2BG	0.0116989
TMEM42	0.0113598
MIPOL1	0.0111902
ZNF440	0.0111902
ZSCAN20	0.0111902
SCCPDH	0.0110207
CYB5A	0.0108511
KIAA1826	0.0108511
MT1F	0.0106816
PRDX2	0.0106816
SETD6	0.0106816
SNPH	0.0106816
NBR2	0.010512
TMEM216	0.010512
CYP51A1	0.0103425
HYLS1	0.0101729
ZDHHC4	0.0101729
FAM131A	0.0100034
PLA2G16	0.0100034
CROT	0.00983384
S100A6	0.00949474
PSMB8	0.00932519
ZNF443	0.00932519
TYW3	0.00915565
HEXA	0.0089861
LOC678655	0.0089861
MTL5	0.0089861
THADA	0.0089861
FANCF	0.00881655
HSD17B4	0.00881655
ZNF599	0.00881655
ZNF761	0.00881655
GNPDA2	0.008647
OAT	0.008647
ZNF136	0.008647
CSTF2T	0.00847745
CD320	0.0083079
TSGA14	0.0083079
ZNF558	0.0083079
ZNF830	0.00813835
HYI	0.0079688
SNX7	0.0079688
ZNF441	0.0079688
ZNF44	0.00779925
AGBL2	0.0076297
CCDC125	0.0076297
SLC16A13	0.0076297
TRA2A	0.0076297
ZNF799	0.0076297
ALDH1B1	0.00746016
C19ORF63	0.00746016
FAM188A	0.00746016
TAF7	0.00746016
SNX10	0.00729061
ADM2	0.00712106
BRCA1	0.00712106
DNAJC4	0.00712106
HIST1H2AG	0.00695151
FAM114A1	0.00678196
C7ORF31	0.00661241
FAIM	0.00661241
NPM3	0.00661241
CLDN3	0.00644286
TMEM98	0.00644286
NRAS	0.00627331
ZNF260	0.00627331
TMEM147	0.00610376
FBXO22	0.00593421
ZNF513	0.00593421
CASP2	0.00576467
GNE	0.00576467
AASS	0.00559512
GDAP1	0.00559512
LGTN	0.00559512
RSRC1	0.00559512
ETFB	0.00542557
SLC25A46	0.00542557
CIB2	0.00525602
FAH	0.00525602
ACN9	0.00508647
NETO2	0.00508647
SEMA4G	0.00508647
VSNL1	0.00508647
FBXO44	0.00491692
G6PC3	0.00491692
MYD88	0.00491692
NUDT16	0.00491692
PECR	0.00491692
TOR3A	0.00491692
FAM188B	0.00474737
ITPKB	0.00474737
LOC153684	0.00474737
P2RY2	0.00474737
WDR76	0.00474737
A2LD1	0.00457782
NMI	0.00457782
NUDT19	0.00457782
PECI	0.00457782
AIFM2	0.00440827
ATPAF1	0.00440827
CARKD	0.00440827
ERBB2IP	0.00440827
KDELC1	0.00440827
TMEM136	0.00440827
TRIM13	0.00440827
TP53INP1	0.00423872
CITED4	0.00406918
CPNE3	0.00406918
DHCR24	0.00406918
RHBDD1	0.00406918
SLC25A21	0.00406918
ATL3	0.00389963
RFXAP	0.00389963
ST14	0.00389963
TNFRSF10A	0.00389963
LAPTM4B	0.00373008
WDR31	0.00373008
YBX2	0.00373008
CTHRC1	0.00356053
HIST4H4	0.00356053
SHROOM1	0.00356053
STARD3NL	0.00356053
ZNF670	0.00356053
PFN4	0.00339098
PPP1R9B	0.00339098
AMPD2	0.00322143
MTSS1	0.00322143
NSMAF	0.00322143
PLCD1	0.00322143
STOM	0.00322143
CYB5D1	0.00305188
PLEKHG6	0.00305188
TMCO4	0.00305188
TTC30B	0.00305188
ALS2CL	0.00288233
FAM135A	0.00288233
LOC389332	0.00288233
PRELID2	0.00288233
SYNM	0.00288233
TP53TG1	0.00288233
TUBA1C	0.00288233
ANKRD43	0.00271278
ASNS	0.00271278
B3GALTL	0.00271278
CELSR1	0.00271278
CLDN1	0.00271278
EID1	0.00271278
PCCA	0.00271278
PFKFB2	0.00271278
PPP2R3A	0.00271278
PSMD5	0.00271278
SH3RF2	0.00271278
UBA5	0.00271278
ZNF555	0.00271278
CCNDBP1	0.00254323
EPHA2	0.00254323
FBXO4	0.00254323
MORN3	0.00254323
PHLDA3	0.00254323
TTC22	0.00254323
DCTD	0.00237369
ETV1	0.00237369
FARP1	0.00237369
HSPA2	0.00237369
MFSD8	0.00237369
NME6	0.00237369
RNASE4	0.00220414
RNF207	0.00220414
SFXN5	0.00220414
SOX12	0.00220414
THNSL1	0.00220414
AIM1	0.00203459
CAMKK1	0.00203459
DDR1	0.00203459
EDC3	0.00203459
EZR	0.00203459
N4BP2L1	0.00203459
PEX11A	0.00203459
AMIGO1	0.00186504
CDC42EP4	0.00186504
CRYL1	0.00186504
CYB561	0.00186504
DEXI	0.00186504
DYRK1B	0.00186504
EML2	0.00186504
EPB41L4A	0.00186504
ETV2	0.00186504
FZD9	0.00186504
KIAA0195	0.00186504
NINL	0.00186504
NT5C	0.00186504
STMN1	0.00186504
TMX4	0.00186504
TRAF3IP2	0.00186504
UBXN11	0.00186504
ZNF438	0.00186504
ACOT11	0.00169549
ENAH	0.00169549
FOXQ1	0.00169549
ILVBL	0.00169549
KIFC2	0.00169549
MAGI2	0.00169549
NFIA	0.00169549
NNT	0.00169549
PAPLN	0.00169549
PEX10	0.00169549
RAB4A	0.00169549
SESN3	0.00169549
SLC16A1	0.00169549
ST6GALNAC2	0.00169549
TMED3	0.00169549
VPS39	0.00169549
ZNF616	0.00169549
ZNF721	0.00169549
ABHD14A	0.00152594
AMDHD2	0.00152594
C5ORF35	0.00152594
CCNB2	0.00152594
CLDN23	0.00152594
FAM161A	0.00152594
FAM83B	0.00152594
GLUL	0.00152594
PRNP	0.00152594
SLC22A5	0.00152594
ZKSCAN3	0.00152594
AIMP2	0.00135639
ATP10D	0.00135639
C13ORF27	0.00135639
DDAH2	0.00135639
DECR1	0.00135639
HSPA4	0.00135639
KCTD12	0.00135639
MICAL1	0.00135639
NHEDC2	0.00135639
OSBPL8	0.00135639
PCYOX1L	0.00135639
SLC15A4	0.00135639
SNHG11	0.00135639
ACP6	0.00118684
APH1B	0.00118684
CHST15	0.00118684
DOM3Z	0.00118684
EML3	0.00118684
FAM83H	0.00118684
GALT	0.00118684
GRTP1	0.00118684
GSDMD	0.00118684
LOC148709	0.00118684
NIPSNAP1	0.00118684
PDK2	0.00118684
PHGDH	0.00118684
ROM1	0.00118684
RWDD3	0.00118684
SQLE	0.00118684
TGFBI	0.00118684
TMEM64	0.00118684
TSC22D4	0.00118684
ZNF273	0.00118684
C6ORF47	0.00101729
CBX1	0.00101729
CPT1A	0.00101729
DBNDD1	0.00101729
HSD3B7	0.00101729
INHBB	0.00101729
JMJD8	0.00101729
LIX1L	0.00101729
LOC100133985	0.00101729
MAGEF1	0.00101729
MANBAL	0.00101729
NPAS2	0.00101729
PACS1	0.00101729
PGPEP1	0.00101729
PPAPDC1B	0.00101729
RBPMS2	0.00101729
RTKN	0.00101729
SNUPN	0.00101729
TMEM194B	0.00101729
TP53I3	0.00101729
TUBGCP5	0.00101729
ACVR1C	0.000847745
ARL4A	0.000847745
ASB8	0.000847745
ASPH	0.000847745
ASTE1	0.000847745
BEND6	0.000847745
BRD2	0.000847745
C1ORF57	0.000847745
C6ORF162	0.000847745
CDKN1C	0.000847745
CEBPD	0.000847745
CEP70	0.000847745
DSP	0.000847745
ENO2	0.000847745
EVI5	0.000847745
FAM189B	0.000847745
GPRC5C	0.000847745
HDAC1	0.000847745
HIVEP3	0.000847745
KDM5B	0.000847745
KIAA1244	0.000847745
KIAA1804	0.000847745
LIMD1	0.000847745
MARCKSL1	0.000847745
NDFIP1	0.000847745
PELI1	0.000847745
REEP2	0.000847745
SEPT7	0.000847745
SLC22A4	0.000847745
ZCCHC2	0.000847745
ZFP41	0.000847745
ZMYM5	0.000847745
ZNF643	0.000847745
Significantly Enhanced Genes
gene	frequency
SYCP2	0.0881655
MAGEC2	0.0779925
GTSF1	0.075958
DCAF4L2	0.0544252
SLC45A2	0.0523906
MAGEB2	0.0513733
TBC1D16	0.0501865
DDX53	0.0462869
BIRC7	0.0435741
LOC100133469	0.0412004
FAM178B	0.0384876
ERMN	0.0350966
PNLDC1	0.0335707
TKTL1	0.0335707
MAGEB1	0.0334012
BCL2L10	0.0291624
PNMA5	0.0288233
SSX1	0.0288233
ZNF541	0.0284842
MC1R	0.0262801
SLC1A7	0.0262801
TUBA3C	0.0237369
CCDC146	0.02255
PAGE2	0.0210241
RASGRF1	0.0194981
NAA11	0.0183113
SOX30	0.0155985
PIWIL2	0.0150899
IGF2	0.0147508
MAEL	0.0140726
LOC150185	0.0137335
ALOX12	0.0127162
GLUL	0.0127162
MOV10L1	0.0127162
IRS2	0.012038
TEX14	0.0103425
FTHL17	0.0100034
STK31	0.00949474
BMX	0.00932519
CUX1	0.00915565
SLC6A9	0.008647
LY6K	0.00847745
HORMAD1	0.00779925
MMP8	0.00746016
CTCFL	0.00729061
UGT1A7	0.00661241
HAS3	0.00627331
NCAPD3	0.00627331
TDRD12	0.00627331
GBP5	0.00508647
PRL	0.00508647
DLGAP1	0.00474737
PDCL2	0.00406918
RHOXF1	0.00406918
PTCHD2	0.00389963
EGFL8	0.00322143
SOHLH2	0.00322143
ASB5	0.00271278
C10ORF110	0.00271278
C12ORF40	0.00271278
ZSCAN10	0.00237369
CSNK1A1P	0.00220414
MAGEA8	0.00220414
NEB	0.00203459
BANK1	0.00186504
DPEP3	0.00186504
SEMA4C	0.00186504
CBX8	0.00169549
CXORF67	0.00169549
LILRB4	0.00169549
MYCN	0.00169549
PIWIL4	0.00169549
ATP6V0A4	0.00152594
CLEC2A	0.00152594
PROM1	0.00152594
RPL10L	0.00135639
TMEM88	0.00135639
ANKRD26P1	0.00118684
RPH3AL	0.00118684
CTNNB1	0.00101729
EXOC3	0.00101729
ATP1A1	0.000847745
DMRTC2	0.000847745
LOC729678	0.000847745
MORC1	0.000847745
