# Supplementary material for: Selective and mechanistic pressures shaping cancer aneuploidies
Source: Research Square preprint supplement (doi:10.21203/rs.3.rs-550953/v1), 2021-05-26
Supplement: Supplementary file 4 [file 7ca28b6a2167014c13cc9a3e.xlsx]

## Sheet: Table S3a
Table S3a
List of genes under selection in pan-cancer, with peak information. Peaks are sorted from largest to smallest by Significance Score (combined_sig). Genes are sorted by genomic location.
Start, End = hg19 start and end of gene
Start.1, End.1 = start and end of gene as fraction of chromosome arm (starting in telomere if tSCNA; starting in centromere if cSCNA)
iter = # of iteration
code = unique identifier for each peak; each element separated by a dash represents an iteration. First iteration is always "n" or "p" (for negative or positive), and next iterations include "l" or "r" (for left or right) along with "n" or "p".
Peak.Start, Peak.End = hg19 start and end of BrISCUT peak
Peak.Start.1, Peak.End.1 = start and end of BrISCUT peak as fraction of chromosome arm
ks_stat = Kolmogorov-Smirnov statistic
ks_p = Kolmogorov-Smirnov p-value
log10_ks_p = log10 of KS p-value
ks_by = Kolmogorov-Smirnov q-value (multiple hypothesis correction by the Benjamini-Yekutieli method)
log10_ksby = log10 of KS q-value
combined_sig = log10_ksby * ks_stat = Significance Score
num_genes = number of genes in peak
Chr	Cytoband	Gene	RefSeqName	Start	End	Start.1	End.1	type	arm	direction	telcent	negpos	iter	code	conf	Peak.Start	Peak.End	Peak.Start.1	Peak.End.1	ks_stat	ks_p	log10_ks_p	ksby	log10_ksby	combined_sig	num_genes
5	p15.33	NKD2	NM_001271082	1009076	1038927	0.00213304	0.00280439	PANCAN	5p	amp	tel	p	4	p-ln-ln-lp	0.95	1020354	1287540	0.00238668	0.00839569	0.623884	0	inf	0	16	9.98214	7
5	p15.33	SLC12A7	NM_006598	1050488	1112172	0.0030644	0.00445167	PANCAN	5p	amp	tel	p	4	p-ln-ln-lp	0.95	1020354	1287540	0.00238668	0.00839569	0.623884	0	inf	0	16	9.98214	7
5	p15.33	MIR4635	NR_039778	1063010	1063089	0.00334602	0.00334779	PANCAN	5p	amp	tel	p	4	p-ln-ln-lp	0.95	1020354	1287540	0.00238668	0.00839569	0.623884	0	inf	0	16	9.98214	7
5	p15.33	CTD-3080P12.3	NR_109911	1173210	1178720	0.00582441	0.00594833	PANCAN	5p	amp	tel	p	4	p-ln-ln-lp	0.95	1020354	1287540	0.00238668	0.00839569	0.623884	0	inf	0	16	9.98214	7
5	p15.33	SLC6A19	NM_001003841	1201709	1225230	0.00646536	0.00699434	PANCAN	5p	amp	tel	p	4	p-ln-ln-lp	0.95	1020354	1287540	0.00238668	0.00839569	0.623884	0	inf	0	16	9.98214	7
5	p15.33	SLC6A18	NM_182632	1225469	1246304	0.00699972	0.0074683	PANCAN	5p	amp	tel	p	4	p-ln-ln-lp	0.95	1020354	1287540	0.00238668	0.00839569	0.623884	0	inf	0	16	9.98214	7
5	p15.33	TERT	NM_001193376	1253286	1295162	0.00762532	0.00856711	PANCAN	5p	amp	tel	p	4	p-ln-ln-lp	0.95	1020354	1287540	0.00238668	0.00839569	0.623884	0	inf	0	16	9.98214	7
8	q24.13	LOC105375744	NR_134457	126009230	126010440	0.196614	0.196602	PANCAN	8q	del	tel	n	1	n	0.95	125999170	129681896	0.15905	0.196717	0.460587	0	inf	0	16	7.36939	27
8	q24.13	SQLE	NM_003129	126010719	126034525	0.196599	0.196355	PANCAN	8q	del	tel	n	1	n	0.95	125999170	129681896	0.15905	0.196717	0.460587	0	inf	0	16	7.36939	27
8	q24.13	WASHC5	NM_001330609	126036502	126104061	0.196335	0.195644	PANCAN	8q	del	tel	n	1	n	0.95	125999170	129681896	0.15905	0.196717	0.460587	0	inf	0	16	7.36939	27
8	q24.13	NSMCE2	NM_001349485	126104064	126379367	0.195644	0.192828	PANCAN	8q	del	tel	n	1	n	0.95	125999170	129681896	0.15905	0.196717	0.460587	0	inf	0	16	7.36939	27
8	q24.13	TRIB1	NM_025195	126442562	126450647	0.192182	0.192099	PANCAN	8q	del	tel	n	1	n	0.95	125999170	129681896	0.15905	0.196717	0.460587	0	inf	0	16	7.36939	27
8	q24.13	LINC00861	NR_038447	126934766	126963441	0.187148	0.186855	PANCAN	8q	del	tel	n	1	n	0.95	125999170	129681896	0.15905	0.196717	0.460587	0	inf	0	16	7.36939	27
8	q24.21	LOC101927657	NR_125421	127337739	127341778	0.183026	0.182985	PANCAN	8q	del	tel	n	1	n	0.95	125999170	129681896	0.15905	0.196717	0.460587	0	inf	0	16	7.36939	27
8	q24.21	FAM84B	NM_174911	127564682	127570711	0.180705	0.180643	PANCAN	8q	del	tel	n	1	n	0.95	125999170	129681896	0.15905	0.196717	0.460587	0	inf	0	16	7.36939	27
8	q24.21	PCAT1	NR_045262	128025398	128033259	0.175993	0.175912	PANCAN	8q	del	tel	n	1	n	0.95	125999170	129681896	0.15905	0.196717	0.460587	0	inf	0	16	7.36939	27
8	q24.21	PCAT2	NR_119373	128084938	128094466	0.175384	0.175286	PANCAN	8q	del	tel	n	1	n	0.95	125999170	129681896	0.15905	0.196717	0.460587	0	inf	0	16	7.36939	27
8	q24.21	PRNCR1	NR_109833	128092118	128104840	0.17531	0.17518	PANCAN	8q	del	tel	n	1	n	0.95	125999170	129681896	0.15905	0.196717	0.460587	0	inf	0	16	7.36939	27
8	q24.21	CASC19	NR_120364	128200030	128209872	0.174207	0.174106	PANCAN	8q	del	tel	n	1	n	0.95	125999170	129681896	0.15905	0.196717	0.460587	0	inf	0	16	7.36939	27
8	q24.21	CCAT1	NR_108049	128219626	128231513	0.174006	0.173885	PANCAN	8q	del	tel	n	1	n	0.95	125999170	129681896	0.15905	0.196717	0.460587	0	inf	0	16	7.36939	27
8	q24.21	CASC21	NR_117099	128256881	128404876	0.173625	0.172112	PANCAN	8q	del	tel	n	1	n	0.95	125999170	129681896	0.15905	0.196717	0.460587	0	inf	0	16	7.36939	27
8	q24.21	CASC8	NR_117100	128301920	128494384	0.173165	0.171196	PANCAN	8q	del	tel	n	1	n	0.95	125999170	129681896	0.15905	0.196717	0.460587	0	inf	0	16	7.36939	27
8	q24.21	CCAT2	NR_109834	128412643	128414395	0.172032	0.172014	PANCAN	8q	del	tel	n	1	n	0.95	125999170	129681896	0.15905	0.196717	0.460587	0	inf	0	16	7.36939	27
8	q24.21	POU5F1B	NM_001159542	128427856	128429441	0.171877	0.17186	PANCAN	8q	del	tel	n	1	n	0.95	125999170	129681896	0.15905	0.196717	0.460587	0	inf	0	16	7.36939	27
8	q24.21	CASC11	NR_117102	128712852	128746213	0.168962	0.16862	PANCAN	8q	del	tel	n	1	n	0.95	125999170	129681896	0.15905	0.196717	0.460587	0	inf	0	16	7.36939	27
8	q24.21	MYC	NM_001354870	128747679	128755197	0.168605	0.168529	PANCAN	8q	del	tel	n	1	n	0.95	125999170	129681896	0.15905	0.196717	0.460587	0	inf	0	16	7.36939	27
8	q24.21	PVT1	NR_003367	128806778	129113499	0.168001	0.164864	PANCAN	8q	del	tel	n	1	n	0.95	125999170	129681896	0.15905	0.196717	0.460587	0	inf	0	16	7.36939	27
8	q24.21	MIR1204	NR_031609	128808207	128808274	0.167986	0.167986	PANCAN	8q	del	tel	n	1	n	0.95	125999170	129681896	0.15905	0.196717	0.460587	0	inf	0	16	7.36939	27
8	q24.21	TMEM75	NR_103558	128958804	128960969	0.166446	0.166424	PANCAN	8q	del	tel	n	1	n	0.95	125999170	129681896	0.15905	0.196717	0.460587	0	inf	0	16	7.36939	27
8	q24.21	MIR1205	NR_031610	128972878	128972941	0.166302	0.166301	PANCAN	8q	del	tel	n	1	n	0.95	125999170	129681896	0.15905	0.196717	0.460587	0	inf	0	16	7.36939	27
8	q24.21	MIR1206	NR_031611	129021143	129021202	0.165808	0.165808	PANCAN	8q	del	tel	n	1	n	0.95	125999170	129681896	0.15905	0.196717	0.460587	0	inf	0	16	7.36939	27
8	q24.21	MIR1207	NR_031612	129061397	129061484	0.165397	0.165396	PANCAN	8q	del	tel	n	1	n	0.95	125999170	129681896	0.15905	0.196717	0.460587	0	inf	0	16	7.36939	27
8	q24.21	MIR1208	NR_031613	129162361	129162434	0.164364	0.164363	PANCAN	8q	del	tel	n	1	n	0.95	125999170	129681896	0.15905	0.196717	0.460587	0	inf	0	16	7.36939	27
8	q24.21	LINC00824	NR_121672	129417515	129576925	0.161754	0.160124	PANCAN	8q	del	tel	n	1	n	0.95	125999170	129681896	0.15905	0.196717	0.460587	0	inf	0	16	7.36939	27
3	q26.2	CLDN11	NM_005602	170136652	170152479	0.263978	0.263826	PANCAN	3q	del	tel	n	1	n	0.95	170147874	172215574	0.243951	0.26387	0.438149	0	inf	0	16	7.01039	13
3	q26.2	SLC7A14	NM_020949	170177341	170303863	0.263587	0.262368	PANCAN	3q	del	tel	n	1	n	0.95	170147874	172215574	0.243951	0.26387	0.438149	0	inf	0	16	7.01039	13
3	q26.2	LOC101928583	NR_135556	170185072	170472994	0.263512	0.260738	PANCAN	3q	del	tel	n	1	n	0.95	170147874	172215574	0.243951	0.26387	0.438149	0	inf	0	16	7.01039	13
3	q26.2	RPL22L1	NM_001099645	170582664	170588045	0.259682	0.25963	PANCAN	3q	del	tel	n	1	n	0.95	170147874	172215574	0.243951	0.26387	0.438149	0	inf	0	16	7.01039	13
3	q26.2	EIF5A2	NM_020390	170606203	170626426	0.259455	0.25926	PANCAN	3q	del	tel	n	1	n	0.95	170147874	172215574	0.243951	0.26387	0.438149	0	inf	0	16	7.01039	13
3	q26.2	SLC2A2	NM_001278659	170714136	170744768	0.258415	0.25812	PANCAN	3q	del	tel	n	1	n	0.95	170147874	172215574	0.243951	0.26387	0.438149	0	inf	0	16	7.01039	13
3	q26.31	TNIK	NM_015028	170776202	171178197	0.257817	0.253945	PANCAN	3q	del	tel	n	1	n	0.95	170147874	172215574	0.243951	0.26387	0.438149	0	inf	0	16	7.01039	13
3	q26.2	MIR569	NR_030295	170824452	170824548	0.257353	0.257352	PANCAN	3q	del	tel	n	1	n	0.95	170147874	172215574	0.243951	0.26387	0.438149	0	inf	0	16	7.01039	13
3	q26.31	PLD1	NM_001130081	171318194	171528284	0.252596	0.250572	PANCAN	3q	del	tel	n	1	n	0.95	170147874	172215574	0.243951	0.26387	0.438149	0	inf	0	16	7.01039	13
3	q26.31	TMEM212	NM_001164436	171561138	171577108	0.250256	0.250102	PANCAN	3q	del	tel	n	1	n	0.95	170147874	172215574	0.243951	0.26387	0.438149	0	inf	0	16	7.01039	13
3	q26.31	TMEM212-AS1	NR_046852	171594141	171618530	0.249938	0.249703	PANCAN	3q	del	tel	n	1	n	0.95	170147874	172215574	0.243951	0.26387	0.438149	0	inf	0	16	7.01039	13
3	q26.31	FNDC3B	NM_022763	171757417	172118492	0.248365	0.244886	PANCAN	3q	del	tel	n	1	n	0.95	170147874	172215574	0.243951	0.26387	0.438149	0	inf	0	16	7.01039	13
3	q26.31	GHSR	NM_198407	172161080	172166246	0.244476	0.244426	PANCAN	3q	del	tel	n	1	n	0.95	170147874	172215574	0.243951	0.26387	0.438149	0	inf	0	16	7.01039	13
8	p21.1	SCARA5	NM_173833	27727398	27850369	0.640654	0.64356	PANCAN	8p	del	tel	p	1	p	0.95	27775528	28090343	0.641792	0.649231	0.412662	0	inf	0	16	6.60259	3
8	p21.1	NUGGC	NM_001010906	27879480	27941388	0.644248	0.645711	PANCAN	8p	del	tel	p	1	p	0.95	27775528	28090343	0.641792	0.649231	0.412662	0	inf	0	16	6.60259	3
8	p21.1	ELP3	NM_001284222	27947747	28048669	0.645861	0.648246	PANCAN	8p	del	tel	p	1	p	0.95	27775528	28090343	0.641792	0.649231	0.412662	0	inf	0	16	6.60259	3
17	q24.3	LINC01483	NR_109971	67590127	67899141	0.239492	0.233939	PANCAN	17q	del	tel	n	1	n	0.95	67895465	68616595	0.221046	0.234005	0.358661	0	inf	0	16	5.73858	6
17	q24.3	LINC01497	NR_110874	67957847	67979685	0.232884	0.232491	PANCAN	17q	del	tel	n	1	n	0.95	67895465	68616595	0.221046	0.234005	0.358661	0	inf	0	16	5.73858	6
17	q24.3	LINC01028	NR_104129	68047411	68064236	0.231274	0.230972	PANCAN	17q	del	tel	n	1	n	0.95	67895465	68616595	0.221046	0.234005	0.358661	0	inf	0	16	5.73858	6
17	q24.3	KCNJ16	NM_018658	68071365	68131746	0.230844	0.229759	PANCAN	17q	del	tel	n	1	n	0.95	67895465	68616595	0.221046	0.234005	0.358661	0	inf	0	16	5.73858	6
17	q24.3	KCNJ2-AS1	NR_036534	68163101	68165543	0.229195	0.229151	PANCAN	17q	del	tel	n	1	n	0.95	67895465	68616595	0.221046	0.234005	0.358661	0	inf	0	16	5.73858	6
17	q24.3	KCNJ2	NM_000891	68165675	68176183	0.229149	0.22896	PANCAN	17q	del	tel	n	1	n	0.95	67895465	68616595	0.221046	0.234005	0.358661	0	inf	0	16	5.73858	6
2	q33.1	ANKRD44	NM_001195144	197851385	198175521	0.303292	0.301089	PANCAN	2q	del	tel	n	1	n	0.95	197805899	198934377	0.295931	0.303601	0.340428	0	inf	0	16	5.44685	15
2	q33.1	LOC101927596	NR_135584	198062714	198063997	0.301856	0.301847	PANCAN	2q	del	tel	n	1	n	0.95	197805899	198934377	0.295931	0.303601	0.340428	0	inf	0	16	5.44685	15
2	q33.1	ANKRD44-IT1	NR_046837	198115581	198167243	0.301496	0.301145	PANCAN	2q	del	tel	n	1	n	0.95	197805899	198934377	0.295931	0.303601	0.340428	0	inf	0	16	5.44685	15
2	q33.1	SF3B1	NM_012433	198256697	198299817	0.300537	0.300244	PANCAN	2q	del	tel	n	1	n	0.95	197805899	198934377	0.295931	0.303601	0.340428	0	inf	0	16	5.44685	15
2	q33.1	COQ10B	NM_025147	198318146	198340033	0.30012	0.299971	PANCAN	2q	del	tel	n	1	n	0.95	197805899	198934377	0.295931	0.303601	0.340428	0	inf	0	16	5.44685	15
2	q33.1	HSPD1	NM_199440	198351307	198364998	0.299894	0.299801	PANCAN	2q	del	tel	n	1	n	0.95	197805899	198934377	0.295931	0.303601	0.340428	0	inf	0	16	5.44685	15
2	q33.1	SNORA105A	NR_132787	198351511	198351627	0.299893	0.299892	PANCAN	2q	del	tel	n	1	n	0.95	197805899	198934377	0.295931	0.303601	0.340428	0	inf	0	16	5.44685	15
2	q33.1	SNORA105B	NR_132788	198351511	198351627	0.299893	0.299892	PANCAN	2q	del	tel	n	1	n	0.95	197805899	198934377	0.295931	0.303601	0.340428	0	inf	0	16	5.44685	15
2	q33.1	HSPE1	NM_002157	198364720	198368187	0.299803	0.29978	PANCAN	2q	del	tel	n	1	n	0.95	197805899	198934377	0.295931	0.303601	0.340428	0	inf	0	16	5.44685	15
2	q33.1	HSPE1-MOB4	NM_001202485	198364720	198418423	0.299803	0.299438	PANCAN	2q	del	tel	n	1	n	0.95	197805899	198934377	0.295931	0.303601	0.340428	0	inf	0	16	5.44685	15
2	q33.1	MOB4	NM_199482	198380294	198418423	0.299697	0.299438	PANCAN	2q	del	tel	n	1	n	0.95	197805899	198934377	0.295931	0.303601	0.340428	0	inf	0	16	5.44685	15
2	q33.1	RFTN2	NM_144629	198435526	198540584	0.299322	0.298608	PANCAN	2q	del	tel	n	1	n	0.95	197805899	198934377	0.295931	0.303601	0.340428	0	inf	0	16	5.44685	15
2	q33.1	MARS2	NM_138395	198570027	198573114	0.298408	0.298387	PANCAN	2q	del	tel	n	1	n	0.95	197805899	198934377	0.295931	0.303601	0.340428	0	inf	0	16	5.44685	15
2	q33.1	BOLL	NM_001284358	198591602	198651036	0.298261	0.297857	PANCAN	2q	del	tel	n	1	n	0.95	197805899	198934377	0.295931	0.303601	0.340428	0	inf	0	16	5.44685	15
2	q33.1	PLCL1	NM_006226	198669425	199014608	0.297732	0.295386	PANCAN	2q	del	tel	n	1	n	0.95	197805899	198934377	0.295931	0.303601	0.340428	0	inf	0	16	5.44685	15
17	p13.1	NTN1	NM_004822	8924858	9147317	0.390667	0.401616	PANCAN	17p	amp	tel	n	1	n	0.95	9114837	10228815	0.400017	0.454844	0.332551	0	inf	0	16	5.32082	10
17	p13.1	STX8	NM_004853	9153787	9479275	0.401934	0.417954	PANCAN	17p	amp	tel	n	1	n	0.95	9114837	10228815	0.400017	0.454844	0.332551	0	inf	0	16	5.32082	10
17	p13.1	CFAP52	NM_001080556	9479943	9546776	0.417987	0.421276	PANCAN	17p	amp	tel	n	1	n	0.95	9114837	10228815	0.400017	0.454844	0.332551	0	inf	0	16	5.32082	10
17	p13.1	USP43	NM_001267576	9548853	9633003	0.421378	0.42552	PANCAN	17p	amp	tel	n	1	n	0.95	9114837	10228815	0.400017	0.454844	0.332551	0	inf	0	16	5.32082	10
17	p13.1	DHRS7C	NM_001220493	9674750	9694614	0.427574	0.428552	PANCAN	17p	amp	tel	n	1	n	0.95	9114837	10228815	0.400017	0.454844	0.332551	0	inf	0	16	5.32082	10
17	p13.1	GSG1L2	NM_001310219	9705702	9725388	0.429098	0.430067	PANCAN	17p	amp	tel	n	1	n	0.95	9114837	10228815	0.400017	0.454844	0.332551	0	inf	0	16	5.32082	10
17	p13.1	GLP2R	NM_004246	9728867	9795420	0.430238	0.433513	PANCAN	17p	amp	tel	n	1	n	0.95	9114837	10228815	0.400017	0.454844	0.332551	0	inf	0	16	5.32082	10
17	p13.1	RCVRN	NM_002903	9801026	9808684	0.433789	0.434166	PANCAN	17p	amp	tel	n	1	n	0.95	9114837	10228815	0.400017	0.454844	0.332551	0	inf	0	16	5.32082	10
17	p13.1	GAS7	NM_201433	9813925	10101868	0.434424	0.448596	PANCAN	17p	amp	tel	n	1	n	0.95	9114837	10228815	0.400017	0.454844	0.332551	0	inf	0	16	5.32082	10
17	p13.1	MYH13	NM_003802	10204182	10276322	0.453631	0.457182	PANCAN	17p	amp	tel	n	1	n	0.95	9114837	10228815	0.400017	0.454844	0.332551	0	inf	0	16	5.32082	10
8	p22	PSD3	NM_015310	18384812	18871196	0.419871	0.431365	PANCAN	8p	amp	tel	n	1	n	0.95	18780426	19669367	0.42922	0.450228	0.318205	0	inf	0	16	5.09128	4
8	p21.3	LOC100128993	NR_038919	19041185	19103032	0.435383	0.436844	PANCAN	8p	amp	tel	n	1	n	0.95	18780426	19669367	0.42922	0.450228	0.318205	0	inf	0	16	5.09128	4
8	p21.3	SH2D4A	NM_022071	19171080	19253729	0.438452	0.440405	PANCAN	8p	amp	tel	n	1	n	0.95	18780426	19669367	0.42922	0.450228	0.318205	0	inf	0	16	5.09128	4
8	p21.3	CSGALNACT1	NM_001354477	19261671	19615540	0.440593	0.448956	PANCAN	8p	amp	tel	n	1	n	0.95	18780426	19669367	0.42922	0.450228	0.318205	0	inf	0	16	5.09128	4
5	q12.3	LINC02229	NR_105001	65803372	65807432	0.879614	0.879583	PANCAN	5q	del	tel	p	1	p	0.95	65575131	66927830	0.87098	0.881367	0.31201	0	inf	0	16	4.99216	4
5	q12.3	MAST4	NM_001164664	65892175	66465423	0.878932	0.874531	PANCAN	5q	del	tel	p	1	p	0.95	65575131	66927830	0.87098	0.881367	0.31201	0	inf	0	16	4.99216	4
5	q12.3	MAST4-AS1	NR_111908	66297445	66299982	0.875821	0.875801	PANCAN	5q	del	tel	p	1	p	0.95	65575131	66927830	0.87098	0.881367	0.31201	0	inf	0	16	4.99216	4
5	q12.3	CD180	NM_005582	66478103	66492617	0.874433	0.874322	PANCAN	5q	del	tel	p	1	p	0.95	65575131	66927830	0.87098	0.881367	0.31201	0	inf	0	16	4.99216	4
15	q14	THBS1	NM_003246	39873279	39891121	0.793014	0.792786	PANCAN	15	amp	tel	n	2	n-rn	0.95	39687126	42852310	0.754917	0.795395	0.310728	0	inf	0	16	4.97164	77
15	q14	FSIP1	NM_001324338	39892231	40075039	0.792772	0.790434	PANCAN	15	amp	tel	n	2	n-rn	0.95	39687126	42852310	0.754917	0.795395	0.310728	0	inf	0	16	4.97164	77
15	q14	LOC105370941	NR_135665	40075106	40077817	0.790433	0.790398	PANCAN	15	amp	tel	n	2	n-rn	0.95	39687126	42852310	0.754917	0.795395	0.310728	0	inf	0	16	4.97164	77
15	q15.1	GPR176	NM_001271854	40091222	40213093	0.790227	0.788669	PANCAN	15	amp	tel	n	2	n-rn	0.95	39687126	42852310	0.754917	0.795395	0.310728	0	inf	0	16	4.97164	77
15	q15.1	EIF2AK4	NM_001013703	40226324	40327797	0.788499	0.787202	PANCAN	15	amp	tel	n	2	n-rn	0.95	39687126	42852310	0.754917	0.795395	0.310728	0	inf	0	16	4.97164	77
15	q15.1	SRP14	NM_001309434	40327890	40331403	0.7872	0.787156	PANCAN	15	amp	tel	n	2	n-rn	0.95	39687126	42852310	0.754917	0.795395	0.310728	0	inf	0	16	4.97164	77
15	q15.1	SRP14-AS1	NR_040059	40331511	40359710	0.787154	0.786794	PANCAN	15	amp	tel	n	2	n-rn	0.95	39687126	42852310	0.754917	0.795395	0.310728	0	inf	0	16	4.97164	77
15	q15.1	BMF	NM_001003943	40380090	40401085	0.786533	0.786264	PANCAN	15	amp	tel	n	2	n-rn	0.95	39687126	42852310	0.754917	0.795395	0.310728	0	inf	0	16	4.97164	77
15	q15.1	BUB1B	NM_001211	40453209	40513337	0.785598	0.784829	PANCAN	15	amp	tel	n	2	n-rn	0.95	39687126	42852310	0.754917	0.795395	0.310728	0	inf	0	16	4.97164	77
15	q15.1	BUB1B-PAK6	NM_001128628	40509628	40569688	0.784876	0.784108	PANCAN	15	amp	tel	n	2	n-rn	0.95	39687126	42852310	0.754917	0.795395	0.310728	0	inf	0	16	4.97164	77
15	q15.1	PAK6	NM_001276718	40531291	40569688	0.784599	0.784108	PANCAN	15	amp	tel	n	2	n-rn	0.95	39687126	42852310	0.754917	0.795395	0.310728	0	inf	0	16	4.97164	77
15	q15.1	C15orf56	NM_001039905	40542865	40545110	0.784451	0.784423	PANCAN	15	amp	tel	n	2	n-rn	0.95	39687126	42852310	0.754917	0.795395	0.310728	0	inf	0	16	4.97164	77
15	q15.1	ANKRD63	NM_001190479	40570572	40574787	0.784097	0.784043	PANCAN	15	amp	tel	n	2	n-rn	0.95	39687126	42852310	0.754917	0.795395	0.310728	0	inf	0	16	4.97164	77
15	q15.1	PLCB2	NM_004573	40580097	40600174	0.783975	0.783718	PANCAN	15	amp	tel	n	2	n-rn	0.95	39687126	42852310	0.754917	0.795395	0.310728	0	inf	0	16	4.97164	77
15	q15.1	INAFM2	NM_001301268	40616256	40618916	0.783513	0.783479	PANCAN	15	amp	tel	n	2	n-rn	0.95	39687126	42852310	0.754917	0.795395	0.310728	0	inf	0	16	4.97164	77
15	q15.1	CCDC9B	NM_207380	40623652	40633168	0.783418	0.783296	PANCAN	15	amp	tel	n	2	n-rn	0.95	39687126	42852310	0.754917	0.795395	0.310728	0	inf	0	16	4.97164	77
15	q15.1	PHGR1	NM_001145643	40643233	40648634	0.783168	0.783099	PANCAN	15	amp	tel	n	2	n-rn	0.95	39687126	42852310	0.754917	0.795395	0.310728	0	inf	0	16	4.97164	77
15	q15.1	DISP2	NM_033510	40650435	40663257	0.783076	0.782912	PANCAN	15	amp	tel	n	2	n-rn	0.95	39687126	42852310	0.754917	0.795395	0.310728	0	inf	0	16	4.97164	77
15	q15.1	KNSTRN	NM_001142762	40674921	40686489	0.782763	0.782615	PANCAN	15	amp	tel	n	2	n-rn	0.95	39687126	42852310	0.754917	0.795395	0.310728	0	inf	0	16	4.97164	77
15	q15.1	IVD	NM_001354598	40697685	40728146	0.782471	0.782082	PANCAN	15	amp	tel	n	2	n-rn	0.95	39687126	42852310	0.754917	0.795395	0.310728	0	inf	0	16	4.97164	77
15	q15.1	BAHD1	NM_001301132	40731919	40760441	0.782034	0.781669	PANCAN	15	amp	tel	n	2	n-rn	0.95	39687126	42852310	0.754917	0.795395	0.310728	0	inf	0	16	4.97164	77
15	q15.1	CHST14	NM_130468	40763159	40765357	0.781634	0.781606	PANCAN	15	amp	tel	n	2	n-rn	0.95	39687126	42852310	0.754917	0.795395	0.310728	0	inf	0	16	4.97164	77
15	q15.1	CCDC32	NM_001289132	40823539	40857256	0.780862	0.780431	PANCAN	15	amp	tel	n	2	n-rn	0.95	39687126	42852310	0.754917	0.795395	0.310728	0	inf	0	16	4.97164	77
15	q15.1	MRPL42P5	NR_002208	40824082	40824749	0.780855	0.780846	PANCAN	15	amp	tel	n	2	n-rn	0.95	39687126	42852310	0.754917	0.795395	0.310728	0	inf	0	16	4.97164	77
15	q15.1	RPUSD2	NM_152260	40861491	40866893	0.780377	0.780308	PANCAN	15	amp	tel	n	2	n-rn	0.95	39687126	42852310	0.754917	0.795395	0.310728	0	inf	0	16	4.97164	77
15	q15.1	KNL1	NM_170589	40886446	40954881	0.780057	0.779182	PANCAN	15	amp	tel	n	2	n-rn	0.95	39687126	42852310	0.754917	0.795395	0.310728	0	inf	0	16	4.97164	77
15	q15.1	RAD51-AS1	NR_040058	40985952	40987303	0.778785	0.778768	PANCAN	15	amp	tel	n	2	n-rn	0.95	39687126	42852310	0.754917	0.795395	0.310728	0	inf	0	16	4.97164	77
15	q15.1	RAD51	NM_002875	40987326	41024356	0.778767	0.778294	PANCAN	15	amp	tel	n	2	n-rn	0.95	39687126	42852310	0.754917	0.795395	0.310728	0	inf	0	16	4.97164	77
15	q15.1	RMDN3	NM_001323895	41028081	41047534	0.778246	0.777997	PANCAN	15	amp	tel	n	2	n-rn	0.95	39687126	42852310	0.754917	0.795395	0.310728	0	inf	0	16	4.97164	77
15	q15.1	GCHFR	NM_005258	41056284	41059911	0.777886	0.777839	PANCAN	15	amp	tel	n	2	n-rn	0.95	39687126	42852310	0.754917	0.795395	0.310728	0	inf	0	16	4.97164	77
15	q15.1	DNAJC17	NM_018163	41060066	41099676	0.777837	0.777331	PANCAN	15	amp	tel	n	2	n-rn	0.95	39687126	42852310	0.754917	0.795395	0.310728	0	inf	0	16	4.97164	77
15	q15.1	C15orf62	NM_001130448	41062158	41064648	0.77781	0.777779	PANCAN	15	amp	tel	n	2	n-rn	0.95	39687126	42852310	0.754917	0.795395	0.310728	0	inf	0	16	4.97164	77
15	q15.1	ZFYVE19	NM_001258421	41099273	41106767	0.777336	0.77724	PANCAN	15	amp	tel	n	2	n-rn	0.95	39687126	42852310	0.754917	0.795395	0.310728	0	inf	0	16	4.97164	77
15	q15.1	PPP1R14D	NM_017726	41107642	41120907	0.777229	0.777059	PANCAN	15	amp	tel	n	2	n-rn	0.95	39687126	42852310	0.754917	0.795395	0.310728	0	inf	0	16	4.97164	77
15	q15.1	SPINT1-AS1	NR_146466	41128190	41136722	0.776966	0.776857	PANCAN	15	amp	tel	n	2	n-rn	0.95	39687126	42852310	0.754917	0.795395	0.310728	0	inf	0	16	4.97164	77
15	q15.1	SPINT1	NM_003710	41136245	41149853	0.776863	0.776689	PANCAN	15	amp	tel	n	2	n-rn	0.95	39687126	42852310	0.754917	0.795395	0.310728	0	inf	0	16	4.97164	77
15	q15.1	RHOV	NM_133639	41164411	41166487	0.776503	0.776476	PANCAN	15	amp	tel	n	2	n-rn	0.95	39687126	42852310	0.754917	0.795395	0.310728	0	inf	0	16	4.97164	77
15	q15.1	VPS18	NM_020857	41186627	41196173	0.776219	0.776097	PANCAN	15	amp	tel	n	2	n-rn	0.95	39687126	42852310	0.754917	0.795395	0.310728	0	inf	0	16	4.97164	77
15	q15.1	LOC105370943	NR_135836	41199006	41201549	0.77606	0.776028	PANCAN	15	amp	tel	n	2	n-rn	0.95	39687126	42852310	0.754917	0.795395	0.310728	0	inf	0	16	4.97164	77
15	q15.1	DLL4	NM_019074	41221530	41231258	0.775772	0.775648	PANCAN	15	amp	tel	n	2	n-rn	0.95	39687126	42852310	0.754917	0.795395	0.310728	0	inf	0	16	4.97164	77
15	q15.1	CHAC1	NM_001142776	41245668	41248717	0.775464	0.775425	PANCAN	15	amp	tel	n	2	n-rn	0.95	39687126	42852310	0.754917	0.795395	0.310728	0	inf	0	16	4.97164	77
15	q15.1	INO80	NR_104038	41271078	41408444	0.775139	0.773382	PANCAN	15	amp	tel	n	2	n-rn	0.95	39687126	42852310	0.754917	0.795395	0.310728	0	inf	0	16	4.97164	77
15	q15.1	EXD1	NM_152596	41474930	41522955	0.772532	0.771918	PANCAN	15	amp	tel	n	2	n-rn	0.95	39687126	42852310	0.754917	0.795395	0.310728	0	inf	0	16	4.97164	77
15	q15.1	CHP1	NM_007236	41523436	41574083	0.771911	0.771264	PANCAN	15	amp	tel	n	2	n-rn	0.95	39687126	42852310	0.754917	0.795395	0.310728	0	inf	0	16	4.97164	77
15	q15.1	OIP5-AS1	NR_152821	41577539	41605536	0.77122	0.770862	PANCAN	15	amp	tel	n	2	n-rn	0.95	39687126	42852310	0.754917	0.795395	0.310728	0	inf	0	16	4.97164	77
15	q15.1	OIP5	NM_001317860	41601465	41624819	0.770914	0.770615	PANCAN	15	amp	tel	n	2	n-rn	0.95	39687126	42852310	0.754917	0.795395	0.310728	0	inf	0	16	4.97164	77
15	q15.1	NUSAP1	NM_001301136	41624891	41673248	0.770614	0.769996	PANCAN	15	amp	tel	n	2	n-rn	0.95	39687126	42852310	0.754917	0.795395	0.310728	0	inf	0	16	4.97164	77
15	q15.1	NDUFAF1	NR_045620	41679546	41694658	0.769915	0.769722	PANCAN	15	amp	tel	n	2	n-rn	0.95	39687126	42852310	0.754917	0.795395	0.310728	0	inf	0	16	4.97164	77
15	q15.1	RTF1	NM_015138	41709301	41775761	0.769535	0.768685	PANCAN	15	amp	tel	n	2	n-rn	0.95	39687126	42852310	0.754917	0.795395	0.310728	0	inf	0	16	4.97164	77
15	q15.1	ITPKA	NM_002220	41786055	41795757	0.768553	0.768429	PANCAN	15	amp	tel	n	2	n-rn	0.95	39687126	42852310	0.754917	0.795395	0.310728	0	inf	0	16	4.97164	77
15	q15.1	LTK	NM_001135685	41795839	41806085	0.768428	0.768297	PANCAN	15	amp	tel	n	2	n-rn	0.95	39687126	42852310	0.754917	0.795395	0.310728	0	inf	0	16	4.97164	77
15	q15.1	RPAP1	NM_015540	41809374	41836475	0.768255	0.767908	PANCAN	15	amp	tel	n	2	n-rn	0.95	39687126	42852310	0.754917	0.795395	0.310728	0	inf	0	16	4.97164	77
15	q15.1	TYRO3	NM_006293	41851219	41871536	0.76772	0.76746	PANCAN	15	amp	tel	n	2	n-rn	0.95	39687126	42852310	0.754917	0.795395	0.310728	0	inf	0	16	4.97164	77
15	q15.1	MGA	NM_001164273	41952609	42062141	0.766423	0.765022	PANCAN	15	amp	tel	n	2	n-rn	0.95	39687126	42852310	0.754917	0.795395	0.310728	0	inf	0	16	4.97164	77
15	q15.1	MIR626	NR_030356	41983782	41983876	0.766024	0.766023	PANCAN	15	amp	tel	n	2	n-rn	0.95	39687126	42852310	0.754917	0.795395	0.310728	0	inf	0	16	4.97164	77
15	q15.1	MAPKBP1	NM_001265611	42066631	42120053	0.764965	0.764282	PANCAN	15	amp	tel	n	2	n-rn	0.95	39687126	42852310	0.754917	0.795395	0.310728	0	inf	0	16	4.97164	77
15	q15.1	JMJD7	NM_001114632	42120282	42129785	0.764279	0.764157	PANCAN	15	amp	tel	n	2	n-rn	0.95	39687126	42852310	0.754917	0.795395	0.310728	0	inf	0	16	4.97164	77
15	q15.1	JMJD7-PLA2G4B	NM_001198588	42120282	42140346	0.764279	0.764022	PANCAN	15	amp	tel	n	2	n-rn	0.95	39687126	42852310	0.754917	0.795395	0.310728	0	inf	0	16	4.97164	77
15	q15.1	PLA2G4B	NM_001114633	42131010	42140346	0.764142	0.764022	PANCAN	15	amp	tel	n	2	n-rn	0.95	39687126	42852310	0.754917	0.795395	0.310728	0	inf	0	16	4.97164	77
15	q15.1	SPTBN5	NM_016642	42140343	42186275	0.764022	0.763435	PANCAN	15	amp	tel	n	2	n-rn	0.95	39687126	42852310	0.754917	0.795395	0.310728	0	inf	0	16	4.97164	77
15	q15.1	MIR4310	NR_036195	42158692	42158749	0.763788	0.763787	PANCAN	15	amp	tel	n	2	n-rn	0.95	39687126	42852310	0.754917	0.795395	0.310728	0	inf	0	16	4.97164	77
15	q15.1	LOC105370792	NR_135681	42184974	42191013	0.763452	0.763374	PANCAN	15	amp	tel	n	2	n-rn	0.95	39687126	42852310	0.754917	0.795395	0.310728	0	inf	0	16	4.97164	77
15	q15.1	EHD4	NM_139265	42191638	42264755	0.763366	0.762431	PANCAN	15	amp	tel	n	2	n-rn	0.95	39687126	42852310	0.754917	0.795395	0.310728	0	inf	0	16	4.97164	77
15	q15.1	EHD4-AS1	NR_120332	42213614	42221484	0.763085	0.762985	PANCAN	15	amp	tel	n	2	n-rn	0.95	39687126	42852310	0.754917	0.795395	0.310728	0	inf	0	16	4.97164	77
15	q15.1	PLA2G4E-AS1	NR_120334	42264960	42291292	0.762429	0.762092	PANCAN	15	amp	tel	n	2	n-rn	0.95	39687126	42852310	0.754917	0.795395	0.310728	0	inf	0	16	4.97164	77
15	q15.1	PLA2G4E	NM_001206670	42273779	42342901	0.762316	0.761432	PANCAN	15	amp	tel	n	2	n-rn	0.95	39687126	42852310	0.754917	0.795395	0.310728	0	inf	0	16	4.97164	77
15	q15.1	PLA2G4D	NM_178034	42359880	42386752	0.761215	0.760871	PANCAN	15	amp	tel	n	2	n-rn	0.95	39687126	42852310	0.754917	0.795395	0.310728	0	inf	0	16	4.97164	77
15	q15.1	PLA2G4F	NR_033151	42433331	42448839	0.760275	0.760077	PANCAN	15	amp	tel	n	2	n-rn	0.95	39687126	42852310	0.754917	0.795395	0.310728	0	inf	0	16	4.97164	77
15	q15.1	VPS39	NM_001301138	42450898	42500524	0.760051	0.759416	PANCAN	15	amp	tel	n	2	n-rn	0.95	39687126	42852310	0.754917	0.795395	0.310728	0	inf	0	16	4.97164	77
15	q15.1	MIR627	NR_030357	42491767	42491864	0.759528	0.759527	PANCAN	15	amp	tel	n	2	n-rn	0.95	39687126	42852310	0.754917	0.795395	0.310728	0	inf	0	16	4.97164	77
15	q15.1	TMEM87A	NM_001286487	42502649	42565782	0.759389	0.758582	PANCAN	15	amp	tel	n	2	n-rn	0.95	39687126	42852310	0.754917	0.795395	0.310728	0	inf	0	16	4.97164	77
15	q15.1	GANC	NM_198141	42566365	42645864	0.758574	0.757558	PANCAN	15	amp	tel	n	2	n-rn	0.95	39687126	42852310	0.754917	0.795395	0.310728	0	inf	0	16	4.97164	77
15	q15.1	CAPN3	NM_173087	42651697	42704515	0.757483	0.756808	PANCAN	15	amp	tel	n	2	n-rn	0.95	39687126	42852310	0.754917	0.795395	0.310728	0	inf	0	16	4.97164	77
15	q15.1	ZNF106	NM_001284307	42704634	42783395	0.756806	0.755799	PANCAN	15	amp	tel	n	2	n-rn	0.95	39687126	42852310	0.754917	0.795395	0.310728	0	inf	0	16	4.97164	77
15	q15.2	SNAP23	NM_003825	42787503	42825259	0.755746	0.755263	PANCAN	15	amp	tel	n	2	n-rn	0.95	39687126	42852310	0.754917	0.795395	0.310728	0	inf	0	16	4.97164	77
15	q15.2	LRRC57	NM_153260	42834719	42841002	0.755142	0.755062	PANCAN	15	amp	tel	n	2	n-rn	0.95	39687126	42852310	0.754917	0.795395	0.310728	0	inf	0	16	4.97164	77
15	q15.2	HAUS2	NM_001323632	42841010	42862190	0.755062	0.754791	PANCAN	15	amp	tel	n	2	n-rn	0.95	39687126	42852310	0.754917	0.795395	0.310728	0	inf	0	16	4.97164	77
17	p13.1	ACAP1	NM_014716	7239847	7254793	0.307736	0.308471	PANCAN	17p	del	tel	p	2	p-lp	0.95	7253001	7583290	0.308383	0.324639	0.308226	0	inf	0	16	4.93162	34
17	p13.1	KCTD11	NM_001002914	7255207	7258262	0.308492	0.308642	PANCAN	17p	del	tel	p	2	p-lp	0.95	7253001	7583290	0.308383	0.324639	0.308226	0	inf	0	16	4.93162	34
17	p13.1	TMEM95	NM_001320435	7258454	7260538	0.308651	0.308754	PANCAN	17p	del	tel	p	2	p-lp	0.95	7253001	7583290	0.308383	0.324639	0.308226	0	inf	0	16	4.93162	34
17	p13.1	TNK1	NM_001251902	7284292	7293092	0.309923	0.310356	PANCAN	17p	del	tel	p	2	p-lp	0.95	7253001	7583290	0.308383	0.324639	0.308226	0	inf	0	16	4.93162	34
17	p13.1	PLSCR3	NM_020360	7293046	7298162	0.310354	0.310606	PANCAN	17p	del	tel	p	2	p-lp	0.95	7253001	7583290	0.308383	0.324639	0.308226	0	inf	0	16	4.93162	34
17	p13.1	TMEM256-PLSCR3	NR_037719	7293046	7307450	0.310354	0.311063	PANCAN	17p	del	tel	p	2	p-lp	0.95	7253001	7583290	0.308383	0.324639	0.308226	0	inf	0	16	4.93162	34
17	p13.1	TMEM256	NM_152766	7306292	7307457	0.311006	0.311063	PANCAN	17p	del	tel	p	2	p-lp	0.95	7253001	7583290	0.308383	0.324639	0.308226	0	inf	0	16	4.93162	34
17	p13.1	NLGN2	NM_020795	7311501	7323183	0.311262	0.311837	PANCAN	17p	del	tel	p	2	p-lp	0.95	7253001	7583290	0.308383	0.324639	0.308226	0	inf	0	16	4.93162	34
17	p13.1	SPEM1	NM_199339	7323678	7324951	0.311862	0.311924	PANCAN	17p	del	tel	p	2	p-lp	0.95	7253001	7583290	0.308383	0.324639	0.308226	0	inf	0	16	4.93162	34
17	p13.1	SPEM2	NM_175734	7328934	7330886	0.31212	0.312216	PANCAN	17p	del	tel	p	2	p-lp	0.95	7253001	7583290	0.308383	0.324639	0.308226	0	inf	0	16	4.93162	34
17	p13.1	TMEM102	NM_178518	7338761	7340998	0.312604	0.312714	PANCAN	17p	del	tel	p	2	p-lp	0.95	7253001	7583290	0.308383	0.324639	0.308226	0	inf	0	16	4.93162	34
17	p13.1	FGF11	NR_130156	7341591	7348251	0.312743	0.313071	PANCAN	17p	del	tel	p	2	p-lp	0.95	7253001	7583290	0.308383	0.324639	0.308226	0	inf	0	16	4.93162	34
17	p13.1	CHRNB1	NM_000747	7348405	7360932	0.313079	0.313695	PANCAN	17p	del	tel	p	2	p-lp	0.95	7253001	7583290	0.308383	0.324639	0.308226	0	inf	0	16	4.93162	34
17	p13.1	ZBTB4	NM_020899	7362684	7387568	0.313781	0.315006	PANCAN	17p	del	tel	p	2	p-lp	0.95	7253001	7583290	0.308383	0.324639	0.308226	0	inf	0	16	4.93162	34
17	p13.1	SLC35G6	NM_001102614	7384720	7386383	0.314866	0.314948	PANCAN	17p	del	tel	p	2	p-lp	0.95	7253001	7583290	0.308383	0.324639	0.308226	0	inf	0	16	4.93162	34
17	p13.1	POLR2A	NM_000937	7387697	7417935	0.315012	0.316501	PANCAN	17p	del	tel	p	2	p-lp	0.95	7253001	7583290	0.308383	0.324639	0.308226	0	inf	0	16	4.93162	34
17	p13.1	TNFSF12	NM_003809	7452374	7461207	0.318196	0.31863	PANCAN	17p	del	tel	p	2	p-lp	0.95	7253001	7583290	0.308383	0.324639	0.308226	0	inf	0	16	4.93162	34
17	p13.1	TNFSF12-TNFSF13	NM_172089	7452374	7464925	0.318196	0.318813	PANCAN	17p	del	tel	p	2	p-lp	0.95	7253001	7583290	0.308383	0.324639	0.308226	0	inf	0	16	4.93162	34
17	p13.1	TNFSF13	NM_003808	7461608	7464925	0.31865	0.318813	PANCAN	17p	del	tel	p	2	p-lp	0.95	7253001	7583290	0.308383	0.324639	0.308226	0	inf	0	16	4.93162	34
17	p13.1	SENP3	NM_015670	7465308	7475287	0.318832	0.319323	PANCAN	17p	del	tel	p	2	p-lp	0.95	7253001	7583290	0.308383	0.324639	0.308226	0	inf	0	16	4.93162	34
17	p13.1	SENP3-EIF4A1	NR_037926	7465308	7482324	0.318832	0.31967	PANCAN	17p	del	tel	p	2	p-lp	0.95	7253001	7583290	0.308383	0.324639	0.308226	0	inf	0	16	4.93162	34
17	p13.1	EIF4A1	NM_001204510	7476023	7482324	0.31936	0.31967	PANCAN	17p	del	tel	p	2	p-lp	0.95	7253001	7583290	0.308383	0.324639	0.308226	0	inf	0	16	4.93162	34
17	p13.1	SNORA48	NR_002918	7478030	7478165	0.319458	0.319465	PANCAN	17p	del	tel	p	2	p-lp	0.95	7253001	7583290	0.308383	0.324639	0.308226	0	inf	0	16	4.93162	34
17	p13.1	SNORD10	NR_002604	7480128	7480276	0.319562	0.319569	PANCAN	17p	del	tel	p	2	p-lp	0.95	7253001	7583290	0.308383	0.324639	0.308226	0	inf	0	16	4.93162	34
17	p13.1	SNORA67	NR_002912	7481272	7481409	0.319618	0.319625	PANCAN	17p	del	tel	p	2	p-lp	0.95	7253001	7583290	0.308383	0.324639	0.308226	0	inf	0	16	4.93162	34
17	p13.1	CD68	NM_001251	7482804	7485429	0.319693	0.319823	PANCAN	17p	del	tel	p	2	p-lp	0.95	7253001	7583290	0.308383	0.324639	0.308226	0	inf	0	16	4.93162	34
17	p13.1	LOC100996842	NR_136401	7485284	7487397	0.319815	0.319919	PANCAN	17p	del	tel	p	2	p-lp	0.95	7253001	7583290	0.308383	0.324639	0.308226	0	inf	0	16	4.93162	34
17	p13.1	MPDU1	NR_024603	7486964	7491527	0.319898	0.320123	PANCAN	17p	del	tel	p	2	p-lp	0.95	7253001	7583290	0.308383	0.324639	0.308226	0	inf	0	16	4.93162	34
17	p13.1	SOX15	NM_006942	7491497	7493488	0.320121	0.320219	PANCAN	17p	del	tel	p	2	p-lp	0.95	7253001	7583290	0.308383	0.324639	0.308226	0	inf	0	16	4.93162	34
17	p13.1	FXR2	NM_004860	7494547	7518215	0.320271	0.321436	PANCAN	17p	del	tel	p	2	p-lp	0.95	7253001	7583290	0.308383	0.324639	0.308226	0	inf	0	16	4.93162	34
17	p13.1	SHBG	NM_001289114	7517381	7536701	0.321395	0.322346	PANCAN	17p	del	tel	p	2	p-lp	0.95	7253001	7583290	0.308383	0.324639	0.308226	0	inf	0	16	4.93162	34
17	p13.1	SAT2	NM_133491	7529551	7531194	0.321994	0.322075	PANCAN	17p	del	tel	p	2	p-lp	0.95	7253001	7583290	0.308383	0.324639	0.308226	0	inf	0	16	4.93162	34
17	p13.1	ATP1B2	NM_001303263	7549944	7561089	0.322998	0.323546	PANCAN	17p	del	tel	p	2	p-lp	0.95	7253001	7583290	0.308383	0.324639	0.308226	0	inf	0	16	4.93162	34
17	p13.1	TP53	NM_001276696	7571719	7590868	0.324069	0.325012	PANCAN	17p	del	tel	p	2	p-lp	0.95	7253001	7583290	0.308383	0.324639	0.308226	0	inf	0	16	4.93162	34
8	q24.21	CASC11	NR_117102	128712852	128746213	0.168962	0.16862	PANCAN	8q	amp	tel	p	2	p-lp	0.95	128606666	130425528	0.151445	0.170048	0.289731	0	inf	0	16	4.6357	13
8	q24.21	MYC	NM_001354870	128747679	128755197	0.168605	0.168529	PANCAN	8q	amp	tel	p	2	p-lp	0.95	128606666	130425528	0.151445	0.170048	0.289731	0	inf	0	16	4.6357	13
8	q24.21	PVT1	NR_003367	128806778	129113499	0.168001	0.164864	PANCAN	8q	amp	tel	p	2	p-lp	0.95	128606666	130425528	0.151445	0.170048	0.289731	0	inf	0	16	4.6357	13
8	q24.21	MIR1204	NR_031609	128808207	128808274	0.167986	0.167986	PANCAN	8q	amp	tel	p	2	p-lp	0.95	128606666	130425528	0.151445	0.170048	0.289731	0	inf	0	16	4.6357	13
8	q24.21	TMEM75	NR_103558	128958804	128960969	0.166446	0.166424	PANCAN	8q	amp	tel	p	2	p-lp	0.95	128606666	130425528	0.151445	0.170048	0.289731	0	inf	0	16	4.6357	13
8	q24.21	MIR1205	NR_031610	128972878	128972941	0.166302	0.166301	PANCAN	8q	amp	tel	p	2	p-lp	0.95	128606666	130425528	0.151445	0.170048	0.289731	0	inf	0	16	4.6357	13
8	q24.21	MIR1206	NR_031611	129021143	129021202	0.165808	0.165808	PANCAN	8q	amp	tel	p	2	p-lp	0.95	128606666	130425528	0.151445	0.170048	0.289731	0	inf	0	16	4.6357	13
8	q24.21	MIR1207	NR_031612	129061397	129061484	0.165397	0.165396	PANCAN	8q	amp	tel	p	2	p-lp	0.95	128606666	130425528	0.151445	0.170048	0.289731	0	inf	0	16	4.6357	13
8	q24.21	MIR1208	NR_031613	129162361	129162434	0.164364	0.164363	PANCAN	8q	amp	tel	p	2	p-lp	0.95	128606666	130425528	0.151445	0.170048	0.289731	0	inf	0	16	4.6357	13
8	q24.21	LINC00824	NR_121672	129417515	129576925	0.161754	0.160124	PANCAN	8q	amp	tel	p	2	p-lp	0.95	128606666	130425528	0.151445	0.170048	0.289731	0	inf	0	16	4.6357	13
8	q24.21	LINC00976	NR_145483	129965124	129978247	0.156154	0.156019	PANCAN	8q	amp	tel	p	2	p-lp	0.95	128606666	130425528	0.151445	0.170048	0.289731	0	inf	0	16	4.6357	13
8	q24.21	LINC00977	NR_033916	130228712	130253486	0.153458	0.153204	PANCAN	8q	amp	tel	p	2	p-lp	0.95	128606666	130425528	0.151445	0.170048	0.289731	0	inf	0	16	4.6357	13
8	q24.21	CCDC26	NR_130917	130363939	130692485	0.152074	0.148714	PANCAN	8q	amp	tel	p	2	p-lp	0.95	128606666	130425528	0.151445	0.170048	0.289731	0	inf	0	16	4.6357	13
1	p34.2	RIMS3	NM_014747	41086351	41131324	0.322804	0.323187	PANCAN	1p	del	tel	n	1	n	0.95	41039049	41756048	0.322401	0.328513	0.27524	0	inf	0	16	4.40383	11
1	p34.2	NFYC-AS1	NR_024567	41154751	41157933	0.323387	0.323414	PANCAN	1p	del	tel	n	1	n	0.95	41039049	41756048	0.322401	0.328513	0.27524	0	inf	0	16	4.40383	11
1	p34.2	NFYC	NM_014223	41157241	41237275	0.323408	0.324091	PANCAN	1p	del	tel	n	1	n	0.95	41039049	41756048	0.322401	0.328513	0.27524	0	inf	0	16	4.40383	11
1	p34.2	MIR30E	NR_029846	41220026	41220118	0.323944	0.323944	PANCAN	1p	del	tel	n	1	n	0.95	41039049	41756048	0.322401	0.328513	0.27524	0	inf	0	16	4.40383	11
1	p34.2	MIR30C1	NR_029833	41222955	41223044	0.323969	0.323969	PANCAN	1p	del	tel	n	1	n	0.95	41039049	41756048	0.322401	0.328513	0.27524	0	inf	0	16	4.40383	11
1	p34.2	KCNQ4	NM_172163	41249683	41306124	0.324196	0.324678	PANCAN	1p	del	tel	n	1	n	0.95	41039049	41756048	0.322401	0.328513	0.27524	0	inf	0	16	4.40383	11
1	p34.2	CITED4	NM_133467	41326727	41328018	0.324853	0.324864	PANCAN	1p	del	tel	n	1	n	0.95	41039049	41756048	0.322401	0.328513	0.27524	0	inf	0	16	4.40383	11
1	p34.2	CTPS1	NR_125440	41444970	41478237	0.325861	0.326145	PANCAN	1p	del	tel	n	1	n	0.95	41039049	41756048	0.322401	0.328513	0.27524	0	inf	0	16	4.40383	11
1	p34.2	SLFNL1-AS1	NR_037868	41480261	41509562	0.326162	0.326412	PANCAN	1p	del	tel	n	1	n	0.95	41039049	41756048	0.322401	0.328513	0.27524	0	inf	0	16	4.40383	11
1	p34.2	SLFNL1	NM_144990	41481268	41487427	0.326171	0.326223	PANCAN	1p	del	tel	n	1	n	0.95	41039049	41756048	0.322401	0.328513	0.27524	0	inf	0	16	4.40383	11
1	p34.2	SCMH1	NM_012236	41492870	41707815	0.326269	0.328102	PANCAN	1p	del	tel	n	1	n	0.95	41039049	41756048	0.322401	0.328513	0.27524	0	inf	0	16	4.40383	11
9	p21.3	IFNW1	NM_002177	21140630	21141900	0.536141	0.536174	PANCAN	9p	del	tel	p	1	p	0.95	21125944	22003260	0.535754	0.558867	0.267985	0	inf	0	16	4.28776	24
9	p21.3	IFNA21	NM_002175	21165635	21166659	0.536799	0.536826	PANCAN	9p	del	tel	p	1	p	0.95	21125944	22003260	0.535754	0.558867	0.267985	0	inf	0	16	4.28776	24
9	p21.3	IFNA4	NM_021068	21186617	21187598	0.537352	0.537378	PANCAN	9p	del	tel	p	1	p	0.95	21125944	22003260	0.535754	0.558867	0.267985	0	inf	0	16	4.28776	24
9	p21.3	IFNA7	NM_021057	21201467	21202204	0.537743	0.537763	PANCAN	9p	del	tel	p	1	p	0.95	21125944	22003260	0.535754	0.558867	0.267985	0	inf	0	16	4.28776	24
9	p21.3	IFNA10	NM_002171	21206179	21207142	0.537868	0.537893	PANCAN	9p	del	tel	p	1	p	0.95	21125944	22003260	0.535754	0.558867	0.267985	0	inf	0	16	4.28776	24
9	p21.3	IFNA16	NM_002173	21216371	21217310	0.538136	0.538161	PANCAN	9p	del	tel	p	1	p	0.95	21125944	22003260	0.535754	0.558867	0.267985	0	inf	0	16	4.28776	24
9	p21.3	IFNA17	NM_021268	21227241	21228221	0.538422	0.538448	PANCAN	9p	del	tel	p	1	p	0.95	21125944	22003260	0.535754	0.558867	0.267985	0	inf	0	16	4.28776	24
9	p21.3	IFNA14	NM_002172	21239200	21239978	0.538738	0.538758	PANCAN	9p	del	tel	p	1	p	0.95	21125944	22003260	0.535754	0.558867	0.267985	0	inf	0	16	4.28776	24
9	p21.3	IFNA22P	NR_036676	21277686	21278562	0.539751	0.539775	PANCAN	9p	del	tel	p	1	p	0.95	21125944	22003260	0.535754	0.558867	0.267985	0	inf	0	16	4.28776	24
9	p21.3	IFNA5	NM_002169	21304612	21305312	0.540461	0.540479	PANCAN	9p	del	tel	p	1	p	0.95	21125944	22003260	0.535754	0.558867	0.267985	0	inf	0	16	4.28776	24
9	p21.3	KLHL9	NM_018847	21329669	21335431	0.541121	0.541273	PANCAN	9p	del	tel	p	1	p	0.95	21125944	22003260	0.535754	0.558867	0.267985	0	inf	0	16	4.28776	24
9	p21.3	IFNA6	NM_021002	21350316	21350886	0.541665	0.54168	PANCAN	9p	del	tel	p	1	p	0.95	21125944	22003260	0.535754	0.558867	0.267985	0	inf	0	16	4.28776	24
9	p21.3	IFNA13	NM_006900	21367370	21368075	0.542114	0.542133	PANCAN	9p	del	tel	p	1	p	0.95	21125944	22003260	0.535754	0.558867	0.267985	0	inf	0	16	4.28776	24
9	p21.3	IFNA2	NM_000605	21384253	21385396	0.542559	0.542589	PANCAN	9p	del	tel	p	1	p	0.95	21125944	22003260	0.535754	0.558867	0.267985	0	inf	0	16	4.28776	24
9	p21.3	IFNA8	NM_002170	21409145	21410184	0.543215	0.543242	PANCAN	9p	del	tel	p	1	p	0.95	21125944	22003260	0.535754	0.558867	0.267985	0	inf	0	16	4.28776	24
9	p21.3	IFNA1	NM_024013	21440452	21441315	0.54404	0.544062	PANCAN	9p	del	tel	p	1	p	0.95	21125944	22003260	0.535754	0.558867	0.267985	0	inf	0	16	4.28776	24
9	p21.3	MIR31HG	NR_027054	21454266	21559797	0.544403	0.547184	PANCAN	9p	del	tel	p	1	p	0.95	21125944	22003260	0.535754	0.558867	0.267985	0	inf	0	16	4.28776	24
9	p21.3	IFNE	NM_176891	21480838	21482312	0.545104	0.545142	PANCAN	9p	del	tel	p	1	p	0.95	21125944	22003260	0.535754	0.558867	0.267985	0	inf	0	16	4.28776	24
9	p21.3	MIR31	NR_029505	21512113	21512184	0.545927	0.545929	PANCAN	9p	del	tel	p	1	p	0.95	21125944	22003260	0.535754	0.558867	0.267985	0	inf	0	16	4.28776	24
9	p21.3	MTAP	NM_002451	21802634	21865969	0.553581	0.55525	PANCAN	9p	del	tel	p	1	p	0.95	21125944	22003260	0.535754	0.558867	0.267985	0	inf	0	16	4.28776	24
9	p21.3	CDKN2A-AS1	NR_024274	21967137	21967753	0.557915	0.557931	PANCAN	9p	del	tel	p	1	p	0.95	21125944	22003260	0.535754	0.558867	0.267985	0	inf	0	16	4.28776	24
9	p21.3	CDKN2A	NM_058195	21967750	21994490	0.557931	0.558636	PANCAN	9p	del	tel	p	1	p	0.95	21125944	22003260	0.535754	0.558867	0.267985	0	inf	0	16	4.28776	24
9	p21.3	CDKN2B-AS1	NR_047534	21994789	22121093	0.558644	0.561971	PANCAN	9p	del	tel	p	1	p	0.95	21125944	22003260	0.535754	0.558867	0.267985	0	inf	0	16	4.28776	24
9	p21.3	CDKN2B	NM_078487	22002901	22009312	0.558857	0.559026	PANCAN	9p	del	tel	p	1	p	0.95	21125944	22003260	0.535754	0.558867	0.267985	0	inf	0	16	4.28776	24
3	p14.3	ERC2	NR_132749	55542338	56502391	0.604143	0.615019	PANCAN	3p	del	tel	p	1	p	0.95	56079214	56536253	0.610225	0.615403	0.266944	0	inf	0	16	4.2711	1
19	p13.2	CACNA1A	NM_023035	13317255	13617274	0.54833	0.560952	PANCAN	19p	del	tel	n	1	n	0.95	13305524	13784368	0.547836	0.567982	0.262089	0	inf	0	16	4.19342	1
2	p23.2	ALK	NM_004304	29415639	30144477	0.326368	0.33459	PANCAN	2p	del	tel	n	1	n	0.95	30120058	31809284	0.334315	0.35337	0.254005	0	inf	0	16	4.06408	12
2	p23.1	YPEL5	NM_001127401	30369749	30383399	0.337131	0.337285	PANCAN	2p	del	tel	n	1	n	0.95	30120058	31809284	0.334315	0.35337	0.254005	0	inf	0	16	4.06408	12
2	p23.1	SNORA10B	NR_145719	30410299	30410432	0.337589	0.33759	PANCAN	2p	del	tel	n	1	n	0.95	30120058	31809284	0.334315	0.35337	0.254005	0	inf	0	16	4.06408	12
2	p23.1	LBH	NM_030915	30454396	30482899	0.338086	0.338408	PANCAN	2p	del	tel	n	1	n	0.95	30120058	31809284	0.334315	0.35337	0.254005	0	inf	0	16	4.06408	12
2	p23.1	LOC285043	NR_122048	30569511	30573024	0.339385	0.339424	PANCAN	2p	del	tel	n	1	n	0.95	30120058	31809284	0.334315	0.35337	0.254005	0	inf	0	16	4.06408	12
2	p23.1	LCLAT1	NM_001304446	30670091	30867091	0.340519	0.342742	PANCAN	2p	del	tel	n	1	n	0.95	30120058	31809284	0.334315	0.35337	0.254005	0	inf	0	16	4.06408	12
2	p23.1	CAPN13	NM_144575	30945637	31030311	0.343628	0.344583	PANCAN	2p	del	tel	n	1	n	0.95	30120058	31809284	0.334315	0.35337	0.254005	0	inf	0	16	4.06408	12
2	p23.1	GALNT14	NM_001253826	31133330	31361592	0.345745	0.34832	PANCAN	2p	del	tel	n	1	n	0.95	30120058	31809284	0.334315	0.35337	0.254005	0	inf	0	16	4.06408	12
2	p23.1	CAPN14	NM_001321270	31395921	31456823	0.348707	0.349394	PANCAN	2p	del	tel	n	1	n	0.95	30120058	31809284	0.334315	0.35337	0.254005	0	inf	0	16	4.06408	12
2	p23.1	EHD3	NM_014600	31456879	31491260	0.349395	0.349783	PANCAN	2p	del	tel	n	1	n	0.95	30120058	31809284	0.334315	0.35337	0.254005	0	inf	0	16	4.06408	12
2	p23.1	XDH	NM_000379	31557187	31637611	0.350527	0.351434	PANCAN	2p	del	tel	n	1	n	0.95	30120058	31809284	0.334315	0.35337	0.254005	0	inf	0	16	4.06408	12
2	p23.1	SRD5A2	NM_000348	31749655	31806040	0.352698	0.353334	PANCAN	2p	del	tel	n	1	n	0.95	30120058	31809284	0.334315	0.35337	0.254005	0	inf	0	16	4.06408	12
1	p36.11	LOC101928728	NR_135804	27018400	27020622	0.202882	0.202901	PANCAN	1p	del	tel	p	2	n-lp	0.95	26902694	27312816	0.201895	0.205391	0.253905	0	inf	0	16	4.06247	10
1	p36.11	ARID1A	NM_006015	27022523	27108601	0.202917	0.203651	PANCAN	1p	del	tel	p	2	n-lp	0.95	26902694	27312816	0.201895	0.205391	0.253905	0	inf	0	16	4.06247	10
1	p36.11	PIGV	NM_017837	27114453	27124894	0.2037	0.203789	PANCAN	1p	del	tel	p	2	n-lp	0.95	26902694	27312816	0.201895	0.205391	0.253905	0	inf	0	16	4.06247	10
1	p36.11	ZDHHC18	NM_032283	27153200	27182211	0.204031	0.204278	PANCAN	1p	del	tel	p	2	n-lp	0.95	26902694	27312816	0.201895	0.205391	0.253905	0	inf	0	16	4.06247	10
1	p36.11	SFN	NM_006142	27189628	27190948	0.204341	0.204353	PANCAN	1p	del	tel	p	2	n-lp	0.95	26902694	27312816	0.201895	0.205391	0.253905	0	inf	0	16	4.06247	10
1	p36.11	GPN2	NM_018066	27205872	27216869	0.20448	0.204573	PANCAN	1p	del	tel	p	2	n-lp	0.95	26902694	27312816	0.201895	0.205391	0.253905	0	inf	0	16	4.06247	10
1	p36.11	GPATCH3	NM_022078	27216978	27226962	0.204574	0.20466	PANCAN	1p	del	tel	p	2	n-lp	0.95	26902694	27312816	0.201895	0.205391	0.253905	0	inf	0	16	4.06247	10
1	p36.11	NR0B2	NM_021969	27237974	27240567	0.204753	0.204775	PANCAN	1p	del	tel	p	2	n-lp	0.95	26902694	27312816	0.201895	0.205391	0.253905	0	inf	0	16	4.06247	10
1	p36.11	NUDC	NM_006600	27248212	27273362	0.204841	0.205055	PANCAN	1p	del	tel	p	2	n-lp	0.95	26902694	27312816	0.201895	0.205391	0.253905	0	inf	0	16	4.06247	10
1	p36.11	KDF1	NM_152365	27276046	27286901	0.205078	0.20517	PANCAN	1p	del	tel	p	2	n-lp	0.95	26902694	27312816	0.201895	0.205391	0.253905	0	inf	0	16	4.06247	10
10	q24.1	RRP12	NM_001145114	99116457	99161127	0.391306	0.390822	PANCAN	10q	amp	tel	n	1	n	0.95	99147935	101004945	0.370841	0.390965	0.251501	0	inf	0	16	4.02402	27
10	q24.1	PGAM1	NM_002629	99185881	99193201	0.390554	0.390475	PANCAN	10q	amp	tel	n	1	n	0.95	99147935	101004945	0.370841	0.390965	0.251501	0	inf	0	16	4.02402	27
10	q24.1	EXOSC1	NM_001318366	99195665	99205774	0.390448	0.390339	PANCAN	10q	amp	tel	n	1	n	0.95	99147935	101004945	0.370841	0.390965	0.251501	0	inf	0	16	4.02402	27
10	q24.1	ZDHHC16	NR_109895	99205887	99217127	0.390337	0.390215	PANCAN	10q	amp	tel	n	1	n	0.95	99147935	101004945	0.370841	0.390965	0.251501	0	inf	0	16	4.02402	27
10	q24.1	MMS19	NM_001289405	99218080	99258551	0.390205	0.389767	PANCAN	10q	amp	tel	n	1	n	0.95	99147935	101004945	0.370841	0.390965	0.251501	0	inf	0	16	4.02402	27
10	q24.1	UBTD1	NM_024954	99258638	99330967	0.389766	0.388982	PANCAN	10q	amp	tel	n	1	n	0.95	99147935	101004945	0.370841	0.390965	0.251501	0	inf	0	16	4.02402	27
10	q24.2	ANKRD2	NM_001346797	99332197	99343653	0.388968	0.388844	PANCAN	10q	amp	tel	n	1	n	0.95	99147935	101004945	0.370841	0.390965	0.251501	0	inf	0	16	4.02402	27
10	q24.2	HOGA1	NM_001134670	99344101	99372555	0.388839	0.388531	PANCAN	10q	amp	tel	n	1	n	0.95	99147935	101004945	0.370841	0.390965	0.251501	0	inf	0	16	4.02402	27
10	q24.2	C10orf62	NM_001009997	99349449	99350691	0.388782	0.388768	PANCAN	10q	amp	tel	n	1	n	0.95	99147935	101004945	0.370841	0.390965	0.251501	0	inf	0	16	4.02402	27
10	q24.2	MORN4	NM_001098831	99374309	99393913	0.388512	0.3883	PANCAN	10q	amp	tel	n	1	n	0.95	99147935	101004945	0.370841	0.390965	0.251501	0	inf	0	16	4.02402	27
10	q24.2	PI4K2A	NM_018425	99400442	99436189	0.388229	0.387842	PANCAN	10q	amp	tel	n	1	n	0.95	99147935	101004945	0.370841	0.390965	0.251501	0	inf	0	16	4.02402	27
10	q24.2	AVPI1	NM_021732	99437180	99447015	0.387831	0.387724	PANCAN	10q	amp	tel	n	1	n	0.95	99147935	101004945	0.370841	0.390965	0.251501	0	inf	0	16	4.02402	27
10	q24.2	MARVELD1	NM_031484	99473464	99477909	0.387438	0.387389	PANCAN	10q	amp	tel	n	1	n	0.95	99147935	101004945	0.370841	0.390965	0.251501	0	inf	0	16	4.02402	27
10	q24.2	ZFYVE27	NM_144588	99496877	99520664	0.387184	0.386926	PANCAN	10q	amp	tel	n	1	n	0.95	99147935	101004945	0.370841	0.390965	0.251501	0	inf	0	16	4.02402	27
10	q24.2	SFRP5	NM_003015	99526507	99531756	0.386863	0.386806	PANCAN	10q	amp	tel	n	1	n	0.95	99147935	101004945	0.370841	0.390965	0.251501	0	inf	0	16	4.02402	27
10	q24.2	LINC00866	NR_108035	99588234	99609555	0.386194	0.385963	PANCAN	10q	amp	tel	n	1	n	0.95	99147935	101004945	0.370841	0.390965	0.251501	0	inf	0	16	4.02402	27
10	q24.2	GOLGA7B	NM_001010917	99609994	99631335	0.385958	0.385727	PANCAN	10q	amp	tel	n	1	n	0.95	99147935	101004945	0.370841	0.390965	0.251501	0	inf	0	16	4.02402	27
10	q24.2	CRTAC1	NM_018058	99624756	99790585	0.385798	0.384001	PANCAN	10q	amp	tel	n	1	n	0.95	99147935	101004945	0.370841	0.390965	0.251501	0	inf	0	16	4.02402	27
10	q24.2	R3HCC1L	NM_138469	99894380	100004654	0.382876	0.381681	PANCAN	10q	amp	tel	n	1	n	0.95	99147935	101004945	0.370841	0.390965	0.251501	0	inf	0	16	4.02402	27
10	q24.2	LOXL4	NM_032211	100007442	100028007	0.381651	0.381428	PANCAN	10q	amp	tel	n	1	n	0.95	99147935	101004945	0.370841	0.390965	0.251501	0	inf	0	16	4.02402	27
10	q24.2	PYROXD2	NM_032709	100143321	100174978	0.380178	0.379835	PANCAN	10q	amp	tel	n	1	n	0.95	99147935	101004945	0.370841	0.390965	0.251501	0	inf	0	16	4.02402	27
10	q24.2	MIR1287	NR_031619	100154974	100155064	0.380052	0.380051	PANCAN	10q	amp	tel	n	1	n	0.95	99147935	101004945	0.370841	0.390965	0.251501	0	inf	0	16	4.02402	27
10	q24.2	HPS1	NM_001311345	100175954	100206720	0.379825	0.379491	PANCAN	10q	amp	tel	n	1	n	0.95	99147935	101004945	0.370841	0.390965	0.251501	0	inf	0	16	4.02402	27
10	q24.2	MIR4685	NR_039833	100191048	100191117	0.379661	0.37966	PANCAN	10q	amp	tel	n	1	n	0.95	99147935	101004945	0.370841	0.390965	0.251501	0	inf	0	16	4.02402	27
10	q24.2	LOC101927278	NR_134451	100206077	100213562	0.379498	0.379417	PANCAN	10q	amp	tel	n	1	n	0.95	99147935	101004945	0.370841	0.390965	0.251501	0	inf	0	16	4.02402	27
10	q24.2	HPSE2	NM_001166245	100216833	100995632	0.379382	0.370942	PANCAN	10q	amp	tel	n	1	n	0.95	99147935	101004945	0.370841	0.390965	0.251501	0	inf	0	16	4.02402	27
10	q24.2	MIR6507	NR_106762	100684255	100684325	0.374316	0.374316	PANCAN	10q	amp	tel	n	1	n	0.95	99147935	101004945	0.370841	0.390965	0.251501	0	inf	0	16	4.02402	27
19	p13.2	ZNF833P	NR_028594	11784812	11797384	0.516143	0.515614	PANCAN	19p	amp	cent	p	1	p	0.95	11753832	19945779	0.172797	0.517446	0.25052	0	inf	0	16	4.00832	268
19	p13.2	ZNF823	NM_017507	11832079	11849824	0.514154	0.513407	PANCAN	19p	amp	cent	p	1	p	0.95	11753832	19945779	0.172797	0.517446	0.25052	0	inf	0	16	4.00832	268
19	p13.2	ZNF441	NM_152355	11877814	11894893	0.51223	0.511511	PANCAN	19p	amp	cent	p	1	p	0.95	11753832	19945779	0.172797	0.517446	0.25052	0	inf	0	16	4.00832	268
19	p13.2	ZNF491	NM_152356	11909390	11919306	0.510901	0.510484	PANCAN	19p	amp	cent	p	1	p	0.95	11753832	19945779	0.172797	0.517446	0.25052	0	inf	0	16	4.00832	268
19	p13.2	ZNF440	NM_152357	11925106	11946016	0.51024	0.50936	PANCAN	19p	amp	cent	p	1	p	0.95	11753832	19945779	0.172797	0.517446	0.25052	0	inf	0	16	4.00832	268
19	p13.2	ZNF439	NM_001348724	11959547	11980306	0.508791	0.507918	PANCAN	19p	amp	cent	p	1	p	0.95	11753832	19945779	0.172797	0.517446	0.25052	0	inf	0	16	4.00832	268
19	p13.2	ZNF69	NM_001321163	11998598	12025365	0.507148	0.506022	PANCAN	19p	amp	cent	p	1	p	0.95	11753832	19945779	0.172797	0.517446	0.25052	0	inf	0	16	4.00832	268
19	p13.2	ZNF700	NM_144566	12035882	12061588	0.50558	0.504498	PANCAN	19p	amp	cent	p	1	p	0.95	11753832	19945779	0.172797	0.517446	0.25052	0	inf	0	16	4.00832	268
19	p13.2	ZNF763	NM_001012753	12075868	12091198	0.503897	0.503252	PANCAN	19p	amp	cent	p	1	p	0.95	11753832	19945779	0.172797	0.517446	0.25052	0	inf	0	16	4.00832	268
19	p13.2	ZNF433-AS1	NR_134929	12098431	12157090	0.502948	0.50048	PANCAN	19p	amp	cent	p	1	p	0.95	11753832	19945779	0.172797	0.517446	0.25052	0	inf	0	16	4.00832	268
19	p13.2	ZNF433	NM_001308355	12125531	12146556	0.501808	0.500923	PANCAN	19p	amp	cent	p	1	p	0.95	11753832	19945779	0.172797	0.517446	0.25052	0	inf	0	16	4.00832	268
19	p13.2	ZNF878	NM_001080404	12154619	12163782	0.500584	0.500199	PANCAN	19p	amp	cent	p	1	p	0.95	11753832	19945779	0.172797	0.517446	0.25052	0	inf	0	16	4.00832	268
19	p13.2	ZNF844	NR_134326	12175513	12188631	0.499705	0.499153	PANCAN	19p	amp	cent	p	1	p	0.95	11753832	19945779	0.172797	0.517446	0.25052	0	inf	0	16	4.00832	268
19	p13.2	ZNF788	NM_001348164	12203077	12225567	0.498545	0.497599	PANCAN	19p	amp	cent	p	1	p	0.95	11753832	19945779	0.172797	0.517446	0.25052	0	inf	0	16	4.00832	268
19	p13.2	ZNF20	NM_021143	12242167	12251222	0.496901	0.49652	PANCAN	19p	amp	cent	p	1	p	0.95	11753832	19945779	0.172797	0.517446	0.25052	0	inf	0	16	4.00832	268
19	p13.2	ZNF625-ZNF20	NR_037802	12242167	12267546	0.496901	0.495833	PANCAN	19p	amp	cent	p	1	p	0.95	11753832	19945779	0.172797	0.517446	0.25052	0	inf	0	16	4.00832	268
19	p13.2	ZNF625	NM_145233	12255708	12267546	0.496331	0.495833	PANCAN	19p	amp	cent	p	1	p	0.95	11753832	19945779	0.172797	0.517446	0.25052	0	inf	0	16	4.00832	268
19	p13.2	ZNF136	NM_001348013	12273861	12300696	0.495567	0.494438	PANCAN	19p	amp	cent	p	1	p	0.95	11753832	19945779	0.172797	0.517446	0.25052	0	inf	0	16	4.00832	268
19	p13.2	LOC100289333	NR_104179	12305829	12318391	0.494223	0.493694	PANCAN	19p	amp	cent	p	1	p	0.95	11753832	19945779	0.172797	0.517446	0.25052	0	inf	0	16	4.00832	268
19	p13.2	ZNF44	NM_001164276	12382624	12405714	0.490992	0.49002	PANCAN	19p	amp	cent	p	1	p	0.95	11753832	19945779	0.172797	0.517446	0.25052	0	inf	0	16	4.00832	268
19	p13.2	ZNF563	NM_145276	12428303	12444534	0.48907	0.488387	PANCAN	19p	amp	cent	p	1	p	0.95	11753832	19945779	0.172797	0.517446	0.25052	0	inf	0	16	4.00832	268
19	p13.2	ZNF442	NM_030824	12460184	12476475	0.487729	0.487043	PANCAN	19p	amp	cent	p	1	p	0.95	11753832	19945779	0.172797	0.517446	0.25052	0	inf	0	16	4.00832	268
19	p13.2	ZNF799	NM_001080821	12500827	12512088	0.486019	0.485545	PANCAN	19p	amp	cent	p	1	p	0.95	11753832	19945779	0.172797	0.517446	0.25052	0	inf	0	16	4.00832	268
19	p13.2	ZNF443	NM_005815	12540519	12551926	0.484349	0.483869	PANCAN	19p	amp	cent	p	1	p	0.95	11753832	19945779	0.172797	0.517446	0.25052	0	inf	0	16	4.00832	268
19	p13.2	ZNF709	NM_152601	12571997	12595632	0.483024	0.48203	PANCAN	19p	amp	cent	p	1	p	0.95	11753832	19945779	0.172797	0.517446	0.25052	0	inf	0	16	4.00832	268
19	p13.2	ZNF564	NM_144976	12636183	12662356	0.480324	0.479223	PANCAN	19p	amp	cent	p	1	p	0.95	11753832	19945779	0.172797	0.517446	0.25052	0	inf	0	16	4.00832	268
19	p13.2	ZNF490	NM_020714	12686919	12721623	0.478189	0.476729	PANCAN	19p	amp	cent	p	1	p	0.95	11753832	19945779	0.172797	0.517446	0.25052	0	inf	0	16	4.00832	268
19	p13.2	ZNF791	NM_153358	12721731	12740676	0.476725	0.475928	PANCAN	19p	amp	cent	p	1	p	0.95	11753832	19945779	0.172797	0.517446	0.25052	0	inf	0	16	4.00832	268
19	p13.2	MAN2B1	NM_001173498	12757321	12777591	0.475228	0.474375	PANCAN	19p	amp	cent	p	1	p	0.95	11753832	19945779	0.172797	0.517446	0.25052	0	inf	0	16	4.00832	268
19	p13.2	WDR83	NM_001099737	12777617	12786646	0.474374	0.473994	PANCAN	19p	amp	cent	p	1	p	0.95	11753832	19945779	0.172797	0.517446	0.25052	0	inf	0	16	4.00832	268
19	p13.2	WDR83OS	NM_016145	12778880	12780465	0.47432	0.474254	PANCAN	19p	amp	cent	p	1	p	0.95	11753832	19945779	0.172797	0.517446	0.25052	0	inf	0	16	4.00832	268
19	p13.2	DHPS	NM_013406	12786530	12792701	0.473999	0.473739	PANCAN	19p	amp	cent	p	1	p	0.95	11753832	19945779	0.172797	0.517446	0.25052	0	inf	0	16	4.00832	268
19	p13.2	GNG14	NM_001316692	12798811	12799234	0.473482	0.473464	PANCAN	19p	amp	cent	p	1	p	0.95	11753832	19945779	0.172797	0.517446	0.25052	0	inf	0	16	4.00832	268
19	p13.2	FBXW9	NM_032301	12799729	12807455	0.473443	0.473118	PANCAN	19p	amp	cent	p	1	p	0.95	11753832	19945779	0.172797	0.517446	0.25052	0	inf	0	16	4.00832	268
19	p13.2	TNPO2	NM_001136195	12810007	12834810	0.473011	0.471967	PANCAN	19p	amp	cent	p	1	p	0.95	11753832	19945779	0.172797	0.517446	0.25052	0	inf	0	16	4.00832	268
19	p13.2	SNORD135	NR_132756	12814410	12814485	0.472826	0.472823	PANCAN	19p	amp	cent	p	1	p	0.95	11753832	19945779	0.172797	0.517446	0.25052	0	inf	0	16	4.00832	268
19	p13.2	SNORD41	NR_002751	12817262	12817332	0.472706	0.472703	PANCAN	19p	amp	cent	p	1	p	0.95	11753832	19945779	0.172797	0.517446	0.25052	0	inf	0	16	4.00832	268
19	p13.2	TRIR	NM_024038	12841453	12845589	0.471688	0.471514	PANCAN	19p	amp	cent	p	1	p	0.95	11753832	19945779	0.172797	0.517446	0.25052	0	inf	0	16	4.00832	268
19	p13.2	ASNA1	NM_004317	12848272	12859138	0.471401	0.470944	PANCAN	19p	amp	cent	p	1	p	0.95	11753832	19945779	0.172797	0.517446	0.25052	0	inf	0	16	4.00832	268
19	p13.2	BEST2	NM_017682	12863406	12869271	0.470764	0.470518	PANCAN	19p	amp	cent	p	1	p	0.95	11753832	19945779	0.172797	0.517446	0.25052	0	inf	0	16	4.00832	268
19	p13.2	HOOK2	NM_013312	12873816	12886434	0.470326	0.469796	PANCAN	19p	amp	cent	p	1	p	0.95	11753832	19945779	0.172797	0.517446	0.25052	0	inf	0	16	4.00832	268
19	p13.2	MIR5684	NR_049864	12897941	12898006	0.469311	0.469309	PANCAN	19p	amp	cent	p	1	p	0.95	11753832	19945779	0.172797	0.517446	0.25052	0	inf	0	16	4.00832	268
19	p13.2	JUNB	NM_002229	12902309	12904125	0.469128	0.469051	PANCAN	19p	amp	cent	p	1	p	0.95	11753832	19945779	0.172797	0.517446	0.25052	0	inf	0	16	4.00832	268
19	p13.2	PRDX2	NM_005809	12907633	12912724	0.468904	0.468689	PANCAN	19p	amp	cent	p	1	p	0.95	11753832	19945779	0.172797	0.517446	0.25052	0	inf	0	16	4.00832	268
19	p13.2	RNASEH2A	NM_006397	12917427	12924462	0.468492	0.468196	PANCAN	19p	amp	cent	p	1	p	0.95	11753832	19945779	0.172797	0.517446	0.25052	0	inf	0	16	4.00832	268
19	p13.2	RTBDN	NM_031429	12936290	12946242	0.467698	0.467279	PANCAN	19p	amp	cent	p	1	p	0.95	11753832	19945779	0.172797	0.517446	0.25052	0	inf	0	16	4.00832	268
19	p13.2	MAST1	NM_014975	12949258	12985766	0.467152	0.465616	PANCAN	19p	amp	cent	p	1	p	0.95	11753832	19945779	0.172797	0.517446	0.25052	0	inf	0	16	4.00832	268
19	p13.2	MIR6794	NR_106852	12963073	12963141	0.466571	0.466568	PANCAN	19p	amp	cent	p	1	p	0.95	11753832	19945779	0.172797	0.517446	0.25052	0	inf	0	16	4.00832	268
19	p13.2	DNASE2	NM_001375	12986024	12992335	0.465606	0.46534	PANCAN	19p	amp	cent	p	1	p	0.95	11753832	19945779	0.172797	0.517446	0.25052	0	inf	0	16	4.00832	268
19	p13.2	KLF1	NM_006563	12995235	12998017	0.465218	0.465101	PANCAN	19p	amp	cent	p	1	p	0.95	11753832	19945779	0.172797	0.517446	0.25052	0	inf	0	16	4.00832	268
19	p13.2	GCDH	NM_013976	13001942	13010813	0.464936	0.464563	PANCAN	19p	amp	cent	p	1	p	0.95	11753832	19945779	0.172797	0.517446	0.25052	0	inf	0	16	4.00832	268
19	p13.2	SYCE2	NM_001105578	13009893	13030086	0.464601	0.463752	PANCAN	19p	amp	cent	p	1	p	0.95	11753832	19945779	0.172797	0.517446	0.25052	0	inf	0	16	4.00832	268
19	p13.2	FARSA	NM_004461	13033283	13044558	0.463617	0.463143	PANCAN	19p	amp	cent	p	1	p	0.95	11753832	19945779	0.172797	0.517446	0.25052	0	inf	0	16	4.00832	268
19	p13.2	FARSA-AS1	NR_149078	13041335	13044110	0.463279	0.463162	PANCAN	19p	amp	cent	p	1	p	0.95	11753832	19945779	0.172797	0.517446	0.25052	0	inf	0	16	4.00832	268
19	p13.2	CALR	NM_004343	13049413	13055304	0.462939	0.462691	PANCAN	19p	amp	cent	p	1	p	0.95	11753832	19945779	0.172797	0.517446	0.25052	0	inf	0	16	4.00832	268
19	p13.2	MIR6515	NR_106770	13051297	13051354	0.462859	0.462857	PANCAN	19p	amp	cent	p	1	p	0.95	11753832	19945779	0.172797	0.517446	0.25052	0	inf	0	16	4.00832	268
19	p13.2	RAD23A	NM_001270362	13056627	13064457	0.462635	0.462306	PANCAN	19p	amp	cent	p	1	p	0.95	11753832	19945779	0.172797	0.517446	0.25052	0	inf	0	16	4.00832	268
19	p13.2	GADD45GIP1	NM_052850	13064969	13068068	0.462284	0.462154	PANCAN	19p	amp	cent	p	1	p	0.95	11753832	19945779	0.172797	0.517446	0.25052	0	inf	0	16	4.00832	268
19	p13.2	DAND5	NM_152654	13080431	13085567	0.461634	0.461418	PANCAN	19p	amp	cent	p	1	p	0.95	11753832	19945779	0.172797	0.517446	0.25052	0	inf	0	16	4.00832	268
19	p13.2	NFIX	NM_002501	13106583	13209610	0.460533	0.456199	PANCAN	19p	amp	cent	p	1	p	0.95	11753832	19945779	0.172797	0.517446	0.25052	0	inf	0	16	4.00832	268
19	p13.2	LYL1	NM_005583	13209841	13213974	0.456189	0.456015	PANCAN	19p	amp	cent	p	1	p	0.95	11753832	19945779	0.172797	0.517446	0.25052	0	inf	0	16	4.00832	268
19	p13.2	TRMT1	NM_001136035	13215713	13227585	0.455942	0.455443	PANCAN	19p	amp	cent	p	1	p	0.95	11753832	19945779	0.172797	0.517446	0.25052	0	inf	0	16	4.00832	268
19	p13.2	NACC1	NM_052876	13229101	13251961	0.455379	0.454417	PANCAN	19p	amp	cent	p	1	p	0.95	11753832	19945779	0.172797	0.517446	0.25052	0	inf	0	16	4.00832	268
19	p13.2	STX10	NM_001271611	13254871	13261188	0.454295	0.454029	PANCAN	19p	amp	cent	p	1	p	0.95	11753832	19945779	0.172797	0.517446	0.25052	0	inf	0	16	4.00832	268
19	p13.2	IER2	NM_004907	13261281	13265718	0.454025	0.453838	PANCAN	19p	amp	cent	p	1	p	0.95	11753832	19945779	0.172797	0.517446	0.25052	0	inf	0	16	4.00832	268
19	p13.2	CACNA1A	NM_023035	13317255	13617274	0.45167	0.439048	PANCAN	19p	amp	cent	p	1	p	0.95	11753832	19945779	0.172797	0.517446	0.25052	0	inf	0	16	4.00832	268
19	p13.2	CCDC130	NM_001320567	13842573	13874112	0.429569	0.428242	PANCAN	19p	amp	cent	p	1	p	0.95	11753832	19945779	0.172797	0.517446	0.25052	0	inf	0	16	4.00832	268
19	p13.2	MRI1	NR_138051	13875327	13885096	0.428191	0.42778	PANCAN	19p	amp	cent	p	1	p	0.95	11753832	19945779	0.172797	0.517446	0.25052	0	inf	0	16	4.00832	268
19	p13.2	C19orf53	NM_014047	13885256	13889586	0.427773	0.427591	PANCAN	19p	amp	cent	p	1	p	0.95	11753832	19945779	0.172797	0.517446	0.25052	0	inf	0	16	4.00832	268
19	p13.13	ZSWIM4	NM_023072	13906273	13943044	0.426889	0.425342	PANCAN	19p	amp	cent	p	1	p	0.95	11753832	19945779	0.172797	0.517446	0.25052	0	inf	0	16	4.00832	268
19	p13.13	LOC284454	NR_036515	13945329	13947103	0.425246	0.425171	PANCAN	19p	amp	cent	p	1	p	0.95	11753832	19945779	0.172797	0.517446	0.25052	0	inf	0	16	4.00832	268
19	p13.13	MIR24-2	NR_029497	13947100	13947173	0.425172	0.425168	PANCAN	19p	amp	cent	p	1	p	0.95	11753832	19945779	0.172797	0.517446	0.25052	0	inf	0	16	4.00832	268
19	p13.13	MIR27A	NR_029501	13947253	13947331	0.425165	0.425162	PANCAN	19p	amp	cent	p	1	p	0.95	11753832	19945779	0.172797	0.517446	0.25052	0	inf	0	16	4.00832	268
19	p13.13	MIR23A	NR_029495	13947400	13947473	0.425159	0.425156	PANCAN	19p	amp	cent	p	1	p	0.95	11753832	19945779	0.172797	0.517446	0.25052	0	inf	0	16	4.00832	268
19	p13.13	NANOS3	NR_146095	13972876	13991571	0.424087	0.423301	PANCAN	19p	amp	cent	p	1	p	0.95	11753832	19945779	0.172797	0.517446	0.25052	0	inf	0	16	4.00832	268
19	p13.13	MIR181C	NR_029613	13985512	13985622	0.423555	0.423551	PANCAN	19p	amp	cent	p	1	p	0.95	11753832	19945779	0.172797	0.517446	0.25052	0	inf	0	16	4.00832	268
19	p13.13	MIR181D	NR_030179	13985688	13985825	0.423548	0.423542	PANCAN	19p	amp	cent	p	1	p	0.95	11753832	19945779	0.172797	0.517446	0.25052	0	inf	0	16	4.00832	268
19	p13.12	C19orf57	NM_024323	13993160	14016978	0.423234	0.422232	PANCAN	19p	amp	cent	p	1	p	0.95	11753832	19945779	0.172797	0.517446	0.25052	0	inf	0	16	4.00832	268
19	p13.12	CC2D1A	NM_017721	14016955	14041693	0.422233	0.421192	PANCAN	19p	amp	cent	p	1	p	0.95	11753832	19945779	0.172797	0.517446	0.25052	0	inf	0	16	4.00832	268
19	p13.12	PODNL1	NM_001146254	14041999	14064204	0.421179	0.420245	PANCAN	19p	amp	cent	p	1	p	0.95	11753832	19945779	0.172797	0.517446	0.25052	0	inf	0	16	4.00832	268
19	p13.12	DCAF15	NM_138353	14063285	14072261	0.420283	0.419906	PANCAN	19p	amp	cent	p	1	p	0.95	11753832	19945779	0.172797	0.517446	0.25052	0	inf	0	16	4.00832	268
19	p13.12	RFX1	NM_002918	14072341	14117134	0.419902	0.418018	PANCAN	19p	amp	cent	p	1	p	0.95	11753832	19945779	0.172797	0.517446	0.25052	0	inf	0	16	4.00832	268
19	p13.12	RLN3	NM_001311197	14138959	14142370	0.4171	0.416956	PANCAN	19p	amp	cent	p	1	p	0.95	11753832	19945779	0.172797	0.517446	0.25052	0	inf	0	16	4.00832	268
19	p13.12	IL27RA	NM_004843	14142551	14163717	0.416949	0.416058	PANCAN	19p	amp	cent	p	1	p	0.95	11753832	19945779	0.172797	0.517446	0.25052	0	inf	0	16	4.00832	268
19	p13.12	PALM3	NM_001145028	14164178	14169971	0.416039	0.415795	PANCAN	19p	amp	cent	p	1	p	0.95	11753832	19945779	0.172797	0.517446	0.25052	0	inf	0	16	4.00832	268
19	p13.12	MISP3	NR_111941	14183820	14185874	0.415212	0.415126	PANCAN	19p	amp	cent	p	1	p	0.95	11753832	19945779	0.172797	0.517446	0.25052	0	inf	0	16	4.00832	268
19	p13.12	MIR1199	NR_106715	14184172	14184291	0.415198	0.415193	PANCAN	19p	amp	cent	p	1	p	0.95	11753832	19945779	0.172797	0.517446	0.25052	0	inf	0	16	4.00832	268
19	p13.12	C19orf67	NM_001277378	14192443	14196607	0.41485	0.414674	PANCAN	19p	amp	cent	p	1	p	0.95	11753832	19945779	0.172797	0.517446	0.25052	0	inf	0	16	4.00832	268
19	p13.12	SAMD1	NM_138352	14198657	14201387	0.414588	0.414473	PANCAN	19p	amp	cent	p	1	p	0.95	11753832	19945779	0.172797	0.517446	0.25052	0	inf	0	16	4.00832	268
19	p13.12	PRKACA	NM_002730	14202506	14228559	0.414426	0.41333	PANCAN	19p	amp	cent	p	1	p	0.95	11753832	19945779	0.172797	0.517446	0.25052	0	inf	0	16	4.00832	268
19	p13.12	ASF1B	NM_018154	14230320	14247440	0.413256	0.412536	PANCAN	19p	amp	cent	p	1	p	0.95	11753832	19945779	0.172797	0.517446	0.25052	0	inf	0	16	4.00832	268
19	p13.12	LOC100507373	NR_045214	14247963	14282075	0.412514	0.411079	PANCAN	19p	amp	cent	p	1	p	0.95	11753832	19945779	0.172797	0.517446	0.25052	0	inf	0	16	4.00832	268
19	p13.12	ADGRL1	NM_014921	14258548	14316997	0.412068	0.409609	PANCAN	19p	amp	cent	p	1	p	0.95	11753832	19945779	0.172797	0.517446	0.25052	0	inf	0	16	4.00832	268
19	p13.12	LINC01841	NR_134908	14416269	14474802	0.405433	0.40297	PANCAN	19p	amp	cent	p	1	p	0.95	11753832	19945779	0.172797	0.517446	0.25052	0	inf	0	16	4.00832	268
19	p13.12	LINC01842	NR_134916	14444554	14454726	0.404243	0.403815	PANCAN	19p	amp	cent	p	1	p	0.95	11753832	19945779	0.172797	0.517446	0.25052	0	inf	0	16	4.00832	268
19	p13.12	ADGRE5	NM_001025160	14491955	14519537	0.402249	0.401088	PANCAN	19p	amp	cent	p	1	p	0.95	11753832	19945779	0.172797	0.517446	0.25052	0	inf	0	16	4.00832	268
19	p13.12	DDX39A	NM_005804	14519609	14530195	0.401085	0.40064	PANCAN	19p	amp	cent	p	1	p	0.95	11753832	19945779	0.172797	0.517446	0.25052	0	inf	0	16	4.00832	268
19	p13.12	PKN1	NM_002741	14544165	14582679	0.400052	0.398432	PANCAN	19p	amp	cent	p	1	p	0.95	11753832	19945779	0.172797	0.517446	0.25052	0	inf	0	16	4.00832	268
19	p13.12	PTGER1	NM_000955	14583277	14586174	0.398407	0.398285	PANCAN	19p	amp	cent	p	1	p	0.95	11753832	19945779	0.172797	0.517446	0.25052	0	inf	0	16	4.00832	268
19	p13.12	GIPC1	NM_005716	14588570	14606961	0.398184	0.39741	PANCAN	19p	amp	cent	p	1	p	0.95	11753832	19945779	0.172797	0.517446	0.25052	0	inf	0	16	4.00832	268
19	p13.12	DNAJB1	NM_001313964	14625575	14640134	0.396627	0.396014	PANCAN	19p	amp	cent	p	1	p	0.95	11753832	19945779	0.172797	0.517446	0.25052	0	inf	0	16	4.00832	268
19	p13.12	MIR639	NR_030369	14640354	14640452	0.396005	0.396001	PANCAN	19p	amp	cent	p	1	p	0.95	11753832	19945779	0.172797	0.517446	0.25052	0	inf	0	16	4.00832	268
19	p13.12	TECR	NM_001321170	14640371	14676792	0.396004	0.394472	PANCAN	19p	amp	cent	p	1	p	0.95	11753832	19945779	0.172797	0.517446	0.25052	0	inf	0	16	4.00832	268
19	p13.12	NDUFB7	NM_004146	14676889	14682889	0.394468	0.394216	PANCAN	19p	amp	cent	p	1	p	0.95	11753832	19945779	0.172797	0.517446	0.25052	0	inf	0	16	4.00832	268
19	p13.12	CLEC17A	NM_207390	14693895	14721956	0.393753	0.392572	PANCAN	19p	amp	cent	p	1	p	0.95	11753832	19945779	0.172797	0.517446	0.25052	0	inf	0	16	4.00832	268
19	p13.12	ADGRE3	NM_001289159	14729928	14785730	0.392237	0.389889	PANCAN	19p	amp	cent	p	1	p	0.95	11753832	19945779	0.172797	0.517446	0.25052	0	inf	0	16	4.00832	268
19	p13.12	SNORA104	NR_132784	14733024	14733163	0.392106	0.392101	PANCAN	19p	amp	cent	p	1	p	0.95	11753832	19945779	0.172797	0.517446	0.25052	0	inf	0	16	4.00832	268
19	p13.12	ZNF333	NM_001300912	14800851	14844558	0.389253	0.387414	PANCAN	19p	amp	cent	p	1	p	0.95	11753832	19945779	0.172797	0.517446	0.25052	0	inf	0	16	4.00832	268
19	p13.12	ADGRE2	NM_013447	14843508	14889353	0.387458	0.385529	PANCAN	19p	amp	cent	p	1	p	0.95	11753832	19945779	0.172797	0.517446	0.25052	0	inf	0	16	4.00832	268
19	p13.12	OR7C1	NM_198944	14909985	14910948	0.384661	0.384621	PANCAN	19p	amp	cent	p	1	p	0.95	11753832	19945779	0.172797	0.517446	0.25052	0	inf	0	16	4.00832	268
19	p13.12	OR7A5	NM_017506	14937138	14939276	0.383519	0.383429	PANCAN	19p	amp	cent	p	1	p	0.95	11753832	19945779	0.172797	0.517446	0.25052	0	inf	0	16	4.00832	268
19	p13.12	OR7A10	NM_001005190	14951759	14952689	0.382904	0.382865	PANCAN	19p	amp	cent	p	1	p	0.95	11753832	19945779	0.172797	0.517446	0.25052	0	inf	0	16	4.00832	268
19	p13.12	OR7A17	NM_030901	14991237	14992167	0.381243	0.381204	PANCAN	19p	amp	cent	p	1	p	0.95	11753832	19945779	0.172797	0.517446	0.25052	0	inf	0	16	4.00832	268
19	p13.12	OR7C2	NM_012377	15052300	15053260	0.378674	0.378634	PANCAN	19p	amp	cent	p	1	p	0.95	11753832	19945779	0.172797	0.517446	0.25052	0	inf	0	16	4.00832	268
19	p13.12	SLC1A6	NR_073589	15060844	15121455	0.378315	0.375764	PANCAN	19p	amp	cent	p	1	p	0.95	11753832	19945779	0.172797	0.517446	0.25052	0	inf	0	16	4.00832	268
19	p13.12	CCDC105	NM_173482	15121538	15134083	0.375761	0.375233	PANCAN	19p	amp	cent	p	1	p	0.95	11753832	19945779	0.172797	0.517446	0.25052	0	inf	0	16	4.00832	268
19	p13.12	CASP14	NM_012114	15160290	15169103	0.374131	0.37376	PANCAN	19p	amp	cent	p	1	p	0.95	11753832	19945779	0.172797	0.517446	0.25052	0	inf	0	16	4.00832	268
19	p13.12	OR1I1	NM_001004713	15197876	15198944	0.372549	0.372504	PANCAN	19p	amp	cent	p	1	p	0.95	11753832	19945779	0.172797	0.517446	0.25052	0	inf	0	16	4.00832	268
19	p13.12	SYDE1	NM_033025	15218174	15225799	0.371695	0.371375	PANCAN	19p	amp	cent	p	1	p	0.95	11753832	19945779	0.172797	0.517446	0.25052	0	inf	0	16	4.00832	268
19	p13.12	ILVBL	NM_006844	15225784	15236610	0.371375	0.37092	PANCAN	19p	amp	cent	p	1	p	0.95	11753832	19945779	0.172797	0.517446	0.25052	0	inf	0	16	4.00832	268
19	p13.12	NOTCH3	NM_000435	15270443	15311792	0.369496	0.367757	PANCAN	19p	amp	cent	p	1	p	0.95	11753832	19945779	0.172797	0.517446	0.25052	0	inf	0	16	4.00832	268
19	p13.12	MIR6795	NR_106853	15290093	15290161	0.36867	0.368667	PANCAN	19p	amp	cent	p	1	p	0.95	11753832	19945779	0.172797	0.517446	0.25052	0	inf	0	16	4.00832	268
19	p13.12	EPHX3	NM_001142886	15337732	15343858	0.366665	0.366408	PANCAN	19p	amp	cent	p	1	p	0.95	11753832	19945779	0.172797	0.517446	0.25052	0	inf	0	16	4.00832	268
19	p13.12	BRD4	NM_001330384	15363805	15443354	0.365568	0.362222	PANCAN	19p	amp	cent	p	1	p	0.95	11753832	19945779	0.172797	0.517446	0.25052	0	inf	0	16	4.00832	268
19	p13.12	AKAP8	NM_005858	15464331	15490612	0.361339	0.360233	PANCAN	19p	amp	cent	p	1	p	0.95	11753832	19945779	0.172797	0.517446	0.25052	0	inf	0	16	4.00832	268
19	p13.12	AKAP8L	NR_111971	15490858	15529932	0.360223	0.358579	PANCAN	19p	amp	cent	p	1	p	0.95	11753832	19945779	0.172797	0.517446	0.25052	0	inf	0	16	4.00832	268
19	p13.12	WIZ	NM_021241	15532317	15560762	0.358479	0.357282	PANCAN	19p	amp	cent	p	1	p	0.95	11753832	19945779	0.172797	0.517446	0.25052	0	inf	0	16	4.00832	268
19	p13.12	MIR1470	NR_031716	15560358	15560419	0.357299	0.357297	PANCAN	19p	amp	cent	p	1	p	0.95	11753832	19945779	0.172797	0.517446	0.25052	0	inf	0	16	4.00832	268
19	p13.12	RASAL3	NM_022904	15562435	15575392	0.357212	0.356667	PANCAN	19p	amp	cent	p	1	p	0.95	11753832	19945779	0.172797	0.517446	0.25052	0	inf	0	16	4.00832	268
19	p13.12	PGLYRP2	NM_052890	15579456	15590315	0.356496	0.356039	PANCAN	19p	amp	cent	p	1	p	0.95	11753832	19945779	0.172797	0.517446	0.25052	0	inf	0	16	4.00832	268
19	p13.12	CYP4F22	NM_173483	15619335	15663128	0.354818	0.352975	PANCAN	19p	amp	cent	p	1	p	0.95	11753832	19945779	0.172797	0.517446	0.25052	0	inf	0	16	4.00832	268
19	p13.12	CYP4F8	NM_007253	15726028	15740447	0.350329	0.349722	PANCAN	19p	amp	cent	p	1	p	0.95	11753832	19945779	0.172797	0.517446	0.25052	0	inf	0	16	4.00832	268
19	p13.12	CYP4F3	NM_001199209	15751706	15771570	0.349249	0.348413	PANCAN	19p	amp	cent	p	1	p	0.95	11753832	19945779	0.172797	0.517446	0.25052	0	inf	0	16	4.00832	268
19	p13.12	CYP4F12	NR_117085	15783827	15807984	0.347897	0.346881	PANCAN	19p	amp	cent	p	1	p	0.95	11753832	19945779	0.172797	0.517446	0.25052	0	inf	0	16	4.00832	268
19	p13.12	OR10H2	NM_013939	15838833	15839862	0.345583	0.34554	PANCAN	19p	amp	cent	p	1	p	0.95	11753832	19945779	0.172797	0.517446	0.25052	0	inf	0	16	4.00832	268
19	p13.12	OR10H3	NM_013938	15852202	15853153	0.345021	0.344981	PANCAN	19p	amp	cent	p	1	p	0.95	11753832	19945779	0.172797	0.517446	0.25052	0	inf	0	16	4.00832	268
19	p13.12	CYP4F24P	NR_033864	15870143	15890798	0.344266	0.343397	PANCAN	19p	amp	cent	p	1	p	0.95	11753832	19945779	0.172797	0.517446	0.25052	0	inf	0	16	4.00832	268
19	p13.12	OR10H5	NM_001004466	15904858	15905806	0.342805	0.342766	PANCAN	19p	amp	cent	p	1	p	0.95	11753832	19945779	0.172797	0.517446	0.25052	0	inf	0	16	4.00832	268
19	p13.12	OR10H1	NM_013940	15917816	15918936	0.34226	0.342213	PANCAN	19p	amp	cent	p	1	p	0.95	11753832	19945779	0.172797	0.517446	0.25052	0	inf	0	16	4.00832	268
19	p13.12	UCA1	NR_015379	15939756	15947131	0.341337	0.341027	PANCAN	19p	amp	cent	p	1	p	0.95	11753832	19945779	0.172797	0.517446	0.25052	0	inf	0	16	4.00832	268
19	p13.12	LINC01835	NM_001302493	15962803	15975714	0.340368	0.339824	PANCAN	19p	amp	cent	p	1	p	0.95	11753832	19945779	0.172797	0.517446	0.25052	0	inf	0	16	4.00832	268
19	p13.12	CYP4F2	NM_001082	15988833	16008930	0.339272	0.338427	PANCAN	19p	amp	cent	p	1	p	0.95	11753832	19945779	0.172797	0.517446	0.25052	0	inf	0	16	4.00832	268
19	p13.12	CYP4F11	NM_001128932	16023179	16045676	0.337827	0.336881	PANCAN	19p	amp	cent	p	1	p	0.95	11753832	19945779	0.172797	0.517446	0.25052	0	inf	0	16	4.00832	268
19	p13.12	OR10H4	NM_001004465	16059817	16060768	0.336286	0.336246	PANCAN	19p	amp	cent	p	1	p	0.95	11753832	19945779	0.172797	0.517446	0.25052	0	inf	0	16	4.00832	268
19	p13.12	LINC00661	NR_026828	16126443	16138272	0.333483	0.332985	PANCAN	19p	amp	cent	p	1	p	0.95	11753832	19945779	0.172797	0.517446	0.25052	0	inf	0	16	4.00832	268
19	p13.12	LINC00905	NR_024335	16144522	16152945	0.332722	0.332368	PANCAN	19p	amp	cent	p	1	p	0.95	11753832	19945779	0.172797	0.517446	0.25052	0	inf	0	16	4.00832	268
19	p13.12	LINC01855	NR_146442	16176496	16177113	0.331377	0.331351	PANCAN	19p	amp	cent	p	1	p	0.95	11753832	19945779	0.172797	0.517446	0.25052	0	inf	0	16	4.00832	268
19	p13.12	TPM4	NM_001145160	16178316	16213813	0.331301	0.329807	PANCAN	19p	amp	cent	p	1	p	0.95	11753832	19945779	0.172797	0.517446	0.25052	0	inf	0	16	4.00832	268
19	p13.12	RAB8A	NM_005370	16222489	16244445	0.329442	0.328518	PANCAN	19p	amp	cent	p	1	p	0.95	11753832	19945779	0.172797	0.517446	0.25052	0	inf	0	16	4.00832	268
19	p13.12	HSH2D	NR_111903	16244837	16269384	0.328502	0.327469	PANCAN	19p	amp	cent	p	1	p	0.95	11753832	19945779	0.172797	0.517446	0.25052	0	inf	0	16	4.00832	268
19	p13.12	CIB3	NM_054113	16272178	16284336	0.327352	0.32684	PANCAN	19p	amp	cent	p	1	p	0.95	11753832	19945779	0.172797	0.517446	0.25052	0	inf	0	16	4.00832	268
19	p13.12	FAM32A	NM_014077	16296211	16302857	0.326341	0.326061	PANCAN	19p	amp	cent	p	1	p	0.95	11753832	19945779	0.172797	0.517446	0.25052	0	inf	0	16	4.00832	268
19	p13.11	AP1M1	NM_001130524	16308664	16346156	0.325817	0.324239	PANCAN	19p	amp	cent	p	1	p	0.95	11753832	19945779	0.172797	0.517446	0.25052	0	inf	0	16	4.00832	268
19	p13.11	KLF2	NM_016270	16435636	16439473	0.320475	0.320313	PANCAN	19p	amp	cent	p	1	p	0.95	11753832	19945779	0.172797	0.517446	0.25052	0	inf	0	16	4.00832	268
19	p13.11	EPS15L1	NM_001258374	16466054	16582823	0.319195	0.314282	PANCAN	19p	amp	cent	p	1	p	0.95	11753832	19945779	0.172797	0.517446	0.25052	0	inf	0	16	4.00832	268
19	p13.11	CALR3	NM_145046	16589867	16607003	0.313986	0.313265	PANCAN	19p	amp	cent	p	1	p	0.95	11753832	19945779	0.172797	0.517446	0.25052	0	inf	0	16	4.00832	268
19	p13.11	C19orf44	NM_032207	16607121	16632180	0.31326	0.312206	PANCAN	19p	amp	cent	p	1	p	0.95	11753832	19945779	0.172797	0.517446	0.25052	0	inf	0	16	4.00832	268
19	p13.11	CHERP	NM_006387	16628699	16653263	0.312352	0.311319	PANCAN	19p	amp	cent	p	1	p	0.95	11753832	19945779	0.172797	0.517446	0.25052	0	inf	0	16	4.00832	268
19	p13.11	SLC35E1	NM_024881	16660647	16683193	0.311008	0.31006	PANCAN	19p	amp	cent	p	1	p	0.95	11753832	19945779	0.172797	0.517446	0.25052	0	inf	0	16	4.00832	268
19	p13.11	MED26	NM_004831	16685717	16739015	0.309953	0.307711	PANCAN	19p	amp	cent	p	1	p	0.95	11753832	19945779	0.172797	0.517446	0.25052	0	inf	0	16	4.00832	268
19	p13.11	SMIM7	NM_024104	16756958	16770968	0.306956	0.306367	PANCAN	19p	amp	cent	p	1	p	0.95	11753832	19945779	0.172797	0.517446	0.25052	0	inf	0	16	4.00832	268
19	p13.11	TMEM38A	NM_024074	16771937	16799816	0.306326	0.305153	PANCAN	19p	amp	cent	p	1	p	0.95	11753832	19945779	0.172797	0.517446	0.25052	0	inf	0	16	4.00832	268
19	p13.11	NWD1	NM_001290355	16830786	16928774	0.30385	0.299728	PANCAN	19p	amp	cent	p	1	p	0.95	11753832	19945779	0.172797	0.517446	0.25052	0	inf	0	16	4.00832	268
19	p13.11	SIN3B	NM_015260	16940197	16991164	0.299247	0.297103	PANCAN	19p	amp	cent	p	1	p	0.95	11753832	19945779	0.172797	0.517446	0.25052	0	inf	0	16	4.00832	268
19	p13.11	F2RL3	NM_003950	16999670	17003411	0.296745	0.296588	PANCAN	19p	amp	cent	p	1	p	0.95	11753832	19945779	0.172797	0.517446	0.25052	0	inf	0	16	4.00832	268
19	p13.11	CPAMD8	NM_015692	17003757	17137625	0.296573	0.290941	PANCAN	19p	amp	cent	p	1	p	0.95	11753832	19945779	0.172797	0.517446	0.25052	0	inf	0	16	4.00832	268
19	p13.11	HAUS8	NM_033417	17160570	17186343	0.289976	0.288891	PANCAN	19p	amp	cent	p	1	p	0.95	11753832	19945779	0.172797	0.517446	0.25052	0	inf	0	16	4.00832	268
19	p13.11	MYO9B	NM_001130065	17186590	17324104	0.288881	0.283095	PANCAN	19p	amp	cent	p	1	p	0.95	11753832	19945779	0.172797	0.517446	0.25052	0	inf	0	16	4.00832	268
19	p13.11	SNORA118	NR_145784	17203044	17203175	0.288189	0.288183	PANCAN	19p	amp	cent	p	1	p	0.95	11753832	19945779	0.172797	0.517446	0.25052	0	inf	0	16	4.00832	268
19	p13.11	USE1	NM_018467	17326154	17330638	0.283009	0.282821	PANCAN	19p	amp	cent	p	1	p	0.95	11753832	19945779	0.172797	0.517446	0.25052	0	inf	0	16	4.00832	268
19	p13.11	OCEL1	NM_024578	17337012	17340028	0.282552	0.282425	PANCAN	19p	amp	cent	p	1	p	0.95	11753832	19945779	0.172797	0.517446	0.25052	0	inf	0	16	4.00832	268
19	p13.11	NR2F6	NM_005234	17342693	17356151	0.282313	0.281747	PANCAN	19p	amp	cent	p	1	p	0.95	11753832	19945779	0.172797	0.517446	0.25052	0	inf	0	16	4.00832	268
19	p13.11	USHBP1	NM_001321417	17360829	17375605	0.28155	0.280929	PANCAN	19p	amp	cent	p	1	p	0.95	11753832	19945779	0.172797	0.517446	0.25052	0	inf	0	16	4.00832	268
19	p13.11	BABAM1	NM_001288757	17378184	17390162	0.28082	0.280316	PANCAN	19p	amp	cent	p	1	p	0.95	11753832	19945779	0.172797	0.517446	0.25052	0	inf	0	16	4.00832	268
19	p13.11	ANKLE1	NM_001278445	17392453	17398455	0.28022	0.279967	PANCAN	19p	amp	cent	p	1	p	0.95	11753832	19945779	0.172797	0.517446	0.25052	0	inf	0	16	4.00832	268
19	p13.11	ABHD8	NM_024527	17402939	17414282	0.279779	0.279301	PANCAN	19p	amp	cent	p	1	p	0.95	11753832	19945779	0.172797	0.517446	0.25052	0	inf	0	16	4.00832	268
19	p13.11	MRPL34	NM_023937	17416476	17417652	0.279209	0.27916	PANCAN	19p	amp	cent	p	1	p	0.95	11753832	19945779	0.172797	0.517446	0.25052	0	inf	0	16	4.00832	268
19	p13.11	DDA1	NM_024050	17420336	17434106	0.279047	0.278467	PANCAN	19p	amp	cent	p	1	p	0.95	11753832	19945779	0.172797	0.517446	0.25052	0	inf	0	16	4.00832	268
19	p13.11	ANO8	NM_020959	17434031	17445638	0.278471	0.277982	PANCAN	19p	amp	cent	p	1	p	0.95	11753832	19945779	0.172797	0.517446	0.25052	0	inf	0	16	4.00832	268
19	p13.11	GTPBP3	NM_001195422	17445790	17453540	0.277976	0.27765	PANCAN	19p	amp	cent	p	1	p	0.95	11753832	19945779	0.172797	0.517446	0.25052	0	inf	0	16	4.00832	268
19	p13.11	PLVAP	NM_031310	17462256	17488158	0.277283	0.276193	PANCAN	19p	amp	cent	p	1	p	0.95	11753832	19945779	0.172797	0.517446	0.25052	0	inf	0	16	4.00832	268
19	p13.11	BST2	NM_004335	17513747	17516457	0.275117	0.275003	PANCAN	19p	amp	cent	p	1	p	0.95	11753832	19945779	0.172797	0.517446	0.25052	0	inf	0	16	4.00832	268
19	p13.11	BISPR	NR_130765	17516494	17526545	0.275001	0.274578	PANCAN	19p	amp	cent	p	1	p	0.95	11753832	19945779	0.172797	0.517446	0.25052	0	inf	0	16	4.00832	268
19	p13.11	MVB12A	NM_001304547	17516494	17536148	0.275001	0.274174	PANCAN	19p	amp	cent	p	1	p	0.95	11753832	19945779	0.172797	0.517446	0.25052	0	inf	0	16	4.00832	268
19	p13.11	TMEM221	NM_001190844	17546317	17559376	0.273747	0.273197	PANCAN	19p	amp	cent	p	1	p	0.95	11753832	19945779	0.172797	0.517446	0.25052	0	inf	0	16	4.00832	268
19	p13.11	NXNL1	NM_138454	17566233	17571725	0.272909	0.272678	PANCAN	19p	amp	cent	p	1	p	0.95	11753832	19945779	0.172797	0.517446	0.25052	0	inf	0	16	4.00832	268
19	p13.11	SLC27A1	NM_198580	17581252	17616977	0.272277	0.270774	PANCAN	19p	amp	cent	p	1	p	0.95	11753832	19945779	0.172797	0.517446	0.25052	0	inf	0	16	4.00832	268
19	p13.11	LOC100507551	NR_147835	17599798	17622698	0.271497	0.270533	PANCAN	19p	amp	cent	p	1	p	0.95	11753832	19945779	0.172797	0.517446	0.25052	0	inf	0	16	4.00832	268
19	p13.11	PGLS	NM_012088	17622431	17632097	0.270544	0.270138	PANCAN	19p	amp	cent	p	1	p	0.95	11753832	19945779	0.172797	0.517446	0.25052	0	inf	0	16	4.00832	268
19	p13.11	FAM129C	NM_173544	17634109	17664648	0.270053	0.268768	PANCAN	19p	amp	cent	p	1	p	0.95	11753832	19945779	0.172797	0.517446	0.25052	0	inf	0	16	4.00832	268
19	p13.11	COLGALT1	NM_024656	17666402	17693971	0.268694	0.267535	PANCAN	19p	amp	cent	p	1	p	0.95	11753832	19945779	0.172797	0.517446	0.25052	0	inf	0	16	4.00832	268
19	p13.11	UNC13A	NM_001080421	17712136	17799008	0.26677	0.263115	PANCAN	19p	amp	cent	p	1	p	0.95	11753832	19945779	0.172797	0.517446	0.25052	0	inf	0	16	4.00832	268
19	p13.11	MAP1S	NM_018174	17830260	17845324	0.261801	0.261167	PANCAN	19p	amp	cent	p	1	p	0.95	11753832	19945779	0.172797	0.517446	0.25052	0	inf	0	16	4.00832	268
19	p13.11	FCHO1	NM_001161358	17858526	17899377	0.260611	0.258893	PANCAN	19p	amp	cent	p	1	p	0.95	11753832	19945779	0.172797	0.517446	0.25052	0	inf	0	16	4.00832	268
19	p13.11	B3GNT3	NM_014256	17905918	17924385	0.258618	0.257841	PANCAN	19p	amp	cent	p	1	p	0.95	11753832	19945779	0.172797	0.517446	0.25052	0	inf	0	16	4.00832	268
19	p13.11	INSL3	NM_001265587	17927321	17932383	0.257717	0.257504	PANCAN	19p	amp	cent	p	1	p	0.95	11753832	19945779	0.172797	0.517446	0.25052	0	inf	0	16	4.00832	268
19	p13.11	JAK3	NM_000215	17935592	17958841	0.257369	0.256391	PANCAN	19p	amp	cent	p	1	p	0.95	11753832	19945779	0.172797	0.517446	0.25052	0	inf	0	16	4.00832	268
19	p13.11	RPL18A	NM_000980	17970686	17974133	0.255893	0.255748	PANCAN	19p	amp	cent	p	1	p	0.95	11753832	19945779	0.172797	0.517446	0.25052	0	inf	0	16	4.00832	268
19	p13.11	SNORA68	NR_000012	17973396	17973529	0.255779	0.255773	PANCAN	19p	amp	cent	p	1	p	0.95	11753832	19945779	0.172797	0.517446	0.25052	0	inf	0	16	4.00832	268
19	p13.11	SLC5A5	NM_000453	17982781	18005983	0.255384	0.254408	PANCAN	19p	amp	cent	p	1	p	0.95	11753832	19945779	0.172797	0.517446	0.25052	0	inf	0	16	4.00832	268
19	p13.11	CCDC124	NM_001136203	18043823	18054794	0.252816	0.252354	PANCAN	19p	amp	cent	p	1	p	0.95	11753832	19945779	0.172797	0.517446	0.25052	0	inf	0	16	4.00832	268
19	p13.11	KCNN1	NM_002248	18062110	18109930	0.252046	0.250034	PANCAN	19p	amp	cent	p	1	p	0.95	11753832	19945779	0.172797	0.517446	0.25052	0	inf	0	16	4.00832	268
19	p13.11	ARRDC2	NM_001025604	18111940	18124911	0.24995	0.249404	PANCAN	19p	amp	cent	p	1	p	0.95	11753832	19945779	0.172797	0.517446	0.25052	0	inf	0	16	4.00832	268
19	p13.11	IL12RB1	NM_001290024	18169804	18209626	0.247515	0.24584	PANCAN	19p	amp	cent	p	1	p	0.95	11753832	19945779	0.172797	0.517446	0.25052	0	inf	0	16	4.00832	268
19	p13.11	MAST3	NM_015016	18208602	18262499	0.245883	0.243616	PANCAN	19p	amp	cent	p	1	p	0.95	11753832	19945779	0.172797	0.517446	0.25052	0	inf	0	16	4.00832	268
19	p13.11	PIK3R2	NM_005027	18263987	18281343	0.243553	0.242823	PANCAN	19p	amp	cent	p	1	p	0.95	11753832	19945779	0.172797	0.517446	0.25052	0	inf	0	16	4.00832	268
19	p13.11	IFI30	NM_006332	18284589	18288934	0.242686	0.242503	PANCAN	19p	amp	cent	p	1	p	0.95	11753832	19945779	0.172797	0.517446	0.25052	0	inf	0	16	4.00832	268
19	p13.11	MPV17L2	NM_032683	18304039	18307550	0.241868	0.24172	PANCAN	19p	amp	cent	p	1	p	0.95	11753832	19945779	0.172797	0.517446	0.25052	0	inf	0	16	4.00832	268
19	p13.11	RAB3A	NM_002866	18307610	18314874	0.241718	0.241412	PANCAN	19p	amp	cent	p	1	p	0.95	11753832	19945779	0.172797	0.517446	0.25052	0	inf	0	16	4.00832	268
19	p13.11	LOC102725254	NR_134910	18315539	18316373	0.241384	0.241349	PANCAN	19p	amp	cent	p	1	p	0.95	11753832	19945779	0.172797	0.517446	0.25052	0	inf	0	16	4.00832	268
19	p13.11	PDE4C	NM_000923	18318770	18359010	0.241248	0.239555	PANCAN	19p	amp	cent	p	1	p	0.95	11753832	19945779	0.172797	0.517446	0.25052	0	inf	0	16	4.00832	268
19	p13.11	LOC729966	NR_036575	18360759	18366229	0.239482	0.239252	PANCAN	19p	amp	cent	p	1	p	0.95	11753832	19945779	0.172797	0.517446	0.25052	0	inf	0	16	4.00832	268
19	p13.11	IQCN	NM_001145305	18367905	18385319	0.239181	0.238448	PANCAN	19p	amp	cent	p	1	p	0.95	11753832	19945779	0.172797	0.517446	0.25052	0	inf	0	16	4.00832	268
19	p13.11	JUND	NM_001286968	18390503	18392466	0.23823	0.238148	PANCAN	19p	amp	cent	p	1	p	0.95	11753832	19945779	0.172797	0.517446	0.25052	0	inf	0	16	4.00832	268
19	p13.11	MIR3188	NR_036155	18392886	18392971	0.23813	0.238126	PANCAN	19p	amp	cent	p	1	p	0.95	11753832	19945779	0.172797	0.517446	0.25052	0	inf	0	16	4.00832	268
19	p13.11	LSM4	NM_001252129	18417039	18434001	0.237114	0.2364	PANCAN	19p	amp	cent	p	1	p	0.95	11753832	19945779	0.172797	0.517446	0.25052	0	inf	0	16	4.00832	268
19	p13.11	PGPEP1	NM_017712	18451396	18480763	0.235668	0.234433	PANCAN	19p	amp	cent	p	1	p	0.95	11753832	19945779	0.172797	0.517446	0.25052	0	inf	0	16	4.00832	268
19	p13.11	GDF15	NM_004864	18496769	18499987	0.233759	0.233624	PANCAN	19p	amp	cent	p	1	p	0.95	11753832	19945779	0.172797	0.517446	0.25052	0	inf	0	16	4.00832	268
19	p13.11	MIR3189	NR_036156	18497371	18497444	0.233734	0.233731	PANCAN	19p	amp	cent	p	1	p	0.95	11753832	19945779	0.172797	0.517446	0.25052	0	inf	0	16	4.00832	268
19	p13.11	LRRC25	NM_145256	18501953	18508415	0.233541	0.23327	PANCAN	19p	amp	cent	p	1	p	0.95	11753832	19945779	0.172797	0.517446	0.25052	0	inf	0	16	4.00832	268
19	p13.11	SSBP4	NM_032627	18530145	18545372	0.232355	0.231715	PANCAN	19p	amp	cent	p	1	p	0.95	11753832	19945779	0.172797	0.517446	0.25052	0	inf	0	16	4.00832	268
19	p13.11	ISYNA1	NR_045573	18545197	18549111	0.231722	0.231557	PANCAN	19p	amp	cent	p	1	p	0.95	11753832	19945779	0.172797	0.517446	0.25052	0	inf	0	16	4.00832	268
19	p13.11	ELL	NM_006532	18553472	18632937	0.231374	0.228031	PANCAN	19p	amp	cent	p	1	p	0.95	11753832	19945779	0.172797	0.517446	0.25052	0	inf	0	16	4.00832	268
19	p13.11	FKBP8	NM_001308373	18642561	18654406	0.227626	0.227127	PANCAN	19p	amp	cent	p	1	p	0.95	11753832	19945779	0.172797	0.517446	0.25052	0	inf	0	16	4.00832	268
19	p13.11	KXD1	NM_001171948	18668571	18680197	0.226531	0.226042	PANCAN	19p	amp	cent	p	1	p	0.95	11753832	19945779	0.172797	0.517446	0.25052	0	inf	0	16	4.00832	268
19	p13.11	UBA52	NM_001321017	18682539	18688270	0.225944	0.225703	PANCAN	19p	amp	cent	p	1	p	0.95	11753832	19945779	0.172797	0.517446	0.25052	0	inf	0	16	4.00832	268
19	p13.11	REX1BD	NM_001100419	18699494	18703147	0.22523	0.225077	PANCAN	19p	amp	cent	p	1	p	0.95	11753832	19945779	0.172797	0.517446	0.25052	0	inf	0	16	4.00832	268
19	p13.11	CRLF1	NM_004750	18704034	18717660	0.225039	0.224466	PANCAN	19p	amp	cent	p	1	p	0.95	11753832	19945779	0.172797	0.517446	0.25052	0	inf	0	16	4.00832	268
19	p13.11	TMEM59L	NM_012109	18723681	18731849	0.224213	0.223869	PANCAN	19p	amp	cent	p	1	p	0.95	11753832	19945779	0.172797	0.517446	0.25052	0	inf	0	16	4.00832	268
19	p13.11	KLHL26	NM_018316	18747774	18781309	0.223199	0.221788	PANCAN	19p	amp	cent	p	1	p	0.95	11753832	19945779	0.172797	0.517446	0.25052	0	inf	0	16	4.00832	268
19	p13.11	CRTC1	NM_001098482	18794424	18893143	0.221237	0.217083	PANCAN	19p	amp	cent	p	1	p	0.95	11753832	19945779	0.172797	0.517446	0.25052	0	inf	0	16	4.00832	268
19	p13.11	COMP	NM_000095	18893582	18902114	0.217065	0.216706	PANCAN	19p	amp	cent	p	1	p	0.95	11753832	19945779	0.172797	0.517446	0.25052	0	inf	0	16	4.00832	268
19	p13.11	UPF1	NM_001297549	18942743	18979041	0.214997	0.213469	PANCAN	19p	amp	cent	p	1	p	0.95	11753832	19945779	0.172797	0.517446	0.25052	0	inf	0	16	4.00832	268
19	p13.11	CERS1	NM_021267	18979354	19006953	0.213456	0.212295	PANCAN	19p	amp	cent	p	1	p	0.95	11753832	19945779	0.172797	0.517446	0.25052	0	inf	0	16	4.00832	268
19	p13.11	GDF1	NM_001492	18979354	19006953	0.213456	0.212295	PANCAN	19p	amp	cent	p	1	p	0.95	11753832	19945779	0.172797	0.517446	0.25052	0	inf	0	16	4.00832	268
19	p13.11	COPE	NM_001330469	19010319	19030212	0.212154	0.211317	PANCAN	19p	amp	cent	p	1	p	0.95	11753832	19945779	0.172797	0.517446	0.25052	0	inf	0	16	4.00832	268
19	p13.11	DDX49	NM_019070	19030483	19039442	0.211305	0.210928	PANCAN	19p	amp	cent	p	1	p	0.95	11753832	19945779	0.172797	0.517446	0.25052	0	inf	0	16	4.00832	268
19	p13.11	HOMER3	NM_004838	19040009	19052041	0.210904	0.210398	PANCAN	19p	amp	cent	p	1	p	0.95	11753832	19945779	0.172797	0.517446	0.25052	0	inf	0	16	4.00832	268
19	p13.11	HOMER3-AS1	NR_134913	19051062	19057640	0.210439	0.210163	PANCAN	19p	amp	cent	p	1	p	0.95	11753832	19945779	0.172797	0.517446	0.25052	0	inf	0	16	4.00832	268
19	p13.11	SUGP2	NM_001352071	19101695	19144861	0.208309	0.206493	PANCAN	19p	amp	cent	p	1	p	0.95	11753832	19945779	0.172797	0.517446	0.25052	0	inf	0	16	4.00832	268
19	p13.11	ARMC6	NM_033415	19144386	19168987	0.206513	0.205478	PANCAN	19p	amp	cent	p	1	p	0.95	11753832	19945779	0.172797	0.517446	0.25052	0	inf	0	16	4.00832	268
19	p13.11	SLC25A42	NM_001321544	19174769	19223841	0.205235	0.20317	PANCAN	19p	amp	cent	p	1	p	0.95	11753832	19945779	0.172797	0.517446	0.25052	0	inf	0	16	4.00832	268
19	p13.11	TMEM161A	NM_017814	19230424	19249310	0.202893	0.202099	PANCAN	19p	amp	cent	p	1	p	0.95	11753832	19945779	0.172797	0.517446	0.25052	0	inf	0	16	4.00832	268
19	p13.11	BORCS8-MEF2B	NM_005919	19256375	19303400	0.201802	0.199823	PANCAN	19p	amp	cent	p	1	p	0.95	11753832	19945779	0.172797	0.517446	0.25052	0	inf	0	16	4.00832	268
19	p13.11	MEF2B	NM_001145785	19256375	19281098	0.201802	0.200761	PANCAN	19p	amp	cent	p	1	p	0.95	11753832	19945779	0.172797	0.517446	0.25052	0	inf	0	16	4.00832	268
19	p13.11	BORCS8	NM_001145784	19287712	19303400	0.200483	0.199823	PANCAN	19p	amp	cent	p	1	p	0.95	11753832	19945779	0.172797	0.517446	0.25052	0	inf	0	16	4.00832	268
19	p13.11	RFXANK	NM_001278727	19303007	19312678	0.19984	0.199433	PANCAN	19p	amp	cent	p	1	p	0.95	11753832	19945779	0.172797	0.517446	0.25052	0	inf	0	16	4.00832	268
19	p13.11	NR2C2AP	NM_176880	19312219	19314238	0.199452	0.199367	PANCAN	19p	amp	cent	p	1	p	0.95	11753832	19945779	0.172797	0.517446	0.25052	0	inf	0	16	4.00832	268
19	p13.11	NCAN	NM_004386	19322781	19363061	0.199008	0.197313	PANCAN	19p	amp	cent	p	1	p	0.95	11753832	19945779	0.172797	0.517446	0.25052	0	inf	0	16	4.00832	268
19	p13.11	HAPLN4	NM_023002	19366451	19373596	0.197171	0.19687	PANCAN	19p	amp	cent	p	1	p	0.95	11753832	19945779	0.172797	0.517446	0.25052	0	inf	0	16	4.00832	268
19	p13.11	TM6SF2	NM_001001524	19375173	19384074	0.196804	0.196429	PANCAN	19p	amp	cent	p	1	p	0.95	11753832	19945779	0.172797	0.517446	0.25052	0	inf	0	16	4.00832	268
19	p13.11	SUGP1	NM_172231	19387321	19431321	0.196292	0.194441	PANCAN	19p	amp	cent	p	1	p	0.95	11753832	19945779	0.172797	0.517446	0.25052	0	inf	0	16	4.00832	268
19	p13.11	MAU2	NM_015329	19431629	19469563	0.194428	0.192832	PANCAN	19p	amp	cent	p	1	p	0.95	11753832	19945779	0.172797	0.517446	0.25052	0	inf	0	16	4.00832	268
19	p13.11	GATAD2A	NM_017660	19496611	19619741	0.191694	0.186514	PANCAN	19p	amp	cent	p	1	p	0.95	11753832	19945779	0.172797	0.517446	0.25052	0	inf	0	16	4.00832	268
19	p13.11	MIR640	NR_030370	19545871	19545967	0.189622	0.189618	PANCAN	19p	amp	cent	p	1	p	0.95	11753832	19945779	0.172797	0.517446	0.25052	0	inf	0	16	4.00832	268
19	p13.11	TSSK6	NM_032037	19625027	19626469	0.186292	0.186231	PANCAN	19p	amp	cent	p	1	p	0.95	11753832	19945779	0.172797	0.517446	0.25052	0	inf	0	16	4.00832	268
19	p13.11	NDUFA13	NM_015965	19627018	19639013	0.186208	0.185703	PANCAN	19p	amp	cent	p	1	p	0.95	11753832	19945779	0.172797	0.517446	0.25052	0	inf	0	16	4.00832	268
19	p13.11	YJEFN3	NM_198537	19639669	19648393	0.185676	0.185309	PANCAN	19p	amp	cent	p	1	p	0.95	11753832	19945779	0.172797	0.517446	0.25052	0	inf	0	16	4.00832	268
19	p13.11	CILP2	NM_153221	19649073	19657468	0.18528	0.184927	PANCAN	19p	amp	cent	p	1	p	0.95	11753832	19945779	0.172797	0.517446	0.25052	0	inf	0	16	4.00832	268
19	p13.11	PBX4	NM_025245	19672515	19729725	0.184294	0.181887	PANCAN	19p	amp	cent	p	1	p	0.95	11753832	19945779	0.172797	0.517446	0.25052	0	inf	0	16	4.00832	268
19	p13.11	LPAR2	NM_004720	19734465	19739039	0.181688	0.181495	PANCAN	19p	amp	cent	p	1	p	0.95	11753832	19945779	0.172797	0.517446	0.25052	0	inf	0	16	4.00832	268
19	p13.11	GMIP	NM_001288999	19740281	19754476	0.181443	0.180846	PANCAN	19p	amp	cent	p	1	p	0.95	11753832	19945779	0.172797	0.517446	0.25052	0	inf	0	16	4.00832	268
19	p13.11	ATP13A1	NM_020410	19756009	19774503	0.180781	0.180003	PANCAN	19p	amp	cent	p	1	p	0.95	11753832	19945779	0.172797	0.517446	0.25052	0	inf	0	16	4.00832	268
19	p13.11	ZNF101	NM_001300949	19778961	19794315	0.179816	0.17917	PANCAN	19p	amp	cent	p	1	p	0.95	11753832	19945779	0.172797	0.517446	0.25052	0	inf	0	16	4.00832	268
19	p13.11	ZNF14	NM_021030	19821280	19843921	0.178035	0.177083	PANCAN	19p	amp	cent	p	1	p	0.95	11753832	19945779	0.172797	0.517446	0.25052	0	inf	0	16	4.00832	268
19	p13.11	LINC00663	NR_026956	19867180	19887222	0.176104	0.175261	PANCAN	19p	amp	cent	p	1	p	0.95	11753832	19945779	0.172797	0.517446	0.25052	0	inf	0	16	4.00832	268
19	p13.11	ZNF56	NM_001355194	19887375	19946988	0.175254	0.172746	PANCAN	19p	amp	cent	p	1	p	0.95	11753832	19945779	0.172797	0.517446	0.25052	0	inf	0	16	4.00832	268
19	p13.11	ZNF506	NM_001099269	19903519	19932560	0.174575	0.173353	PANCAN	19p	amp	cent	p	1	p	0.95	11753832	19945779	0.172797	0.517446	0.25052	0	inf	0	16	4.00832	268
3	q26.2	TERC	NR_001566	169482397	169482848	0.270281	0.270277	PANCAN	3q	amp	tel	p	1	p	0.95	169384296	170516109	0.260323	0.271226	0.248217	0	inf	0	16	3.97148	17
3	q26.2	ACTRT3	NM_032487	169484710	169487683	0.270259	0.27023	PANCAN	3q	amp	tel	p	1	p	0.95	169384296	170516109	0.260323	0.271226	0.248217	0	inf	0	16	3.97148	17
3	q26.2	MYNN	NM_018657	169490852	169507504	0.2702	0.270039	PANCAN	3q	amp	tel	p	1	p	0.95	169384296	170516109	0.260323	0.271226	0.248217	0	inf	0	16	3.97148	17
3	q26.2	LRRC34	NM_153353	169511215	169530574	0.270004	0.269817	PANCAN	3q	amp	tel	p	1	p	0.95	169384296	170516109	0.260323	0.271226	0.248217	0	inf	0	16	3.97148	17
3	q26.2	LRRIQ4	NM_001080460	169539678	169555560	0.269729	0.269576	PANCAN	3q	amp	tel	p	1	p	0.95	169384296	170516109	0.260323	0.271226	0.248217	0	inf	0	16	3.97148	17
3	q26.2	LRRC31	NM_001277127	169557028	169587723	0.269562	0.269267	PANCAN	3q	amp	tel	p	1	p	0.95	169384296	170516109	0.260323	0.271226	0.248217	0	inf	0	16	3.97148	17
3	q26.2	SAMD7	NM_001304366	169629359	169656956	0.268866	0.2686	PANCAN	3q	amp	tel	p	1	p	0.95	169384296	170516109	0.260323	0.271226	0.248217	0	inf	0	16	3.97148	17
3	q26.2	LOC100128164	NR_027622	169661771	169684522	0.268553	0.268334	PANCAN	3q	amp	tel	p	1	p	0.95	169384296	170516109	0.260323	0.271226	0.248217	0	inf	0	16	3.97148	17
3	q26.2	SEC62	NM_003262	169684579	169716161	0.268334	0.268029	PANCAN	3q	amp	tel	p	1	p	0.95	169384296	170516109	0.260323	0.271226	0.248217	0	inf	0	16	3.97148	17
3	q26.2	GPR160	NM_014373	169755734	169803183	0.267648	0.267191	PANCAN	3q	amp	tel	p	1	p	0.95	169384296	170516109	0.260323	0.271226	0.248217	0	inf	0	16	3.97148	17
3	q26.2	PHC3	NM_024947	169805367	169899537	0.26717	0.266263	PANCAN	3q	amp	tel	p	1	p	0.95	169384296	170516109	0.260323	0.271226	0.248217	0	inf	0	16	3.97148	17
3	q26.2	PRKCI	NM_002740	169940219	170023770	0.265871	0.265066	PANCAN	3q	amp	tel	p	1	p	0.95	169384296	170516109	0.260323	0.271226	0.248217	0	inf	0	16	3.97148	17
3	q26.2	SKIL	NM_001145098	170075472	170114637	0.264568	0.264191	PANCAN	3q	amp	tel	p	1	p	0.95	169384296	170516109	0.260323	0.271226	0.248217	0	inf	0	16	3.97148	17
3	q26.2	CLDN11	NM_005602	170136652	170152479	0.263978	0.263826	PANCAN	3q	amp	tel	p	1	p	0.95	169384296	170516109	0.260323	0.271226	0.248217	0	inf	0	16	3.97148	17
3	q26.2	MIR6828	NR_106886	170140890	170140950	0.263938	0.263937	PANCAN	3q	amp	tel	p	1	p	0.95	169384296	170516109	0.260323	0.271226	0.248217	0	inf	0	16	3.97148	17
3	q26.2	SLC7A14	NM_020949	170177341	170303863	0.263587	0.262368	PANCAN	3q	amp	tel	p	1	p	0.95	169384296	170516109	0.260323	0.271226	0.248217	0	inf	0	16	3.97148	17
3	q26.2	LOC101928583	NR_135556	170185072	170472994	0.263512	0.260738	PANCAN	3q	amp	tel	p	1	p	0.95	169384296	170516109	0.260323	0.271226	0.248217	0	inf	0	16	3.97148	17
8	q22.3	NACAP1	NR_002182	102381120	102381823	0.438281	0.438273	PANCAN	8q	amp	tel	p	1	p	0.95	102319239	103298753	0.428895	0.438914	0.248112	0	inf	0	16	3.96979	8
8	q22.3	GRHL2	NM_001330593	102504666	102681952	0.437017	0.435204	PANCAN	8q	amp	tel	p	1	p	0.95	102319239	103298753	0.428895	0.438914	0.248112	0	inf	0	16	3.96979	8
8	q22.3	NCALD	NM_001040630	102698769	103137135	0.435032	0.430548	PANCAN	8q	amp	tel	p	1	p	0.95	102319239	103298753	0.428895	0.438914	0.248112	0	inf	0	16	3.96979	8
8	q22.3	LOC104054148	NR_126152	102996659	103007078	0.431985	0.431878	PANCAN	8q	amp	tel	p	1	p	0.95	102319239	103298753	0.428895	0.438914	0.248112	0	inf	0	16	3.96979	8
8	q22.3	MIR5680	NR_049859	103137659	103137743	0.430543	0.430542	PANCAN	8q	amp	tel	p	1	p	0.95	102319239	103298753	0.428895	0.438914	0.248112	0	inf	0	16	3.96979	8
8	q22.3	RRM2B	NM_001172478	103216728	103251346	0.429734	0.42938	PANCAN	8q	amp	tel	p	1	p	0.95	102319239	103298753	0.428895	0.438914	0.248112	0	inf	0	16	3.96979	8
8	q22.3	UBR5-AS1	NR_125415	103251678	103264402	0.429377	0.429246	PANCAN	8q	amp	tel	p	1	p	0.95	102319239	103298753	0.428895	0.438914	0.248112	0	inf	0	16	3.96979	8
8	q22.3	UBR5	NM_001282873	103264501	103424917	0.429245	0.427605	PANCAN	8q	amp	tel	p	1	p	0.95	102319239	103298753	0.428895	0.438914	0.248112	0	inf	0	16	3.96979	8
17	p12	CDRT15P1	NR_003261	13927814	13928915	0.636898	0.636952	PANCAN	17p	del	tel	p	1	p	0.95	13807528	15694785	0.630977	0.723863	0.245383	0	inf	0	16	3.92613	22
17	p12	COX10-AS1	NR_049718	13932608	13972775	0.637133	0.63911	PANCAN	17p	del	tel	p	1	p	0.95	13807528	15694785	0.630977	0.723863	0.245383	0	inf	0	16	3.92613	22
17	p12	COX10	NM_001303	13972718	14111996	0.639108	0.645962	PANCAN	17p	del	tel	p	1	p	0.95	13807528	15694785	0.630977	0.723863	0.245383	0	inf	0	16	3.92613	22
17	p12	CDRT15	NM_001348781	14138989	14140179	0.647291	0.64735	PANCAN	17p	del	tel	p	1	p	0.95	13807528	15694785	0.630977	0.723863	0.245383	0	inf	0	16	3.92613	22
17	p12	HS3ST3B1	NR_130138	14204366	14252721	0.650509	0.652889	PANCAN	17p	del	tel	p	1	p	0.95	13807528	15694785	0.630977	0.723863	0.245383	0	inf	0	16	3.92613	22
17	p12	MGC12916	NR_026880	14207056	14209062	0.650641	0.65074	PANCAN	17p	del	tel	p	1	p	0.95	13807528	15694785	0.630977	0.723863	0.245383	0	inf	0	16	3.92613	22
17	p12	LOC101928475	NR_135638	14918121	14955592	0.685638	0.687482	PANCAN	17p	del	tel	p	1	p	0.95	13807528	15694785	0.630977	0.723863	0.245383	0	inf	0	16	3.92613	22
17	p12	CDRT7	NR_033371	14934291	14935274	0.686433	0.686482	PANCAN	17p	del	tel	p	1	p	0.95	13807528	15694785	0.630977	0.723863	0.245383	0	inf	0	16	3.92613	22
17	p12	CDRT8	NR_103559	15008301	15009504	0.690076	0.690135	PANCAN	17p	del	tel	p	1	p	0.95	13807528	15694785	0.630977	0.723863	0.245383	0	inf	0	16	3.92613	22
17	p12	PMP22	NR_104018	15133093	15168674	0.696218	0.697969	PANCAN	17p	del	tel	p	1	p	0.95	13807528	15694785	0.630977	0.723863	0.245383	0	inf	0	16	3.92613	22
17	p12	MIR4731	NR_039884	15154943	15155013	0.697293	0.697297	PANCAN	17p	del	tel	p	1	p	0.95	13807528	15694785	0.630977	0.723863	0.245383	0	inf	0	16	3.92613	22
17	p12	TEKT3	NM_031898	15207128	15244958	0.699862	0.701723	PANCAN	17p	del	tel	p	1	p	0.95	13807528	15694785	0.630977	0.723863	0.245383	0	inf	0	16	3.92613	22
17	p12	CDRT4	NM_001204477	15339331	15370925	0.706368	0.707923	PANCAN	17p	del	tel	p	1	p	0.95	13807528	15694785	0.630977	0.723863	0.245383	0	inf	0	16	3.92613	22
17	p12	TVP23C-CDRT4	NM_001204478	15339331	15466945	0.706368	0.712649	PANCAN	17p	del	tel	p	1	p	0.95	13807528	15694785	0.630977	0.723863	0.245383	0	inf	0	16	3.92613	22
17	p12	CDRT3	NR_146601	15373624	15374150	0.708056	0.708082	PANCAN	17p	del	tel	p	1	p	0.95	13807528	15694785	0.630977	0.723863	0.245383	0	inf	0	16	3.92613	22
17	p12	TVP23C	NM_145301	15405577	15466945	0.709629	0.712649	PANCAN	17p	del	tel	p	1	p	0.95	13807528	15694785	0.630977	0.723863	0.245383	0	inf	0	16	3.92613	22
17	p12	CDRT1	NM_001282540	15468795	15523018	0.71274	0.715409	PANCAN	17p	del	tel	p	1	p	0.95	13807528	15694785	0.630977	0.723863	0.245383	0	inf	0	16	3.92613	22
17	p12	TRIM16	NM_001348122	15531279	15587625	0.715815	0.718589	PANCAN	17p	del	tel	p	1	p	0.95	13807528	15694785	0.630977	0.723863	0.245383	0	inf	0	16	3.92613	22
17	p12	ZNF286A	NM_001288644	15602890	15624100	0.71934	0.720384	PANCAN	17p	del	tel	p	1	p	0.95	13807528	15694785	0.630977	0.723863	0.245383	0	inf	0	16	3.92613	22
17	p12	TBC1D26	NM_178571	15635590	15648098	0.720949	0.721565	PANCAN	17p	del	tel	p	1	p	0.95	13807528	15694785	0.630977	0.723863	0.245383	0	inf	0	16	3.92613	22
17	p12	CDRT15P2	NR_033865	15668016	15669003	0.722545	0.722594	PANCAN	17p	del	tel	p	1	p	0.95	13807528	15694785	0.630977	0.723863	0.245383	0	inf	0	16	3.92613	22
17	p12	MEIS3P1	NR_002211	15690163	15693019	0.723635	0.723776	PANCAN	17p	del	tel	p	1	p	0.95	13807528	15694785	0.630977	0.723863	0.245383	0	inf	0	16	3.92613	22
1	p13.3	AHCYL1	NM_001242673	110527386	110566364	0.914755	0.915087	PANCAN	1p	del	tel	p	2	n-rp	0.95	110485495	111421427	0.914398	0.922376	0.242503	0	inf	0	16	3.88004	20
1	p13.3	STRIP1	NM_001270768	110574198	110597263	0.915154	0.915351	PANCAN	1p	del	tel	p	2	n-rp	0.95	110485495	111421427	0.914398	0.922376	0.242503	0	inf	0	16	3.88004	20
1	p13.3	ALX3	NM_006492	110602996	110613322	0.9154	0.915488	PANCAN	1p	del	tel	p	2	n-rp	0.95	110485495	111421427	0.914398	0.922376	0.242503	0	inf	0	16	3.88004	20
1	p13.3	LINC01397	NR_126382	110625309	110652341	0.91559	0.91582	PANCAN	1p	del	tel	p	2	n-rp	0.95	110485495	111421427	0.914398	0.922376	0.242503	0	inf	0	16	3.88004	20
1	p13.3	UBL4B	NM_203412	110655061	110656569	0.915843	0.915856	PANCAN	1p	del	tel	p	2	n-rp	0.95	110485495	111421427	0.914398	0.922376	0.242503	0	inf	0	16	3.88004	20
1	p13.3	SLC6A17	NM_001010898	110693135	110744823	0.916168	0.916609	PANCAN	1p	del	tel	p	2	n-rp	0.95	110485495	111421427	0.914398	0.922376	0.242503	0	inf	0	16	3.88004	20
1	p13.3	KCNC4-AS1	NR_046546	110751072	110752609	0.916662	0.916675	PANCAN	1p	del	tel	p	2	n-rp	0.95	110485495	111421427	0.914398	0.922376	0.242503	0	inf	0	16	3.88004	20
1	p13.3	KCNC4	NR_036437	110753335	110776674	0.916681	0.91688	PANCAN	1p	del	tel	p	2	n-rp	0.95	110485495	111421427	0.914398	0.922376	0.242503	0	inf	0	16	3.88004	20
1	p13.3	RBM15-AS1	NR_036595	110828998	110881793	0.917326	0.917776	PANCAN	1p	del	tel	p	2	n-rp	0.95	110485495	111421427	0.914398	0.922376	0.242503	0	inf	0	16	3.88004	20
1	p13.3	RBM15	NM_001201545	110881944	110889303	0.917778	0.91784	PANCAN	1p	del	tel	p	2	n-rp	0.95	110485495	111421427	0.914398	0.922376	0.242503	0	inf	0	16	3.88004	20
1	p13.3	SLC16A4	NM_001319220	110905472	110933704	0.917978	0.918219	PANCAN	1p	del	tel	p	2	n-rp	0.95	110485495	111421427	0.914398	0.922376	0.242503	0	inf	0	16	3.88004	20
1	p13.3	LAMTOR5	NM_006402	110943876	110950546	0.918305	0.918362	PANCAN	1p	del	tel	p	2	n-rp	0.95	110485495	111421427	0.914398	0.922376	0.242503	0	inf	0	16	3.88004	20
1	p13.3	LAMTOR5-AS1	NR_102697	110950430	110958896	0.918361	0.918433	PANCAN	1p	del	tel	p	2	n-rp	0.95	110485495	111421427	0.914398	0.922376	0.242503	0	inf	0	16	3.88004	20
1	p13.3	PROK1	NM_032414	110993787	110999976	0.918731	0.918784	PANCAN	1p	del	tel	p	2	n-rp	0.95	110485495	111421427	0.914398	0.922376	0.242503	0	inf	0	16	3.88004	20
1	p13.3	CYMP	NR_003599	111023387	111033891	0.918983	0.919073	PANCAN	1p	del	tel	p	2	n-rp	0.95	110485495	111421427	0.914398	0.922376	0.242503	0	inf	0	16	3.88004	20
1	p13.3	CYMP-AS1	NR_108042	111030301	111032880	0.919042	0.919064	PANCAN	1p	del	tel	p	2	n-rp	0.95	110485495	111421427	0.914398	0.922376	0.242503	0	inf	0	16	3.88004	20
1	p13.3	KCNA10	NM_005549	111059838	111061797	0.919294	0.919311	PANCAN	1p	del	tel	p	2	n-rp	0.95	110485495	111421427	0.914398	0.922376	0.242503	0	inf	0	16	3.88004	20
1	p13.3	KCNA2	NM_001204269	111136201	111174096	0.919945	0.920268	PANCAN	1p	del	tel	p	2	n-rp	0.95	110485495	111421427	0.914398	0.922376	0.242503	0	inf	0	16	3.88004	20
1	p13.3	KCNA3	NR_109845	111196185	111216076	0.920456	0.920626	PANCAN	1p	del	tel	p	2	n-rp	0.95	110485495	111421427	0.914398	0.922376	0.242503	0	inf	0	16	3.88004	20
1	p13.3	CD53	NM_001040033	111413820	111442558	0.922311	0.922556	PANCAN	1p	del	tel	p	2	n-rp	0.95	110485495	111421427	0.914398	0.922376	0.242503	0	inf	0	16	3.88004	20
11	q13.3	PPFIA1	NM_003626	70116805	70230607	0.81949	0.818034	PANCAN	11q	del	tel	n	2	p-rn	0.95	70071718	70240415	0.817908	0.820067	0.238073	0	inf	0	16	3.80916	2
11	q13.3	MIR548K	NR_031624	70130060	70130176	0.81932	0.819319	PANCAN	11q	del	tel	n	2	p-rn	0.95	70071718	70240415	0.817908	0.820067	0.238073	0	inf	0	16	3.80916	2
3	p23	MIR466	NR_130459	31203195	31203279	0.671581	0.67158	PANCAN	3p	del	cent	p	1	p	0.95	31013358	59701429	0.348741	0.673732	0.237521	0	inf	0	16	3.80033	405
3	p23	STT3B	NM_178862	31573992	31679114	0.667381	0.66619	PANCAN	3p	del	cent	p	1	p	0.95	31013358	59701429	0.348741	0.673732	0.237521	0	inf	0	16	3.80033	405
3	p23	OSBPL10	NM_017784	31702316	32023342	0.665927	0.66229	PANCAN	3p	del	cent	p	1	p	0.95	31013358	59701429	0.348741	0.673732	0.237521	0	inf	0	16	3.80033	405
3	p23	OSBPL10-AS1	NR_049771	31745704	31763078	0.665436	0.665239	PANCAN	3p	del	cent	p	1	p	0.95	31013358	59701429	0.348741	0.673732	0.237521	0	inf	0	16	3.80033	405
3	p23	ZNF860	NM_001137674	32023265	32033228	0.662291	0.662178	PANCAN	3p	del	cent	p	1	p	0.95	31013358	59701429	0.348741	0.673732	0.237521	0	inf	0	16	3.80033	405
3	p22.3	GPD1L	NM_015141	32148002	32210207	0.660878	0.660174	PANCAN	3p	del	cent	p	1	p	0.95	31013358	59701429	0.348741	0.673732	0.237521	0	inf	0	16	3.80033	405
3	p22.3	CMTM8	NM_001320308	32280170	32411817	0.659381	0.65789	PANCAN	3p	del	cent	p	1	p	0.95	31013358	59701429	0.348741	0.673732	0.237521	0	inf	0	16	3.80033	405
3	p22.3	CMTM7	NM_181472	32433162	32497020	0.657648	0.656924	PANCAN	3p	del	cent	p	1	p	0.95	31013358	59701429	0.348741	0.673732	0.237521	0	inf	0	16	3.80033	405
3	p22.3	CMTM6	NM_017801	32522803	32544403	0.656632	0.656388	PANCAN	3p	del	cent	p	1	p	0.95	31013358	59701429	0.348741	0.673732	0.237521	0	inf	0	16	3.80033	405
3	p22.3	MIR548AY	NR_106753	32547774	32547881	0.656349	0.656348	PANCAN	3p	del	cent	p	1	p	0.95	31013358	59701429	0.348741	0.673732	0.237521	0	inf	0	16	3.80033	405
3	p22.3	DYNC1LI1	NM_001329135	32567462	32612416	0.656126	0.655617	PANCAN	3p	del	cent	p	1	p	0.95	31013358	59701429	0.348741	0.673732	0.237521	0	inf	0	16	3.80033	405
3	p22.3	CNOT10	NM_015442	32726636	32815367	0.654323	0.653318	PANCAN	3p	del	cent	p	1	p	0.95	31013358	59701429	0.348741	0.673732	0.237521	0	inf	0	16	3.80033	405
3	p22.3	TRIM71	NM_001039111	32859509	32939318	0.652818	0.651914	PANCAN	3p	del	cent	p	1	p	0.95	31013358	59701429	0.348741	0.673732	0.237521	0	inf	0	16	3.80033	405
3	p22.3	CCR4	NM_005508	32993065	32996403	0.651305	0.651267	PANCAN	3p	del	cent	p	1	p	0.95	31013358	59701429	0.348741	0.673732	0.237521	0	inf	0	16	3.80033	405
3	p22.3	GLB1	NM_001135602	33038099	33138722	0.650795	0.649655	PANCAN	3p	del	cent	p	1	p	0.95	31013358	59701429	0.348741	0.673732	0.237521	0	inf	0	16	3.80033	405
3	p22.3	TMPPE	NM_001136238	33131907	33138293	0.649732	0.64966	PANCAN	3p	del	cent	p	1	p	0.95	31013358	59701429	0.348741	0.673732	0.237521	0	inf	0	16	3.80033	405
3	p22.3	CRTAP	NM_006371	33155449	33189265	0.649465	0.649082	PANCAN	3p	del	cent	p	1	p	0.95	31013358	59701429	0.348741	0.673732	0.237521	0	inf	0	16	3.80033	405
3	p22.3	SUSD5	NM_015551	33191536	33260707	0.649057	0.648273	PANCAN	3p	del	cent	p	1	p	0.95	31013358	59701429	0.348741	0.673732	0.237521	0	inf	0	16	3.80033	405
3	p22.3	FBXL2	NR_146132	33318907	33464190	0.647614	0.645968	PANCAN	3p	del	cent	p	1	p	0.95	31013358	59701429	0.348741	0.673732	0.237521	0	inf	0	16	3.80033	405
3	p22.3	UBP1	NM_001128161	33429828	33481897	0.646357	0.645767	PANCAN	3p	del	cent	p	1	p	0.95	31013358	59701429	0.348741	0.673732	0.237521	0	inf	0	16	3.80033	405
3	p22.3	CLASP2	NM_015097	33537738	33759705	0.645135	0.64262	PANCAN	3p	del	cent	p	1	p	0.95	31013358	59701429	0.348741	0.673732	0.237521	0	inf	0	16	3.80033	405
3	p22.3	PDCD6IP	NM_001162429	33840062	33911199	0.64171	0.640904	PANCAN	3p	del	cent	p	1	p	0.95	31013358	59701429	0.348741	0.673732	0.237521	0	inf	0	16	3.80033	405
3	p22.3	LOC101928135	NR_110817	34917288	35435515	0.629506	0.623636	PANCAN	3p	del	cent	p	1	p	0.95	31013358	59701429	0.348741	0.673732	0.237521	0	inf	0	16	3.80033	405
3	p22.3	ARPP21	NM_001267617	35682509	35835988	0.620838	0.619099	PANCAN	3p	del	cent	p	1	p	0.95	31013358	59701429	0.348741	0.673732	0.237521	0	inf	0	16	3.80033	405
3	p22.3	MIR128-2	NR_029824	35785967	35786051	0.619666	0.619665	PANCAN	3p	del	cent	p	1	p	0.95	31013358	59701429	0.348741	0.673732	0.237521	0	inf	0	16	3.80033	405
3	p22.2	STAC	NM_003149	36421978	36589498	0.612461	0.610563	PANCAN	3p	del	cent	p	1	p	0.95	31013358	59701429	0.348741	0.673732	0.237521	0	inf	0	16	3.80033	405
3	p22.2	DCLK3	NM_033403	36753912	36781352	0.6087	0.60839	PANCAN	3p	del	cent	p	1	p	0.95	31013358	59701429	0.348741	0.673732	0.237521	0	inf	0	16	3.80033	405
3	p22.2	LINC02033	NR_147141	36862040	36863991	0.607475	0.607453	PANCAN	3p	del	cent	p	1	p	0.95	31013358	59701429	0.348741	0.673732	0.237521	0	inf	0	16	3.80033	405
3	p22.2	TRANK1	NM_014831	36868307	36986548	0.607404	0.606065	PANCAN	3p	del	cent	p	1	p	0.95	31013358	59701429	0.348741	0.673732	0.237521	0	inf	0	16	3.80033	405
3	p22.2	EPM2AIP1	NM_014805	37027356	37034795	0.605603	0.605518	PANCAN	3p	del	cent	p	1	p	0.95	31013358	59701429	0.348741	0.673732	0.237521	0	inf	0	16	3.80033	405
3	p22.2	MLH1	NM_001354615	37034840	37092337	0.605518	0.604867	PANCAN	3p	del	cent	p	1	p	0.95	31013358	59701429	0.348741	0.673732	0.237521	0	inf	0	16	3.80033	405
3	p22.2	LRRFIP2	NM_001348302	37094116	37217851	0.604846	0.603445	PANCAN	3p	del	cent	p	1	p	0.95	31013358	59701429	0.348741	0.673732	0.237521	0	inf	0	16	3.80033	405
3	p22.2	LOC152048	NR_149029	37283282	37285686	0.602703	0.602676	PANCAN	3p	del	cent	p	1	p	0.95	31013358	59701429	0.348741	0.673732	0.237521	0	inf	0	16	3.80033	405
3	p22.2	GOLGA4	NM_001172713	37284681	37408370	0.602688	0.601286	PANCAN	3p	del	cent	p	1	p	0.95	31013358	59701429	0.348741	0.673732	0.237521	0	inf	0	16	3.80033	405
3	p22.2	C3orf35	NM_178339	37440967	37476988	0.600917	0.600509	PANCAN	3p	del	cent	p	1	p	0.95	31013358	59701429	0.348741	0.673732	0.237521	0	inf	0	16	3.80033	405
3	p22.2	ITGA9	NM_002207	37493812	37861281	0.600318	0.596156	PANCAN	3p	del	cent	p	1	p	0.95	31013358	59701429	0.348741	0.673732	0.237521	0	inf	0	16	3.80033	405
3	p22.2	ITGA9-AS1	NR_110531	37795179	37903271	0.596904	0.59568	PANCAN	3p	del	cent	p	1	p	0.95	31013358	59701429	0.348741	0.673732	0.237521	0	inf	0	16	3.80033	405
3	p22.2	CTDSPL	NM_005808	37903668	38025960	0.595675	0.59429	PANCAN	3p	del	cent	p	1	p	0.95	31013358	59701429	0.348741	0.673732	0.237521	0	inf	0	16	3.80033	405
3	p22.2	MIR26A1	NR_029499	38010894	38010971	0.594461	0.59446	PANCAN	3p	del	cent	p	1	p	0.95	31013358	59701429	0.348741	0.673732	0.237521	0	inf	0	16	3.80033	405
3	p22.2	VILL	NM_015873	38035077	38048676	0.594187	0.594033	PANCAN	3p	del	cent	p	1	p	0.95	31013358	59701429	0.348741	0.673732	0.237521	0	inf	0	16	3.80033	405
3	p22.2	PLCD1	NM_006225	38048986	38071154	0.594029	0.593778	PANCAN	3p	del	cent	p	1	p	0.95	31013358	59701429	0.348741	0.673732	0.237521	0	inf	0	16	3.80033	405
3	p22.2	DLEC1	NM_007337	38080695	38164232	0.59367	0.592724	PANCAN	3p	del	cent	p	1	p	0.95	31013358	59701429	0.348741	0.673732	0.237521	0	inf	0	16	3.80033	405
3	p22.2	ACAA1	NM_001130410	38164200	38178733	0.592724	0.592559	PANCAN	3p	del	cent	p	1	p	0.95	31013358	59701429	0.348741	0.673732	0.237521	0	inf	0	16	3.80033	405
3	p22.2	MYD88	NM_001172566	38179968	38184512	0.592545	0.592494	PANCAN	3p	del	cent	p	1	p	0.95	31013358	59701429	0.348741	0.673732	0.237521	0	inf	0	16	3.80033	405
3	p22.2	OXSR1	NM_005109	38207025	38296979	0.592239	0.59122	PANCAN	3p	del	cent	p	1	p	0.95	31013358	59701429	0.348741	0.673732	0.237521	0	inf	0	16	3.80033	405
3	p22.2	SLC22A13	NM_004256	38307297	38319806	0.591103	0.590961	PANCAN	3p	del	cent	p	1	p	0.95	31013358	59701429	0.348741	0.673732	0.237521	0	inf	0	16	3.80033	405
3	p22.2	SLC22A14	NM_001320033	38323784	38360066	0.590916	0.590505	PANCAN	3p	del	cent	p	1	p	0.95	31013358	59701429	0.348741	0.673732	0.237521	0	inf	0	16	3.80033	405
3	p22.2	XYLB	NM_001349178	38388250	38468674	0.590186	0.589275	PANCAN	3p	del	cent	p	1	p	0.95	31013358	59701429	0.348741	0.673732	0.237521	0	inf	0	16	3.80033	405
3	p22.2	ACVR2B-AS1	NR_028389	38492517	38496311	0.589005	0.588962	PANCAN	3p	del	cent	p	1	p	0.95	31013358	59701429	0.348741	0.673732	0.237521	0	inf	0	16	3.80033	405
3	p22.2	ACVR2B	NM_001106	38495789	38534633	0.588968	0.588528	PANCAN	3p	del	cent	p	1	p	0.95	31013358	59701429	0.348741	0.673732	0.237521	0	inf	0	16	3.80033	405
3	p22.2	EXOG	NM_001318958	38537762	38567796	0.588492	0.588152	PANCAN	3p	del	cent	p	1	p	0.95	31013358	59701429	0.348741	0.673732	0.237521	0	inf	0	16	3.80033	405
3	p22.2	SCN5A	NM_001160161	38589552	38691164	0.587905	0.586754	PANCAN	3p	del	cent	p	1	p	0.95	31013358	59701429	0.348741	0.673732	0.237521	0	inf	0	16	3.80033	405
3	p22.2	SCN10A	NM_001293306	38738836	38835501	0.586214	0.585119	PANCAN	3p	del	cent	p	1	p	0.95	31013358	59701429	0.348741	0.673732	0.237521	0	inf	0	16	3.80033	405
3	p22.2	SCN11A	NM_001349253	38887259	39093436	0.584533	0.582197	PANCAN	3p	del	cent	p	1	p	0.95	31013358	59701429	0.348741	0.673732	0.237521	0	inf	0	16	3.80033	405
3	p22.2	WDR48	NM_020839	39093476	39138161	0.582197	0.581691	PANCAN	3p	del	cent	p	1	p	0.95	31013358	59701429	0.348741	0.673732	0.237521	0	inf	0	16	3.80033	405
3	p22.2	GORASP1	NM_031899	39138089	39149854	0.581691	0.581558	PANCAN	3p	del	cent	p	1	p	0.95	31013358	59701429	0.348741	0.673732	0.237521	0	inf	0	16	3.80033	405
3	p22.2	TTC21A	NM_145755	39149151	39180394	0.581566	0.581212	PANCAN	3p	del	cent	p	1	p	0.95	31013358	59701429	0.348741	0.673732	0.237521	0	inf	0	16	3.80033	405
3	p22.2	MIR6822	NR_106880	39179696	39179757	0.58122	0.581219	PANCAN	3p	del	cent	p	1	p	0.95	31013358	59701429	0.348741	0.673732	0.237521	0	inf	0	16	3.80033	405
3	p22.2	CSRNP1	NM_001320560	39183341	39196093	0.581179	0.581034	PANCAN	3p	del	cent	p	1	p	0.95	31013358	59701429	0.348741	0.673732	0.237521	0	inf	0	16	3.80033	405
3	p22.2	XIRP1	NM_001351377	39224700	39234087	0.58071	0.580604	PANCAN	3p	del	cent	p	1	p	0.95	31013358	59701429	0.348741	0.673732	0.237521	0	inf	0	16	3.80033	405
3	p22.2	CX3CR1	NM_001171174	39304984	39323226	0.579801	0.579594	PANCAN	3p	del	cent	p	1	p	0.95	31013358	59701429	0.348741	0.673732	0.237521	0	inf	0	16	3.80033	405
3	p22.2	CCR8	NM_005201	39371196	39375171	0.579051	0.579006	PANCAN	3p	del	cent	p	1	p	0.95	31013358	59701429	0.348741	0.673732	0.237521	0	inf	0	16	3.80033	405
3	p22.1	SLC25A38	NM_017875	39424814	39438842	0.578443	0.578284	PANCAN	3p	del	cent	p	1	p	0.95	31013358	59701429	0.348741	0.673732	0.237521	0	inf	0	16	3.80033	405
3	p22.1	RPSA	NM_002295	39448179	39454032	0.578179	0.578112	PANCAN	3p	del	cent	p	1	p	0.95	31013358	59701429	0.348741	0.673732	0.237521	0	inf	0	16	3.80033	405
3	p22.1	SNORA6	NR_002325	39449881	39450030	0.578159	0.578158	PANCAN	3p	del	cent	p	1	p	0.95	31013358	59701429	0.348741	0.673732	0.237521	0	inf	0	16	3.80033	405
3	p22.1	SNORA62	NR_002324	39452544	39452698	0.578129	0.578127	PANCAN	3p	del	cent	p	1	p	0.95	31013358	59701429	0.348741	0.673732	0.237521	0	inf	0	16	3.80033	405
3	p22.1	MOBP	NR_003090	39509063	39570988	0.577489	0.576787	PANCAN	3p	del	cent	p	1	p	0.95	31013358	59701429	0.348741	0.673732	0.237521	0	inf	0	16	3.80033	405
3	p22.1	MYRIP	NM_001284423	39850404	40301811	0.573622	0.568508	PANCAN	3p	del	cent	p	1	p	0.95	31013358	59701429	0.348741	0.673732	0.237521	0	inf	0	16	3.80033	405
3	p22.1	EIF1B-AS1	NR_033965	40214637	40351189	0.569496	0.567949	PANCAN	3p	del	cent	p	1	p	0.95	31013358	59701429	0.348741	0.673732	0.237521	0	inf	0	16	3.80033	405
3	p22.1	EIF1B	NM_005875	40351172	40353915	0.567949	0.567918	PANCAN	3p	del	cent	p	1	p	0.95	31013358	59701429	0.348741	0.673732	0.237521	0	inf	0	16	3.80033	405
3	p22.1	ENTPD3	NM_001248	40428646	40470117	0.567071	0.566602	PANCAN	3p	del	cent	p	1	p	0.95	31013358	59701429	0.348741	0.673732	0.237521	0	inf	0	16	3.80033	405
3	p22.1	ENTPD3-AS1	NR_040100	40432441	40494799	0.567028	0.566322	PANCAN	3p	del	cent	p	1	p	0.95	31013358	59701429	0.348741	0.673732	0.237521	0	inf	0	16	3.80033	405
3	p22.1	RPL14	NM_003973	40498782	40503863	0.566277	0.566219	PANCAN	3p	del	cent	p	1	p	0.95	31013358	59701429	0.348741	0.673732	0.237521	0	inf	0	16	3.80033	405
3	p22.1	ZNF619	NM_001145082	40518603	40531728	0.566052	0.565904	PANCAN	3p	del	cent	p	1	p	0.95	31013358	59701429	0.348741	0.673732	0.237521	0	inf	0	16	3.80033	405
3	p22.1	ZNF620	NM_001256167	40547529	40559712	0.565725	0.565587	PANCAN	3p	del	cent	p	1	p	0.95	31013358	59701429	0.348741	0.673732	0.237521	0	inf	0	16	3.80033	405
3	p22.1	ZNF621	NM_001287245	40566368	40581285	0.565511	0.565342	PANCAN	3p	del	cent	p	1	p	0.95	31013358	59701429	0.348741	0.673732	0.237521	0	inf	0	16	3.80033	405
3	p22.1	CTNNB1	NM_001330729	41240914	41281944	0.55787	0.557405	PANCAN	3p	del	cent	p	1	p	0.95	31013358	59701429	0.348741	0.673732	0.237521	0	inf	0	16	3.80033	405
3	p22.1	ULK4	NM_017886	41288089	42003932	0.557335	0.549226	PANCAN	3p	del	cent	p	1	p	0.95	31013358	59701429	0.348741	0.673732	0.237521	0	inf	0	16	3.80033	405
3	p22.1	TRAK1	NR_146089	42128691	42267382	0.547813	0.546241	PANCAN	3p	del	cent	p	1	p	0.95	31013358	59701429	0.348741	0.673732	0.237521	0	inf	0	16	3.80033	405
3	p22.1	CCK	NM_000729	42299315	42307687	0.54588	0.545785	PANCAN	3p	del	cent	p	1	p	0.95	31013358	59701429	0.348741	0.673732	0.237521	0	inf	0	16	3.80033	405
3	p22.1	LYZL4	NM_144634	42438569	42452094	0.544302	0.544149	PANCAN	3p	del	cent	p	1	p	0.95	31013358	59701429	0.348741	0.673732	0.237521	0	inf	0	16	3.80033	405
3	p22.1	VIPR1	NM_001251882	42530790	42579065	0.543257	0.542711	PANCAN	3p	del	cent	p	1	p	0.95	31013358	59701429	0.348741	0.673732	0.237521	0	inf	0	16	3.80033	405
3	p22.1	VIPR1-AS1	NR_046654	42572387	42574098	0.542786	0.542767	PANCAN	3p	del	cent	p	1	p	0.95	31013358	59701429	0.348741	0.673732	0.237521	0	inf	0	16	3.80033	405
3	p22.1	SEC22C	NM_001201572	42589458	42642572	0.542593	0.541991	PANCAN	3p	del	cent	p	1	p	0.95	31013358	59701429	0.348741	0.673732	0.237521	0	inf	0	16	3.80033	405
3	p22.1	SS18L2	NM_016305	42623331	42636490	0.542209	0.54206	PANCAN	3p	del	cent	p	1	p	0.95	31013358	59701429	0.348741	0.673732	0.237521	0	inf	0	16	3.80033	405
3	p22.1	NKTR	NM_001349125	42642146	42690233	0.541996	0.541451	PANCAN	3p	del	cent	p	1	p	0.95	31013358	59701429	0.348741	0.673732	0.237521	0	inf	0	16	3.80033	405
3	p22.1	LOC101928323	NR_125400	42653801	42695880	0.541864	0.541387	PANCAN	3p	del	cent	p	1	p	0.95	31013358	59701429	0.348741	0.673732	0.237521	0	inf	0	16	3.80033	405
3	p22.1	ZBTB47	NM_145166	42695175	42709072	0.541395	0.541238	PANCAN	3p	del	cent	p	1	p	0.95	31013358	59701429	0.348741	0.673732	0.237521	0	inf	0	16	3.80033	405
3	p22.1	KLHL40	NM_152393	42727010	42733938	0.541035	0.540956	PANCAN	3p	del	cent	p	1	p	0.95	31013358	59701429	0.348741	0.673732	0.237521	0	inf	0	16	3.80033	405
3	p22.1	HHATL	NM_020707	42734154	42744319	0.540954	0.540838	PANCAN	3p	del	cent	p	1	p	0.95	31013358	59701429	0.348741	0.673732	0.237521	0	inf	0	16	3.80033	405
3	p22.1	HHATL-AS1	NR_146957	42744032	42748257	0.540842	0.540794	PANCAN	3p	del	cent	p	1	p	0.95	31013358	59701429	0.348741	0.673732	0.237521	0	inf	0	16	3.80033	405
3	p22.1	CCDC13	NM_144719	42749873	42814745	0.540776	0.540041	PANCAN	3p	del	cent	p	1	p	0.95	31013358	59701429	0.348741	0.673732	0.237521	0	inf	0	16	3.80033	405
3	p22.1	CCDC13-AS1	NR_046732	42774066	42786650	0.540501	0.540359	PANCAN	3p	del	cent	p	1	p	0.95	31013358	59701429	0.348741	0.673732	0.237521	0	inf	0	16	3.80033	405
3	p22.1	LINC02158	NR_122070	42812103	42815126	0.540071	0.540036	PANCAN	3p	del	cent	p	1	p	0.95	31013358	59701429	0.348741	0.673732	0.237521	0	inf	0	16	3.80033	405
3	p22.1	HIGD1A	NM_014056	42824399	42846027	0.539931	0.539686	PANCAN	3p	del	cent	p	1	p	0.95	31013358	59701429	0.348741	0.673732	0.237521	0	inf	0	16	3.80033	405
3	p22.1	ACKR2	NM_001296	42850963	42908775	0.53963	0.538975	PANCAN	3p	del	cent	p	1	p	0.95	31013358	59701429	0.348741	0.673732	0.237521	0	inf	0	16	3.80033	405
3	p22.1	CYP8B1	NM_004391	42913683	42917633	0.53892	0.538875	PANCAN	3p	del	cent	p	1	p	0.95	31013358	59701429	0.348741	0.673732	0.237521	0	inf	0	16	3.80033	405
3	p22.1	ZNF662	NM_207404	42947401	42960825	0.538538	0.538386	PANCAN	3p	del	cent	p	1	p	0.95	31013358	59701429	0.348741	0.673732	0.237521	0	inf	0	16	3.80033	405
3	p22.1	KRBOX1-AS1	NR_122033	42975735	42978277	0.538217	0.538188	PANCAN	3p	del	cent	p	1	p	0.95	31013358	59701429	0.348741	0.673732	0.237521	0	inf	0	16	3.80033	405
3	p22.1	KRBOX1	NM_001205272	42977833	42984283	0.538193	0.53812	PANCAN	3p	del	cent	p	1	p	0.95	31013358	59701429	0.348741	0.673732	0.237521	0	inf	0	16	3.80033	405
3	p22.1	FAM198A	NM_001129908	43020758	43099207	0.537707	0.536818	PANCAN	3p	del	cent	p	1	p	0.95	31013358	59701429	0.348741	0.673732	0.237521	0	inf	0	16	3.80033	405
3	p22.1	POMGNT2	NM_032806	43120720	43147575	0.536574	0.53627	PANCAN	3p	del	cent	p	1	p	0.95	31013358	59701429	0.348741	0.673732	0.237521	0	inf	0	16	3.80033	405
3	p22.1	SNRK	NM_001330750	43328003	43392634	0.534226	0.533494	PANCAN	3p	del	cent	p	1	p	0.95	31013358	59701429	0.348741	0.673732	0.237521	0	inf	0	16	3.80033	405
3	p22.1	SNRK-AS1	NR_046757	43388410	43393454	0.533542	0.533485	PANCAN	3p	del	cent	p	1	p	0.95	31013358	59701429	0.348741	0.673732	0.237521	0	inf	0	16	3.80033	405
3	p22.1	ANO10	NM_001346469	43407817	43733086	0.533322	0.529637	PANCAN	3p	del	cent	p	1	p	0.95	31013358	59701429	0.348741	0.673732	0.237521	0	inf	0	16	3.80033	405
3	p21.33	ABHD5	NM_001355186	43732361	43775863	0.529645	0.529153	PANCAN	3p	del	cent	p	1	p	0.95	31013358	59701429	0.348741	0.673732	0.237521	0	inf	0	16	3.80033	405
3	p21.32	MIR138-1	NR_029700	44155703	44155802	0.52485	0.524849	PANCAN	3p	del	cent	p	1	p	0.95	31013358	59701429	0.348741	0.673732	0.237521	0	inf	0	16	3.80033	405
3	p21.31	TOPAZ1	NM_001145030	44283377	44373590	0.523403	0.522381	PANCAN	3p	del	cent	p	1	p	0.95	31013358	59701429	0.348741	0.673732	0.237521	0	inf	0	16	3.80033	405
3	p21.31	TCAIM	NM_001282913	44379610	44450940	0.522313	0.521505	PANCAN	3p	del	cent	p	1	p	0.95	31013358	59701429	0.348741	0.673732	0.237521	0	inf	0	16	3.80033	405
3	p21.31	LINC00694	NM_001351480	44462623	44465517	0.521373	0.52134	PANCAN	3p	del	cent	p	1	p	0.95	31013358	59701429	0.348741	0.673732	0.237521	0	inf	0	16	3.80033	405
3	p21.31	LINC01988	NR_144436	44469413	44471021	0.521296	0.521278	PANCAN	3p	del	cent	p	1	p	0.95	31013358	59701429	0.348741	0.673732	0.237521	0	inf	0	16	3.80033	405
3	p21.31	ZNF445	NM_181489	44481261	44519162	0.521162	0.520732	PANCAN	3p	del	cent	p	1	p	0.95	31013358	59701429	0.348741	0.673732	0.237521	0	inf	0	16	3.80033	405
3	p21.31	ZNF852	NM_001287349	44540461	44552132	0.520491	0.520359	PANCAN	3p	del	cent	p	1	p	0.95	31013358	59701429	0.348741	0.673732	0.237521	0	inf	0	16	3.80033	405
3	p21.31	ZKSCAN7	NM_025169	44596666	44624956	0.519854	0.519534	PANCAN	3p	del	cent	p	1	p	0.95	31013358	59701429	0.348741	0.673732	0.237521	0	inf	0	16	3.80033	405
3	p21.31	ZNF660	NM_173658	44626341	44641185	0.519518	0.51935	PANCAN	3p	del	cent	p	1	p	0.95	31013358	59701429	0.348741	0.673732	0.237521	0	inf	0	16	3.80033	405
3	p21.31	ZNF660-ZNF197	NM_001351734	44626341	44689963	0.519518	0.518797	PANCAN	3p	del	cent	p	1	p	0.95	31013358	59701429	0.348741	0.673732	0.237521	0	inf	0	16	3.80033	405
3	p21.31	ZNF197-AS1	NR_046658	44658619	44666289	0.519152	0.519066	PANCAN	3p	del	cent	p	1	p	0.95	31013358	59701429	0.348741	0.673732	0.237521	0	inf	0	16	3.80033	405
3	p21.31	ZNF197	NM_006991	44666510	44689963	0.519063	0.518797	PANCAN	3p	del	cent	p	1	p	0.95	31013358	59701429	0.348741	0.673732	0.237521	0	inf	0	16	3.80033	405
3	p21.31	ZNF35	NM_003420	44690232	44702283	0.518794	0.518658	PANCAN	3p	del	cent	p	1	p	0.95	31013358	59701429	0.348741	0.673732	0.237521	0	inf	0	16	3.80033	405
3	p21.31	ZNF502	NM_033210	44754134	44765323	0.51807	0.517944	PANCAN	3p	del	cent	p	1	p	0.95	31013358	59701429	0.348741	0.673732	0.237521	0	inf	0	16	3.80033	405
3	p21.31	ZNF501	NM_145044	44771097	44778575	0.517878	0.517793	PANCAN	3p	del	cent	p	1	p	0.95	31013358	59701429	0.348741	0.673732	0.237521	0	inf	0	16	3.80033	405
3	p21.31	KIAA1143	NM_020696	44790235	44803173	0.517661	0.517515	PANCAN	3p	del	cent	p	1	p	0.95	31013358	59701429	0.348741	0.673732	0.237521	0	inf	0	16	3.80033	405
3	p21.31	KIF15	NM_020242	44803208	44894748	0.517514	0.516477	PANCAN	3p	del	cent	p	1	p	0.95	31013358	59701429	0.348741	0.673732	0.237521	0	inf	0	16	3.80033	405
3	p21.31	MIR564	NR_030290	44903379	44903473	0.51638	0.516379	PANCAN	3p	del	cent	p	1	p	0.95	31013358	59701429	0.348741	0.673732	0.237521	0	inf	0	16	3.80033	405
3	p21.31	TMEM42	NM_144638	44903400	44907159	0.516379	0.516337	PANCAN	3p	del	cent	p	1	p	0.95	31013358	59701429	0.348741	0.673732	0.237521	0	inf	0	16	3.80033	405
3	p21.31	TGM4	NM_003241	44916097	44956088	0.516236	0.515783	PANCAN	3p	del	cent	p	1	p	0.95	31013358	59701429	0.348741	0.673732	0.237521	0	inf	0	16	3.80033	405
3	p21.31	ZDHHC3	NM_001349380	44956752	45017677	0.515775	0.515085	PANCAN	3p	del	cent	p	1	p	0.95	31013358	59701429	0.348741	0.673732	0.237521	0	inf	0	16	3.80033	405
3	p21.31	EXOSC7	NR_023353	45017740	45054158	0.515084	0.514672	PANCAN	3p	del	cent	p	1	p	0.95	31013358	59701429	0.348741	0.673732	0.237521	0	inf	0	16	3.80033	405
3	p21.31	CLEC3B	NM_003278	45067758	45077563	0.514517	0.514406	PANCAN	3p	del	cent	p	1	p	0.95	31013358	59701429	0.348741	0.673732	0.237521	0	inf	0	16	3.80033	405
3	p21.31	CDCP1	NM_022842	45123765	45187914	0.513883	0.513156	PANCAN	3p	del	cent	p	1	p	0.95	31013358	59701429	0.348741	0.673732	0.237521	0	inf	0	16	3.80033	405
3	p21.31	TMEM158	NM_015444	45265955	45267814	0.512272	0.512251	PANCAN	3p	del	cent	p	1	p	0.95	31013358	59701429	0.348741	0.673732	0.237521	0	inf	0	16	3.80033	405
3	p21.31	LARS2	NM_015340	45430074	45590328	0.510413	0.508598	PANCAN	3p	del	cent	p	1	p	0.95	31013358	59701429	0.348741	0.673732	0.237521	0	inf	0	16	3.80033	405
3	p21.31	LARS2-AS1	NR_048543	45524186	45551037	0.509347	0.509043	PANCAN	3p	del	cent	p	1	p	0.95	31013358	59701429	0.348741	0.673732	0.237521	0	inf	0	16	3.80033	405
3	p21.31	LIMD1	NM_014240	45636322	45722755	0.508077	0.507097	PANCAN	3p	del	cent	p	1	p	0.95	31013358	59701429	0.348741	0.673732	0.237521	0	inf	0	16	3.80033	405
3	p21.31	LIMD1-AS1	NR_033947	45719656	45730374	0.507133	0.507011	PANCAN	3p	del	cent	p	1	p	0.95	31013358	59701429	0.348741	0.673732	0.237521	0	inf	0	16	3.80033	405
3	p21.31	SACM1L	NM_014016	45730732	45786917	0.507007	0.506371	PANCAN	3p	del	cent	p	1	p	0.95	31013358	59701429	0.348741	0.673732	0.237521	0	inf	0	16	3.80033	405
3	p21.31	SLC6A20	NM_022405	45796940	45838035	0.506257	0.505791	PANCAN	3p	del	cent	p	1	p	0.95	31013358	59701429	0.348741	0.673732	0.237521	0	inf	0	16	3.80033	405
3	p21.31	LZTFL1	NM_001276379	45864809	45957216	0.505488	0.504441	PANCAN	3p	del	cent	p	1	p	0.95	31013358	59701429	0.348741	0.673732	0.237521	0	inf	0	16	3.80033	405
3	p21.31	CCR9	NM_031200	45927995	45944667	0.504772	0.504583	PANCAN	3p	del	cent	p	1	p	0.95	31013358	59701429	0.348741	0.673732	0.237521	0	inf	0	16	3.80033	405
3	p21.31	FYCO1	NM_024513	45959390	46037316	0.504417	0.503534	PANCAN	3p	del	cent	p	1	p	0.95	31013358	59701429	0.348741	0.673732	0.237521	0	inf	0	16	3.80033	405
3	p21.31	CXCR6	NM_006564	45984972	45989845	0.504127	0.504072	PANCAN	3p	del	cent	p	1	p	0.95	31013358	59701429	0.348741	0.673732	0.237521	0	inf	0	16	3.80033	405
3	p21.31	XCR1	NM_005283	46062290	46068979	0.503251	0.503175	PANCAN	3p	del	cent	p	1	p	0.95	31013358	59701429	0.348741	0.673732	0.237521	0	inf	0	16	3.80033	405
3	p21.31	CCR1	NM_001295	46243199	46249832	0.501202	0.501126	PANCAN	3p	del	cent	p	1	p	0.95	31013358	59701429	0.348741	0.673732	0.237521	0	inf	0	16	3.80033	405
3	p21.31	CCR3	NM_178329	46283871	46308197	0.500741	0.500465	PANCAN	3p	del	cent	p	1	p	0.95	31013358	59701429	0.348741	0.673732	0.237521	0	inf	0	16	3.80033	405
3	p21.31	CCR2	NM_001123041	46395234	46402413	0.499479	0.499398	PANCAN	3p	del	cent	p	1	p	0.95	31013358	59701429	0.348741	0.673732	0.237521	0	inf	0	16	3.80033	405
3	p21.31	LOC102724297	NR_125406	46406150	46448550	0.499356	0.498875	PANCAN	3p	del	cent	p	1	p	0.95	31013358	59701429	0.348741	0.673732	0.237521	0	inf	0	16	3.80033	405
3	p21.31	CCR5	NM_001100168	46411632	46417697	0.499293	0.499225	PANCAN	3p	del	cent	p	1	p	0.95	31013358	59701429	0.348741	0.673732	0.237521	0	inf	0	16	3.80033	405
3	p21.31	CCRL2	NM_003965	46448720	46451014	0.498873	0.498847	PANCAN	3p	del	cent	p	1	p	0.95	31013358	59701429	0.348741	0.673732	0.237521	0	inf	0	16	3.80033	405
3	p21.31	LINC02009	NR_151704	46458006	46465158	0.498768	0.498687	PANCAN	3p	del	cent	p	1	p	0.95	31013358	59701429	0.348741	0.673732	0.237521	0	inf	0	16	3.80033	405
3	p21.31	LTF	NM_001321122	46477495	46526724	0.498547	0.49799	PANCAN	3p	del	cent	p	1	p	0.95	31013358	59701429	0.348741	0.673732	0.237521	0	inf	0	16	3.80033	405
3	p21.31	RTP3	NM_031440	46539484	46542439	0.497845	0.497812	PANCAN	3p	del	cent	p	1	p	0.95	31013358	59701429	0.348741	0.673732	0.237521	0	inf	0	16	3.80033	405
3	p21.31	LRRC2	NM_024512	46556877	46608040	0.497648	0.497068	PANCAN	3p	del	cent	p	1	p	0.95	31013358	59701429	0.348741	0.673732	0.237521	0	inf	0	16	3.80033	405
3	p21.31	LRRC2-AS1	NR_073385	46598887	46601178	0.497172	0.497146	PANCAN	3p	del	cent	p	1	p	0.95	31013358	59701429	0.348741	0.673732	0.237521	0	inf	0	16	3.80033	405
3	p21.31	TDGF1	NM_001174136	46616044	46623952	0.496978	0.496888	PANCAN	3p	del	cent	p	1	p	0.95	31013358	59701429	0.348741	0.673732	0.237521	0	inf	0	16	3.80033	405
3	p21.31	FAM240A	NM_001195442	46653924	46668033	0.496549	0.496389	PANCAN	3p	del	cent	p	1	p	0.95	31013358	59701429	0.348741	0.673732	0.237521	0	inf	0	16	3.80033	405
3	p21.31	ALS2CL	NM_147129	46710484	46735203	0.495908	0.495628	PANCAN	3p	del	cent	p	1	p	0.95	31013358	59701429	0.348741	0.673732	0.237521	0	inf	0	16	3.80033	405
3	p21.31	TMIE	NM_147196	46742822	46752413	0.495542	0.495433	PANCAN	3p	del	cent	p	1	p	0.95	31013358	59701429	0.348741	0.673732	0.237521	0	inf	0	16	3.80033	405
3	p21.31	PRSS50	NM_013270	46753605	46759373	0.495419	0.495354	PANCAN	3p	del	cent	p	1	p	0.95	31013358	59701429	0.348741	0.673732	0.237521	0	inf	0	16	3.80033	405
3	p21.31	PRSS46P	NR_147121	46761072	46777917	0.495335	0.495144	PANCAN	3p	del	cent	p	1	p	0.95	31013358	59701429	0.348741	0.673732	0.237521	0	inf	0	16	3.80033	405
3	p21.31	PRSS45	NM_199183	46783580	46786245	0.49508	0.49505	PANCAN	3p	del	cent	p	1	p	0.95	31013358	59701429	0.348741	0.673732	0.237521	0	inf	0	16	3.80033	405
3	p21.31	PRSS42	NM_182702	46871032	46875585	0.494089	0.494038	PANCAN	3p	del	cent	p	1	p	0.95	31013358	59701429	0.348741	0.673732	0.237521	0	inf	0	16	3.80033	405
3	p21.31	MYL3	NM_000258	46899356	46904973	0.493768	0.493705	PANCAN	3p	del	cent	p	1	p	0.95	31013358	59701429	0.348741	0.673732	0.237521	0	inf	0	16	3.80033	405
3	p21.31	PTH1R	NM_000316	46919235	46945289	0.493543	0.493248	PANCAN	3p	del	cent	p	1	p	0.95	31013358	59701429	0.348741	0.673732	0.237521	0	inf	0	16	3.80033	405
3	p21.31	CCDC12	NM_144716	46963219	47023500	0.493045	0.492362	PANCAN	3p	del	cent	p	1	p	0.95	31013358	59701429	0.348741	0.673732	0.237521	0	inf	0	16	3.80033	405
3	p21.31	NBEAL2	NM_015175	47021172	47051194	0.492388	0.492048	PANCAN	3p	del	cent	p	1	p	0.95	31013358	59701429	0.348741	0.673732	0.237521	0	inf	0	16	3.80033	405
3	p21.31	NRADDP	NR_024046	47053031	47054957	0.492027	0.492006	PANCAN	3p	del	cent	p	1	p	0.95	31013358	59701429	0.348741	0.673732	0.237521	0	inf	0	16	3.80033	405
3	p21.31	SETD2	NR_146158	47057897	47205467	0.491972	0.490301	PANCAN	3p	del	cent	p	1	p	0.95	31013358	59701429	0.348741	0.673732	0.237521	0	inf	0	16	3.80033	405
3	p21.31	KIF9-AS1	NR_033373	47205859	47285606	0.490296	0.489393	PANCAN	3p	del	cent	p	1	p	0.95	31013358	59701429	0.348741	0.673732	0.237521	0	inf	0	16	3.80033	405
3	p21.31	KIF9	NM_022342	47269515	47324337	0.489575	0.488954	PANCAN	3p	del	cent	p	1	p	0.95	31013358	59701429	0.348741	0.673732	0.237521	0	inf	0	16	3.80033	405
3	p21.31	SNORD13J	NR_145712	47292008	47292099	0.48932	0.489319	PANCAN	3p	del	cent	p	1	p	0.95	31013358	59701429	0.348741	0.673732	0.237521	0	inf	0	16	3.80033	405
3	p21.31	KLHL18	NM_025010	47324329	47388306	0.488954	0.488229	PANCAN	3p	del	cent	p	1	p	0.95	31013358	59701429	0.348741	0.673732	0.237521	0	inf	0	16	3.80033	405
3	p21.31	PTPN23	NM_001304482	47422471	47454931	0.487842	0.487475	PANCAN	3p	del	cent	p	1	p	0.95	31013358	59701429	0.348741	0.673732	0.237521	0	inf	0	16	3.80033	405
3	p21.31	SCAP	NM_001320044	47455174	47517449	0.487472	0.486766	PANCAN	3p	del	cent	p	1	p	0.95	31013358	59701429	0.348741	0.673732	0.237521	0	inf	0	16	3.80033	405
3	p21.31	ELP6	NM_001031703	47537129	47555199	0.486543	0.486339	PANCAN	3p	del	cent	p	1	p	0.95	31013358	59701429	0.348741	0.673732	0.237521	0	inf	0	16	3.80033	405
3	p21.31	CSPG5	NM_001206945	47603727	47621730	0.485789	0.485585	PANCAN	3p	del	cent	p	1	p	0.95	31013358	59701429	0.348741	0.673732	0.237521	0	inf	0	16	3.80033	405
3	p21.31	SMARCC1	NM_003074	47627377	47823405	0.485521	0.4833	PANCAN	3p	del	cent	p	1	p	0.95	31013358	59701429	0.348741	0.673732	0.237521	0	inf	0	16	3.80033	405
3	p21.31	SNORD146	NR_145791	47703054	47703184	0.484664	0.484662	PANCAN	3p	del	cent	p	1	p	0.95	31013358	59701429	0.348741	0.673732	0.237521	0	inf	0	16	3.80033	405
3	p21.31	DHX30	NM_001330990	47844398	47891686	0.483062	0.482527	PANCAN	3p	del	cent	p	1	p	0.95	31013358	59701429	0.348741	0.673732	0.237521	0	inf	0	16	3.80033	405
3	p21.31	MIR1226	NR_031595	47891044	47891119	0.482534	0.482533	PANCAN	3p	del	cent	p	1	p	0.95	31013358	59701429	0.348741	0.673732	0.237521	0	inf	0	16	3.80033	405
3	p21.31	MAP4	NM_002375	47892179	48130769	0.482521	0.479818	PANCAN	3p	del	cent	p	1	p	0.95	31013358	59701429	0.348741	0.673732	0.237521	0	inf	0	16	3.80033	405
3	p21.31	CDC25A	NM_201567	48198667	48229801	0.479049	0.478696	PANCAN	3p	del	cent	p	1	p	0.95	31013358	59701429	0.348741	0.673732	0.237521	0	inf	0	16	3.80033	405
3	p21.31	MIR4443	NR_039645	48238053	48238106	0.478603	0.478602	PANCAN	3p	del	cent	p	1	p	0.95	31013358	59701429	0.348741	0.673732	0.237521	0	inf	0	16	3.80033	405
3	p21.31	CAMP	NM_004345	48264836	48266981	0.4783	0.478275	PANCAN	3p	del	cent	p	1	p	0.95	31013358	59701429	0.348741	0.673732	0.237521	0	inf	0	16	3.80033	405
3	p21.31	ZNF589	NM_016089	48282595	48312479	0.478098	0.47776	PANCAN	3p	del	cent	p	1	p	0.95	31013358	59701429	0.348741	0.673732	0.237521	0	inf	0	16	3.80033	405
3	p21.31	FCF1P2	NR_134638	48331768	48333168	0.477541	0.477525	PANCAN	3p	del	cent	p	1	p	0.95	31013358	59701429	0.348741	0.673732	0.237521	0	inf	0	16	3.80033	405
3	p21.31	NME6	NM_001308435	48333806	48343175	0.477518	0.477412	PANCAN	3p	del	cent	p	1	p	0.95	31013358	59701429	0.348741	0.673732	0.237521	0	inf	0	16	3.80033	405
3	p21.31	SPINK8	NM_001080525	48348335	48369831	0.477354	0.47711	PANCAN	3p	del	cent	p	1	p	0.95	31013358	59701429	0.348741	0.673732	0.237521	0	inf	0	16	3.80033	405
3	p21.31	MIR2115	NR_031749	48357849	48357949	0.477246	0.477245	PANCAN	3p	del	cent	p	1	p	0.95	31013358	59701429	0.348741	0.673732	0.237521	0	inf	0	16	3.80033	405
3	p21.31	FBXW12	NM_001159929	48413708	48436190	0.476613	0.476358	PANCAN	3p	del	cent	p	1	p	0.95	31013358	59701429	0.348741	0.673732	0.237521	0	inf	0	16	3.80033	405
3	p21.31	PLXNB1	NM_001130082	48445260	48471460	0.476256	0.475959	PANCAN	3p	del	cent	p	1	p	0.95	31013358	59701429	0.348741	0.673732	0.237521	0	inf	0	16	3.80033	405
3	p21.31	CCDC51	NM_024661	48473579	48481529	0.475935	0.475845	PANCAN	3p	del	cent	p	1	p	0.95	31013358	59701429	0.348741	0.673732	0.237521	0	inf	0	16	3.80033	405
3	p21.31	TMA7	NM_015933	48481647	48485616	0.475843	0.475798	PANCAN	3p	del	cent	p	1	p	0.95	31013358	59701429	0.348741	0.673732	0.237521	0	inf	0	16	3.80033	405
3	p21.31	ATRIP	NM_001271022	48488113	48507054	0.47577	0.475556	PANCAN	3p	del	cent	p	1	p	0.95	31013358	59701429	0.348741	0.673732	0.237521	0	inf	0	16	3.80033	405
3	p21.31	TREX1	NM_007248	48506918	48509044	0.475557	0.475533	PANCAN	3p	del	cent	p	1	p	0.95	31013358	59701429	0.348741	0.673732	0.237521	0	inf	0	16	3.80033	405
3	p21.31	SHISA5	NM_001272066	48509196	48542259	0.475531	0.475157	PANCAN	3p	del	cent	p	1	p	0.95	31013358	59701429	0.348741	0.673732	0.237521	0	inf	0	16	3.80033	405
3	p21.31	PFKFB4	NM_001317136	48555116	48598613	0.475011	0.474518	PANCAN	3p	del	cent	p	1	p	0.95	31013358	59701429	0.348741	0.673732	0.237521	0	inf	0	16	3.80033	405
3	p21.31	MIR6823	NR_106881	48587393	48587454	0.474646	0.474645	PANCAN	3p	del	cent	p	1	p	0.95	31013358	59701429	0.348741	0.673732	0.237521	0	inf	0	16	3.80033	405
3	p21.31	UCN2	NM_033199	48599150	48601201	0.474512	0.474489	PANCAN	3p	del	cent	p	1	p	0.95	31013358	59701429	0.348741	0.673732	0.237521	0	inf	0	16	3.80033	405
3	p21.31	COL7A1	NM_000094	48601505	48632593	0.474486	0.474133	PANCAN	3p	del	cent	p	1	p	0.95	31013358	59701429	0.348741	0.673732	0.237521	0	inf	0	16	3.80033	405
3	p21.31	MIR711	NR_031756	48616334	48616410	0.474318	0.474317	PANCAN	3p	del	cent	p	1	p	0.95	31013358	59701429	0.348741	0.673732	0.237521	0	inf	0	16	3.80033	405
3	p21.31	UQCRC1	NM_003365	48636431	48647098	0.47409	0.473969	PANCAN	3p	del	cent	p	1	p	0.95	31013358	59701429	0.348741	0.673732	0.237521	0	inf	0	16	3.80033	405
3	p21.31	SNORA94	NR_132776	48642352	48642583	0.474023	0.47402	PANCAN	3p	del	cent	p	1	p	0.95	31013358	59701429	0.348741	0.673732	0.237521	0	inf	0	16	3.80033	405
3	p21.31	TMEM89	NM_001008269	48658191	48659288	0.473843	0.473831	PANCAN	3p	del	cent	p	1	p	0.95	31013358	59701429	0.348741	0.673732	0.237521	0	inf	0	16	3.80033	405
3	p21.31	SLC26A6	NM_001281733	48663155	48672926	0.473787	0.473677	PANCAN	3p	del	cent	p	1	p	0.95	31013358	59701429	0.348741	0.673732	0.237521	0	inf	0	16	3.80033	405
3	p21.31	MIR6824	NR_106882	48671068	48671131	0.473698	0.473697	PANCAN	3p	del	cent	p	1	p	0.95	31013358	59701429	0.348741	0.673732	0.237521	0	inf	0	16	3.80033	405
3	p21.31	CELSR3	NM_001407	48673895	48700348	0.473666	0.473366	PANCAN	3p	del	cent	p	1	p	0.95	31013358	59701429	0.348741	0.673732	0.237521	0	inf	0	16	3.80033	405
3	p21.31	MIR4793	NR_039956	48681626	48681713	0.473578	0.473577	PANCAN	3p	del	cent	p	1	p	0.95	31013358	59701429	0.348741	0.673732	0.237521	0	inf	0	16	3.80033	405
3	p21.31	CELSR3-AS1	NR_111921	48701200	48706603	0.473356	0.473295	PANCAN	3p	del	cent	p	1	p	0.95	31013358	59701429	0.348741	0.673732	0.237521	0	inf	0	16	3.80033	405
3	p21.31	NCKIPSD	NM_016453	48711271	48723366	0.473242	0.473105	PANCAN	3p	del	cent	p	1	p	0.95	31013358	59701429	0.348741	0.673732	0.237521	0	inf	0	16	3.80033	405
3	p21.31	IP6K2	NM_016291	48725435	48754711	0.473082	0.47275	PANCAN	3p	del	cent	p	1	p	0.95	31013358	59701429	0.348741	0.673732	0.237521	0	inf	0	16	3.80033	405
3	p21.31	PRKAR2A	NM_004157	48784011	48885283	0.472418	0.471271	PANCAN	3p	del	cent	p	1	p	0.95	31013358	59701429	0.348741	0.673732	0.237521	0	inf	0	16	3.80033	405
3	p21.31	PRKAR2A-AS1	NR_109996	48885369	48889415	0.47127	0.471224	PANCAN	3p	del	cent	p	1	p	0.95	31013358	59701429	0.348741	0.673732	0.237521	0	inf	0	16	3.80033	405
3	p21.31	SLC25A20	NM_000387	48894355	48936426	0.471168	0.470692	PANCAN	3p	del	cent	p	1	p	0.95	31013358	59701429	0.348741	0.673732	0.237521	0	inf	0	16	3.80033	405
3	p21.31	ARIH2OS	NM_001123040	48955220	48956818	0.470479	0.47046	PANCAN	3p	del	cent	p	1	p	0.95	31013358	59701429	0.348741	0.673732	0.237521	0	inf	0	16	3.80033	405
3	p21.31	ARIH2	NM_001349224	48956252	49022971	0.470467	0.469711	PANCAN	3p	del	cent	p	1	p	0.95	31013358	59701429	0.348741	0.673732	0.237521	0	inf	0	16	3.80033	405
3	p21.31	P4HTM	NM_177939	49027340	49044581	0.469662	0.469466	PANCAN	3p	del	cent	p	1	p	0.95	31013358	59701429	0.348741	0.673732	0.237521	0	inf	0	16	3.80033	405
3	p21.31	WDR6	NM_001320546	49044494	49053386	0.469467	0.469367	PANCAN	3p	del	cent	p	1	p	0.95	31013358	59701429	0.348741	0.673732	0.237521	0	inf	0	16	3.80033	405
3	p21.31	DALRD3	NM_018114	49052920	49058504	0.469372	0.469309	PANCAN	3p	del	cent	p	1	p	0.95	31013358	59701429	0.348741	0.673732	0.237521	0	inf	0	16	3.80033	405
3	p21.31	MIR425	NR_029948	49057580	49057667	0.469319	0.469318	PANCAN	3p	del	cent	p	1	p	0.95	31013358	59701429	0.348741	0.673732	0.237521	0	inf	0	16	3.80033	405
3	p21.31	NDUFAF3	NM_199074	49057907	49060926	0.469315	0.469281	PANCAN	3p	del	cent	p	1	p	0.95	31013358	59701429	0.348741	0.673732	0.237521	0	inf	0	16	3.80033	405
3	p21.31	MIR191	NR_029690	49058050	49058142	0.469314	0.469313	PANCAN	3p	del	cent	p	1	p	0.95	31013358	59701429	0.348741	0.673732	0.237521	0	inf	0	16	3.80033	405
3	p21.31	IMPDH2	NM_000884	49061761	49066875	0.469272	0.469214	PANCAN	3p	del	cent	p	1	p	0.95	31013358	59701429	0.348741	0.673732	0.237521	0	inf	0	16	3.80033	405
3	p21.31	QRICH1	NM_198880	49067139	49131806	0.469211	0.468478	PANCAN	3p	del	cent	p	1	p	0.95	31013358	59701429	0.348741	0.673732	0.237521	0	inf	0	16	3.80033	405
3	p21.31	QARS	NM_001272073	49133364	49142562	0.468461	0.468356	PANCAN	3p	del	cent	p	1	p	0.95	31013358	59701429	0.348741	0.673732	0.237521	0	inf	0	16	3.80033	405
3	p21.31	MIR6890	NR_106950	49137286	49137347	0.468416	0.468415	PANCAN	3p	del	cent	p	1	p	0.95	31013358	59701429	0.348741	0.673732	0.237521	0	inf	0	16	3.80033	405
3	p21.31	USP19	NM_001351101	49145478	49158371	0.468323	0.468177	PANCAN	3p	del	cent	p	1	p	0.95	31013358	59701429	0.348741	0.673732	0.237521	0	inf	0	16	3.80033	405
3	p21.31	LAMB2	NM_002292	49158546	49170599	0.468175	0.468039	PANCAN	3p	del	cent	p	1	p	0.95	31013358	59701429	0.348741	0.673732	0.237521	0	inf	0	16	3.80033	405
3	p21.31	LAMB2P1	NR_004405	49190291	49191834	0.467816	0.467798	PANCAN	3p	del	cent	p	1	p	0.95	31013358	59701429	0.348741	0.673732	0.237521	0	inf	0	16	3.80033	405
3	p21.31	CCDC71	NM_022903	49199967	49203785	0.467706	0.467663	PANCAN	3p	del	cent	p	1	p	0.95	31013358	59701429	0.348741	0.673732	0.237521	0	inf	0	16	3.80033	405
3	p21.31	KLHDC8B	NM_173546	49209017	49213919	0.467603	0.467548	PANCAN	3p	del	cent	p	1	p	0.95	31013358	59701429	0.348741	0.673732	0.237521	0	inf	0	16	3.80033	405
3	p21.31	C3orf84	NM_001080528	49215068	49229291	0.467535	0.467374	PANCAN	3p	del	cent	p	1	p	0.95	31013358	59701429	0.348741	0.673732	0.237521	0	inf	0	16	3.80033	405
3	p21.31	CCDC36	NM_178173	49235860	49295537	0.467299	0.466623	PANCAN	3p	del	cent	p	1	p	0.95	31013358	59701429	0.348741	0.673732	0.237521	0	inf	0	16	3.80033	405
3	p21.31	C3orf62	NM_198562	49306029	49314508	0.466504	0.466408	PANCAN	3p	del	cent	p	1	p	0.95	31013358	59701429	0.348741	0.673732	0.237521	0	inf	0	16	3.80033	405
3	p21.31	MIR4271	NR_036233	49311552	49311619	0.466442	0.466441	PANCAN	3p	del	cent	p	1	p	0.95	31013358	59701429	0.348741	0.673732	0.237521	0	inf	0	16	3.80033	405
3	p21.31	USP4	NM_003363	49314576	49377536	0.466408	0.465694	PANCAN	3p	del	cent	p	1	p	0.95	31013358	59701429	0.348741	0.673732	0.237521	0	inf	0	16	3.80033	405
3	p21.31	GPX1	NM_001329455	49394603	49396033	0.465501	0.465485	PANCAN	3p	del	cent	p	1	p	0.95	31013358	59701429	0.348741	0.673732	0.237521	0	inf	0	16	3.80033	405
3	p21.31	RHOA	NM_001313943	49396568	49449530	0.465479	0.464879	PANCAN	3p	del	cent	p	1	p	0.95	31013358	59701429	0.348741	0.673732	0.237521	0	inf	0	16	3.80033	405
3	p21.31	TCTA	NM_022171	49449638	49453909	0.464878	0.464829	PANCAN	3p	del	cent	p	1	p	0.95	31013358	59701429	0.348741	0.673732	0.237521	0	inf	0	16	3.80033	405
3	p21.31	AMT	NR_028435	49454210	49460111	0.464826	0.464759	PANCAN	3p	del	cent	p	1	p	0.95	31013358	59701429	0.348741	0.673732	0.237521	0	inf	0	16	3.80033	405
3	p21.31	NICN1	NM_032316	49459765	49466757	0.464763	0.464684	PANCAN	3p	del	cent	p	1	p	0.95	31013358	59701429	0.348741	0.673732	0.237521	0	inf	0	16	3.80033	405
3	p21.31	DAG1	NM_001177643	49506135	49573051	0.464238	0.46348	PANCAN	3p	del	cent	p	1	p	0.95	31013358	59701429	0.348741	0.673732	0.237521	0	inf	0	16	3.80033	405
3	p21.31	BSN-AS2	NR_038866	49586738	49591799	0.463324	0.463267	PANCAN	3p	del	cent	p	1	p	0.95	31013358	59701429	0.348741	0.673732	0.237521	0	inf	0	16	3.80033	405
3	p21.31	BSN	NM_003458	49591921	49708982	0.463266	0.46194	PANCAN	3p	del	cent	p	1	p	0.95	31013358	59701429	0.348741	0.673732	0.237521	0	inf	0	16	3.80033	405
3	p21.31	APEH	NM_001640	49711434	49720934	0.461912	0.461804	PANCAN	3p	del	cent	p	1	p	0.95	31013358	59701429	0.348741	0.673732	0.237521	0	inf	0	16	3.80033	405
3	p21.31	MST1	NM_020998	49721379	49726196	0.461799	0.461745	PANCAN	3p	del	cent	p	1	p	0.95	31013358	59701429	0.348741	0.673732	0.237521	0	inf	0	16	3.80033	405
3	p21.31	RNF123	NM_022064	49726931	49758962	0.461736	0.461373	PANCAN	3p	del	cent	p	1	p	0.95	31013358	59701429	0.348741	0.673732	0.237521	0	inf	0	16	3.80033	405
3	p21.31	AMIGO3	NM_198722	49754266	49757238	0.461427	0.461393	PANCAN	3p	del	cent	p	1	p	0.95	31013358	59701429	0.348741	0.673732	0.237521	0	inf	0	16	3.80033	405
3	p21.31	GMPPB	NM_013334	49758908	49761407	0.461374	0.461346	PANCAN	3p	del	cent	p	1	p	0.95	31013358	59701429	0.348741	0.673732	0.237521	0	inf	0	16	3.80033	405
3	p21.31	IP6K1	NM_153273	49761727	49823973	0.461342	0.460637	PANCAN	3p	del	cent	p	1	p	0.95	31013358	59701429	0.348741	0.673732	0.237521	0	inf	0	16	3.80033	405
3	p21.31	CDHR4	NM_001007540	49828166	49837268	0.460589	0.460486	PANCAN	3p	del	cent	p	1	p	0.95	31013358	59701429	0.348741	0.673732	0.237521	0	inf	0	16	3.80033	405
3	p21.31	FAM212A	NM_203370	49840686	49842463	0.460448	0.460428	PANCAN	3p	del	cent	p	1	p	0.95	31013358	59701429	0.348741	0.673732	0.237521	0	inf	0	16	3.80033	405
3	p21.31	UBA7	NM_003335	49842637	49851391	0.460426	0.460326	PANCAN	3p	del	cent	p	1	p	0.95	31013358	59701429	0.348741	0.673732	0.237521	0	inf	0	16	3.80033	405
3	p21.31	MIR5193	NR_049825	49843569	49843678	0.460415	0.460414	PANCAN	3p	del	cent	p	1	p	0.95	31013358	59701429	0.348741	0.673732	0.237521	0	inf	0	16	3.80033	405
3	p21.31	TRAIP	NM_005879	49866027	49893992	0.460161	0.459844	PANCAN	3p	del	cent	p	1	p	0.95	31013358	59701429	0.348741	0.673732	0.237521	0	inf	0	16	3.80033	405
3	p21.31	CAMKV	NM_001320147	49895413	49907655	0.459828	0.459689	PANCAN	3p	del	cent	p	1	p	0.95	31013358	59701429	0.348741	0.673732	0.237521	0	inf	0	16	3.80033	405
3	p21.31	MST1R	NM_001244937	49924435	49941070	0.459499	0.45931	PANCAN	3p	del	cent	p	1	p	0.95	31013358	59701429	0.348741	0.673732	0.237521	0	inf	0	16	3.80033	405
3	p21.31	MON1A	NM_001142501	49946301	49967445	0.459251	0.459012	PANCAN	3p	del	cent	p	1	p	0.95	31013358	59701429	0.348741	0.673732	0.237521	0	inf	0	16	3.80033	405
3	p21.31	RBM6	NM_001349193	49977476	50114685	0.458898	0.457344	PANCAN	3p	del	cent	p	1	p	0.95	31013358	59701429	0.348741	0.673732	0.237521	0	inf	0	16	3.80033	405
3	p21.31	RBM5	NR_036627	50126340	50156397	0.457212	0.456871	PANCAN	3p	del	cent	p	1	p	0.95	31013358	59701429	0.348741	0.673732	0.237521	0	inf	0	16	3.80033	405
3	p21.31	RBM5-AS1	NR_045388	50137035	50138421	0.45709	0.457075	PANCAN	3p	del	cent	p	1	p	0.95	31013358	59701429	0.348741	0.673732	0.237521	0	inf	0	16	3.80033	405
3	p21.31	SEMA3F-AS1	NR_135301	50153454	50193518	0.456904	0.456451	PANCAN	3p	del	cent	p	1	p	0.95	31013358	59701429	0.348741	0.673732	0.237521	0	inf	0	16	3.80033	405
3	p21.31	SEMA3F	NM_001318798	50192477	50226508	0.456462	0.456077	PANCAN	3p	del	cent	p	1	p	0.95	31013358	59701429	0.348741	0.673732	0.237521	0	inf	0	16	3.80033	405
3	p21.31	MIR566	NR_030291	50210758	50210852	0.456255	0.456254	PANCAN	3p	del	cent	p	1	p	0.95	31013358	59701429	0.348741	0.673732	0.237521	0	inf	0	16	3.80033	405
3	p21.31	GNAT1	NM_144499	50229042	50235129	0.456048	0.455979	PANCAN	3p	del	cent	p	1	p	0.95	31013358	59701429	0.348741	0.673732	0.237521	0	inf	0	16	3.80033	405
3	p21.31	SLC38A3	NM_006841	50242678	50258411	0.455894	0.455715	PANCAN	3p	del	cent	p	1	p	0.95	31013358	59701429	0.348741	0.673732	0.237521	0	inf	0	16	3.80033	405
3	p21.31	GNAI2	NM_001282619	50264119	50296786	0.455651	0.455281	PANCAN	3p	del	cent	p	1	p	0.95	31013358	59701429	0.348741	0.673732	0.237521	0	inf	0	16	3.80033	405
3	p21.31	MIR5787	NR_106714	50264867	50264922	0.455642	0.455642	PANCAN	3p	del	cent	p	1	p	0.95	31013358	59701429	0.348741	0.673732	0.237521	0	inf	0	16	3.80033	405
3	p21.31	SEMA3B-AS1	NR_110702	50304072	50304803	0.455198	0.45519	PANCAN	3p	del	cent	p	1	p	0.95	31013358	59701429	0.348741	0.673732	0.237521	0	inf	0	16	3.80033	405
3	p21.31	SEMA3B	NM_004636	50304989	50314602	0.455188	0.455079	PANCAN	3p	del	cent	p	1	p	0.95	31013358	59701429	0.348741	0.673732	0.237521	0	inf	0	16	3.80033	405
3	p21.31	MIR6872	NR_106932	50310666	50310728	0.455124	0.455123	PANCAN	3p	del	cent	p	1	p	0.95	31013358	59701429	0.348741	0.673732	0.237521	0	inf	0	16	3.80033	405
3	p21.31	LSMEM2	NM_153215	50316457	50325545	0.455058	0.454955	PANCAN	3p	del	cent	p	1	p	0.95	31013358	59701429	0.348741	0.673732	0.237521	0	inf	0	16	3.80033	405
3	p21.31	IFRD2	NM_006764	50325162	50330026	0.454959	0.454904	PANCAN	3p	del	cent	p	1	p	0.95	31013358	59701429	0.348741	0.673732	0.237521	0	inf	0	16	3.80033	405
3	p21.31	HYAL3	NM_003549	50330258	50336899	0.454902	0.454826	PANCAN	3p	del	cent	p	1	p	0.95	31013358	59701429	0.348741	0.673732	0.237521	0	inf	0	16	3.80033	405
3	p21.31	NAT6	NM_012191	50333832	50336852	0.454861	0.454827	PANCAN	3p	del	cent	p	1	p	0.95	31013358	59701429	0.348741	0.673732	0.237521	0	inf	0	16	3.80033	405
3	p21.31	HYAL1	NM_153281	50337319	50349812	0.454822	0.45468	PANCAN	3p	del	cent	p	1	p	0.95	31013358	59701429	0.348741	0.673732	0.237521	0	inf	0	16	3.80033	405
3	p21.31	HYAL2	NM_003773	50355220	50360281	0.454619	0.454561	PANCAN	3p	del	cent	p	1	p	0.95	31013358	59701429	0.348741	0.673732	0.237521	0	inf	0	16	3.80033	405
3	p21.31	TUSC2	NM_007275	50362339	50365669	0.454538	0.4545	PANCAN	3p	del	cent	p	1	p	0.95	31013358	59701429	0.348741	0.673732	0.237521	0	inf	0	16	3.80033	405
3	p21.31	RASSF1	NM_007182	50367216	50378367	0.454483	0.454357	PANCAN	3p	del	cent	p	1	p	0.95	31013358	59701429	0.348741	0.673732	0.237521	0	inf	0	16	3.80033	405
3	p21.31	RASSF1-AS1	NR_109831	50374941	50375727	0.454395	0.454386	PANCAN	3p	del	cent	p	1	p	0.95	31013358	59701429	0.348741	0.673732	0.237521	0	inf	0	16	3.80033	405
3	p21.31	ZMYND10	NM_015896	50378536	50383177	0.454355	0.454302	PANCAN	3p	del	cent	p	1	p	0.95	31013358	59701429	0.348741	0.673732	0.237521	0	inf	0	16	3.80033	405
3	p21.31	NPRL2	NM_006545	50384918	50388486	0.454282	0.454242	PANCAN	3p	del	cent	p	1	p	0.95	31013358	59701429	0.348741	0.673732	0.237521	0	inf	0	16	3.80033	405
3	p21.31	CYB561D2	NR_111912	50388125	50405628	0.454246	0.454048	PANCAN	3p	del	cent	p	1	p	0.95	31013358	59701429	0.348741	0.673732	0.237521	0	inf	0	16	3.80033	405
3	p21.31	TMEM115	NM_007024	50392179	50396939	0.4542	0.454146	PANCAN	3p	del	cent	p	1	p	0.95	31013358	59701429	0.348741	0.673732	0.237521	0	inf	0	16	3.80033	405
3	p21.31	CACNA2D2	NM_001291101	50400043	50541675	0.454111	0.452507	PANCAN	3p	del	cent	p	1	p	0.95	31013358	59701429	0.348741	0.673732	0.237521	0	inf	0	16	3.80033	405
3	p21.2	C3orf18	NM_001171741	50595455	50608458	0.451897	0.45175	PANCAN	3p	del	cent	p	1	p	0.95	31013358	59701429	0.348741	0.673732	0.237521	0	inf	0	16	3.80033	405
3	p21.2	HEMK1	NM_001317851	50606582	50622421	0.451771	0.451592	PANCAN	3p	del	cent	p	1	p	0.95	31013358	59701429	0.348741	0.673732	0.237521	0	inf	0	16	3.80033	405
3	p21.2	CISH	NM_145071	50643884	50649262	0.451349	0.451288	PANCAN	3p	del	cent	p	1	p	0.95	31013358	59701429	0.348741	0.673732	0.237521	0	inf	0	16	3.80033	405
3	p21.2	MAPKAPK3	NM_001243926	50649292	50686728	0.451287	0.450863	PANCAN	3p	del	cent	p	1	p	0.95	31013358	59701429	0.348741	0.673732	0.237521	0	inf	0	16	3.80033	405
3	p21.2	MIR4787	NR_039950	50712510	50712594	0.450571	0.45057	PANCAN	3p	del	cent	p	1	p	0.95	31013358	59701429	0.348741	0.673732	0.237521	0	inf	0	16	3.80033	405
3	p21.2	DOCK3	NM_004947	50712671	51421629	0.450569	0.442538	PANCAN	3p	del	cent	p	1	p	0.95	31013358	59701429	0.348741	0.673732	0.237521	0	inf	0	16	3.80033	405
3	p21.2	MANF	NM_006010	51422667	51426828	0.442526	0.442479	PANCAN	3p	del	cent	p	1	p	0.95	31013358	59701429	0.348741	0.673732	0.237521	0	inf	0	16	3.80033	405
3	p21.2	RBM15B	NM_013286	51428698	51435336	0.442458	0.442383	PANCAN	3p	del	cent	p	1	p	0.95	31013358	59701429	0.348741	0.673732	0.237521	0	inf	0	16	3.80033	405
3	p21.2	DCAF1	NM_001171904	51433297	51534018	0.442406	0.441265	PANCAN	3p	del	cent	p	1	p	0.95	31013358	59701429	0.348741	0.673732	0.237521	0	inf	0	16	3.80033	405
3	p21.2	RAD54L2	NM_001322256	51572698	51702676	0.440827	0.439354	PANCAN	3p	del	cent	p	1	p	0.95	31013358	59701429	0.348741	0.673732	0.237521	0	inf	0	16	3.80033	405
3	p21.2	TEX264	NM_015926	51705190	51738339	0.439326	0.43895	PANCAN	3p	del	cent	p	1	p	0.95	31013358	59701429	0.348741	0.673732	0.237521	0	inf	0	16	3.80033	405
3	p21.2	GRM2	NM_001349117	51741048	51752625	0.43892	0.438788	PANCAN	3p	del	cent	p	1	p	0.95	31013358	59701429	0.348741	0.673732	0.237521	0	inf	0	16	3.80033	405
3	p21.2	IQCF6	NM_001143833	51812576	51813203	0.438109	0.438102	PANCAN	3p	del	cent	p	1	p	0.95	31013358	59701429	0.348741	0.673732	0.237521	0	inf	0	16	3.80033	405
3	p21.2	IQCF4	NR_038213	51851618	51853651	0.437667	0.437644	PANCAN	3p	del	cent	p	1	p	0.95	31013358	59701429	0.348741	0.673732	0.237521	0	inf	0	16	3.80033	405
3	p21.2	IQCF3	NM_001207023	51860898	51864874	0.437562	0.437517	PANCAN	3p	del	cent	p	1	p	0.95	31013358	59701429	0.348741	0.673732	0.237521	0	inf	0	16	3.80033	405
3	p21.2	IQCF2	NM_203424	51895644	51897440	0.437168	0.437148	PANCAN	3p	del	cent	p	1	p	0.95	31013358	59701429	0.348741	0.673732	0.237521	0	inf	0	16	3.80033	405
3	p21.2	IQCF5-AS1	NR_109984	51907611	51909783	0.437033	0.437008	PANCAN	3p	del	cent	p	1	p	0.95	31013358	59701429	0.348741	0.673732	0.237521	0	inf	0	16	3.80033	405
3	p21.2	IQCF5	NM_001145059	51907736	51909600	0.437031	0.43701	PANCAN	3p	del	cent	p	1	p	0.95	31013358	59701429	0.348741	0.673732	0.237521	0	inf	0	16	3.80033	405
3	p21.2	IQCF1	NM_152397	51928891	51937386	0.436792	0.436695	PANCAN	3p	del	cent	p	1	p	0.95	31013358	59701429	0.348741	0.673732	0.237521	0	inf	0	16	3.80033	405
3	p21.2	RRP9	NM_004704	51967441	51975957	0.436355	0.436258	PANCAN	3p	del	cent	p	1	p	0.95	31013358	59701429	0.348741	0.673732	0.237521	0	inf	0	16	3.80033	405
3	p21.2	PARP3	NM_005485	51976320	51982883	0.436254	0.43618	PANCAN	3p	del	cent	p	1	p	0.95	31013358	59701429	0.348741	0.673732	0.237521	0	inf	0	16	3.80033	405
3	p21.2	GPR62	NM_080865	51989329	51991520	0.436107	0.436082	PANCAN	3p	del	cent	p	1	p	0.95	31013358	59701429	0.348741	0.673732	0.237521	0	inf	0	16	3.80033	405
3	p21.2	PCBP4	NM_001174100	51991469	52001482	0.436083	0.435969	PANCAN	3p	del	cent	p	1	p	0.95	31013358	59701429	0.348741	0.673732	0.237521	0	inf	0	16	3.80033	405
3	p21.2	ABHD14B	NM_001254753	52002525	52008646	0.435957	0.435888	PANCAN	3p	del	cent	p	1	p	0.95	31013358	59701429	0.348741	0.673732	0.237521	0	inf	0	16	3.80033	405
3	p21.2	ABHD14A	NM_015407	52009041	52015216	0.435884	0.435814	PANCAN	3p	del	cent	p	1	p	0.95	31013358	59701429	0.348741	0.673732	0.237521	0	inf	0	16	3.80033	405
3	p21.2	ABHD14A-ACY1	NM_001316331	52009041	52023218	0.435884	0.435723	PANCAN	3p	del	cent	p	1	p	0.95	31013358	59701429	0.348741	0.673732	0.237521	0	inf	0	16	3.80033	405
3	p21.2	ACY1	NM_001198895	52017299	52023218	0.43579	0.435723	PANCAN	3p	del	cent	p	1	p	0.95	31013358	59701429	0.348741	0.673732	0.237521	0	inf	0	16	3.80033	405
3	p21.2	RPL29	NM_000992	52027643	52029958	0.435673	0.435647	PANCAN	3p	del	cent	p	1	p	0.95	31013358	59701429	0.348741	0.673732	0.237521	0	inf	0	16	3.80033	405
3	p21.2	DUSP7	NM_001947	52082936	52090461	0.435046	0.434961	PANCAN	3p	del	cent	p	1	p	0.95	31013358	59701429	0.348741	0.673732	0.237521	0	inf	0	16	3.80033	405
3	p21.2	LINC00696	NR_027331	52096109	52099128	0.434897	0.434863	PANCAN	3p	del	cent	p	1	p	0.95	31013358	59701429	0.348741	0.673732	0.237521	0	inf	0	16	3.80033	405
3	p21.2	POC1A	NM_001161581	52109248	52188706	0.434748	0.433848	PANCAN	3p	del	cent	p	1	p	0.95	31013358	59701429	0.348741	0.673732	0.237521	0	inf	0	16	3.80033	405
3	p21.2	ALAS1	NM_001304444	52232098	52248343	0.433357	0.433173	PANCAN	3p	del	cent	p	1	p	0.95	31013358	59701429	0.348741	0.673732	0.237521	0	inf	0	16	3.80033	405
3	p21.2	TLR9	NM_017442	52255095	52260179	0.433096	0.433039	PANCAN	3p	del	cent	p	1	p	0.95	31013358	59701429	0.348741	0.673732	0.237521	0	inf	0	16	3.80033	405
3	p21.2	TWF2	NM_007284	52262625	52273183	0.433011	0.432891	PANCAN	3p	del	cent	p	1	p	0.95	31013358	59701429	0.348741	0.673732	0.237521	0	inf	0	16	3.80033	405
3	p21.2	LOC101929054	NR_135307	52273253	52275113	0.43289	0.432869	PANCAN	3p	del	cent	p	1	p	0.95	31013358	59701429	0.348741	0.673732	0.237521	0	inf	0	16	3.80033	405
3	p21.2	PPM1M	NM_144641	52279808	52284615	0.432816	0.432762	PANCAN	3p	del	cent	p	1	p	0.95	31013358	59701429	0.348741	0.673732	0.237521	0	inf	0	16	3.80033	405
3	p21.1	WDR82	NM_025222	52288437	52312659	0.432718	0.432444	PANCAN	3p	del	cent	p	1	p	0.95	31013358	59701429	0.348741	0.673732	0.237521	0	inf	0	16	3.80033	405
3	p21.1	MIRLET7G	NR_029660	52302293	52302377	0.432561	0.432561	PANCAN	3p	del	cent	p	1	p	0.95	31013358	59701429	0.348741	0.673732	0.237521	0	inf	0	16	3.80033	405
3	p21.1	GLYCTK	NR_026699	52321835	52329272	0.43234	0.432256	PANCAN	3p	del	cent	p	1	p	0.95	31013358	59701429	0.348741	0.673732	0.237521	0	inf	0	16	3.80033	405
3	p21.1	GLYCTK-AS1	NR_046719	52322595	52323749	0.432331	0.432318	PANCAN	3p	del	cent	p	1	p	0.95	31013358	59701429	0.348741	0.673732	0.237521	0	inf	0	16	3.80033	405
3	p21.1	MIR135A1	NR_029677	52328234	52328324	0.432268	0.432267	PANCAN	3p	del	cent	p	1	p	0.95	31013358	59701429	0.348741	0.673732	0.237521	0	inf	0	16	3.80033	405
3	p21.1	DNAH1	NM_015512	52350334	52434513	0.432017	0.431064	PANCAN	3p	del	cent	p	1	p	0.95	31013358	59701429	0.348741	0.673732	0.237521	0	inf	0	16	3.80033	405
3	p21.1	BAP1	NM_004656	52435019	52444121	0.431058	0.430955	PANCAN	3p	del	cent	p	1	p	0.95	31013358	59701429	0.348741	0.673732	0.237521	0	inf	0	16	3.80033	405
3	p21.1	PHF7	NM_001321127	52444523	52457657	0.43095	0.430801	PANCAN	3p	del	cent	p	1	p	0.95	31013358	59701429	0.348741	0.673732	0.237521	0	inf	0	16	3.80033	405
3	p21.1	SEMA3G	NM_020163	52467050	52479101	0.430695	0.430559	PANCAN	3p	del	cent	p	1	p	0.95	31013358	59701429	0.348741	0.673732	0.237521	0	inf	0	16	3.80033	405
3	p21.1	TNNC1	NM_003280	52485106	52488057	0.43049	0.430457	PANCAN	3p	del	cent	p	1	p	0.95	31013358	59701429	0.348741	0.673732	0.237521	0	inf	0	16	3.80033	405
3	p21.1	NISCH	NM_007184	52489523	52527088	0.43044	0.430015	PANCAN	3p	del	cent	p	1	p	0.95	31013358	59701429	0.348741	0.673732	0.237521	0	inf	0	16	3.80033	405
3	p21.1	STAB1	NM_015136	52529355	52558511	0.429989	0.429659	PANCAN	3p	del	cent	p	1	p	0.95	31013358	59701429	0.348741	0.673732	0.237521	0	inf	0	16	3.80033	405
3	p21.1	NT5DC2	NM_022908	52558384	52569093	0.42966	0.429539	PANCAN	3p	del	cent	p	1	p	0.95	31013358	59701429	0.348741	0.673732	0.237521	0	inf	0	16	3.80033	405
3	p21.1	SMIM4	NM_001124767	52570620	52574586	0.429522	0.429477	PANCAN	3p	del	cent	p	1	p	0.95	31013358	59701429	0.348741	0.673732	0.237521	0	inf	0	16	3.80033	405
3	p21.1	PBRM1	NM_001350078	52579367	52719866	0.429423	0.427831	PANCAN	3p	del	cent	p	1	p	0.95	31013358	59701429	0.348741	0.673732	0.237521	0	inf	0	16	3.80033	405
3	p21.1	GNL3	NM_014366	52719935	52728510	0.42783	0.427733	PANCAN	3p	del	cent	p	1	p	0.95	31013358	59701429	0.348741	0.673732	0.237521	0	inf	0	16	3.80033	405
3	p21.1	SNORD136	NR_132757	52722902	52723049	0.427797	0.427795	PANCAN	3p	del	cent	p	1	p	0.95	31013358	59701429	0.348741	0.673732	0.237521	0	inf	0	16	3.80033	405
3	p21.1	SNORD19	NR_003047	52723255	52723331	0.427793	0.427792	PANCAN	3p	del	cent	p	1	p	0.95	31013358	59701429	0.348741	0.673732	0.237521	0	inf	0	16	3.80033	405
3	p21.1	SNORD19B	NR_003687	52724753	52724846	0.427776	0.427775	PANCAN	3p	del	cent	p	1	p	0.95	31013358	59701429	0.348741	0.673732	0.237521	0	inf	0	16	3.80033	405
3	p21.1	SNORD19C	NR_145744	52725393	52725460	0.427768	0.427768	PANCAN	3p	del	cent	p	1	p	0.95	31013358	59701429	0.348741	0.673732	0.237521	0	inf	0	16	3.80033	405
3	p21.1	SNORD69	NR_003057	52726751	52726828	0.427753	0.427752	PANCAN	3p	del	cent	p	1	p	0.95	31013358	59701429	0.348741	0.673732	0.237521	0	inf	0	16	3.80033	405
3	p21.1	GLT8D1	NM_001278281	52728499	52740099	0.427733	0.427602	PANCAN	3p	del	cent	p	1	p	0.95	31013358	59701429	0.348741	0.673732	0.237521	0	inf	0	16	3.80033	405
3	p21.1	SPCS1	NM_014041	52739856	52742197	0.427605	0.427578	PANCAN	3p	del	cent	p	1	p	0.95	31013358	59701429	0.348741	0.673732	0.237521	0	inf	0	16	3.80033	405
3	p21.1	NEK4	NM_003157	52742464	52804965	0.427575	0.426867	PANCAN	3p	del	cent	p	1	p	0.95	31013358	59701429	0.348741	0.673732	0.237521	0	inf	0	16	3.80033	405
3	p21.1	ITIH1	NM_002215	52811601	52826084	0.426792	0.426628	PANCAN	3p	del	cent	p	1	p	0.95	31013358	59701429	0.348741	0.673732	0.237521	0	inf	0	16	3.80033	405
3	p21.1	ITIH3	NM_002217	52828783	52843025	0.426597	0.426436	PANCAN	3p	del	cent	p	1	p	0.95	31013358	59701429	0.348741	0.673732	0.237521	0	inf	0	16	3.80033	405
3	p21.1	ITIH4	NM_001166449	52847005	52864717	0.426391	0.42619	PANCAN	3p	del	cent	p	1	p	0.95	31013358	59701429	0.348741	0.673732	0.237521	0	inf	0	16	3.80033	405
3	p21.1	ITIH4-AS1	NR_046615	52857950	52859330	0.426267	0.426251	PANCAN	3p	del	cent	p	1	p	0.95	31013358	59701429	0.348741	0.673732	0.237521	0	inf	0	16	3.80033	405
3	p21.1	MUSTN1	NM_205853	52867130	52869235	0.426163	0.426139	PANCAN	3p	del	cent	p	1	p	0.95	31013358	59701429	0.348741	0.673732	0.237521	0	inf	0	16	3.80033	405
3	p21.1	TMEM110-MUSTN1	NM_001198974	52867130	52931597	0.426163	0.425432	PANCAN	3p	del	cent	p	1	p	0.95	31013358	59701429	0.348741	0.673732	0.237521	0	inf	0	16	3.80033	405
3	p21.1	STIMATE	NM_198563	52870771	52931597	0.426122	0.425432	PANCAN	3p	del	cent	p	1	p	0.95	31013358	59701429	0.348741	0.673732	0.237521	0	inf	0	16	3.80033	405
3	p21.1	MIR8064	NR_107031	52880478	52880568	0.426012	0.426011	PANCAN	3p	del	cent	p	1	p	0.95	31013358	59701429	0.348741	0.673732	0.237521	0	inf	0	16	3.80033	405
3	p21.1	SFMBT1	NM_016329	52937582	53080089	0.425365	0.42375	PANCAN	3p	del	cent	p	1	p	0.95	31013358	59701429	0.348741	0.673732	0.237521	0	inf	0	16	3.80033	405
3	p21.1	RFT1	NM_052859	53122500	53164470	0.42327	0.422794	PANCAN	3p	del	cent	p	1	p	0.95	31013358	59701429	0.348741	0.673732	0.237521	0	inf	0	16	3.80033	405
3	p21.1	PRKCD	NM_212539	53195222	53226733	0.422446	0.422089	PANCAN	3p	del	cent	p	1	p	0.95	31013358	59701429	0.348741	0.673732	0.237521	0	inf	0	16	3.80033	405
3	p21.1	TKT	NM_001135055	53258722	53290130	0.421727	0.421371	PANCAN	3p	del	cent	p	1	p	0.95	31013358	59701429	0.348741	0.673732	0.237521	0	inf	0	16	3.80033	405
3	p21.1	DCP1A	NM_018403	53317444	53381654	0.421061	0.420334	PANCAN	3p	del	cent	p	1	p	0.95	31013358	59701429	0.348741	0.673732	0.237521	0	inf	0	16	3.80033	405
3	p21.1	SNORD38C	NR_145715	53367087	53367154	0.420499	0.420498	PANCAN	3p	del	cent	p	1	p	0.95	31013358	59701429	0.348741	0.673732	0.237521	0	inf	0	16	3.80033	405
3	p21.1	CACNA1D	NM_001128839	53529075	53846492	0.418664	0.415068	PANCAN	3p	del	cent	p	1	p	0.95	31013358	59701429	0.348741	0.673732	0.237521	0	inf	0	16	3.80033	405
3	p21.1	CHDH	NM_018397	53850323	53880420	0.415025	0.414684	PANCAN	3p	del	cent	p	1	p	0.95	31013358	59701429	0.348741	0.673732	0.237521	0	inf	0	16	3.80033	405
3	p21.1	IL17RB	NM_018725	53880576	53899827	0.414682	0.414464	PANCAN	3p	del	cent	p	1	p	0.95	31013358	59701429	0.348741	0.673732	0.237521	0	inf	0	16	3.80033	405
3	p21.1	ACTR8	NM_022899	53901093	53916229	0.41445	0.414278	PANCAN	3p	del	cent	p	1	p	0.95	31013358	59701429	0.348741	0.673732	0.237521	0	inf	0	16	3.80033	405
3	p21.1	SELENOK	NM_021237	53919002	53926042	0.414247	0.414167	PANCAN	3p	del	cent	p	1	p	0.95	31013358	59701429	0.348741	0.673732	0.237521	0	inf	0	16	3.80033	405
3	p14.3	CACNA2D3	NM_018398	54156692	55108584	0.411554	0.400771	PANCAN	3p	del	cent	p	1	p	0.95	31013358	59701429	0.348741	0.673732	0.237521	0	inf	0	16	3.80033	405
3	p14.3	ESRG	NR_027122	54666150	54673884	0.405783	0.405695	PANCAN	3p	del	cent	p	1	p	0.95	31013358	59701429	0.348741	0.673732	0.237521	0	inf	0	16	3.80033	405
3	p14.3	CACNA2D3-AS1	NR_046666	54908631	54935282	0.403036	0.402734	PANCAN	3p	del	cent	p	1	p	0.95	31013358	59701429	0.348741	0.673732	0.237521	0	inf	0	16	3.80033	405
3	p14.3	LRTM1	NM_001304389	54952380	55001115	0.40254	0.401988	PANCAN	3p	del	cent	p	1	p	0.95	31013358	59701429	0.348741	0.673732	0.237521	0	inf	0	16	3.80033	405
3	p14.3	LINC02017	NR_147142	55212199	55223242	0.399597	0.399472	PANCAN	3p	del	cent	p	1	p	0.95	31013358	59701429	0.348741	0.673732	0.237521	0	inf	0	16	3.80033	405
3	p14.3	WNT5A	NM_003392	55499742	55521670	0.396339	0.396091	PANCAN	3p	del	cent	p	1	p	0.95	31013358	59701429	0.348741	0.673732	0.237521	0	inf	0	16	3.80033	405
3	p14.3	ERC2	NR_132749	55542338	56502391	0.395857	0.384981	PANCAN	3p	del	cent	p	1	p	0.95	31013358	59701429	0.348741	0.673732	0.237521	0	inf	0	16	3.80033	405
3	p14.3	ERC2-IT1	NR_024615	55691242	55693497	0.39417	0.394144	PANCAN	3p	del	cent	p	1	p	0.95	31013358	59701429	0.348741	0.673732	0.237521	0	inf	0	16	3.80033	405
3	p14.3	MIR3938	NR_037502	55886519	55886622	0.391958	0.391957	PANCAN	3p	del	cent	p	1	p	0.95	31013358	59701429	0.348741	0.673732	0.237521	0	inf	0	16	3.80033	405
3	p14.3	CCDC66	NM_001353151	56591183	56655848	0.383975	0.383242	PANCAN	3p	del	cent	p	1	p	0.95	31013358	59701429	0.348741	0.673732	0.237521	0	inf	0	16	3.80033	405
3	p14.3	FAM208A	NM_001112736	56654159	56717135	0.383262	0.382548	PANCAN	3p	del	cent	p	1	p	0.95	31013358	59701429	0.348741	0.673732	0.237521	0	inf	0	16	3.80033	405
3	p14.3	ARHGEF3	NM_001128615	56761445	57113336	0.382046	0.37806	PANCAN	3p	del	cent	p	1	p	0.95	31013358	59701429	0.348741	0.673732	0.237521	0	inf	0	16	3.80033	405
3	p14.3	ARHGEF3-AS1	NR_046572	56974067	56994880	0.379638	0.379402	PANCAN	3p	del	cent	p	1	p	0.95	31013358	59701429	0.348741	0.673732	0.237521	0	inf	0	16	3.80033	405
3	p14.3	SPATA12	NM_181727	57094468	57109460	0.378274	0.378104	PANCAN	3p	del	cent	p	1	p	0.95	31013358	59701429	0.348741	0.673732	0.237521	0	inf	0	16	3.80033	405
3	p14.3	IL17RD	NM_001318864	57124009	57204345	0.377939	0.377029	PANCAN	3p	del	cent	p	1	p	0.95	31013358	59701429	0.348741	0.673732	0.237521	0	inf	0	16	3.80033	405
3	p14.3	HESX1	NM_003865	57231943	57234280	0.376716	0.37669	PANCAN	3p	del	cent	p	1	p	0.95	31013358	59701429	0.348741	0.673732	0.237521	0	inf	0	16	3.80033	405
3	p14.3	APPL1	NM_012096	57261764	57307498	0.376378	0.37586	PANCAN	3p	del	cent	p	1	p	0.95	31013358	59701429	0.348741	0.673732	0.237521	0	inf	0	16	3.80033	405
3	p14.3	ASB14	NM_001142733	57302378	57326710	0.375918	0.375643	PANCAN	3p	del	cent	p	1	p	0.95	31013358	59701429	0.348741	0.673732	0.237521	0	inf	0	16	3.80033	405
3	p14.3	LOC105377102	NR_135535	57303593	57312155	0.375905	0.375808	PANCAN	3p	del	cent	p	1	p	0.95	31013358	59701429	0.348741	0.673732	0.237521	0	inf	0	16	3.80033	405
3	p14.3	DNAH12	NM_001291661	57327726	57530071	0.375631	0.373339	PANCAN	3p	del	cent	p	1	p	0.95	31013358	59701429	0.348741	0.673732	0.237521	0	inf	0	16	3.80033	405
3	p14.3	PDE12	NM_001322176	57541973	57642207	0.373204	0.372069	PANCAN	3p	del	cent	p	1	p	0.95	31013358	59701429	0.348741	0.673732	0.237521	0	inf	0	16	3.80033	405
3	p14.3	ARF4	NM_001660	57557089	57583215	0.373033	0.372737	PANCAN	3p	del	cent	p	1	p	0.95	31013358	59701429	0.348741	0.673732	0.237521	0	inf	0	16	3.80033	405
3	p14.3	ARF4-AS1	NR_132369	57583515	57586642	0.372733	0.372698	PANCAN	3p	del	cent	p	1	p	0.95	31013358	59701429	0.348741	0.673732	0.237521	0	inf	0	16	3.80033	405
3	p14.3	DENND6A	NM_152678	57611180	57678816	0.37242	0.371654	PANCAN	3p	del	cent	p	1	p	0.95	31013358	59701429	0.348741	0.673732	0.237521	0	inf	0	16	3.80033	405
3	p14.3	DENND6A-DT	NR_135550	57678931	57682378	0.371653	0.371613	PANCAN	3p	del	cent	p	1	p	0.95	31013358	59701429	0.348741	0.673732	0.237521	0	inf	0	16	3.80033	405
3	p14.3	SLMAP	NM_001304420	57742982	57915741	0.370927	0.36897	PANCAN	3p	del	cent	p	1	p	0.95	31013358	59701429	0.348741	0.673732	0.237521	0	inf	0	16	3.80033	405
3	p14.3	FLNB	NM_001164317	57994126	58157982	0.368082	0.366226	PANCAN	3p	del	cent	p	1	p	0.95	31013358	59701429	0.348741	0.673732	0.237521	0	inf	0	16	3.80033	405
3	p14.3	FLNB-AS1	NR_135534	58148275	58156362	0.366336	0.366244	PANCAN	3p	del	cent	p	1	p	0.95	31013358	59701429	0.348741	0.673732	0.237521	0	inf	0	16	3.80033	405
3	p14.3	DNASE1L3	NM_004944	58178352	58196730	0.365995	0.365787	PANCAN	3p	del	cent	p	1	p	0.95	31013358	59701429	0.348741	0.673732	0.237521	0	inf	0	16	3.80033	405
3	p14.3	ABHD6	NM_001320126	58223228	58280463	0.365487	0.364838	PANCAN	3p	del	cent	p	1	p	0.95	31013358	59701429	0.348741	0.673732	0.237521	0	inf	0	16	3.80033	405
3	p14.3	HTD2	NM_001348714	58291971	58305920	0.364708	0.36455	PANCAN	3p	del	cent	p	1	p	0.95	31013358	59701429	0.348741	0.673732	0.237521	0	inf	0	16	3.80033	405
3	p14.3	RPP14	NM_001098783	58291971	58305920	0.364708	0.36455	PANCAN	3p	del	cent	p	1	p	0.95	31013358	59701429	0.348741	0.673732	0.237521	0	inf	0	16	3.80033	405
3	p14.3	PXK	NM_001349494	58318616	58411854	0.364406	0.36335	PANCAN	3p	del	cent	p	1	p	0.95	31013358	59701429	0.348741	0.673732	0.237521	0	inf	0	16	3.80033	405
3	p14.3	PDHB	NM_001315536	58413356	58419579	0.363333	0.363262	PANCAN	3p	del	cent	p	1	p	0.95	31013358	59701429	0.348741	0.673732	0.237521	0	inf	0	16	3.80033	405
3	p14.3	KCTD6	NM_001128214	58477822	58488087	0.362602	0.362486	PANCAN	3p	del	cent	p	1	p	0.95	31013358	59701429	0.348741	0.673732	0.237521	0	inf	0	16	3.80033	405
3	p14.3	ACOX2	NM_003500	58490862	58522929	0.362455	0.362091	PANCAN	3p	del	cent	p	1	p	0.95	31013358	59701429	0.348741	0.673732	0.237521	0	inf	0	16	3.80033	405
3	p14.3	FAM107A	NM_001282714	58549838	58613337	0.361787	0.361067	PANCAN	3p	del	cent	p	1	p	0.95	31013358	59701429	0.348741	0.673732	0.237521	0	inf	0	16	3.80033	405
3	p14.2	FAM3D-AS1	NR_134853	58592806	58620167	0.3613	0.36099	PANCAN	3p	del	cent	p	1	p	0.95	31013358	59701429	0.348741	0.673732	0.237521	0	inf	0	16	3.80033	405
3	p14.2	FAM3D	NM_138805	58619669	58652561	0.360995	0.360623	PANCAN	3p	del	cent	p	1	p	0.95	31013358	59701429	0.348741	0.673732	0.237521	0	inf	0	16	3.80033	405
3	p14.2	C3orf67	NM_001351531	58727732	59035758	0.359771	0.356282	PANCAN	3p	del	cent	p	1	p	0.95	31013358	59701429	0.348741	0.673732	0.237521	0	inf	0	16	3.80033	405
3	p14.2	C3orf67-AS1	NR_110820	58810196	59004819	0.358837	0.356632	PANCAN	3p	del	cent	p	1	p	0.95	31013358	59701429	0.348741	0.673732	0.237521	0	inf	0	16	3.80033	405
3	p14.2	LOC339902	NR_149028	59623021	59644223	0.349629	0.349389	PANCAN	3p	del	cent	p	1	p	0.95	31013358	59701429	0.348741	0.673732	0.237521	0	inf	0	16	3.80033	405
3	p21.31	FAM240A	NM_001195442	46653924	46668033	0.503451	0.503611	PANCAN	3p	amp	tel	n	1	n	0.95	46644268	52129042	0.503342	0.565476	0.233785	0	inf	0	16	3.74056	161
3	p21.31	ALS2CL	NM_147129	46710484	46735203	0.504092	0.504372	PANCAN	3p	amp	tel	n	1	n	0.95	46644268	52129042	0.503342	0.565476	0.233785	0	inf	0	16	3.74056	161
3	p21.31	TMIE	NM_147196	46742822	46752413	0.504458	0.504567	PANCAN	3p	amp	tel	n	1	n	0.95	46644268	52129042	0.503342	0.565476	0.233785	0	inf	0	16	3.74056	161
3	p21.31	PRSS50	NM_013270	46753605	46759373	0.504581	0.504646	PANCAN	3p	amp	tel	n	1	n	0.95	46644268	52129042	0.503342	0.565476	0.233785	0	inf	0	16	3.74056	161
3	p21.31	PRSS46P	NR_147121	46761072	46777917	0.504665	0.504856	PANCAN	3p	amp	tel	n	1	n	0.95	46644268	52129042	0.503342	0.565476	0.233785	0	inf	0	16	3.74056	161
3	p21.31	PRSS45	NM_199183	46783580	46786245	0.50492	0.50495	PANCAN	3p	amp	tel	n	1	n	0.95	46644268	52129042	0.503342	0.565476	0.233785	0	inf	0	16	3.74056	161
3	p21.31	PRSS42	NM_182702	46871032	46875585	0.505911	0.505962	PANCAN	3p	amp	tel	n	1	n	0.95	46644268	52129042	0.503342	0.565476	0.233785	0	inf	0	16	3.74056	161
3	p21.31	MYL3	NM_000258	46899356	46904973	0.506232	0.506295	PANCAN	3p	amp	tel	n	1	n	0.95	46644268	52129042	0.503342	0.565476	0.233785	0	inf	0	16	3.74056	161
3	p21.31	PTH1R	NM_000316	46919235	46945289	0.506457	0.506752	PANCAN	3p	amp	tel	n	1	n	0.95	46644268	52129042	0.503342	0.565476	0.233785	0	inf	0	16	3.74056	161
3	p21.31	CCDC12	NM_144716	46963219	47023500	0.506955	0.507638	PANCAN	3p	amp	tel	n	1	n	0.95	46644268	52129042	0.503342	0.565476	0.233785	0	inf	0	16	3.74056	161
3	p21.31	NBEAL2	NM_015175	47021172	47051194	0.507612	0.507952	PANCAN	3p	amp	tel	n	1	n	0.95	46644268	52129042	0.503342	0.565476	0.233785	0	inf	0	16	3.74056	161
3	p21.31	NRADDP	NR_024046	47053031	47054957	0.507973	0.507994	PANCAN	3p	amp	tel	n	1	n	0.95	46644268	52129042	0.503342	0.565476	0.233785	0	inf	0	16	3.74056	161
3	p21.31	SETD2	NR_146158	47057897	47205467	0.508028	0.509699	PANCAN	3p	amp	tel	n	1	n	0.95	46644268	52129042	0.503342	0.565476	0.233785	0	inf	0	16	3.74056	161
3	p21.31	KIF9-AS1	NR_033373	47205859	47285606	0.509704	0.510607	PANCAN	3p	amp	tel	n	1	n	0.95	46644268	52129042	0.503342	0.565476	0.233785	0	inf	0	16	3.74056	161
3	p21.31	KIF9	NM_022342	47269515	47324337	0.510425	0.511046	PANCAN	3p	amp	tel	n	1	n	0.95	46644268	52129042	0.503342	0.565476	0.233785	0	inf	0	16	3.74056	161
3	p21.31	SNORD13J	NR_145712	47292008	47292099	0.51068	0.510681	PANCAN	3p	amp	tel	n	1	n	0.95	46644268	52129042	0.503342	0.565476	0.233785	0	inf	0	16	3.74056	161
3	p21.31	KLHL18	NM_025010	47324329	47388306	0.511046	0.511771	PANCAN	3p	amp	tel	n	1	n	0.95	46644268	52129042	0.503342	0.565476	0.233785	0	inf	0	16	3.74056	161
3	p21.31	PTPN23	NM_001304482	47422471	47454931	0.512158	0.512525	PANCAN	3p	amp	tel	n	1	n	0.95	46644268	52129042	0.503342	0.565476	0.233785	0	inf	0	16	3.74056	161
3	p21.31	SCAP	NM_001320044	47455174	47517449	0.512528	0.513234	PANCAN	3p	amp	tel	n	1	n	0.95	46644268	52129042	0.503342	0.565476	0.233785	0	inf	0	16	3.74056	161
3	p21.31	ELP6	NM_001031703	47537129	47555199	0.513457	0.513661	PANCAN	3p	amp	tel	n	1	n	0.95	46644268	52129042	0.503342	0.565476	0.233785	0	inf	0	16	3.74056	161
3	p21.31	CSPG5	NM_001206945	47603727	47621730	0.514211	0.514415	PANCAN	3p	amp	tel	n	1	n	0.95	46644268	52129042	0.503342	0.565476	0.233785	0	inf	0	16	3.74056	161
3	p21.31	SMARCC1	NM_003074	47627377	47823405	0.514479	0.5167	PANCAN	3p	amp	tel	n	1	n	0.95	46644268	52129042	0.503342	0.565476	0.233785	0	inf	0	16	3.74056	161
3	p21.31	SNORD146	NR_145791	47703054	47703184	0.515336	0.515338	PANCAN	3p	amp	tel	n	1	n	0.95	46644268	52129042	0.503342	0.565476	0.233785	0	inf	0	16	3.74056	161
3	p21.31	DHX30	NM_001330990	47844398	47891686	0.516938	0.517473	PANCAN	3p	amp	tel	n	1	n	0.95	46644268	52129042	0.503342	0.565476	0.233785	0	inf	0	16	3.74056	161
3	p21.31	MIR1226	NR_031595	47891044	47891119	0.517466	0.517467	PANCAN	3p	amp	tel	n	1	n	0.95	46644268	52129042	0.503342	0.565476	0.233785	0	inf	0	16	3.74056	161
3	p21.31	MAP4	NM_002375	47892179	48130769	0.517479	0.520182	PANCAN	3p	amp	tel	n	1	n	0.95	46644268	52129042	0.503342	0.565476	0.233785	0	inf	0	16	3.74056	161
3	p21.31	CDC25A	NM_201567	48198667	48229801	0.520951	0.521304	PANCAN	3p	amp	tel	n	1	n	0.95	46644268	52129042	0.503342	0.565476	0.233785	0	inf	0	16	3.74056	161
3	p21.31	MIR4443	NR_039645	48238053	48238106	0.521397	0.521398	PANCAN	3p	amp	tel	n	1	n	0.95	46644268	52129042	0.503342	0.565476	0.233785	0	inf	0	16	3.74056	161
3	p21.31	CAMP	NM_004345	48264836	48266981	0.5217	0.521725	PANCAN	3p	amp	tel	n	1	n	0.95	46644268	52129042	0.503342	0.565476	0.233785	0	inf	0	16	3.74056	161
3	p21.31	ZNF589	NM_016089	48282595	48312479	0.521902	0.52224	PANCAN	3p	amp	tel	n	1	n	0.95	46644268	52129042	0.503342	0.565476	0.233785	0	inf	0	16	3.74056	161
3	p21.31	FCF1P2	NR_134638	48331768	48333168	0.522459	0.522475	PANCAN	3p	amp	tel	n	1	n	0.95	46644268	52129042	0.503342	0.565476	0.233785	0	inf	0	16	3.74056	161
3	p21.31	NME6	NM_001308435	48333806	48343175	0.522482	0.522588	PANCAN	3p	amp	tel	n	1	n	0.95	46644268	52129042	0.503342	0.565476	0.233785	0	inf	0	16	3.74056	161
3	p21.31	SPINK8	NM_001080525	48348335	48369831	0.522646	0.52289	PANCAN	3p	amp	tel	n	1	n	0.95	46644268	52129042	0.503342	0.565476	0.233785	0	inf	0	16	3.74056	161
3	p21.31	MIR2115	NR_031749	48357849	48357949	0.522754	0.522755	PANCAN	3p	amp	tel	n	1	n	0.95	46644268	52129042	0.503342	0.565476	0.233785	0	inf	0	16	3.74056	161
3	p21.31	FBXW12	NM_001159929	48413708	48436190	0.523387	0.523642	PANCAN	3p	amp	tel	n	1	n	0.95	46644268	52129042	0.503342	0.565476	0.233785	0	inf	0	16	3.74056	161
3	p21.31	PLXNB1	NM_001130082	48445260	48471460	0.523744	0.524041	PANCAN	3p	amp	tel	n	1	n	0.95	46644268	52129042	0.503342	0.565476	0.233785	0	inf	0	16	3.74056	161
3	p21.31	CCDC51	NM_024661	48473579	48481529	0.524065	0.524155	PANCAN	3p	amp	tel	n	1	n	0.95	46644268	52129042	0.503342	0.565476	0.233785	0	inf	0	16	3.74056	161
3	p21.31	TMA7	NM_015933	48481647	48485616	0.524157	0.524202	PANCAN	3p	amp	tel	n	1	n	0.95	46644268	52129042	0.503342	0.565476	0.233785	0	inf	0	16	3.74056	161
3	p21.31	ATRIP	NM_001271022	48488113	48507054	0.52423	0.524444	PANCAN	3p	amp	tel	n	1	n	0.95	46644268	52129042	0.503342	0.565476	0.233785	0	inf	0	16	3.74056	161
3	p21.31	TREX1	NM_007248	48506918	48509044	0.524443	0.524467	PANCAN	3p	amp	tel	n	1	n	0.95	46644268	52129042	0.503342	0.565476	0.233785	0	inf	0	16	3.74056	161
3	p21.31	SHISA5	NM_001272066	48509196	48542259	0.524469	0.524843	PANCAN	3p	amp	tel	n	1	n	0.95	46644268	52129042	0.503342	0.565476	0.233785	0	inf	0	16	3.74056	161
3	p21.31	PFKFB4	NM_001317136	48555116	48598613	0.524989	0.525482	PANCAN	3p	amp	tel	n	1	n	0.95	46644268	52129042	0.503342	0.565476	0.233785	0	inf	0	16	3.74056	161
3	p21.31	MIR6823	NR_106881	48587393	48587454	0.525354	0.525355	PANCAN	3p	amp	tel	n	1	n	0.95	46644268	52129042	0.503342	0.565476	0.233785	0	inf	0	16	3.74056	161
3	p21.31	UCN2	NM_033199	48599150	48601201	0.525488	0.525511	PANCAN	3p	amp	tel	n	1	n	0.95	46644268	52129042	0.503342	0.565476	0.233785	0	inf	0	16	3.74056	161
3	p21.31	COL7A1	NM_000094	48601505	48632593	0.525514	0.525867	PANCAN	3p	amp	tel	n	1	n	0.95	46644268	52129042	0.503342	0.565476	0.233785	0	inf	0	16	3.74056	161
3	p21.31	MIR711	NR_031756	48616334	48616410	0.525682	0.525683	PANCAN	3p	amp	tel	n	1	n	0.95	46644268	52129042	0.503342	0.565476	0.233785	0	inf	0	16	3.74056	161
3	p21.31	UQCRC1	NM_003365	48636431	48647098	0.52591	0.526031	PANCAN	3p	amp	tel	n	1	n	0.95	46644268	52129042	0.503342	0.565476	0.233785	0	inf	0	16	3.74056	161
3	p21.31	SNORA94	NR_132776	48642352	48642583	0.525977	0.52598	PANCAN	3p	amp	tel	n	1	n	0.95	46644268	52129042	0.503342	0.565476	0.233785	0	inf	0	16	3.74056	161
3	p21.31	TMEM89	NM_001008269	48658191	48659288	0.526157	0.526169	PANCAN	3p	amp	tel	n	1	n	0.95	46644268	52129042	0.503342	0.565476	0.233785	0	inf	0	16	3.74056	161
3	p21.31	SLC26A6	NM_001281733	48663155	48672926	0.526213	0.526323	PANCAN	3p	amp	tel	n	1	n	0.95	46644268	52129042	0.503342	0.565476	0.233785	0	inf	0	16	3.74056	161
3	p21.31	MIR6824	NR_106882	48671068	48671131	0.526302	0.526303	PANCAN	3p	amp	tel	n	1	n	0.95	46644268	52129042	0.503342	0.565476	0.233785	0	inf	0	16	3.74056	161
3	p21.31	CELSR3	NM_001407	48673895	48700348	0.526334	0.526634	PANCAN	3p	amp	tel	n	1	n	0.95	46644268	52129042	0.503342	0.565476	0.233785	0	inf	0	16	3.74056	161
3	p21.31	MIR4793	NR_039956	48681626	48681713	0.526422	0.526423	PANCAN	3p	amp	tel	n	1	n	0.95	46644268	52129042	0.503342	0.565476	0.233785	0	inf	0	16	3.74056	161
3	p21.31	CELSR3-AS1	NR_111921	48701200	48706603	0.526644	0.526705	PANCAN	3p	amp	tel	n	1	n	0.95	46644268	52129042	0.503342	0.565476	0.233785	0	inf	0	16	3.74056	161
3	p21.31	NCKIPSD	NM_016453	48711271	48723366	0.526758	0.526895	PANCAN	3p	amp	tel	n	1	n	0.95	46644268	52129042	0.503342	0.565476	0.233785	0	inf	0	16	3.74056	161
3	p21.31	IP6K2	NM_016291	48725435	48754711	0.526918	0.52725	PANCAN	3p	amp	tel	n	1	n	0.95	46644268	52129042	0.503342	0.565476	0.233785	0	inf	0	16	3.74056	161
3	p21.31	PRKAR2A	NM_004157	48784011	48885283	0.527582	0.528729	PANCAN	3p	amp	tel	n	1	n	0.95	46644268	52129042	0.503342	0.565476	0.233785	0	inf	0	16	3.74056	161
3	p21.31	PRKAR2A-AS1	NR_109996	48885369	48889415	0.52873	0.528776	PANCAN	3p	amp	tel	n	1	n	0.95	46644268	52129042	0.503342	0.565476	0.233785	0	inf	0	16	3.74056	161
3	p21.31	SLC25A20	NM_000387	48894355	48936426	0.528832	0.529308	PANCAN	3p	amp	tel	n	1	n	0.95	46644268	52129042	0.503342	0.565476	0.233785	0	inf	0	16	3.74056	161
3	p21.31	ARIH2OS	NM_001123040	48955220	48956818	0.529521	0.52954	PANCAN	3p	amp	tel	n	1	n	0.95	46644268	52129042	0.503342	0.565476	0.233785	0	inf	0	16	3.74056	161
3	p21.31	ARIH2	NM_001349224	48956252	49022971	0.529533	0.530289	PANCAN	3p	amp	tel	n	1	n	0.95	46644268	52129042	0.503342	0.565476	0.233785	0	inf	0	16	3.74056	161
3	p21.31	P4HTM	NM_177939	49027340	49044581	0.530338	0.530534	PANCAN	3p	amp	tel	n	1	n	0.95	46644268	52129042	0.503342	0.565476	0.233785	0	inf	0	16	3.74056	161
3	p21.31	WDR6	NM_001320546	49044494	49053386	0.530533	0.530633	PANCAN	3p	amp	tel	n	1	n	0.95	46644268	52129042	0.503342	0.565476	0.233785	0	inf	0	16	3.74056	161
3	p21.31	DALRD3	NM_018114	49052920	49058504	0.530628	0.530691	PANCAN	3p	amp	tel	n	1	n	0.95	46644268	52129042	0.503342	0.565476	0.233785	0	inf	0	16	3.74056	161
3	p21.31	MIR425	NR_029948	49057580	49057667	0.530681	0.530682	PANCAN	3p	amp	tel	n	1	n	0.95	46644268	52129042	0.503342	0.565476	0.233785	0	inf	0	16	3.74056	161
3	p21.31	NDUFAF3	NM_199074	49057907	49060926	0.530685	0.530719	PANCAN	3p	amp	tel	n	1	n	0.95	46644268	52129042	0.503342	0.565476	0.233785	0	inf	0	16	3.74056	161
3	p21.31	MIR191	NR_029690	49058050	49058142	0.530686	0.530687	PANCAN	3p	amp	tel	n	1	n	0.95	46644268	52129042	0.503342	0.565476	0.233785	0	inf	0	16	3.74056	161
3	p21.31	IMPDH2	NM_000884	49061761	49066875	0.530728	0.530786	PANCAN	3p	amp	tel	n	1	n	0.95	46644268	52129042	0.503342	0.565476	0.233785	0	inf	0	16	3.74056	161
3	p21.31	QRICH1	NM_198880	49067139	49131806	0.530789	0.531522	PANCAN	3p	amp	tel	n	1	n	0.95	46644268	52129042	0.503342	0.565476	0.233785	0	inf	0	16	3.74056	161
3	p21.31	QARS	NM_001272073	49133364	49142562	0.531539	0.531644	PANCAN	3p	amp	tel	n	1	n	0.95	46644268	52129042	0.503342	0.565476	0.233785	0	inf	0	16	3.74056	161
3	p21.31	MIR6890	NR_106950	49137286	49137347	0.531584	0.531585	PANCAN	3p	amp	tel	n	1	n	0.95	46644268	52129042	0.503342	0.565476	0.233785	0	inf	0	16	3.74056	161
3	p21.31	USP19	NM_001351101	49145478	49158371	0.531677	0.531823	PANCAN	3p	amp	tel	n	1	n	0.95	46644268	52129042	0.503342	0.565476	0.233785	0	inf	0	16	3.74056	161
3	p21.31	LAMB2	NM_002292	49158546	49170599	0.531825	0.531961	PANCAN	3p	amp	tel	n	1	n	0.95	46644268	52129042	0.503342	0.565476	0.233785	0	inf	0	16	3.74056	161
3	p21.31	LAMB2P1	NR_004405	49190291	49191834	0.532184	0.532202	PANCAN	3p	amp	tel	n	1	n	0.95	46644268	52129042	0.503342	0.565476	0.233785	0	inf	0	16	3.74056	161
3	p21.31	CCDC71	NM_022903	49199967	49203785	0.532294	0.532337	PANCAN	3p	amp	tel	n	1	n	0.95	46644268	52129042	0.503342	0.565476	0.233785	0	inf	0	16	3.74056	161
3	p21.31	KLHDC8B	NM_173546	49209017	49213919	0.532397	0.532452	PANCAN	3p	amp	tel	n	1	n	0.95	46644268	52129042	0.503342	0.565476	0.233785	0	inf	0	16	3.74056	161
3	p21.31	C3orf84	NM_001080528	49215068	49229291	0.532465	0.532626	PANCAN	3p	amp	tel	n	1	n	0.95	46644268	52129042	0.503342	0.565476	0.233785	0	inf	0	16	3.74056	161
3	p21.31	CCDC36	NM_178173	49235860	49295537	0.532701	0.533377	PANCAN	3p	amp	tel	n	1	n	0.95	46644268	52129042	0.503342	0.565476	0.233785	0	inf	0	16	3.74056	161
3	p21.31	C3orf62	NM_198562	49306029	49314508	0.533496	0.533592	PANCAN	3p	amp	tel	n	1	n	0.95	46644268	52129042	0.503342	0.565476	0.233785	0	inf	0	16	3.74056	161
3	p21.31	MIR4271	NR_036233	49311552	49311619	0.533558	0.533559	PANCAN	3p	amp	tel	n	1	n	0.95	46644268	52129042	0.503342	0.565476	0.233785	0	inf	0	16	3.74056	161
3	p21.31	USP4	NM_003363	49314576	49377536	0.533592	0.534306	PANCAN	3p	amp	tel	n	1	n	0.95	46644268	52129042	0.503342	0.565476	0.233785	0	inf	0	16	3.74056	161
3	p21.31	GPX1	NM_001329455	49394603	49396033	0.534499	0.534515	PANCAN	3p	amp	tel	n	1	n	0.95	46644268	52129042	0.503342	0.565476	0.233785	0	inf	0	16	3.74056	161
3	p21.31	RHOA	NM_001313943	49396568	49449530	0.534521	0.535121	PANCAN	3p	amp	tel	n	1	n	0.95	46644268	52129042	0.503342	0.565476	0.233785	0	inf	0	16	3.74056	161
3	p21.31	TCTA	NM_022171	49449638	49453909	0.535122	0.535171	PANCAN	3p	amp	tel	n	1	n	0.95	46644268	52129042	0.503342	0.565476	0.233785	0	inf	0	16	3.74056	161
3	p21.31	AMT	NR_028435	49454210	49460111	0.535174	0.535241	PANCAN	3p	amp	tel	n	1	n	0.95	46644268	52129042	0.503342	0.565476	0.233785	0	inf	0	16	3.74056	161
3	p21.31	NICN1	NM_032316	49459765	49466757	0.535237	0.535316	PANCAN	3p	amp	tel	n	1	n	0.95	46644268	52129042	0.503342	0.565476	0.233785	0	inf	0	16	3.74056	161
3	p21.31	DAG1	NM_001177643	49506135	49573051	0.535762	0.53652	PANCAN	3p	amp	tel	n	1	n	0.95	46644268	52129042	0.503342	0.565476	0.233785	0	inf	0	16	3.74056	161
3	p21.31	BSN-AS2	NR_038866	49586738	49591799	0.536676	0.536733	PANCAN	3p	amp	tel	n	1	n	0.95	46644268	52129042	0.503342	0.565476	0.233785	0	inf	0	16	3.74056	161
3	p21.31	BSN	NM_003458	49591921	49708982	0.536734	0.53806	PANCAN	3p	amp	tel	n	1	n	0.95	46644268	52129042	0.503342	0.565476	0.233785	0	inf	0	16	3.74056	161
3	p21.31	APEH	NM_001640	49711434	49720934	0.538088	0.538196	PANCAN	3p	amp	tel	n	1	n	0.95	46644268	52129042	0.503342	0.565476	0.233785	0	inf	0	16	3.74056	161
3	p21.31	MST1	NM_020998	49721379	49726196	0.538201	0.538255	PANCAN	3p	amp	tel	n	1	n	0.95	46644268	52129042	0.503342	0.565476	0.233785	0	inf	0	16	3.74056	161
3	p21.31	RNF123	NM_022064	49726931	49758962	0.538264	0.538627	PANCAN	3p	amp	tel	n	1	n	0.95	46644268	52129042	0.503342	0.565476	0.233785	0	inf	0	16	3.74056	161
3	p21.31	AMIGO3	NM_198722	49754266	49757238	0.538573	0.538607	PANCAN	3p	amp	tel	n	1	n	0.95	46644268	52129042	0.503342	0.565476	0.233785	0	inf	0	16	3.74056	161
3	p21.31	GMPPB	NM_013334	49758908	49761407	0.538626	0.538654	PANCAN	3p	amp	tel	n	1	n	0.95	46644268	52129042	0.503342	0.565476	0.233785	0	inf	0	16	3.74056	161
3	p21.31	IP6K1	NM_153273	49761727	49823973	0.538658	0.539363	PANCAN	3p	amp	tel	n	1	n	0.95	46644268	52129042	0.503342	0.565476	0.233785	0	inf	0	16	3.74056	161
3	p21.31	CDHR4	NM_001007540	49828166	49837268	0.539411	0.539514	PANCAN	3p	amp	tel	n	1	n	0.95	46644268	52129042	0.503342	0.565476	0.233785	0	inf	0	16	3.74056	161
3	p21.31	FAM212A	NM_203370	49840686	49842463	0.539552	0.539572	PANCAN	3p	amp	tel	n	1	n	0.95	46644268	52129042	0.503342	0.565476	0.233785	0	inf	0	16	3.74056	161
3	p21.31	UBA7	NM_003335	49842637	49851391	0.539574	0.539674	PANCAN	3p	amp	tel	n	1	n	0.95	46644268	52129042	0.503342	0.565476	0.233785	0	inf	0	16	3.74056	161
3	p21.31	MIR5193	NR_049825	49843569	49843678	0.539585	0.539586	PANCAN	3p	amp	tel	n	1	n	0.95	46644268	52129042	0.503342	0.565476	0.233785	0	inf	0	16	3.74056	161
3	p21.31	TRAIP	NM_005879	49866027	49893992	0.539839	0.540156	PANCAN	3p	amp	tel	n	1	n	0.95	46644268	52129042	0.503342	0.565476	0.233785	0	inf	0	16	3.74056	161
3	p21.31	CAMKV	NM_001320147	49895413	49907655	0.540172	0.540311	PANCAN	3p	amp	tel	n	1	n	0.95	46644268	52129042	0.503342	0.565476	0.233785	0	inf	0	16	3.74056	161
3	p21.31	MST1R	NM_001244937	49924435	49941070	0.540501	0.54069	PANCAN	3p	amp	tel	n	1	n	0.95	46644268	52129042	0.503342	0.565476	0.233785	0	inf	0	16	3.74056	161
3	p21.31	MON1A	NM_001142501	49946301	49967445	0.540749	0.540988	PANCAN	3p	amp	tel	n	1	n	0.95	46644268	52129042	0.503342	0.565476	0.233785	0	inf	0	16	3.74056	161
3	p21.31	RBM6	NM_001349193	49977476	50114685	0.541102	0.542656	PANCAN	3p	amp	tel	n	1	n	0.95	46644268	52129042	0.503342	0.565476	0.233785	0	inf	0	16	3.74056	161
3	p21.31	RBM5	NR_036627	50126340	50156397	0.542788	0.543129	PANCAN	3p	amp	tel	n	1	n	0.95	46644268	52129042	0.503342	0.565476	0.233785	0	inf	0	16	3.74056	161
3	p21.31	RBM5-AS1	NR_045388	50137035	50138421	0.54291	0.542925	PANCAN	3p	amp	tel	n	1	n	0.95	46644268	52129042	0.503342	0.565476	0.233785	0	inf	0	16	3.74056	161
3	p21.31	SEMA3F-AS1	NR_135301	50153454	50193518	0.543096	0.543549	PANCAN	3p	amp	tel	n	1	n	0.95	46644268	52129042	0.503342	0.565476	0.233785	0	inf	0	16	3.74056	161
3	p21.31	SEMA3F	NM_001318798	50192477	50226508	0.543538	0.543923	PANCAN	3p	amp	tel	n	1	n	0.95	46644268	52129042	0.503342	0.565476	0.233785	0	inf	0	16	3.74056	161
3	p21.31	MIR566	NR_030291	50210758	50210852	0.543745	0.543746	PANCAN	3p	amp	tel	n	1	n	0.95	46644268	52129042	0.503342	0.565476	0.233785	0	inf	0	16	3.74056	161
3	p21.31	GNAT1	NM_144499	50229042	50235129	0.543952	0.544021	PANCAN	3p	amp	tel	n	1	n	0.95	46644268	52129042	0.503342	0.565476	0.233785	0	inf	0	16	3.74056	161
3	p21.31	SLC38A3	NM_006841	50242678	50258411	0.544106	0.544285	PANCAN	3p	amp	tel	n	1	n	0.95	46644268	52129042	0.503342	0.565476	0.233785	0	inf	0	16	3.74056	161
3	p21.31	GNAI2	NM_001282619	50264119	50296786	0.544349	0.544719	PANCAN	3p	amp	tel	n	1	n	0.95	46644268	52129042	0.503342	0.565476	0.233785	0	inf	0	16	3.74056	161
3	p21.31	MIR5787	NR_106714	50264867	50264922	0.544358	0.544358	PANCAN	3p	amp	tel	n	1	n	0.95	46644268	52129042	0.503342	0.565476	0.233785	0	inf	0	16	3.74056	161
3	p21.31	SEMA3B-AS1	NR_110702	50304072	50304803	0.544802	0.54481	PANCAN	3p	amp	tel	n	1	n	0.95	46644268	52129042	0.503342	0.565476	0.233785	0	inf	0	16	3.74056	161
3	p21.31	SEMA3B	NM_004636	50304989	50314602	0.544812	0.544921	PANCAN	3p	amp	tel	n	1	n	0.95	46644268	52129042	0.503342	0.565476	0.233785	0	inf	0	16	3.74056	161
3	p21.31	MIR6872	NR_106932	50310666	50310728	0.544876	0.544877	PANCAN	3p	amp	tel	n	1	n	0.95	46644268	52129042	0.503342	0.565476	0.233785	0	inf	0	16	3.74056	161
3	p21.31	LSMEM2	NM_153215	50316457	50325545	0.544942	0.545045	PANCAN	3p	amp	tel	n	1	n	0.95	46644268	52129042	0.503342	0.565476	0.233785	0	inf	0	16	3.74056	161
3	p21.31	IFRD2	NM_006764	50325162	50330026	0.545041	0.545096	PANCAN	3p	amp	tel	n	1	n	0.95	46644268	52129042	0.503342	0.565476	0.233785	0	inf	0	16	3.74056	161
3	p21.31	HYAL3	NM_003549	50330258	50336899	0.545098	0.545174	PANCAN	3p	amp	tel	n	1	n	0.95	46644268	52129042	0.503342	0.565476	0.233785	0	inf	0	16	3.74056	161
3	p21.31	NAT6	NM_012191	50333832	50336852	0.545139	0.545173	PANCAN	3p	amp	tel	n	1	n	0.95	46644268	52129042	0.503342	0.565476	0.233785	0	inf	0	16	3.74056	161
3	p21.31	HYAL1	NM_153281	50337319	50349812	0.545178	0.54532	PANCAN	3p	amp	tel	n	1	n	0.95	46644268	52129042	0.503342	0.565476	0.233785	0	inf	0	16	3.74056	161
3	p21.31	HYAL2	NM_003773	50355220	50360281	0.545381	0.545439	PANCAN	3p	amp	tel	n	1	n	0.95	46644268	52129042	0.503342	0.565476	0.233785	0	inf	0	16	3.74056	161
3	p21.31	TUSC2	NM_007275	50362339	50365669	0.545462	0.5455	PANCAN	3p	amp	tel	n	1	n	0.95	46644268	52129042	0.503342	0.565476	0.233785	0	inf	0	16	3.74056	161
3	p21.31	RASSF1	NM_007182	50367216	50378367	0.545517	0.545643	PANCAN	3p	amp	tel	n	1	n	0.95	46644268	52129042	0.503342	0.565476	0.233785	0	inf	0	16	3.74056	161
3	p21.31	RASSF1-AS1	NR_109831	50374941	50375727	0.545605	0.545614	PANCAN	3p	amp	tel	n	1	n	0.95	46644268	52129042	0.503342	0.565476	0.233785	0	inf	0	16	3.74056	161
3	p21.31	ZMYND10	NM_015896	50378536	50383177	0.545645	0.545698	PANCAN	3p	amp	tel	n	1	n	0.95	46644268	52129042	0.503342	0.565476	0.233785	0	inf	0	16	3.74056	161
3	p21.31	NPRL2	NM_006545	50384918	50388486	0.545718	0.545758	PANCAN	3p	amp	tel	n	1	n	0.95	46644268	52129042	0.503342	0.565476	0.233785	0	inf	0	16	3.74056	161
3	p21.31	CYB561D2	NR_111912	50388125	50405628	0.545754	0.545952	PANCAN	3p	amp	tel	n	1	n	0.95	46644268	52129042	0.503342	0.565476	0.233785	0	inf	0	16	3.74056	161
3	p21.31	TMEM115	NM_007024	50392179	50396939	0.5458	0.545854	PANCAN	3p	amp	tel	n	1	n	0.95	46644268	52129042	0.503342	0.565476	0.233785	0	inf	0	16	3.74056	161
3	p21.31	CACNA2D2	NM_001291101	50400043	50541675	0.545889	0.547493	PANCAN	3p	amp	tel	n	1	n	0.95	46644268	52129042	0.503342	0.565476	0.233785	0	inf	0	16	3.74056	161
3	p21.2	C3orf18	NM_001171741	50595455	50608458	0.548103	0.54825	PANCAN	3p	amp	tel	n	1	n	0.95	46644268	52129042	0.503342	0.565476	0.233785	0	inf	0	16	3.74056	161
3	p21.2	HEMK1	NM_001317851	50606582	50622421	0.548229	0.548408	PANCAN	3p	amp	tel	n	1	n	0.95	46644268	52129042	0.503342	0.565476	0.233785	0	inf	0	16	3.74056	161
3	p21.2	CISH	NM_145071	50643884	50649262	0.548651	0.548712	PANCAN	3p	amp	tel	n	1	n	0.95	46644268	52129042	0.503342	0.565476	0.233785	0	inf	0	16	3.74056	161
3	p21.2	MAPKAPK3	NM_001243926	50649292	50686728	0.548713	0.549137	PANCAN	3p	amp	tel	n	1	n	0.95	46644268	52129042	0.503342	0.565476	0.233785	0	inf	0	16	3.74056	161
3	p21.2	MIR4787	NR_039950	50712510	50712594	0.549429	0.54943	PANCAN	3p	amp	tel	n	1	n	0.95	46644268	52129042	0.503342	0.565476	0.233785	0	inf	0	16	3.74056	161
3	p21.2	DOCK3	NM_004947	50712671	51421629	0.549431	0.557462	PANCAN	3p	amp	tel	n	1	n	0.95	46644268	52129042	0.503342	0.565476	0.233785	0	inf	0	16	3.74056	161
3	p21.2	MANF	NM_006010	51422667	51426828	0.557474	0.557521	PANCAN	3p	amp	tel	n	1	n	0.95	46644268	52129042	0.503342	0.565476	0.233785	0	inf	0	16	3.74056	161
3	p21.2	RBM15B	NM_013286	51428698	51435336	0.557542	0.557617	PANCAN	3p	amp	tel	n	1	n	0.95	46644268	52129042	0.503342	0.565476	0.233785	0	inf	0	16	3.74056	161
3	p21.2	DCAF1	NM_001171904	51433297	51534018	0.557594	0.558735	PANCAN	3p	amp	tel	n	1	n	0.95	46644268	52129042	0.503342	0.565476	0.233785	0	inf	0	16	3.74056	161
3	p21.2	RAD54L2	NM_001322256	51572698	51702676	0.559173	0.560646	PANCAN	3p	amp	tel	n	1	n	0.95	46644268	52129042	0.503342	0.565476	0.233785	0	inf	0	16	3.74056	161
3	p21.2	TEX264	NM_015926	51705190	51738339	0.560674	0.56105	PANCAN	3p	amp	tel	n	1	n	0.95	46644268	52129042	0.503342	0.565476	0.233785	0	inf	0	16	3.74056	161
3	p21.2	GRM2	NM_001349117	51741048	51752625	0.56108	0.561212	PANCAN	3p	amp	tel	n	1	n	0.95	46644268	52129042	0.503342	0.565476	0.233785	0	inf	0	16	3.74056	161
3	p21.2	IQCF6	NM_001143833	51812576	51813203	0.561891	0.561898	PANCAN	3p	amp	tel	n	1	n	0.95	46644268	52129042	0.503342	0.565476	0.233785	0	inf	0	16	3.74056	161
3	p21.2	IQCF4	NR_038213	51851618	51853651	0.562333	0.562356	PANCAN	3p	amp	tel	n	1	n	0.95	46644268	52129042	0.503342	0.565476	0.233785	0	inf	0	16	3.74056	161
3	p21.2	IQCF3	NM_001207023	51860898	51864874	0.562438	0.562483	PANCAN	3p	amp	tel	n	1	n	0.95	46644268	52129042	0.503342	0.565476	0.233785	0	inf	0	16	3.74056	161
3	p21.2	IQCF2	NM_203424	51895644	51897440	0.562832	0.562852	PANCAN	3p	amp	tel	n	1	n	0.95	46644268	52129042	0.503342	0.565476	0.233785	0	inf	0	16	3.74056	161
3	p21.2	IQCF5-AS1	NR_109984	51907611	51909783	0.562967	0.562992	PANCAN	3p	amp	tel	n	1	n	0.95	46644268	52129042	0.503342	0.565476	0.233785	0	inf	0	16	3.74056	161
3	p21.2	IQCF5	NM_001145059	51907736	51909600	0.562969	0.56299	PANCAN	3p	amp	tel	n	1	n	0.95	46644268	52129042	0.503342	0.565476	0.233785	0	inf	0	16	3.74056	161
3	p21.2	IQCF1	NM_152397	51928891	51937386	0.563208	0.563305	PANCAN	3p	amp	tel	n	1	n	0.95	46644268	52129042	0.503342	0.565476	0.233785	0	inf	0	16	3.74056	161
3	p21.2	RRP9	NM_004704	51967441	51975957	0.563645	0.563742	PANCAN	3p	amp	tel	n	1	n	0.95	46644268	52129042	0.503342	0.565476	0.233785	0	inf	0	16	3.74056	161
3	p21.2	PARP3	NM_005485	51976320	51982883	0.563746	0.56382	PANCAN	3p	amp	tel	n	1	n	0.95	46644268	52129042	0.503342	0.565476	0.233785	0	inf	0	16	3.74056	161
3	p21.2	GPR62	NM_080865	51989329	51991520	0.563893	0.563918	PANCAN	3p	amp	tel	n	1	n	0.95	46644268	52129042	0.503342	0.565476	0.233785	0	inf	0	16	3.74056	161
3	p21.2	PCBP4	NM_001174100	51991469	52001482	0.563917	0.564031	PANCAN	3p	amp	tel	n	1	n	0.95	46644268	52129042	0.503342	0.565476	0.233785	0	inf	0	16	3.74056	161
3	p21.2	ABHD14B	NM_001254753	52002525	52008646	0.564043	0.564112	PANCAN	3p	amp	tel	n	1	n	0.95	46644268	52129042	0.503342	0.565476	0.233785	0	inf	0	16	3.74056	161
3	p21.2	ABHD14A	NM_015407	52009041	52015216	0.564116	0.564186	PANCAN	3p	amp	tel	n	1	n	0.95	46644268	52129042	0.503342	0.565476	0.233785	0	inf	0	16	3.74056	161
3	p21.2	ABHD14A-ACY1	NM_001316331	52009041	52023218	0.564116	0.564277	PANCAN	3p	amp	tel	n	1	n	0.95	46644268	52129042	0.503342	0.565476	0.233785	0	inf	0	16	3.74056	161
3	p21.2	ACY1	NM_001198895	52017299	52023218	0.56421	0.564277	PANCAN	3p	amp	tel	n	1	n	0.95	46644268	52129042	0.503342	0.565476	0.233785	0	inf	0	16	3.74056	161
3	p21.2	RPL29	NM_000992	52027643	52029958	0.564327	0.564353	PANCAN	3p	amp	tel	n	1	n	0.95	46644268	52129042	0.503342	0.565476	0.233785	0	inf	0	16	3.74056	161
3	p21.2	DUSP7	NM_001947	52082936	52090461	0.564954	0.565039	PANCAN	3p	amp	tel	n	1	n	0.95	46644268	52129042	0.503342	0.565476	0.233785	0	inf	0	16	3.74056	161
3	p21.2	LINC00696	NR_027331	52096109	52099128	0.565103	0.565137	PANCAN	3p	amp	tel	n	1	n	0.95	46644268	52129042	0.503342	0.565476	0.233785	0	inf	0	16	3.74056	161
3	p21.2	POC1A	NM_001161581	52109248	52188706	0.565252	0.566152	PANCAN	3p	amp	tel	n	1	n	0.95	46644268	52129042	0.503342	0.565476	0.233785	0	inf	0	16	3.74056	161
5	q11.2	MAP3K1	NM_005921	56110899	56191978	0.954037	0.953414	PANCAN	5q	del	tel	p	2	p-rp	0.95	55926493	56463157	0.951332	0.955453	0.232994	0	inf	0	16	3.7279	3
5	q11.2	SETD9	NM_001171990	56205086	56224726	0.953314	0.953163	PANCAN	5q	del	tel	p	2	p-rp	0.95	55926493	56463157	0.951332	0.955453	0.232994	0	inf	0	16	3.7279	3
5	q11.2	MIER3	NM_001297599	56215428	56247957	0.953234	0.952984	PANCAN	5q	del	tel	p	2	p-rp	0.95	55926493	56463157	0.951332	0.955453	0.232994	0	inf	0	16	3.7279	3
19	q13.32	ARHGAP35	NM_004491	47421932	47508333	0.373928	0.371108	PANCAN	19q	del	tel	p	2	n-lp	0.95	47446561	48104221	0.351658	0.373124	0.227225	0	inf	0	16	3.63559	19
19	q13.32	NPAS1	NM_002517	47523100	47549033	0.370626	0.369779	PANCAN	19q	del	tel	p	2	n-lp	0.95	47446561	48104221	0.351658	0.373124	0.227225	0	inf	0	16	3.63559	19
19	q13.32	TMEM160	NM_017854	47549166	47551882	0.369775	0.369686	PANCAN	19q	del	tel	p	2	n-lp	0.95	47446561	48104221	0.351658	0.373124	0.227225	0	inf	0	16	3.63559	19
19	q13.32	ZC3H4	NM_015168	47567446	47617009	0.369178	0.36756	PANCAN	19q	del	tel	p	2	n-lp	0.95	47446561	48104221	0.351658	0.373124	0.227225	0	inf	0	16	3.63559	19
19	q13.32	SAE1	NM_005500	47634079	47713893	0.367003	0.364398	PANCAN	19q	del	tel	p	2	n-lp	0.95	47446561	48104221	0.351658	0.373124	0.227225	0	inf	0	16	3.63559	19
19	q13.32	BBC3	NM_001127242	47724078	47736023	0.364066	0.363676	PANCAN	19q	del	tel	p	2	n-lp	0.95	47446561	48104221	0.351658	0.373124	0.227225	0	inf	0	16	3.63559	19
19	q13.32	MIR3190	NR_036158	47730198	47730278	0.363866	0.363863	PANCAN	19q	del	tel	p	2	n-lp	0.95	47446561	48104221	0.351658	0.373124	0.227225	0	inf	0	16	3.63559	19
19	q13.32	MIR3191	NR_036159	47730200	47730276	0.363866	0.363863	PANCAN	19q	del	tel	p	2	n-lp	0.95	47446561	48104221	0.351658	0.373124	0.227225	0	inf	0	16	3.63559	19
19	q13.32	CCDC9	NM_015603	47759730	47775210	0.362902	0.362397	PANCAN	19q	del	tel	p	2	n-lp	0.95	47446561	48104221	0.351658	0.373124	0.227225	0	inf	0	16	3.63559	19
19	q13.32	INAFM1	NR_037675	47777658	47778980	0.362317	0.362274	PANCAN	19q	del	tel	p	2	n-lp	0.95	47446561	48104221	0.351658	0.373124	0.227225	0	inf	0	16	3.63559	19
19	q13.32	C5AR1	NM_001736	47813103	47825327	0.36116	0.360761	PANCAN	19q	del	tel	p	2	n-lp	0.95	47446561	48104221	0.351658	0.373124	0.227225	0	inf	0	16	3.63559	19
19	q13.32	C5AR2	NM_001271749	47835403	47845272	0.360432	0.36011	PANCAN	19q	del	tel	p	2	n-lp	0.95	47446561	48104221	0.351658	0.373124	0.227225	0	inf	0	16	3.63559	19
19	q13.32	DHX34	NM_014681	47852537	47885961	0.359873	0.358782	PANCAN	19q	del	tel	p	2	n-lp	0.95	47446561	48104221	0.351658	0.373124	0.227225	0	inf	0	16	3.63559	19
19	q13.32	MEIS3	NM_001346148	47906374	47925490	0.358116	0.357492	PANCAN	19q	del	tel	p	2	n-lp	0.95	47446561	48104221	0.351658	0.373124	0.227225	0	inf	0	16	3.63559	19
19	q13.32	SLC8A2	NM_015063	47931278	47975307	0.357303	0.355866	PANCAN	19q	del	tel	p	2	n-lp	0.95	47446561	48104221	0.351658	0.373124	0.227225	0	inf	0	16	3.63559	19
19	q13.32	KPTN	NR_111923	47978397	47987521	0.355765	0.355467	PANCAN	19q	del	tel	p	2	n-lp	0.95	47446561	48104221	0.351658	0.373124	0.227225	0	inf	0	16	3.63559	19
19	q13.32	NAPA-AS1	NR_038452	47987538	48004854	0.355467	0.354901	PANCAN	19q	del	tel	p	2	n-lp	0.95	47446561	48104221	0.351658	0.373124	0.227225	0	inf	0	16	3.63559	19
19	q13.33	NAPA	NR_038456	47990890	48018515	0.355357	0.354455	PANCAN	19q	del	tel	p	2	n-lp	0.95	47446561	48104221	0.351658	0.373124	0.227225	0	inf	0	16	3.63559	19
19	q13.33	ZNF541	NM_001277075	48023941	48076369	0.354278	0.352567	PANCAN	19q	del	tel	p	2	n-lp	0.95	47446561	48104221	0.351658	0.373124	0.227225	0	inf	0	16	3.63559	19
6	p21.1	LINC01276	NR_120347	41470181	41487590	0.719956	0.720266	PANCAN	6p	del	tel	n	1	n	0.95	41439249	42958900	0.719405	0.746449	0.222038	0	inf	0	16	3.5526	34
6	p21.1	FOXP4-AS1	NR_126415	41491632	41516359	0.720337	0.720778	PANCAN	6p	del	tel	n	1	n	0.95	41439249	42958900	0.719405	0.746449	0.222038	0	inf	0	16	3.5526	34
6	p21.1	FOXP4	NM_138457	41514163	41570122	0.720738	0.721734	PANCAN	6p	del	tel	n	1	n	0.95	41439249	42958900	0.719405	0.746449	0.222038	0	inf	0	16	3.5526	34
6	p21.1	MIR4641	NR_039784	41566460	41566526	0.721669	0.72167	PANCAN	6p	del	tel	n	1	n	0.95	41439249	42958900	0.719405	0.746449	0.222038	0	inf	0	16	3.5526	34
6	p21.1	MDFI	NM_001300804	41604914	41621982	0.722353	0.722657	PANCAN	6p	del	tel	n	1	n	0.95	41439249	42958900	0.719405	0.746449	0.222038	0	inf	0	16	3.5526	34
6	p21.1	TFEB	NM_001167827	41651715	41703997	0.723186	0.724117	PANCAN	6p	del	tel	n	1	n	0.95	41439249	42958900	0.719405	0.746449	0.222038	0	inf	0	16	3.5526	34
6	p21.1	PGC	NM_002630	41704448	41715139	0.724125	0.724315	PANCAN	6p	del	tel	n	1	n	0.95	41439249	42958900	0.719405	0.746449	0.222038	0	inf	0	16	3.5526	34
6	p21.1	FRS3	NM_006653	41737913	41747643	0.72472	0.724893	PANCAN	6p	del	tel	n	1	n	0.95	41439249	42958900	0.719405	0.746449	0.222038	0	inf	0	16	3.5526	34
6	p21.1	PRICKLE4	NM_013397	41748499	41755110	0.724909	0.725026	PANCAN	6p	del	tel	n	1	n	0.95	41439249	42958900	0.719405	0.746449	0.222038	0	inf	0	16	3.5526	34
6	p21.1	TOMM6	NM_001134493	41755180	41757634	0.725028	0.725071	PANCAN	6p	del	tel	n	1	n	0.95	41439249	42958900	0.719405	0.746449	0.222038	0	inf	0	16	3.5526	34
6	p21.1	USP49	NM_018561	41765382	41863099	0.725209	0.726948	PANCAN	6p	del	tel	n	1	n	0.95	41439249	42958900	0.719405	0.746449	0.222038	0	inf	0	16	3.5526	34
6	p21.1	MED20	NR_131160	41873090	41888885	0.727126	0.727407	PANCAN	6p	del	tel	n	1	n	0.95	41439249	42958900	0.719405	0.746449	0.222038	0	inf	0	16	3.5526	34
6	p21.1	BYSL	NM_004053	41888964	41900784	0.727408	0.727619	PANCAN	6p	del	tel	n	1	n	0.95	41439249	42958900	0.719405	0.746449	0.222038	0	inf	0	16	3.5526	34
6	p21.1	CCND3	NM_001136017	41902670	42016632	0.727652	0.72968	PANCAN	6p	del	tel	n	1	n	0.95	41439249	42958900	0.719405	0.746449	0.222038	0	inf	0	16	3.5526	34
6	p21.1	TAF8	NM_138572	42018250	42048644	0.729709	0.73025	PANCAN	6p	del	tel	n	1	n	0.95	41439249	42958900	0.719405	0.746449	0.222038	0	inf	0	16	3.5526	34
6	p21.1	C6orf132	NM_001164446	42068856	42110715	0.73061	0.731355	PANCAN	6p	del	tel	n	1	n	0.95	41439249	42958900	0.719405	0.746449	0.222038	0	inf	0	16	3.5526	34
6	p21.1	GUCA1A	NM_001319062	42123114	42147821	0.731575	0.732015	PANCAN	6p	del	tel	n	1	n	0.95	41439249	42958900	0.719405	0.746449	0.222038	0	inf	0	16	3.5526	34
6	p21.1	GUCA1B	NM_002098	42151021	42162694	0.732072	0.73228	PANCAN	6p	del	tel	n	1	n	0.95	41439249	42958900	0.719405	0.746449	0.222038	0	inf	0	16	3.5526	34
6	p21.1	MRPS10	NM_018141	42174538	42185633	0.732491	0.732688	PANCAN	6p	del	tel	n	1	n	0.95	41439249	42958900	0.719405	0.746449	0.222038	0	inf	0	16	3.5526	34
6	p21.1	TRERF1	NM_001297573	42192670	42419789	0.732813	0.736855	PANCAN	6p	del	tel	n	1	n	0.95	41439249	42958900	0.719405	0.746449	0.222038	0	inf	0	16	3.5526	34
6	p21.1	UBR2	NM_015255	42531759	42661243	0.738848	0.741152	PANCAN	6p	del	tel	n	1	n	0.95	41439249	42958900	0.719405	0.746449	0.222038	0	inf	0	16	3.5526	34
6	p21.1	PRPH2	NM_000322	42664332	42690358	0.741207	0.74167	PANCAN	6p	del	tel	n	1	n	0.95	41439249	42958900	0.719405	0.746449	0.222038	0	inf	0	16	3.5526	34
6	p21.1	ATP6V0CP3	NR_037141	42695313	42695932	0.741758	0.741769	PANCAN	6p	del	tel	n	1	n	0.95	41439249	42958900	0.719405	0.746449	0.222038	0	inf	0	16	3.5526	34
6	p21.1	TBCC	NM_003192	42712233	42713884	0.742059	0.742089	PANCAN	6p	del	tel	n	1	n	0.95	41439249	42958900	0.719405	0.746449	0.222038	0	inf	0	16	3.5526	34
6	p21.1	BICRAL	NM_001318819	42714695	42836298	0.742103	0.744267	PANCAN	6p	del	tel	n	1	n	0.95	41439249	42958900	0.719405	0.746449	0.222038	0	inf	0	16	3.5526	34
6	p21.1	LOC401261	NR_134654	42751233	42759061	0.742753	0.742893	PANCAN	6p	del	tel	n	1	n	0.95	41439249	42958900	0.719405	0.746449	0.222038	0	inf	0	16	3.5526	34
6	p21.1	RPL7L1	NR_134562	42847353	42857634	0.744464	0.744647	PANCAN	6p	del	tel	n	1	n	0.95	41439249	42958900	0.719405	0.746449	0.222038	0	inf	0	16	3.5526	34
6	p21.1	C6orf226	NM_001008739	42858002	42858554	0.744653	0.744663	PANCAN	6p	del	tel	n	1	n	0.95	41439249	42958900	0.719405	0.746449	0.222038	0	inf	0	16	3.5526	34
6	p21.1	PTCRA	NM_138296	42883726	42893575	0.745111	0.745287	PANCAN	6p	del	tel	n	1	n	0.95	41439249	42958900	0.719405	0.746449	0.222038	0	inf	0	16	3.5526	34
6	p21.1	CNPY3	NR_134881	42895739	42907025	0.745325	0.745526	PANCAN	6p	del	tel	n	1	n	0.95	41439249	42958900	0.719405	0.746449	0.222038	0	inf	0	16	3.5526	34
6	p21.1	CNPY3-GNMT	NM_001318856	42896867	42931618	0.745345	0.745964	PANCAN	6p	del	tel	n	1	n	0.95	41439249	42958900	0.719405	0.746449	0.222038	0	inf	0	16	3.5526	34
6	p21.1	GNMT	NM_001318865	42928491	42931618	0.745908	0.745964	PANCAN	6p	del	tel	n	1	n	0.95	41439249	42958900	0.719405	0.746449	0.222038	0	inf	0	16	3.5526	34
6	p21.1	PEX6	NR_133009	42931610	42946981	0.745963	0.746237	PANCAN	6p	del	tel	n	1	n	0.95	41439249	42958900	0.719405	0.746449	0.222038	0	inf	0	16	3.5526	34
6	p21.1	PPP2R5D	NM_001270476	42952236	42980083	0.74633	0.746826	PANCAN	6p	del	tel	n	1	n	0.95	41439249	42958900	0.719405	0.746449	0.222038	0	inf	0	16	3.5526	34
9	q31.3	SVEP1	NM_153366	113127528	113342160	0.397873	0.394803	PANCAN	9q	del	tel	n	1	n	0.95	113185521	116570359	0.348619	0.397044	0.217966	0	inf	0	16	3.48746	40
9	q31.3	MUSK	NM_001166281	113431050	113563278	0.393531	0.391639	PANCAN	9q	del	tel	n	1	n	0.95	113185521	116570359	0.348619	0.397044	0.217966	0	inf	0	16	3.48746	40
9	q31.3	LPAR1	NM_001351399	113635531	113801539	0.390606	0.388231	PANCAN	9q	del	tel	n	1	n	0.95	113185521	116570359	0.348619	0.397044	0.217966	0	inf	0	16	3.48746	40
9	q31.3	MIR7702	NR_106989	114033435	114033494	0.384913	0.384912	PANCAN	9q	del	tel	n	1	n	0.95	113185521	116570359	0.348619	0.397044	0.217966	0	inf	0	16	3.48746	40
9	q31.3	OR2K2	NM_205859	114089762	114090713	0.384107	0.384094	PANCAN	9q	del	tel	n	1	n	0.95	113185521	116570359	0.348619	0.397044	0.217966	0	inf	0	16	3.48746	40
9	q31.3	KIAA0368	NM_001080398	114122972	114247025	0.383632	0.381857	PANCAN	9q	del	tel	n	1	n	0.95	113185521	116570359	0.348619	0.397044	0.217966	0	inf	0	16	3.48746	40
9	q31.3	ZNF483	NM_001007169	114287438	114340397	0.381279	0.380522	PANCAN	9q	del	tel	n	1	n	0.95	113185521	116570359	0.348619	0.397044	0.217966	0	inf	0	16	3.48746	40
9	q31.3	PTGR1	NM_001146109	114312001	114362135	0.380928	0.380211	PANCAN	9q	del	tel	n	1	n	0.95	113185521	116570359	0.348619	0.397044	0.217966	0	inf	0	16	3.48746	40
9	q31.3	LRRC37A5P	NR_034087	114365110	114375833	0.380168	0.380015	PANCAN	9q	del	tel	n	1	n	0.95	113185521	116570359	0.348619	0.397044	0.217966	0	inf	0	16	3.48746	40
9	q31.3	DNAJC25	NR_037148	114393631	114416631	0.37976	0.379431	PANCAN	9q	del	tel	n	1	n	0.95	113185521	116570359	0.348619	0.397044	0.217966	0	inf	0	16	3.48746	40
9	q31.3	DNAJC25-GNG10	NM_004125	114393631	114432526	0.37976	0.379204	PANCAN	9q	del	tel	n	1	n	0.95	113185521	116570359	0.348619	0.397044	0.217966	0	inf	0	16	3.48746	40
9	q31.3	GNG10	NM_001198664	114423850	114432526	0.379328	0.379204	PANCAN	9q	del	tel	n	1	n	0.95	113185521	116570359	0.348619	0.397044	0.217966	0	inf	0	16	3.48746	40
9	q31.3	C9orf84	NR_109816	114448798	114557288	0.378971	0.377419	PANCAN	9q	del	tel	n	1	n	0.95	113185521	116570359	0.348619	0.397044	0.217966	0	inf	0	16	3.48746	40
9	q31.3	UGCG	NM_003358	114659045	114697654	0.375963	0.375411	PANCAN	9q	del	tel	n	1	n	0.95	113185521	116570359	0.348619	0.397044	0.217966	0	inf	0	16	3.48746	40
9	q31.3	MIR4668	NR_039814	114694379	114694449	0.375458	0.375457	PANCAN	9q	del	tel	n	1	n	0.95	113185521	116570359	0.348619	0.397044	0.217966	0	inf	0	16	3.48746	40
9	q31.3	SUSD1	NM_022486	114803060	114937577	0.373903	0.371978	PANCAN	9q	del	tel	n	1	n	0.95	113185521	116570359	0.348619	0.397044	0.217966	0	inf	0	16	3.48746	40
9	q32	PTBP3	NM_001244897	114979994	115095944	0.371371	0.369713	PANCAN	9q	del	tel	n	1	n	0.95	113185521	116570359	0.348619	0.397044	0.217966	0	inf	0	16	3.48746	40
9	q32	HSDL2	NM_001195822	115142188	115234685	0.369051	0.367728	PANCAN	9q	del	tel	n	1	n	0.95	113185521	116570359	0.348619	0.397044	0.217966	0	inf	0	16	3.48746	40
9	q32	C9orf147	NM_001350649	115214082	115249467	0.368023	0.367516	PANCAN	9q	del	tel	n	1	n	0.95	113185521	116570359	0.348619	0.397044	0.217966	0	inf	0	16	3.48746	40
9	q32	KIAA1958	NM_001287038	115249247	115427591	0.367519	0.364968	PANCAN	9q	del	tel	n	1	n	0.95	113185521	116570359	0.348619	0.397044	0.217966	0	inf	0	16	3.48746	40
9	q32	INIP	NM_001329590	115446228	115480429	0.364701	0.364212	PANCAN	9q	del	tel	n	1	n	0.95	113185521	116570359	0.348619	0.397044	0.217966	0	inf	0	16	3.48746	40
9	q32	SNX30	NM_001012994	115513133	115637267	0.363744	0.361968	PANCAN	9q	del	tel	n	1	n	0.95	113185521	116570359	0.348619	0.397044	0.217966	0	inf	0	16	3.48746	40
9	q32	SLC46A2	NM_033051	115641199	115653193	0.361912	0.361741	PANCAN	9q	del	tel	n	1	n	0.95	113185521	116570359	0.348619	0.397044	0.217966	0	inf	0	16	3.48746	40
9	q32	ZNF883	NM_001101338	115759399	115774472	0.360221	0.360006	PANCAN	9q	del	tel	n	1	n	0.95	113185521	116570359	0.348619	0.397044	0.217966	0	inf	0	16	3.48746	40
9	q32	ZFP37	NM_001282515	115804094	115819071	0.359582	0.359367	PANCAN	9q	del	tel	n	1	n	0.95	113185521	116570359	0.348619	0.397044	0.217966	0	inf	0	16	3.48746	40
9	q32	FAM225B	NR_024376	115867002	115873957	0.358682	0.358582	PANCAN	9q	del	tel	n	1	n	0.95	113185521	116570359	0.348619	0.397044	0.217966	0	inf	0	16	3.48746	40
9	q32	FAM225A	NR_024366	115875175	115882126	0.358565	0.358465	PANCAN	9q	del	tel	n	1	n	0.95	113185521	116570359	0.348619	0.397044	0.217966	0	inf	0	16	3.48746	40
9	q32	SLC31A2	NM_001860	115913237	115926422	0.35802	0.357832	PANCAN	9q	del	tel	n	1	n	0.95	113185521	116570359	0.348619	0.397044	0.217966	0	inf	0	16	3.48746	40
9	q32	FKBP15	NM_015258	115927799	115983641	0.357812	0.357013	PANCAN	9q	del	tel	n	1	n	0.95	113185521	116570359	0.348619	0.397044	0.217966	0	inf	0	16	3.48746	40
9	q32	SLC31A1	NM_001859	115983807	116026772	0.357011	0.356396	PANCAN	9q	del	tel	n	1	n	0.95	113185521	116570359	0.348619	0.397044	0.217966	0	inf	0	16	3.48746	40
9	q32	CDC26	NM_139286	116029289	116037869	0.35636	0.356237	PANCAN	9q	del	tel	n	1	n	0.95	113185521	116570359	0.348619	0.397044	0.217966	0	inf	0	16	3.48746	40
9	q32	PRPF4	NM_001322266	116037913	116055185	0.356237	0.35599	PANCAN	9q	del	tel	n	1	n	0.95	113185521	116570359	0.348619	0.397044	0.217966	0	inf	0	16	3.48746	40
9	q32	RNF183	NM_145051	116059372	116061320	0.35593	0.355902	PANCAN	9q	del	tel	n	1	n	0.95	113185521	116570359	0.348619	0.397044	0.217966	0	inf	0	16	3.48746	40
9	q32	WDR31	NM_145241	116075501	116102620	0.355699	0.355311	PANCAN	9q	del	tel	n	1	n	0.95	113185521	116570359	0.348619	0.397044	0.217966	0	inf	0	16	3.48746	40
9	q32	BSPRY	NM_017688	116111811	116133513	0.355179	0.354869	PANCAN	9q	del	tel	n	1	n	0.95	113185521	116570359	0.348619	0.397044	0.217966	0	inf	0	16	3.48746	40
9	q32	HDHD3	NM_001304509	116135695	116139289	0.354838	0.354786	PANCAN	9q	del	tel	n	1	n	0.95	113185521	116570359	0.348619	0.397044	0.217966	0	inf	0	16	3.48746	40
9	q32	ALAD	NM_001003945	116148591	116163618	0.354653	0.354438	PANCAN	9q	del	tel	n	1	n	0.95	113185521	116570359	0.348619	0.397044	0.217966	0	inf	0	16	3.48746	40
9	q32	POLE3	NM_017443	116169517	116173029	0.354354	0.354304	PANCAN	9q	del	tel	n	1	n	0.95	113185521	116570359	0.348619	0.397044	0.217966	0	inf	0	16	3.48746	40
9	q32	C9orf43	NM_001278629	116172923	116191964	0.354305	0.354033	PANCAN	9q	del	tel	n	1	n	0.95	113185521	116570359	0.348619	0.397044	0.217966	0	inf	0	16	3.48746	40
9	q32	RGS3	NM_144488	116207008	116360023	0.353818	0.351628	PANCAN	9q	del	tel	n	1	n	0.95	113185521	116570359	0.348619	0.397044	0.217966	0	inf	0	16	3.48746	40
1	p36.11	FAM110D	NM_024869	26485510	26489119	0.198339	0.19837	PANCAN	1p	amp	tel	n	1	n	0.95	26478393	27903342	0.198278	0.210425	0.214193	0	inf	0	16	3.42709	40
1	p36.11	ZNF593	NM_015871	26496387	26497364	0.198432	0.19844	PANCAN	1p	amp	tel	n	1	n	0.95	26478393	27903342	0.198278	0.210425	0.214193	0	inf	0	16	3.42709	40
1	p36.11	CNKSR1	NM_001297648	26503980	26516376	0.198496	0.198602	PANCAN	1p	amp	tel	n	1	n	0.95	26478393	27903342	0.198278	0.210425	0.214193	0	inf	0	16	3.42709	40
1	p36.11	CATSPER4	NM_198137	26517118	26529033	0.198608	0.19871	PANCAN	1p	amp	tel	n	1	n	0.95	26478393	27903342	0.198278	0.210425	0.214193	0	inf	0	16	3.42709	40
1	p36.11	LOC101928303	NR_110698	26551810	26556331	0.198904	0.198943	PANCAN	1p	amp	tel	n	1	n	0.95	26478393	27903342	0.198278	0.210425	0.214193	0	inf	0	16	3.42709	40
1	p36.11	CEP85	NM_001319944	26560643	26605301	0.198979	0.19936	PANCAN	1p	amp	tel	n	1	n	0.95	26478393	27903342	0.198278	0.210425	0.214193	0	inf	0	16	3.42709	40
1	p36.11	SH3BGRL3	NM_031286	26606212	26608013	0.199368	0.199383	PANCAN	1p	amp	tel	n	1	n	0.95	26478393	27903342	0.198278	0.210425	0.214193	0	inf	0	16	3.42709	40
1	p36.11	UBXN11	NM_145345	26608772	26644756	0.19939	0.199696	PANCAN	1p	amp	tel	n	1	n	0.95	26478393	27903342	0.198278	0.210425	0.214193	0	inf	0	16	3.42709	40
1	p36.11	CD52	NM_001803	26644410	26647014	0.199694	0.199716	PANCAN	1p	amp	tel	n	1	n	0.95	26478393	27903342	0.198278	0.210425	0.214193	0	inf	0	16	3.42709	40
1	p36.11	CRYBG2	NM_001039775	26648349	26680621	0.199727	0.200002	PANCAN	1p	amp	tel	n	1	n	0.95	26478393	27903342	0.198278	0.210425	0.214193	0	inf	0	16	3.42709	40
1	p36.11	ZNF683	NM_001307925	26688124	26699285	0.200066	0.200161	PANCAN	1p	amp	tel	n	1	n	0.95	26478393	27903342	0.198278	0.210425	0.214193	0	inf	0	16	3.42709	40
1	p36.11	LIN28A	NM_024674	26737258	26756219	0.200485	0.200647	PANCAN	1p	amp	tel	n	1	n	0.95	26478393	27903342	0.198278	0.210425	0.214193	0	inf	0	16	3.42709	40
1	p36.11	DHDDS	NM_001243565	26758772	26797795	0.200668	0.201001	PANCAN	1p	amp	tel	n	1	n	0.95	26478393	27903342	0.198278	0.210425	0.214193	0	inf	0	16	3.42709	40
1	p36.11	LOC101928324	NR_125952	26789247	26794028	0.200928	0.200969	PANCAN	1p	amp	tel	n	1	n	0.95	26478393	27903342	0.198278	0.210425	0.214193	0	inf	0	16	3.42709	40
1	p36.11	HMGN2	NM_005517	26798901	26803133	0.201011	0.201047	PANCAN	1p	amp	tel	n	1	n	0.95	26478393	27903342	0.198278	0.210425	0.214193	0	inf	0	16	3.42709	40
1	p36.11	RPS6KA1	NM_002953	26856248	26901520	0.201499	0.201885	PANCAN	1p	amp	tel	n	1	n	0.95	26478393	27903342	0.198278	0.210425	0.214193	0	inf	0	16	3.42709	40
1	p36.11	MIR1976	NR_031740	26881032	26881084	0.201711	0.201711	PANCAN	1p	amp	tel	n	1	n	0.95	26478393	27903342	0.198278	0.210425	0.214193	0	inf	0	16	3.42709	40
1	p36.11	LOC101928728	NR_135804	27018400	27020622	0.202882	0.202901	PANCAN	1p	amp	tel	n	1	n	0.95	26478393	27903342	0.198278	0.210425	0.214193	0	inf	0	16	3.42709	40
1	p36.11	ARID1A	NM_006015	27022523	27108601	0.202917	0.203651	PANCAN	1p	amp	tel	n	1	n	0.95	26478393	27903342	0.198278	0.210425	0.214193	0	inf	0	16	3.42709	40
1	p36.11	PIGV	NM_017837	27114453	27124894	0.2037	0.203789	PANCAN	1p	amp	tel	n	1	n	0.95	26478393	27903342	0.198278	0.210425	0.214193	0	inf	0	16	3.42709	40
1	p36.11	ZDHHC18	NM_032283	27153200	27182211	0.204031	0.204278	PANCAN	1p	amp	tel	n	1	n	0.95	26478393	27903342	0.198278	0.210425	0.214193	0	inf	0	16	3.42709	40
1	p36.11	SFN	NM_006142	27189628	27190948	0.204341	0.204353	PANCAN	1p	amp	tel	n	1	n	0.95	26478393	27903342	0.198278	0.210425	0.214193	0	inf	0	16	3.42709	40
1	p36.11	GPN2	NM_018066	27205872	27216869	0.20448	0.204573	PANCAN	1p	amp	tel	n	1	n	0.95	26478393	27903342	0.198278	0.210425	0.214193	0	inf	0	16	3.42709	40
1	p36.11	GPATCH3	NM_022078	27216978	27226962	0.204574	0.20466	PANCAN	1p	amp	tel	n	1	n	0.95	26478393	27903342	0.198278	0.210425	0.214193	0	inf	0	16	3.42709	40
1	p36.11	NR0B2	NM_021969	27237974	27240567	0.204753	0.204775	PANCAN	1p	amp	tel	n	1	n	0.95	26478393	27903342	0.198278	0.210425	0.214193	0	inf	0	16	3.42709	40
1	p36.11	NUDC	NM_006600	27248212	27273362	0.204841	0.205055	PANCAN	1p	amp	tel	n	1	n	0.95	26478393	27903342	0.198278	0.210425	0.214193	0	inf	0	16	3.42709	40
1	p36.11	KDF1	NM_152365	27276046	27286901	0.205078	0.20517	PANCAN	1p	amp	tel	n	1	n	0.95	26478393	27903342	0.198278	0.210425	0.214193	0	inf	0	16	3.42709	40
1	p36.11	TRNP1	NM_001013642	27320194	27327377	0.205454	0.205516	PANCAN	1p	amp	tel	n	1	n	0.95	26478393	27903342	0.198278	0.210425	0.214193	0	inf	0	16	3.42709	40
1	p36.11	FAM46B	NM_052943	27331510	27339333	0.205551	0.205617	PANCAN	1p	amp	tel	n	1	n	0.95	26478393	27903342	0.198278	0.210425	0.214193	0	inf	0	16	3.42709	40
1	p36.11	SLC9A1	NM_003047	27425299	27481621	0.20635	0.20683	PANCAN	1p	amp	tel	n	1	n	0.95	26478393	27903342	0.198278	0.210425	0.214193	0	inf	0	16	3.42709	40
1	p36.11	WDTC1	NM_015023	27561006	27635124	0.207507	0.208139	PANCAN	1p	amp	tel	n	1	n	0.95	26478393	27903342	0.198278	0.210425	0.214193	0	inf	0	16	3.42709	40
1	p36.11	TMEM222	NR_037576	27648635	27662891	0.208254	0.208376	PANCAN	1p	amp	tel	n	1	n	0.95	26478393	27903342	0.198278	0.210425	0.214193	0	inf	0	16	3.42709	40
1	p36.11	ACTG1P20	NR_033926	27650364	27653016	0.208269	0.208291	PANCAN	1p	amp	tel	n	1	n	0.95	26478393	27903342	0.198278	0.210425	0.214193	0	inf	0	16	3.42709	40
1	p36.11	SYTL1	NM_032872	27668482	27680423	0.208423	0.208525	PANCAN	1p	amp	tel	n	1	n	0.95	26478393	27903342	0.198278	0.210425	0.214193	0	inf	0	16	3.42709	40
1	p36.11	MAP3K6	NM_004672	27681669	27693357	0.208536	0.208635	PANCAN	1p	amp	tel	n	1	n	0.95	26478393	27903342	0.198278	0.210425	0.214193	0	inf	0	16	3.42709	40
1	p36.11	FCN3	NM_003665	27695600	27701343	0.208654	0.208703	PANCAN	1p	amp	tel	n	1	n	0.95	26478393	27903342	0.198278	0.210425	0.214193	0	inf	0	16	3.42709	40
1	p36.11	CD164L2	NM_207397	27705665	27709823	0.20874	0.208776	PANCAN	1p	amp	tel	n	1	n	0.95	26478393	27903342	0.198278	0.210425	0.214193	0	inf	0	16	3.42709	40
1	p36.11	GPR3	NM_005281	27719147	27722317	0.208855	0.208882	PANCAN	1p	amp	tel	n	1	n	0.95	26478393	27903342	0.198278	0.210425	0.214193	0	inf	0	16	3.42709	40
1	p36.11	WASF2	NM_001201404	27730729	27816698	0.208954	0.209687	PANCAN	1p	amp	tel	n	1	n	0.95	26478393	27903342	0.198278	0.210425	0.214193	0	inf	0	16	3.42709	40
1	p36.11	AHDC1	NM_001029882	27860755	27930005	0.210062	0.210653	PANCAN	1p	amp	tel	n	1	n	0.95	26478393	27903342	0.198278	0.210425	0.214193	0	inf	0	16	3.42709	40
19	p13.3	CACTIN	NM_001080543	3610626	3626813	0.139956	0.140637	PANCAN	19p	amp	tel	n	1	n	0.95	3626786	4271622	0.140636	0.167765	0.270708	1.22125e-15	14.9132	4.67496e-13	12.3302	3.3379	22
19	p13.3	PIP5K1C	NM_012398	3630178	3700477	0.140779	0.143736	PANCAN	19p	amp	tel	n	1	n	0.95	3626786	4271622	0.140636	0.167765	0.270708	1.22125e-15	14.9132	4.67496e-13	12.3302	3.3379	22
19	p13.3	TJP3	NM_001267560	3708334	3750811	0.144067	0.145854	PANCAN	19p	amp	tel	n	1	n	0.95	3626786	4271622	0.140636	0.167765	0.270708	1.22125e-15	14.9132	4.67496e-13	12.3302	3.3379	22
19	p13.3	APBA3	NM_004886	3750770	3761673	0.145852	0.146311	PANCAN	19p	amp	tel	n	1	n	0.95	3626786	4271622	0.140636	0.167765	0.270708	1.22125e-15	14.9132	4.67496e-13	12.3302	3.3379	22
19	p13.3	MRPL54	NM_172251	3762664	3767563	0.146352	0.146559	PANCAN	19p	amp	tel	n	1	n	0.95	3626786	4271622	0.140636	0.167765	0.270708	1.22125e-15	14.9132	4.67496e-13	12.3302	3.3379	22
19	p13.3	RAX2	NM_032753	3769088	3772219	0.146623	0.146754	PANCAN	19p	amp	tel	n	1	n	0.95	3626786	4271622	0.140636	0.167765	0.270708	1.22125e-15	14.9132	4.67496e-13	12.3302	3.3379	22
19	p13.3	MATK	NM_002378	3777966	3801810	0.146996	0.147999	PANCAN	19p	amp	tel	n	1	n	0.95	3626786	4271622	0.140636	0.167765	0.270708	1.22125e-15	14.9132	4.67496e-13	12.3302	3.3379	22
19	p13.3	ZFR2	NM_015174	3804021	3869027	0.148092	0.150827	PANCAN	19p	amp	tel	n	1	n	0.95	3626786	4271622	0.140636	0.167765	0.270708	1.22125e-15	14.9132	4.67496e-13	12.3302	3.3379	22
19	p13.3	ATCAY	NM_033064	3880617	3928080	0.151315	0.153312	PANCAN	19p	amp	tel	n	1	n	0.95	3626786	4271622	0.140636	0.167765	0.270708	1.22125e-15	14.9132	4.67496e-13	12.3302	3.3379	22
19	p13.3	NMRK2	NM_001289117	3933100	3942414	0.153523	0.153915	PANCAN	19p	amp	tel	n	1	n	0.95	3626786	4271622	0.140636	0.167765	0.270708	1.22125e-15	14.9132	4.67496e-13	12.3302	3.3379	22
19	p13.3	DAPK3	NM_001348	3958450	3971121	0.154589	0.155123	PANCAN	19p	amp	tel	n	1	n	0.95	3626786	4271622	0.140636	0.167765	0.270708	1.22125e-15	14.9132	4.67496e-13	12.3302	3.3379	22
19	p13.3	MIR637	NR_030367	3961411	3961510	0.154714	0.154718	PANCAN	19p	amp	tel	n	1	n	0.95	3626786	4271622	0.140636	0.167765	0.270708	1.22125e-15	14.9132	4.67496e-13	12.3302	3.3379	22
19	p13.3	EEF2	NM_001961	3976053	3985461	0.15533	0.155726	PANCAN	19p	amp	tel	n	1	n	0.95	3626786	4271622	0.140636	0.167765	0.270708	1.22125e-15	14.9132	4.67496e-13	12.3302	3.3379	22
19	p13.3	SNORD37	NR_002602	3982504	3982570	0.155601	0.155604	PANCAN	19p	amp	tel	n	1	n	0.95	3626786	4271622	0.140636	0.167765	0.270708	1.22125e-15	14.9132	4.67496e-13	12.3302	3.3379	22
19	p13.3	PIAS4	NM_015897	4007595	4039384	0.156657	0.157994	PANCAN	19p	amp	tel	n	1	n	0.95	3626786	4271622	0.140636	0.167765	0.270708	1.22125e-15	14.9132	4.67496e-13	12.3302	3.3379	22
19	p13.3	ZBTB7A	NM_015898	4043301	4066943	0.158159	0.159154	PANCAN	19p	amp	tel	n	1	n	0.95	3626786	4271622	0.140636	0.167765	0.270708	1.22125e-15	14.9132	4.67496e-13	12.3302	3.3379	22
19	p13.3	MAP2K2	NM_030662	4090319	4124126	0.160137	0.16156	PANCAN	19p	amp	tel	n	1	n	0.95	3626786	4271622	0.140636	0.167765	0.270708	1.22125e-15	14.9132	4.67496e-13	12.3302	3.3379	22
19	p13.3	CREB3L3	NM_001271996	4153597	4173051	0.1628	0.163618	PANCAN	19p	amp	tel	n	1	n	0.95	3626786	4271622	0.140636	0.167765	0.270708	1.22125e-15	14.9132	4.67496e-13	12.3302	3.3379	22
19	p13.3	SIRT6	NM_016539	4174105	4182601	0.163662	0.16402	PANCAN	19p	amp	tel	n	1	n	0.95	3626786	4271622	0.140636	0.167765	0.270708	1.22125e-15	14.9132	4.67496e-13	12.3302	3.3379	22
19	p13.3	ANKRD24	NM_133475	4183350	4224811	0.164051	0.165796	PANCAN	19p	amp	tel	n	1	n	0.95	3626786	4271622	0.140636	0.167765	0.270708	1.22125e-15	14.9132	4.67496e-13	12.3302	3.3379	22
19	p13.3	EBI3	NM_005755	4229539	4237524	0.165995	0.166331	PANCAN	19p	amp	tel	n	1	n	0.95	3626786	4271622	0.140636	0.167765	0.270708	1.22125e-15	14.9132	4.67496e-13	12.3302	3.3379	22
19	p13.3	CCDC94	NM_018074	4247066	4269090	0.166732	0.167659	PANCAN	19p	amp	tel	n	1	n	0.95	3626786	4271622	0.140636	0.167765	0.270708	1.22125e-15	14.9132	4.67496e-13	12.3302	3.3379	22
14	q21.3	LINC01599	NR_131171	50474030	50571761	0.649388	0.648245	PANCAN	14	del	tel	n	2	p-rn	0.95	50566072	59830511	0.539938	0.648311	0.207121	0	inf	0	16	3.31394	80
14	q21.3	VCPKMT	NR_049738	50575349	50583297	0.648203	0.64811	PANCAN	14	del	tel	n	2	p-rn	0.95	50566072	59830511	0.539938	0.648311	0.207121	0	inf	0	16	3.31394	80
14	q21.3	SOS2	NM_006939	50583838	50698411	0.648103	0.646763	PANCAN	14	del	tel	n	2	p-rn	0.95	50566072	59830511	0.539938	0.648311	0.207121	0	inf	0	16	3.31394	80
14	q21.3	L2HGDH	NM_024884	50709151	50778947	0.646637	0.645821	PANCAN	14	del	tel	n	2	p-rn	0.95	50566072	59830511	0.539938	0.648311	0.207121	0	inf	0	16	3.31394	80
14	q21.3	MIR4504	NR_039726	50766572	50766664	0.645966	0.645965	PANCAN	14	del	tel	n	2	p-rn	0.95	50566072	59830511	0.539938	0.648311	0.207121	0	inf	0	16	3.31394	80
14	q21.3	ATP5S	NR_033761	50779046	50792946	0.64582	0.645657	PANCAN	14	del	tel	n	2	p-rn	0.95	50566072	59830511	0.539938	0.648311	0.207121	0	inf	0	16	3.31394	80
14	q21.3	CDKL1	NM_004196	50796308	50862642	0.645618	0.644842	PANCAN	14	del	tel	n	2	p-rn	0.95	50566072	59830511	0.539938	0.648311	0.207121	0	inf	0	16	3.31394	80
14	q22.1	MAP4K5	NM_006575	50885210	50999376	0.644578	0.643243	PANCAN	14	del	tel	n	2	p-rn	0.95	50566072	59830511	0.539938	0.648311	0.207121	0	inf	0	16	3.31394	80
14	q22.1	ATL1	NM_001127713	50999799	51099784	0.643238	0.642068	PANCAN	14	del	tel	n	2	p-rn	0.95	50566072	59830511	0.539938	0.648311	0.207121	0	inf	0	16	3.31394	80
14	q22.1	SAV1	NM_021818	51100297	51135071	0.642062	0.641655	PANCAN	14	del	tel	n	2	p-rn	0.95	50566072	59830511	0.539938	0.648311	0.207121	0	inf	0	16	3.31394	80
14	q22.1	NIN	NM_020921	51186480	51297839	0.641054	0.639751	PANCAN	14	del	tel	n	2	p-rn	0.95	50566072	59830511	0.539938	0.648311	0.207121	0	inf	0	16	3.31394	80
14	q22.1	LOC105370489	NR_135258	51288514	51290226	0.63986	0.63984	PANCAN	14	del	tel	n	2	p-rn	0.95	50566072	59830511	0.539938	0.648311	0.207121	0	inf	0	16	3.31394	80
14	q22.1	ABHD12B	NM_001206673	51338877	51371688	0.639271	0.638887	PANCAN	14	del	tel	n	2	p-rn	0.95	50566072	59830511	0.539938	0.648311	0.207121	0	inf	0	16	3.31394	80
14	q22.1	PYGL	NM_002863	51371934	51411248	0.638884	0.638425	PANCAN	14	del	tel	n	2	p-rn	0.95	50566072	59830511	0.539938	0.648311	0.207121	0	inf	0	16	3.31394	80
14	q22.1	TRIM9	NM_015163	51441980	51562422	0.638065	0.636656	PANCAN	14	del	tel	n	2	p-rn	0.95	50566072	59830511	0.539938	0.648311	0.207121	0	inf	0	16	3.31394	80
14	q22.1	TMX1	NM_030755	51706885	51724372	0.634966	0.634762	PANCAN	14	del	tel	n	2	p-rn	0.95	50566072	59830511	0.539938	0.648311	0.207121	0	inf	0	16	3.31394	80
14	q22.1	LINC00519	NR_145423	51771028	51795103	0.634216	0.633934	PANCAN	14	del	tel	n	2	p-rn	0.95	50566072	59830511	0.539938	0.648311	0.207121	0	inf	0	16	3.31394	80
14	q22.1	LINC00640	NR_038358	51800110	51832275	0.633876	0.633499	PANCAN	14	del	tel	n	2	p-rn	0.95	50566072	59830511	0.539938	0.648311	0.207121	0	inf	0	16	3.31394	80
14	q22.1	LINC02310	NR_146549	51858846	51863853	0.633189	0.63313	PANCAN	14	del	tel	n	2	p-rn	0.95	50566072	59830511	0.539938	0.648311	0.207121	0	inf	0	16	3.31394	80
14	q22.1	FRMD6-AS2	NR_051990	51921229	52066670	0.632459	0.630758	PANCAN	14	del	tel	n	2	p-rn	0.95	50566072	59830511	0.539938	0.648311	0.207121	0	inf	0	16	3.31394	80
14	q22.1	FRMD6	NM_001042481	51955838	52197444	0.632054	0.629228	PANCAN	14	del	tel	n	2	p-rn	0.95	50566072	59830511	0.539938	0.648311	0.207121	0	inf	0	16	3.31394	80
14	q22.1	FRMD6-AS1	NR_037676	52116235	52118462	0.630178	0.630152	PANCAN	14	del	tel	n	2	p-rn	0.95	50566072	59830511	0.539938	0.648311	0.207121	0	inf	0	16	3.31394	80
14	q22.1	GNG2	NM_053064	52327021	52436518	0.627712	0.626431	PANCAN	14	del	tel	n	2	p-rn	0.95	50566072	59830511	0.539938	0.648311	0.207121	0	inf	0	16	3.31394	80
14	q22.1	LOC102723604	NR_126331	52382862	52385289	0.627059	0.62703	PANCAN	14	del	tel	n	2	p-rn	0.95	50566072	59830511	0.539938	0.648311	0.207121	0	inf	0	16	3.31394	80
14	q22.1	RTRAF	NM_016039	52456227	52471420	0.626201	0.626023	PANCAN	14	del	tel	n	2	p-rn	0.95	50566072	59830511	0.539938	0.648311	0.207121	0	inf	0	16	3.31394	80
14	q22.1	NID2	NM_007361	52471519	52535946	0.626022	0.625268	PANCAN	14	del	tel	n	2	p-rn	0.95	50566072	59830511	0.539938	0.648311	0.207121	0	inf	0	16	3.31394	80
14	q22.1	PTGDR	NM_001281469	52734430	52743442	0.622946	0.622841	PANCAN	14	del	tel	n	2	p-rn	0.95	50566072	59830511	0.539938	0.648311	0.207121	0	inf	0	16	3.31394	80
14	q22.1	PTGER2	NM_000956	52781015	52795322	0.622401	0.622234	PANCAN	14	del	tel	n	2	p-rn	0.95	50566072	59830511	0.539938	0.648311	0.207121	0	inf	0	16	3.31394	80
14	q22.1	TXNDC16	NM_001160047	52897307	53019301	0.621041	0.619614	PANCAN	14	del	tel	n	2	p-rn	0.95	50566072	59830511	0.539938	0.648311	0.207121	0	inf	0	16	3.31394	80
14	q22.1	GPR137C	NM_001099652	53019865	53104431	0.619607	0.618618	PANCAN	14	del	tel	n	2	p-rn	0.95	50566072	59830511	0.539938	0.648311	0.207121	0	inf	0	16	3.31394	80
14	q22.1	ERO1A	NM_014584	53106632	53162649	0.618592	0.617937	PANCAN	14	del	tel	n	2	p-rn	0.95	50566072	59830511	0.539938	0.648311	0.207121	0	inf	0	16	3.31394	80
14	q22.1	PSMC6	NM_002806	53173895	53194716	0.617806	0.617562	PANCAN	14	del	tel	n	2	p-rn	0.95	50566072	59830511	0.539938	0.648311	0.207121	0	inf	0	16	3.31394	80
14	q22.1	STYX	NM_001130701	53196882	53241705	0.617537	0.617012	PANCAN	14	del	tel	n	2	p-rn	0.95	50566072	59830511	0.539938	0.648311	0.207121	0	inf	0	16	3.31394	80
14	q22.1	GNPNAT1	NM_198066	53241910	53258386	0.61701	0.616817	PANCAN	14	del	tel	n	2	p-rn	0.95	50566072	59830511	0.539938	0.648311	0.207121	0	inf	0	16	3.31394	80
14	q22.1	FERMT2	NM_006832	53323988	53417815	0.61605	0.614952	PANCAN	14	del	tel	n	2	p-rn	0.95	50566072	59830511	0.539938	0.648311	0.207121	0	inf	0	16	3.31394	80
14	q22.1	DDHD1	NM_030637	53503457	53620046	0.61395	0.612587	PANCAN	14	del	tel	n	2	p-rn	0.95	50566072	59830511	0.539938	0.648311	0.207121	0	inf	0	16	3.31394	80
14	q22.1	LOC101927620	NR_110062	53620071	53624246	0.612586	0.612538	PANCAN	14	del	tel	n	2	p-rn	0.95	50566072	59830511	0.539938	0.648311	0.207121	0	inf	0	16	3.31394	80
14	q22.2	MIR5580	NR_049843	54415144	54415202	0.603286	0.603285	PANCAN	14	del	tel	n	2	p-rn	0.95	50566072	59830511	0.539938	0.648311	0.207121	0	inf	0	16	3.31394	80
14	q22.2	BMP4	NM_130850	54416454	54423609	0.60327	0.603187	PANCAN	14	del	tel	n	2	p-rn	0.95	50566072	59830511	0.539938	0.648311	0.207121	0	inf	0	16	3.31394	80
14	q22.2	CDKN3	NM_001330173	54863585	54886934	0.59804	0.597767	PANCAN	14	del	tel	n	2	p-rn	0.95	50566072	59830511	0.539938	0.648311	0.207121	0	inf	0	16	3.31394	80
14	q22.2	CNIH1	NM_005776	54893646	54908148	0.597688	0.597519	PANCAN	14	del	tel	n	2	p-rn	0.95	50566072	59830511	0.539938	0.648311	0.207121	0	inf	0	16	3.31394	80
14	q22.2	GMFB	NM_004124	54941208	54955744	0.597132	0.596962	PANCAN	14	del	tel	n	2	p-rn	0.95	50566072	59830511	0.539938	0.648311	0.207121	0	inf	0	16	3.31394	80
14	q22.2	CGRRF1	NM_006568	54976586	55005334	0.596718	0.596382	PANCAN	14	del	tel	n	2	p-rn	0.95	50566072	59830511	0.539938	0.648311	0.207121	0	inf	0	16	3.31394	80
14	q22.2	SAMD4A	NM_001161576	55034329	55260033	0.596043	0.593403	PANCAN	14	del	tel	n	2	p-rn	0.95	50566072	59830511	0.539938	0.648311	0.207121	0	inf	0	16	3.31394	80
14	q22.2	GCH1	NM_001024071	55308723	55369542	0.592833	0.592122	PANCAN	14	del	tel	n	2	p-rn	0.95	50566072	59830511	0.539938	0.648311	0.207121	0	inf	0	16	3.31394	80
14	q22.2	MIR4308	NR_036194	55344830	55344911	0.592411	0.59241	PANCAN	14	del	tel	n	2	p-rn	0.95	50566072	59830511	0.539938	0.648311	0.207121	0	inf	0	16	3.31394	80
14	q22.2	WDHD1	NM_007086	55405655	55493819	0.591699	0.590668	PANCAN	14	del	tel	n	2	p-rn	0.95	50566072	59830511	0.539938	0.648311	0.207121	0	inf	0	16	3.31394	80
14	q22.3	SOCS4	NM_199421	55493843	55516206	0.590667	0.590406	PANCAN	14	del	tel	n	2	p-rn	0.95	50566072	59830511	0.539938	0.648311	0.207121	0	inf	0	16	3.31394	80
14	q22.3	MAPK1IP1L	NM_144578	55518361	55536912	0.590381	0.590164	PANCAN	14	del	tel	n	2	p-rn	0.95	50566072	59830511	0.539938	0.648311	0.207121	0	inf	0	16	3.31394	80
14	q22.3	LGALS3	NM_001357678	55595934	55612148	0.589473	0.589284	PANCAN	14	del	tel	n	2	p-rn	0.95	50566072	59830511	0.539938	0.648311	0.207121	0	inf	0	16	3.31394	80
14	q22.3	DLGAP5	NM_001146015	55614833	55658396	0.589252	0.588743	PANCAN	14	del	tel	n	2	p-rn	0.95	50566072	59830511	0.539938	0.648311	0.207121	0	inf	0	16	3.31394	80
14	q22.3	FBXO34	NM_017943	55738020	55820329	0.587811	0.586848	PANCAN	14	del	tel	n	2	p-rn	0.95	50566072	59830511	0.539938	0.648311	0.207121	0	inf	0	16	3.31394	80
14	q22.3	ATG14	NM_014924	55833108	55878576	0.586699	0.586167	PANCAN	14	del	tel	n	2	p-rn	0.95	50566072	59830511	0.539938	0.648311	0.207121	0	inf	0	16	3.31394	80
14	q22.3	TBPL2	NM_199047	55880929	55907263	0.586139	0.585831	PANCAN	14	del	tel	n	2	p-rn	0.95	50566072	59830511	0.539938	0.648311	0.207121	0	inf	0	16	3.31394	80
14	q22.3	KTN1-AS1	NR_027123	56042874	56046810	0.584245	0.584199	PANCAN	14	del	tel	n	2	p-rn	0.95	50566072	59830511	0.539938	0.648311	0.207121	0	inf	0	16	3.31394	80
14	q22.3	KTN1	NR_073128	56046924	56151302	0.584198	0.582977	PANCAN	14	del	tel	n	2	p-rn	0.95	50566072	59830511	0.539938	0.648311	0.207121	0	inf	0	16	3.31394	80
14	q22.3	RPL13AP3	NR_004844	56232962	56234435	0.582021	0.582004	PANCAN	14	del	tel	n	2	p-rn	0.95	50566072	59830511	0.539938	0.648311	0.207121	0	inf	0	16	3.31394	80
14	q22.3	LINC00520	NR_026796	56247852	56263392	0.581847	0.581665	PANCAN	14	del	tel	n	2	p-rn	0.95	50566072	59830511	0.539938	0.648311	0.207121	0	inf	0	16	3.31394	80
14	q22.3	PELI2	NM_021255	56585092	56768031	0.577902	0.575762	PANCAN	14	del	tel	n	2	p-rn	0.95	50566072	59830511	0.539938	0.648311	0.207121	0	inf	0	16	3.31394	80
14	q22.3	LOC101927690	NR_135241	56981048	57018027	0.573271	0.572838	PANCAN	14	del	tel	n	2	p-rn	0.95	50566072	59830511	0.539938	0.648311	0.207121	0	inf	0	16	3.31394	80
14	q22.3	TMEM260	NM_017799	57046510	57116232	0.572505	0.571689	PANCAN	14	del	tel	n	2	p-rn	0.95	50566072	59830511	0.539938	0.648311	0.207121	0	inf	0	16	3.31394	80
14	q22.3	OTX2	NM_021728	57267424	57277194	0.569921	0.569806	PANCAN	14	del	tel	n	2	p-rn	0.95	50566072	59830511	0.539938	0.648311	0.207121	0	inf	0	16	3.31394	80
14	q22.3	OTX2-AS1	NR_029385	57279875	57398026	0.569775	0.568393	PANCAN	14	del	tel	n	2	p-rn	0.95	50566072	59830511	0.539938	0.648311	0.207121	0	inf	0	16	3.31394	80
14	q22.3	EXOC5	NM_006544	57669193	57735617	0.565221	0.564444	PANCAN	14	del	tel	n	2	p-rn	0.95	50566072	59830511	0.539938	0.648311	0.207121	0	inf	0	16	3.31394	80
14	q22.3	AP5M1	NR_026895	57735605	57756797	0.564444	0.564196	PANCAN	14	del	tel	n	2	p-rn	0.95	50566072	59830511	0.539938	0.648311	0.207121	0	inf	0	16	3.31394	80
14	q22.3	NAA30	NM_001011713	57857270	57879466	0.563021	0.562761	PANCAN	14	del	tel	n	2	p-rn	0.95	50566072	59830511	0.539938	0.648311	0.207121	0	inf	0	16	3.31394	80
14	q22.3	CCDC198	NM_018168	57936017	57960581	0.5621	0.561812	PANCAN	14	del	tel	n	2	p-rn	0.95	50566072	59830511	0.539938	0.648311	0.207121	0	inf	0	16	3.31394	80
14	q23.1	SLC35F4	NM_001206920	58030639	58332592	0.560993	0.557461	PANCAN	14	del	tel	n	2	p-rn	0.95	50566072	59830511	0.539938	0.648311	0.207121	0	inf	0	16	3.31394	80
14	q23.1	C14orf37	NM_001001872	58470773	58618957	0.555844	0.554111	PANCAN	14	del	tel	n	2	p-rn	0.95	50566072	59830511	0.539938	0.648311	0.207121	0	inf	0	16	3.31394	80
14	q23.1	ACTR10	NM_018477	58666832	58702353	0.553551	0.553135	PANCAN	14	del	tel	n	2	p-rn	0.95	50566072	59830511	0.539938	0.648311	0.207121	0	inf	0	16	3.31394	80
14	q23.1	PSMA3	NM_002788	58711522	58738727	0.553028	0.55271	PANCAN	14	del	tel	n	2	p-rn	0.95	50566072	59830511	0.539938	0.648311	0.207121	0	inf	0	16	3.31394	80
14	q23.1	PSMA3-AS1	NR_029434	58732082	58764855	0.552787	0.552404	PANCAN	14	del	tel	n	2	p-rn	0.95	50566072	59830511	0.539938	0.648311	0.207121	0	inf	0	16	3.31394	80
14	q23.1	LINC00216	NR_146595	58754750	58755870	0.552522	0.552509	PANCAN	14	del	tel	n	2	p-rn	0.95	50566072	59830511	0.539938	0.648311	0.207121	0	inf	0	16	3.31394	80
14	q23.1	ARID4A	NM_002892	58765221	58840451	0.5524	0.55152	PANCAN	14	del	tel	n	2	p-rn	0.95	50566072	59830511	0.539938	0.648311	0.207121	0	inf	0	16	3.31394	80
14	q23.1	TOMM20L	NM_207377	58862643	58875419	0.55126	0.551111	PANCAN	14	del	tel	n	2	p-rn	0.95	50566072	59830511	0.539938	0.648311	0.207121	0	inf	0	16	3.31394	80
14	q23.1	TIMM9	NM_001304485	58875211	58894332	0.551113	0.550889	PANCAN	14	del	tel	n	2	p-rn	0.95	50566072	59830511	0.539938	0.648311	0.207121	0	inf	0	16	3.31394	80
14	q23.1	KIAA0586	NM_001244190	58894102	59015549	0.550892	0.549471	PANCAN	14	del	tel	n	2	p-rn	0.95	50566072	59830511	0.539938	0.648311	0.207121	0	inf	0	16	3.31394	80
14	q23.1	DACT1	NR_046093	59100785	59115038	0.548474	0.548308	PANCAN	14	del	tel	n	2	p-rn	0.95	50566072	59830511	0.539938	0.648311	0.207121	0	inf	0	16	3.31394	80
14	q23.1	LINC01500	NR_110547	59295005	59484046	0.546202	0.543991	PANCAN	14	del	tel	n	2	p-rn	0.95	50566072	59830511	0.539938	0.648311	0.207121	0	inf	0	16	3.31394	80
14	q23.1	DAAM1	NM_001270520	59655380	59838123	0.541987	0.539849	PANCAN	14	del	tel	n	2	p-rn	0.95	50566072	59830511	0.539938	0.648311	0.207121	0	inf	0	16	3.31394	80
19	q11	LOC101927151	NR_146733	28284338	28515876	0.00143108	0.00898836	PANCAN	19q	amp	cent	p	1	p	0.95	28493000	37754420	0.0082417	0.31053	0.205739	0	inf	0	16	3.29183	157
19	q12	LOC100420587	NR_110759	28926295	29218601	0.0223842	0.0319249	PANCAN	19q	amp	cent	p	1	p	0.95	28493000	37754420	0.0082417	0.31053	0.205739	0	inf	0	16	3.29183	157
19	q12	LOC102724908	NR_135636	29097594	29106136	0.0279753	0.0282541	PANCAN	19q	amp	cent	p	1	p	0.95	28493000	37754420	0.0082417	0.31053	0.205739	0	inf	0	16	3.29183	157
19	q12	LINC00906	NR_027318	29456037	29460055	0.0396747	0.0398059	PANCAN	19q	amp	cent	p	1	p	0.95	28493000	37754420	0.0082417	0.31053	0.205739	0	inf	0	16	3.29183	157
19	q12	LOC102724958	NR_110760	29459374	29461579	0.0397837	0.0398556	PANCAN	19q	amp	cent	p	1	p	0.95	28493000	37754420	0.0082417	0.31053	0.205739	0	inf	0	16	3.29183	157
19	q12	LINC01532	NR_040036	29493461	29504862	0.0408962	0.0412684	PANCAN	19q	amp	cent	p	1	p	0.95	28493000	37754420	0.0082417	0.31053	0.205739	0	inf	0	16	3.29183	157
19	q12	UQCRFS1	NM_006003	29698166	29704136	0.0475777	0.0477726	PANCAN	19q	amp	cent	p	1	p	0.95	28493000	37754420	0.0082417	0.31053	0.205739	0	inf	0	16	3.29183	157
19	q12	LOC284395	NR_040029	29777917	30016659	0.0501807	0.0579732	PANCAN	19q	amp	cent	p	1	p	0.95	28493000	37754420	0.0082417	0.31053	0.205739	0	inf	0	16	3.29183	157
19	q12	VSTM2B	NM_001146339	30017490	30055226	0.0580003	0.059232	PANCAN	19q	amp	cent	p	1	p	0.95	28493000	37754420	0.0082417	0.31053	0.205739	0	inf	0	16	3.29183	157
19	q12	POP4	NR_027368	30097169	30108162	0.060601	0.0609598	PANCAN	19q	amp	cent	p	1	p	0.95	28493000	37754420	0.0082417	0.31053	0.205739	0	inf	0	16	3.29183	157
19	q12	PLEKHF1	NM_024310	30156326	30166383	0.0625318	0.0628601	PANCAN	19q	amp	cent	p	1	p	0.95	28493000	37754420	0.0082417	0.31053	0.205739	0	inf	0	16	3.29183	157
19	q12	C19orf12	NM_001256047	30189792	30206696	0.0636241	0.0641759	PANCAN	19q	amp	cent	p	1	p	0.95	28493000	37754420	0.0082417	0.31053	0.205739	0	inf	0	16	3.29183	157
19	q12	CCNE1	NM_001238	30302900	30315224	0.0673159	0.0677182	PANCAN	19q	amp	cent	p	1	p	0.95	28493000	37754420	0.0082417	0.31053	0.205739	0	inf	0	16	3.29183	157
19	q12	URI1	NM_001252641	30414550	30507519	0.0709601	0.0739946	PANCAN	19q	amp	cent	p	1	p	0.95	28493000	37754420	0.0082417	0.31053	0.205739	0	inf	0	16	3.29183	157
19	q12	ZNF536	NM_001352260	30863299	31204493	0.0856071	0.0967435	PANCAN	19q	amp	cent	p	1	p	0.95	28493000	37754420	0.0082417	0.31053	0.205739	0	inf	0	16	3.29183	157
19	q12	TSHZ3	NR_138036	31640775	31840431	0.110983	0.1175	PANCAN	19q	amp	cent	p	1	p	0.95	28493000	37754420	0.0082417	0.31053	0.205739	0	inf	0	16	3.29183	157
19	q12	LINC01791	NR_147209	31658415	31698569	0.111559	0.11287	PANCAN	19q	amp	cent	p	1	p	0.95	28493000	37754420	0.0082417	0.31053	0.205739	0	inf	0	16	3.29183	157
19	q12	THEG5	NM_001278575	32079094	32084687	0.12529	0.125473	PANCAN	19q	amp	cent	p	1	p	0.95	28493000	37754420	0.0082417	0.31053	0.205739	0	inf	0	16	3.29183	157
19	q13.11	LINC01533	NR_110675	32516767	32539805	0.139575	0.140327	PANCAN	19q	amp	cent	p	1	p	0.95	28493000	37754420	0.0082417	0.31053	0.205739	0	inf	0	16	3.29183	157
19	q13.11	LINC01782	NR_110694	32592997	32596822	0.142064	0.142188	PANCAN	19q	amp	cent	p	1	p	0.95	28493000	37754420	0.0082417	0.31053	0.205739	0	inf	0	16	3.29183	157
19	q13.11	ZNF507	NM_014910	32836513	32878573	0.150012	0.151385	PANCAN	19q	amp	cent	p	1	p	0.95	28493000	37754420	0.0082417	0.31053	0.205739	0	inf	0	16	3.29183	157
19	q13.11	LOC400684	NR_046201	32880955	32896445	0.151462	0.151968	PANCAN	19q	amp	cent	p	1	p	0.95	28493000	37754420	0.0082417	0.31053	0.205739	0	inf	0	16	3.29183	157
19	q13.11	DPY19L3	NM_001172774	32896654	32976799	0.151975	0.154591	PANCAN	19q	amp	cent	p	1	p	0.95	28493000	37754420	0.0082417	0.31053	0.205739	0	inf	0	16	3.29183	157
19	q13.11	PDCD5	NM_004708	33072093	33078358	0.157701	0.157905	PANCAN	19q	amp	cent	p	1	p	0.95	28493000	37754420	0.0082417	0.31053	0.205739	0	inf	0	16	3.29183	157
19	q13.11	ANKRD27	NM_032139	33087906	33166102	0.158217	0.160769	PANCAN	19q	amp	cent	p	1	p	0.95	28493000	37754420	0.0082417	0.31053	0.205739	0	inf	0	16	3.29183	157
19	q13.11	SNORA68B	NR_145718	33099242	33099375	0.158587	0.158591	PANCAN	19q	amp	cent	p	1	p	0.95	28493000	37754420	0.0082417	0.31053	0.205739	0	inf	0	16	3.29183	157
19	q13.11	RGS9BP	NM_207391	33166312	33169206	0.160776	0.160871	PANCAN	19q	amp	cent	p	1	p	0.95	28493000	37754420	0.0082417	0.31053	0.205739	0	inf	0	16	3.29183	157
19	q13.11	NUDT19	NM_001105570	33182866	33204702	0.161317	0.162029	PANCAN	19q	amp	cent	p	1	p	0.95	28493000	37754420	0.0082417	0.31053	0.205739	0	inf	0	16	3.29183	157
19	q13.11	TDRD12	NM_001110822	33210678	33281714	0.162224	0.164543	PANCAN	19q	amp	cent	p	1	p	0.95	28493000	37754420	0.0082417	0.31053	0.205739	0	inf	0	16	3.29183	157
19	q13.11	SLC7A9	NM_014270	33321418	33360683	0.165839	0.16712	PANCAN	19q	amp	cent	p	1	p	0.95	28493000	37754420	0.0082417	0.31053	0.205739	0	inf	0	16	3.29183	157
19	q13.11	CEP89	NM_032816	33369903	33462935	0.167421	0.170458	PANCAN	19q	amp	cent	p	1	p	0.95	28493000	37754420	0.0082417	0.31053	0.205739	0	inf	0	16	3.29183	157
19	q13.11	FAAP24	NM_001300978	33463122	33468401	0.170464	0.170636	PANCAN	19q	amp	cent	p	1	p	0.95	28493000	37754420	0.0082417	0.31053	0.205739	0	inf	0	16	3.29183	157
19	q13.11	RHPN2	NM_033103	33469497	33555824	0.170672	0.17349	PANCAN	19q	amp	cent	p	1	p	0.95	28493000	37754420	0.0082417	0.31053	0.205739	0	inf	0	16	3.29183	157
19	q13.11	GPATCH1	NM_018025	33571785	33621318	0.174011	0.175627	PANCAN	19q	amp	cent	p	1	p	0.95	28493000	37754420	0.0082417	0.31053	0.205739	0	inf	0	16	3.29183	157
19	q13.11	WDR88	NM_173479	33622997	33666703	0.175682	0.177109	PANCAN	19q	amp	cent	p	1	p	0.95	28493000	37754420	0.0082417	0.31053	0.205739	0	inf	0	16	3.29183	157
19	q13.11	LRP3	NM_002333	33685598	33699773	0.177725	0.178188	PANCAN	19q	amp	cent	p	1	p	0.95	28493000	37754420	0.0082417	0.31053	0.205739	0	inf	0	16	3.29183	157
19	q13.11	SLC7A10	NM_019849	33699569	33716756	0.178181	0.178742	PANCAN	19q	amp	cent	p	1	p	0.95	28493000	37754420	0.0082417	0.31053	0.205739	0	inf	0	16	3.29183	157
19	q13.11	CEBPA	NM_004364	33790839	33793470	0.18116	0.181246	PANCAN	19q	amp	cent	p	1	p	0.95	28493000	37754420	0.0082417	0.31053	0.205739	0	inf	0	16	3.29183	157
19	q13.11	CEBPA-AS1	NR_026887	33793726	33795963	0.181255	0.181328	PANCAN	19q	amp	cent	p	1	p	0.95	28493000	37754420	0.0082417	0.31053	0.205739	0	inf	0	16	3.29183	157
19	q13.11	CEBPG	NM_001806	33864574	33873592	0.183567	0.183861	PANCAN	19q	amp	cent	p	1	p	0.95	28493000	37754420	0.0082417	0.31053	0.205739	0	inf	0	16	3.29183	157
19	q13.11	PEPD	NM_000285	33877854	34012799	0.184001	0.188405	PANCAN	19q	amp	cent	p	1	p	0.95	28493000	37754420	0.0082417	0.31053	0.205739	0	inf	0	16	3.29183	157
19	q13.11	CHST8	NM_001127895	34112860	34264414	0.191671	0.196618	PANCAN	19q	amp	cent	p	1	p	0.95	28493000	37754420	0.0082417	0.31053	0.205739	0	inf	0	16	3.29183	157
19	q13.11	KCTD15	NM_001129994	34287750	34306666	0.197379	0.197997	PANCAN	19q	amp	cent	p	1	p	0.95	28493000	37754420	0.0082417	0.31053	0.205739	0	inf	0	16	3.29183	157
19	q13.11	LSM14A	NM_001114093	34663351	34720420	0.209639	0.211502	PANCAN	19q	amp	cent	p	1	p	0.95	28493000	37754420	0.0082417	0.31053	0.205739	0	inf	0	16	3.29183	157
19	q13.11	KIAA0355	NM_014686	34745455	34846471	0.212319	0.215616	PANCAN	19q	amp	cent	p	1	p	0.95	28493000	37754420	0.0082417	0.31053	0.205739	0	inf	0	16	3.29183	157
19	q13.11	GPI	NM_001289789	34855644	34893318	0.215915	0.217145	PANCAN	19q	amp	cent	p	1	p	0.95	28493000	37754420	0.0082417	0.31053	0.205739	0	inf	0	16	3.29183	157
19	q13.11	PDCD2L	NM_001353433	34895302	34917072	0.21721	0.21792	PANCAN	19q	amp	cent	p	1	p	0.95	28493000	37754420	0.0082417	0.31053	0.205739	0	inf	0	16	3.29183	157
19	q13.11	UBA2	NM_005499	34919267	34960798	0.217992	0.219347	PANCAN	19q	amp	cent	p	1	p	0.95	28493000	37754420	0.0082417	0.31053	0.205739	0	inf	0	16	3.29183	157
19	q13.11	WTIP	NM_001080436	34972879	34992085	0.219742	0.220369	PANCAN	19q	amp	cent	p	1	p	0.95	28493000	37754420	0.0082417	0.31053	0.205739	0	inf	0	16	3.29183	157
19	q13.11	ZNF807	NR_146880	35032620	35036291	0.221692	0.221811	PANCAN	19q	amp	cent	p	1	p	0.95	28493000	37754420	0.0082417	0.31053	0.205739	0	inf	0	16	3.29183	157
19	q13.11	SCGB1B2P	NR_027620	35067637	35167936	0.222835	0.226108	PANCAN	19q	amp	cent	p	1	p	0.95	28493000	37754420	0.0082417	0.31053	0.205739	0	inf	0	16	3.29183	157
19	q13.11	SCGB2B2	NM_001025591	35081529	35085490	0.223288	0.223417	PANCAN	19q	amp	cent	p	1	p	0.95	28493000	37754420	0.0082417	0.31053	0.205739	0	inf	0	16	3.29183	157
19	q13.11	SCGB2B3P	NR_045208	35136777	35136957	0.225091	0.225097	PANCAN	19q	amp	cent	p	1	p	0.95	28493000	37754420	0.0082417	0.31053	0.205739	0	inf	0	16	3.29183	157
19	q13.11	ZNF302	NM_018675	35168543	35177302	0.226128	0.226414	PANCAN	19q	amp	cent	p	1	p	0.95	28493000	37754420	0.0082417	0.31053	0.205739	0	inf	0	16	3.29183	157
19	q13.11	ZNF181	NM_001145665	35225479	35233774	0.227986	0.228257	PANCAN	19q	amp	cent	p	1	p	0.95	28493000	37754420	0.0082417	0.31053	0.205739	0	inf	0	16	3.29183	157
19	q13.11	ZNF599	NM_001007248	35248978	35264134	0.228753	0.229248	PANCAN	19q	amp	cent	p	1	p	0.95	28493000	37754420	0.0082417	0.31053	0.205739	0	inf	0	16	3.29183	157
19	q13.11	LINC01801	NR_033982	35307057	35323773	0.230649	0.231195	PANCAN	19q	amp	cent	p	1	p	0.95	28493000	37754420	0.0082417	0.31053	0.205739	0	inf	0	16	3.29183	157
19	q13.11	LINC00904	NR_046222	35382932	35389847	0.233126	0.233351	PANCAN	19q	amp	cent	p	1	p	0.95	28493000	37754420	0.0082417	0.31053	0.205739	0	inf	0	16	3.29183	157
19	q13.11	LINC01838	NR_146451	35396218	35399094	0.233559	0.233653	PANCAN	19q	amp	cent	p	1	p	0.95	28493000	37754420	0.0082417	0.31053	0.205739	0	inf	0	16	3.29183	157
19	q13.11	ZNF30-AS1	NR_110749	35413918	35417730	0.234137	0.234261	PANCAN	19q	amp	cent	p	1	p	0.95	28493000	37754420	0.0082417	0.31053	0.205739	0	inf	0	16	3.29183	157
19	q13.11	ZNF30	NM_194325	35417806	35436076	0.234264	0.23486	PANCAN	19q	amp	cent	p	1	p	0.95	28493000	37754420	0.0082417	0.31053	0.205739	0	inf	0	16	3.29183	157
19	q13.11	ZNF792	NM_175872	35447257	35454953	0.235225	0.235476	PANCAN	19q	amp	cent	p	1	p	0.95	28493000	37754420	0.0082417	0.31053	0.205739	0	inf	0	16	3.29183	157
19	q13.12	GRAMD1A	NM_001320036	35485687	35517375	0.236479	0.237514	PANCAN	19q	amp	cent	p	1	p	0.95	28493000	37754420	0.0082417	0.31053	0.205739	0	inf	0	16	3.29183	157
19	q13.12	SCN1B	NM_001037	35521591	35531353	0.237651	0.23797	PANCAN	19q	amp	cent	p	1	p	0.95	28493000	37754420	0.0082417	0.31053	0.205739	0	inf	0	16	3.29183	157
19	q13.12	HPN	NM_002151	35531409	35557477	0.237972	0.238823	PANCAN	19q	amp	cent	p	1	p	0.95	28493000	37754420	0.0082417	0.31053	0.205739	0	inf	0	16	3.29183	157
19	q13.12	HPN-AS1	NR_024562	35549962	35597208	0.238577	0.240119	PANCAN	19q	amp	cent	p	1	p	0.95	28493000	37754420	0.0082417	0.31053	0.205739	0	inf	0	16	3.29183	157
19	q13.12	FXYD3	NM_001136011	35606731	35615228	0.24043	0.240708	PANCAN	19q	amp	cent	p	1	p	0.95	28493000	37754420	0.0082417	0.31053	0.205739	0	inf	0	16	3.29183	157
19	q13.12	MIR6887	NR_106947	35613603	35613668	0.240655	0.240657	PANCAN	19q	amp	cent	p	1	p	0.95	28493000	37754420	0.0082417	0.31053	0.205739	0	inf	0	16	3.29183	157
19	q13.12	LGI4	NM_139284	35615416	35626178	0.240714	0.241065	PANCAN	19q	amp	cent	p	1	p	0.95	28493000	37754420	0.0082417	0.31053	0.205739	0	inf	0	16	3.29183	157
19	q13.12	FXYD1	NM_021902	35629692	35633959	0.24118	0.241319	PANCAN	19q	amp	cent	p	1	p	0.95	28493000	37754420	0.0082417	0.31053	0.205739	0	inf	0	16	3.29183	157
19	q13.12	FXYD7	NM_022006	35634153	35645205	0.241325	0.241686	PANCAN	19q	amp	cent	p	1	p	0.95	28493000	37754420	0.0082417	0.31053	0.205739	0	inf	0	16	3.29183	157
19	q13.12	FXYD5	NM_014164	35645624	35660788	0.2417	0.242195	PANCAN	19q	amp	cent	p	1	p	0.95	28493000	37754420	0.0082417	0.31053	0.205739	0	inf	0	16	3.29183	157
19	q13.12	FAM187B	NM_152481	35715703	35719628	0.243987	0.244115	PANCAN	19q	amp	cent	p	1	p	0.95	28493000	37754420	0.0082417	0.31053	0.205739	0	inf	0	16	3.29183	157
19	q13.12	LSR	NM_205835	35739558	35758867	0.244766	0.245396	PANCAN	19q	amp	cent	p	1	p	0.95	28493000	37754420	0.0082417	0.31053	0.205739	0	inf	0	16	3.29183	157
19	q13.12	USF2	NM_001321150	35759880	35770724	0.245429	0.245783	PANCAN	19q	amp	cent	p	1	p	0.95	28493000	37754420	0.0082417	0.31053	0.205739	0	inf	0	16	3.29183	157
19	q13.12	HAMP	NM_021175	35773248	35776045	0.245865	0.245957	PANCAN	19q	amp	cent	p	1	p	0.95	28493000	37754420	0.0082417	0.31053	0.205739	0	inf	0	16	3.29183	157
19	q13.12	MAG	NM_001199216	35782988	35804709	0.246183	0.246892	PANCAN	19q	amp	cent	p	1	p	0.95	28493000	37754420	0.0082417	0.31053	0.205739	0	inf	0	16	3.29183	157
19	q13.12	CD22	NM_001185101	35820071	35838264	0.247394	0.247987	PANCAN	19q	amp	cent	p	1	p	0.95	28493000	37754420	0.0082417	0.31053	0.205739	0	inf	0	16	3.29183	157
19	q13.12	MIR5196	NR_049828	35836415	35836530	0.247927	0.247931	PANCAN	19q	amp	cent	p	1	p	0.95	28493000	37754420	0.0082417	0.31053	0.205739	0	inf	0	16	3.29183	157
19	q13.12	FFAR1	NM_005303	35842444	35843367	0.248124	0.248154	PANCAN	19q	amp	cent	p	1	p	0.95	28493000	37754420	0.0082417	0.31053	0.205739	0	inf	0	16	3.29183	157
19	q13.12	FFAR3	NM_005304	35849361	35851389	0.24835	0.248416	PANCAN	19q	amp	cent	p	1	p	0.95	28493000	37754420	0.0082417	0.31053	0.205739	0	inf	0	16	3.29183	157
19	q13.12	GPR42	NM_001348195	35861996	35863355	0.248762	0.248806	PANCAN	19q	amp	cent	p	1	p	0.95	28493000	37754420	0.0082417	0.31053	0.205739	0	inf	0	16	3.29183	157
19	q13.12	LINC01531	NR_040046	35896508	35907742	0.249888	0.250255	PANCAN	19q	amp	cent	p	1	p	0.95	28493000	37754420	0.0082417	0.31053	0.205739	0	inf	0	16	3.29183	157
19	q13.12	FFAR2	NM_005306	35940616	35942669	0.251328	0.251395	PANCAN	19q	amp	cent	p	1	p	0.95	28493000	37754420	0.0082417	0.31053	0.205739	0	inf	0	16	3.29183	157
19	q13.12	KRTDAP	NM_207392	35978225	35981433	0.252556	0.25266	PANCAN	19q	amp	cent	p	1	p	0.95	28493000	37754420	0.0082417	0.31053	0.205739	0	inf	0	16	3.29183	157
19	q13.12	DMKN	NM_001126056	35988118	36004560	0.252879	0.253415	PANCAN	19q	amp	cent	p	1	p	0.95	28493000	37754420	0.0082417	0.31053	0.205739	0	inf	0	16	3.29183	157
19	q13.12	SBSN	NM_001166034	36014268	36019253	0.253732	0.253895	PANCAN	19q	amp	cent	p	1	p	0.95	28493000	37754420	0.0082417	0.31053	0.205739	0	inf	0	16	3.29183	157
19	q13.12	GAPDHS	NM_014364	36024313	36036221	0.25406	0.254449	PANCAN	19q	amp	cent	p	1	p	0.95	28493000	37754420	0.0082417	0.31053	0.205739	0	inf	0	16	3.29183	157
19	q13.12	TMEM147-AS1	NR_038396	36031639	36036931	0.254299	0.254472	PANCAN	19q	amp	cent	p	1	p	0.95	28493000	37754420	0.0082417	0.31053	0.205739	0	inf	0	16	3.29183	157
19	q13.12	TMEM147	NM_032635	36036501	36038429	0.254458	0.254521	PANCAN	19q	amp	cent	p	1	p	0.95	28493000	37754420	0.0082417	0.31053	0.205739	0	inf	0	16	3.29183	157
19	q13.12	ATP4A	NM_000704	36041094	36054560	0.254608	0.255047	PANCAN	19q	amp	cent	p	1	p	0.95	28493000	37754420	0.0082417	0.31053	0.205739	0	inf	0	16	3.29183	157
19	q13.12	LINC01766	NR_110750	36088796	36092403	0.256165	0.256282	PANCAN	19q	amp	cent	p	1	p	0.95	28493000	37754420	0.0082417	0.31053	0.205739	0	inf	0	16	3.29183	157
19	q13.12	HAUS5	NM_015302	36103645	36116251	0.256649	0.257061	PANCAN	19q	amp	cent	p	1	p	0.95	28493000	37754420	0.0082417	0.31053	0.205739	0	inf	0	16	3.29183	157
19	q13.12	RBM42	NM_024321	36119917	36128588	0.25718	0.257463	PANCAN	19q	amp	cent	p	1	p	0.95	28493000	37754420	0.0082417	0.31053	0.205739	0	inf	0	16	3.29183	157
19	q13.12	ETV2	NM_014209	36132638	36135773	0.257596	0.257698	PANCAN	19q	amp	cent	p	1	p	0.95	28493000	37754420	0.0082417	0.31053	0.205739	0	inf	0	16	3.29183	157
19	q13.12	COX6B1	NM_001863	36139124	36149686	0.257807	0.258152	PANCAN	19q	amp	cent	p	1	p	0.95	28493000	37754420	0.0082417	0.31053	0.205739	0	inf	0	16	3.29183	157
19	q13.12	UPK1A	NM_001281443	36157417	36169387	0.258404	0.258795	PANCAN	19q	amp	cent	p	1	p	0.95	28493000	37754420	0.0082417	0.31053	0.205739	0	inf	0	16	3.29183	157
19	q13.12	UPK1A-AS1	NR_046420	36158849	36164193	0.258451	0.258626	PANCAN	19q	amp	cent	p	1	p	0.95	28493000	37754420	0.0082417	0.31053	0.205739	0	inf	0	16	3.29183	157
19	q13.12	ZBTB32	NM_001316903	36195388	36207940	0.259644	0.260053	PANCAN	19q	amp	cent	p	1	p	0.95	28493000	37754420	0.0082417	0.31053	0.205739	0	inf	0	16	3.29183	157
19	q13.12	KMT2B	NM_014727	36208920	36229781	0.260085	0.260766	PANCAN	19q	amp	cent	p	1	p	0.95	28493000	37754420	0.0082417	0.31053	0.205739	0	inf	0	16	3.29183	157
19	q13.12	IGFLR1	NM_024660	36229702	36233351	0.260764	0.260883	PANCAN	19q	amp	cent	p	1	p	0.95	28493000	37754420	0.0082417	0.31053	0.205739	0	inf	0	16	3.29183	157
19	q13.12	U2AF1L4	NM_144987	36233427	36236343	0.260885	0.26098	PANCAN	19q	amp	cent	p	1	p	0.95	28493000	37754420	0.0082417	0.31053	0.205739	0	inf	0	16	3.29183	157
19	q13.12	PSENEN	NM_001281532	36236477	36238420	0.260985	0.261048	PANCAN	19q	amp	cent	p	1	p	0.95	28493000	37754420	0.0082417	0.31053	0.205739	0	inf	0	16	3.29183	157
19	q13.12	LIN37	NM_019104	36239261	36245420	0.261076	0.261277	PANCAN	19q	amp	cent	p	1	p	0.95	28493000	37754420	0.0082417	0.31053	0.205739	0	inf	0	16	3.29183	157
19	q13.12	HSPB6	NM_144617	36245466	36247930	0.261278	0.261359	PANCAN	19q	amp	cent	p	1	p	0.95	28493000	37754420	0.0082417	0.31053	0.205739	0	inf	0	16	3.29183	157
19	q13.12	PROSER3	NM_001039887	36249043	36260077	0.261395	0.261755	PANCAN	19q	amp	cent	p	1	p	0.95	28493000	37754420	0.0082417	0.31053	0.205739	0	inf	0	16	3.29183	157
19	q13.12	ARHGAP33	NM_001172630	36266416	36279724	0.261962	0.262396	PANCAN	19q	amp	cent	p	1	p	0.95	28493000	37754420	0.0082417	0.31053	0.205739	0	inf	0	16	3.29183	157
19	q13.12	LINC01529	NR_104176	36279777	36288811	0.262398	0.262693	PANCAN	19q	amp	cent	p	1	p	0.95	28493000	37754420	0.0082417	0.31053	0.205739	0	inf	0	16	3.29183	157
19	q13.12	PRODH2	NM_021232	36290891	36304201	0.262761	0.263195	PANCAN	19q	amp	cent	p	1	p	0.95	28493000	37754420	0.0082417	0.31053	0.205739	0	inf	0	16	3.29183	157
19	q13.12	NPHS1	NM_004646	36316273	36342895	0.263589	0.264458	PANCAN	19q	amp	cent	p	1	p	0.95	28493000	37754420	0.0082417	0.31053	0.205739	0	inf	0	16	3.29183	157
19	q13.12	KIRREL2	NM_199180	36347809	36358048	0.264619	0.264953	PANCAN	19q	amp	cent	p	1	p	0.95	28493000	37754420	0.0082417	0.31053	0.205739	0	inf	0	16	3.29183	157
19	q13.12	APLP1	NM_005166	36359346	36370699	0.264995	0.265366	PANCAN	19q	amp	cent	p	1	p	0.95	28493000	37754420	0.0082417	0.31053	0.205739	0	inf	0	16	3.29183	157
19	q13.12	NFKBID	NM_139239	36378853	36391564	0.265632	0.266047	PANCAN	19q	amp	cent	p	1	p	0.95	28493000	37754420	0.0082417	0.31053	0.205739	0	inf	0	16	3.29183	157
19	q13.12	HCST	NM_014266	36393381	36395173	0.266106	0.266165	PANCAN	19q	amp	cent	p	1	p	0.95	28493000	37754420	0.0082417	0.31053	0.205739	0	inf	0	16	3.29183	157
19	q13.12	TYROBP	NM_198125	36395302	36399211	0.266169	0.266296	PANCAN	19q	amp	cent	p	1	p	0.95	28493000	37754420	0.0082417	0.31053	0.205739	0	inf	0	16	3.29183	157
19	q13.12	LRFN3	NM_024509	36428021	36436097	0.267237	0.2675	PANCAN	19q	amp	cent	p	1	p	0.95	28493000	37754420	0.0082417	0.31053	0.205739	0	inf	0	16	3.29183	157
19	q13.12	LOC105372383	NR_136525	36438016	36454972	0.267563	0.268116	PANCAN	19q	amp	cent	p	1	p	0.95	28493000	37754420	0.0082417	0.31053	0.205739	0	inf	0	16	3.29183	157
19	q13.12	SDHAF1	NM_001042631	36486089	36487220	0.269132	0.269169	PANCAN	19q	amp	cent	p	1	p	0.95	28493000	37754420	0.0082417	0.31053	0.205739	0	inf	0	16	3.29183	157
19	q13.12	SYNE4	NM_001297735	36494200	36499695	0.269397	0.269576	PANCAN	19q	amp	cent	p	1	p	0.95	28493000	37754420	0.0082417	0.31053	0.205739	0	inf	0	16	3.29183	157
19	q13.12	ALKBH6	NM_001297701	36500017	36505145	0.269587	0.269754	PANCAN	19q	amp	cent	p	1	p	0.95	28493000	37754420	0.0082417	0.31053	0.205739	0	inf	0	16	3.29183	157
19	q13.12	LOC101927572	NM_001347907	36505400	36542019	0.269762	0.270958	PANCAN	19q	amp	cent	p	1	p	0.95	28493000	37754420	0.0082417	0.31053	0.205739	0	inf	0	16	3.29183	157
19	q13.12	CLIP3	NM_015526	36505561	36523797	0.269768	0.270363	PANCAN	19q	amp	cent	p	1	p	0.95	28493000	37754420	0.0082417	0.31053	0.205739	0	inf	0	16	3.29183	157
19	q13.12	THAP8	NM_001331104	36525886	36545664	0.270431	0.271077	PANCAN	19q	amp	cent	p	1	p	0.95	28493000	37754420	0.0082417	0.31053	0.205739	0	inf	0	16	3.29183	157
19	q13.12	WDR62	NM_173636	36545782	36596012	0.27108	0.27272	PANCAN	19q	amp	cent	p	1	p	0.95	28493000	37754420	0.0082417	0.31053	0.205739	0	inf	0	16	3.29183	157
19	q13.12	OVOL3	NM_001302757	36602104	36604613	0.272919	0.273001	PANCAN	19q	amp	cent	p	1	p	0.95	28493000	37754420	0.0082417	0.31053	0.205739	0	inf	0	16	3.29183	157
19	q13.12	POLR2I	NM_006233	36604610	36606206	0.273001	0.273053	PANCAN	19q	amp	cent	p	1	p	0.95	28493000	37754420	0.0082417	0.31053	0.205739	0	inf	0	16	3.29183	157
19	q13.12	TBCB	NM_001281	36605887	36616849	0.273042	0.2734	PANCAN	19q	amp	cent	p	1	p	0.95	28493000	37754420	0.0082417	0.31053	0.205739	0	inf	0	16	3.29183	157
19	q13.12	CAPNS1	NM_001749	36630827	36641255	0.273856	0.274197	PANCAN	19q	amp	cent	p	1	p	0.95	28493000	37754420	0.0082417	0.31053	0.205739	0	inf	0	16	3.29183	157
19	q13.12	COX7A1	NM_001864	36641823	36643771	0.274215	0.274279	PANCAN	19q	amp	cent	p	1	p	0.95	28493000	37754420	0.0082417	0.31053	0.205739	0	inf	0	16	3.29183	157
19	q13.12	ZNF565	NM_001042474	36672961	36705986	0.275231	0.276309	PANCAN	19q	amp	cent	p	1	p	0.95	28493000	37754420	0.0082417	0.31053	0.205739	0	inf	0	16	3.29183	157
19	q13.12	ZNF146	NM_001099638	36705503	36729675	0.276294	0.277083	PANCAN	19q	amp	cent	p	1	p	0.95	28493000	37754420	0.0082417	0.31053	0.205739	0	inf	0	16	3.29183	157
19	q13.12	LOC100134317	NR_029389	36802244	36803570	0.279451	0.279494	PANCAN	19q	amp	cent	p	1	p	0.95	28493000	37754420	0.0082417	0.31053	0.205739	0	inf	0	16	3.29183	157
19	q13.12	LINC00665	NR_038279	36803962	36822620	0.279507	0.280116	PANCAN	19q	amp	cent	p	1	p	0.95	28493000	37754420	0.0082417	0.31053	0.205739	0	inf	0	16	3.29183	157
19	q13.12	ZFP14	NM_001297619	36825354	36870105	0.280205	0.281666	PANCAN	19q	amp	cent	p	1	p	0.95	28493000	37754420	0.0082417	0.31053	0.205739	0	inf	0	16	3.29183	157
19	q13.12	ZFP82	NM_001321919	36874003	36909576	0.281793	0.282954	PANCAN	19q	amp	cent	p	1	p	0.95	28493000	37754420	0.0082417	0.31053	0.205739	0	inf	0	16	3.29183	157
19	q13.12	LOC644189	NR_033748	36912075	36913799	0.283036	0.283092	PANCAN	19q	amp	cent	p	1	p	0.95	28493000	37754420	0.0082417	0.31053	0.205739	0	inf	0	16	3.29183	157
19	q13.12	ZNF566	NM_001300970	36936020	36980804	0.283818	0.285279	PANCAN	19q	amp	cent	p	1	p	0.95	28493000	37754420	0.0082417	0.31053	0.205739	0	inf	0	16	3.29183	157
19	q13.12	LOC728752	NR_036504	36980528	36981942	0.28527	0.285316	PANCAN	19q	amp	cent	p	1	p	0.95	28493000	37754420	0.0082417	0.31053	0.205739	0	inf	0	16	3.29183	157
19	q13.12	ZNF260	NM_001166037	37001588	37019248	0.285958	0.286534	PANCAN	19q	amp	cent	p	1	p	0.95	28493000	37754420	0.0082417	0.31053	0.205739	0	inf	0	16	3.29183	157
19	q13.12	ZNF529	NM_001145649	37034516	37096178	0.287032	0.289045	PANCAN	19q	amp	cent	p	1	p	0.95	28493000	37754420	0.0082417	0.31053	0.205739	0	inf	0	16	3.29183	157
19	q13.12	ZNF529-AS1	NR_110703	37063971	37085618	0.287994	0.2887	PANCAN	19q	amp	cent	p	1	p	0.95	28493000	37754420	0.0082417	0.31053	0.205739	0	inf	0	16	3.29183	157
19	q13.12	ZNF382	NM_001256838	37096206	37119499	0.289046	0.289806	PANCAN	19q	amp	cent	p	1	p	0.95	28493000	37754420	0.0082417	0.31053	0.205739	0	inf	0	16	3.29183	157
19	q13.12	ZNF461	NM_001322823	37127522	37157755	0.290068	0.291055	PANCAN	19q	amp	cent	p	1	p	0.95	28493000	37754420	0.0082417	0.31053	0.205739	0	inf	0	16	3.29183	157
19	q13.12	LINC01534	NR_110707	37176340	37178351	0.291661	0.291727	PANCAN	19q	amp	cent	p	1	p	0.95	28493000	37754420	0.0082417	0.31053	0.205739	0	inf	0	16	3.29183	157
19	q13.12	ZNF567	NM_001322911	37178513	37212238	0.291732	0.292833	PANCAN	19q	amp	cent	p	1	p	0.95	28493000	37754420	0.0082417	0.31053	0.205739	0	inf	0	16	3.29183	157
19	q13.12	ZNF850	NM_001193552	37234379	37263716	0.293556	0.294513	PANCAN	19q	amp	cent	p	1	p	0.95	28493000	37754420	0.0082417	0.31053	0.205739	0	inf	0	16	3.29183	157
19	q13.12	LOC728485	NM_001294306	37264019	37267980	0.294523	0.294653	PANCAN	19q	amp	cent	p	1	p	0.95	28493000	37754420	0.0082417	0.31053	0.205739	0	inf	0	16	3.29183	157
19	q13.12	ZNF790-AS1	NR_040027	37288451	37319013	0.295321	0.296318	PANCAN	19q	amp	cent	p	1	p	0.95	28493000	37754420	0.0082417	0.31053	0.205739	0	inf	0	16	3.29183	157
19	q13.12	ZNF790	NM_001242800	37309223	37341689	0.295999	0.297058	PANCAN	19q	amp	cent	p	1	p	0.95	28493000	37754420	0.0082417	0.31053	0.205739	0	inf	0	16	3.29183	157
19	q13.12	ZNF345	NR_038362	37341787	37384120	0.297062	0.298443	PANCAN	19q	amp	cent	p	1	p	0.95	28493000	37754420	0.0082417	0.31053	0.205739	0	inf	0	16	3.29183	157
19	q13.12	ZNF829	NM_001037232	37379025	37407193	0.298277	0.299196	PANCAN	19q	amp	cent	p	1	p	0.95	28493000	37754420	0.0082417	0.31053	0.205739	0	inf	0	16	3.29183	157
19	q13.12	ZNF568	NM_001204838	37407230	37488834	0.299198	0.301861	PANCAN	19q	amp	cent	p	1	p	0.95	28493000	37754420	0.0082417	0.31053	0.205739	0	inf	0	16	3.29183	157
19	q13.12	ZNF420	NM_001329524	37569123	37621268	0.304482	0.306184	PANCAN	19q	amp	cent	p	1	p	0.95	28493000	37754420	0.0082417	0.31053	0.205739	0	inf	0	16	3.29183	157
19	q13.12	ZNF585A	NM_152655	37638339	37663643	0.306741	0.307567	PANCAN	19q	amp	cent	p	1	p	0.95	28493000	37754420	0.0082417	0.31053	0.205739	0	inf	0	16	3.29183	157
19	q13.12	ZNF585B	NM_152279	37672480	37701451	0.307855	0.308801	PANCAN	19q	amp	cent	p	1	p	0.95	28493000	37754420	0.0082417	0.31053	0.205739	0	inf	0	16	3.29183	157
19	q13.12	ZNF383	NM_001345947	37708827	37734826	0.309042	0.30989	PANCAN	19q	amp	cent	p	1	p	0.95	28493000	37754420	0.0082417	0.31053	0.205739	0	inf	0	16	3.29183	157
19	q13.12	LINC01535	NR_110719	37742786	37756437	0.31015	0.310596	PANCAN	19q	amp	cent	p	1	p	0.95	28493000	37754420	0.0082417	0.31053	0.205739	0	inf	0	16	3.29183	157
16	p13.13	ATF7IP2	NM_001256160	10479855	10577500	0.314981	0.31811	PANCAN	16p	del	tel	n	1	n	0.95	10512834	11106707	0.316038	0.335074	0.204409	0	inf	0	16	3.27054	9
16	p13.13	LINC01290	NR_149081	10608699	10622055	0.319111	0.319539	PANCAN	16p	del	tel	n	1	n	0.95	10512834	11106707	0.316038	0.335074	0.204409	0	inf	0	16	3.27054	9
16	p13.13	EMP2	NM_001424	10622278	10674573	0.319546	0.321222	PANCAN	16p	del	tel	n	1	n	0.95	10512834	11106707	0.316038	0.335074	0.204409	0	inf	0	16	3.27054	9
16	p13.13	TEKT5	NM_144674	10721360	10788802	0.322722	0.324884	PANCAN	16p	del	tel	n	1	n	0.95	10512834	11106707	0.316038	0.335074	0.204409	0	inf	0	16	3.27054	9
16	p13.13	NUBP1	NM_001278506	10837642	10863208	0.326449	0.327269	PANCAN	16p	del	tel	n	1	n	0.95	10512834	11106707	0.316038	0.335074	0.204409	0	inf	0	16	3.27054	9
16	p13.13	TVP23A	NR_134901	10854775	10912651	0.326998	0.328854	PANCAN	16p	del	tel	n	1	n	0.95	10512834	11106707	0.316038	0.335074	0.204409	0	inf	0	16	3.27054	9
16	p13.13	CIITA	NR_104444	10971054	11018840	0.330726	0.332257	PANCAN	16p	del	tel	n	1	n	0.95	10512834	11106707	0.316038	0.335074	0.204409	0	inf	0	16	3.27054	9
16	p13.13	DEXI	NM_014015	11022747	11036257	0.332383	0.332816	PANCAN	16p	del	tel	n	1	n	0.95	10512834	11106707	0.316038	0.335074	0.204409	0	inf	0	16	3.27054	9
16	p13.13	CLEC16A	NM_015226	11038344	11276046	0.332883	0.340502	PANCAN	16p	del	tel	n	1	n	0.95	10512834	11106707	0.316038	0.335074	0.204409	0	inf	0	16	3.27054	9
12	q15	RAP1B	NM_015646	69004618	69054385	0.68297	0.682441	PANCAN	12q	del	tel	n	1	n	0.95	69022295	72088228	0.650144	0.682782	0.203875	0	inf	0	16	3.262	30
12	q15	LOC100507250	NR_038930	69068150	69080639	0.682294	0.682161	PANCAN	12q	del	tel	n	1	n	0.95	69022295	72088228	0.650144	0.682782	0.203875	0	inf	0	16	3.262	30
12	q15	NUP107	NM_020401	69080730	69139594	0.68216	0.681534	PANCAN	12q	del	tel	n	1	n	0.95	69022295	72088228	0.650144	0.682782	0.203875	0	inf	0	16	3.262	30
12	q15	SLC35E3	NM_018656	69139865	69162470	0.681531	0.68129	PANCAN	12q	del	tel	n	1	n	0.95	69022295	72088228	0.650144	0.682782	0.203875	0	inf	0	16	3.262	30
12	q15	LOC100130075	NR_073494	69198216	69199274	0.68091	0.680898	PANCAN	12q	del	tel	n	1	n	0.95	69022295	72088228	0.650144	0.682782	0.203875	0	inf	0	16	3.262	30
12	q15	MDM2	NM_002392	69201951	69239324	0.68087	0.680472	PANCAN	12q	del	tel	n	1	n	0.95	69022295	72088228	0.650144	0.682782	0.203875	0	inf	0	16	3.262	30
12	q15	CPM	NM_001874	69244955	69357020	0.680412	0.679219	PANCAN	12q	del	tel	n	1	n	0.95	69022295	72088228	0.650144	0.682782	0.203875	0	inf	0	16	3.262	30
12	q15	CPSF6	NM_007007	69633316	69668138	0.676278	0.675907	PANCAN	12q	del	tel	n	1	n	0.95	69022295	72088228	0.650144	0.682782	0.203875	0	inf	0	16	3.262	30
12	q15	MIR1279	NR_031692	69666936	69666998	0.67592	0.675919	PANCAN	12q	del	tel	n	1	n	0.95	69022295	72088228	0.650144	0.682782	0.203875	0	inf	0	16	3.262	30
12	q15	LYZ	NM_000239	69742133	69748013	0.675119	0.675057	PANCAN	12q	del	tel	n	1	n	0.95	69022295	72088228	0.650144	0.682782	0.203875	0	inf	0	16	3.262	30
12	q15	YEATS4	NM_006530	69753489	69784650	0.674998	0.674667	PANCAN	12q	del	tel	n	1	n	0.95	69022295	72088228	0.650144	0.682782	0.203875	0	inf	0	16	3.262	30
12	q15	FRS2	NM_001278355	69864128	69973571	0.673821	0.672656	PANCAN	12q	del	tel	n	1	n	0.95	69022295	72088228	0.650144	0.682782	0.203875	0	inf	0	16	3.262	30
12	q15	SNORA113	NR_145803	69909219	69909373	0.673341	0.673339	PANCAN	12q	del	tel	n	1	n	0.95	69022295	72088228	0.650144	0.682782	0.203875	0	inf	0	16	3.262	30
12	q15	MIR3913-1	NR_037475	69978501	69978603	0.672603	0.672602	PANCAN	12q	del	tel	n	1	n	0.95	69022295	72088228	0.650144	0.682782	0.203875	0	inf	0	16	3.262	30
12	q15	MIR3913-2	NR_037476	69978502	69978602	0.672603	0.672602	PANCAN	12q	del	tel	n	1	n	0.95	69022295	72088228	0.650144	0.682782	0.203875	0	inf	0	16	3.262	30
12	q15	CCT2	NM_006431	69979207	69995357	0.672596	0.672424	PANCAN	12q	del	tel	n	1	n	0.95	69022295	72088228	0.650144	0.682782	0.203875	0	inf	0	16	3.262	30
12	q15	LRRC10	NM_201550	70002344	70004942	0.672349	0.672322	PANCAN	12q	del	tel	n	1	n	0.95	69022295	72088228	0.650144	0.682782	0.203875	0	inf	0	16	3.262	30
12	q15	BEST3	NM_001282614	70037287	70093196	0.671977	0.671382	PANCAN	12q	del	tel	n	1	n	0.95	69022295	72088228	0.650144	0.682782	0.203875	0	inf	0	16	3.262	30
12	q15	RAB3IP	NR_103519	70132465	70216984	0.670964	0.670064	PANCAN	12q	del	tel	n	1	n	0.95	69022295	72088228	0.650144	0.682782	0.203875	0	inf	0	16	3.262	30
12	q15	MYRFL	NM_182530	70219102	70352505	0.670042	0.668622	PANCAN	12q	del	tel	n	1	n	0.95	69022295	72088228	0.650144	0.682782	0.203875	0	inf	0	16	3.262	30
12	q15	LINC01481	NR_120460	70615969	70637140	0.665817	0.665592	PANCAN	12q	del	tel	n	1	n	0.95	69022295	72088228	0.650144	0.682782	0.203875	0	inf	0	16	3.262	30
12	q15	CNOT2	NM_014515	70636773	70748773	0.665596	0.664403	PANCAN	12q	del	tel	n	1	n	0.95	69022295	72088228	0.650144	0.682782	0.203875	0	inf	0	16	3.262	30
12	q15	KCNMB4	NM_014505	70760061	70828072	0.664283	0.663559	PANCAN	12q	del	tel	n	1	n	0.95	69022295	72088228	0.650144	0.682782	0.203875	0	inf	0	16	3.262	30
12	q15	PTPRB	NM_001330204	70909650	71031220	0.662691	0.661397	PANCAN	12q	del	tel	n	1	n	0.95	69022295	72088228	0.650144	0.682782	0.203875	0	inf	0	16	3.262	30
12	q15	PTPRR	NM_002849	71031852	71314584	0.66139	0.65838	PANCAN	12q	del	tel	n	1	n	0.95	69022295	72088228	0.650144	0.682782	0.203875	0	inf	0	16	3.262	30
12	q21.1	TSPAN8	NM_004616	71518876	71551779	0.656205	0.655855	PANCAN	12q	del	tel	n	1	n	0.95	69022295	72088228	0.650144	0.682782	0.203875	0	inf	0	16	3.262	30
12	q21.1	LGR5	NM_001277226	71833549	71980088	0.652856	0.651296	PANCAN	12q	del	tel	n	1	n	0.95	69022295	72088228	0.650144	0.682782	0.203875	0	inf	0	16	3.262	30
12	q21.1	ZFC3H1	NM_144982	72003378	72057749	0.651048	0.650469	PANCAN	12q	del	tel	n	1	n	0.95	69022295	72088228	0.650144	0.682782	0.203875	0	inf	0	16	3.262	30
12	q21.1	THAP2	NM_031435	72057676	72074428	0.65047	0.650291	PANCAN	12q	del	tel	n	1	n	0.95	69022295	72088228	0.650144	0.682782	0.203875	0	inf	0	16	3.262	30
12	q21.1	TMEM19	NM_018279	72079877	72097839	0.650233	0.650042	PANCAN	12q	del	tel	n	1	n	0.95	69022295	72088228	0.650144	0.682782	0.203875	0	inf	0	16	3.262	30
7	q22.1	NPTX2	NM_002523	98246596	98259181	0.631224	0.631092	PANCAN	7q	del	tel	n	1	n	0.95	98108470	100117279	0.611589	0.632674	0.202113	0	inf	0	16	3.23381	68
7	q22.1	TMEM130	NM_152913	98444110	98467673	0.629151	0.628904	PANCAN	7q	del	tel	n	1	n	0.95	98108470	100117279	0.611589	0.632674	0.202113	0	inf	0	16	3.23381	68
7	q22.1	TRRAP	NM_003496	98476112	98610866	0.628815	0.627401	PANCAN	7q	del	tel	n	1	n	0.95	98108470	100117279	0.611589	0.632674	0.202113	0	inf	0	16	3.23381	68
7	q22.1	MIR3609	NR_037403	98479272	98479352	0.628782	0.628781	PANCAN	7q	del	tel	n	1	n	0.95	98108470	100117279	0.611589	0.632674	0.202113	0	inf	0	16	3.23381	68
7	q22.1	SCARNA28	NR_132754	98479319	98479513	0.628781	0.628779	PANCAN	7q	del	tel	n	1	n	0.95	98108470	100117279	0.611589	0.632674	0.202113	0	inf	0	16	3.23381	68
7	q22.1	LOC101927550	NR_110102	98610787	98634102	0.627401	0.627157	PANCAN	7q	del	tel	n	1	n	0.95	98108470	100117279	0.611589	0.632674	0.202113	0	inf	0	16	3.23381	68
7	q22.1	SMURF1	NM_020429	98625057	98741743	0.627252	0.626027	PANCAN	7q	del	tel	n	1	n	0.95	98108470	100117279	0.611589	0.632674	0.202113	0	inf	0	16	3.23381	68
7	q22.1	KPNA7	NM_001145715	98771196	98805112	0.625718	0.625362	PANCAN	7q	del	tel	n	1	n	0.95	98108470	100117279	0.611589	0.632674	0.202113	0	inf	0	16	3.23381	68
7	q22.1	MYH16	NR_002147	98870923	98895594	0.624671	0.624412	PANCAN	7q	del	tel	n	1	n	0.95	98108470	100117279	0.611589	0.632674	0.202113	0	inf	0	16	3.23381	68
7	q22.1	ARPC1A	NM_001190996	98923495	98963885	0.624119	0.623695	PANCAN	7q	del	tel	n	1	n	0.95	98108470	100117279	0.611589	0.632674	0.202113	0	inf	0	16	3.23381	68
7	q22.1	ARPC1B	NM_005720	98972297	98992404	0.623607	0.623396	PANCAN	7q	del	tel	n	1	n	0.95	98108470	100117279	0.611589	0.632674	0.202113	0	inf	0	16	3.23381	68
7	q22.1	PDAP1	NM_014891	98992297	99006305	0.623397	0.62325	PANCAN	7q	del	tel	n	1	n	0.95	98108470	100117279	0.611589	0.632674	0.202113	0	inf	0	16	3.23381	68
7	q22.1	BUD31	NM_003910	99006600	99017239	0.623247	0.623135	PANCAN	7q	del	tel	n	1	n	0.95	98108470	100117279	0.611589	0.632674	0.202113	0	inf	0	16	3.23381	68
7	q22.1	ATP5MF-PTCD1	NM_001198879	99014361	99063824	0.623166	0.622646	PANCAN	7q	del	tel	n	1	n	0.95	98108470	100117279	0.611589	0.632674	0.202113	0	inf	0	16	3.23381	68
7	q22.1	PTCD1	NM_015545	99014361	99036462	0.623166	0.622934	PANCAN	7q	del	tel	n	1	n	0.95	98108470	100117279	0.611589	0.632674	0.202113	0	inf	0	16	3.23381	68
7	q22.1	CPSF4	NM_006693	99036562	99055000	0.622932	0.622739	PANCAN	7q	del	tel	n	1	n	0.95	98108470	100117279	0.611589	0.632674	0.202113	0	inf	0	16	3.23381	68
7	q22.1	ATP5MF	NM_004889	99055783	99063824	0.622731	0.622646	PANCAN	7q	del	tel	n	1	n	0.95	98108470	100117279	0.611589	0.632674	0.202113	0	inf	0	16	3.23381	68
7	q22.1	ZNF789	NM_001351004	99070514	99085217	0.622576	0.622422	PANCAN	7q	del	tel	n	1	n	0.95	98108470	100117279	0.611589	0.632674	0.202113	0	inf	0	16	3.23381	68
7	q22.1	ZNF394	NM_001345968	99084141	99097931	0.622433	0.622288	PANCAN	7q	del	tel	n	1	n	0.95	98108470	100117279	0.611589	0.632674	0.202113	0	inf	0	16	3.23381	68
7	q22.1	ZKSCAN5	NM_145102	99102266	99131445	0.622243	0.621937	PANCAN	7q	del	tel	n	1	n	0.95	98108470	100117279	0.611589	0.632674	0.202113	0	inf	0	16	3.23381	68
7	q22.1	FAM200A	NM_145111	99143922	99149757	0.621806	0.621744	PANCAN	7q	del	tel	n	1	n	0.95	98108470	100117279	0.611589	0.632674	0.202113	0	inf	0	16	3.23381	68
7	q22.1	ZNF655	NM_138494	99156044	99174076	0.621678	0.621489	PANCAN	7q	del	tel	n	1	n	0.95	98108470	100117279	0.611589	0.632674	0.202113	0	inf	0	16	3.23381	68
7	q22.1	TMEM225B	NM_001195543	99195688	99208668	0.621262	0.621126	PANCAN	7q	del	tel	n	1	n	0.95	98108470	100117279	0.611589	0.632674	0.202113	0	inf	0	16	3.23381	68
7	q22.1	ZSCAN25	NM_001350984	99214570	99270161	0.621064	0.620481	PANCAN	7q	del	tel	n	1	n	0.95	98108470	100117279	0.611589	0.632674	0.202113	0	inf	0	16	3.23381	68
7	q22.1	CYP3A5	NR_033807	99245811	99277649	0.620736	0.620402	PANCAN	7q	del	tel	n	1	n	0.95	98108470	100117279	0.611589	0.632674	0.202113	0	inf	0	16	3.23381	68
7	q22.1	CYP3A7-CYP3A51P	NM_001256497	99282301	99332823	0.620353	0.619823	PANCAN	7q	del	tel	n	1	n	0.95	98108470	100117279	0.611589	0.632674	0.202113	0	inf	0	16	3.23381	68
7	q22.1	CYP3A7	NM_000765	99302659	99332823	0.620139	0.619823	PANCAN	7q	del	tel	n	1	n	0.95	98108470	100117279	0.611589	0.632674	0.202113	0	inf	0	16	3.23381	68
7	q22.1	CYP3A4	NM_001202855	99354582	99381811	0.619594	0.619309	PANCAN	7q	del	tel	n	1	n	0.95	98108470	100117279	0.611589	0.632674	0.202113	0	inf	0	16	3.23381	68
7	q22.1	CYP3A43	NM_057096	99425635	99463727	0.618849	0.618449	PANCAN	7q	del	tel	n	1	n	0.95	98108470	100117279	0.611589	0.632674	0.202113	0	inf	0	16	3.23381	68
7	q22.1	OR2AE1	NM_001005276	99473684	99474656	0.618344	0.618334	PANCAN	7q	del	tel	n	1	n	0.95	98108470	100117279	0.611589	0.632674	0.202113	0	inf	0	16	3.23381	68
7	q22.1	TRIM4	NM_033091	99488029	99517223	0.618194	0.617887	PANCAN	7q	del	tel	n	1	n	0.95	98108470	100117279	0.611589	0.632674	0.202113	0	inf	0	16	3.23381	68
7	q22.1	GJC3	NM_181538	99520891	99527243	0.617849	0.617782	PANCAN	7q	del	tel	n	1	n	0.95	98108470	100117279	0.611589	0.632674	0.202113	0	inf	0	16	3.23381	68
7	q22.1	AZGP1	NM_001185	99564349	99573735	0.617393	0.617294	PANCAN	7q	del	tel	n	1	n	0.95	98108470	100117279	0.611589	0.632674	0.202113	0	inf	0	16	3.23381	68
7	q22.1	AZGP1P1	NR_036679	99578384	99581860	0.617245	0.617209	PANCAN	7q	del	tel	n	1	n	0.95	98108470	100117279	0.611589	0.632674	0.202113	0	inf	0	16	3.23381	68
7	q22.1	ZKSCAN1	NM_001346579	99613174	99642997	0.61688	0.616567	PANCAN	7q	del	tel	n	1	n	0.95	98108470	100117279	0.611589	0.632674	0.202113	0	inf	0	16	3.23381	68
7	q22.1	ZSCAN21	NM_145914	99647416	99662663	0.616521	0.616361	PANCAN	7q	del	tel	n	1	n	0.95	98108470	100117279	0.611589	0.632674	0.202113	0	inf	0	16	3.23381	68
7	q22.1	ZNF3	NM_001318137	99661469	99679387	0.616373	0.616185	PANCAN	7q	del	tel	n	1	n	0.95	98108470	100117279	0.611589	0.632674	0.202113	0	inf	0	16	3.23381	68
7	q22.1	COPS6	NM_006833	99686582	99689822	0.61611	0.616076	PANCAN	7q	del	tel	n	1	n	0.95	98108470	100117279	0.611589	0.632674	0.202113	0	inf	0	16	3.23381	68
7	q22.1	MCM7	NM_005916	99690350	99699563	0.61607	0.615974	PANCAN	7q	del	tel	n	1	n	0.95	98108470	100117279	0.611589	0.632674	0.202113	0	inf	0	16	3.23381	68
7	q22.1	MIR25	NR_029498	99691182	99691266	0.616061	0.616061	PANCAN	7q	del	tel	n	1	n	0.95	98108470	100117279	0.611589	0.632674	0.202113	0	inf	0	16	3.23381	68
7	q22.1	MIR93	NR_029510	99691390	99691470	0.616059	0.616058	PANCAN	7q	del	tel	n	1	n	0.95	98108470	100117279	0.611589	0.632674	0.202113	0	inf	0	16	3.23381	68
7	q22.1	MIR106B	NR_029831	99691615	99691697	0.616057	0.616056	PANCAN	7q	del	tel	n	1	n	0.95	98108470	100117279	0.611589	0.632674	0.202113	0	inf	0	16	3.23381	68
7	q22.1	AP4M1	NM_004722	99699129	99704803	0.615978	0.615919	PANCAN	7q	del	tel	n	1	n	0.95	98108470	100117279	0.611589	0.632674	0.202113	0	inf	0	16	3.23381	68
7	q22.1	TAF6	NM_001190415	99704692	99717481	0.61592	0.615785	PANCAN	7q	del	tel	n	1	n	0.95	98108470	100117279	0.611589	0.632674	0.202113	0	inf	0	16	3.23381	68
7	q22.1	CNPY4	NM_152755	99717264	99723128	0.615788	0.615726	PANCAN	7q	del	tel	n	1	n	0.95	98108470	100117279	0.611589	0.632674	0.202113	0	inf	0	16	3.23381	68
7	q22.1	MBLAC1	NM_203397	99724316	99726121	0.615714	0.615695	PANCAN	7q	del	tel	n	1	n	0.95	98108470	100117279	0.611589	0.632674	0.202113	0	inf	0	16	3.23381	68
7	q22.1	LAMTOR4	NR_134527	99746521	99751835	0.615481	0.615425	PANCAN	7q	del	tel	n	1	n	0.95	98108470	100117279	0.611589	0.632674	0.202113	0	inf	0	16	3.23381	68
7	q22.1	C7orf43	NM_018275	99752042	99756344	0.615423	0.615378	PANCAN	7q	del	tel	n	1	n	0.95	98108470	100117279	0.611589	0.632674	0.202113	0	inf	0	16	3.23381	68
7	q22.1	MIR4658	NR_039802	99754227	99754292	0.6154	0.615399	PANCAN	7q	del	tel	n	1	n	0.95	98108470	100117279	0.611589	0.632674	0.202113	0	inf	0	16	3.23381	68
7	q22.1	GAL3ST4	NM_024637	99756864	99766373	0.615372	0.615272	PANCAN	7q	del	tel	n	1	n	0.95	98108470	100117279	0.611589	0.632674	0.202113	0	inf	0	16	3.23381	68
7	q22.1	GPC2	NM_152742	99767228	99775049	0.615263	0.615181	PANCAN	7q	del	tel	n	1	n	0.95	98108470	100117279	0.611589	0.632674	0.202113	0	inf	0	16	3.23381	68
7	q22.1	STAG3	NM_001282716	99775346	99812010	0.615178	0.614793	PANCAN	7q	del	tel	n	1	n	0.95	98108470	100117279	0.611589	0.632674	0.202113	0	inf	0	16	3.23381	68
7	q22.1	CASTOR3	NR_028040	99798277	99869855	0.614937	0.614186	PANCAN	7q	del	tel	n	1	n	0.95	98108470	100117279	0.611589	0.632674	0.202113	0	inf	0	16	3.23381	68
7	q22.1	PVRIG	NM_024070	99816870	99819111	0.614742	0.614719	PANCAN	7q	del	tel	n	1	n	0.95	98108470	100117279	0.611589	0.632674	0.202113	0	inf	0	16	3.23381	68
7	q22.1	SPDYE3	NM_001004351	99905324	99919819	0.613814	0.613662	PANCAN	7q	del	tel	n	1	n	0.95	98108470	100117279	0.611589	0.632674	0.202113	0	inf	0	16	3.23381	68
7	q22.1	PMS2P1	NR_003613	99918262	99933930	0.613678	0.613514	PANCAN	7q	del	tel	n	1	n	0.95	98108470	100117279	0.611589	0.632674	0.202113	0	inf	0	16	3.23381	68
7	q22.1	STAG3L5P-PVRIG2P-PILRB	NR_036569	99933687	99965454	0.613516	0.613183	PANCAN	7q	del	tel	n	1	n	0.95	98108470	100117279	0.611589	0.632674	0.202113	0	inf	0	16	3.23381	68
7	q22.1	STAG3L5P	NR_103720	99933701	99938951	0.613516	0.613461	PANCAN	7q	del	tel	n	1	n	0.95	98108470	100117279	0.611589	0.632674	0.202113	0	inf	0	16	3.23381	68
7	q22.1	PVRIG2P	NR_103728	99949940	99951559	0.613346	0.613329	PANCAN	7q	del	tel	n	1	n	0.95	98108470	100117279	0.611589	0.632674	0.202113	0	inf	0	16	3.23381	68
7	q22.1	MIR6840	NR_106899	99954273	99954344	0.6133	0.613299	PANCAN	7q	del	tel	n	1	n	0.95	98108470	100117279	0.611589	0.632674	0.202113	0	inf	0	16	3.23381	68
7	q22.1	PILRB	NM_178238	99955625	99965454	0.613286	0.613183	PANCAN	7q	del	tel	n	1	n	0.95	98108470	100117279	0.611589	0.632674	0.202113	0	inf	0	16	3.23381	68
7	q22.1	PILRA	NM_013439	99971067	99997722	0.613124	0.612844	PANCAN	7q	del	tel	n	1	n	0.95	98108470	100117279	0.611589	0.632674	0.202113	0	inf	0	16	3.23381	68
7	q22.1	ZCWPW1	NM_017984	99998494	100026431	0.612836	0.612543	PANCAN	7q	del	tel	n	1	n	0.95	98108470	100117279	0.611589	0.632674	0.202113	0	inf	0	16	3.23381	68
7	q22.1	MEPCE	NM_001194992	100026412	100031749	0.612543	0.612487	PANCAN	7q	del	tel	n	1	n	0.95	98108470	100117279	0.611589	0.632674	0.202113	0	inf	0	16	3.23381	68
7	q22.1	PPP1R35	NM_001346938	100032899	100034096	0.612475	0.612462	PANCAN	7q	del	tel	n	1	n	0.95	98108470	100117279	0.611589	0.632674	0.202113	0	inf	0	16	3.23381	68
7	q22.1	C7orf61	NM_001004323	100054237	100061894	0.612251	0.61217	PANCAN	7q	del	tel	n	1	n	0.95	98108470	100117279	0.611589	0.632674	0.202113	0	inf	0	16	3.23381	68
7	q22.1	TSC22D4	NM_030935	100064141	100076902	0.612147	0.612013	PANCAN	7q	del	tel	n	1	n	0.95	98108470	100117279	0.611589	0.632674	0.202113	0	inf	0	16	3.23381	68
7	q22.1	NYAP1	NM_173564	100081549	100092424	0.611964	0.61185	PANCAN	7q	del	tel	n	1	n	0.95	98108470	100117279	0.611589	0.632674	0.202113	0	inf	0	16	3.23381	68
19	p13.3	PIP5K1C	NM_012398	3630178	3700477	0.140779	0.143736	PANCAN	19p	del	tel	p	2	n-lp	0.95	3695700	3815535	0.143535	0.148577	0.195008	0	inf	0	16	3.12012	7
19	p13.3	TJP3	NM_001267560	3708334	3750811	0.144067	0.145854	PANCAN	19p	del	tel	p	2	n-lp	0.95	3695700	3815535	0.143535	0.148577	0.195008	0	inf	0	16	3.12012	7
19	p13.3	APBA3	NM_004886	3750770	3761673	0.145852	0.146311	PANCAN	19p	del	tel	p	2	n-lp	0.95	3695700	3815535	0.143535	0.148577	0.195008	0	inf	0	16	3.12012	7
19	p13.3	MRPL54	NM_172251	3762664	3767563	0.146352	0.146559	PANCAN	19p	del	tel	p	2	n-lp	0.95	3695700	3815535	0.143535	0.148577	0.195008	0	inf	0	16	3.12012	7
19	p13.3	RAX2	NM_032753	3769088	3772219	0.146623	0.146754	PANCAN	19p	del	tel	p	2	n-lp	0.95	3695700	3815535	0.143535	0.148577	0.195008	0	inf	0	16	3.12012	7
19	p13.3	MATK	NM_002378	3777966	3801810	0.146996	0.147999	PANCAN	19p	del	tel	p	2	n-lp	0.95	3695700	3815535	0.143535	0.148577	0.195008	0	inf	0	16	3.12012	7
19	p13.3	ZFR2	NM_015174	3804021	3869027	0.148092	0.150827	PANCAN	19p	del	tel	p	2	n-lp	0.95	3695700	3815535	0.143535	0.148577	0.195008	0	inf	0	16	3.12012	7
18	q21.2	SMAD4	NM_005359	48556582	48611411	0.488752	0.487814	PANCAN	18q	del	tel	p	1	p	0.95	48595048	48980675	0.481493	0.488094	0.194841	0	inf	0	16	3.11746	3
18	q21.2	MEX3C	NM_016626	48700919	48724051	0.486282	0.485886	PANCAN	18q	del	tel	p	1	p	0.95	48595048	48980675	0.481493	0.488094	0.194841	0	inf	0	16	3.11746	3
18	q21.2	LINC01630	NR_040074	48918411	49088839	0.482559	0.479641	PANCAN	18q	del	tel	p	1	p	0.95	48595048	48980675	0.481493	0.488094	0.194841	0	inf	0	16	3.11746	3
19	q13.2	CIC	NM_001304815	42772688	42799948	0.474323	0.475213	PANCAN	19q	amp	cent	n	2	p-rn	0.95	42775930	47388577	0.474429	0.624984	0.187779	0	inf	0	16	3.00446	161
19	q13.2	PAFAH1B3	NM_001145940	42801184	42806952	0.475254	0.475442	PANCAN	19q	amp	cent	n	2	p-rn	0.95	42775930	47388577	0.474429	0.624984	0.187779	0	inf	0	16	3.00446	161
19	q13.2	PRR19	NM_199285	42806283	42814973	0.47542	0.475704	PANCAN	19q	amp	cent	n	2	p-rn	0.95	42775930	47388577	0.474429	0.624984	0.187779	0	inf	0	16	3.00446	161
19	q13.2	TMEM145	NM_173633	42817476	42829214	0.475785	0.476168	PANCAN	19q	amp	cent	n	2	p-rn	0.95	42775930	47388577	0.474429	0.624984	0.187779	0	inf	0	16	3.00446	161
19	q13.2	MEGF8	NM_001410	42829760	42882921	0.476186	0.477921	PANCAN	19q	amp	cent	n	2	p-rn	0.95	42775930	47388577	0.474429	0.624984	0.187779	0	inf	0	16	3.00446	161
19	q13.2	MIR8077	NR_107044	42855282	42855357	0.477019	0.477022	PANCAN	19q	amp	cent	n	2	p-rn	0.95	42775930	47388577	0.474429	0.624984	0.187779	0	inf	0	16	3.00446	161
19	q13.2	CNFN	NM_032488	42891170	42894444	0.478191	0.478297	PANCAN	19q	amp	cent	n	2	p-rn	0.95	42775930	47388577	0.474429	0.624984	0.187779	0	inf	0	16	3.00446	161
19	q13.2	LOC101930071	NR_126041	42901279	42912604	0.478521	0.47889	PANCAN	19q	amp	cent	n	2	p-rn	0.95	42775930	47388577	0.474429	0.624984	0.187779	0	inf	0	16	3.00446	161
19	q13.2	LIPE-AS1	NR_073180	42901299	43156507	0.478521	0.486851	PANCAN	19q	amp	cent	n	2	p-rn	0.95	42775930	47388577	0.474429	0.624984	0.187779	0	inf	0	16	3.00446	161
19	q13.2	LIPE	NM_005357	42905658	42931578	0.478664	0.47951	PANCAN	19q	amp	cent	n	2	p-rn	0.95	42775930	47388577	0.474429	0.624984	0.187779	0	inf	0	16	3.00446	161
19	q13.2	CXCL17	NR_133910	42932689	42947200	0.479546	0.480019	PANCAN	19q	amp	cent	n	2	p-rn	0.95	42775930	47388577	0.474429	0.624984	0.187779	0	inf	0	16	3.00446	161
19	q13.2	CEACAM1	NM_001184815	43011457	43032661	0.482117	0.482809	PANCAN	19q	amp	cent	n	2	p-rn	0.95	42775930	47388577	0.474429	0.624984	0.187779	0	inf	0	16	3.00446	161
19	q13.2	CEACAM8	NM_001816	43084394	43099082	0.484497	0.484977	PANCAN	19q	amp	cent	n	2	p-rn	0.95	42775930	47388577	0.474429	0.624984	0.187779	0	inf	0	16	3.00446	161
19	q13.2	PSG3	NM_021016	43225793	43244668	0.489113	0.489729	PANCAN	19q	amp	cent	n	2	p-rn	0.95	42775930	47388577	0.474429	0.624984	0.187779	0	inf	0	16	3.00446	161
19	q13.2	PSG8	NM_001130167	43256838	43269831	0.490126	0.49055	PANCAN	19q	amp	cent	n	2	p-rn	0.95	42775930	47388577	0.474429	0.624984	0.187779	0	inf	0	16	3.00446	161
19	q13.2	PSG8-AS1	NR_036584	43326014	43331030	0.492384	0.492547	PANCAN	19q	amp	cent	n	2	p-rn	0.95	42775930	47388577	0.474429	0.624984	0.187779	0	inf	0	16	3.00446	161
19	q13.2	PSG10P	NR_026824	43341148	43359870	0.492878	0.493489	PANCAN	19q	amp	cent	n	2	p-rn	0.95	42775930	47388577	0.474429	0.624984	0.187779	0	inf	0	16	3.00446	161
19	q13.2	PSG1	NM_001330524	43370612	43383974	0.493839	0.494276	PANCAN	19q	amp	cent	n	2	p-rn	0.95	42775930	47388577	0.474429	0.624984	0.187779	0	inf	0	16	3.00446	161
19	q13.31	PSG6	NM_001031850	43406233	43422076	0.495002	0.495519	PANCAN	19q	amp	cent	n	2	p-rn	0.95	42775930	47388577	0.474429	0.624984	0.187779	0	inf	0	16	3.00446	161
19	q13.31	PSG7	NM_002783	43428283	43441330	0.495722	0.496148	PANCAN	19q	amp	cent	n	2	p-rn	0.95	42775930	47388577	0.474429	0.624984	0.187779	0	inf	0	16	3.00446	161
19	q13.31	PSG11	NM_002785	43511808	43530631	0.498448	0.499062	PANCAN	19q	amp	cent	n	2	p-rn	0.95	42775930	47388577	0.474429	0.624984	0.187779	0	inf	0	16	3.00446	161
19	q13.31	PSG2	NM_031246	43568361	43586893	0.500294	0.500899	PANCAN	19q	amp	cent	n	2	p-rn	0.95	42775930	47388577	0.474429	0.624984	0.187779	0	inf	0	16	3.00446	161
19	q13.31	PSG5	NM_002781	43671894	43690688	0.503673	0.504286	PANCAN	19q	amp	cent	n	2	p-rn	0.95	42775930	47388577	0.474429	0.624984	0.187779	0	inf	0	16	3.00446	161
19	q13.31	PSG4	NM_001276495	43696853	43709926	0.504488	0.504914	PANCAN	19q	amp	cent	n	2	p-rn	0.95	42775930	47388577	0.474429	0.624984	0.187779	0	inf	0	16	3.00446	161
19	q13.31	LOC284344	NR_033888	43715942	43752798	0.505111	0.506314	PANCAN	19q	amp	cent	n	2	p-rn	0.95	42775930	47388577	0.474429	0.624984	0.187779	0	inf	0	16	3.00446	161
19	q13.31	PSG9	NM_002784	43757433	43773715	0.506465	0.506996	PANCAN	19q	amp	cent	n	2	p-rn	0.95	42775930	47388577	0.474429	0.624984	0.187779	0	inf	0	16	3.00446	161
19	q13.31	PRG1	NR_026881	43853207	43853700	0.509591	0.509607	PANCAN	19q	amp	cent	n	2	p-rn	0.95	42775930	47388577	0.474429	0.624984	0.187779	0	inf	0	16	3.00446	161
19	q13.31	CD177	NM_020406	43857810	43867324	0.509741	0.510052	PANCAN	19q	amp	cent	n	2	p-rn	0.95	42775930	47388577	0.474429	0.624984	0.187779	0	inf	0	16	3.00446	161
19	q13.31	TEX101	NM_031451	43892762	43922767	0.510882	0.511861	PANCAN	19q	amp	cent	n	2	p-rn	0.95	42775930	47388577	0.474429	0.624984	0.187779	0	inf	0	16	3.00446	161
19	q13.31	LYPD3	NM_014400	43964945	43969831	0.513238	0.513398	PANCAN	19q	amp	cent	n	2	p-rn	0.95	42775930	47388577	0.474429	0.624984	0.187779	0	inf	0	16	3.00446	161
19	q13.31	PHLDB3	NM_198850	43979254	44008985	0.513705	0.514676	PANCAN	19q	amp	cent	n	2	p-rn	0.95	42775930	47388577	0.474429	0.624984	0.187779	0	inf	0	16	3.00446	161
19	q13.31	ETHE1	NM_001320869	44010870	44031408	0.514737	0.515407	PANCAN	19q	amp	cent	n	2	p-rn	0.95	42775930	47388577	0.474429	0.624984	0.187779	0	inf	0	16	3.00446	161
19	q13.31	ZNF575	NM_174945	44037339	44040284	0.515601	0.515697	PANCAN	19q	amp	cent	n	2	p-rn	0.95	42775930	47388577	0.474429	0.624984	0.187779	0	inf	0	16	3.00446	161
19	q13.31	XRCC1	NM_006297	44047463	44079730	0.515931	0.516985	PANCAN	19q	amp	cent	n	2	p-rn	0.95	42775930	47388577	0.474429	0.624984	0.187779	0	inf	0	16	3.00446	161
19	q13.31	PINLYP	NM_001193621	44080951	44086256	0.517024	0.517198	PANCAN	19q	amp	cent	n	2	p-rn	0.95	42775930	47388577	0.474429	0.624984	0.187779	0	inf	0	16	3.00446	161
19	q13.31	IRGQ	NM_001007561	44088518	44100287	0.517271	0.517656	PANCAN	19q	amp	cent	n	2	p-rn	0.95	42775930	47388577	0.474429	0.624984	0.187779	0	inf	0	16	3.00446	161
19	q13.31	ZNF576	NM_024327	44100543	44104587	0.517664	0.517796	PANCAN	19q	amp	cent	n	2	p-rn	0.95	42775930	47388577	0.474429	0.624984	0.187779	0	inf	0	16	3.00446	161
19	q13.31	ZNF428	NM_182498	44111375	44124014	0.518018	0.51843	PANCAN	19q	amp	cent	n	2	p-rn	0.95	42775930	47388577	0.474429	0.624984	0.187779	0	inf	0	16	3.00446	161
19	q13.31	SRRM5	NM_001145641	44116252	44118650	0.518177	0.518255	PANCAN	19q	amp	cent	n	2	p-rn	0.95	42775930	47388577	0.474429	0.624984	0.187779	0	inf	0	16	3.00446	161
19	q13.31	CADM4	NM_145296	44126521	44143991	0.518512	0.519082	PANCAN	19q	amp	cent	n	2	p-rn	0.95	42775930	47388577	0.474429	0.624984	0.187779	0	inf	0	16	3.00446	161
19	q13.31	PLAUR	NM_001005376	44150246	44174498	0.519286	0.520078	PANCAN	19q	amp	cent	n	2	p-rn	0.95	42775930	47388577	0.474429	0.624984	0.187779	0	inf	0	16	3.00446	161
19	q13.31	IRGC	NM_019612	44220213	44224169	0.52157	0.521699	PANCAN	19q	amp	cent	n	2	p-rn	0.95	42775930	47388577	0.474429	0.624984	0.187779	0	inf	0	16	3.00446	161
19	q13.31	SMG9	NM_019108	44232148	44259188	0.521959	0.522842	PANCAN	19q	amp	cent	n	2	p-rn	0.95	42775930	47388577	0.474429	0.624984	0.187779	0	inf	0	16	3.00446	161
19	q13.31	KCNN4	NM_002250	44270684	44285409	0.523217	0.523698	PANCAN	19q	amp	cent	n	2	p-rn	0.95	42775930	47388577	0.474429	0.624984	0.187779	0	inf	0	16	3.00446	161
19	q13.31	LYPD5	NM_182573	44300078	44324808	0.524177	0.524984	PANCAN	19q	amp	cent	n	2	p-rn	0.95	42775930	47388577	0.474429	0.624984	0.187779	0	inf	0	16	3.00446	161
19	q13.31	ZNF283	NM_001297752	44331443	44353050	0.5252	0.525906	PANCAN	19q	amp	cent	n	2	p-rn	0.95	42775930	47388577	0.474429	0.624984	0.187779	0	inf	0	16	3.00446	161
19	q13.31	ZNF404	NM_001033719	44376514	44384288	0.526672	0.526925	PANCAN	19q	amp	cent	n	2	p-rn	0.95	42775930	47388577	0.474429	0.624984	0.187779	0	inf	0	16	3.00446	161
19	q13.31	LOC100505715	NR_038334	44395955	44405955	0.527306	0.527632	PANCAN	19q	amp	cent	n	2	p-rn	0.95	42775930	47388577	0.474429	0.624984	0.187779	0	inf	0	16	3.00446	161
19	q13.31	ZNF45	NM_003425	44416775	44439411	0.527986	0.528724	PANCAN	19q	amp	cent	n	2	p-rn	0.95	42775930	47388577	0.474429	0.624984	0.187779	0	inf	0	16	3.00446	161
19	q13.31	ZNF221	NM_001297589	44455374	44471752	0.529245	0.52978	PANCAN	19q	amp	cent	n	2	p-rn	0.95	42775930	47388577	0.474429	0.624984	0.187779	0	inf	0	16	3.00446	161
19	q13.31	ZNF155	NM_001260487	44488321	44502477	0.530321	0.530783	PANCAN	19q	amp	cent	n	2	p-rn	0.95	42775930	47388577	0.474429	0.624984	0.187779	0	inf	0	16	3.00446	161
19	q13.31	LOC101928063	NR_110727	44501047	44507022	0.530736	0.530931	PANCAN	19q	amp	cent	n	2	p-rn	0.95	42775930	47388577	0.474429	0.624984	0.187779	0	inf	0	16	3.00446	161
19	q13.31	ZNF230	NM_006300	44507076	44518072	0.530933	0.531292	PANCAN	19q	amp	cent	n	2	p-rn	0.95	42775930	47388577	0.474429	0.624984	0.187779	0	inf	0	16	3.00446	161
19	q13.31	ZNF222	NM_013360	44529493	44537262	0.531665	0.531918	PANCAN	19q	amp	cent	n	2	p-rn	0.95	42775930	47388577	0.474429	0.624984	0.187779	0	inf	0	16	3.00446	161
19	q13.31	ZNF223	NM_013361	44556163	44572147	0.532535	0.533057	PANCAN	19q	amp	cent	n	2	p-rn	0.95	42775930	47388577	0.474429	0.624984	0.187779	0	inf	0	16	3.00446	161
19	q13.31	ZNF284	NM_001037813	44576296	44593766	0.533192	0.533763	PANCAN	19q	amp	cent	n	2	p-rn	0.95	42775930	47388577	0.474429	0.624984	0.187779	0	inf	0	16	3.00446	161
19	q13.31	ZNF224	NM_013398	44598481	44613983	0.533916	0.534422	PANCAN	19q	amp	cent	n	2	p-rn	0.95	42775930	47388577	0.474429	0.624984	0.187779	0	inf	0	16	3.00446	161
19	q13.31	LOC100379224	NR_033341	44609491	44617336	0.534276	0.534532	PANCAN	19q	amp	cent	n	2	p-rn	0.95	42775930	47388577	0.474429	0.624984	0.187779	0	inf	0	16	3.00446	161
19	q13.31	ZNF225	NM_013362	44617514	44638969	0.534538	0.535238	PANCAN	19q	amp	cent	n	2	p-rn	0.95	42775930	47388577	0.474429	0.624984	0.187779	0	inf	0	16	3.00446	161
19	q13.31	ZNF234	NM_006630	44645709	44664462	0.535458	0.53607	PANCAN	19q	amp	cent	n	2	p-rn	0.95	42775930	47388577	0.474429	0.624984	0.187779	0	inf	0	16	3.00446	161
19	q13.31	ZNF226	NM_001319090	44669214	44681838	0.536225	0.536637	PANCAN	19q	amp	cent	n	2	p-rn	0.95	42775930	47388577	0.474429	0.624984	0.187779	0	inf	0	16	3.00446	161
19	q13.31	ZNF227	NM_001289166	44716680	44741421	0.537774	0.538582	PANCAN	19q	amp	cent	n	2	p-rn	0.95	42775930	47388577	0.474429	0.624984	0.187779	0	inf	0	16	3.00446	161
19	q13.31	ZNF233	NM_001330529	44764032	44779470	0.53932	0.539824	PANCAN	19q	amp	cent	n	2	p-rn	0.95	42775930	47388577	0.474429	0.624984	0.187779	0	inf	0	16	3.00446	161
19	q13.31	ZNF235	NM_004234	44790500	44809178	0.540184	0.540793	PANCAN	19q	amp	cent	n	2	p-rn	0.95	42775930	47388577	0.474429	0.624984	0.187779	0	inf	0	16	3.00446	161
19	q13.31	ZNF112	NM_001348282	44830705	44871375	0.541496	0.542824	PANCAN	19q	amp	cent	n	2	p-rn	0.95	42775930	47388577	0.474429	0.624984	0.187779	0	inf	0	16	3.00446	161
19	q13.31	ZNF285	NM_152354	44889807	44905777	0.543425	0.543946	PANCAN	19q	amp	cent	n	2	p-rn	0.95	42775930	47388577	0.474429	0.624984	0.187779	0	inf	0	16	3.00446	161
19	q13.31	ZNF229	NM_001278510	44930422	44952766	0.544751	0.54548	PANCAN	19q	amp	cent	n	2	p-rn	0.95	42775930	47388577	0.474429	0.624984	0.187779	0	inf	0	16	3.00446	161
19	q13.31	ZNF180	NM_001278508	44978644	45004575	0.546325	0.547171	PANCAN	19q	amp	cent	n	2	p-rn	0.95	42775930	47388577	0.474429	0.624984	0.187779	0	inf	0	16	3.00446	161
19	q13.31	CEACAM20	NM_001102597	45010210	45033548	0.547355	0.548117	PANCAN	19q	amp	cent	n	2	p-rn	0.95	42775930	47388577	0.474429	0.624984	0.187779	0	inf	0	16	3.00446	161
19	q13.31	CEACAM22P	NR_027754	45041044	45060150	0.548361	0.548985	PANCAN	19q	amp	cent	n	2	p-rn	0.95	42775930	47388577	0.474429	0.624984	0.187779	0	inf	0	16	3.00446	161
19	q13.31	IGSF23	NM_001205280	45116939	45140081	0.550839	0.551594	PANCAN	19q	amp	cent	n	2	p-rn	0.95	42775930	47388577	0.474429	0.624984	0.187779	0	inf	0	16	3.00446	161
19	q13.31	PVR	NM_001135769	45147097	45169428	0.551823	0.552552	PANCAN	19q	amp	cent	n	2	p-rn	0.95	42775930	47388577	0.474429	0.624984	0.187779	0	inf	0	16	3.00446	161
19	q13.31	MIR4531	NR_039756	45156955	45157002	0.552145	0.552146	PANCAN	19q	amp	cent	n	2	p-rn	0.95	42775930	47388577	0.474429	0.624984	0.187779	0	inf	0	16	3.00446	161
19	q13.31	CEACAM19	NM_001127893	45174723	45187627	0.552725	0.553146	PANCAN	19q	amp	cent	n	2	p-rn	0.95	42775930	47388577	0.474429	0.624984	0.187779	0	inf	0	16	3.00446	161
19	q13.32	CEACAM16	NM_001039213	45202420	45213986	0.553629	0.554006	PANCAN	19q	amp	cent	n	2	p-rn	0.95	42775930	47388577	0.474429	0.624984	0.187779	0	inf	0	16	3.00446	161
19	q13.32	BCL3	NM_005178	45251977	45263301	0.555246	0.555616	PANCAN	19q	amp	cent	n	2	p-rn	0.95	42775930	47388577	0.474429	0.624984	0.187779	0	inf	0	16	3.00446	161
19	q13.32	MIR8085	NR_107052	45261913	45261978	0.55557	0.555573	PANCAN	19q	amp	cent	n	2	p-rn	0.95	42775930	47388577	0.474429	0.624984	0.187779	0	inf	0	16	3.00446	161
19	q13.32	CBLC	NM_012116	45281125	45303903	0.556198	0.556941	PANCAN	19q	amp	cent	n	2	p-rn	0.95	42775930	47388577	0.474429	0.624984	0.187779	0	inf	0	16	3.00446	161
19	q13.32	BCAM	NM_005581	45312315	45324678	0.557216	0.557619	PANCAN	19q	amp	cent	n	2	p-rn	0.95	42775930	47388577	0.474429	0.624984	0.187779	0	inf	0	16	3.00446	161
19	q13.32	NECTIN2	NM_001042724	45349392	45392485	0.558426	0.559832	PANCAN	19q	amp	cent	n	2	p-rn	0.95	42775930	47388577	0.474429	0.624984	0.187779	0	inf	0	16	3.00446	161
19	q13.32	TOMM40	NM_001128917	45394476	45406946	0.559897	0.560304	PANCAN	19q	amp	cent	n	2	p-rn	0.95	42775930	47388577	0.474429	0.624984	0.187779	0	inf	0	16	3.00446	161
19	q13.32	APOE	NM_001302691	45409005	45412652	0.560371	0.560491	PANCAN	19q	amp	cent	n	2	p-rn	0.95	42775930	47388577	0.474429	0.624984	0.187779	0	inf	0	16	3.00446	161
19	q13.32	APOC1	NM_001321066	45417503	45422606	0.560649	0.560815	PANCAN	19q	amp	cent	n	2	p-rn	0.95	42775930	47388577	0.474429	0.624984	0.187779	0	inf	0	16	3.00446	161
19	q13.32	APOC1P1	NR_028413	45430059	45434643	0.561059	0.561208	PANCAN	19q	amp	cent	n	2	p-rn	0.95	42775930	47388577	0.474429	0.624984	0.187779	0	inf	0	16	3.00446	161
19	q13.32	APOC4	NM_001646	45445494	45448753	0.561562	0.561669	PANCAN	19q	amp	cent	n	2	p-rn	0.95	42775930	47388577	0.474429	0.624984	0.187779	0	inf	0	16	3.00446	161
19	q13.32	APOC4-APOC2	NR_037932	45445494	45452822	0.561562	0.561802	PANCAN	19q	amp	cent	n	2	p-rn	0.95	42775930	47388577	0.474429	0.624984	0.187779	0	inf	0	16	3.00446	161
19	q13.32	APOC2	NM_000483	45449238	45452822	0.561685	0.561802	PANCAN	19q	amp	cent	n	2	p-rn	0.95	42775930	47388577	0.474429	0.624984	0.187779	0	inf	0	16	3.00446	161
19	q13.32	CLPTM1	NM_001282176	45457841	45496604	0.561965	0.563231	PANCAN	19q	amp	cent	n	2	p-rn	0.95	42775930	47388577	0.474429	0.624984	0.187779	0	inf	0	16	3.00446	161
19	q13.32	RELB	NM_006509	45504706	45541456	0.563495	0.564695	PANCAN	19q	amp	cent	n	2	p-rn	0.95	42775930	47388577	0.474429	0.624984	0.187779	0	inf	0	16	3.00446	161
19	q13.32	CLASRP	NM_001278439	45542297	45574214	0.564722	0.565764	PANCAN	19q	amp	cent	n	2	p-rn	0.95	42775930	47388577	0.474429	0.624984	0.187779	0	inf	0	16	3.00446	161
19	q13.32	ZNF296	NM_145288	45574757	45579846	0.565782	0.565948	PANCAN	19q	amp	cent	n	2	p-rn	0.95	42775930	47388577	0.474429	0.624984	0.187779	0	inf	0	16	3.00446	161
19	q13.32	GEMIN7	NM_001007270	45582517	45594782	0.566035	0.566435	PANCAN	19q	amp	cent	n	2	p-rn	0.95	42775930	47388577	0.474429	0.624984	0.187779	0	inf	0	16	3.00446	161
19	q13.32	GEMIN7-AS1	NR_134887	45588586	45593649	0.566233	0.566398	PANCAN	19q	amp	cent	n	2	p-rn	0.95	42775930	47388577	0.474429	0.624984	0.187779	0	inf	0	16	3.00446	161
19	q13.32	PPP1R37	NM_019121	45596430	45650543	0.566489	0.568255	PANCAN	19q	amp	cent	n	2	p-rn	0.95	42775930	47388577	0.474429	0.624984	0.187779	0	inf	0	16	3.00446	161
19	q13.32	NKPD1	NM_198478	45653007	45663408	0.568336	0.568675	PANCAN	19q	amp	cent	n	2	p-rn	0.95	42775930	47388577	0.474429	0.624984	0.187779	0	inf	0	16	3.00446	161
19	q13.32	TRAPPC6A	NM_001270893	45666185	45681501	0.568766	0.569266	PANCAN	19q	amp	cent	n	2	p-rn	0.95	42775930	47388577	0.474429	0.624984	0.187779	0	inf	0	16	3.00446	161
19	q13.32	BLOC1S3	NM_212550	45682002	45685059	0.569282	0.569382	PANCAN	19q	amp	cent	n	2	p-rn	0.95	42775930	47388577	0.474429	0.624984	0.187779	0	inf	0	16	3.00446	161
19	q13.32	EXOC3L2	NM_138568	45715634	45737469	0.57038	0.571092	PANCAN	19q	amp	cent	n	2	p-rn	0.95	42775930	47388577	0.474429	0.624984	0.187779	0	inf	0	16	3.00446	161
19	q13.32	MARK4	NM_001199867	45754515	45808541	0.571649	0.573412	PANCAN	19q	amp	cent	n	2	p-rn	0.95	42775930	47388577	0.474429	0.624984	0.187779	0	inf	0	16	3.00446	161
19	q13.32	CKM	NM_001824	45809670	45826235	0.573449	0.57399	PANCAN	19q	amp	cent	n	2	p-rn	0.95	42775930	47388577	0.474429	0.624984	0.187779	0	inf	0	16	3.00446	161
19	q13.32	KLC3	NM_177417	45843997	45854778	0.574569	0.574921	PANCAN	19q	amp	cent	n	2	p-rn	0.95	42775930	47388577	0.474429	0.624984	0.187779	0	inf	0	16	3.00446	161
19	q13.32	ERCC2	NM_000400	45854648	45873845	0.574917	0.575544	PANCAN	19q	amp	cent	n	2	p-rn	0.95	42775930	47388577	0.474429	0.624984	0.187779	0	inf	0	16	3.00446	161
19	q13.32	PPP1R13L	NM_001142502	45882891	45909607	0.575839	0.576711	PANCAN	19q	amp	cent	n	2	p-rn	0.95	42775930	47388577	0.474429	0.624984	0.187779	0	inf	0	16	3.00446	161
19	q13.32	CD3EAP	NM_001297590	45909466	45914024	0.576706	0.576855	PANCAN	19q	amp	cent	n	2	p-rn	0.95	42775930	47388577	0.474429	0.624984	0.187779	0	inf	0	16	3.00446	161
19	q13.32	ERCC1	NM_001983	45910590	45927177	0.576743	0.577284	PANCAN	19q	amp	cent	n	2	p-rn	0.95	42775930	47388577	0.474429	0.624984	0.187779	0	inf	0	16	3.00446	161
19	q13.32	MIR6088	NR_106736	45939911	45939962	0.5777	0.577702	PANCAN	19q	amp	cent	n	2	p-rn	0.95	42775930	47388577	0.474429	0.624984	0.187779	0	inf	0	16	3.00446	161
19	q13.32	FOSB	NM_006732	45971252	45978437	0.578723	0.578957	PANCAN	19q	amp	cent	n	2	p-rn	0.95	42775930	47388577	0.474429	0.624984	0.187779	0	inf	0	16	3.00446	161
19	q13.32	RTN2	NM_005619	45988545	46000313	0.579287	0.579671	PANCAN	19q	amp	cent	n	2	p-rn	0.95	42775930	47388577	0.474429	0.624984	0.187779	0	inf	0	16	3.00446	161
19	q13.32	PPM1N	NM_001080401	46001730	46005764	0.579718	0.579849	PANCAN	19q	amp	cent	n	2	p-rn	0.95	42775930	47388577	0.474429	0.624984	0.187779	0	inf	0	16	3.00446	161
19	q13.32	VASP	NM_003370	46010687	46030240	0.58001	0.580648	PANCAN	19q	amp	cent	n	2	p-rn	0.95	42775930	47388577	0.474429	0.624984	0.187779	0	inf	0	16	3.00446	161
19	q13.32	OPA3	NM_001017989	46031024	46088122	0.580674	0.582538	PANCAN	19q	amp	cent	n	2	p-rn	0.95	42775930	47388577	0.474429	0.624984	0.187779	0	inf	0	16	3.00446	161
19	q13.32	GPR4	NM_005282	46093022	46105466	0.582697	0.583104	PANCAN	19q	amp	cent	n	2	p-rn	0.95	42775930	47388577	0.474429	0.624984	0.187779	0	inf	0	16	3.00446	161
19	q13.32	EML2	NM_001352052	46112657	46148887	0.583338	0.584521	PANCAN	19q	amp	cent	n	2	p-rn	0.95	42775930	47388577	0.474429	0.624984	0.187779	0	inf	0	16	3.00446	161
19	q13.32	MIR330	NR_029886	46142251	46142345	0.584304	0.584307	PANCAN	19q	amp	cent	n	2	p-rn	0.95	42775930	47388577	0.474429	0.624984	0.187779	0	inf	0	16	3.00446	161
19	q13.32	EML2-AS1	NR_130728	46144751	46146092	0.584386	0.58443	PANCAN	19q	amp	cent	n	2	p-rn	0.95	42775930	47388577	0.474429	0.624984	0.187779	0	inf	0	16	3.00446	161
19	q13.32	GIPR	NM_001308418	46171501	46186982	0.585259	0.585764	PANCAN	19q	amp	cent	n	2	p-rn	0.95	42775930	47388577	0.474429	0.624984	0.187779	0	inf	0	16	3.00446	161
19	q13.32	MIR642A	NR_030372	46178185	46178282	0.585477	0.58548	PANCAN	19q	amp	cent	n	2	p-rn	0.95	42775930	47388577	0.474429	0.624984	0.187779	0	inf	0	16	3.00446	161
19	q13.32	MIR642B	NR_037512	46178189	46178266	0.585477	0.58548	PANCAN	19q	amp	cent	n	2	p-rn	0.95	42775930	47388577	0.474429	0.624984	0.187779	0	inf	0	16	3.00446	161
19	q13.32	SNRPD2	NM_004597	46190711	46195574	0.585886	0.586045	PANCAN	19q	amp	cent	n	2	p-rn	0.95	42775930	47388577	0.474429	0.624984	0.187779	0	inf	0	16	3.00446	161
19	q13.32	QPCTL	NM_001163377	46195740	46207248	0.58605	0.586426	PANCAN	19q	amp	cent	n	2	p-rn	0.95	42775930	47388577	0.474429	0.624984	0.187779	0	inf	0	16	3.00446	161
19	q13.32	FBXO46	NM_001329633	46213886	46236429	0.586642	0.587378	PANCAN	19q	amp	cent	n	2	p-rn	0.95	42775930	47388577	0.474429	0.624984	0.187779	0	inf	0	16	3.00446	161
19	q13.32	BHMG1	NM_001310124	46236508	46267797	0.587381	0.588402	PANCAN	19q	amp	cent	n	2	p-rn	0.95	42775930	47388577	0.474429	0.624984	0.187779	0	inf	0	16	3.00446	161
19	q13.32	SIX5	NM_175875	46268042	46272497	0.58841	0.588555	PANCAN	19q	amp	cent	n	2	p-rn	0.95	42775930	47388577	0.474429	0.624984	0.187779	0	inf	0	16	3.00446	161
19	q13.32	DM1-AS	NR_147193	46271053	46275141	0.588508	0.588642	PANCAN	19q	amp	cent	n	2	p-rn	0.95	42775930	47388577	0.474429	0.624984	0.187779	0	inf	0	16	3.00446	161
19	q13.32	DMPK	NM_001081560	46272966	46285815	0.588571	0.58899	PANCAN	19q	amp	cent	n	2	p-rn	0.95	42775930	47388577	0.474429	0.624984	0.187779	0	inf	0	16	3.00446	161
19	q13.32	DMWD	NM_004943	46286263	46296060	0.589005	0.589325	PANCAN	19q	amp	cent	n	2	p-rn	0.95	42775930	47388577	0.474429	0.624984	0.187779	0	inf	0	16	3.00446	161
19	q13.32	RSPH6A	NM_030785	46298967	46318605	0.589419	0.59006	PANCAN	19q	amp	cent	n	2	p-rn	0.95	42775930	47388577	0.474429	0.624984	0.187779	0	inf	0	16	3.00446	161
19	q13.32	SYMPK	NM_004819	46318699	46366548	0.590063	0.591625	PANCAN	19q	amp	cent	n	2	p-rn	0.95	42775930	47388577	0.474429	0.624984	0.187779	0	inf	0	16	3.00446	161
19	q13.32	FOXA3	NM_004497	46367517	46377055	0.591657	0.591968	PANCAN	19q	amp	cent	n	2	p-rn	0.95	42775930	47388577	0.474429	0.624984	0.187779	0	inf	0	16	3.00446	161
19	q13.32	IRF2BP1	NM_015649	46386864	46389428	0.592288	0.592372	PANCAN	19q	amp	cent	n	2	p-rn	0.95	42775930	47388577	0.474429	0.624984	0.187779	0	inf	0	16	3.00446	161
19	q13.32	MYPOP	NM_001012643	46393280	46405862	0.592498	0.592908	PANCAN	19q	amp	cent	n	2	p-rn	0.95	42775930	47388577	0.474429	0.624984	0.187779	0	inf	0	16	3.00446	161
19	q13.32	NANOS2	NM_001029861	46416472	46418036	0.593255	0.593306	PANCAN	19q	amp	cent	n	2	p-rn	0.95	42775930	47388577	0.474429	0.624984	0.187779	0	inf	0	16	3.00446	161
19	q13.32	NOVA2	NM_002516	46436991	46476657	0.593924	0.595219	PANCAN	19q	amp	cent	n	2	p-rn	0.95	42775930	47388577	0.474429	0.624984	0.187779	0	inf	0	16	3.00446	161
19	q13.32	CCDC61	NM_001267723	46498718	46521874	0.595939	0.596695	PANCAN	19q	amp	cent	n	2	p-rn	0.95	42775930	47388577	0.474429	0.624984	0.187779	0	inf	0	16	3.00446	161
19	q13.32	MIR769	NR_030412	46522189	46522307	0.596705	0.596709	PANCAN	19q	amp	cent	n	2	p-rn	0.95	42775930	47388577	0.474429	0.624984	0.187779	0	inf	0	16	3.00446	161
19	q13.32	PGLYRP1	NM_005091	46522411	46526556	0.596712	0.596848	PANCAN	19q	amp	cent	n	2	p-rn	0.95	42775930	47388577	0.474429	0.624984	0.187779	0	inf	0	16	3.00446	161
19	q13.32	IGFL4	NM_001002923	46543005	46544274	0.597385	0.597426	PANCAN	19q	amp	cent	n	2	p-rn	0.95	42775930	47388577	0.474429	0.624984	0.187779	0	inf	0	16	3.00446	161
19	q13.32	LOC400706	NR_125344	46560935	46580887	0.59797	0.598621	PANCAN	19q	amp	cent	n	2	p-rn	0.95	42775930	47388577	0.474429	0.624984	0.187779	0	inf	0	16	3.00446	161
19	q13.32	IGFL3	NM_207393	46623327	46627931	0.600006	0.600157	PANCAN	19q	amp	cent	n	2	p-rn	0.95	42775930	47388577	0.474429	0.624984	0.187779	0	inf	0	16	3.00446	161
19	q13.32	IGFL2	NM_001002915	46651038	46664561	0.600911	0.601352	PANCAN	19q	amp	cent	n	2	p-rn	0.95	42775930	47388577	0.474429	0.624984	0.187779	0	inf	0	16	3.00446	161
19	q13.32	IGFL2-AS1	NR_135234	46692285	46706319	0.602257	0.602715	PANCAN	19q	amp	cent	n	2	p-rn	0.95	42775930	47388577	0.474429	0.624984	0.187779	0	inf	0	16	3.00446	161
19	q13.32	LOC93429	NR_027003	46713498	46718094	0.602949	0.603099	PANCAN	19q	amp	cent	n	2	p-rn	0.95	42775930	47388577	0.474429	0.624984	0.187779	0	inf	0	16	3.00446	161
19	q13.32	IGFL1	NM_198541	46733008	46734500	0.603586	0.603635	PANCAN	19q	amp	cent	n	2	p-rn	0.95	42775930	47388577	0.474429	0.624984	0.187779	0	inf	0	16	3.00446	161
19	q13.32	HIF3A	NM_152795	46800302	46846690	0.605783	0.607297	PANCAN	19q	amp	cent	n	2	p-rn	0.95	42775930	47388577	0.474429	0.624984	0.187779	0	inf	0	16	3.00446	161
19	q13.32	PPP5C	NM_001204284	46850250	46894232	0.607413	0.608849	PANCAN	19q	amp	cent	n	2	p-rn	0.95	42775930	47388577	0.474429	0.624984	0.187779	0	inf	0	16	3.00446	161
19	q13.32	CCDC8	NM_032040	46913585	46916919	0.60948	0.609589	PANCAN	19q	amp	cent	n	2	p-rn	0.95	42775930	47388577	0.474429	0.624984	0.187779	0	inf	0	16	3.00446	161
19	q13.32	PNMA8A	NM_018215	46969747	46974820	0.611313	0.611479	PANCAN	19q	amp	cent	n	2	p-rn	0.95	42775930	47388577	0.474429	0.624984	0.187779	0	inf	0	16	3.00446	161
19	q13.32	PPP5D1	NM_001205281	46984044	47104457	0.61178	0.61571	PANCAN	19q	amp	cent	n	2	p-rn	0.95	42775930	47388577	0.474429	0.624984	0.187779	0	inf	0	16	3.00446	161
19	q13.32	PNMA8B	NM_020709	46994447	46999169	0.61212	0.612274	PANCAN	19q	amp	cent	n	2	p-rn	0.95	42775930	47388577	0.474429	0.624984	0.187779	0	inf	0	16	3.00446	161
19	q13.32	CALM3	NM_001329921	47104330	47114039	0.615706	0.616023	PANCAN	19q	amp	cent	n	2	p-rn	0.95	42775930	47388577	0.474429	0.624984	0.187779	0	inf	0	16	3.00446	161
19	q13.32	PTGIR	NM_000960	47123724	47128354	0.616339	0.61649	PANCAN	19q	amp	cent	n	2	p-rn	0.95	42775930	47388577	0.474429	0.624984	0.187779	0	inf	0	16	3.00446	161
19	q13.32	GNG8	NM_033258	47137332	47137939	0.616783	0.616803	PANCAN	19q	amp	cent	n	2	p-rn	0.95	42775930	47388577	0.474429	0.624984	0.187779	0	inf	0	16	3.00446	161
19	q13.32	DACT3	NM_145056	47150868	47164395	0.617225	0.617667	PANCAN	19q	amp	cent	n	2	p-rn	0.95	42775930	47388577	0.474429	0.624984	0.187779	0	inf	0	16	3.00446	161
19	q13.32	DACT3-AS1	NR_040042	47163620	47180713	0.617641	0.618199	PANCAN	19q	amp	cent	n	2	p-rn	0.95	42775930	47388577	0.474429	0.624984	0.187779	0	inf	0	16	3.00446	161
19	q13.32	PRKD2	NM_016457	47177572	47220384	0.618097	0.619494	PANCAN	19q	amp	cent	n	2	p-rn	0.95	42775930	47388577	0.474429	0.624984	0.187779	0	inf	0	16	3.00446	161
19	q13.32	MIR320E	NR_036157	47212549	47212602	0.619238	0.61924	PANCAN	19q	amp	cent	n	2	p-rn	0.95	42775930	47388577	0.474429	0.624984	0.187779	0	inf	0	16	3.00446	161
19	q13.32	STRN4	NM_013403	47222767	47249720	0.619572	0.620451	PANCAN	19q	amp	cent	n	2	p-rn	0.95	42775930	47388577	0.474429	0.624984	0.187779	0	inf	0	16	3.00446	161
19	q13.32	FKRP	NM_024301	47249302	47261832	0.620438	0.620847	PANCAN	19q	amp	cent	n	2	p-rn	0.95	42775930	47388577	0.474429	0.624984	0.187779	0	inf	0	16	3.00446	161
19	q13.32	SLC1A5	NM_005628	47278139	47291842	0.621379	0.621826	PANCAN	19q	amp	cent	n	2	p-rn	0.95	42775930	47388577	0.474429	0.624984	0.187779	0	inf	0	16	3.00446	161
19	q13.32	SNAR-E	NR_024258	47333841	47333961	0.623197	0.623201	PANCAN	19q	amp	cent	n	2	p-rn	0.95	42775930	47388577	0.474429	0.624984	0.187779	0	inf	0	16	3.00446	161
19	q13.32	AP2S1	NM_001301078	47341414	47354252	0.623444	0.623863	PANCAN	19q	amp	cent	n	2	p-rn	0.95	42775930	47388577	0.474429	0.624984	0.187779	0	inf	0	16	3.00446	161
2	p22.2	ATL2	NM_001330462	38521098	38605726	0.570915	0.569961	PANCAN	2p	amp	cent	p	1	p	0.95	38546917	66911894	0.250646	0.570624	0.222531	1.11022e-16	15.9546	4.65574e-14	13.332	2.96678	179
2	p22.1	LINC01883	NR_146454	38658435	38660715	0.569366	0.56934	PANCAN	2p	amp	cent	p	1	p	0.95	38546917	66911894	0.250646	0.570624	0.222531	1.11022e-16	15.9546	4.65574e-14	13.332	2.96678	179
2	p22.1	LOC101929596	NR_110259	38685779	38742882	0.569058	0.568413	PANCAN	2p	amp	cent	p	1	p	0.95	38546917	66911894	0.250646	0.570624	0.222531	1.11022e-16	15.9546	4.65574e-14	13.332	2.96678	179
2	p22.1	HNRNPLL	NM_001142650	38790327	38830178	0.567878	0.567429	PANCAN	2p	amp	cent	p	1	p	0.95	38546917	66911894	0.250646	0.570624	0.222531	1.11022e-16	15.9546	4.65574e-14	13.332	2.96678	179
2	p22.1	GALM	NM_138801	38893051	38961909	0.566719	0.565943	PANCAN	2p	amp	cent	p	1	p	0.95	38546917	66911894	0.250646	0.570624	0.222531	1.11022e-16	15.9546	4.65574e-14	13.332	2.96678	179
2	p22.1	SRSF7	NM_001195446	38970740	38978636	0.565843	0.565754	PANCAN	2p	amp	cent	p	1	p	0.95	38546917	66911894	0.250646	0.570624	0.222531	1.11022e-16	15.9546	4.65574e-14	13.332	2.96678	179
2	p22.1	GEMIN6	NM_024775	39005326	39009106	0.565453	0.56541	PANCAN	2p	amp	cent	p	1	p	0.95	38546917	66911894	0.250646	0.570624	0.222531	1.11022e-16	15.9546	4.65574e-14	13.332	2.96678	179
2	p22.1	DHX57	NM_001329963	39024875	39103075	0.565232	0.56435	PANCAN	2p	amp	cent	p	1	p	0.95	38546917	66911894	0.250646	0.570624	0.222531	1.11022e-16	15.9546	4.65574e-14	13.332	2.96678	179
2	p22.1	MORN2	NM_001145450	39103102	39109850	0.56435	0.564274	PANCAN	2p	amp	cent	p	1	p	0.95	38546917	66911894	0.250646	0.570624	0.222531	1.11022e-16	15.9546	4.65574e-14	13.332	2.96678	179
2	p22.1	ARHGEF33	NM_001145451	39146503	39202590	0.56386	0.563227	PANCAN	2p	amp	cent	p	1	p	0.95	38546917	66911894	0.250646	0.570624	0.222531	1.11022e-16	15.9546	4.65574e-14	13.332	2.96678	179
2	p22.1	LOC375196	NR_028386	39186428	39187485	0.56341	0.563398	PANCAN	2p	amp	cent	p	1	p	0.95	38546917	66911894	0.250646	0.570624	0.222531	1.11022e-16	15.9546	4.65574e-14	13.332	2.96678	179
2	p22.1	SOS1	NM_005633	39208689	39347604	0.563159	0.561592	PANCAN	2p	amp	cent	p	1	p	0.95	38546917	66911894	0.250646	0.570624	0.222531	1.11022e-16	15.9546	4.65574e-14	13.332	2.96678	179
2	p22.1	CDKL4	NR_144521	39395185	39471124	0.561055	0.560198	PANCAN	2p	amp	cent	p	1	p	0.95	38546917	66911894	0.250646	0.570624	0.222531	1.11022e-16	15.9546	4.65574e-14	13.332	2.96678	179
2	p22.1	MAP4K3	NM_003618	39476406	39664453	0.560139	0.558017	PANCAN	2p	amp	cent	p	1	p	0.95	38546917	66911894	0.250646	0.570624	0.222531	1.11022e-16	15.9546	4.65574e-14	13.332	2.96678	179
2	p22.1	LOC728730	NR_037875	39664556	39828484	0.558016	0.556167	PANCAN	2p	amp	cent	p	1	p	0.95	38546917	66911894	0.250646	0.570624	0.222531	1.11022e-16	15.9546	4.65574e-14	13.332	2.96678	179
2	p22.1	TMEM178A	NM_001167959	39892637	39945104	0.555443	0.554851	PANCAN	2p	amp	cent	p	1	p	0.95	38546917	66911894	0.250646	0.570624	0.222531	1.11022e-16	15.9546	4.65574e-14	13.332	2.96678	179
2	p22.1	THUMPD2	NM_001321478	39963199	40006416	0.554647	0.55416	PANCAN	2p	amp	cent	p	1	p	0.95	38546917	66911894	0.250646	0.570624	0.222531	1.11022e-16	15.9546	4.65574e-14	13.332	2.96678	179
2	p22.1	SLC8A1-AS1	NR_038441	40144773	40482349	0.552599	0.548791	PANCAN	2p	amp	cent	p	1	p	0.95	38546917	66911894	0.250646	0.570624	0.222531	1.11022e-16	15.9546	4.65574e-14	13.332	2.96678	179
2	p22.1	SLC8A1	NM_001112802	40339285	40739575	0.550405	0.545889	PANCAN	2p	amp	cent	p	1	p	0.95	38546917	66911894	0.250646	0.570624	0.222531	1.11022e-16	15.9546	4.65574e-14	13.332	2.96678	179
2	p21	LINC01913	NR_033996	42104694	42121186	0.53049	0.530304	PANCAN	2p	amp	cent	p	1	p	0.95	38546917	66911894	0.250646	0.570624	0.222531	1.11022e-16	15.9546	4.65574e-14	13.332	2.96678	179
2	p21	LINC01914	NR_110262	42158738	42160863	0.52988	0.529856	PANCAN	2p	amp	cent	p	1	p	0.95	38546917	66911894	0.250646	0.570624	0.222531	1.11022e-16	15.9546	4.65574e-14	13.332	2.96678	179
2	p21	C2orf91	NM_001242815	42162507	42180943	0.529837	0.529629	PANCAN	2p	amp	cent	p	1	p	0.95	38546917	66911894	0.250646	0.570624	0.222531	1.11022e-16	15.9546	4.65574e-14	13.332	2.96678	179
2	p21	PKDCC	NM_138370	42275160	42285668	0.528567	0.528448	PANCAN	2p	amp	cent	p	1	p	0.95	38546917	66911894	0.250646	0.570624	0.222531	1.11022e-16	15.9546	4.65574e-14	13.332	2.96678	179
2	p21	LOC102723824	NR_110584	42369574	42397371	0.527502	0.527188	PANCAN	2p	amp	cent	p	1	p	0.95	38546917	66911894	0.250646	0.570624	0.222531	1.11022e-16	15.9546	4.65574e-14	13.332	2.96678	179
2	p21	EML4	NM_019063	42396477	42559688	0.527198	0.525357	PANCAN	2p	amp	cent	p	1	p	0.95	38546917	66911894	0.250646	0.570624	0.222531	1.11022e-16	15.9546	4.65574e-14	13.332	2.96678	179
2	p21	COX7A2L	NM_001319038	42562700	42588383	0.525323	0.525033	PANCAN	2p	amp	cent	p	1	p	0.95	38546917	66911894	0.250646	0.570624	0.222531	1.11022e-16	15.9546	4.65574e-14	13.332	2.96678	179
2	p21	KCNG3	NM_172344	42669156	42721237	0.524122	0.523534	PANCAN	2p	amp	cent	p	1	p	0.95	38546917	66911894	0.250646	0.570624	0.222531	1.11022e-16	15.9546	4.65574e-14	13.332	2.96678	179
2	p21	MTA3	NM_001282755	42721708	42984087	0.523529	0.520569	PANCAN	2p	amp	cent	p	1	p	0.95	38546917	66911894	0.250646	0.570624	0.222531	1.11022e-16	15.9546	4.65574e-14	13.332	2.96678	179
2	p21	OXER1	NM_148962	42989638	42991401	0.520507	0.520487	PANCAN	2p	amp	cent	p	1	p	0.95	38546917	66911894	0.250646	0.570624	0.222531	1.11022e-16	15.9546	4.65574e-14	13.332	2.96678	179
2	p21	HAAO	NM_012205	42994228	43019751	0.520455	0.520167	PANCAN	2p	amp	cent	p	1	p	0.95	38546917	66911894	0.250646	0.570624	0.222531	1.11022e-16	15.9546	4.65574e-14	13.332	2.96678	179
2	p21	LINC01819	NR_110585	43254991	43266682	0.517513	0.517381	PANCAN	2p	amp	cent	p	1	p	0.95	38546917	66911894	0.250646	0.570624	0.222531	1.11022e-16	15.9546	4.65574e-14	13.332	2.96678	179
2	p21	LINC02580	NR_151714	43324883	43329583	0.516725	0.516672	PANCAN	2p	amp	cent	p	1	p	0.95	38546917	66911894	0.250646	0.570624	0.222531	1.11022e-16	15.9546	4.65574e-14	13.332	2.96678	179
2	p21	ZFP36L2	NM_006887	43449540	43453745	0.515319	0.515271	PANCAN	2p	amp	cent	p	1	p	0.95	38546917	66911894	0.250646	0.570624	0.222531	1.11022e-16	15.9546	4.65574e-14	13.332	2.96678	179
2	p21	LINC01126	NR_027251	43454349	43455994	0.515264	0.515246	PANCAN	2p	amp	cent	p	1	p	0.95	38546917	66911894	0.250646	0.570624	0.222531	1.11022e-16	15.9546	4.65574e-14	13.332	2.96678	179
2	p21	THADA	NM_001345925	43457974	43823185	0.515224	0.511104	PANCAN	2p	amp	cent	p	1	p	0.95	38546917	66911894	0.250646	0.570624	0.222531	1.11022e-16	15.9546	4.65574e-14	13.332	2.96678	179
2	p21	PLEKHH2	NM_172069	43864438	43995126	0.510638	0.509164	PANCAN	2p	amp	cent	p	1	p	0.95	38546917	66911894	0.250646	0.570624	0.222531	1.11022e-16	15.9546	4.65574e-14	13.332	2.96678	179
2	p21	C1GALT1C1L	NM_001101330	43902291	43903461	0.510211	0.510198	PANCAN	2p	amp	cent	p	1	p	0.95	38546917	66911894	0.250646	0.570624	0.222531	1.11022e-16	15.9546	4.65574e-14	13.332	2.96678	179
2	p21	DYNC2LI1	NM_001348912	44001177	44055458	0.509096	0.508483	PANCAN	2p	amp	cent	p	1	p	0.95	38546917	66911894	0.250646	0.570624	0.222531	1.11022e-16	15.9546	4.65574e-14	13.332	2.96678	179
2	p21	ABCG5	NM_022436	44039610	44065958	0.508662	0.508365	PANCAN	2p	amp	cent	p	1	p	0.95	38546917	66911894	0.250646	0.570624	0.222531	1.11022e-16	15.9546	4.65574e-14	13.332	2.96678	179
2	p21	ABCG8	NM_001357321	44066102	44105605	0.508363	0.507918	PANCAN	2p	amp	cent	p	1	p	0.95	38546917	66911894	0.250646	0.570624	0.222531	1.11022e-16	15.9546	4.65574e-14	13.332	2.96678	179
2	p21	LRPPRC	NM_133259	44113362	44223144	0.50783	0.506592	PANCAN	2p	amp	cent	p	1	p	0.95	38546917	66911894	0.250646	0.570624	0.222531	1.11022e-16	15.9546	4.65574e-14	13.332	2.96678	179
2	p21	PPM1B	NM_177968	44395941	44461742	0.504643	0.5039	PANCAN	2p	amp	cent	p	1	p	0.95	38546917	66911894	0.250646	0.570624	0.222531	1.11022e-16	15.9546	4.65574e-14	13.332	2.96678	179
2	p21	SLC3A1	NM_000341	44502596	44547962	0.503439	0.502928	PANCAN	2p	amp	cent	p	1	p	0.95	38546917	66911894	0.250646	0.570624	0.222531	1.11022e-16	15.9546	4.65574e-14	13.332	2.96678	179
2	p21	PREPL	NM_001171617	44544747	44589001	0.502964	0.502465	PANCAN	2p	amp	cent	p	1	p	0.95	38546917	66911894	0.250646	0.570624	0.222531	1.11022e-16	15.9546	4.65574e-14	13.332	2.96678	179
2	p21	CAMKMT	NM_024766	44589042	44999731	0.502464	0.497831	PANCAN	2p	amp	cent	p	1	p	0.95	38546917	66911894	0.250646	0.570624	0.222531	1.11022e-16	15.9546	4.65574e-14	13.332	2.96678	179
2	p21	LINC01833	NR_147195	45148218	45166338	0.496156	0.495952	PANCAN	2p	amp	cent	p	1	p	0.95	38546917	66911894	0.250646	0.570624	0.222531	1.11022e-16	15.9546	4.65574e-14	13.332	2.96678	179
2	p21	SIX3-AS1	NR_103786	45167292	45169017	0.495941	0.495922	PANCAN	2p	amp	cent	p	1	p	0.95	38546917	66911894	0.250646	0.570624	0.222531	1.11022e-16	15.9546	4.65574e-14	13.332	2.96678	179
2	p21	SIX3	NM_005413	45169036	45173216	0.495921	0.495874	PANCAN	2p	amp	cent	p	1	p	0.95	38546917	66911894	0.250646	0.570624	0.222531	1.11022e-16	15.9546	4.65574e-14	13.332	2.96678	179
2	p21	SIX2	NM_016932	45232323	45236542	0.495208	0.49516	PANCAN	2p	amp	cent	p	1	p	0.95	38546917	66911894	0.250646	0.570624	0.222531	1.11022e-16	15.9546	4.65574e-14	13.332	2.96678	179
2	p21	LINC01121	NR_033831	45401479	45482080	0.493299	0.49239	PANCAN	2p	amp	cent	p	1	p	0.95	38546917	66911894	0.250646	0.570624	0.222531	1.11022e-16	15.9546	4.65574e-14	13.332	2.96678	179
2	p21	SRBD1	NM_018079	45615818	45838433	0.490881	0.48837	PANCAN	2p	amp	cent	p	1	p	0.95	38546917	66911894	0.250646	0.570624	0.222531	1.11022e-16	15.9546	4.65574e-14	13.332	2.96678	179
2	p21	PRKCE	NM_005400	45879042	46415129	0.487912	0.481865	PANCAN	2p	amp	cent	p	1	p	0.95	38546917	66911894	0.250646	0.570624	0.222531	1.11022e-16	15.9546	4.65574e-14	13.332	2.96678	179
2	p21	EPAS1	NM_001430	46524540	46613842	0.48063	0.479623	PANCAN	2p	amp	cent	p	1	p	0.95	38546917	66911894	0.250646	0.570624	0.222531	1.11022e-16	15.9546	4.65574e-14	13.332	2.96678	179
2	p21	LINC01820	NR_146999	46619431	46621306	0.47956	0.479539	PANCAN	2p	amp	cent	p	1	p	0.95	38546917	66911894	0.250646	0.570624	0.222531	1.11022e-16	15.9546	4.65574e-14	13.332	2.96678	179
2	p21	LOC101805491	NR_103805	46656328	46668972	0.479144	0.479001	PANCAN	2p	amp	cent	p	1	p	0.95	38546917	66911894	0.250646	0.570624	0.222531	1.11022e-16	15.9546	4.65574e-14	13.332	2.96678	179
2	p21	TMEM247	NM_001145051	46706703	46711564	0.478575	0.478521	PANCAN	2p	amp	cent	p	1	p	0.95	38546917	66911894	0.250646	0.570624	0.222531	1.11022e-16	15.9546	4.65574e-14	13.332	2.96678	179
2	p21	ATP6V1E2	NM_001318063	46738973	46769696	0.478211	0.477865	PANCAN	2p	amp	cent	p	1	p	0.95	38546917	66911894	0.250646	0.570624	0.222531	1.11022e-16	15.9546	4.65574e-14	13.332	2.96678	179
2	p21	RHOQ	NM_012249	46769866	46811827	0.477863	0.47739	PANCAN	2p	amp	cent	p	1	p	0.95	38546917	66911894	0.250646	0.570624	0.222531	1.11022e-16	15.9546	4.65574e-14	13.332	2.96678	179
2	p21	LOC100506142	NR_104182	46795395	46807377	0.477575	0.47744	PANCAN	2p	amp	cent	p	1	p	0.95	38546917	66911894	0.250646	0.570624	0.222531	1.11022e-16	15.9546	4.65574e-14	13.332	2.96678	179
2	p21	PIGF	NM_002643	46808412	46844251	0.477428	0.477024	PANCAN	2p	amp	cent	p	1	p	0.95	38546917	66911894	0.250646	0.570624	0.222531	1.11022e-16	15.9546	4.65574e-14	13.332	2.96678	179
2	p21	CRIPT	NM_014171	46844310	46857315	0.477023	0.476876	PANCAN	2p	amp	cent	p	1	p	0.95	38546917	66911894	0.250646	0.570624	0.222531	1.11022e-16	15.9546	4.65574e-14	13.332	2.96678	179
2	p21	SOCS5	NM_014011	46926098	46989927	0.4761	0.47538	PANCAN	2p	amp	cent	p	1	p	0.95	38546917	66911894	0.250646	0.570624	0.222531	1.11022e-16	15.9546	4.65574e-14	13.332	2.96678	179
2	p21	LINC01118	NR_034099	47043806	47049799	0.474773	0.474705	PANCAN	2p	amp	cent	p	1	p	0.95	38546917	66911894	0.250646	0.570624	0.222531	1.11022e-16	15.9546	4.65574e-14	13.332	2.96678	179
2	p21	LINC01119	NR_024452	47055002	47086145	0.474646	0.474295	PANCAN	2p	amp	cent	p	1	p	0.95	38546917	66911894	0.250646	0.570624	0.222531	1.11022e-16	15.9546	4.65574e-14	13.332	2.96678	179
2	p21	MCFD2	NM_001171511	47129008	47168994	0.473811	0.47336	PANCAN	2p	amp	cent	p	1	p	0.95	38546917	66911894	0.250646	0.570624	0.222531	1.11022e-16	15.9546	4.65574e-14	13.332	2.96678	179
2	p21	TTC7A	NM_001288953	47143267	47303275	0.473651	0.471846	PANCAN	2p	amp	cent	p	1	p	0.95	38546917	66911894	0.250646	0.570624	0.222531	1.11022e-16	15.9546	4.65574e-14	13.332	2.96678	179
2	p21	STPG4	NM_001163561	47314129	47382517	0.471723	0.470952	PANCAN	2p	amp	cent	p	1	p	0.95	38546917	66911894	0.250646	0.570624	0.222531	1.11022e-16	15.9546	4.65574e-14	13.332	2.96678	179
2	p21	CALM2	NM_001305625	47387220	47404075	0.470899	0.470709	PANCAN	2p	amp	cent	p	1	p	0.95	38546917	66911894	0.250646	0.570624	0.222531	1.11022e-16	15.9546	4.65574e-14	13.332	2.96678	179
2	p21	LOC101927043	NR_110208	47419543	47572213	0.470534	0.468812	PANCAN	2p	amp	cent	p	1	p	0.95	38546917	66911894	0.250646	0.570624	0.222531	1.11022e-16	15.9546	4.65574e-14	13.332	2.96678	179
2	p21	EPCAM	NM_002354	47596286	47614167	0.46854	0.468339	PANCAN	2p	amp	cent	p	1	p	0.95	38546917	66911894	0.250646	0.570624	0.222531	1.11022e-16	15.9546	4.65574e-14	13.332	2.96678	179
2	p21	MIR559	NR_030286	47604813	47604909	0.468444	0.468443	PANCAN	2p	amp	cent	p	1	p	0.95	38546917	66911894	0.250646	0.570624	0.222531	1.11022e-16	15.9546	4.65574e-14	13.332	2.96678	179
2	p21	MSH2	NM_001258281	47630205	47710367	0.468158	0.467253	PANCAN	2p	amp	cent	p	1	p	0.95	38546917	66911894	0.250646	0.570624	0.222531	1.11022e-16	15.9546	4.65574e-14	13.332	2.96678	179
2	p21	KCNK12	NM_022055	47747914	47797470	0.46683	0.466271	PANCAN	2p	amp	cent	p	1	p	0.95	38546917	66911894	0.250646	0.570624	0.222531	1.11022e-16	15.9546	4.65574e-14	13.332	2.96678	179
2	p21	HCG2040054	NR_120602	47754675	47756303	0.466753	0.466735	PANCAN	2p	amp	cent	p	1	p	0.95	38546917	66911894	0.250646	0.570624	0.222531	1.11022e-16	15.9546	4.65574e-14	13.332	2.96678	179
2	p16.3	MSH6	NM_001281493	48010220	48034092	0.463871	0.463601	PANCAN	2p	amp	cent	p	1	p	0.95	38546917	66911894	0.250646	0.570624	0.222531	1.11022e-16	15.9546	4.65574e-14	13.332	2.96678	179
2	p16.3	FBXO11	NM_001190274	48034058	48132932	0.463602	0.462486	PANCAN	2p	amp	cent	p	1	p	0.95	38546917	66911894	0.250646	0.570624	0.222531	1.11022e-16	15.9546	4.65574e-14	13.332	2.96678	179
2	p16.3	FOXN2	NM_002158	48541794	48606434	0.457874	0.457145	PANCAN	2p	amp	cent	p	1	p	0.95	38546917	66911894	0.250646	0.570624	0.222531	1.11022e-16	15.9546	4.65574e-14	13.332	2.96678	179
2	p16.3	PPP1R21	NM_152994	48667907	48742531	0.456452	0.45561	PANCAN	2p	amp	cent	p	1	p	0.95	38546917	66911894	0.250646	0.570624	0.222531	1.11022e-16	15.9546	4.65574e-14	13.332	2.96678	179
2	p16.3	STON1-GTF2A1L	NM_001198593	48757063	49003656	0.455446	0.452664	PANCAN	2p	amp	cent	p	1	p	0.95	38546917	66911894	0.250646	0.570624	0.222531	1.11022e-16	15.9546	4.65574e-14	13.332	2.96678	179
2	p16.3	STON1	NM_001198595	48757307	48825654	0.455443	0.454672	PANCAN	2p	amp	cent	p	1	p	0.95	38546917	66911894	0.250646	0.570624	0.222531	1.11022e-16	15.9546	4.65574e-14	13.332	2.96678	179
2	p16.3	GTF2A1L	NM_006872	48844918	48906751	0.454455	0.453757	PANCAN	2p	amp	cent	p	1	p	0.95	38546917	66911894	0.250646	0.570624	0.222531	1.11022e-16	15.9546	4.65574e-14	13.332	2.96678	179
2	p16.3	LHCGR	NM_000233	48913912	48982880	0.453676	0.452898	PANCAN	2p	amp	cent	p	1	p	0.95	38546917	66911894	0.250646	0.570624	0.222531	1.11022e-16	15.9546	4.65574e-14	13.332	2.96678	179
2	p16.3	FSHR	NM_181446	49189295	49381666	0.45057	0.4484	PANCAN	2p	amp	cent	p	1	p	0.95	38546917	66911894	0.250646	0.570624	0.222531	1.11022e-16	15.9546	4.65574e-14	13.332	2.96678	179
2	p16.3	MIR548BA	NR_107011	49286741	49286797	0.449471	0.44947	PANCAN	2p	amp	cent	p	1	p	0.95	38546917	66911894	0.250646	0.570624	0.222531	1.11022e-16	15.9546	4.65574e-14	13.332	2.96678	179
2	p16.3	NRXN1	NM_001330084	50145642	51259674	0.439782	0.427214	PANCAN	2p	amp	cent	p	1	p	0.95	38546917	66911894	0.250646	0.570624	0.222531	1.11022e-16	15.9546	4.65574e-14	13.332	2.96678	179
2	p16.3	MIR8485	NR_130470	50923309	50923400	0.431009	0.431008	PANCAN	2p	amp	cent	p	1	p	0.95	38546917	66911894	0.250646	0.570624	0.222531	1.11022e-16	15.9546	4.65574e-14	13.332	2.96678	179
2	p16.3	LOC730100	NR_135237	51259738	52635055	0.427214	0.411699	PANCAN	2p	amp	cent	p	1	p	0.95	38546917	66911894	0.250646	0.570624	0.222531	1.11022e-16	15.9546	4.65574e-14	13.332	2.96678	179
2	p16.3	LINC01867	NR_135239	52597785	52617208	0.41212	0.4119	PANCAN	2p	amp	cent	p	1	p	0.95	38546917	66911894	0.250646	0.570624	0.222531	1.11022e-16	15.9546	4.65574e-14	13.332	2.96678	179
2	p16.2	MIR4431	NR_039630	52929659	52929753	0.408376	0.408375	PANCAN	2p	amp	cent	p	1	p	0.95	38546917	66911894	0.250646	0.570624	0.222531	1.11022e-16	15.9546	4.65574e-14	13.332	2.96678	179
2	p16.2	ASB3	NM_016115	53897116	54014146	0.397462	0.396142	PANCAN	2p	amp	cent	p	1	p	0.95	38546917	66911894	0.250646	0.570624	0.222531	1.11022e-16	15.9546	4.65574e-14	13.332	2.96678	179
2	p16.2	GPR75-ASB3	NM_001164165	53897449	54087170	0.397458	0.395318	PANCAN	2p	amp	cent	p	1	p	0.95	38546917	66911894	0.250646	0.570624	0.222531	1.11022e-16	15.9546	4.65574e-14	13.332	2.96678	179
2	p16.2	CHAC2	NM_001346127	53994919	54002333	0.396359	0.396275	PANCAN	2p	amp	cent	p	1	p	0.95	38546917	66911894	0.250646	0.570624	0.222531	1.11022e-16	15.9546	4.65574e-14	13.332	2.96678	179
2	p16.2	ERLEC1	NM_015701	54014067	54045956	0.396143	0.395783	PANCAN	2p	amp	cent	p	1	p	0.95	38546917	66911894	0.250646	0.570624	0.222531	1.11022e-16	15.9546	4.65574e-14	13.332	2.96678	179
2	p16.2	MIR3682	NR_037453	54076258	54076342	0.395441	0.39544	PANCAN	2p	amp	cent	p	1	p	0.95	38546917	66911894	0.250646	0.570624	0.222531	1.11022e-16	15.9546	4.65574e-14	13.332	2.96678	179
2	p16.2	GPR75	NM_006794	54080049	54087170	0.395398	0.395318	PANCAN	2p	amp	cent	p	1	p	0.95	38546917	66911894	0.250646	0.570624	0.222531	1.11022e-16	15.9546	4.65574e-14	13.332	2.96678	179
2	p16.2	PSME4	NM_014614	54091203	54197977	0.395273	0.394068	PANCAN	2p	amp	cent	p	1	p	0.95	38546917	66911894	0.250646	0.570624	0.222531	1.11022e-16	15.9546	4.65574e-14	13.332	2.96678	179
2	p16.2	ACYP2	NM_001320587	54198239	54532435	0.394065	0.390295	PANCAN	2p	amp	cent	p	1	p	0.95	38546917	66911894	0.250646	0.570624	0.222531	1.11022e-16	15.9546	4.65574e-14	13.332	2.96678	179
2	p16.2	TSPYL6	NM_001003937	54480314	54483409	0.390883	0.390848	PANCAN	2p	amp	cent	p	1	p	0.95	38546917	66911894	0.250646	0.570624	0.222531	1.11022e-16	15.9546	4.65574e-14	13.332	2.96678	179
2	p16.2	C2orf73	NM_001100396	54558070	54588714	0.390006	0.38966	PANCAN	2p	amp	cent	p	1	p	0.95	38546917	66911894	0.250646	0.570624	0.222531	1.11022e-16	15.9546	4.65574e-14	13.332	2.96678	179
2	p16.2	SPTBN1	NM_003128	54683453	54898583	0.388592	0.386165	PANCAN	2p	amp	cent	p	1	p	0.95	38546917	66911894	0.250646	0.570624	0.222531	1.11022e-16	15.9546	4.65574e-14	13.332	2.96678	179
2	p16.2	RPL23AP32	NR_002229	54756358	54756978	0.387769	0.387762	PANCAN	2p	amp	cent	p	1	p	0.95	38546917	66911894	0.250646	0.570624	0.222531	1.11022e-16	15.9546	4.65574e-14	13.332	2.96678	179
2	p16.1	EML6	NM_001039753	54952148	55199156	0.385561	0.382774	PANCAN	2p	amp	cent	p	1	p	0.95	38546917	66911894	0.250646	0.570624	0.222531	1.11022e-16	15.9546	4.65574e-14	13.332	2.96678	179
2	p16.1	RTN4	NM_001321904	55199325	55364967	0.382772	0.380904	PANCAN	2p	amp	cent	p	1	p	0.95	38546917	66911894	0.250646	0.570624	0.222531	1.11022e-16	15.9546	4.65574e-14	13.332	2.96678	179
2	p16.1	CLHC1	NM_001135598	55399686	55459699	0.380512	0.379835	PANCAN	2p	amp	cent	p	1	p	0.95	38546917	66911894	0.250646	0.570624	0.222531	1.11022e-16	15.9546	4.65574e-14	13.332	2.96678	179
2	p16.1	RPS27A	NM_001135592	55459038	55462989	0.379842	0.379798	PANCAN	2p	amp	cent	p	1	p	0.95	38546917	66911894	0.250646	0.570624	0.222531	1.11022e-16	15.9546	4.65574e-14	13.332	2.96678	179
2	p16.1	MIR4426	NR_039624	55461299	55461985	0.379817	0.379809	PANCAN	2p	amp	cent	p	1	p	0.95	38546917	66911894	0.250646	0.570624	0.222531	1.11022e-16	15.9546	4.65574e-14	13.332	2.96678	179
2	p16.1	MTIF2	NM_001321004	55463755	55496384	0.379789	0.379421	PANCAN	2p	amp	cent	p	1	p	0.95	38546917	66911894	0.250646	0.570624	0.222531	1.11022e-16	15.9546	4.65574e-14	13.332	2.96678	179
2	p16.1	PRORSD1P	NR_027258	55509454	55511607	0.379274	0.379249	PANCAN	2p	amp	cent	p	1	p	0.95	38546917	66911894	0.250646	0.570624	0.222531	1.11022e-16	15.9546	4.65574e-14	13.332	2.96678	179
2	p16.1	CCDC88A	NM_001254943	55514977	55647057	0.379211	0.377721	PANCAN	2p	amp	cent	p	1	p	0.95	38546917	66911894	0.250646	0.570624	0.222531	1.11022e-16	15.9546	4.65574e-14	13.332	2.96678	179
[truncated: 8,637 more rows]

## Sheet: Table S3b
Table S3b
BrISCUT peaks from pan-cancer analysis, sorted from left to right by Significance Score. Each column represents a peak.
peak_location = chr[#]:start_base-end_base
combined_sig = log10_ksby * ks_stat = Significance Score
log10_ksby = log10 of KS q-value
ks_stat = Kolmogorov-Smirnov statistic
code = unique identifier for each peak; each element separated by a dash represents an iteration. First iteration is always "n" or "p" (for negative or positive), and next iterations include "l" or "r" (for left or right) along with "n" or "p".
TS or onco-like = onco-like reflects positive selection for amplifications or negative selection for deletions; TS-like reflects positive selection for deletions or negative selection for amplifications
cytoband	5p15.33	8q24.21	3q26.2	8p21.1	17q24.3	2q33.1	17p13.1	8p21.3	5q12.3	15q15.1	17p13.1	8q24.21	1p34.2	9p21.3	3p14.3	19p13.2	2p23.1	1p36.11	10q24.2	19p13.11	3q26.2	8q22.3	17p12	1p13.3	11q13.3	3p21.31	3p21.31	5q11.2	19q13.32	6p21.1	9q32	1p36.11	19p13.3	14q22.1	19q13.12	16p13.13	12q15	7q22.1	19p13.3	18q21.2	19q13.32	2p21	6q14.3	9p13.3	6q13	1q24.2	17q23.2	17p11.2	1q32.1
peak_location	chr5:1020354-1287540	chr8:125999170-129681896	chr3:170147874-172215574	chr8:27775528-28090343	chr17:67895465-68616595	chr2:197805899-198934377	chr17:9114837-10228815	chr8:18780426-19669367	chr5:65575131-66927830	chr15:39687126-42852310	chr17:7253001-7583290	chr8:128606666-130425528	chr1:41039049-41756048	chr9:21125944-22003260	chr3:56079214-56536253	chr19:13305524-13784368	chr2:30120058-31809284	chr1:26902694-27312816	chr10:99147935-101004945	chr19:11753832-19945779	chr3:169384296-170516109	chr8:102319239-103298753	chr17:13807528-15694785	chr1:110485495-111421427	chr11:70071718-70240415	chr3:31013358-59701429	chr3:46644268-52129042	chr5:55926493-56463157	chr19:47446561-48104221	chr6:41439249-42958900	chr9:113185521-116570359	chr1:26478393-27903342	chr19:3626786-4271622	chr14:50566072-59830511	chr19:28493000-37754420	chr16:10512834-11106707	chr12:69022295-72088228	chr7:98108470-100117279	chr19:3695700-3815535	chr18:48595048-48980675	chr19:42775930-47388577	chr2:38546917-66911894	chr6:82494351-88728693	chr9:34675471-35415710	chr6:62346745-89163505	chr1:166627412-183524293	chr17:57992761-61932912	chr17:19165168-19227335	chr1:201894655-205292689
combined_sig	9.9821424615	7.36939388472	7.0103916107	6.60258725499	5.73857913773	5.44684923965	5.32082318906	5.09128306485	4.99216172166	4.97164496166	4.93162019386	4.63570341758	4.40383207816	4.28775612027	4.27109984342	4.19341976512	4.06407759229	4.06247371386	4.02401947701	4.00831899784	3.9714774767	3.96979390366	3.9261338668	3.88004333517	3.80916107568	3.80033368394	3.74056165834	3.72789845008	3.63559493518	3.55260144795	3.487459276	3.42708978947	3.33789557377	3.31393590846	3.29182895712	3.27054178222	3.26200047482	3.23381113197	3.12012422904	3.11746088542	3.00446380117	2.96678357781	2.95101177957	2.92371990283	2.8378213292	2.7812048033	2.77120000416	2.76429901874	2.70650420888
log10_ksby	16.0	16.0	16.0	16.0	16.0	16.0	16.0	16.0	16.0	16.0	16.0	16.0	16.0	16.0	16.0	16.0	16.0	16.0	16.0	16.0	16.0	16.0	16.0	16.0	16.0	16.0	16.0	16.0	16.0	16.0	16.0	16.0	12.3302222529	16.0	16.0	16.0	16.0	16.0	16.0	16.0	16.0	13.3320115208	16.0	16.0	16.0	16.0	16.0	12.0862368879	12.2983694721
ks_stat	0.623883903844	0.460587117795	0.438149475669	0.412661703437	0.358661196108	0.340428077478	0.332551449316	0.318205191553	0.312010107604	0.310727810104	0.308226262116	0.289731463599	0.275239504885	0.267984757517	0.266943740214	0.26208873532	0.254004849518	0.253904607116	0.251501217313	0.250519937365	0.248217342294	0.248112118979	0.245383366675	0.242502708448	0.23807256723	0.237520855246	0.233785103646	0.23299365313	0.227224683449	0.222037590497	0.21796620475	0.214193111842	0.270708467804	0.207120994279	0.20573930982	0.204408861389	0.203875029676	0.202113195748	0.195007764315	0.194841305339	0.187778987573	0.222530829139	0.184438236223	0.182732493927	0.177363833075	0.173825300206	0.17320000026	0.228714615176	0.220070165807
direction	amp	del	del	del	del	del	amp	amp	del	amp	del	amp	del	del	del	del	del	del	amp	amp	amp	amp	del	del	del	del	amp	del	del	del	del	amp	amp	del	amp	del	del	del	del	del	amp	amp	del	del	amp	amp	amp	del	del
telomeric or centromeric	tel	tel	tel	tel	tel	tel	tel	tel	tel	tel	tel	tel	tel	tel	tel	tel	tel	tel	tel	cent	tel	tel	tel	tel	tel	cent	tel	tel	tel	tel	tel	tel	tel	tel	cent	tel	tel	tel	tel	tel	cent	cent	tel	tel	cent	cent	tel	tel	tel
selection	p	n	n	p	n	n	n	n	p	n	p	p	n	p	p	n	n	p	n	p	p	p	p	p	n	p	n	p	p	n	n	n	n	n	p	n	n	n	p	p	n	p	p	n	n	p	p	n	n
code	p-ln-ln-lp	n	n	p	n	n	n	n	p	n-rn	p-lp	p-lp	n	p	p	n	n	n-lp	n	p	p	p	p	n-rp	p-rn	p	n	p-rp	n-lp	n	n	n	n	p-rn	p	n	n	n	n-lp	p	p-rn	p	p	p-rn	n	p	p	p-rp-rn-lp-rn	n
TS or onco-like	onco-like	onco-like	onco-like	TS-like	onco-like	onco-like	TS-like	TS-like	TS-like	TS-like	TS-like	onco-like	onco-like	TS-like	TS-like	onco-like	onco-like	TS-like	TS-like	onco-like	onco-like	onco-like	TS-like	TS-like	onco-like	TS-like	TS-like	TS-like	TS-like	onco-like	onco-like	TS-like	TS-like	onco-like	onco-like	onco-like	onco-like	onco-like	TS-like	TS-like	TS-like	onco-like	TS-like	onco-like	TS-like	onco-like	onco-like	onco-like	onco-like
genes	NKD2	LOC105375744	CLDN11	SCARA5	LINC01483	ANKRD44	NTN1	PSD3	LINC02229	THBS1	ACAP1	CASC11	RIMS3	IFNW1	ERC2	CACNA1A	ALK	LOC101928728	RRP12	ZNF833P	TERC	NACAP1	CDRT15P1	AHCYL1	PPFIA1	MIR466	FAM240A	MAP3K1	ARHGAP35	LINC01276	SVEP1	FAM110D	CACTIN	LINC01599	LOC101927151	ATF7IP2	RAP1B	NPTX2	PIP5K1C	SMAD4	CIC	ATL2	LINC01526	CCL19	KHDRBS2	POGK	RPS6KB1	EPN2	LMOD1
	SLC12A7	SQLE	SLC7A14	NUGGC	LINC01497	LOC101927596	STX8	LOC100128993	MAST4	FSIP1	KCTD11	MYC	NFYC-AS1	IFNA21			YPEL5	ARID1A	PGAM1	ZNF823	ACTRT3	GRHL2	COX10-AS1	STRIP1	MIR548K	STT3B	ALS2CL	SETD9	NPAS1	FOXP4-AS1	MUSK	ZNF593	PIP5K1C	VCPKMT	LOC100420587	LINC01290	LOC100507250	TMEM130	TJP3	MEX3C	PAFAH1B3	LINC01883	LINC02542	CCL21	LGSN	TADA1	RNFT1	EPN2-IT1	TIMM17A
	MIR4635	WASHC5	LOC101928583	ELP3	LINC01028	ANKRD44-IT1	CFAP52	SH2D4A	MAST4-AS1	LOC105370941	TMEM95	PVT1	NFYC	IFNA4			SNORA10B	PIGV	EXOSC1	ZNF441	MYNN	NCALD	COX10	ALX3		OSBPL10	TMIE	MIER3	TMEM160	FOXP4	LPAR1	CNKSR1	TJP3	SOS2	LOC102724908	EMP2	NUP107	TRRAP	APBA3	LINC01630	PRR19	LOC101929596	IBTK	FAM205A	PTP4A1	ILDR2	TBC1D3P1-DHX40P1	EPN2-AS1	SNORA70H
	CTD-3080P12.3	NSMCE2	RPL22L1		KCNJ16	SF3B1	USP43	CSGALNACT1	CD180	GPR176	TNK1	MIR1204	MIR30E	IFNA7			LBH	ZDHHC18	ZDHHC16	ZNF491	LRRC34	LOC104054148	CDRT15	LINC01397		OSBPL10-AS1	PRSS50		ZC3H4	MIR4641	MIR7702	CATSPER4	APBA3	L2HGDH	LINC00906	TEKT5	SLC35E3	MIR3609	MRPL54		TMEM145	HNRNPLL	TPBG	FAM205BP	PHF3	MAEL	RNFT1-DT		RNPEP
	SLC6A19	TRIB1	EIF5A2		KCNJ2-AS1	COQ10B	DHRS7C			EIF2AK4	PLSCR3	TMEM75	MIR30C1	IFNA10			LOC285043	SFN	MMS19	ZNF440	LRRIQ4	MIR5680	HS3ST3B1	UBL4B		ZNF860	PRSS46P		SAE1	MDFI	OR2K2	LOC101928303	MRPL54	MIR4504	LOC102724958	NUBP1	LOC100130075	SCARNA28	RAX2		MEGF8	GALM	UBE3D	FAM205C	EYS	GPA33	MIR4737		ELF3-AS1
	SLC6A18	LINC00861	SLC2A2		KCNJ2	HSPD1	GSG1L2			SRP14	TMEM256-PLSCR3	MIR1205	KCNQ4	IFNA16			LCLAT1	GPN2	UBTD1	ZNF439	LRRC31	RRM2B	MGC12916	SLC6A17		GPD1L	PRSS45		BBC3	TFEB	KIAA0368	CEP85	RAX2	ATP5S	LINC01532	TVP23A	MDM2	LOC101927550	MATK		MIR8077	SRSF7	DOPEY1	PHF24	LOC441155	DUSP27	HEATR6		MIR6740
	TERT	LOC101927657	TNIK			SNORA105A	GLP2R			SRP14-AS1	TMEM256	MIR1206	CITED4	IFNA17			CAPN13	GPATCH3	ANKRD2	ZNF69	SAMD7	UBR5-AS1	LOC101928475	KCNC4-AS1		CMTM8	PRSS42		MIR3190	PGC	ZNF483	SH3BGRL3	MATK	CDKL1	UQCRFS1	CIITA	CPM	SMURF1	ZFR2		CNFN	GEMIN6	PGM3	DNAJB5-AS1	SLC25A51P1	LINC01363	LOC105371849		ELF3
		FAM84B	MIR569			SNORA105B	RCVRN			BMF	NLGN2	MIR1207	CTPS1	IFNA14			GALNT14	NR0B2	HOGA1	ZNF700	LOC100128164	UBR5	CDRT7	KCNC4		CMTM7	MYL3		MIR3191	FRS3	PTGR1	UBXN11	ZFR2	MAP4K5	LOC284395	DEXI	CPSF6	KPNA7			LOC101930071	DHX57	RWDD2A	DNAJB5	LOC102723883	POU2F1	WFDC21P		GPR37L1
		PCAT1	PLD1			HSPE1	GAS7			BUB1B	SPEM1	MIR1208	SLFNL1-AS1	IFNA22P			CAPN14	NUDC	C10orf62	ZNF763	SEC62		CDRT8	RBM15-AS1		CMTM6	PTH1R		CCDC9	PRICKLE4	LRRC37A5P	CD52	ATCAY	ATL1	VSTM2B	CLEC16A	MIR1279	MYH16			LIPE-AS1	MORN2	ME1	C9orf131	LINC02549	CD247	LOC653653		ARL8A
		PCAT2	TMEM212			HSPE1-MOB4	MYH13			BUB1B-PAK6	SPEM2	LINC00824	SLFNL1	IFNA5			EHD3	KDF1	MORN4	ZNF433-AS1	GPR160		PMP22	RBM15		MIR548AY	CCDC12		INAFM1	TOMM6	DNAJC25	CRYBG2	NMRK2	SAV1	POP4		LYZ	ARPC1A			LIPE	ARHGEF33	PRSS35	VCP	LOC101928307	CREG1	CA4		PTPN7
		PRNCR1	TMEM212-AS1			MOB4				PAK6	TMEM102	LINC00976	SCMH1	KLHL9			XDH		PI4K2A	ZNF433	PHC3		MIR4731	SLC16A4		DYNC1LI1	NBEAL2		C5AR1	USP49	DNAJC25-GNG10	ZNF683	DAPK3	NIN	PLEKHF1		YEATS4	ARPC1B			CXCL17	LOC375196	SNAP91	FANCG	ADGRB3	RCSD1	USP32		PTPRVP
		CASC19	FNDC3B			RFTN2				C15orf56	FGF11	LINC00977		IFNA6			SRD5A2		AVPI1	ZNF878	PRKCI		TEKT3	LAMTOR5		CNOT10	NRADDP		C5AR2	MED20	GNG10	LIN28A	MIR637	LOC105370489	C19orf12		FRS2	PDAP1			CEACAM1	SOS1	LOC105377879	PIGO	LMBRD1	MPZL1	SCARNA20		LGR6
		CCAT1	GHSR			MARS2				ANKRD63	CHRNB1	CCDC26		IFNA13					MARVELD1	ZNF844	SKIL		CDRT4	LAMTOR5-AS1		TRIM71	SETD2		DHX34	BYSL	C9orf84	DHDDS	EEF2	ABHD12B	CCNE1		SNORA113	BUD31			CEACAM8	CDKL4	RIPPLY2	STOML2	COL19A1	ADCY10	C17orf64		UBE2T
		CASC21				BOLL				PLCB2	ZBTB4			IFNA2					ZFYVE27	ZNF788	CLDN11		TVP23C-CDRT4	PROK1		CCR4	KIF9-AS1		MEIS3	CCND3	UGCG	LOC101928324	SNORD37	PYGL	URI1		MIR3913-1	ATP5MF-PTCD1			PSG3	MAP4K3	CYB5R4	FAM214B	COL9A1	MPC2	APPBP2		PPP1R12B
		CASC8				PLCL1				INAFM2	SLC35G6			IFNA8					SFRP5	ZNF20	MIR6828		CDRT3	CYMP		GLB1	KIF9		SLC8A2	TAF8	MIR4668	HMGN2	PIAS4	TRIM9	ZNF536		MIR3913-2	PTCD1			PSG8	LOC728730	MRAP2	UNC13B	EVADR	DCAF6	LINC01999		SYT2
		CCAT2								CCDC9B	POLR2A			IFNA1					LINC00866	ZNF625-ZNF20	SLC7A14		TVP23C	CYMP-AS1		TMPPE	SNORD13J		KPTN	C6orf132	SUSD1	RPS6KA1	ZBTB7A	TMX1	TSHZ3		CCT2	CPSF4			PSG8-AS1	TMEM178A	CEP162	ATP8B5P	LOC105377849	MIR1255B2	PPM1D		KDM5B
		POU5F1B								PHGR1	TNFSF12			MIR31HG					GOLGA7B	ZNF625	LOC101928583		CDRT1	KCNA10		CRTAP	KLHL18		NAPA-AS1	GUCA1A	PTBP3	MIR1976	MAP2K2	LINC00519	LINC01791		LRRC10	ATP5MF			PSG10P	THUMPD2	LINC01611		FAM135A	GPR161	BCAS3		PCAT6
		CASC11								DISP2	TNFSF12-TNFSF13			IFNE					CRTAC1	ZNF136			TRIM16	KCNA2		SUSD5	PTPN23		NAPA	GUCA1B	HSDL2	LOC101928728	CREB3L3	LINC00640	THEG5		BEST3	ZNF789			PSG1	SLC8A1-AS1	TBX18-AS1		SDHAF4	TIPRL	LOC101927855		MGAT4EP
		MYC								KNSTRN	TNFSF13			MIR31					R3HCC1L	LOC100289333			ZNF286A	KCNA3		FBXL2	SCAP		ZNF541	MRPS10	C9orf147	ARID1A	SIRT6	LINC02310	LINC01533		RAB3IP	ZNF394			PSG6	SLC8A1	TBX18		SMAP1	SFT2D2	TBX2-AS1		LOC148709
		PVT1								IVD	SENP3			MTAP					LOXL4	ZNF44			TBC1D26	CD53		UBP1	ELP6			TRERF1	KIAA1958	PIGV	ANKRD24	FRMD6-AS2	LINC01782		MYRFL	ZKSCAN5			PSG7	LINC01913	LINC02535		B3GAT2	ANKRD36BP1	TBX2		RABIF
		MIR1204								BAHD1	SENP3-EIF4A1			CDKN2A-AS1					PYROXD2	ZNF563			CDRT15P2			CLASP2	CSPG5			UBR2	INIP	ZDHHC18	EBI3	FRMD6	ZNF507		LINC01481	FAM200A			PSG11	LINC01914	NT5E		OGFRL1	TBX19	C17orf82		KLHL12
		TMEM75								CHST14	EIF4A1			CDKN2A					MIR1287	ZNF442			MEIS3P1			PDCD6IP	SMARCC1			PRPH2	SNX30	SFN	CCDC94	FRMD6-AS1	LOC400684		CNOT2	ZNF655			PSG2	C2orf91	SNX14		MIR30C2	MIR557	TBX4		ADIPOR1
		MIR1205								CCDC32	SNORA48			CDKN2B-AS1					HPS1	ZNF799						LOC101928135	SNORD146			ATP6V0CP3	SLC46A2	GPN2		GNG2	DPY19L3		KCNMB4	TMEM225B			PSG5	PKDCC	SYNCRIP		MIR30A	LOC100505918	NACA2		CYB5R1
		MIR1206								MRPL42P5	SNORD10			CDKN2B					MIR4685	ZNF443						ARPP21	DHX30			TBCC	ZNF883	GPATCH3		LOC102723604	PDCD5		PTPRB	ZSCAN25			PSG4	LOC102723824	SNHG5		LINC00472	LOC101928565	BRIP1		LOC100506747
		MIR1207								RPUSD2	SNORA67								LOC101927278	ZNF709						MIR128-2	MIR1226			BICRAL	ZFP37	NR0B2		RTRAF	ANKRD27		PTPRR	CYP3A5			LOC284344	EML4	SNORD50A		LINC01626	XCL2	INTS2		TMEM183A
		MIR1208								KNL1	CD68								HPSE2	ZNF564						STAC	MAP4			LOC401261	FAM225B	NUDC		NID2	SNORA68B		TSPAN8	CYP3A7-CYP3A51P			PSG9	COX7A2L	SNORD50B		RIMS1	XCL1	MED13		TMEM183B
		LINC00824								RAD51-AS1	LOC100996842								MIR6507	ZNF490						DCLK3	CDC25A			RPL7L1	FAM225A	KDF1		PTGDR	RGS9BP		LGR5	CYP3A7			PRG1	KCNG3	HTR1E		KCNQ5	DPT	TBC1D3P2		PPFIA4
										RAD51	MPDU1									ZNF791						LINC02033	MIR4443			C6orf226	SLC31A2	TRNP1		PTGER2	NUDT19		ZFC3H1	CYP3A4			CD177	MTA3	CGA		KCNQ5-IT1	LINC00626	EFCAB3		MYOG
										RMDN3	SOX15									MAN2B1						TRANK1	CAMP			PTCRA	FKBP15	FAM46B		TXNDC16	TDRD12		THAP2	CYP3A43			TEX101	OXER1	ZNF292		MIR4282	LINC00970	METTL2A		ADORA1
										GCHFR	FXR2									WDR83						EPM2AIP1	ZNF589			CNPY3	SLC31A1	SLC9A1		GPR137C	SLC7A9		TMEM19	OR2AE1			LYPD3	HAAO	GJB7		KCNQ5-AS1	LOC101928596	TLK2		MYBPH
										DNAJC17	SHBG									WDR83OS						MLH1	FCF1P2			CNPY3-GNMT	CDC26	WDTC1		ERO1A	CEP89			TRIM4			PHLDB3	LINC01819	SMIM8		KHDC1L	ATP1B1	MRC2		CHI3L1
										C15orf62	SAT2									DHPS						LRRFIP2	NME6			GNMT	PRPF4	TMEM222		PSMC6	FAAP24			GJC3			ETHE1	LINC02580	C6orf163		KHDC1	NME7	MARCH10		CHIT1
										ZFYVE19	ATP1B2									GNG14						LOC152048	SPINK8			PEX6	RNF183	ACTG1P20		STYX	RHPN2			AZGP1			ZNF575	ZFP36L2	LINC01590		DPPA5	BLZF1	LOC105371855		LINC01353
										PPP1R14D	TP53									FBXW9						GOLGA4	MIR2115			PPP2R5D	WDR31	SYTL1		GNPNAT1	GPATCH1			AZGP1P1			XRCC1	LINC01126	CFAP206		KHDC3L	CCDC181	LOC101927877		LINC01136
										SPINT1-AS1										TNPO2						C3orf35	FBXW12				BSPRY	MAP3K6		FERMT2	WDR88			ZKSCAN1			PINLYP	THADA	SLC35A1		OOEP	SLC19A2	MIR633		BTG2
										SPINT1										SNORD135						ITGA9	PLXNB1				HDHD3	FCN3		DDHD1	LRP3			ZSCAN21			IRGQ	PLEKHH2	RARS2		DDX43	F5	TANC2		FMOD
										RHOV										SNORD41						ITGA9-AS1	CCDC51				ALAD	CD164L2		LOC101927620	SLC7A10			ZNF3			ZNF576	C1GALT1C1L	ORC3		CGAS	SELP	CYB561		PRELP
										VPS18										TRIR						CTDSPL	TMA7				POLE3	GPR3		MIR5580	CEBPA			COPS6			ZNF428	DYNC2LI1	AKIRIN2		MTO1	SELL	ACE		OPTC
										LOC105370943										ASNA1						MIR26A1	ATRIP				C9orf43	WASF2		BMP4	CEBPA-AS1			MCM7			SRRM5	ABCG5	LOC101928911		EEF1A1	SELE	KCNH6		ATP2B4
										DLL4										BEST2						VILL	TREX1				RGS3	AHDC1		CDKN3	CEBPG			MIR25			CADM4	ABCG8			SNORD141A	METTL18	DCAF7		SNORA77
										CHAC1										HOOK2						PLCD1	SHISA5							CNIH1	PEPD			MIR93			PLAUR	LRPPRC			SNORD141B	C1orf112	TACO1		LINC00260
										INO80										MIR5684						DLEC1	PFKFB4							GMFB	CHST8			MIR106B			IRGC	PPM1B			SLC17A5	SCYL3	MAP3K3		LAX1
										EXD1										JUNB						ACAA1	MIR6823							CGRRF1	KCTD15			AP4M1			SMG9	SLC3A1			LOC101928489	KIFAP3	LIMD2		ZC3H11A
										CHP1										PRDX2						MYD88	UCN2							SAMD4A	LSM14A			TAF6			KCNN4	PREPL			CD109	METTL11B	LOC729683		ZBED6
										OIP5-AS1										RNASEH2A						OXSR1	COL7A1							GCH1	KIAA0355			CNPY4			LYPD5	CAMKMT			LOC101928516	MIR3119-1	STRADA		SNRPE
										OIP5										RTBDN						SLC22A13	MIR711							MIR4308	GPI			MBLAC1			ZNF283	LINC01833			COL12A1	MIR3119-2	CCDC47		LINC00303
										NUSAP1										MAST1						SLC22A14	UQCRC1							WDHD1	PDCD2L			LAMTOR4			ZNF404	SIX3-AS1			SNORD156	LINC01681	DDX42		SOX13
										NDUFAF1										MIR6794						XYLB	SNORA94							SOCS4	UBA2			C7orf43			LOC100505715	SIX3			COX7A2	LINC01142	FTSJ3		ETNK2
										RTF1										DNASE2						ACVR2B-AS1	TMEM89							MAPK1IP1L	WTIP			MIR4658			ZNF45	SIX2			TMEM30A	LOC101928650	PSMC5		ERLNC1
										ITPKA										KLF1						ACVR2B	SLC26A6							LGALS3	ZNF807			GAL3ST4			ZNF221	LINC01121			LOC100506804	GORAB	SMARCD2		REN
										LTK										GCDH						EXOG	MIR6824							DLGAP5	SCGB1B2P			GPC2			ZNF155	SRBD1			FILIP1	PRRX1			KISS1
										RPAP1										SYCE2						SCN5A	CELSR3							FBXO34	SCGB2B2			STAG3			LOC101928063	PRKCE			LOC101928540	MROH9			GOLT1A
										TYRO3										FARSA						SCN10A	MIR4793							ATG14	SCGB2B3P			CASTOR3			ZNF230	EPAS1			MIR4463	FMO3			PLEKHA6
										MGA										FARSA-AS1						SCN11A	CELSR3-AS1							TBPL2	ZNF302			PVRIG			ZNF222	LINC01820			SENP6	MIR1295A			LINC00628
										MIR626										CALR						WDR48	NCKIPSD							KTN1-AS1	ZNF181			SPDYE3			ZNF223	LOC101805491			MYO6	MIR1295B			PPP1R15B
										MAPKBP1										MIR6515						GORASP1	IP6K2							KTN1	ZNF599			PMS2P1			ZNF284	TMEM247			IMPG1	FMO6P			PIK3C2B
										JMJD7										RAD23A						TTC21A	PRKAR2A							RPL13AP3	LINC01801			STAG3L5P-PVRIG2P-PILRB			ZNF224	ATP6V1E2			LINC02540	FMO2			MDM4
										JMJD7-PLA2G4B										GADD45GIP1						MIR6822	PRKAR2A-AS1							LINC00520	LINC00904			STAG3L5P			LOC100379224	RHOQ			HTR1B	FMO1			LRRN2
										PLA2G4B										DAND5						CSRNP1	SLC25A20							PELI2	LINC01838			PVRIG2P			ZNF225	LOC100506142			MEI4	FMO4			NFASC
										SPTBN5										NFIX						XIRP1	ARIH2OS							LOC101927690	ZNF30-AS1			MIR6840			ZNF234	PIGF			IRAK1BP1	TOP1P1			CNTN2
										MIR4310										LYL1						CX3CR1	ARIH2							TMEM260	ZNF30			PILRB			ZNF226	CRIPT			PHIP	PRRC2C			TMEM81
										LOC105370792										TRMT1						CCR8	P4HTM							OTX2	ZNF792			PILRA			ZNF227	SOCS5			HMGN3	MYOC			RBBP5
										EHD4										NACC1						SLC25A38	WDR6							OTX2-AS1	GRAMD1A			ZCWPW1			ZNF233	LINC01118			HMGN3-AS1	VAMP4			DSTYK
										EHD4-AS1										STX10						RPSA	DALRD3							EXOC5	SCN1B			MEPCE			ZNF235	LINC01119			LCAL1	METTL13			TMCC2
										PLA2G4E-AS1										IER2						SNORA6	MIR425							AP5M1	HPN			PPP1R35			ZNF112	MCFD2			LCA5	DNM3			NUAK2
										PLA2G4E										CACNA1A						SNORA62	NDUFAF3							NAA30	HPN-AS1			C7orf61			ZNF285	TTC7A			SH3BGRL2	DNM3-IT1
										PLA2G4D										CCDC130						MOBP	MIR191							CCDC198	FXYD3			TSC22D4			ZNF229	STPG4			RNY4	DNM3OS
										PLA2G4F										MRI1						MYRIP	IMPDH2							SLC35F4	MIR6887			NYAP1			ZNF180	CALM2			LINC01621	MIR214
										VPS39										C19orf53						EIF1B-AS1	QRICH1							C14orf37	LGI4						CEACAM20	LOC101927043			ELOVL4	MIR3120
										MIR627										ZSWIM4						EIF1B	QARS							ACTR10	FXYD1						CEACAM22P	EPCAM			TTK	MIR199A2
										TMEM87A										LOC284454						ENTPD3	MIR6890							PSMA3	FXYD7						IGSF23	MIR559			BCKDHB	C1orf105
										GANC										MIR24-2						ENTPD3-AS1	USP19							PSMA3-AS1	FXYD5						PVR	MSH2			FAM46A	PIGC
										CAPN3										MIR27A						RPL14	LAMB2							LINC00216	FAM187B						MIR4531	KCNK12			LINC01526	SUCO
										ZNF106										MIR23A						ZNF619	LAMB2P1							ARID4A	LSR						CEACAM19	HCG2040054			LINC02542	FASLG
										SNAP23										NANOS3						ZNF620	CCDC71							TOMM20L	USF2						CEACAM16	MSH6			IBTK	TNFSF18
										LRRC57										MIR181C						ZNF621	KLHDC8B							TIMM9	HAMP						BCL3	FBXO11			TPBG	TNFSF4
										HAUS2										MIR181D						CTNNB1	C3orf84							KIAA0586	MAG						MIR8085	FOXN2			UBE3D	LOC100506023
																				C19orf57						ULK4	CCDC36							DACT1	CD22						CBLC	PPP1R21			DOPEY1	LOC101928673
																				CC2D1A						TRAK1	C3orf62							LINC01500	MIR5196						BCAM	STON1-GTF2A1L			PGM3	PRDX6
																				PODNL1						CCK	MIR4271							DAAM1	FFAR1						NECTIN2	STON1			RWDD2A	SLC9C2
																				DCAF15						LYZL4	USP4								FFAR3						TOMM40	GTF2A1L			ME1	ANKRD45
																				RFX1						VIPR1	GPX1								GPR42						APOE	LHCGR			PRSS35	TEX50
																				RLN3						VIPR1-AS1	RHOA								LINC01531						APOC1	FSHR			SNAP91	KLHL20
																				IL27RA						SEC22C	TCTA								FFAR2						APOC1P1	MIR548BA			LOC105377879	CENPL
																				PALM3						SS18L2	AMT								KRTDAP						APOC4	NRXN1			RIPPLY2	DARS2
																				MISP3						NKTR	NICN1								DMKN						APOC4-APOC2	MIR8485			CYB5R4	GAS5-AS1
																				MIR1199						LOC101928323	DAG1								SBSN						APOC2	LOC730100			MRAP2	GAS5
																				C19orf67						ZBTB47	BSN-AS2								GAPDHS						CLPTM1	LINC01867			CEP162	SNORD81
																				SAMD1						KLHL40	BSN								TMEM147-AS1						RELB	MIR4431			LINC01611	SNORD47
																				PRKACA						HHATL	APEH								TMEM147						CLASRP	ASB3			TBX18-AS1	SNORD80
																				ASF1B						HHATL-AS1	MST1								ATP4A						ZNF296	GPR75-ASB3			TBX18	SNORD79
																				LOC100507373						CCDC13	RNF123								LINC01766						GEMIN7	CHAC2			LINC02535	SNORD78
																				ADGRL1						CCDC13-AS1	AMIGO3								HAUS5						GEMIN7-AS1	ERLEC1			NT5E	SNORD44
																				LINC01841						LINC02158	GMPPB								RBM42						PPP1R37	MIR3682			SNX14	SNORA103
																				LINC01842						HIGD1A	IP6K1								ETV2						NKPD1	GPR75			SYNCRIP	SNORD77
																				ADGRE5						ACKR2	CDHR4								COX6B1						TRAPPC6A	PSME4			SNHG5	SNORD76
																				DDX39A						CYP8B1	FAM212A								UPK1A						BLOC1S3	ACYP2			SNORD50A	SNORD75
																				PKN1						ZNF662	UBA7								UPK1A-AS1						EXOC3L2	TSPYL6			SNORD50B	SNORD74
																				PTGER1						KRBOX1-AS1	MIR5193								ZBTB32						MARK4	C2orf73			HTR1E	ZBTB37
																				GIPC1						KRBOX1	TRAIP								KMT2B						CKM	SPTBN1			CGA	SERPINC1
																				DNAJB1						FAM198A	CAMKV								IGFLR1						KLC3	RPL23AP32			ZNF292	RC3H1
																				MIR639						POMGNT2	MST1R								U2AF1L4						ERCC2	EML6			GJB7	LOC102724601
																				TECR						SNRK	MON1A								PSENEN						PPP1R13L	RTN4			SMIM8	RABGAP1L
																				NDUFB7						SNRK-AS1	RBM6								LIN37						CD3EAP	CLHC1			C6orf163	GPR52
																				CLEC17A						ANO10	RBM5								HSPB6						ERCC1	RPS27A			LINC01590	LOC101928696
																				ADGRE3						ABHD5	RBM5-AS1								PROSER3						MIR6088	MIR4426			CFAP206	CACYBP
																				SNORA104						MIR138-1	SEMA3F-AS1								ARHGAP33						FOSB	MTIF2			SLC35A1	MRPS14
																				ZNF333						TOPAZ1	SEMA3F								LINC01529						RTN2	PRORSD1P			RARS2	TNN
																				ADGRE2						TCAIM	MIR566								PRODH2						PPM1N	CCDC88A			ORC3	KIAA0040
																				OR7C1						LINC00694	GNAT1								NPHS1						VASP	CFAP36			AKIRIN2	TNR
																				OR7A5						LINC01988	SLC38A3								KIRREL2						OPA3	PPP4R3B			LOC101928911	LINC01657
																				OR7A10						ZNF445	GNAI2								APLP1						GPR4	PNPT1			SPACA1	COP1
																				OR7A17						ZNF852	MIR5787								NFKBID						EML2	EFEMP1			CNR1	SCARNA3
																				OR7C2						ZKSCAN7	SEMA3B-AS1								HCST						MIR330	MIR217HG				PAPPA2
																				SLC1A6						ZNF660	SEMA3B								TYROBP						EML2-AS1	MIR217				ASTN1
																				CCDC105						ZNF660-ZNF197	MIR6872								LRFN3						GIPR	MIR216A				MIR488
																				CASP14						ZNF197-AS1	LSMEM2								LOC105372383						MIR642A	MIR216B				BRINP2
																				OR1I1						ZNF197	IFRD2								SDHAF1						MIR642B	LINC01813				LINC01645
																				SYDE1						ZNF35	HYAL3								SYNE4						SNRPD2	LOC100129434				LINC01741
																				ILVBL						ZNF502	NAT6								ALKBH6						QPCTL	CCDC85A				CRYZL2P-SEC16B
																				NOTCH3						ZNF501	HYAL1								LOC101927572						FBXO46	VRK2				SEC16B
																				MIR6795						KIAA1143	HYAL2								CLIP3						BHMG1	FANCL				CRYZL2P
																				EPHX3						KIF15	TUSC2								THAP8						SIX5	LINC01795				RASAL2-AS1
																				BRD4						MIR564	RASSF1								WDR62						DM1-AS	LINC01122				RASAL2
																				AKAP8						TMEM42	RASSF1-AS1								OVOL3						DMPK	LINC01793				TEX35
																				AKAP8L						TGM4	ZMYND10								POLR2I						DMWD	MIR4432HG				C1orf220
																				WIZ						ZDHHC3	NPRL2								TBCB						RSPH6A	MIR4432				MIR4424
																				MIR1470						EXOSC7	CYB561D2								CAPNS1						SYMPK	BCL11A				RALGPS2
																				RASAL3						CLEC3B	TMEM115								COX7A1						FOXA3	PAPOLG				ANGPTL1
																				PGLYRP2						CDCP1	CACNA2D2								ZNF565						IRF2BP1	LINC01185				FAM20B
																				CYP4F22						TMEM158	C3orf18								ZNF146						MYPOP	REL				TOR3A
																				CYP4F8						LARS2	HEMK1								LOC100134317						NANOS2	PUS10				ABL2
																				CYP4F3						LARS2-AS1	CISH								LINC00665						NOVA2	PEX13				SOAT1
																				CYP4F12						LIMD1	MAPKAPK3								ZFP14						CCDC61	KIAA1841				AXDND1
																				OR10H2						LIMD1-AS1	MIR4787								ZFP82						MIR769	LOC339803				NPHS2
																				OR10H3						SACM1L	DOCK3								LOC644189						PGLYRP1	C2orf74				TDRD5
																				CYP4F24P						SLC6A20	MANF								ZNF566						IGFL4	AHSA2P				FAM163A
																				OR10H5						LZTFL1	RBM15B								LOC728752						LOC400706	USP34				TOR1AIP2
																				OR10H1						CCR9	DCAF1								ZNF260						IGFL3	SNORA70B				TOR1AIP1
																				UCA1						FYCO1	RAD54L2								ZNF529						IGFL2	XPO1				CEP350
																				LINC01835						CXCR6	TEX264								ZNF529-AS1						IGFL2-AS1	FAM161A				QSOX1
																				CYP4F2						XCR1	GRM2								ZNF382						LOC93429	CCT4				FLJ23867
																				CYP4F11						CCR1	IQCF6								ZNF461						IGFL1	COMMD1				LHX4
																				OR10H4						CCR3	IQCF4								LINC01534						HIF3A	B3GNT2				LHX4-AS1
																				LINC00661						CCR2	IQCF3								ZNF567						PPP5C	MIR5192				ACBD6
																				LINC00905						LOC102724297	IQCF2								ZNF850						CCDC8	TMEM17				MIR3121
																				LINC01855						CCR5	IQCF5-AS1								LOC728485						PNMA8A	EHBP1				OVAAL
																				TPM4						CCRL2	IQCF5								ZNF790-AS1						PPP5D1	LOC100132215				XPR1
																				RAB8A						LINC02009	IQCF1								ZNF790						PNMA8B	OTX1				KIAA1614
																				HSH2D						LTF	RRP9								ZNF345						CALM3	DBIL5P2				KIAA1614-AS1
																				CIB3						RTP3	PARP3								ZNF829						PTGIR	WDPCP				STX6
																				FAM32A						LRRC2	GPR62								ZNF568						GNG8	MDH1				MR1
																				AP1M1						LRRC2-AS1	PCBP4								ZNF420						DACT3	UGP2				IER5
																				KLF2						TDGF1	ABHD14B								ZNF585A						DACT3-AS1	VPS54				LINC01732
																				EPS15L1						FAM240A	ABHD14A								ZNF585B						PRKD2	PELI1				LINC01699
																				CALR3						ALS2CL	ABHD14A-ACY1								ZNF383						MIR320E	LINC00309				CACNA1E
																				C19orf44						TMIE	ACY1								LINC01535						STRN4	LOC100507006				ZNF648
																				CHERP						PRSS50	RPL29														FKRP	MIR4433B				LINC01344
																				SLC35E1						PRSS46P	DUSP7														SLC1A5	MIR4433A				GLUL
																				MED26						PRSS45	LINC00696														SNAR-E	LGALSL				TEDDM1
																				SMIM7						PRSS42	POC1A														AP2S1	LINC01805				LINC00272
																				TMEM38A						MYL3																LOC101927402				RGSL1
																				NWD1						PTH1R																AFTPH				RNASEL
																				SIN3B						CCDC12																MIR4434				RGS16
																				F2RL3						NBEAL2																LINC02579				LINC01686
																				CPAMD8						NRADDP																SERTAD2				RGS8
																				HAUS8						SETD2																LINC01800				LINC01688
																				MYO9B						KIF9-AS1																LINC02245				NPL
																				SNORA118						KIF9																SLC1A4				LOC647070
																				USE1						SNORD13J																CEP68				DHX9
																				OCEL1						KLHL18																RAB1A				SHCBP1L
																				NR2F6						PTPN23																ACTR2				LAMC1
																				USHBP1						SCAP																SPRED2				LAMC1-AS1
																				BABAM1						ELP6																MIR4778				LAMC2
																				ANKLE1						CSPG5																LINC01873				NMNAT2
																				ABHD8						SMARCC1																MEIS1-AS3				SMG7-AS1
																				MRPL34						SNORD146																MEIS1				SMG7
																				DDA1						DHX30																MEIS1-AS2
																				ANO8						MIR1226																LINC01798
																				GTPBP3						MAP4
																				PLVAP						CDC25A
																				BST2						MIR4443
																				BISPR						CAMP
																				MVB12A						ZNF589
																				TMEM221						FCF1P2
																				NXNL1						NME6
																				SLC27A1						SPINK8
																				LOC100507551						MIR2115
																				PGLS						FBXW12
																				FAM129C						PLXNB1
																				COLGALT1						CCDC51
																				UNC13A						TMA7
																				MAP1S						ATRIP
																				FCHO1						TREX1
																				B3GNT3						SHISA5
																				INSL3						PFKFB4
																				JAK3						MIR6823
																				RPL18A						UCN2
																				SNORA68						COL7A1
																				SLC5A5						MIR711
																				CCDC124						UQCRC1
																				KCNN1						SNORA94
																				ARRDC2						TMEM89
																				IL12RB1						SLC26A6
																				MAST3						MIR6824
																				PIK3R2						CELSR3
																				IFI30						MIR4793
																				MPV17L2						CELSR3-AS1
																				RAB3A						NCKIPSD
																				LOC102725254						IP6K2
																				PDE4C						PRKAR2A
																				LOC729966						PRKAR2A-AS1
																				IQCN						SLC25A20
																				JUND						ARIH2OS
																				MIR3188						ARIH2
																				LSM4						P4HTM
																				PGPEP1						WDR6
																				GDF15						DALRD3
																				MIR3189						MIR425
																				LRRC25						NDUFAF3
																				SSBP4						MIR191
																				ISYNA1						IMPDH2
																				ELL						QRICH1
																				FKBP8						QARS
																				KXD1						MIR6890
																				UBA52						USP19
																				REX1BD						LAMB2
																				CRLF1						LAMB2P1
																				TMEM59L						CCDC71
																				KLHL26						KLHDC8B
																				CRTC1						C3orf84
																				COMP						CCDC36
																				UPF1						C3orf62
																				CERS1						MIR4271
																				GDF1						USP4
																				COPE						GPX1
																				DDX49						RHOA
																				HOMER3						TCTA
																				HOMER3-AS1						AMT
																				SUGP2						NICN1
																				ARMC6						DAG1
																				SLC25A42						BSN-AS2
																				TMEM161A						BSN
																				BORCS8-MEF2B						APEH
																				MEF2B						MST1
																				BORCS8						RNF123
																				RFXANK						AMIGO3
																				NR2C2AP						GMPPB
																				NCAN						IP6K1
																				HAPLN4						CDHR4
																				TM6SF2						FAM212A
																				SUGP1						UBA7
																				MAU2						MIR5193
																				GATAD2A						TRAIP
																				MIR640						CAMKV
																				TSSK6						MST1R
																				NDUFA13						MON1A
																				YJEFN3						RBM6
																				CILP2						RBM5
																				PBX4						RBM5-AS1
																				LPAR2						SEMA3F-AS1
																				GMIP						SEMA3F
																				ATP13A1						MIR566
																				ZNF101						GNAT1
																				ZNF14						SLC38A3
																				LINC00663						GNAI2
																				ZNF56						MIR5787
																				ZNF506						SEMA3B-AS1
																										SEMA3B
																										MIR6872
																										LSMEM2
																										IFRD2
																										HYAL3
																										NAT6
																										HYAL1
																										HYAL2
																										TUSC2
																										RASSF1
																										RASSF1-AS1
																										ZMYND10
																										NPRL2
																										CYB561D2
																										TMEM115
																										CACNA2D2
																										C3orf18
																										HEMK1
																										CISH
																										MAPKAPK3
																										MIR4787
																										DOCK3
																										MANF
																										RBM15B
																										DCAF1
																										RAD54L2
																										TEX264
																										GRM2
																										IQCF6
																										IQCF4
																										IQCF3
																										IQCF2
																										IQCF5-AS1
																										IQCF5
																										IQCF1
																										RRP9
																										PARP3
																										GPR62
																										PCBP4
																										ABHD14B
																										ABHD14A
																										ABHD14A-ACY1
																										ACY1
																										RPL29
																										DUSP7
																										LINC00696
																										POC1A
																										ALAS1
																										TLR9
																										TWF2
																										LOC101929054
																										PPM1M
																										WDR82
																										MIRLET7G
																										GLYCTK
																										GLYCTK-AS1
																										MIR135A1
																										DNAH1
																										BAP1
																										PHF7
																										SEMA3G
																										TNNC1
																										NISCH
																										STAB1
																										NT5DC2
																										SMIM4
																										PBRM1
																										GNL3
																										SNORD136
																										SNORD19
																										SNORD19B
																										SNORD19C
																										SNORD69
																										GLT8D1
																										SPCS1
																										NEK4
																										ITIH1
																										ITIH3
																										ITIH4
																										ITIH4-AS1
																										MUSTN1
																										TMEM110-MUSTN1
																										STIMATE
																										MIR8064
																										SFMBT1
																										RFT1
																										PRKCD
																										TKT
																										DCP1A
																										SNORD38C
																										CACNA1D
																										CHDH
																										IL17RB
																										ACTR8
																										SELENOK
																										CACNA2D3
																										ESRG
																										CACNA2D3-AS1
																										LRTM1
																										LINC02017
																										WNT5A
																										ERC2
																										ERC2-IT1
																										MIR3938
																										CCDC66
																										FAM208A
																										ARHGEF3
																										ARHGEF3-AS1
																										SPATA12
																										IL17RD
																										HESX1
																										APPL1
																										ASB14
																										LOC105377102
																										DNAH12
																										PDE12
																										ARF4
																										ARF4-AS1
																										DENND6A
																										DENND6A-DT
																										SLMAP
																										FLNB
																										FLNB-AS1
																										DNASE1L3
																										ABHD6
																										HTD2
																										RPP14
																										PXK
																										PDHB
																										KCTD6
																										ACOX2
																										FAM107A
																										FAM3D-AS1
																										FAM3D
																										C3orf67
																										C3orf67-AS1
																										LOC339902
[truncated: 144 more columns]

## Sheet: Table S3c
Table S3c
GISTIC 2.0 analysis of focal copy-number alterations in pan-cancer dataset. Partial SCNAs were removed from copy-number data prior to analysis.
cytoband	9p21.3	10q23.31	2q22.1	13q14.2	5q12.1	16q23.1	4q22.1	20p12.1	9p23	6q26	7q31.1	8p23.2	3p14.2	1p36.11	3q13.31	8q22.1	15q15.1	16p13.3	17q21.31	4q34.3	6q16.1	17q11.2	14q23.3	11q23.2	3q26.31	5q15	12p13.1	3p13	1p22.1	1q41	1p13.2	7q11.22	12q23.1	19q13.32	8q12.2	17p13.1	8p21.3	3p21.31	2q21.2	18q21.2	1p31.1	6p25.3	3q22.3	6q22.1	10q21.1	1p36.23	11q13.1	1p33	21q22.3
q value	0	0	7.5761e-307	1.3174e-251	5.4693e-256	1.6391e-206	5.8293e-191	4.3935e-112	4.0466e-113	1.5964e-88	1.9138e-86	4.2369e-85	4.3281e-133	1.6419e-84	1.2684e-87	1.0218e-72	3.8811e-54	7.7273e-51	2.6912e-70	1.0654e-47	9.7544e-62	1.4372e-70	4.7869e-36	4.6876e-36	2.8061e-33	2.2429e-58	8.4984e-27	1.1569e-62	9.3216e-61	1.1543e-24	1.1737e-44	5.3264e-18	2.5059e-17	3.8147e-30	9.0655e-30	2.3591e-17	1.0674e-17	1.8113e-55	1.7151e-58	1.0108e-16	2.7174e-23	2.3547e-09	4.2629e-22	8.8106e-26	2.7228e-07	8.2911e-14	2.0259e-06	5.7957e-09	2.4796e-05
residual q value	0	0	1.9967e-285	1.3174e-251	2.4796e-243	1.6391e-206	5.8293e-191	4.3935e-112	3.7813e-108	1.6998e-88	8.6645e-86	5.4095e-84	3.3496e-80	2.3374e-71	3.2062e-70	9.4446e-64	3.8811e-54	7.7273e-51	1.2846e-48	1.0654e-47	3.0229e-44	1.8613e-42	4.8317e-36	6.4359e-34	4.122e-33	1.7385e-29	8.647e-27	3.053e-26	8.1063e-26	1.7119e-21	1.1213e-20	5.8713e-18	2.5059e-17	5.3744e-17	1.454e-16	3.7734e-15	4.123e-15	5.4413e-15	2.0697e-14	1.0675e-13	1.6436e-09	2.3354e-09	2.6623e-08	4.9486e-08	3.7977e-07	1.8517e-06	3.224e-06	8.7501e-06	2.4796e-05
wide peak boundaries	chr9:21141750-23690570	chr10:89617158-90036731	chr2:139655617-143637838	chr13:48833767-49064807	chr5:58260298-59787985	chr16:78128899-79628583	chr4:90844993-93231324	chr20:14302876-16039144	chr9:8310705-12693402	chr6:161693099-163153207	chr7:109598910-111366370	chr8:2079140-6263357	chr3:59030529-61547330	chr1:26899126-27156381	chr3:116161663-118622337	chr8:95481914-95654321	chr15:41403242-42654022	chr16:5144019-7772379	chr17:41621306-42754874	chr4:178910407-183060693	chr6:84670006-97539812	chr17:29326736-29722618	chr14:66963153-67658112	chr11:111963481-115045540	chr3:173999806-175760559	chr5:92929447-93959666	chr12:12793888-12922322	chr3:70011169-71592506	chr1:92947252-93778434	chr1:212200566-215796672	chr1:110595046-117298070	chr7:66780207-70601215	chr12:99124001-100431888	chr19:47288175-48279236	chr8:56436731-65291147	chr17:7535461-7591760	chr8:22106166-27455113	chr3:46666794-52938546	chr2:133421383-134889663	chr18:48513327-48705371	chr1:71698947-74522473	chr6:1608632-2252425	chr3:135861017-136539591	chr6:107776565-121401911	chr10:52644085-54061437	chr1:6761586-9650416	chr11:64573763-65674139	chr1:48934713-50514967	chr21:42827479-43100702
genes in wide peak	hsa-mir-31	PTEN	LRP1B	RB1	hsa-mir-582	WWOX	FAM190A	FLRT3	PTPRD	PARK2	LRRN3	CSMD1	FHIT	ARID1A	LSAMP-AS3	KIAA1429	hsa-mir-627	RBFOX1	DUSP3	LINC00290	CGA	EVI2A	GPHN	hsa-mir-4301	NAALADL2	hsa-mir-2277	hsa-mir-613	hsa-mir-1284	SNORD21	hsa-mir-3122	hsa-mir-320b-1	AUTS2	ANKS1B	hsa-mir-3191	ASPH	ATP1B2	hsa-mir-548h-4	hsa-mir-135a-1	NCKAP5	SMAD4	NEGR1	FOXC1	PCCB	hsa-mir-3144	hsa-mir-605	hsa-mir-34a	hsa-mir-612	BEND5	TMPRSS2
	CDKN2A	KLLN		LPAR6	PDE4D			MACROD2			IMMP2L			PIGV		LOC100288748	hsa-mir-4310		FZD2		CNR1	EVI2B		DRD2	MIR4789	FAM172A	CDKN1B	FOXP1	RPL5	ATF3	hsa-mir-4256		FAM71C	C5AR1	CA8	TP53	ADRA1A	hsa-mir-566	MIR3679		NEGR1-IT1	GMDS	STAG1	hsa-mir-548b	PRKG1	RERE	hsa-mir-194-2	AGBL4
	CDKN2B				PART1			MACROD2-AS1			EIF3IP1						hsa-mir-626		GRN		EPHA7	NF1		HTR3A		POU5F2	GPR19	MIR1284	EVI5	CENPF	ADORA3			AP2S1	CYP7A1		BNIP3L	hsa-mir-4271					MSL2	AMD1	CSTF2T	CA6	ARL2
	IFNA1																GANC		ITGA2B		GABRR1	OMG		IL18		KIAA0825	MIR613		MTF2	KCNK2	ALX3			ARHGAP35	LYN		CHRNA2	hsa-mir-191						COL10A1	MIR605	ENO1	C11orf2
	IFNA2																ITPKA		MEOX1		GABRR2	MIR4733		NCAM1		MIR2277			SNORA66	PPP2R5A	AMPD1			NPAS1	MOS		DPYSL2	hsa-mir-711						FOXO3		TNFRSF9	MRPL49
	IFNA4																LTK		MPP2		HTR1E			NNMT					TMED5	PROX1	RHOC			SLC8A2	PENK		EGR3	hsa-mir-2115						FRK		SLC2A5	ZNHIT2
	IFNA5																TYRO3		MPP3		NT5E			PTS					CCDC18	PTPN14	ATP1A1			NAPA	PLAG1		EPHX2	hsa-mir-1226						FYN		PER3	CAPN1
	IFNA6																JMJD7-PLA2G4B		PPY		MAP3K7			ZBTB16					FAM69A	NSL1	ATP5F1			DHX34	RAB2A		PTK2B	ACY1						GPR6		VAMP3	CFL1
	IFNA7																CHP		PYY		RNGTT			HTR3B						RPS6KC1	CAPZA1			SAE1	RPS20		GNRH1	ALAS1						HDAC2		H6PD	CTSW
	IFNA8																OIP5		SLC4A1		TBX18			ZW10						FLVCR1	CASQ2			KPTN	SDCBP		LOXL2	AMT						KPNA5		UTS2	FAU
	IFNA10																MAPKBP1		UBTF		FHL5			RBM7						NENF	CD53			ZC3H4	TTPA		NEFM	APEH						LAMA4		PARK7	LTBP3
	IFNA13																RTF1		HDAC5		CASP8AP2			REXO2						KCTD3	CD58			CCDC9	NSMAF		NEFL	RHOA						MARCKS		CAMTA1	MAP3K11
	IFNA14																MGA		RUNDC3A		SYNCRIP			C11orf71						DTL	CHI3L2			BBC3	GGH		NKX3-1	SLC25A20						MAN1A1		SLC45A1	OVOL1
	IFNA16																VPS39		GPATCH8		SLC35A1			FAM55D						TMEM206	IGSF3			GPR77	TOX		PPP2R2A	CAMP						PLN		ERRFI1	PPP2R5B
	IFNA17																TMEM87A		FAM215A		FUT9			TTC12						BATF3	KCNA2			GLTSCR2	C8orf71		PPP3CC	CDC25A						REV3L		GPR157	RELA
	IFNA21																RPAP1		SOST		PNRC1			TEX12						SMYD2	KCNA3			GLTSCR1	SNORD54		STC1	CISH						ROS1		SPSB1	DPF2
	IFNA22P																EHD4		SLC25A39		KIAA1009			USP28						VASH2	KCNA10			EHD2	IMPAD1		ADAM7	COL7A1						SMPD2		SLC25A33	SIPA1
	MTAP																NDUFAF1		ATXN7L3		ANKRD6			TMPRSS5						ANGEL2	KCNC4			TMEM160	CHD7		TNFRSF10D	DAG1						NR2E1		SLC2A7	TM7SF2
	C9orf53																NUSAP1		C17orf53		ZNF292			BCO2						TATDN3	KCND3			MEIS3	CHCHD7		TNFRSF10C	DOCK3						TSPYL1		MIR34A	ZFPL1
	KLHL9																SPTBN5		TMUB2		MDN1			FAM55A						C1orf227	MOV10			ZNF541	FAM110B		TNFRSF10B	DUSP7						DDO		ENO1-AS1	FOSL1
	DMRTA1																PLA2G4E		TMEM101		UFL1			FAM55B						FAM71A	NGF			PRR24	TGS1		TNFRSF10A	CELSR3						SNX3			FIBP
	IFNE																EXD1		G6PC3		ORC3			ANKK1						FLVCR1-AS1	NHLH2			SNORD23	TMEM68		ENTPD4	GNAI2						CD164			NAALADL1
	MIR31																PLA2G4F		ASB16		SNORD50A			C11orf34						SNORA16B	NRAS			SNAR-E	UBXN2B		SORBS3	GNAT1						WISP3			KCNK7
	FLJ35282																PLA2G4D		LSM12		NDUFAF4			CLDN25						MIR3122	OVGP1			MIR3191	CLVS1		PNMA2	GPX1						WASF1			CDC42EP2
	MIR31HG																MIR626		CD300LG		UBE2J1			LOC100288346						PROX1-AS1	RAP1A			MIR3190	SDR16C5		ADAM28	GRM2						ZBTB24			KAT5
	CDKN2B-AS1																MIR627		NAGS		AKIRIN2			MIR4301						LINC00538	SLC16A1			LOC100505681	YTHDF3		TRIM35	HYAL1						FIG4			SSSCA1
																	OIP5-AS1		C17orf105		AKIRIN2-AS1										SYCP1				LOC286177		RHOBTB2	IMPDH2						TRAF3IP2			EHD1
																	JMJD7		FAM171A2		RARS2										TSHB				NKAIN3		SLC39A14	ITIH1						SEC63			CCDC85B
																	PLA2G4B		C17orf104		C6orf162										WNT2B				LOC286184		ADAMDEC1	ITIH3						CDK19			ATG2A
																	MIR4310		C17orf65		LYRM2										CSDE1				UG0898H09		SLC25A37	ITIH4						TSPYL4			FAM89B
																					SNX14										SLC16A4				LOC100130298		KCTD9	LAMB2						BRD7P3			POLA2
																					RRAGD										LRIG2				LOC100507632		PIWIL2	MAP4						ASF1A			SAC3D1
																					BACH2										TSPAN2				LOC100507651		BIN3	MST1						SESN1			SNX15
																					C6orf164										BCAS2				MIR4470		KIAA1967	MST1R						OSTM1			EFEMP2
																					MANEA										CEPT1						PDLIM2	MYL3						DSE			CDC42BPG
																					GPR63										HBXIP						EBF2	PFKFB4						TUBE1			SCYL1
																					SPACA1										AP4B1						DOCK5	PLXNB1						CDC40			MUS81
																					GJA10										PHTF1						FLJ14107	PRKAR2A						RWDD1			FRMD8
																					MRAP2										DDX20						STMN4	PTH1R						SOBP			RNASEH2C
																					PM20D2										PTPN22						CHMP7	QARS						GOPC			SYVN1
																					SRSF12										CHIA						NKX2-6	RPL29						MICAL1			DKFZp761E198
																					C6orf165										TRIM33						PEBP4	SEMA3F						FAM184A			CDCA5
																					C6orf163										RSBN1						CDCA2	SMARCC1						ARMC2			BATF2
																					GJB7										ST7L						R3HCC1	NEK4						RPF2			GPHA2
																					SNHG5										SLC22A15						LOC254896	TCTA						SLC22A16			TIGD3
																					TSG1										LRIF1						LOC286059	TNNC1						KIAA1919			LOC254100
																					SNORD50B										CTTNBP2NL						LOC389641	UBA7						GTF3C6			EHBP1L1
																					MIR4464										FAM212B						C8orf58	USP4						NUS1			SNX32
																					MIR4643										OLFML3						LOC100507156	UQCRC1						SLC16A10			C11orf85
																															RBM15							IFRD2						CCDC162P			SLC25A45
																															DCLRE1B							MAPKAPK3						AKD1			NEAT1
																															WDR77							SEMA3B						NT5DC1			MALAT1
																															DENND2D							MANF						FAM26D			SPDYC
																															SIKE1							BAP1						ZUFSP			PCNXL3
																															VANGL1							HYAL3						FAM162B			MIR192
																															PROK1							HYAL2						HS3ST5			MIR194-2
																															ATP1A1OS							BSN						GPRC6A			SLC22A20
																															MAB21L3							RRP9						RFX6			MIR612
																															DRAM2							CACNA2D2						SLC35F1			LOC100130348
																															C1orf88							VPRBP						VGLL2			ARL2-SNX15
																															C1orf162							IP6K1						LACE1			MIR4489
																															SYT6							PARP3						FAM26E			MIR4690
																															RP11-165H20.1							RBM6						MCM9
																															DENND2C							RBM5						SCML4
																															UBL4B							NME6						CEP57L1
																															HIPK1							TRAIP						PPIL6
																															AKR7A2P1							ARIH2						LOC285758
																															MAGI3							NPRL2						FLJ34503
																															FAM19A3							CSPG5						DCBLD1
																															PPM1J							USP19						LOC285762
																															SLC6A17							SLC38A3						RSPH4A
																															LOC440600							CYB561D2						LINC00222
																															BCL2L15							TMEM115						CEP85L
																															PGCP1							WDR6						FAM26F
																															CYMP							RASSF1						GSTM2P1
																															LOC643441							NISCH						RFPL4B
																															LOC100129269							TREX1						C6orf225
																															LOC100287722							TUSC2						TRAF3IP2-AS1
																															MIR320B1							TWF2						MIR548B
																															MIR4256							DHX30						TPI1P3
																															LOC100506343							SCAP						C6orf186
																																						LAMB2P1						BET3L
																																						RAD54L2						LOC100287632
																																						STAB1
																																						NBEAL2
																																						KLHL18
																																						NAT6
																																						ABHD14A
																																						POC1A
																																						NDUFAF3
																																						PTPN23
																																						DNAH1
																																						GNL3
																																						SPCS1
																																						SETD2
																																						PRSS50
																																						RBM15B
																																						GMPPB
																																						C3orf18
																																						SHISA5
																																						ZMYND10
																																						TEX264
																																						CCDC72
																																						ZNF589
																																						HEMK1
																																						IP6K2
																																						NCKIPSD
																																						PHF7
																																						TLR9
																																						P4HTM
																																						C3orf75
																																						QRICH1
																																						DALRD3
																																						PBRM1
																																						GLT8D1
																																						SEMA3G
																																						PCBP4
																																						RNF123
																																						KIF9
																																						CCDC71
																																						NT5DC2
																																						SLC26A6
																																						CAMKV
																																						CCDC51
																																						WDR82
																																						ATRIP
																																						NICN1
																																						MON1A
																																						ABHD14B
																																						UCN2
																																						GPR62
																																						IQCF1
																																						GLYCTK
																																						PPM1M
																																						C3orf45
																																						CCDC12
																																						KLHDC8B
																																						ALS2CL
																																						TMIE
																																						FBXW12
																																						FLJ39534
																																						CCDC36
																																						PRSS42
																																						C3orf62
																																						TMEM110
																																						PRSS45
																																						AMIGO3
																																						CDHR4
																																						FAM212A
																																						IQCF2
																																						IQCF5
																																						MUSTN1
																																						IQCF3
																																						MIRLET7G
																																						MIR135A1
																																						MIR191
																																						TMEM89
																																						IQCF6
																																						C3orf78
																																						MIR425
																																						SPINK8
																																						C3orf71
																																						LOC646498
																																						SNORD19
																																						SNORD69
																																						SNORD19B
																																						C3orf74
																																						NRADDP
																																						BSN-AS2
																																						PRSS46
																																						MIR1226
																																						MIR711
																																						MIR4271
																																						IQCF4
																																						ABHD14A-ACY1
																																						TMEM110-MUSTN1
																																						MIR4793
																																						MIR4787
																																						MIR4443
																																						LUST
[truncated: 17 more columns]

## Sheet: Table S3d
Table S3d
List of genes spanning over 1 Mb, their closest common fragile sites (Gao et al. 2016), and ranking within the top 25 pan-cancer BrISCUT and GISTIC 2.0 analyses.
				Top 25 in PANCAN (Ranking)
Size Ranking	Gene	Location	Closest Common Fragile Site (CFS)	BrISCUT	GISTIC 2.0
1	CNTNAP2	7q35	FRA7I
2	DMD	Xp21.1	FRAXC
3	CSMD1	8p23.2	FRA8B		12
4	LRP1B	2q22.1	FRA2F		3
5	CTNNA3	10q21.3	FRA10D
6	NRXN3	14q24.3	FRA14C
7	RBFOX1	16p13.2			18
8	DAB1	1p32.3	FRA1B
9	PDE4D	5q11.2			5
10	FHIT	3p14.2	FRA3B		13
11	FAM190A	4q22.1			7
12	GPC5	13q31.3	FRA13D
13	GRID2	4q22.3	FRA4G
14	DLG2	11q14.1	FRA11F
15	AIP1	7q21.11	FRA7E
16	DPP10	2q14.1
17	PARK2	6q26	FRA6E		10
18	IL1RAPL1	Xp21.2	FRAXC
19	PRKG1	10q21.1	FRA10C
20	EB1	12q23.1	FRA12C
21	CSMD3	8q23.2	FRA8C
22	IL1RAPL2	Xq22.3
23	AUTS2	7q11.22	FRA7J
24	DCC	18q21.1	FRA18B
25	GPC6	13q31.3	FRA13D
26	CDH13	16q23.2	FRA16D
27	ERBB4	2q34	FRA2I
28	ASIC2	17q11.2
29	CTNNA2	2p12	FRA2E
30	WDSUB1	2q24
31	PTPRT	20q12
32	WWOX	16q23.2	FRA16D		6
33	NRXN1	2p16.3	FRA2D
34	CADM2	3p12.1
35	CDH12	5p14.3	FRA5E
36	PAR3L	2q33.3	FRA2I
37	PTPRN2	7q36.3	FRA7I
38	SOX5	12p12.1
39	NKAIN2	6q22.31	FRA6F

## Sheet: Table S3e
Table S3e
List of restricted negative selection peaks from the pan-cancer BrISCUT analysis. The peaks are sorted from highest to lowest fraction of samples that possessed overlapping focal SCNAs in the opposite direction to a pSCNA with evidence of negative selection (e.g. focal deletions on a partial amplification). If the BrISCUT peak contains genes from GISTIC 2.0 analysis, the overlapping genes are als…
type	arm	direction	telcent	code	genes	num_genes	peak_region	has_focal_SCNAs	total_affected	ratio	tumors_with_focal	peak_in_GISTIC	genes_in_GISTIC	GISTIC_region
PANCAN	11q	del	tel	p-rn-lp-ln	CEP126,C11orf70,YAP1,BIRC3,BIRC2,TMEM123,LOC101928424,LOC102723838,MMP7,MMP20,MMP27	11	chr11:101811726-102578772	67	161	0.416149	TCGA-04-1338-01,TCGA-04-1348-01,TCGA-04-1514-01,TCGA-04-1536-01,TCGA-04-1651-01,TCGA-05-4422-01,TCGA-05-5425-01,TCGA-09-1662-01,TCGA-09-1665-01,TCGA-09-1669-01,TCGA-09-1675-01,TCGA-09-2054-01,TCGA-10-0931-01,TCGA-10-0938-01,TCGA-13-0714-01,TCGA-13-0724-01,TCGA-13-0762-01,TCGA-13-0791-01,TCGA-13-0791-02,TCGA-13-0794-01,TCGA-13-0803-01,TCGA-13-0890-01,TCGA-13-0901-01,TCGA-13-0908-01,TCGA-13-0913-01…	TRUE	BIRC2, BIRC3, MMP7, MMP20, YAP1, TMEM123	chr11:101984748-102501735
PANCAN	8q	del	tel	n	LOC105375744,SQLE,WASHC5,NSMCE2,TRIB1,LINC00861,LOC101927657,FAM84B,PCAT1,PCAT2,PRNCR1,CASC19,CCAT1,CASC21,CASC8,CCAT2,POU5F1B,CASC11,MYC,PVT1,MIR1204,TMEM75,MIR1205,MIR1206,MIR1207,MIR1208,LINC00824	27	chr8:125999170-129681896	81	197	0.411168	TCGA-02-0014-01,TCGA-02-0104-01,TCGA-04-1347-01,TCGA-04-1348-01,TCGA-04-1353-01,TCGA-04-1362-01,TCGA-04-1536-01,TCGA-04-1648-01,TCGA-04-1651-01,TCGA-04-1654-01,TCGA-05-4410-01,TCGA-05-4422-01,TCGA-05-4434-01,TCGA-06-5416-01,TCGA-06-6389-01,TCGA-06-6693-01,TCGA-08-0518-01,TCGA-08-0529-01,TCGA-09-0364-01,TCGA-09-1665-01,TCGA-09-1667-01,TCGA-09-1673-01,TCGA-09-1675-01,TCGA-09-2043-01,TCGA-09-2044-01…	TRUE	MYC	chr8:128738060-128770551
PANCAN	11q	del	tel	p-rn	PPFIA1,MIR548K	2	chr11:70071718-70240415	335	907	0.36935	TCGA-02-0014-01,TCGA-02-0451-01,TCGA-04-1351-01,TCGA-04-1360-01,TCGA-04-1362-01,TCGA-04-1514-01,TCGA-04-1516-01,TCGA-04-1536-01,TCGA-04-1542-01,TCGA-04-1649-01,TCGA-04-1654-01,TCGA-05-4389-01,TCGA-05-4433-01,TCGA-06-0190-02,TCGA-09-0367-01,TCGA-09-1667-01,TCGA-09-1673-01,TCGA-10-0931-01,TCGA-10-0938-01,TCGA-13-0755-01,TCGA-13-0760-01,TCGA-13-0791-01,TCGA-13-0791-02,TCGA-13-0802-01,TCGA-13-0886-01…	FALSE
PANCAN	11p	del	tel	n-rp-ln	CAPRIN1,NAT10,ABTB2,CAT,ELF5,EHF,APIP,PDHX,MIR1343,LOC100507144,CD44,SNORD164,SLC1A2,PAMR1	14	chr11:34098912-35504853	73	213	0.342723	TCGA-02-0037-01,TCGA-02-0290-01,TCGA-02-0451-01,TCGA-04-1362-01,TCGA-04-1365-01,TCGA-04-1514-01,TCGA-04-1525-01,TCGA-04-1536-01,TCGA-04-1649-01,TCGA-06-0145-01,TCGA-06-0148-01,TCGA-06-2569-01,TCGA-06-5856-01,TCGA-10-0928-01,TCGA-10-0931-01,TCGA-12-0616-01,TCGA-12-0619-01,TCGA-13-0723-01,TCGA-13-0751-01,TCGA-13-0792-01,TCGA-13-0794-01,TCGA-13-0803-01,TCGA-13-0807-01,TCGA-13-0888-01,TCGA-13-0889-01…	TRUE	CAT, CD44, ELF5, SLC1A2, PDHX, EHF, APIP, MIR1343	chr11:34471262-35368699
PANCAN	10q	del	tel	p-rn	KCNMA1,KCNMA1-AS2,KCNMA1-AS3,DLG5,DLG5-AS1,POLR3A,RPS24,LINC00856,LINC00595,ZMIZ1-AS1,ZMIZ1,PPIF,ZCCHC24,LOC729815,EIF5AL1,SFTPA2,SFTPA1,LOC105378385,BEND3P3,NUTM2B-AS1,NUTM2B,LOC642361,NUTM2E,BMS1P21,MBL1P,SFTPD,TMEM254-AS1,TMEM254,PLAC9,ANXA11,LINC00857,LOC100130698	32	chr10:78812948-82012098	59	182	0.324176	TCGA-02-0015-01,TCGA-02-0258-01,TCGA-04-1338-01,TCGA-04-1342-01,TCGA-04-1365-01,TCGA-04-1517-01,TCGA-04-1644-01,TCGA-04-1649-01,TCGA-06-0146-01,TCGA-06-0154-01,TCGA-06-0182-01,TCGA-06-0402-01,TCGA-06-0645-01,TCGA-06-0743-01,TCGA-06-2563-01,TCGA-08-0518-01,TCGA-09-1665-01,TCGA-09-1667-01,TCGA-12-1093-01,TCGA-12-1099-01,TCGA-12-3650-01,TCGA-13-0714-01,TCGA-13-0725-01,TCGA-13-0751-01,TCGA-13-0768-01…	TRUE	ANXA11, RPS24, SFTPD, MBL1P, DLG5, PPIF, POLR3A, ZMIZ1, FAM213A, EIF5AL1, LOC219347, PLAC9, ZCCHC24, LOC283050, LOC439990, LOC642361, LOC650623, SFTPA1, SFTPA2, LOC100128292, LOC100132987, LOC100288974	chr10:79411741-82012098
PANCAN	11p	amp	tel	n-ln	EPS8L2,TALDO1,GATD1,LOC171391,CEND1,SLC25A22,PANO1,PIDD1,RPLP2,SNORA52,PNPLA2,CRACR2B,CD151,POLR2L,TSPAN4,CHID1,AP2A2,MUC6,LOC101927503,MUC2,MUC5AC,MUC5B,MIR6744,TOLLIP,TOLLIP-AS1,BRSK2,MOB2,DUSP8,KRTAP5-AS1,KRTAP5-1,KRTAP5-2,KRTAP5-3,KRTAP5-4,KRTAP5-5,FAM99A,FAM99B,KRTAP5-6,IFITM10,CTSD,SYT8,TNNI2,LSP1,MIR4298,MIR7847,LINC01150	45	chr11:724088-1920255	13	42	0.309524	TCGA-05-4415-01,TCGA-06-0409-01,TCGA-08-0380-01,TCGA-10-0936-01,TCGA-13-1405-01,TCGA-13-1487-01,TCGA-13-1489-02,TCGA-13-1511-01,TCGA-14-0862-01,TCGA-25-1318-01,TCGA-29-2429-01,TCGA-30-1866-01,TCGA-34-2609-01,TCGA-36-2529-01,TCGA-36-2544-01,TCGA-44-7670-01,TCGA-46-6026-01,TCGA-4Z-AA89-01,TCGA-55-6981-01,TCGA-55-8505-01,TCGA-55-8616-01,TCGA-62-A46O-01,TCGA-66-2757-01,TCGA-98-A538-01,TCGA-A4-7287-01…	FALSE
PANCAN	1p	del	tel	n-lp-rn	HCRTR1,PEF1,COL16A1,ADGRB2,MIR4254,SPOCD1,PTP4A2,KHDRBS1,TMEM39B,MIR5585,KPNA6,TXLNA,CCDC28B,IQCC,DCDC2B,TMEM234,EIF3I,MTMR9LP,FAM167B,LCK,HDAC1,MARCKSL1,FAM229A,TSSK3,BSDC1,ZBTB8B,ZBTB8A,ZBTB8OS,RBBP4,SYNC,KIAA1522,YARS,S100PBP,FNDC5,HPCA,TMEM54,RNF19B,AK2,AZIN2,TRIM62,ZNF362,A3GALT2,PHC2,MIR3605,LOC101929464,ZSCAN20,CSMD2,HMGB4,CSMD2-AS1,C1orf94	50	chr1:32082000-34772705	97	320	0.303125	TCGA-04-1331-01,TCGA-04-1351-01,TCGA-04-1361-01,TCGA-04-1365-01,TCGA-04-1367-01,TCGA-04-1517-01,TCGA-04-1638-01,TCGA-04-1648-01,TCGA-04-1649-01,TCGA-04-1651-01,TCGA-05-4396-01,TCGA-05-4422-01,TCGA-06-0175-01,TCGA-06-0237-01,TCGA-06-2558-01,TCGA-08-0244-01,TCGA-09-0367-01,TCGA-09-1673-01,TCGA-09-2044-01,TCGA-09-2055-01,TCGA-10-0934-01,TCGA-10-0935-01,TCGA-12-0670-01,TCGA-12-3648-01,TCGA-13-0755-01…	FALSE
PANCAN	8p	del	tel	p-rn-lp-rn	LINC01605,ZNF703,LOC101929622,LOC102723701,ERLIN2,LOC728024,PLPBP,ADGRA2,BRF2,RAB11FIP1,GOT1L1,ADRB3,EIF4EBP1,ASH2L,STAR,LSM1,BAG4,DDHD2,PLPP5,NSD3,LETM2	21	chr8:37211584-38250450	205	691	0.296671	TCGA-04-1341-01,TCGA-04-1350-01,TCGA-04-1364-01,TCGA-05-4389-01,TCGA-05-4420-01,TCGA-05-5425-01,TCGA-06-0127-01,TCGA-09-0367-01,TCGA-12-0691-01,TCGA-13-0724-01,TCGA-13-0730-01,TCGA-13-0751-01,TCGA-13-0764-01,TCGA-13-0799-01,TCGA-13-0807-01,TCGA-13-0887-01,TCGA-13-0888-01,TCGA-13-0901-01,TCGA-13-0908-01,TCGA-13-0910-01,TCGA-13-0920-01,TCGA-13-1408-01,TCGA-13-1481-01,TCGA-13-1487-01,TCGA-13-1499-01…	TRUE	WHSC1L1, LETM2	chr8:38204079-38267505
PANCAN	3q	del	tel	n	CLDN11,SLC7A14,LOC101928583,RPL22L1,EIF5A2,SLC2A2,TNIK,MIR569,PLD1,TMEM212,TMEM212-AS1,FNDC3B,GHSR	13	chr3:170147874-172215574	73	247	0.295547	TCGA-02-0332-01,TCGA-04-1336-01,TCGA-04-1338-01,TCGA-04-1356-01,TCGA-04-1357-01,TCGA-04-1367-01,TCGA-04-1514-01,TCGA-04-1516-01,TCGA-04-1536-01,TCGA-04-1652-01,TCGA-04-1654-01,TCGA-05-4250-01,TCGA-05-4398-01,TCGA-05-4417-01,TCGA-06-0171-02,TCGA-06-0644-01,TCGA-06-0878-01,TCGA-06-1087-01,TCGA-06-6695-01,TCGA-09-0367-01,TCGA-09-1662-01,TCGA-09-1665-01,TCGA-09-1673-01,TCGA-09-2050-01,TCGA-09-2051-01…	FALSE
PANCAN	4q	amp	tel	n-rn	LINC01216,PPP3CA,MIR8066,MIR1255A,FLJ20021,BANK1,SLC39A8,LOC105377621,NFKB1,MANBA,LOC102723704,UBE2D3,LOC105377348,CISD2,SLC9B1,SLC9B2,BDH2,CENPE,LINC02428,TACR3,CXXC4,CXXC4-AS1,TET2,TET2-AS1,PPA2,ARHGEF38,ARHGEF38-IT1,INTS12,GSTCD,LOC101929529,NPNT,LOC101929577,TBCK,AIMP1,GIMD1,LINC02173,DKK2,PAPSS1,SGMS2,LOC101929595,CYP2U1,HADH,LEF1,LEF1-AS1,RPL34-AS1,LOC101929621,RPL34,OSTC,ETNPPL	49	chr4:101499847-109707618	20	68	0.294118	TCGA-02-0006-01,TCGA-02-0010-01,TCGA-02-0024-01,TCGA-02-0028-01,TCGA-02-0289-01,TCGA-02-2466-01,TCGA-04-1331-01,TCGA-04-1341-01,TCGA-04-1349-01,TCGA-04-1362-01,TCGA-04-1530-01,TCGA-04-1651-01,TCGA-05-4389-01,TCGA-05-4390-01,TCGA-06-0877-01,TCGA-08-0386-01,TCGA-09-1668-01,TCGA-09-1669-01,TCGA-09-1675-01,TCGA-09-2053-01,TCGA-13-0714-01,TCGA-13-0751-01,TCGA-13-0757-01,TCGA-13-0758-01,TCGA-13-0799-01…	FALSE
PANCAN	19q	del	tel	n-lp-ln-ln	USP29	1	chr19:57379036-57633133	26	92	0.282609	TCGA-04-1514-01,TCGA-09-1667-01,TCGA-09-2044-01,TCGA-12-1602-01,TCGA-13-0760-01,TCGA-13-0764-01,TCGA-13-0791-01,TCGA-13-0791-02,TCGA-13-0794-01,TCGA-13-1483-01,TCGA-13-1494-01,TCGA-13-1495-01,TCGA-13-1504-01,TCGA-18-3414-01,TCGA-22-5478-01,TCGA-23-1123-01,TCGA-24-1428-01,TCGA-24-1551-01,TCGA-24-1603-01,TCGA-24-1843-01,TCGA-24-2019-01,TCGA-24-2029-01,TCGA-25-1313-01,TCGA-25-1630-01,TCGA-25-1633-01…	FALSE
PANCAN	3q	del	tel	n-ln	LINC01994,LINC01995,ATP11B,DCUN1D1,MCCC1,LAMP3,MCF2L2,B3GNT5,LINC00888,SNORA63D,SNORA63E,KLHL6,KLHL6-AS1,KLHL24,YEATS2,YEATS2-AS1,MAP6D1,PARL,ABCC5,ABCC5-AS1,HTR3D,HTR3C,HTR3E-AS1,HTR3E,EIF2B5,DVL3,AP2M1	27	chr3:181815848-183897844	52	187	0.278075	TCGA-02-0021-01,TCGA-02-0048-01,TCGA-02-0330-01,TCGA-02-0332-01,TCGA-04-1336-01,TCGA-04-1338-01,TCGA-04-1356-01,TCGA-04-1357-01,TCGA-04-1362-01,TCGA-04-1514-01,TCGA-04-1654-01,TCGA-06-0171-02,TCGA-06-0402-01,TCGA-06-0644-01,TCGA-06-0743-01,TCGA-06-0745-01,TCGA-06-0878-01,TCGA-06-1087-01,TCGA-06-1804-01,TCGA-06-2563-01,TCGA-06-5415-01,TCGA-06-6695-01,TCGA-08-0353-01,TCGA-08-0358-01,TCGA-09-0367-01…	TRUE	SOX2, MCF2L2, ATP11B, LAMP3, DCUN1D1, MCCC1, B3GNT5, SOX2-OT, FLJ46066	chr3:181031668-183065606
PANCAN	17p	del	tel	p-rp-rn-lp-rn	EPN2,EPN2-IT1,EPN2-AS1	3	chr17:19165168-19227335	35	128	0.273438	TCGA-02-0321-01,TCGA-05-4402-01,TCGA-06-0206-01,TCGA-09-1673-01,TCGA-13-0801-01,TCGA-13-0901-01,TCGA-18-3410-01,TCGA-19-5950-01,TCGA-24-1842-01,TCGA-27-2526-01,TCGA-29-1701-01,TCGA-2A-A8VV-01,TCGA-2J-AABO-01,TCGA-2L-AAQA-01,TCGA-2Y-A9GZ-01,TCGA-32-2616-01,TCGA-39-5034-01,TCGA-3B-A9I3-01,TCGA-3C-AALJ-01,TCGA-41-2572-01,TCGA-42-2589-01,TCGA-43-6770-01,TCGA-49-4510-01,TCGA-4N-A93T-01,TCGA-4Z-AA7R-01…	TRUE	hsa-mir-1180, ALDH3A1, ALDH3A2, MFAP4, MAPK7, RNF112, ULK2, GRAP, AKAP10, EPN2, B9D1, SLC47A1, SLC5A10, SLC47A2, GRAPL, FAM83G, SNORA59B, SNORA59A, MIR1180	chr17:18860536-19831410
PANCAN	5p	del	tel	n-rn	NADK2,RANBP3L,SLC1A3,NIPBL-AS1,NIPBL,C5orf42,LOC105374727,NUP155,WDR70,GDNF,GDNF-AS1,LINC02110,LINC02107,LINC02119,EGFLAM,EGFLAM-AS4,EGFLAM-AS2,LIFR,LIFR-AS1,MIR3650,OSMR-AS1,LINC01265,OSMR,RICTOR,FYB1,C9,DAB2,LINC02104,LINC00603	29	chr5:36184213-40566003	21	77	0.272727	TCGA-04-1348-01,TCGA-04-1364-01,TCGA-04-1525-01,TCGA-04-1651-01,TCGA-05-4398-01,TCGA-05-5715-01,TCGA-08-0245-01,TCGA-09-1673-01,TCGA-09-2051-01,TCGA-09-2053-01,TCGA-12-0778-01,TCGA-13-0724-01,TCGA-13-0768-01,TCGA-13-0791-01,TCGA-13-0791-02,TCGA-13-0797-01,TCGA-13-0805-01,TCGA-13-0891-01,TCGA-13-0911-01,TCGA-13-1487-01,TCGA-13-1496-01,TCGA-13-2059-01,TCGA-13-A5FT-01,TCGA-14-0871-01,TCGA-18-3419-01…	FALSE
PANCAN	1p	amp	tel	n	FAM110D,ZNF593,CNKSR1,CATSPER4,LOC101928303,CEP85,SH3BGRL3,UBXN11,CD52,CRYBG2,ZNF683,LIN28A,DHDDS,LOC101928324,HMGN2,RPS6KA1,MIR1976,LOC101928728,ARID1A,PIGV,ZDHHC18,SFN,GPN2,GPATCH3,NR0B2,NUDC,KDF1,TRNP1,FAM46B,SLC9A1,WDTC1,TMEM222,ACTG1P20,SYTL1,MAP3K6,FCN3,CD164L2,GPR3,WASF2,AHDC1	40	chr1:26478393-27903342	75	280	0.267857	TCGA-02-0016-01,TCGA-02-0333-01,TCGA-02-0446-01,TCGA-04-1337-01,TCGA-04-1343-01,TCGA-04-1350-01,TCGA-04-1351-01,TCGA-04-1353-01,TCGA-04-1356-01,TCGA-04-1361-01,TCGA-04-1367-01,TCGA-04-1517-01,TCGA-04-1530-01,TCGA-04-1536-01,TCGA-04-1542-01,TCGA-04-1654-01,TCGA-05-4425-01,TCGA-05-5429-01,TCGA-06-0168-01,TCGA-06-0188-01,TCGA-06-0409-01,TCGA-06-2561-01,TCGA-06-2562-01,TCGA-06-5418-01,TCGA-08-0375-01…	TRUE	ARID1A, PIGV	chr1:26899126-27156381
PANCAN	12p	del	tel	p-rn	LRMP,CASC1,ETFRF1,KRAS,LMNTD1,MIR4302,RASSF8-AS1,RASSF8,BHLHE41,SSPN,ITPR2	11	chr12:25209870-26622098	53	198	0.267677	TCGA-02-0014-01,TCGA-04-1338-01,TCGA-04-1342-01,TCGA-04-1517-01,TCGA-04-1649-01,TCGA-04-1652-01,TCGA-05-4249-01,TCGA-05-4433-01,TCGA-06-0129-01,TCGA-06-2561-01,TCGA-06-6700-01,TCGA-08-0245-01,TCGA-08-0531-01,TCGA-09-1665-01,TCGA-09-1667-01,TCGA-09-2044-01,TCGA-09-2051-01,TCGA-09-2054-01,TCGA-10-0926-01,TCGA-10-0928-01,TCGA-10-0935-01,TCGA-13-0717-01,TCGA-13-0730-01,TCGA-13-0755-01,TCGA-13-0760-01…	TRUE	KRAS, CASC1, LYRM5	chr12:25265033-25506286
PANCAN	10p	del	tel	n	AKR1E2,AKR1C6P,AKR1C1,AKR1C2,AKR1C3,AKR1C8P,AKR1C4,LINC02561,UCN3,TUBAL3,NET1,CALML5,CALML3-AS1,CALML3,LOC105376382,ASB13,FAM208B,GDI2,ANKRD16,FBXO18,IL15RA,IL2RA,RBM17,PFKFB3,MIR3155A,MIR3155B,LOC399715,LOC399716,PRKCQ	29	chr10:4829934-6500292	44	167	0.263473	TCGA-04-1348-01,TCGA-05-4389-01,TCGA-09-1665-01,TCGA-09-1674-01,TCGA-10-0927-01,TCGA-12-0818-01,TCGA-12-1099-01,TCGA-13-0766-01,TCGA-13-0794-01,TCGA-13-0885-01,TCGA-13-0889-01,TCGA-13-0893-01,TCGA-13-0916-01,TCGA-13-1487-01,TCGA-13-1491-01,TCGA-13-1510-01,TCGA-13-A5FT-01,TCGA-14-0871-01,TCGA-14-1827-01,TCGA-18-3415-01,TCGA-22-5485-01,TCGA-23-1021-01,TCGA-23-1030-01,TCGA-23-1119-01,TCGA-23-1121-01…	TRUE	CALML3, GDI2, NET1, CALML5, FAM208B, ASB13	chr10:5486412-5827073
PANCAN	17q	del	tel	n	LINC01483,LINC01497,LINC01028,KCNJ16,KCNJ2-AS1,KCNJ2	6	chr17:67895465-68616595	75	297	0.252525	TCGA-04-1338-01,TCGA-04-1652-01,TCGA-05-4397-01,TCGA-05-4420-01,TCGA-06-0206-01,TCGA-10-0930-01,TCGA-13-0889-01,TCGA-13-0901-01,TCGA-13-0912-01,TCGA-13-1487-01,TCGA-13-1500-01,TCGA-13-1506-01,TCGA-13-1509-01,TCGA-18-3415-01,TCGA-18-3421-01,TCGA-22-4595-01,TCGA-23-1116-01,TCGA-23-1118-01,TCGA-23-2072-01,TCGA-24-0975-01,TCGA-24-1103-01,TCGA-24-1422-01,TCGA-24-1546-01,TCGA-24-1557-01,TCGA-24-1558-01…	FALSE
PANCAN	16p	del	tel	n	ATF7IP2,LINC01290,EMP2,TEKT5,NUBP1,TVP23A,CIITA,DEXI,CLEC16A	9	chr16:10512834-11106707	86	347	0.247839	TCGA-02-0009-01,TCGA-02-0086-01,TCGA-04-1348-01,TCGA-04-1536-01,TCGA-05-4382-01,TCGA-05-4427-01,TCGA-06-0157-01,TCGA-06-2558-01,TCGA-06-5856-01,TCGA-06-A5U1-01,TCGA-09-2044-01,TCGA-10-0936-01,TCGA-12-3648-01,TCGA-13-0760-01,TCGA-13-0893-01,TCGA-13-0910-01,TCGA-13-0912-01,TCGA-13-0913-01,TCGA-13-1492-01,TCGA-13-1495-01,TCGA-13-1510-01,TCGA-13-1511-01,TCGA-20-0987-01,TCGA-21-1075-01,TCGA-21-5787-01…	FALSE
PANCAN	4q	del	tel	p-rn	NPFFR2,ADAMTS3,COX18,ANKRD17,ALB,AFP,AFM,LINC02499,RASSF6,CXCL8,CXCL6,PF4V1	12	chr4:72994295-74723014	75	304	0.246711	TCGA-04-1332-01,TCGA-04-1638-01,TCGA-04-1646-01,TCGA-04-1652-01,TCGA-05-4420-01,TCGA-05-5423-01,TCGA-09-1666-01,TCGA-09-1674-01,TCGA-09-2044-01,TCGA-09-2054-01,TCGA-10-0938-01,TCGA-13-0791-01,TCGA-13-0791-02,TCGA-13-0794-01,TCGA-13-0797-01,TCGA-13-0799-01,TCGA-13-0805-01,TCGA-13-0887-01,TCGA-13-0906-01,TCGA-13-1408-01,TCGA-13-1410-01,TCGA-13-1497-01,TCGA-13-1499-01,TCGA-13-1504-01,TCGA-13-2071-01…	TRUE	AFM, AFP, ALB, IL8, ANKRD17, RASSF6, COX18	chr4:73530210-74636857
PANCAN	12q	del	tel	n	RAP1B,LOC100507250,NUP107,SLC35E3,LOC100130075,MDM2,CPM,CPSF6,MIR1279,LYZ,YEATS4,FRS2,SNORA113,MIR3913-1,MIR3913-2,CCT2,LRRC10,BEST3,RAB3IP,MYRFL,LINC01481,CNOT2,KCNMB4,PTPRB,PTPRR,TSPAN8,LGR5,ZFC3H1,THAP2,TMEM19	30	chr12:69022295-72088228	147	608	0.241776	TCGA-02-0006-01,TCGA-02-0039-01,TCGA-02-0052-01,TCGA-02-0071-01,TCGA-02-0099-01,TCGA-02-0102-01,TCGA-02-0258-01,TCGA-02-0266-01,TCGA-02-0321-01,TCGA-02-0330-01,TCGA-02-0337-01,TCGA-04-1337-01,TCGA-04-1338-01,TCGA-04-1341-01,TCGA-04-1346-01,TCGA-04-1348-01,TCGA-04-1357-01,TCGA-04-1517-01,TCGA-04-1646-01,TCGA-05-4382-01,TCGA-05-4433-01,TCGA-06-0129-01,TCGA-06-0138-01,TCGA-06-0140-01,TCGA-06-0152-01…	TRUE	CPM, MDM2	chr12:69190696-69260427
PANCAN	19q	del	tel	n-lp-rn	PAK4,NCCRP1,SYCN,IFNL3,IFNL4,IFNL2,IFNL1,LRFN1,GMFG,SAMD4B,PAF1,MED29,ZFP36,MIR4530,PLEKHG2,RPS16,SUPT5H	17	chr19:39622639-39955454	80	331	0.241692	TCGA-02-0080-01,TCGA-04-1346-01,TCGA-04-1361-01,TCGA-05-4389-01,TCGA-06-0175-01,TCGA-06-A6S1-01,TCGA-09-1674-01,TCGA-10-0927-01,TCGA-12-0691-01,TCGA-12-1097-01,TCGA-12-1099-01,TCGA-13-0730-01,TCGA-13-0757-01,TCGA-13-0760-01,TCGA-13-0791-01,TCGA-13-0791-02,TCGA-13-0797-01,TCGA-13-0800-01,TCGA-13-0802-01,TCGA-13-0807-01,TCGA-13-0890-01,TCGA-13-0916-01,TCGA-13-1407-01,TCGA-13-1410-01,TCGA-13-1484-01…	TRUE	RPS16, SUPT5H, ZFP36, GMFG, PAF1, SAMD4B, MED29, LRFN1, PLEKHG2, IL28A, IL28B, IL29, MIR4530	chr19:39697975-39939990
PANCAN	5p	del	tel	n	DNAH5,TRIO,SNORD170,FAM105A,OTULIN,ANKH,LOC100130744,MIR4637,LINC02149,FBXL7,CTD-2350J17.1,MIR887,MARCH11,LOC401176,LINC02150,ZNF622,RETREG1,LOC101929524,MYO10,BASP1-AS1,BASP1,LINC02111,LINC02217,LINC02218,H3.Y,LINC02223	26	chr5:13687293-18547640	27	118	0.228814	TCGA-02-0079-01,TCGA-02-0266-01,TCGA-05-5715-01,TCGA-06-0402-01,TCGA-09-1661-01,TCGA-09-1666-01,TCGA-09-2043-01,TCGA-10-0930-01,TCGA-12-3652-01,TCGA-13-0797-01,TCGA-13-0807-01,TCGA-13-0888-01,TCGA-13-1409-01,TCGA-13-1506-01,TCGA-13-1509-01,TCGA-13-1511-01,TCGA-13-2059-01,TCGA-13-2065-01,TCGA-18-3417-01,TCGA-19-1388-01,TCGA-20-0987-01,TCGA-20-1684-01,TCGA-21-1080-01,TCGA-22-4601-01,TCGA-22-5479-01…	FALSE
PANCAN	10q	amp	tel	n	RRP12,PGAM1,EXOSC1,ZDHHC16,MMS19,UBTD1,ANKRD2,HOGA1,C10orf62,MORN4,PI4K2A,AVPI1,MARVELD1,ZFYVE27,SFRP5,LINC00866,GOLGA7B,CRTAC1,R3HCC1L,LOXL4,PYROXD2,MIR1287,HPS1,MIR4685,LOC101927278,HPSE2,MIR6507	27	chr10:99147935-101004945	61	272	0.224265	TCGA-04-1331-01,TCGA-04-1342-01,TCGA-04-1353-01,TCGA-04-1367-01,TCGA-04-1654-01,TCGA-09-1666-01,TCGA-09-1673-01,TCGA-09-1675-01,TCGA-09-2051-01,TCGA-10-0931-01,TCGA-10-0935-01,TCGA-12-1099-01,TCGA-13-0714-01,TCGA-13-0720-01,TCGA-13-0761-01,TCGA-13-0791-01,TCGA-13-0791-02,TCGA-13-0900-01,TCGA-13-0901-01,TCGA-13-0903-01,TCGA-13-0905-01,TCGA-13-0910-01,TCGA-13-0913-01,TCGA-13-0913-02,TCGA-13-0920-01…	FALSE
PANCAN	13	del	tel	p-ln	LIG4,ABHD13,TNFSF13B,MYO16,MYO16-AS1	5	chr13:108572831-109924657	17	76	0.223684	TCGA-02-0024-01,TCGA-02-0104-01,TCGA-02-0321-01,TCGA-06-0146-01,TCGA-06-0210-01,TCGA-06-0210-02,TCGA-06-1087-01,TCGA-06-2558-01,TCGA-09-0364-01,TCGA-09-0369-01,TCGA-09-1673-01,TCGA-10-0928-01,TCGA-12-0769-01,TCGA-12-1099-01,TCGA-13-0766-01,TCGA-13-0802-01,TCGA-13-0901-01,TCGA-13-0913-01,TCGA-13-1408-01,TCGA-13-1491-01,TCGA-13-1504-01,TCGA-13-2057-01,TCGA-13-2061-01,TCGA-16-0849-01,TCGA-18-3406-01…	TRUE	hsa-mir-1267, COL4A1, COL4A2, ING1, LIG4, IRS2, TNFSF13B, MYO16, ANKRD10, RAB20, CARKD, CARS2, ABHD13, LINC00346, FAM155A	chr13:107850992-111649698
PANCAN	9q	del	tel	n-ln	PPP6C,LOC105376271,RABEPK,HSPA5,GAPVD1,MAPKAP1,LOC51145,PBX3,LOC101929116,MVB12B,NRON,LMX1B,ZBTB43,ZBTB34,RALGPS1,ANGPTL2,GARNL3,SLC2A8,ZNF79,RPL12,SNORA65,LRSAM1,FAM129B,STXBP1,MIR3911,CFAP157,PTRH1,TTC16,TOR2A,SH2D3C,MIR3960,MIR2861,CDK9,FPGS,ENG,LOC102723566	36	chr9:127945970-130581722	37	167	0.221557	TCGA-02-0039-01,TCGA-04-1331-01,TCGA-04-1337-01,TCGA-04-1346-01,TCGA-04-1536-01,TCGA-04-1649-01,TCGA-06-0129-01,TCGA-06-2565-01,TCGA-06-5415-01,TCGA-09-1669-01,TCGA-12-0818-01,TCGA-12-0827-01,TCGA-12-3648-01,TCGA-13-0720-01,TCGA-13-0760-01,TCGA-13-0791-01,TCGA-13-0791-02,TCGA-13-0803-01,TCGA-13-0889-01,TCGA-13-0893-01,TCGA-13-0901-01,TCGA-13-0903-01,TCGA-13-0911-01,TCGA-13-1495-01,TCGA-13-1496-01…	FALSE
PANCAN	19p	del	tel	n-rn	AKAP8,AKAP8L,WIZ,MIR1470,RASAL3,PGLYRP2,CYP4F22	7	chr19:15467509-15629669	19	89	0.213483	TCGA-02-0080-01,TCGA-04-1346-01,TCGA-04-1348-01,TCGA-04-1349-01,TCGA-04-1350-01,TCGA-04-1360-01,TCGA-04-1364-01,TCGA-04-1365-01,TCGA-04-1519-01,TCGA-04-1525-01,TCGA-04-1542-01,TCGA-04-1646-01,TCGA-04-1655-01,TCGA-05-4382-01,TCGA-09-0366-01,TCGA-09-1659-01,TCGA-09-1667-01,TCGA-09-1669-01,TCGA-09-1673-01,TCGA-09-2044-01,TCGA-09-2053-01,TCGA-09-2054-01,TCGA-10-0927-01,TCGA-10-0933-01,TCGA-10-0936-01…	FALSE
PANCAN	8p	amp	tel	n-ln	CSMD1	1	chr8:3796293-4285608	21	99	0.212121	TCGA-02-0025-01,TCGA-02-0034-01,TCGA-02-0086-01,TCGA-02-0289-01,TCGA-02-2466-01,TCGA-04-1343-01,TCGA-06-0169-01,TCGA-06-0210-02,TCGA-06-0649-01,TCGA-06-0939-01,TCGA-08-0380-01,TCGA-08-0514-01,TCGA-09-2051-01,TCGA-09-2055-01,TCGA-10-0928-01,TCGA-10-0934-01,TCGA-12-3651-01,TCGA-13-0913-01,TCGA-13-1481-01,TCGA-13-2061-01,TCGA-14-0736-01,TCGA-18-3407-01,TCGA-18-3410-01,TCGA-18-3412-01,TCGA-18-3417-01…	TRUE	CSMD1	chr8:2079140-6263357
[truncated: 39 more rows]
