# Supplementary material for: Selective and mechanistic pressures shaping cancer aneuploidies
Source: Research Square preprint supplement (doi:10.21203/rs.3.rs-550953/v1), 2021-05-26
Supplement: Supplementary file 6 [file 421f27fbb408aa5f62e416f8.xlsx]

## Sheet: Table S2a
Table S2a
Abbreviation and description of cohorts included in BrISCUT analyses, as well as the number of samples within each cohort.
Cohort Symbol	Description	Number of Samples
ACC	Adrenocortical Carcinoma	89
BLCA	Bladder Urothelial Carcinoma	407
BRCA	Breast Invasive Carcinoma	1075
BRCABAS	Breast Invasive Carcinoma - basal-like subtype	93
BRCALUM	Breast Invasive Carcinoma - luminal subtype	353
CESC	Cervical Carcinoma	296
CHOL	Cholangiocarcinoma	36
COAD	Colon Adenocarcinoma	430
COADREAD	Colorectal Adenocarcinoma (COAD + READ)	585
DIPLOID	Near-Diploid (Non-Whole Genome Doubled)	6784
DLBC	Lymphoid Neoplasm Diffuse Large B-cell Lymphoma	48
ESCA	Esophageal Carcinoma	183
ESCASTAD	Esophageal and Stomach Carcinoma (ESCA + STAD)	621
ESCASTADCIN	Esophageal and Stomach Carcinoma - Chromosomal Instability subtype	373
ESCASTADGS	Esophageal and Stomach Carcinoma - Genomically stable subtype	79
GBM	Glioblastoma multiforme	588
GBMLGG	Glioblastoma multiforme and Brain Lower Grade Glioma (GBM + LGG)	1113
HNSC	Head and Neck Squamous Cell Carcinoma	519
KICH	Kidney Chromophobe	65
KIPAN	Pan-kidney (KICH + KIRC + KIRP)	855
KIRC	Kidney Renal Clear Cell Carcinoma	507
KIRP	Kidney Renal Papillary Cell Carcinoma	283
LAML	Acute Myeloid Leukemia	191
LGG	Brain Lower Grade Glioma	525
LIHC	Liver Hepatocellular Carcinoma	369
LUAD	Lung Adenocarcinoma	502
LUSC	Lung Squamous Cell Carcinoma	487
MESO	Mesothelioma	87
OV	Ovarian Serous Cystadenocarcinoma	589
PAAD	Pancreatic Adenocarcinoma	184
PANCAN	Pan-cancer (all independent cohorts)	10872
PANSCC	Pan-squamous (from Campbell et al. Cell Reports 2018)	1386
PCPG	Pheochromocytoma and Paraganglioma	165
PRAD	Prostate Adenocarcinoma	490
READ	Rectum Adenocarcinoma	155
SARC	Sarcoma	256
SKCM	Skin Cutaneous Melanoma	470
STAD	Stomach Adenocarcinoma	438
TGCT	Testicular Germ Cell Tumors	155
THCA	Thyroid Carcinoma	504
THYM	Thymoma	123
UCEC	Uterine Corpus Endometrial Carcinoma	520
UCS	Uterine Carcinosarcoma	56
UVM	Uveal Melanoma	80
WGD	Whole Genome Doubled	3713

## Sheet: Table S2b
Table S2b
List of analyzed tumors and their corresponding cohorts. 1 denotes inclusion in a given cohort.
Tumor	GBMLGG	KICH	READ	CESC	PAAD	ESCA	ESCASTADGS	ESCASTAD	THYM	PCPG	ESCASTADCIN	BRCA	UCS	KIPAN	THCA	HNSC	ACC	BRCALUM	BRCABAS	TGCT	LUSC	KIRC	BLCA	PANSCC	PANCAN	SARC	UVM	CHOL	LUAD	DLBC	UCEC	MESO	COADREAD	OV	GBM	SKCM	STAD	PRAD	KIRP	LIHC	LAML	LGG	COAD	WGD	DIPLOID
TCGA-02-0003-01	1	0	0	0	0	0	0	0	0	0	0	0	0	0	0	0	0	0	0	0	0	0	0	0	1	0	0	0	0	0	0	0	0	0	1	0	0	0	0	0	0	0	0	0	1
TCGA-02-0006-01	1	0	0	0	0	0	0	0	0	0	0	0	0	0	0	0	0	0	0	0	0	0	0	0	1	0	0	0	0	0	0	0	0	0	1	0	0	0	0	0	0	0	0	0	1
TCGA-02-0007-01	1	0	0	0	0	0	0	0	0	0	0	0	0	0	0	0	0	0	0	0	0	0	0	0	1	0	0	0	0	0	0	0	0	0	1	0	0	0	0	0	0	0	0	0	1
TCGA-02-0009-01	1	0	0	0	0	0	0	0	0	0	0	0	0	0	0	0	0	0	0	0	0	0	0	0	1	0	0	0	0	0	0	0	0	0	1	0	0	0	0	0	0	0	0	0	1
TCGA-02-0010-01	1	0	0	0	0	0	0	0	0	0	0	0	0	0	0	0	0	0	0	0	0	0	0	0	1	0	0	0	0	0	0	0	0	0	1	0	0	0	0	0	0	0	0	0	1
TCGA-02-0011-01	1	0	0	0	0	0	0	0	0	0	0	0	0	0	0	0	0	0	0	0	0	0	0	0	1	0	0	0	0	0	0	0	0	0	1	0	0	0	0	0	0	0	0	0	1
TCGA-02-0014-01	1	0	0	0	0	0	0	0	0	0	0	0	0	0	0	0	0	0	0	0	0	0	0	0	1	0	0	0	0	0	0	0	0	0	1	0	0	0	0	0	0	0	0	0	1
TCGA-02-0015-01	1	0	0	0	0	0	0	0	0	0	0	0	0	0	0	0	0	0	0	0	0	0	0	0	1	0	0	0	0	0	0	0	0	0	1	0	0	0	0	0	0	0	0	0	1
TCGA-02-0016-01	1	0	0	0	0	0	0	0	0	0	0	0	0	0	0	0	0	0	0	0	0	0	0	0	1	0	0	0	0	0	0	0	0	0	1	0	0	0	0	0	0	0	0	0	1
TCGA-02-0021-01	1	0	0	0	0	0	0	0	0	0	0	0	0	0	0	0	0	0	0	0	0	0	0	0	1	0	0	0	0	0	0	0	0	0	1	0	0	0	0	0	0	0	0	0	1
TCGA-02-0023-01	1	0	0	0	0	0	0	0	0	0	0	0	0	0	0	0	0	0	0	0	0	0	0	0	1	0	0	0	0	0	0	0	0	0	1	0	0	0	0	0	0	0	0	0	1
TCGA-02-0026-01	1	0	0	0	0	0	0	0	0	0	0	0	0	0	0	0	0	0	0	0	0	0	0	0	1	0	0	0	0	0	0	0	0	0	1	0	0	0	0	0	0	0	0	0	1
TCGA-02-0027-01	1	0	0	0	0	0	0	0	0	0	0	0	0	0	0	0	0	0	0	0	0	0	0	0	1	0	0	0	0	0	0	0	0	0	1	0	0	0	0	0	0	0	0	0	1
TCGA-02-0028-01	1	0	0	0	0	0	0	0	0	0	0	0	0	0	0	0	0	0	0	0	0	0	0	0	1	0	0	0	0	0	0	0	0	0	1	0	0	0	0	0	0	0	0	0	1
TCGA-02-0033-01	1	0	0	0	0	0	0	0	0	0	0	0	0	0	0	0	0	0	0	0	0	0	0	0	1	0	0	0	0	0	0	0	0	0	1	0	0	0	0	0	0	0	0	0	1
TCGA-02-0034-01	1	0	0	0	0	0	0	0	0	0	0	0	0	0	0	0	0	0	0	0	0	0	0	0	1	0	0	0	0	0	0	0	0	0	1	0	0	0	0	0	0	0	0	0	1
TCGA-02-0037-01	1	0	0	0	0	0	0	0	0	0	0	0	0	0	0	0	0	0	0	0	0	0	0	0	1	0	0	0	0	0	0	0	0	0	1	0	0	0	0	0	0	0	0	0	1
TCGA-02-0038-01	1	0	0	0	0	0	0	0	0	0	0	0	0	0	0	0	0	0	0	0	0	0	0	0	1	0	0	0	0	0	0	0	0	0	1	0	0	0	0	0	0	0	0	0	1
TCGA-02-0039-01	1	0	0	0	0	0	0	0	0	0	0	0	0	0	0	0	0	0	0	0	0	0	0	0	1	0	0	0	0	0	0	0	0	0	1	0	0	0	0	0	0	0	0	0	1
TCGA-02-0043-01	1	0	0	0	0	0	0	0	0	0	0	0	0	0	0	0	0	0	0	0	0	0	0	0	1	0	0	0	0	0	0	0	0	0	1	0	0	0	0	0	0	0	0	0	1
TCGA-02-0046-01	1	0	0	0	0	0	0	0	0	0	0	0	0	0	0	0	0	0	0	0	0	0	0	0	1	0	0	0	0	0	0	0	0	0	1	0	0	0	0	0	0	0	0	0	1
TCGA-02-0047-01	1	0	0	0	0	0	0	0	0	0	0	0	0	0	0	0	0	0	0	0	0	0	0	0	1	0	0	0	0	0	0	0	0	0	1	0	0	0	0	0	0	0	0	0	1
TCGA-02-0048-01	1	0	0	0	0	0	0	0	0	0	0	0	0	0	0	0	0	0	0	0	0	0	0	0	1	0	0	0	0	0	0	0	0	0	1	0	0	0	0	0	0	0	0	0	1
TCGA-02-0054-01	1	0	0	0	0	0	0	0	0	0	0	0	0	0	0	0	0	0	0	0	0	0	0	0	1	0	0	0	0	0	0	0	0	0	1	0	0	0	0	0	0	0	0	0	1
TCGA-02-0057-01	1	0	0	0	0	0	0	0	0	0	0	0	0	0	0	0	0	0	0	0	0	0	0	0	1	0	0	0	0	0	0	0	0	0	1	0	0	0	0	0	0	0	0	0	1
TCGA-02-0058-01	1	0	0	0	0	0	0	0	0	0	0	0	0	0	0	0	0	0	0	0	0	0	0	0	1	0	0	0	0	0	0	0	0	0	1	0	0	0	0	0	0	0	0	0	1
TCGA-02-0059-01	1	0	0	0	0	0	0	0	0	0	0	0	0	0	0	0	0	0	0	0	0	0	0	0	1	0	0	0	0	0	0	0	0	0	1	0	0	0	0	0	0	0	0	0	1
TCGA-02-0060-01	1	0	0	0	0	0	0	0	0	0	0	0	0	0	0	0	0	0	0	0	0	0	0	0	1	0	0	0	0	0	0	0	0	0	1	0	0	0	0	0	0	0	0	0	1
TCGA-02-0064-01	1	0	0	0	0	0	0	0	0	0	0	0	0	0	0	0	0	0	0	0	0	0	0	0	1	0	0	0	0	0	0	0	0	0	1	0	0	0	0	0	0	0	0	0	1
TCGA-02-0068-01	1	0	0	0	0	0	0	0	0	0	0	0	0	0	0	0	0	0	0	0	0	0	0	0	1	0	0	0	0	0	0	0	0	0	1	0	0	0	0	0	0	0	0	0	1
TCGA-02-0070-01	1	0	0	0	0	0	0	0	0	0	0	0	0	0	0	0	0	0	0	0	0	0	0	0	1	0	0	0	0	0	0	0	0	0	1	0	0	0	0	0	0	0	0	0	1
TCGA-02-0071-01	1	0	0	0	0	0	0	0	0	0	0	0	0	0	0	0	0	0	0	0	0	0	0	0	1	0	0	0	0	0	0	0	0	0	1	0	0	0	0	0	0	0	0	0	1
TCGA-02-0074-01	1	0	0	0	0	0	0	0	0	0	0	0	0	0	0	0	0	0	0	0	0	0	0	0	1	0	0	0	0	0	0	0	0	0	1	0	0	0	0	0	0	0	0	0	1
TCGA-02-0075-01	1	0	0	0	0	0	0	0	0	0	0	0	0	0	0	0	0	0	0	0	0	0	0	0	1	0	0	0	0	0	0	0	0	0	1	0	0	0	0	0	0	0	0	0	1
TCGA-02-0079-01	1	0	0	0	0	0	0	0	0	0	0	0	0	0	0	0	0	0	0	0	0	0	0	0	1	0	0	0	0	0	0	0	0	0	1	0	0	0	0	0	0	0	0	0	1
TCGA-02-0083-01	1	0	0	0	0	0	0	0	0	0	0	0	0	0	0	0	0	0	0	0	0	0	0	0	1	0	0	0	0	0	0	0	0	0	1	0	0	0	0	0	0	0	0	0	1
TCGA-02-0084-01	1	0	0	0	0	0	0	0	0	0	0	0	0	0	0	0	0	0	0	0	0	0	0	0	1	0	0	0	0	0	0	0	0	0	1	0	0	0	0	0	0	0	0	0	1
TCGA-02-0085-01	1	0	0	0	0	0	0	0	0	0	0	0	0	0	0	0	0	0	0	0	0	0	0	0	1	0	0	0	0	0	0	0	0	0	1	0	0	0	0	0	0	0	0	0	1
TCGA-02-0087-01	1	0	0	0	0	0	0	0	0	0	0	0	0	0	0	0	0	0	0	0	0	0	0	0	1	0	0	0	0	0	0	0	0	0	1	0	0	0	0	0	0	0	0	0	1
TCGA-02-0089-01	1	0	0	0	0	0	0	0	0	0	0	0	0	0	0	0	0	0	0	0	0	0	0	0	1	0	0	0	0	0	0	0	0	0	1	0	0	0	0	0	0	0	0	0	1
TCGA-02-0099-01	1	0	0	0	0	0	0	0	0	0	0	0	0	0	0	0	0	0	0	0	0	0	0	0	1	0	0	0	0	0	0	0	0	0	1	0	0	0	0	0	0	0	0	0	1
TCGA-02-0102-01	1	0	0	0	0	0	0	0	0	0	0	0	0	0	0	0	0	0	0	0	0	0	0	0	1	0	0	0	0	0	0	0	0	0	1	0	0	0	0	0	0	0	0	0	1
TCGA-02-0104-01	1	0	0	0	0	0	0	0	0	0	0	0	0	0	0	0	0	0	0	0	0	0	0	0	1	0	0	0	0	0	0	0	0	0	1	0	0	0	0	0	0	0	0	0	1
TCGA-02-0107-01	1	0	0	0	0	0	0	0	0	0	0	0	0	0	0	0	0	0	0	0	0	0	0	0	1	0	0	0	0	0	0	0	0	0	1	0	0	0	0	0	0	0	0	0	1
TCGA-02-0111-01	1	0	0	0	0	0	0	0	0	0	0	0	0	0	0	0	0	0	0	0	0	0	0	0	1	0	0	0	0	0	0	0	0	0	1	0	0	0	0	0	0	0	0	0	1
TCGA-02-0113-01	1	0	0	0	0	0	0	0	0	0	0	0	0	0	0	0	0	0	0	0	0	0	0	0	1	0	0	0	0	0	0	0	0	0	1	0	0	0	0	0	0	0	0	0	1
TCGA-02-0114-01	1	0	0	0	0	0	0	0	0	0	0	0	0	0	0	0	0	0	0	0	0	0	0	0	1	0	0	0	0	0	0	0	0	0	1	0	0	0	0	0	0	0	0	0	1
TCGA-02-0115-01	1	0	0	0	0	0	0	0	0	0	0	0	0	0	0	0	0	0	0	0	0	0	0	0	1	0	0	0	0	0	0	0	0	0	1	0	0	0	0	0	0	0	0	0	1
TCGA-02-0116-01	1	0	0	0	0	0	0	0	0	0	0	0	0	0	0	0	0	0	0	0	0	0	0	0	1	0	0	0	0	0	0	0	0	0	1	0	0	0	0	0	0	0	0	0	1
TCGA-02-0258-01	1	0	0	0	0	0	0	0	0	0	0	0	0	0	0	0	0	0	0	0	0	0	0	0	1	0	0	0	0	0	0	0	0	0	1	0	0	0	0	0	0	0	0	0	1
TCGA-02-0260-01	1	0	0	0	0	0	0	0	0	0	0	0	0	0	0	0	0	0	0	0	0	0	0	0	1	0	0	0	0	0	0	0	0	0	1	0	0	0	0	0	0	0	0	0	1
TCGA-02-0269-01	1	0	0	0	0	0	0	0	0	0	0	0	0	0	0	0	0	0	0	0	0	0	0	0	1	0	0	0	0	0	0	0	0	0	1	0	0	0	0	0	0	0	0	0	1
TCGA-02-0285-01	1	0	0	0	0	0	0	0	0	0	0	0	0	0	0	0	0	0	0	0	0	0	0	0	1	0	0	0	0	0	0	0	0	0	1	0	0	0	0	0	0	0	0	0	1
TCGA-02-0290-01	1	0	0	0	0	0	0	0	0	0	0	0	0	0	0	0	0	0	0	0	0	0	0	0	1	0	0	0	0	0	0	0	0	0	1	0	0	0	0	0	0	0	0	0	1
TCGA-02-0317-01	1	0	0	0	0	0	0	0	0	0	0	0	0	0	0	0	0	0	0	0	0	0	0	0	1	0	0	0	0	0	0	0	0	0	1	0	0	0	0	0	0	0	0	0	1
TCGA-02-0321-01	1	0	0	0	0	0	0	0	0	0	0	0	0	0	0	0	0	0	0	0	0	0	0	0	1	0	0	0	0	0	0	0	0	0	1	0	0	0	0	0	0	0	0	0	1
TCGA-02-0324-01	1	0	0	0	0	0	0	0	0	0	0	0	0	0	0	0	0	0	0	0	0	0	0	0	1	0	0	0	0	0	0	0	0	0	1	0	0	0	0	0	0	0	0	0	1
TCGA-02-0325-01	1	0	0	0	0	0	0	0	0	0	0	0	0	0	0	0	0	0	0	0	0	0	0	0	1	0	0	0	0	0	0	0	0	0	1	0	0	0	0	0	0	0	0	0	1
TCGA-02-0326-01	1	0	0	0	0	0	0	0	0	0	0	0	0	0	0	0	0	0	0	0	0	0	0	0	1	0	0	0	0	0	0	0	0	0	1	0	0	0	0	0	0	0	0	0	1
TCGA-02-0330-01	1	0	0	0	0	0	0	0	0	0	0	0	0	0	0	0	0	0	0	0	0	0	0	0	1	0	0	0	0	0	0	0	0	0	1	0	0	0	0	0	0	0	0	0	1
TCGA-02-0333-01	1	0	0	0	0	0	0	0	0	0	0	0	0	0	0	0	0	0	0	0	0	0	0	0	1	0	0	0	0	0	0	0	0	0	1	0	0	0	0	0	0	0	0	0	1
TCGA-02-0337-01	1	0	0	0	0	0	0	0	0	0	0	0	0	0	0	0	0	0	0	0	0	0	0	0	1	0	0	0	0	0	0	0	0	0	1	0	0	0	0	0	0	0	0	0	1
TCGA-02-0338-01	1	0	0	0	0	0	0	0	0	0	0	0	0	0	0	0	0	0	0	0	0	0	0	0	1	0	0	0	0	0	0	0	0	0	1	0	0	0	0	0	0	0	0	0	1
TCGA-02-0339-01	1	0	0	0	0	0	0	0	0	0	0	0	0	0	0	0	0	0	0	0	0	0	0	0	1	0	0	0	0	0	0	0	0	0	1	0	0	0	0	0	0	0	0	0	1
TCGA-02-0422-01	1	0	0	0	0	0	0	0	0	0	0	0	0	0	0	0	0	0	0	0	0	0	0	0	1	0	0	0	0	0	0	0	0	0	1	0	0	0	0	0	0	0	0	0	1
TCGA-02-0430-01	1	0	0	0	0	0	0	0	0	0	0	0	0	0	0	0	0	0	0	0	0	0	0	0	1	0	0	0	0	0	0	0	0	0	1	0	0	0	0	0	0	0	0	0	1
TCGA-02-0440-01	1	0	0	0	0	0	0	0	0	0	0	0	0	0	0	0	0	0	0	0	0	0	0	0	1	0	0	0	0	0	0	0	0	0	1	0	0	0	0	0	0	0	0	0	1
TCGA-02-0446-01	1	0	0	0	0	0	0	0	0	0	0	0	0	0	0	0	0	0	0	0	0	0	0	0	1	0	0	0	0	0	0	0	0	0	1	0	0	0	0	0	0	0	0	0	1
TCGA-02-0451-01	1	0	0	0	0	0	0	0	0	0	0	0	0	0	0	0	0	0	0	0	0	0	0	0	1	0	0	0	0	0	0	0	0	0	1	0	0	0	0	0	0	0	0	0	1
TCGA-02-0456-01	1	0	0	0	0	0	0	0	0	0	0	0	0	0	0	0	0	0	0	0	0	0	0	0	1	0	0	0	0	0	0	0	0	0	1	0	0	0	0	0	0	0	0	0	1
TCGA-02-2466-01	1	0	0	0	0	0	0	0	0	0	0	0	0	0	0	0	0	0	0	0	0	0	0	0	1	0	0	0	0	0	0	0	0	0	1	0	0	0	0	0	0	0	0	0	1
TCGA-02-2470-01	1	0	0	0	0	0	0	0	0	0	0	0	0	0	0	0	0	0	0	0	0	0	0	0	1	0	0	0	0	0	0	0	0	0	1	0	0	0	0	0	0	0	0	0	1
TCGA-02-2483-01	1	0	0	0	0	0	0	0	0	0	0	0	0	0	0	0	0	0	0	0	0	0	0	0	1	0	0	0	0	0	0	0	0	0	1	0	0	0	0	0	0	0	0	0	1
TCGA-02-2486-01	1	0	0	0	0	0	0	0	0	0	0	0	0	0	0	0	0	0	0	0	0	0	0	0	1	0	0	0	0	0	0	0	0	0	1	0	0	0	0	0	0	0	0	0	1
TCGA-04-1331-01	0	0	0	0	0	0	0	0	0	0	0	0	0	0	0	0	0	0	0	0	0	0	0	0	1	0	0	0	0	0	0	0	0	1	0	0	0	0	0	0	0	0	0	0	1
TCGA-04-1335-01	0	0	0	0	0	0	0	0	0	0	0	0	0	0	0	0	0	0	0	0	0	0	0	0	1	0	0	0	0	0	0	0	0	1	0	0	0	0	0	0	0	0	0	0	1
TCGA-04-1336-01	0	0	0	0	0	0	0	0	0	0	0	0	0	0	0	0	0	0	0	0	0	0	0	0	1	0	0	0	0	0	0	0	0	1	0	0	0	0	0	0	0	0	0	0	1
TCGA-04-1342-01	0	0	0	0	0	0	0	0	0	0	0	0	0	0	0	0	0	0	0	0	0	0	0	0	1	0	0	0	0	0	0	0	0	1	0	0	0	0	0	0	0	0	0	0	1
TCGA-04-1348-01	0	0	0	0	0	0	0	0	0	0	0	0	0	0	0	0	0	0	0	0	0	0	0	0	1	0	0	0	0	0	0	0	0	1	0	0	0	0	0	0	0	0	0	0	1
TCGA-04-1353-01	0	0	0	0	0	0	0	0	0	0	0	0	0	0	0	0	0	0	0	0	0	0	0	0	1	0	0	0	0	0	0	0	0	1	0	0	0	0	0	0	0	0	0	0	1
TCGA-04-1361-01	0	0	0	0	0	0	0	0	0	0	0	0	0	0	0	0	0	0	0	0	0	0	0	0	1	0	0	0	0	0	0	0	0	1	0	0	0	0	0	0	0	0	0	0	1
TCGA-04-1365-01	0	0	0	0	0	0	0	0	0	0	0	0	0	0	0	0	0	0	0	0	0	0	0	0	1	0	0	0	0	0	0	0	0	1	0	0	0	0	0	0	0	0	0	0	1
TCGA-04-1367-01	0	0	0	0	0	0	0	0	0	0	0	0	0	0	0	0	0	0	0	0	0	0	0	0	1	0	0	0	0	0	0	0	0	1	0	0	0	0	0	0	0	0	0	0	1
TCGA-04-1519-01	0	0	0	0	0	0	0	0	0	0	0	0	0	0	0	0	0	0	0	0	0	0	0	0	1	0	0	0	0	0	0	0	0	1	0	0	0	0	0	0	0	0	0	0	1
TCGA-04-1644-01	0	0	0	0	0	0	0	0	0	0	0	0	0	0	0	0	0	0	0	0	0	0	0	0	1	0	0	0	0	0	0	0	0	1	0	0	0	0	0	0	0	0	0	0	1
TCGA-04-1646-01	0	0	0	0	0	0	0	0	0	0	0	0	0	0	0	0	0	0	0	0	0	0	0	0	1	0	0	0	0	0	0	0	0	1	0	0	0	0	0	0	0	0	0	0	1
TCGA-04-1648-01	0	0	0	0	0	0	0	0	0	0	0	0	0	0	0	0	0	0	0	0	0	0	0	0	1	0	0	0	0	0	0	0	0	1	0	0	0	0	0	0	0	0	0	0	1
TCGA-04-1651-01	0	0	0	0	0	0	0	0	0	0	0	0	0	0	0	0	0	0	0	0	0	0	0	0	1	0	0	0	0	0	0	0	0	1	0	0	0	0	0	0	0	0	0	0	1
TCGA-04-1654-01	0	0	0	0	0	0	0	0	0	0	0	0	0	0	0	0	0	0	0	0	0	0	0	0	1	0	0	0	0	0	0	0	0	1	0	0	0	0	0	0	0	0	0	0	1
TCGA-05-4384-01	0	0	0	0	0	0	0	0	0	0	0	0	0	0	0	0	0	0	0	0	0	0	0	0	1	0	0	0	1	0	0	0	0	0	0	0	0	0	0	0	0	0	0	0	1
TCGA-05-4396-01	0	0	0	0	0	0	0	0	0	0	0	0	0	0	0	0	0	0	0	0	0	0	0	0	1	0	0	0	1	0	0	0	0	0	0	0	0	0	0	0	0	0	0	0	1
TCGA-05-4397-01	0	0	0	0	0	0	0	0	0	0	0	0	0	0	0	0	0	0	0	0	0	0	0	0	1	0	0	0	1	0	0	0	0	0	0	0	0	0	0	0	0	0	0	0	1
TCGA-05-4403-01	0	0	0	0	0	0	0	0	0	0	0	0	0	0	0	0	0	0	0	0	0	0	0	0	1	0	0	0	1	0	0	0	0	0	0	0	0	0	0	0	0	0	0	0	1
TCGA-05-4418-01	0	0	0	0	0	0	0	0	0	0	0	0	0	0	0	0	0	0	0	0	0	0	0	0	1	0	0	0	1	0	0	0	0	0	0	0	0	0	0	0	0	0	0	0	1
TCGA-05-4422-01	0	0	0	0	0	0	0	0	0	0	0	0	0	0	0	0	0	0	0	0	0	0	0	0	1	0	0	0	1	0	0	0	0	0	0	0	0	0	0	0	0	0	0	0	1
TCGA-05-4425-01	0	0	0	0	0	0	0	0	0	0	0	0	0	0	0	0	0	0	0	0	0	0	0	0	1	0	0	0	1	0	0	0	0	0	0	0	0	0	0	0	0	0	0	0	1
TCGA-05-4426-01	0	0	0	0	0	0	0	0	0	0	0	0	0	0	0	0	0	0	0	0	0	0	0	0	1	0	0	0	1	0	0	0	0	0	0	0	0	0	0	0	0	0	0	0	1
TCGA-05-4433-01	0	0	0	0	0	0	0	0	0	0	0	0	0	0	0	0	0	0	0	0	0	0	0	0	1	0	0	0	1	0	0	0	0	0	0	0	0	0	0	0	0	0	0	0	1
TCGA-05-4434-01	0	0	0	0	0	0	0	0	0	0	0	0	0	0	0	0	0	0	0	0	0	0	0	0	1	0	0	0	1	0	0	0	0	0	0	0	0	0	0	0	0	0	0	0	1
TCGA-05-5425-01	0	0	0	0	0	0	0	0	0	0	0	0	0	0	0	0	0	0	0	0	0	0	0	0	1	0	0	0	1	0	0	0	0	0	0	0	0	0	0	0	0	0	0	0	1
TCGA-05-5429-01	0	0	0	0	0	0	0	0	0	0	0	0	0	0	0	0	0	0	0	0	0	0	0	0	1	0	0	0	1	0	0	0	0	0	0	0	0	0	0	0	0	0	0	0	1
TCGA-05-5715-01	0	0	0	0	0	0	0	0	0	0	0	0	0	0	0	0	0	0	0	0	0	0	0	0	1	0	0	0	1	0	0	0	0	0	0	0	0	0	0	0	0	0	0	0	1
TCGA-06-0119-01	1	0	0	0	0	0	0	0	0	0	0	0	0	0	0	0	0	0	0	0	0	0	0	0	1	0	0	0	0	0	0	0	0	0	1	0	0	0	0	0	0	0	0	0	1
TCGA-06-0122-01	1	0	0	0	0	0	0	0	0	0	0	0	0	0	0	0	0	0	0	0	0	0	0	0	1	0	0	0	0	0	0	0	0	0	1	0	0	0	0	0	0	0	0	0	1
TCGA-06-0124-01	1	0	0	0	0	0	0	0	0	0	0	0	0	0	0	0	0	0	0	0	0	0	0	0	1	0	0	0	0	0	0	0	0	0	1	0	0	0	0	0	0	0	0	0	1
TCGA-06-0125-01	1	0	0	0	0	0	0	0	0	0	0	0	0	0	0	0	0	0	0	0	0	0	0	0	1	0	0	0	0	0	0	0	0	0	1	0	0	0	0	0	0	0	0	0	1
TCGA-06-0125-02	1	0	0	0	0	0	0	0	0	0	0	0	0	0	0	0	0	0	0	0	0	0	0	0	1	0	0	0	0	0	0	0	0	0	1	0	0	0	0	0	0	0	0	0	1
TCGA-06-0126-01	1	0	0	0	0	0	0	0	0	0	0	0	0	0	0	0	0	0	0	0	0	0	0	0	1	0	0	0	0	0	0	0	0	0	1	0	0	0	0	0	0	0	0	0	1
TCGA-06-0127-01	1	0	0	0	0	0	0	0	0	0	0	0	0	0	0	0	0	0	0	0	0	0	0	0	1	0	0	0	0	0	0	0	0	0	1	0	0	0	0	0	0	0	0	0	1
TCGA-06-0128-01	1	0	0	0	0	0	0	0	0	0	0	0	0	0	0	0	0	0	0	0	0	0	0	0	1	0	0	0	0	0	0	0	0	0	1	0	0	0	0	0	0	0	0	0	1
TCGA-06-0132-01	1	0	0	0	0	0	0	0	0	0	0	0	0	0	0	0	0	0	0	0	0	0	0	0	1	0	0	0	0	0	0	0	0	0	1	0	0	0	0	0	0	0	0	0	1
TCGA-06-0133-01	1	0	0	0	0	0	0	0	0	0	0	0	0	0	0	0	0	0	0	0	0	0	0	0	1	0	0	0	0	0	0	0	0	0	1	0	0	0	0	0	0	0	0	0	1
TCGA-06-0137-01	1	0	0	0	0	0	0	0	0	0	0	0	0	0	0	0	0	0	0	0	0	0	0	0	1	0	0	0	0	0	0	0	0	0	1	0	0	0	0	0	0	0	0	0	1
TCGA-06-0140-01	1	0	0	0	0	0	0	0	0	0	0	0	0	0	0	0	0	0	0	0	0	0	0	0	1	0	0	0	0	0	0	0	0	0	1	0	0	0	0	0	0	0	0	0	1
TCGA-06-0141-01	1	0	0	0	0	0	0	0	0	0	0	0	0	0	0	0	0	0	0	0	0	0	0	0	1	0	0	0	0	0	0	0	0	0	1	0	0	0	0	0	0	0	0	0	1
TCGA-06-0143-01	1	0	0	0	0	0	0	0	0	0	0	0	0	0	0	0	0	0	0	0	0	0	0	0	1	0	0	0	0	0	0	0	0	0	1	0	0	0	0	0	0	0	0	0	1
TCGA-06-0145-01	1	0	0	0	0	0	0	0	0	0	0	0	0	0	0	0	0	0	0	0	0	0	0	0	1	0	0	0	0	0	0	0	0	0	1	0	0	0	0	0	0	0	0	0	1
TCGA-06-0148-01	1	0	0	0	0	0	0	0	0	0	0	0	0	0	0	0	0	0	0	0	0	0	0	0	1	0	0	0	0	0	0	0	0	0	1	0	0	0	0	0	0	0	0	0	1
TCGA-06-0149-01	1	0	0	0	0	0	0	0	0	0	0	0	0	0	0	0	0	0	0	0	0	0	0	0	1	0	0	0	0	0	0	0	0	0	1	0	0	0	0	0	0	0	0	0	1
TCGA-06-0151-01	1	0	0	0	0	0	0	0	0	0	0	0	0	0	0	0	0	0	0	0	0	0	0	0	1	0	0	0	0	0	0	0	0	0	1	0	0	0	0	0	0	0	0	0	1
TCGA-06-0152-02	1	0	0	0	0	0	0	0	0	0	0	0	0	0	0	0	0	0	0	0	0	0	0	0	1	0	0	0	0	0	0	0	0	0	1	0	0	0	0	0	0	0	0	0	1
TCGA-06-0154-01	1	0	0	0	0	0	0	0	0	0	0	0	0	0	0	0	0	0	0	0	0	0	0	0	1	0	0	0	0	0	0	0	0	0	1	0	0	0	0	0	0	0	0	0	1
TCGA-06-0155-01	1	0	0	0	0	0	0	0	0	0	0	0	0	0	0	0	0	0	0	0	0	0	0	0	1	0	0	0	0	0	0	0	0	0	1	0	0	0	0	0	0	0	0	0	1
TCGA-06-0157-01	1	0	0	0	0	0	0	0	0	0	0	0	0	0	0	0	0	0	0	0	0	0	0	0	1	0	0	0	0	0	0	0	0	0	1	0	0	0	0	0	0	0	0	0	1
TCGA-06-0158-01	1	0	0	0	0	0	0	0	0	0	0	0	0	0	0	0	0	0	0	0	0	0	0	0	1	0	0	0	0	0	0	0	0	0	1	0	0	0	0	0	0	0	0	0	1
TCGA-06-0159-01	1	0	0	0	0	0	0	0	0	0	0	0	0	0	0	0	0	0	0	0	0	0	0	0	1	0	0	0	0	0	0	0	0	0	1	0	0	0	0	0	0	0	0	0	1
TCGA-06-0162-01	1	0	0	0	0	0	0	0	0	0	0	0	0	0	0	0	0	0	0	0	0	0	0	0	1	0	0	0	0	0	0	0	0	0	1	0	0	0	0	0	0	0	0	0	1
TCGA-06-0164-01	1	0	0	0	0	0	0	0	0	0	0	0	0	0	0	0	0	0	0	0	0	0	0	0	1	0	0	0	0	0	0	0	0	0	1	0	0	0	0	0	0	0	0	0	1
TCGA-06-0166-01	1	0	0	0	0	0	0	0	0	0	0	0	0	0	0	0	0	0	0	0	0	0	0	0	1	0	0	0	0	0	0	0	0	0	1	0	0	0	0	0	0	0	0	0	1
TCGA-06-0168-01	1	0	0	0	0	0	0	0	0	0	0	0	0	0	0	0	0	0	0	0	0	0	0	0	1	0	0	0	0	0	0	0	0	0	1	0	0	0	0	0	0	0	0	0	1
TCGA-06-0169-01	1	0	0	0	0	0	0	0	0	0	0	0	0	0	0	0	0	0	0	0	0	0	0	0	1	0	0	0	0	0	0	0	0	0	1	0	0	0	0	0	0	0	0	0	1
TCGA-06-0171-01	1	0	0	0	0	0	0	0	0	0	0	0	0	0	0	0	0	0	0	0	0	0	0	0	1	0	0	0	0	0	0	0	0	0	1	0	0	0	0	0	0	0	0	0	1
TCGA-06-0171-02	1	0	0	0	0	0	0	0	0	0	0	0	0	0	0	0	0	0	0	0	0	0	0	0	1	0	0	0	0	0	0	0	0	0	1	0	0	0	0	0	0	0	0	0	1
TCGA-06-0173-01	1	0	0	0	0	0	0	0	0	0	0	0	0	0	0	0	0	0	0	0	0	0	0	0	1	0	0	0	0	0	0	0	0	0	1	0	0	0	0	0	0	0	0	0	1
TCGA-06-0174-01	1	0	0	0	0	0	0	0	0	0	0	0	0	0	0	0	0	0	0	0	0	0	0	0	1	0	0	0	0	0	0	0	0	0	1	0	0	0	0	0	0	0	0	0	1
TCGA-06-0175-01	1	0	0	0	0	0	0	0	0	0	0	0	0	0	0	0	0	0	0	0	0	0	0	0	1	0	0	0	0	0	0	0	0	0	1	0	0	0	0	0	0	0	0	0	1
TCGA-06-0179-01	1	0	0	0	0	0	0	0	0	0	0	0	0	0	0	0	0	0	0	0	0	0	0	0	1	0	0	0	0	0	0	0	0	0	1	0	0	0	0	0	0	0	0	0	1
TCGA-06-0182-01	1	0	0	0	0	0	0	0	0	0	0	0	0	0	0	0	0	0	0	0	0	0	0	0	1	0	0	0	0	0	0	0	0	0	1	0	0	0	0	0	0	0	0	0	1
TCGA-06-0184-01	1	0	0	0	0	0	0	0	0	0	0	0	0	0	0	0	0	0	0	0	0	0	0	0	1	0	0	0	0	0	0	0	0	0	1	0	0	0	0	0	0	0	0	0	1
TCGA-06-0187-01	1	0	0	0	0	0	0	0	0	0	0	0	0	0	0	0	0	0	0	0	0	0	0	0	1	0	0	0	0	0	0	0	0	0	1	0	0	0	0	0	0	0	0	0	1
TCGA-06-0188-01	1	0	0	0	0	0	0	0	0	0	0	0	0	0	0	0	0	0	0	0	0	0	0	0	1	0	0	0	0	0	0	0	0	0	1	0	0	0	0	0	0	0	0	0	1
TCGA-06-0190-01	1	0	0	0	0	0	0	0	0	0	0	0	0	0	0	0	0	0	0	0	0	0	0	0	1	0	0	0	0	0	0	0	0	0	1	0	0	0	0	0	0	0	0	0	1
TCGA-06-0190-02	1	0	0	0	0	0	0	0	0	0	0	0	0	0	0	0	0	0	0	0	0	0	0	0	1	0	0	0	0	0	0	0	0	0	1	0	0	0	0	0	0	0	0	0	1
TCGA-06-0192-01	1	0	0	0	0	0	0	0	0	0	0	0	0	0	0	0	0	0	0	0	0	0	0	0	1	0	0	0	0	0	0	0	0	0	1	0	0	0	0	0	0	0	0	0	1
TCGA-06-0194-01	1	0	0	0	0	0	0	0	0	0	0	0	0	0	0	0	0	0	0	0	0	0	0	0	1	0	0	0	0	0	0	0	0	0	1	0	0	0	0	0	0	0	0	0	1
TCGA-06-0197-01	1	0	0	0	0	0	0	0	0	0	0	0	0	0	0	0	0	0	0	0	0	0	0	0	1	0	0	0	0	0	0	0	0	0	1	0	0	0	0	0	0	0	0	0	1
TCGA-06-0201-01	1	0	0	0	0	0	0	0	0	0	0	0	0	0	0	0	0	0	0	0	0	0	0	0	1	0	0	0	0	0	0	0	0	0	1	0	0	0	0	0	0	0	0	0	1
TCGA-06-0206-01	1	0	0	0	0	0	0	0	0	0	0	0	0	0	0	0	0	0	0	0	0	0	0	0	1	0	0	0	0	0	0	0	0	0	1	0	0	0	0	0	0	0	0	0	1
TCGA-06-0208-01	1	0	0	0	0	0	0	0	0	0	0	0	0	0	0	0	0	0	0	0	0	0	0	0	1	0	0	0	0	0	0	0	0	0	1	0	0	0	0	0	0	0	0	0	1
TCGA-06-0210-01	1	0	0	0	0	0	0	0	0	0	0	0	0	0	0	0	0	0	0	0	0	0	0	0	1	0	0	0	0	0	0	0	0	0	1	0	0	0	0	0	0	0	0	0	1
TCGA-06-0211-01	1	0	0	0	0	0	0	0	0	0	0	0	0	0	0	0	0	0	0	0	0	0	0	0	1	0	0	0	0	0	0	0	0	0	1	0	0	0	0	0	0	0	0	0	1
TCGA-06-0211-02	1	0	0	0	0	0	0	0	0	0	0	0	0	0	0	0	0	0	0	0	0	0	0	0	1	0	0	0	0	0	0	0	0	0	1	0	0	0	0	0	0	0	0	0	1
TCGA-06-0213-01	1	0	0	0	0	0	0	0	0	0	0	0	0	0	0	0	0	0	0	0	0	0	0	0	1	0	0	0	0	0	0	0	0	0	1	0	0	0	0	0	0	0	0	0	1
TCGA-06-0214-01	1	0	0	0	0	0	0	0	0	0	0	0	0	0	0	0	0	0	0	0	0	0	0	0	1	0	0	0	0	0	0	0	0	0	1	0	0	0	0	0	0	0	0	0	1
TCGA-06-0216-01	1	0	0	0	0	0	0	0	0	0	0	0	0	0	0	0	0	0	0	0	0	0	0	0	1	0	0	0	0	0	0	0	0	0	1	0	0	0	0	0	0	0	0	0	1
TCGA-06-0219-01	1	0	0	0	0	0	0	0	0	0	0	0	0	0	0	0	0	0	0	0	0	0	0	0	1	0	0	0	0	0	0	0	0	0	1	0	0	0	0	0	0	0	0	0	1
TCGA-06-0221-01	1	0	0	0	0	0	0	0	0	0	0	0	0	0	0	0	0	0	0	0	0	0	0	0	1	0	0	0	0	0	0	0	0	0	1	0	0	0	0	0	0	0	0	0	1
TCGA-06-0221-02	1	0	0	0	0	0	0	0	0	0	0	0	0	0	0	0	0	0	0	0	0	0	0	0	1	0	0	0	0	0	0	0	0	0	1	0	0	0	0	0	0	0	0	0	1
TCGA-06-0237-01	1	0	0	0	0	0	0	0	0	0	0	0	0	0	0	0	0	0	0	0	0	0	0	0	1	0	0	0	0	0	0	0	0	0	1	0	0	0	0	0	0	0	0	0	1
TCGA-06-0238-01	1	0	0	0	0	0	0	0	0	0	0	0	0	0	0	0	0	0	0	0	0	0	0	0	1	0	0	0	0	0	0	0	0	0	1	0	0	0	0	0	0	0	0	0	1
TCGA-06-0241-01	1	0	0	0	0	0	0	0	0	0	0	0	0	0	0	0	0	0	0	0	0	0	0	0	1	0	0	0	0	0	0	0	0	0	1	0	0	0	0	0	0	0	0	0	1
TCGA-06-0394-01	1	0	0	0	0	0	0	0	0	0	0	0	0	0	0	0	0	0	0	0	0	0	0	0	1	0	0	0	0	0	0	0	0	0	1	0	0	0	0	0	0	0	0	0	1
TCGA-06-0397-01	1	0	0	0	0	0	0	0	0	0	0	0	0	0	0	0	0	0	0	0	0	0	0	0	1	0	0	0	0	0	0	0	0	0	1	0	0	0	0	0	0	0	0	0	1
TCGA-06-0402-01	1	0	0	0	0	0	0	0	0	0	0	0	0	0	0	0	0	0	0	0	0	0	0	0	1	0	0	0	0	0	0	0	0	0	1	0	0	0	0	0	0	0	0	0	1
TCGA-06-0412-01	1	0	0	0	0	0	0	0	0	0	0	0	0	0	0	0	0	0	0	0	0	0	0	0	1	0	0	0	0	0	0	0	0	0	1	0	0	0	0	0	0	0	0	0	1
TCGA-06-0413-01	1	0	0	0	0	0	0	0	0	0	0	0	0	0	0	0	0	0	0	0	0	0	0	0	1	0	0	0	0	0	0	0	0	0	1	0	0	0	0	0	0	0	0	0	1
TCGA-06-0645-01	1	0	0	0	0	0	0	0	0	0	0	0	0	0	0	0	0	0	0	0	0	0	0	0	1	0	0	0	0	0	0	0	0	0	1	0	0	0	0	0	0	0	0	0	1
TCGA-06-0646-01	1	0	0	0	0	0	0	0	0	0	0	0	0	0	0	0	0	0	0	0	0	0	0	0	1	0	0	0	0	0	0	0	0	0	1	0	0	0	0	0	0	0	0	0	1
TCGA-06-0648-01	1	0	0	0	0	0	0	0	0	0	0	0	0	0	0	0	0	0	0	0	0	0	0	0	1	0	0	0	0	0	0	0	0	0	1	0	0	0	0	0	0	0	0	0	1
TCGA-06-0649-01	1	0	0	0	0	0	0	0	0	0	0	0	0	0	0	0	0	0	0	0	0	0	0	0	1	0	0	0	0	0	0	0	0	0	1	0	0	0	0	0	0	0	0	0	1
TCGA-06-0650-01	1	0	0	0	0	0	0	0	0	0	0	0	0	0	0	0	0	0	0	0	0	0	0	0	1	0	0	0	0	0	0	0	0	0	1	0	0	0	0	0	0	0	0	0	1
TCGA-06-0686-01	1	0	0	0	0	0	0	0	0	0	0	0	0	0	0	0	0	0	0	0	0	0	0	0	1	0	0	0	0	0	0	0	0	0	1	0	0	0	0	0	0	0	0	0	1
TCGA-06-0743-01	1	0	0	0	0	0	0	0	0	0	0	0	0	0	0	0	0	0	0	0	0	0	0	0	1	0	0	0	0	0	0	0	0	0	1	0	0	0	0	0	0	0	0	0	1
TCGA-06-0744-01	1	0	0	0	0	0	0	0	0	0	0	0	0	0	0	0	0	0	0	0	0	0	0	0	1	0	0	0	0	0	0	0	0	0	1	0	0	0	0	0	0	0	0	0	1
TCGA-06-0745-01	1	0	0	0	0	0	0	0	0	0	0	0	0	0	0	0	0	0	0	0	0	0	0	0	1	0	0	0	0	0	0	0	0	0	1	0	0	0	0	0	0	0	0	0	1
TCGA-06-0747-01	1	0	0	0	0	0	0	0	0	0	0	0	0	0	0	0	0	0	0	0	0	0	0	0	1	0	0	0	0	0	0	0	0	0	1	0	0	0	0	0	0	0	0	0	1
TCGA-06-0749-01	1	0	0	0	0	0	0	0	0	0	0	0	0	0	0	0	0	0	0	0	0	0	0	0	1	0	0	0	0	0	0	0	0	0	1	0	0	0	0	0	0	0	0	0	1
TCGA-06-0750-01	1	0	0	0	0	0	0	0	0	0	0	0	0	0	0	0	0	0	0	0	0	0	0	0	1	0	0	0	0	0	0	0	0	0	1	0	0	0	0	0	0	0	0	0	1
TCGA-06-0876-01	1	0	0	0	0	0	0	0	0	0	0	0	0	0	0	0	0	0	0	0	0	0	0	0	1	0	0	0	0	0	0	0	0	0	1	0	0	0	0	0	0	0	0	0	1
TCGA-06-0877-01	1	0	0	0	0	0	0	0	0	0	0	0	0	0	0	0	0	0	0	0	0	0	0	0	1	0	0	0	0	0	0	0	0	0	1	0	0	0	0	0	0	0	0	0	1
TCGA-06-0878-01	1	0	0	0	0	0	0	0	0	0	0	0	0	0	0	0	0	0	0	0	0	0	0	0	1	0	0	0	0	0	0	0	0	0	1	0	0	0	0	0	0	0	0	0	1
TCGA-06-0879-01	1	0	0	0	0	0	0	0	0	0	0	0	0	0	0	0	0	0	0	0	0	0	0	0	1	0	0	0	0	0	0	0	0	0	1	0	0	0	0	0	0	0	0	0	1
TCGA-06-0882-01	1	0	0	0	0	0	0	0	0	0	0	0	0	0	0	0	0	0	0	0	0	0	0	0	1	0	0	0	0	0	0	0	0	0	1	0	0	0	0	0	0	0	0	0	1
TCGA-06-0939-01	1	0	0	0	0	0	0	0	0	0	0	0	0	0	0	0	0	0	0	0	0	0	0	0	1	0	0	0	0	0	0	0	0	0	1	0	0	0	0	0	0	0	0	0	1
TCGA-06-1084-01	1	0	0	0	0	0	0	0	0	0	0	0	0	0	0	0	0	0	0	0	0	0	0	0	1	0	0	0	0	0	0	0	0	0	1	0	0	0	0	0	0	0	0	0	1
TCGA-06-1800-01	1	0	0	0	0	0	0	0	0	0	0	0	0	0	0	0	0	0	0	0	0	0	0	0	1	0	0	0	0	0	0	0	0	0	1	0	0	0	0	0	0	0	0	0	1
TCGA-06-1801-01	1	0	0	0	0	0	0	0	0	0	0	0	0	0	0	0	0	0	0	0	0	0	0	0	1	0	0	0	0	0	0	0	0	0	1	0	0	0	0	0	0	0	0	0	1
TCGA-06-1802-01	1	0	0	0	0	0	0	0	0	0	0	0	0	0	0	0	0	0	0	0	0	0	0	0	1	0	0	0	0	0	0	0	0	0	1	0	0	0	0	0	0	0	0	0	1
TCGA-06-1804-01	1	0	0	0	0	0	0	0	0	0	0	0	0	0	0	0	0	0	0	0	0	0	0	0	1	0	0	0	0	0	0	0	0	0	1	0	0	0	0	0	0	0	0	0	1
TCGA-06-1805-01	1	0	0	0	0	0	0	0	0	0	0	0	0	0	0	0	0	0	0	0	0	0	0	0	1	0	0	0	0	0	0	0	0	0	1	0	0	0	0	0	0	0	0	0	1
TCGA-06-1806-01	1	0	0	0	0	0	0	0	0	0	0	0	0	0	0	0	0	0	0	0	0	0	0	0	1	0	0	0	0	0	0	0	0	0	1	0	0	0	0	0	0	0	0	0	1
TCGA-06-2557-01	1	0	0	0	0	0	0	0	0	0	0	0	0	0	0	0	0	0	0	0	0	0	0	0	1	0	0	0	0	0	0	0	0	0	1	0	0	0	0	0	0	0	0	0	1
TCGA-06-2558-01	1	0	0	0	0	0	0	0	0	0	0	0	0	0	0	0	0	0	0	0	0	0	0	0	1	0	0	0	0	0	0	0	0	0	1	0	0	0	0	0	0	0	0	0	1
TCGA-06-2559-01	1	0	0	0	0	0	0	0	0	0	0	0	0	0	0	0	0	0	0	0	0	0	0	0	1	0	0	0	0	0	0	0	0	0	1	0	0	0	0	0	0	0	0	0	1
TCGA-06-2562-01	1	0	0	0	0	0	0	0	0	0	0	0	0	0	0	0	0	0	0	0	0	0	0	0	1	0	0	0	0	0	0	0	0	0	1	0	0	0	0	0	0	0	0	0	1
TCGA-06-2563-01	1	0	0	0	0	0	0	0	0	0	0	0	0	0	0	0	0	0	0	0	0	0	0	0	1	0	0	0	0	0	0	0	0	0	1	0	0	0	0	0	0	0	0	0	1
TCGA-06-2564-01	1	0	0	0	0	0	0	0	0	0	0	0	0	0	0	0	0	0	0	0	0	0	0	0	1	0	0	0	0	0	0	0	0	0	1	0	0	0	0	0	0	0	0	0	1
TCGA-06-2565-01	1	0	0	0	0	0	0	0	0	0	0	0	0	0	0	0	0	0	0	0	0	0	0	0	1	0	0	0	0	0	0	0	0	0	1	0	0	0	0	0	0	0	0	0	1
TCGA-06-2566-01	1	0	0	0	0	0	0	0	0	0	0	0	0	0	0	0	0	0	0	0	0	0	0	0	1	0	0	0	0	0	0	0	0	0	1	0	0	0	0	0	0	0	0	0	1
TCGA-06-2567-01	1	0	0	0	0	0	0	0	0	0	0	0	0	0	0	0	0	0	0	0	0	0	0	0	1	0	0	0	0	0	0	0	0	0	1	0	0	0	0	0	0	0	0	0	1
TCGA-06-2570-01	1	0	0	0	0	0	0	0	0	0	0	0	0	0	0	0	0	0	0	0	0	0	0	0	1	0	0	0	0	0	0	0	0	0	1	0	0	0	0	0	0	0	0	0	1
TCGA-06-5408-01	1	0	0	0	0	0	0	0	0	0	0	0	0	0	0	0	0	0	0	0	0	0	0	0	1	0	0	0	0	0	0	0	0	0	1	0	0	0	0	0	0	0	0	0	1
TCGA-06-5411-01	1	0	0	0	0	0	0	0	0	0	0	0	0	0	0	0	0	0	0	0	0	0	0	0	1	0	0	0	0	0	0	0	0	0	1	0	0	0	0	0	0	0	0	0	1
TCGA-06-5412-01	1	0	0	0	0	0	0	0	0	0	0	0	0	0	0	0	0	0	0	0	0	0	0	0	1	0	0	0	0	0	0	0	0	0	1	0	0	0	0	0	0	0	0	0	1
TCGA-06-5413-01	1	0	0	0	0	0	0	0	0	0	0	0	0	0	0	0	0	0	0	0	0	0	0	0	1	0	0	0	0	0	0	0	0	0	1	0	0	0	0	0	0	0	0	0	1
TCGA-06-5414-01	1	0	0	0	0	0	0	0	0	0	0	0	0	0	0	0	0	0	0	0	0	0	0	0	1	0	0	0	0	0	0	0	0	0	1	0	0	0	0	0	0	0	0	0	1
TCGA-06-5415-01	1	0	0	0	0	0	0	0	0	0	0	0	0	0	0	0	0	0	0	0	0	0	0	0	1	0	0	0	0	0	0	0	0	0	1	0	0	0	0	0	0	0	0	0	1
TCGA-06-5418-01	1	0	0	0	0	0	0	0	0	0	0	0	0	0	0	0	0	0	0	0	0	0	0	0	1	0	0	0	0	0	0	0	0	0	1	0	0	0	0	0	0	0	0	0	1
TCGA-06-5856-01	1	0	0	0	0	0	0	0	0	0	0	0	0	0	0	0	0	0	0	0	0	0	0	0	1	0	0	0	0	0	0	0	0	0	1	0	0	0	0	0	0	0	0	0	1
TCGA-06-5858-01	1	0	0	0	0	0	0	0	0	0	0	0	0	0	0	0	0	0	0	0	0	0	0	0	1	0	0	0	0	0	0	0	0	0	1	0	0	0	0	0	0	0	0	0	1
TCGA-06-5859-01	1	0	0	0	0	0	0	0	0	0	0	0	0	0	0	0	0	0	0	0	0	0	0	0	1	0	0	0	0	0	0	0	0	0	1	0	0	0	0	0	0	0	0	0	1
TCGA-06-6388-01	1	0	0	0	0	0	0	0	0	0	0	0	0	0	0	0	0	0	0	0	0	0	0	0	1	0	0	0	0	0	0	0	0	0	1	0	0	0	0	0	0	0	0	0	1
TCGA-06-6389-01	1	0	0	0	0	0	0	0	0	0	0	0	0	0	0	0	0	0	0	0	0	0	0	0	1	0	0	0	0	0	0	0	0	0	1	0	0	0	0	0	0	0	0	0	1
TCGA-06-6693-01	1	0	0	0	0	0	0	0	0	0	0	0	0	0	0	0	0	0	0	0	0	0	0	0	1	0	0	0	0	0	0	0	0	0	1	0	0	0	0	0	0	0	0	0	1
TCGA-06-6695-01	1	0	0	0	0	0	0	0	0	0	0	0	0	0	0	0	0	0	0	0	0	0	0	0	1	0	0	0	0	0	0	0	0	0	1	0	0	0	0	0	0	0	0	0	1
TCGA-06-6697-01	1	0	0	0	0	0	0	0	0	0	0	0	0	0	0	0	0	0	0	0	0	0	0	0	1	0	0	0	0	0	0	0	0	0	1	0	0	0	0	0	0	0	0	0	1
TCGA-06-6698-01	1	0	0	0	0	0	0	0	0	0	0	0	0	0	0	0	0	0	0	0	0	0	0	0	1	0	0	0	0	0	0	0	0	0	1	0	0	0	0	0	0	0	0	0	1
TCGA-06-6699-01	1	0	0	0	0	0	0	0	0	0	0	0	0	0	0	0	0	0	0	0	0	0	0	0	1	0	0	0	0	0	0	0	0	0	1	0	0	0	0	0	0	0	0	0	1
TCGA-06-6700-01	1	0	0	0	0	0	0	0	0	0	0	0	0	0	0	0	0	0	0	0	0	0	0	0	1	0	0	0	0	0	0	0	0	0	1	0	0	0	0	0	0	0	0	0	1
TCGA-06-6701-01	1	0	0	0	0	0	0	0	0	0	0	0	0	0	0	0	0	0	0	0	0	0	0	0	1	0	0	0	0	0	0	0	0	0	1	0	0	0	0	0	0	0	0	0	1
TCGA-06-A5U1-01	1	0	0	0	0	0	0	0	0	0	0	0	0	0	0	0	0	0	0	0	0	0	0	0	1	0	0	0	0	0	0	0	0	0	1	0	0	0	0	0	0	0	0	0	1
TCGA-06-A6S0-01	1	0	0	0	0	0	0	0	0	0	0	0	0	0	0	0	0	0	0	0	0	0	0	0	1	0	0	0	0	0	0	0	0	0	1	0	0	0	0	0	0	0	0	0	1
TCGA-06-A6S1-01	1	0	0	0	0	0	0	0	0	0	0	0	0	0	0	0	0	0	0	0	0	0	0	0	1	0	0	0	0	0	0	0	0	0	1	0	0	0	0	0	0	0	0	0	1
TCGA-06-A7TK-01	1	0	0	0	0	0	0	0	0	0	0	0	0	0	0	0	0	0	0	0	0	0	0	0	1	0	0	0	0	0	0	0	0	0	1	0	0	0	0	0	0	0	0	0	1
TCGA-06-A7TL-01	1	0	0	0	0	0	0	0	0	0	0	0	0	0	0	0	0	0	0	0	0	0	0	0	1	0	0	0	0	0	0	0	0	0	1	0	0	0	0	0	0	0	0	0	1
TCGA-08-0244-01	1	0	0	0	0	0	0	0	0	0	0	0	0	0	0	0	0	0	0	0	0	0	0	0	1	0	0	0	0	0	0	0	0	0	1	0	0	0	0	0	0	0	0	0	1
TCGA-08-0245-01	1	0	0	0	0	0	0	0	0	0	0	0	0	0	0	0	0	0	0	0	0	0	0	0	1	0	0	0	0	0	0	0	0	0	1	0	0	0	0	0	0	0	0	0	1
TCGA-08-0344-01	1	0	0	0	0	0	0	0	0	0	0	0	0	0	0	0	0	0	0	0	0	0	0	0	1	0	0	0	0	0	0	0	0	0	1	0	0	0	0	0	0	0	0	0	1
TCGA-08-0345-01	1	0	0	0	0	0	0	0	0	0	0	0	0	0	0	0	0	0	0	0	0	0	0	0	1	0	0	0	0	0	0	0	0	0	1	0	0	0	0	0	0	0	0	0	1
TCGA-08-0346-01	1	0	0	0	0	0	0	0	0	0	0	0	0	0	0	0	0	0	0	0	0	0	0	0	1	0	0	0	0	0	0	0	0	0	1	0	0	0	0	0	0	0	0	0	1
TCGA-08-0347-01	1	0	0	0	0	0	0	0	0	0	0	0	0	0	0	0	0	0	0	0	0	0	0	0	1	0	0	0	0	0	0	0	0	0	1	0	0	0	0	0	0	0	0	0	1
TCGA-08-0348-01	1	0	0	0	0	0	0	0	0	0	0	0	0	0	0	0	0	0	0	0	0	0	0	0	1	0	0	0	0	0	0	0	0	0	1	0	0	0	0	0	0	0	0	0	1
TCGA-08-0349-01	1	0	0	0	0	0	0	0	0	0	0	0	0	0	0	0	0	0	0	0	0	0	0	0	1	0	0	0	0	0	0	0	0	0	1	0	0	0	0	0	0	0	0	0	1
TCGA-08-0350-01	1	0	0	0	0	0	0	0	0	0	0	0	0	0	0	0	0	0	0	0	0	0	0	0	1	0	0	0	0	0	0	0	0	0	1	0	0	0	0	0	0	0	0	0	1
TCGA-08-0351-01	1	0	0	0	0	0	0	0	0	0	0	0	0	0	0	0	0	0	0	0	0	0	0	0	1	0	0	0	0	0	0	0	0	0	1	0	0	0	0	0	0	0	0	0	1
TCGA-08-0352-01	1	0	0	0	0	0	0	0	0	0	0	0	0	0	0	0	0	0	0	0	0	0	0	0	1	0	0	0	0	0	0	0	0	0	1	0	0	0	0	0	0	0	0	0	1
TCGA-08-0353-01	1	0	0	0	0	0	0	0	0	0	0	0	0	0	0	0	0	0	0	0	0	0	0	0	1	0	0	0	0	0	0	0	0	0	1	0	0	0	0	0	0	0	0	0	1
TCGA-08-0354-01	1	0	0	0	0	0	0	0	0	0	0	0	0	0	0	0	0	0	0	0	0	0	0	0	1	0	0	0	0	0	0	0	0	0	1	0	0	0	0	0	0	0	0	0	1
TCGA-08-0355-01	1	0	0	0	0	0	0	0	0	0	0	0	0	0	0	0	0	0	0	0	0	0	0	0	1	0	0	0	0	0	0	0	0	0	1	0	0	0	0	0	0	0	0	0	1
TCGA-08-0356-01	1	0	0	0	0	0	0	0	0	0	0	0	0	0	0	0	0	0	0	0	0	0	0	0	1	0	0	0	0	0	0	0	0	0	1	0	0	0	0	0	0	0	0	0	1
TCGA-08-0357-01	1	0	0	0	0	0	0	0	0	0	0	0	0	0	0	0	0	0	0	0	0	0	0	0	1	0	0	0	0	0	0	0	0	0	1	0	0	0	0	0	0	0	0	0	1
TCGA-08-0358-01	1	0	0	0	0	0	0	0	0	0	0	0	0	0	0	0	0	0	0	0	0	0	0	0	1	0	0	0	0	0	0	0	0	0	1	0	0	0	0	0	0	0	0	0	1
TCGA-08-0359-01	1	0	0	0	0	0	0	0	0	0	0	0	0	0	0	0	0	0	0	0	0	0	0	0	1	0	0	0	0	0	0	0	0	0	1	0	0	0	0	0	0	0	0	0	1
TCGA-08-0375-01	1	0	0	0	0	0	0	0	0	0	0	0	0	0	0	0	0	0	0	0	0	0	0	0	1	0	0	0	0	0	0	0	0	0	1	0	0	0	0	0	0	0	0	0	1
TCGA-08-0380-01	1	0	0	0	0	0	0	0	0	0	0	0	0	0	0	0	0	0	0	0	0	0	0	0	1	0	0	0	0	0	0	0	0	0	1	0	0	0	0	0	0	0	0	0	1
TCGA-08-0386-01	1	0	0	0	0	0	0	0	0	0	0	0	0	0	0	0	0	0	0	0	0	0	0	0	1	0	0	0	0	0	0	0	0	0	1	0	0	0	0	0	0	0	0	0	1
TCGA-08-0389-01	1	0	0	0	0	0	0	0	0	0	0	0	0	0	0	0	0	0	0	0	0	0	0	0	1	0	0	0	0	0	0	0	0	0	1	0	0	0	0	0	0	0	0	0	1
TCGA-08-0390-01	1	0	0	0	0	0	0	0	0	0	0	0	0	0	0	0	0	0	0	0	0	0	0	0	1	0	0	0	0	0	0	0	0	0	1	0	0	0	0	0	0	0	0	0	1
TCGA-08-0392-01	1	0	0	0	0	0	0	0	0	0	0	0	0	0	0	0	0	0	0	0	0	0	0	0	1	0	0	0	0	0	0	0	0	0	1	0	0	0	0	0	0	0	0	0	1
TCGA-08-0509-01	1	0	0	0	0	0	0	0	0	0	0	0	0	0	0	0	0	0	0	0	0	0	0	0	1	0	0	0	0	0	0	0	0	0	1	0	0	0	0	0	0	0	0	0	1
TCGA-08-0512-01	1	0	0	0	0	0	0	0	0	0	0	0	0	0	0	0	0	0	0	0	0	0	0	0	1	0	0	0	0	0	0	0	0	0	1	0	0	0	0	0	0	0	0	0	1
TCGA-08-0514-01	1	0	0	0	0	0	0	0	0	0	0	0	0	0	0	0	0	0	0	0	0	0	0	0	1	0	0	0	0	0	0	0	0	0	1	0	0	0	0	0	0	0	0	0	1
TCGA-08-0516-01	1	0	0	0	0	0	0	0	0	0	0	0	0	0	0	0	0	0	0	0	0	0	0	0	1	0	0	0	0	0	0	0	0	0	1	0	0	0	0	0	0	0	0	0	1
TCGA-08-0517-01	1	0	0	0	0	0	0	0	0	0	0	0	0	0	0	0	0	0	0	0	0	0	0	0	1	0	0	0	0	0	0	0	0	0	1	0	0	0	0	0	0	0	0	0	1
TCGA-08-0518-01	1	0	0	0	0	0	0	0	0	0	0	0	0	0	0	0	0	0	0	0	0	0	0	0	1	0	0	0	0	0	0	0	0	0	1	0	0	0	0	0	0	0	0	0	1
TCGA-08-0520-01	1	0	0	0	0	0	0	0	0	0	0	0	0	0	0	0	0	0	0	0	0	0	0	0	1	0	0	0	0	0	0	0	0	0	1	0	0	0	0	0	0	0	0	0	1
TCGA-08-0521-01	1	0	0	0	0	0	0	0	0	0	0	0	0	0	0	0	0	0	0	0	0	0	0	0	1	0	0	0	0	0	0	0	0	0	1	0	0	0	0	0	0	0	0	0	1
TCGA-08-0524-01	1	0	0	0	0	0	0	0	0	0	0	0	0	0	0	0	0	0	0	0	0	0	0	0	1	0	0	0	0	0	0	0	0	0	1	0	0	0	0	0	0	0	0	0	1
TCGA-08-0525-01	1	0	0	0	0	0	0	0	0	0	0	0	0	0	0	0	0	0	0	0	0	0	0	0	1	0	0	0	0	0	0	0	0	0	1	0	0	0	0	0	0	0	0	0	1
TCGA-08-0529-01	1	0	0	0	0	0	0	0	0	0	0	0	0	0	0	0	0	0	0	0	0	0	0	0	1	0	0	0	0	0	0	0	0	0	1	0	0	0	0	0	0	0	0	0	1
TCGA-08-0531-01	1	0	0	0	0	0	0	0	0	0	0	0	0	0	0	0	0	0	0	0	0	0	0	0	1	0	0	0	0	0	0	0	0	0	1	0	0	0	0	0	0	0	0	0	1
TCGA-09-1662-01	0	0	0	0	0	0	0	0	0	0	0	0	0	0	0	0	0	0	0	0	0	0	0	0	1	0	0	0	0	0	0	0	0	1	0	0	0	0	0	0	0	0	0	0	1
TCGA-09-1664-01	0	0	0	0	0	0	0	0	0	0	0	0	0	0	0	0	0	0	0	0	0	0	0	0	1	0	0	0	0	0	0	0	0	1	0	0	0	0	0	0	0	0	0	0	1
TCGA-09-1666-01	0	0	0	0	0	0	0	0	0	0	0	0	0	0	0	0	0	0	0	0	0	0	0	0	1	0	0	0	0	0	0	0	0	1	0	0	0	0	0	0	0	0	0	0	1
TCGA-09-1669-01	0	0	0	0	0	0	0	0	0	0	0	0	0	0	0	0	0	0	0	0	0	0	0	0	1	0	0	0	0	0	0	0	0	1	0	0	0	0	0	0	0	0	0	0	1
TCGA-09-1675-01	0	0	0	0	0	0	0	0	0	0	0	0	0	0	0	0	0	0	0	0	0	0	0	0	1	0	0	0	0	0	0	0	0	1	0	0	0	0	0	0	0	0	0	0	1
TCGA-09-2044-01	0	0	0	0	0	0	0	0	0	0	0	0	0	0	0	0	0	0	0	0	0	0	0	0	1	0	0	0	0	0	0	0	0	1	0	0	0	0	0	0	0	0	0	0	1
TCGA-09-2050-01	0	0	0	0	0	0	0	0	0	0	0	0	0	0	0	0	0	0	0	0	0	0	0	0	1	0	0	0	0	0	0	0	0	1	0	0	0	0	0	0	0	0	0	0	1
TCGA-09-2053-01	0	0	0	0	0	0	0	0	0	0	0	0	0	0	0	0	0	0	0	0	0	0	0	0	1	0	0	0	0	0	0	0	0	1	0	0	0	0	0	0	0	0	0	0	1
TCGA-09-2055-01	0	0	0	0	0	0	0	0	0	0	0	0	0	0	0	0	0	0	0	0	0	0	0	0	1	0	0	0	0	0	0	0	0	1	0	0	0	0	0	0	0	0	0	0	1
TCGA-10-0925-01	0	0	0	0	0	0	0	0	0	0	0	0	0	0	0	0	0	0	0	0	0	0	0	0	1	0	0	0	0	0	0	0	0	1	0	0	0	0	0	0	0	0	0	0	1
TCGA-10-0928-01	0	0	0	0	0	0	0	0	0	0	0	0	0	0	0	0	0	0	0	0	0	0	0	0	1	0	0	0	0	0	0	0	0	1	0	0	0	0	0	0	0	0	0	0	1
TCGA-10-0931-01	0	0	0	0	0	0	0	0	0	0	0	0	0	0	0	0	0	0	0	0	0	0	0	0	1	0	0	0	0	0	0	0	0	1	0	0	0	0	0	0	0	0	0	0	1
TCGA-10-0934-01	0	0	0	0	0	0	0	0	0	0	0	0	0	0	0	0	0	0	0	0	0	0	0	0	1	0	0	0	0	0	0	0	0	1	0	0	0	0	0	0	0	0	0	0	1
TCGA-10-0937-01	0	0	0	0	0	0	0	0	0	0	0	0	0	0	0	0	0	0	0	0	0	0	0	0	1	0	0	0	0	0	0	0	0	1	0	0	0	0	0	0	0	0	0	0	1
TCGA-12-0615-01	1	0	0	0	0	0	0	0	0	0	0	0	0	0	0	0	0	0	0	0	0	0	0	0	1	0	0	0	0	0	0	0	0	0	1	0	0	0	0	0	0	0	0	0	1
TCGA-12-0616-01	1	0	0	0	0	0	0	0	0	0	0	0	0	0	0	0	0	0	0	0	0	0	0	0	1	0	0	0	0	0	0	0	0	0	1	0	0	0	0	0	0	0	0	0	1
TCGA-12-0618-01	1	0	0	0	0	0	0	0	0	0	0	0	0	0	0	0	0	0	0	0	0	0	0	0	1	0	0	0	0	0	0	0	0	0	1	0	0	0	0	0	0	0	0	0	1
TCGA-12-0619-01	1	0	0	0	0	0	0	0	0	0	0	0	0	0	0	0	0	0	0	0	0	0	0	0	1	0	0	0	0	0	0	0	0	0	1	0	0	0	0	0	0	0	0	0	1
TCGA-12-0620-01	1	0	0	0	0	0	0	0	0	0	0	0	0	0	0	0	0	0	0	0	0	0	0	0	1	0	0	0	0	0	0	0	0	0	1	0	0	0	0	0	0	0	0	0	1
TCGA-12-0654-01	1	0	0	0	0	0	0	0	0	0	0	0	0	0	0	0	0	0	0	0	0	0	0	0	1	0	0	0	0	0	0	0	0	0	1	0	0	0	0	0	0	0	0	0	1
TCGA-12-0656-01	1	0	0	0	0	0	0	0	0	0	0	0	0	0	0	0	0	0	0	0	0	0	0	0	1	0	0	0	0	0	0	0	0	0	1	0	0	0	0	0	0	0	0	0	1
TCGA-12-0657-01	1	0	0	0	0	0	0	0	0	0	0	0	0	0	0	0	0	0	0	0	0	0	0	0	1	0	0	0	0	0	0	0	0	0	1	0	0	0	0	0	0	0	0	0	1
TCGA-12-0662-01	1	0	0	0	0	0	0	0	0	0	0	0	0	0	0	0	0	0	0	0	0	0	0	0	1	0	0	0	0	0	0	0	0	0	1	0	0	0	0	0	0	0	0	0	1
TCGA-12-0670-01	1	0	0	0	0	0	0	0	0	0	0	0	0	0	0	0	0	0	0	0	0	0	0	0	1	0	0	0	0	0	0	0	0	0	1	0	0	0	0	0	0	0	0	0	1
TCGA-12-0688-01	1	0	0	0	0	0	0	0	0	0	0	0	0	0	0	0	0	0	0	0	0	0	0	0	1	0	0	0	0	0	0	0	0	0	1	0	0	0	0	0	0	0	0	0	1
TCGA-12-0691-01	1	0	0	0	0	0	0	0	0	0	0	0	0	0	0	0	0	0	0	0	0	0	0	0	1	0	0	0	0	0	0	0	0	0	1	0	0	0	0	0	0	0	0	0	1
TCGA-12-0692-01	1	0	0	0	0	0	0	0	0	0	0	0	0	0	0	0	0	0	0	0	0	0	0	0	1	0	0	0	0	0	0	0	0	0	1	0	0	0	0	0	0	0	0	0	1
TCGA-12-0703-01	1	0	0	0	0	0	0	0	0	0	0	0	0	0	0	0	0	0	0	0	0	0	0	0	1	0	0	0	0	0	0	0	0	0	1	0	0	0	0	0	0	0	0	0	1
TCGA-12-0707-01	1	0	0	0	0	0	0	0	0	0	0	0	0	0	0	0	0	0	0	0	0	0	0	0	1	0	0	0	0	0	0	0	0	0	1	0	0	0	0	0	0	0	0	0	1
TCGA-12-0769-01	1	0	0	0	0	0	0	0	0	0	0	0	0	0	0	0	0	0	0	0	0	0	0	0	1	0	0	0	0	0	0	0	0	0	1	0	0	0	0	0	0	0	0	0	1
TCGA-12-0772-01	1	0	0	0	0	0	0	0	0	0	0	0	0	0	0	0	0	0	0	0	0	0	0	0	1	0	0	0	0	0	0	0	0	0	1	0	0	0	0	0	0	0	0	0	1
TCGA-12-0773-01	1	0	0	0	0	0	0	0	0	0	0	0	0	0	0	0	0	0	0	0	0	0	0	0	1	0	0	0	0	0	0	0	0	0	1	0	0	0	0	0	0	0	0	0	1
TCGA-12-0775-01	1	0	0	0	0	0	0	0	0	0	0	0	0	0	0	0	0	0	0	0	0	0	0	0	1	0	0	0	0	0	0	0	0	0	1	0	0	0	0	0	0	0	0	0	1
TCGA-12-0776-01	1	0	0	0	0	0	0	0	0	0	0	0	0	0	0	0	0	0	0	0	0	0	0	0	1	0	0	0	0	0	0	0	0	0	1	0	0	0	0	0	0	0	0	0	1
TCGA-12-0778-01	1	0	0	0	0	0	0	0	0	0	0	0	0	0	0	0	0	0	0	0	0	0	0	0	1	0	0	0	0	0	0	0	0	0	1	0	0	0	0	0	0	0	0	0	1
TCGA-12-0780-01	1	0	0	0	0	0	0	0	0	0	0	0	0	0	0	0	0	0	0	0	0	0	0	0	1	0	0	0	0	0	0	0	0	0	1	0	0	0	0	0	0	0	0	0	1
TCGA-12-0818-01	1	0	0	0	0	0	0	0	0	0	0	0	0	0	0	0	0	0	0	0	0	0	0	0	1	0	0	0	0	0	0	0	0	0	1	0	0	0	0	0	0	0	0	0	1
TCGA-12-0819-01	1	0	0	0	0	0	0	0	0	0	0	0	0	0	0	0	0	0	0	0	0	0	0	0	1	0	0	0	0	0	0	0	0	0	1	0	0	0	0	0	0	0	0	0	1
TCGA-12-0820-01	1	0	0	0	0	0	0	0	0	0	0	0	0	0	0	0	0	0	0	0	0	0	0	0	1	0	0	0	0	0	0	0	0	0	1	0	0	0	0	0	0	0	0	0	1
TCGA-12-0821-01	1	0	0	0	0	0	0	0	0	0	0	0	0	0	0	0	0	0	0	0	0	0	0	0	1	0	0	0	0	0	0	0	0	0	1	0	0	0	0	0	0	0	0	0	1
TCGA-12-0822-01	1	0	0	0	0	0	0	0	0	0	0	0	0	0	0	0	0	0	0	0	0	0	0	0	1	0	0	0	0	0	0	0	0	0	1	0	0	0	0	0	0	0	0	0	1
TCGA-12-0827-01	1	0	0	0	0	0	0	0	0	0	0	0	0	0	0	0	0	0	0	0	0	0	0	0	1	0	0	0	0	0	0	0	0	0	1	0	0	0	0	0	0	0	0	0	1
TCGA-12-0828-01	1	0	0	0	0	0	0	0	0	0	0	0	0	0	0	0	0	0	0	0	0	0	0	0	1	0	0	0	0	0	0	0	0	0	1	0	0	0	0	0	0	0	0	0	1
TCGA-12-0829-01	1	0	0	0	0	0	0	0	0	0	0	0	0	0	0	0	0	0	0	0	0	0	0	0	1	0	0	0	0	0	0	0	0	0	1	0	0	0	0	0	0	0	0	0	1
TCGA-12-1088-01	1	0	0	0	0	0	0	0	0	0	0	0	0	0	0	0	0	0	0	0	0	0	0	0	1	0	0	0	0	0	0	0	0	0	1	0	0	0	0	0	0	0	0	0	1
TCGA-12-1089-01	1	0	0	0	0	0	0	0	0	0	0	0	0	0	0	0	0	0	0	0	0	0	0	0	1	0	0	0	0	0	0	0	0	0	1	0	0	0	0	0	0	0	0	0	1
TCGA-12-1091-01	1	0	0	0	0	0	0	0	0	0	0	0	0	0	0	0	0	0	0	0	0	0	0	0	1	0	0	0	0	0	0	0	0	0	1	0	0	0	0	0	0	0	0	0	1
TCGA-12-1092-01	1	0	0	0	0	0	0	0	0	0	0	0	0	0	0	0	0	0	0	0	0	0	0	0	1	0	0	0	0	0	0	0	0	0	1	0	0	0	0	0	0	0	0	0	1
TCGA-12-1093-01	1	0	0	0	0	0	0	0	0	0	0	0	0	0	0	0	0	0	0	0	0	0	0	0	1	0	0	0	0	0	0	0	0	0	1	0	0	0	0	0	0	0	0	0	1
TCGA-12-1094-01	1	0	0	0	0	0	0	0	0	0	0	0	0	0	0	0	0	0	0	0	0	0	0	0	1	0	0	0	0	0	0	0	0	0	1	0	0	0	0	0	0	0	0	0	1
TCGA-12-1095-01	1	0	0	0	0	0	0	0	0	0	0	0	0	0	0	0	0	0	0	0	0	0	0	0	1	0	0	0	0	0	0	0	0	0	1	0	0	0	0	0	0	0	0	0	1
TCGA-12-1096-01	1	0	0	0	0	0	0	0	0	0	0	0	0	0	0	0	0	0	0	0	0	0	0	0	1	0	0	0	0	0	0	0	0	0	1	0	0	0	0	0	0	0	0	0	1
TCGA-12-1097-01	1	0	0	0	0	0	0	0	0	0	0	0	0	0	0	0	0	0	0	0	0	0	0	0	1	0	0	0	0	0	0	0	0	0	1	0	0	0	0	0	0	0	0	0	1
TCGA-12-1098-01	1	0	0	0	0	0	0	0	0	0	0	0	0	0	0	0	0	0	0	0	0	0	0	0	1	0	0	0	0	0	0	0	0	0	1	0	0	0	0	0	0	0	0	0	1
TCGA-12-1598-01	1	0	0	0	0	0	0	0	0	0	0	0	0	0	0	0	0	0	0	0	0	0	0	0	1	0	0	0	0	0	0	0	0	0	1	0	0	0	0	0	0	0	0	0	1
TCGA-12-1599-01	1	0	0	0	0	0	0	0	0	0	0	0	0	0	0	0	0	0	0	0	0	0	0	0	1	0	0	0	0	0	0	0	0	0	1	0	0	0	0	0	0	0	0	0	1
TCGA-12-1600-01	1	0	0	0	0	0	0	0	0	0	0	0	0	0	0	0	0	0	0	0	0	0	0	0	1	0	0	0	0	0	0	0	0	0	1	0	0	0	0	0	0	0	0	0	1
TCGA-12-3644-01	1	0	0	0	0	0	0	0	0	0	0	0	0	0	0	0	0	0	0	0	0	0	0	0	1	0	0	0	0	0	0	0	0	0	1	0	0	0	0	0	0	0	0	0	1
TCGA-12-3646-01	1	0	0	0	0	0	0	0	0	0	0	0	0	0	0	0	0	0	0	0	0	0	0	0	1	0	0	0	0	0	0	0	0	0	1	0	0	0	0	0	0	0	0	0	1
TCGA-12-3648-01	1	0	0	0	0	0	0	0	0	0	0	0	0	0	0	0	0	0	0	0	0	0	0	0	1	0	0	0	0	0	0	0	0	0	1	0	0	0	0	0	0	0	0	0	1
TCGA-12-3649-01	1	0	0	0	0	0	0	0	0	0	0	0	0	0	0	0	0	0	0	0	0	0	0	0	1	0	0	0	0	0	0	0	0	0	1	0	0	0	0	0	0	0	0	0	1
TCGA-12-3650-01	1	0	0	0	0	0	0	0	0	0	0	0	0	0	0	0	0	0	0	0	0	0	0	0	1	0	0	0	0	0	0	0	0	0	1	0	0	0	0	0	0	0	0	0	1
TCGA-12-3651-01	1	0	0	0	0	0	0	0	0	0	0	0	0	0	0	0	0	0	0	0	0	0	0	0	1	0	0	0	0	0	0	0	0	0	1	0	0	0	0	0	0	0	0	0	1
TCGA-12-3652-01	1	0	0	0	0	0	0	0	0	0	0	0	0	0	0	0	0	0	0	0	0	0	0	0	1	0	0	0	0	0	0	0	0	0	1	0	0	0	0	0	0	0	0	0	1
TCGA-12-5295-01	1	0	0	0	0	0	0	0	0	0	0	0	0	0	0	0	0	0	0	0	0	0	0	0	1	0	0	0	0	0	0	0	0	0	1	0	0	0	0	0	0	0	0	0	1
TCGA-12-5299-01	1	0	0	0	0	0	0	0	0	0	0	0	0	0	0	0	0	0	0	0	0	0	0	0	1	0	0	0	0	0	0	0	0	0	1	0	0	0	0	0	0	0	0	0	1
TCGA-12-5301-01	1	0	0	0	0	0	0	0	0	0	0	0	0	0	0	0	0	0	0	0	0	0	0	0	1	0	0	0	0	0	0	0	0	0	1	0	0	0	0	0	0	0	0	0	1
TCGA-13-0714-01	0	0	0	0	0	0	0	0	0	0	0	0	0	0	0	0	0	0	0	0	0	0	0	0	1	0	0	0	0	0	0	0	0	1	0	0	0	0	0	0	0	0	0	0	1
TCGA-13-0720-01	0	0	0	0	0	0	0	0	0	0	0	0	0	0	0	0	0	0	0	0	0	0	0	0	1	0	0	0	0	0	0	0	0	1	0	0	0	0	0	0	0	0	0	0	1
TCGA-13-0725-01	0	0	0	0	0	0	0	0	0	0	0	0	0	0	0	0	0	0	0	0	0	0	0	0	1	0	0	0	0	0	0	0	0	1	0	0	0	0	0	0	0	0	0	0	1
TCGA-13-0726-01	0	0	0	0	0	0	0	0	0	0	0	0	0	0	0	0	0	0	0	0	0	0	0	0	1	0	0	0	0	0	0	0	0	1	0	0	0	0	0	0	0	0	0	0	1
TCGA-13-0755-01	0	0	0	0	0	0	0	0	0	0	0	0	0	0	0	0	0	0	0	0	0	0	0	0	1	0	0	0	0	0	0	0	0	1	0	0	0	0	0	0	0	0	0	0	1
TCGA-13-0766-01	0	0	0	0	0	0	0	0	0	0	0	0	0	0	0	0	0	0	0	0	0	0	0	0	1	0	0	0	0	0	0	0	0	1	0	0	0	0	0	0	0	0	0	0	1
TCGA-13-0768-01	0	0	0	0	0	0	0	0	0	0	0	0	0	0	0	0	0	0	0	0	0	0	0	0	1	0	0	0	0	0	0	0	0	1	0	0	0	0	0	0	0	0	0	0	1
TCGA-13-0791-01	0	0	0	0	0	0	0	0	0	0	0	0	0	0	0	0	0	0	0	0	0	0	0	0	1	0	0	0	0	0	0	0	0	1	0	0	0	0	0	0	0	0	0	0	1
TCGA-13-0793-01	0	0	0	0	0	0	0	0	0	0	0	0	0	0	0	0	0	0	0	0	0	0	0	0	1	0	0	0	0	0	0	0	0	1	0	0	0	0	0	0	0	0	0	0	1
TCGA-13-0797-01	0	0	0	0	0	0	0	0	0	0	0	0	0	0	0	0	0	0	0	0	0	0	0	0	1	0	0	0	0	0	0	0	0	1	0	0	0	0	0	0	0	0	0	0	1
TCGA-13-0799-01	0	0	0	0	0	0	0	0	0	0	0	0	0	0	0	0	0	0	0	0	0	0	0	0	1	0	0	0	0	0	0	0	0	1	0	0	0	0	0	0	0	0	0	0	1
TCGA-13-0801-01	0	0	0	0	0	0	0	0	0	0	0	0	0	0	0	0	0	0	0	0	0	0	0	0	1	0	0	0	0	0	0	0	0	1	0	0	0	0	0	0	0	0	0	0	1
TCGA-13-0804-01	0	0	0	0	0	0	0	0	0	0	0	0	0	0	0	0	0	0	0	0	0	0	0	0	1	0	0	0	0	0	0	0	0	1	0	0	0	0	0	0	0	0	0	0	1
TCGA-13-0805-01	0	0	0	0	0	0	0	0	0	0	0	0	0	0	0	0	0	0	0	0	0	0	0	0	1	0	0	0	0	0	0	0	0	1	0	0	0	0	0	0	0	0	0	0	1
TCGA-13-0886-01	0	0	0	0	0	0	0	0	0	0	0	0	0	0	0	0	0	0	0	0	0	0	0	0	1	0	0	0	0	0	0	0	0	1	0	0	0	0	0	0	0	0	0	0	1
TCGA-13-0887-01	0	0	0	0	0	0	0	0	0	0	0	0	0	0	0	0	0	0	0	0	0	0	0	0	1	0	0	0	0	0	0	0	0	1	0	0	0	0	0	0	0	0	0	0	1
TCGA-13-0889-01	0	0	0	0	0	0	0	0	0	0	0	0	0	0	0	0	0	0	0	0	0	0	0	0	1	0	0	0	0	0	0	0	0	1	0	0	0	0	0	0	0	0	0	0	1
TCGA-13-0890-01	0	0	0	0	0	0	0	0	0	0	0	0	0	0	0	0	0	0	0	0	0	0	0	0	1	0	0	0	0	0	0	0	0	1	0	0	0	0	0	0	0	0	0	0	1
TCGA-13-0897-01	0	0	0	0	0	0	0	0	0	0	0	0	0	0	0	0	0	0	0	0	0	0	0	0	1	0	0	0	0	0	0	0	0	1	0	0	0	0	0	0	0	0	0	0	1
TCGA-13-0900-01	0	0	0	0	0	0	0	0	0	0	0	0	0	0	0	0	0	0	0	0	0	0	0	0	1	0	0	0	0	0	0	0	0	1	0	0	0	0	0	0	0	0	0	0	1
TCGA-13-0903-01	0	0	0	0	0	0	0	0	0	0	0	0	0	0	0	0	0	0	0	0	0	0	0	0	1	0	0	0	0	0	0	0	0	1	0	0	0	0	0	0	0	0	0	0	1
TCGA-13-0905-01	0	0	0	0	0	0	0	0	0	0	0	0	0	0	0	0	0	0	0	0	0	0	0	0	1	0	0	0	0	0	0	0	0	1	0	0	0	0	0	0	0	0	0	0	1
TCGA-13-0906-01	0	0	0	0	0	0	0	0	0	0	0	0	0	0	0	0	0	0	0	0	0	0	0	0	1	0	0	0	0	0	0	0	0	1	0	0	0	0	0	0	0	0	0	0	1
TCGA-13-0908-01	0	0	0	0	0	0	0	0	0	0	0	0	0	0	0	0	0	0	0	0	0	0	0	0	1	0	0	0	0	0	0	0	0	1	0	0	0	0	0	0	0	0	0	0	1
TCGA-13-0910-01	0	0	0	0	0	0	0	0	0	0	0	0	0	0	0	0	0	0	0	0	0	0	0	0	1	0	0	0	0	0	0	0	0	1	0	0	0	0	0	0	0	0	0	0	1
TCGA-13-0912-01	0	0	0	0	0	0	0	0	0	0	0	0	0	0	0	0	0	0	0	0	0	0	0	0	1	0	0	0	0	0	0	0	0	1	0	0	0	0	0	0	0	0	0	0	1
TCGA-13-0913-01	0	0	0	0	0	0	0	0	0	0	0	0	0	0	0	0	0	0	0	0	0	0	0	0	1	0	0	0	0	0	0	0	0	1	0	0	0	0	0	0	0	0	0	0	1
TCGA-13-0916-01	0	0	0	0	0	0	0	0	0	0	0	0	0	0	0	0	0	0	0	0	0	0	0	0	1	0	0	0	0	0	0	0	0	1	0	0	0	0	0	0	0	0	0	0	1
TCGA-13-0924-01	0	0	0	0	0	0	0	0	0	0	0	0	0	0	0	0	0	0	0	0	0	0	0	0	1	0	0	0	0	0	0	0	0	1	0	0	0	0	0	0	0	0	0	0	1
TCGA-13-1403-01	0	0	0	0	0	0	0	0	0	0	0	0	0	0	0	0	0	0	0	0	0	0	0	0	1	0	0	0	0	0	0	0	0	1	0	0	0	0	0	0	0	0	0	0	1
TCGA-13-1404-01	0	0	0	0	0	0	0	0	0	0	0	0	0	0	0	0	0	0	0	0	0	0	0	0	1	0	0	0	0	0	0	0	0	1	0	0	0	0	0	0	0	0	0	0	1
TCGA-13-1405-01	0	0	0	0	0	0	0	0	0	0	0	0	0	0	0	0	0	0	0	0	0	0	0	0	1	0	0	0	0	0	0	0	0	1	0	0	0	0	0	0	0	0	0	0	1
TCGA-13-1412-01	0	0	0	0	0	0	0	0	0	0	0	0	0	0	0	0	0	0	0	0	0	0	0	0	1	0	0	0	0	0	0	0	0	1	0	0	0	0	0	0	0	0	0	0	1
TCGA-13-1477-01	0	0	0	0	0	0	0	0	0	0	0	0	0	0	0	0	0	0	0	0	0	0	0	0	1	0	0	0	0	0	0	0	0	1	0	0	0	0	0	0	0	0	0	0	1
TCGA-13-1481-01	0	0	0	0	0	0	0	0	0	0	0	0	0	0	0	0	0	0	0	0	0	0	0	0	1	0	0	0	0	0	0	0	0	1	0	0	0	0	0	0	0	0	0	0	1
TCGA-13-1482-01	0	0	0	0	0	0	0	0	0	0	0	0	0	0	0	0	0	0	0	0	0	0	0	0	1	0	0	0	0	0	0	0	0	1	0	0	0	0	0	0	0	0	0	0	1
TCGA-13-1483-01	0	0	0	0	0	0	0	0	0	0	0	0	0	0	0	0	0	0	0	0	0	0	0	0	1	0	0	0	0	0	0	0	0	1	0	0	0	0	0	0	0	0	0	0	1
TCGA-13-1485-01	0	0	0	0	0	0	0	0	0	0	0	0	0	0	0	0	0	0	0	0	0	0	0	0	1	0	0	0	0	0	0	0	0	1	0	0	0	0	0	0	0	0	0	0	1
TCGA-13-1491-01	0	0	0	0	0	0	0	0	0	0	0	0	0	0	0	0	0	0	0	0	0	0	0	0	1	0	0	0	0	0	0	0	0	1	0	0	0	0	0	0	0	0	0	0	1
TCGA-13-1492-01	0	0	0	0	0	0	0	0	0	0	0	0	0	0	0	0	0	0	0	0	0	0	0	0	1	0	0	0	0	0	0	0	0	1	0	0	0	0	0	0	0	0	0	0	1
TCGA-13-1494-01	0	0	0	0	0	0	0	0	0	0	0	0	0	0	0	0	0	0	0	0	0	0	0	0	1	0	0	0	0	0	0	0	0	1	0	0	0	0	0	0	0	0	0	0	1
TCGA-13-1498-01	0	0	0	0	0	0	0	0	0	0	0	0	0	0	0	0	0	0	0	0	0	0	0	0	1	0	0	0	0	0	0	0	0	1	0	0	0	0	0	0	0	0	0	0	1
TCGA-13-1500-01	0	0	0	0	0	0	0	0	0	0	0	0	0	0	0	0	0	0	0	0	0	0	0	0	1	0	0	0	0	0	0	0	0	1	0	0	0	0	0	0	0	0	0	0	1
TCGA-13-1501-01	0	0	0	0	0	0	0	0	0	0	0	0	0	0	0	0	0	0	0	0	0	0	0	0	1	0	0	0	0	0	0	0	0	1	0	0	0	0	0	0	0	0	0	0	1
TCGA-13-1505-01	0	0	0	0	0	0	0	0	0	0	0	0	0	0	0	0	0	0	0	0	0	0	0	0	1	0	0	0	0	0	0	0	0	1	0	0	0	0	0	0	0	0	0	0	1
TCGA-13-1509-01	0	0	0	0	0	0	0	0	0	0	0	0	0	0	0	0	0	0	0	0	0	0	0	0	1	0	0	0	0	0	0	0	0	1	0	0	0	0	0	0	0	0	0	0	1
TCGA-13-1510-01	0	0	0	0	0	0	0	0	0	0	0	0	0	0	0	0	0	0	0	0	0	0	0	0	1	0	0	0	0	0	0	0	0	1	0	0	0	0	0	0	0	0	0	0	1
TCGA-13-1511-01	0	0	0	0	0	0	0	0	0	0	0	0	0	0	0	0	0	0	0	0	0	0	0	0	1	0	0	0	0	0	0	0	0	1	0	0	0	0	0	0	0	0	0	0	1
TCGA-13-1512-01	0	0	0	0	0	0	0	0	0	0	0	0	0	0	0	0	0	0	0	0	0	0	0	0	1	0	0	0	0	0	0	0	0	1	0	0	0	0	0	0	0	0	0	0	1
TCGA-13-1817-01	0	0	0	0	0	0	0	0	0	0	0	0	0	0	0	0	0	0	0	0	0	0	0	0	1	0	0	0	0	0	0	0	0	1	0	0	0	0	0	0	0	0	0	0	1
TCGA-13-1819-01	0	0	0	0	0	0	0	0	0	0	0	0	0	0	0	0	0	0	0	0	0	0	0	0	1	0	0	0	0	0	0	0	0	1	0	0	0	0	0	0	0	0	0	0	1
TCGA-13-2071-01	0	0	0	0	0	0	0	0	0	0	0	0	0	0	0	0	0	0	0	0	0	0	0	0	1	0	0	0	0	0	0	0	0	1	0	0	0	0	0	0	0	0	0	0	1
TCGA-13-A5FT-01	0	0	0	0	0	0	0	0	0	0	0	0	0	0	0	0	0	0	0	0	0	0	0	0	1	0	0	0	0	0	0	0	0	1	0	0	0	0	0	0	0	0	0	0	1
TCGA-14-0736-02	1	0	0	0	0	0	0	0	0	0	0	0	0	0	0	0	0	0	0	0	0	0	0	0	1	0	0	0	0	0	0	0	0	0	1	0	0	0	0	0	0	0	0	0	1
TCGA-14-0781-01	1	0	0	0	0	0	0	0	0	0	0	0	0	0	0	0	0	0	0	0	0	0	0	0	1	0	0	0	0	0	0	0	0	0	1	0	0	0	0	0	0	0	0	0	1
TCGA-14-0786-01	1	0	0	0	0	0	0	0	0	0	0	0	0	0	0	0	0	0	0	0	0	0	0	0	1	0	0	0	0	0	0	0	0	0	1	0	0	0	0	0	0	0	0	0	1
TCGA-14-0787-01	1	0	0	0	0	0	0	0	0	0	0	0	0	0	0	0	0	0	0	0	0	0	0	0	1	0	0	0	0	0	0	0	0	0	1	0	0	0	0	0	0	0	0	0	1
TCGA-14-0789-01	1	0	0	0	0	0	0	0	0	0	0	0	0	0	0	0	0	0	0	0	0	0	0	0	1	0	0	0	0	0	0	0	0	0	1	0	0	0	0	0	0	0	0	0	1
TCGA-14-0790-01	1	0	0	0	0	0	0	0	0	0	0	0	0	0	0	0	0	0	0	0	0	0	0	0	1	0	0	0	0	0	0	0	0	0	1	0	0	0	0	0	0	0	0	0	1
TCGA-14-0812-01	1	0	0	0	0	0	0	0	0	0	0	0	0	0	0	0	0	0	0	0	0	0	0	0	1	0	0	0	0	0	0	0	0	0	1	0	0	0	0	0	0	0	0	0	1
TCGA-14-0813-01	1	0	0	0	0	0	0	0	0	0	0	0	0	0	0	0	0	0	0	0	0	0	0	0	1	0	0	0	0	0	0	0	0	0	1	0	0	0	0	0	0	0	0	0	1
TCGA-14-0817-01	1	0	0	0	0	0	0	0	0	0	0	0	0	0	0	0	0	0	0	0	0	0	0	0	1	0	0	0	0	0	0	0	0	0	1	0	0	0	0	0	0	0	0	0	1
TCGA-14-0862-01	1	0	0	0	0	0	0	0	0	0	0	0	0	0	0	0	0	0	0	0	0	0	0	0	1	0	0	0	0	0	0	0	0	0	1	0	0	0	0	0	0	0	0	0	1
TCGA-14-0866-01	1	0	0	0	0	0	0	0	0	0	0	0	0	0	0	0	0	0	0	0	0	0	0	0	1	0	0	0	0	0	0	0	0	0	1	0	0	0	0	0	0	0	0	0	1
TCGA-14-0867-01	1	0	0	0	0	0	0	0	0	0	0	0	0	0	0	0	0	0	0	0	0	0	0	0	1	0	0	0	0	0	0	0	0	0	1	0	0	0	0	0	0	0	0	0	1
TCGA-14-1034-02	1	0	0	0	0	0	0	0	0	0	0	0	0	0	0	0	0	0	0	0	0	0	0	0	1	0	0	0	0	0	0	0	0	0	1	0	0	0	0	0	0	0	0	0	1
TCGA-14-1037-01	1	0	0	0	0	0	0	0	0	0	0	0	0	0	0	0	0	0	0	0	0	0	0	0	1	0	0	0	0	0	0	0	0	0	1	0	0	0	0	0	0	0	0	0	1
TCGA-14-1043-01	1	0	0	0	0	0	0	0	0	0	0	0	0	0	0	0	0	0	0	0	0	0	0	0	1	0	0	0	0	0	0	0	0	0	1	0	0	0	0	0	0	0	0	0	1
TCGA-14-1395-01	1	0	0	0	0	0	0	0	0	0	0	0	0	0	0	0	0	0	0	0	0	0	0	0	1	0	0	0	0	0	0	0	0	0	1	0	0	0	0	0	0	0	0	0	1
TCGA-14-1396-01	1	0	0	0	0	0	0	0	0	0	0	0	0	0	0	0	0	0	0	0	0	0	0	0	1	0	0	0	0	0	0	0	0	0	1	0	0	0	0	0	0	0	0	0	1
TCGA-14-1401-01	1	0	0	0	0	0	0	0	0	0	0	0	0	0	0	0	0	0	0	0	0	0	0	0	1	0	0	0	0	0	0	0	0	0	1	0	0	0	0	0	0	0	0	0	1
TCGA-14-1402-01	1	0	0	0	0	0	0	0	0	0	0	0	0	0	0	0	0	0	0	0	0	0	0	0	1	0	0	0	0	0	0	0	0	0	1	0	0	0	0	0	0	0	0	0	1
TCGA-14-1450-01	1	0	0	0	0	0	0	0	0	0	0	0	0	0	0	0	0	0	0	0	0	0	0	0	1	0	0	0	0	0	0	0	0	0	1	0	0	0	0	0	0	0	0	0	1
TCGA-14-1451-01	1	0	0	0	0	0	0	0	0	0	0	0	0	0	0	0	0	0	0	0	0	0	0	0	1	0	0	0	0	0	0	0	0	0	1	0	0	0	0	0	0	0	0	0	1
TCGA-14-1452-01	1	0	0	0	0	0	0	0	0	0	0	0	0	0	0	0	0	0	0	0	0	0	0	0	1	0	0	0	0	0	0	0	0	0	1	0	0	0	0	0	0	0	0	0	1
TCGA-14-1453-01	1	0	0	0	0	0	0	0	0	0	0	0	0	0	0	0	0	0	0	0	0	0	0	0	1	0	0	0	0	0	0	0	0	0	1	0	0	0	0	0	0	0	0	0	1
TCGA-14-1455-01	1	0	0	0	0	0	0	0	0	0	0	0	0	0	0	0	0	0	0	0	0	0	0	0	1	0	0	0	0	0	0	0	0	0	1	0	0	0	0	0	0	0	0	0	1
TCGA-14-1456-01	1	0	0	0	0	0	0	0	0	0	0	0	0	0	0	0	0	0	0	0	0	0	0	0	1	0	0	0	0	0	0	0	0	0	1	0	0	0	0	0	0	0	0	0	1
TCGA-14-1458-01	1	0	0	0	0	0	0	0	0	0	0	0	0	0	0	0	0	0	0	0	0	0	0	0	1	0	0	0	0	0	0	0	0	0	1	0	0	0	0	0	0	0	0	0	1
TCGA-14-1459-01	1	0	0	0	0	0	0	0	0	0	0	0	0	0	0	0	0	0	0	0	0	0	0	0	1	0	0	0	0	0	0	0	0	0	1	0	0	0	0	0	0	0	0	0	1
TCGA-14-1794-01	1	0	0	0	0	0	0	0	0	0	0	0	0	0	0	0	0	0	0	0	0	0	0	0	1	0	0	0	0	0	0	0	0	0	1	0	0	0	0	0	0	0	0	0	1
TCGA-14-1795-01	1	0	0	0	0	0	0	0	0	0	0	0	0	0	0	0	0	0	0	0	0	0	0	0	1	0	0	0	0	0	0	0	0	0	1	0	0	0	0	0	0	0	0	0	1
TCGA-14-1821-01	1	0	0	0	0	0	0	0	0	0	0	0	0	0	0	0	0	0	0	0	0	0	0	0	1	0	0	0	0	0	0	0	0	0	1	0	0	0	0	0	0	0	0	0	1
TCGA-14-1825-01	1	0	0	0	0	0	0	0	0	0	0	0	0	0	0	0	0	0	0	0	0	0	0	0	1	0	0	0	0	0	0	0	0	0	1	0	0	0	0	0	0	0	0	0	1
TCGA-14-1827-01	1	0	0	0	0	0	0	0	0	0	0	0	0	0	0	0	0	0	0	0	0	0	0	0	1	0	0	0	0	0	0	0	0	0	1	0	0	0	0	0	0	0	0	0	1
TCGA-14-1829-01	1	0	0	0	0	0	0	0	0	0	0	0	0	0	0	0	0	0	0	0	0	0	0	0	1	0	0	0	0	0	0	0	0	0	1	0	0	0	0	0	0	0	0	0	1
TCGA-14-2554-01	1	0	0	0	0	0	0	0	0	0	0	0	0	0	0	0	0	0	0	0	0	0	0	0	1	0	0	0	0	0	0	0	0	0	1	0	0	0	0	0	0	0	0	0	1
TCGA-14-2555-01	1	0	0	0	0	0	0	0	0	0	0	0	0	0	0	0	0	0	0	0	0	0	0	0	1	0	0	0	0	0	0	0	0	0	1	0	0	0	0	0	0	0	0	0	1
TCGA-14-4157-01	1	0	0	0	0	0	0	0	0	0	0	0	0	0	0	0	0	0	0	0	0	0	0	0	1	0	0	0	0	0	0	0	0	0	1	0	0	0	0	0	0	0	0	0	1
TCGA-15-0742-01	1	0	0	0	0	0	0	0	0	0	0	0	0	0	0	0	0	0	0	0	0	0	0	0	1	0	0	0	0	0	0	0	0	0	1	0	0	0	0	0	0	0	0	0	1
TCGA-15-1444-01	1	0	0	0	0	0	0	0	0	0	0	0	0	0	0	0	0	0	0	0	0	0	0	0	1	0	0	0	0	0	0	0	0	0	1	0	0	0	0	0	0	0	0	0	1
TCGA-15-1446-01	1	0	0	0	0	0	0	0	0	0	0	0	0	0	0	0	0	0	0	0	0	0	0	0	1	0	0	0	0	0	0	0	0	0	1	0	0	0	0	0	0	0	0	0	1
TCGA-16-0848-01	1	0	0	0	0	0	0	0	0	0	0	0	0	0	0	0	0	0	0	0	0	0	0	0	1	0	0	0	0	0	0	0	0	0	1	0	0	0	0	0	0	0	0	0	1
TCGA-16-0849-01	1	0	0	0	0	0	0	0	0	0	0	0	0	0	0	0	0	0	0	0	0	0	0	0	1	0	0	0	0	0	0	0	0	0	1	0	0	0	0	0	0	0	0	0	1
TCGA-16-0861-01	1	0	0	0	0	0	0	0	0	0	0	0	0	0	0	0	0	0	0	0	0	0	0	0	1	0	0	0	0	0	0	0	0	0	1	0	0	0	0	0	0	0	0	0	1
TCGA-16-1047-01	1	0	0	0	0	0	0	0	0	0	0	0	0	0	0	0	0	0	0	0	0	0	0	0	1	0	0	0	0	0	0	0	0	0	1	0	0	0	0	0	0	0	0	0	1
TCGA-16-1048-01	1	0	0	0	0	0	0	0	0	0	0	0	0	0	0	0	0	0	0	0	0	0	0	0	1	0	0	0	0	0	0	0	0	0	1	0	0	0	0	0	0	0	0	0	1
TCGA-16-1055-01	1	0	0	0	0	0	0	0	0	0	0	0	0	0	0	0	0	0	0	0	0	0	0	0	1	0	0	0	0	0	0	0	0	0	1	0	0	0	0	0	0	0	0	0	1
TCGA-16-1056-01	1	0	0	0	0	0	0	0	0	0	0	0	0	0	0	0	0	0	0	0	0	0	0	0	1	0	0	0	0	0	0	0	0	0	1	0	0	0	0	0	0	0	0	0	1
TCGA-16-1060-01	1	0	0	0	0	0	0	0	0	0	0	0	0	0	0	0	0	0	0	0	0	0	0	0	1	0	0	0	0	0	0	0	0	0	1	0	0	0	0	0	0	0	0	0	1
TCGA-16-1062-01	1	0	0	0	0	0	0	0	0	0	0	0	0	0	0	0	0	0	0	0	0	0	0	0	1	0	0	0	0	0	0	0	0	0	1	0	0	0	0	0	0	0	0	0	1
TCGA-16-1063-01	1	0	0	0	0	0	0	0	0	0	0	0	0	0	0	0	0	0	0	0	0	0	0	0	1	0	0	0	0	0	0	0	0	0	1	0	0	0	0	0	0	0	0	0	1
TCGA-16-1460-01	1	0	0	0	0	0	0	0	0	0	0	0	0	0	0	0	0	0	0	0	0	0	0	0	1	0	0	0	0	0	0	0	0	0	1	0	0	0	0	0	0	0	0	0	1
TCGA-18-3406-01	0	0	0	0	0	0	0	0	0	0	0	0	0	0	0	0	0	0	0	0	1	0	0	1	1	0	0	0	0	0	0	0	0	0	0	0	0	0	0	0	0	0	0	0	1
TCGA-18-3408-01	0	0	0	0	0	0	0	0	0	0	0	0	0	0	0	0	0	0	0	0	1	0	0	1	1	0	0	0	0	0	0	0	0	0	0	0	0	0	0	0	0	0	0	0	1
TCGA-18-3414-01	0	0	0	0	0	0	0	0	0	0	0	0	0	0	0	0	0	0	0	0	1	0	0	1	1	0	0	0	0	0	0	0	0	0	0	0	0	0	0	0	0	0	0	0	1
TCGA-18-3419-01	0	0	0	0	0	0	0	0	0	0	0	0	0	0	0	0	0	0	0	0	1	0	0	1	1	0	0	0	0	0	0	0	0	0	0	0	0	0	0	0	0	0	0	0	1
TCGA-18-4086-01	0	0	0	0	0	0	0	0	0	0	0	0	0	0	0	0	0	0	0	0	1	0	0	1	1	0	0	0	0	0	0	0	0	0	0	0	0	0	0	0	0	0	0	0	1
TCGA-18-4721-01	0	0	0	0	0	0	0	0	0	0	0	0	0	0	0	0	0	0	0	0	1	0	0	1	1	0	0	0	0	0	0	0	0	0	0	0	0	0	0	0	0	0	0	0	1
TCGA-18-5592-01	0	0	0	0	0	0	0	0	0	0	0	0	0	0	0	0	0	0	0	0	1	0	0	1	1	0	0	0	0	0	0	0	0	0	0	0	0	0	0	0	0	0	0	0	1
TCGA-19-0955-01	1	0	0	0	0	0	0	0	0	0	0	0	0	0	0	0	0	0	0	0	0	0	0	0	1	0	0	0	0	0	0	0	0	0	1	0	0	0	0	0	0	0	0	0	1
TCGA-19-0957-01	1	0	0	0	0	0	0	0	0	0	0	0	0	0	0	0	0	0	0	0	0	0	0	0	1	0	0	0	0	0	0	0	0	0	1	0	0	0	0	0	0	0	0	0	1
TCGA-19-0960-01	1	0	0	0	0	0	0	0	0	0	0	0	0	0	0	0	0	0	0	0	0	0	0	0	1	0	0	0	0	0	0	0	0	0	1	0	0	0	0	0	0	0	0	0	1
TCGA-19-0962-01	1	0	0	0	0	0	0	0	0	0	0	0	0	0	0	0	0	0	0	0	0	0	0	0	1	0	0	0	0	0	0	0	0	0	1	0	0	0	0	0	0	0	0	0	1
TCGA-19-0963-01	1	0	0	0	0	0	0	0	0	0	0	0	0	0	0	0	0	0	0	0	0	0	0	0	1	0	0	0	0	0	0	0	0	0	1	0	0	0	0	0	0	0	0	0	1
TCGA-19-0964-01	1	0	0	0	0	0	0	0	0	0	0	0	0	0	0	0	0	0	0	0	0	0	0	0	1	0	0	0	0	0	0	0	0	0	1	0	0	0	0	0	0	0	0	0	1
TCGA-19-1385-01	1	0	0	0	0	0	0	0	0	0	0	0	0	0	0	0	0	0	0	0	0	0	0	0	1	0	0	0	0	0	0	0	0	0	1	0	0	0	0	0	0	0	0	0	1
TCGA-19-1386-01	1	0	0	0	0	0	0	0	0	0	0	0	0	0	0	0	0	0	0	0	0	0	0	0	1	0	0	0	0	0	0	0	0	0	1	0	0	0	0	0	0	0	0	0	1
TCGA-19-1387-01	1	0	0	0	0	0	0	0	0	0	0	0	0	0	0	0	0	0	0	0	0	0	0	0	1	0	0	0	0	0	0	0	0	0	1	0	0	0	0	0	0	0	0	0	1
TCGA-19-1389-01	1	0	0	0	0	0	0	0	0	0	0	0	0	0	0	0	0	0	0	0	0	0	0	0	1	0	0	0	0	0	0	0	0	0	1	0	0	0	0	0	0	0	0	0	1
TCGA-19-1786-01	1	0	0	0	0	0	0	0	0	0	0	0	0	0	0	0	0	0	0	0	0	0	0	0	1	0	0	0	0	0	0	0	0	0	1	0	0	0	0	0	0	0	0	0	1
TCGA-19-1787-01	1	0	0	0	0	0	0	0	0	0	0	0	0	0	0	0	0	0	0	0	0	0	0	0	1	0	0	0	0	0	0	0	0	0	1	0	0	0	0	0	0	0	0	0	1
TCGA-19-1789-01	1	0	0	0	0	0	0	0	0	0	0	0	0	0	0	0	0	0	0	0	0	0	0	0	1	0	0	0	0	0	0	0	0	0	1	0	0	0	0	0	0	0	0	0	1
TCGA-19-1791-01	1	0	0	0	0	0	0	0	0	0	0	0	0	0	0	0	0	0	0	0	0	0	0	0	1	0	0	0	0	0	0	0	0	0	1	0	0	0	0	0	0	0	0	0	1
TCGA-19-2619-01	1	0	0	0	0	0	0	0	0	0	0	0	0	0	0	0	0	0	0	0	0	0	0	0	1	0	0	0	0	0	0	0	0	0	1	0	0	0	0	0	0	0	0	0	1
TCGA-19-2620-01	1	0	0	0	0	0	0	0	0	0	0	0	0	0	0	0	0	0	0	0	0	0	0	0	1	0	0	0	0	0	0	0	0	0	1	0	0	0	0	0	0	0	0	0	1
TCGA-19-2621-01	1	0	0	0	0	0	0	0	0	0	0	0	0	0	0	0	0	0	0	0	0	0	0	0	1	0	0	0	0	0	0	0	0	0	1	0	0	0	0	0	0	0	0	0	1
TCGA-19-2623-01	1	0	0	0	0	0	0	0	0	0	0	0	0	0	0	0	0	0	0	0	0	0	0	0	1	0	0	0	0	0	0	0	0	0	1	0	0	0	0	0	0	0	0	0	1
TCGA-19-2624-01	1	0	0	0	0	0	0	0	0	0	0	0	0	0	0	0	0	0	0	0	0	0	0	0	1	0	0	0	0	0	0	0	0	0	1	0	0	0	0	0	0	0	0	0	1
TCGA-19-2625-01	1	0	0	0	0	0	0	0	0	0	0	0	0	0	0	0	0	0	0	0	0	0	0	0	1	0	0	0	0	0	0	0	0	0	1	0	0	0	0	0	0	0	0	0	1
TCGA-19-2631-01	1	0	0	0	0	0	0	0	0	0	0	0	0	0	0	0	0	0	0	0	0	0	0	0	1	0	0	0	0	0	0	0	0	0	1	0	0	0	0	0	0	0	0	0	1
TCGA-19-5947-01	1	0	0	0	0	0	0	0	0	0	0	0	0	0	0	0	0	0	0	0	0	0	0	0	1	0	0	0	0	0	0	0	0	0	1	0	0	0	0	0	0	0	0	0	1
TCGA-19-5950-01	1	0	0	0	0	0	0	0	0	0	0	0	0	0	0	0	0	0	0	0	0	0	0	0	1	0	0	0	0	0	0	0	0	0	1	0	0	0	0	0	0	0	0	0	1
TCGA-19-5951-01	1	0	0	0	0	0	0	0	0	0	0	0	0	0	0	0	0	0	0	0	0	0	0	0	1	0	0	0	0	0	0	0	0	0	1	0	0	0	0	0	0	0	0	0	1
TCGA-19-5952-01	1	0	0	0	0	0	0	0	0	0	0	0	0	0	0	0	0	0	0	0	0	0	0	0	1	0	0	0	0	0	0	0	0	0	1	0	0	0	0	0	0	0	0	0	1
TCGA-19-5953-01	1	0	0	0	0	0	0	0	0	0	0	0	0	0	0	0	0	0	0	0	0	0	0	0	1	0	0	0	0	0	0	0	0	0	1	0	0	0	0	0	0	0	0	0	1
TCGA-19-5954-01	1	0	0	0	0	0	0	0	0	0	0	0	0	0	0	0	0	0	0	0	0	0	0	0	1	0	0	0	0	0	0	0	0	0	1	0	0	0	0	0	0	0	0	0	1
TCGA-19-5955-01	1	0	0	0	0	0	0	0	0	0	0	0	0	0	0	0	0	0	0	0	0	0	0	0	1	0	0	0	0	0	0	0	0	0	1	0	0	0	0	0	0	0	0	0	1
TCGA-19-5958-01	1	0	0	0	0	0	0	0	0	0	0	0	0	0	0	0	0	0	0	0	0	0	0	0	1	0	0	0	0	0	0	0	0	0	1	0	0	0	0	0	0	0	0	0	1
TCGA-19-5959-01	1	0	0	0	0	0	0	0	0	0	0	0	0	0	0	0	0	0	0	0	0	0	0	0	1	0	0	0	0	0	0	0	0	0	1	0	0	0	0	0	0	0	0	0	1
TCGA-19-5960-01	1	0	0	0	0	0	0	0	0	0	0	0	0	0	0	0	0	0	0	0	0	0	0	0	1	0	0	0	0	0	0	0	0	0	1	0	0	0	0	0	0	0	0	0	1
TCGA-19-A60I-01	1	0	0	0	0	0	0	0	0	0	0	0	0	0	0	0	0	0	0	0	0	0	0	0	1	0	0	0	0	0	0	0	0	0	1	0	0	0	0	0	0	0	0	0	1
TCGA-19-A6J5-01	1	0	0	0	0	0	0	0	0	0	0	0	0	0	0	0	0	0	0	0	0	0	0	0	1	0	0	0	0	0	0	0	0	0	1	0	0	0	0	0	0	0	0	0	1
TCGA-20-0987-01	0	0	0	0	0	0	0	0	0	0	0	0	0	0	0	0	0	0	0	0	0	0	0	0	1	0	0	0	0	0	0	0	0	1	0	0	0	0	0	0	0	0	0	0	1
TCGA-20-1682-01	0	0	0	0	0	0	0	0	0	0	0	0	0	0	0	0	0	0	0	0	0	0	0	0	1	0	0	0	0	0	0	0	0	1	0	0	0	0	0	0	0	0	0	0	1
TCGA-21-1080-01	0	0	0	0	0	0	0	0	0	0	0	0	0	0	0	0	0	0	0	0	1	0	0	1	1	0	0	0	0	0	0	0	0	0	0	0	0	0	0	0	0	0	0	0	1
TCGA-21-1082-01	0	0	0	0	0	0	0	0	0	0	0	0	0	0	0	0	0	0	0	0	1	0	0	1	1	0	0	0	0	0	0	0	0	0	0	0	0	0	0	0	0	0	0	0	1
TCGA-21-5782-01	0	0	0	0	0	0	0	0	0	0	0	0	0	0	0	0	0	0	0	0	1	0	0	1	1	0	0	0	0	0	0	0	0	0	0	0	0	0	0	0	0	0	0	0	1
TCGA-22-0940-01	0	0	0	0	0	0	0	0	0	0	0	0	0	0	0	0	0	0	0	0	1	0	0	1	1	0	0	0	0	0	0	0	0	0	0	0	0	0	0	0	0	0	0	0	1
TCGA-22-0944-01	0	0	0	0	0	0	0	0	0	0	0	0	0	0	0	0	0	0	0	0	1	0	0	1	1	0	0	0	0	0	0	0	0	0	0	0	0	0	0	0	0	0	0	0	1
TCGA-22-1000-01	0	0	0	0	0	0	0	0	0	0	0	0	0	0	0	0	0	0	0	0	1	0	0	1	1	0	0	0	0	0	0	0	0	0	0	0	0	0	0	0	0	0	0	0	1
TCGA-22-1002-01	0	0	0	0	0	0	0	0	0	0	0	0	0	0	0	0	0	0	0	0	1	0	0	1	1	0	0	0	0	0	0	0	0	0	0	0	0	0	0	0	0	0	0	0	1
TCGA-22-1005-01	0	0	0	0	0	0	0	0	0	0	0	0	0	0	0	0	0	0	0	0	1	0	0	1	1	0	0	0	0	0	0	0	0	0	0	0	0	0	0	0	0	0	0	0	1
TCGA-22-1011-01	0	0	0	0	0	0	0	0	0	0	0	0	0	0	0	0	0	0	0	0	1	0	0	1	1	0	0	0	0	0	0	0	0	0	0	0	0	0	0	0	0	0	0	0	1
TCGA-22-4595-01	0	0	0	0	0	0	0	0	0	0	0	0	0	0	0	0	0	0	0	0	1	0	0	1	1	0	0	0	0	0	0	0	0	0	0	0	0	0	0	0	0	0	0	0	1
TCGA-22-4596-01	0	0	0	0	0	0	0	0	0	0	0	0	0	0	0	0	0	0	0	0	1	0	0	1	1	0	0	0	0	0	0	0	0	0	0	0	0	0	0	0	0	0	0	0	1
TCGA-22-4601-01	0	0	0	0	0	0	0	0	0	0	0	0	0	0	0	0	0	0	0	0	1	0	0	1	1	0	0	0	0	0	0	0	0	0	0	0	0	0	0	0	0	0	0	0	1
TCGA-22-4607-01	0	0	0	0	0	0	0	0	0	0	0	0	0	0	0	0	0	0	0	0	1	0	0	1	1	0	0	0	0	0	0	0	0	0	0	0	0	0	0	0	0	0	0	0	1
TCGA-22-4609-01	0	0	0	0	0	0	0	0	0	0	0	0	0	0	0	0	0	0	0	0	1	0	0	1	1	0	0	0	0	0	0	0	0	0	0	0	0	0	0	0	0	0	0	0	1
TCGA-22-4613-01	0	0	0	0	0	0	0	0	0	0	0	0	0	0	0	0	0	0	0	0	1	0	0	1	1	0	0	0	0	0	0	0	0	0	0	0	0	0	0	0	0	0	0	0	1
TCGA-22-5472-01	0	0	0	0	0	0	0	0	0	0	0	0	0	0	0	0	0	0	0	0	1	0	0	1	1	0	0	0	0	0	0	0	0	0	0	0	0	0	0	0	0	0	0	0	1
TCGA-22-5474-01	0	0	0	0	0	0	0	0	0	0	0	0	0	0	0	0	0	0	0	0	1	0	0	1	1	0	0	0	0	0	0	0	0	0	0	0	0	0	0	0	0	0	0	0	1
TCGA-22-5480-01	0	0	0	0	0	0	0	0	0	0	0	0	0	0	0	0	0	0	0	0	1	0	0	1	1	0	0	0	0	0	0	0	0	0	0	0	0	0	0	0	0	0	0	0	1
TCGA-22-5485-01	0	0	0	0	0	0	0	0	0	0	0	0	0	0	0	0	0	0	0	0	1	0	0	1	1	0	0	0	0	0	0	0	0	0	0	0	0	0	0	0	0	0	0	0	1
TCGA-22-5489-01	0	0	0	0	0	0	0	0	0	0	0	0	0	0	0	0	0	0	0	0	1	0	0	1	1	0	0	0	0	0	0	0	0	0	0	0	0	0	0	0	0	0	0	0	1
TCGA-22-5492-01	0	0	0	0	0	0	0	0	0	0	0	0	0	0	0	0	0	0	0	0	1	0	0	1	1	0	0	0	0	0	0	0	0	0	0	0	0	0	0	0	0	0	0	0	1
TCGA-23-1021-01	0	0	0	0	0	0	0	0	0	0	0	0	0	0	0	0	0	0	0	0	0	0	0	0	1	0	0	0	0	0	0	0	0	1	0	0	0	0	0	0	0	0	0	0	1
TCGA-23-1023-01	0	0	0	0	0	0	0	0	0	0	0	0	0	0	0	0	0	0	0	0	0	0	0	0	1	0	0	0	0	0	0	0	0	1	0	0	0	0	0	0	0	0	0	0	1
TCGA-23-1026-01	0	0	0	0	0	0	0	0	0	0	0	0	0	0	0	0	0	0	0	0	0	0	0	0	1	0	0	0	0	0	0	0	0	1	0	0	0	0	0	0	0	0	0	0	1
TCGA-23-1027-01	0	0	0	0	0	0	0	0	0	0	0	0	0	0	0	0	0	0	0	0	0	0	0	0	1	0	0	0	0	0	0	0	0	1	0	0	0	0	0	0	0	0	0	0	1
TCGA-23-1028-01	0	0	0	0	0	0	0	0	0	0	0	0	0	0	0	0	0	0	0	0	0	0	0	0	1	0	0	0	0	0	0	0	0	1	0	0	0	0	0	0	0	0	0	0	1
TCGA-23-1029-01	0	0	0	0	0	0	0	0	0	0	0	0	0	0	0	0	0	0	0	0	0	0	0	0	1	0	0	0	0	0	0	0	0	1	0	0	0	0	0	0	0	0	0	0	1
TCGA-23-1113-01	0	0	0	0	0	0	0	0	0	0	0	0	0	0	0	0	0	0	0	0	0	0	0	0	1	0	0	0	0	0	0	0	0	1	0	0	0	0	0	0	0	0	0	0	1
TCGA-23-1118-01	0	0	0	0	0	0	0	0	0	0	0	0	0	0	0	0	0	0	0	0	0	0	0	0	1	0	0	0	0	0	0	0	0	1	0	0	0	0	0	0	0	0	0	0	1
TCGA-23-1120-01	0	0	0	0	0	0	0	0	0	0	0	0	0	0	0	0	0	0	0	0	0	0	0	0	1	0	0	0	0	0	0	0	0	1	0	0	0	0	0	0	0	0	0	0	1
TCGA-23-2078-01	0	0	0	0	0	0	0	0	0	0	0	0	0	0	0	0	0	0	0	0	0	0	0	0	1	0	0	0	0	0	0	0	0	1	0	0	0	0	0	0	0	0	0	0	1
TCGA-23-2081-01	0	0	0	0	0	0	0	0	0	0	0	0	0	0	0	0	0	0	0	0	0	0	0	0	1	0	0	0	0	0	0	0	0	1	0	0	0	0	0	0	0	0	0	0	1
TCGA-23-2641-01	0	0	0	0	0	0	0	0	0	0	0	0	0	0	0	0	0	0	0	0	0	0	0	0	1	0	0	0	0	0	0	0	0	1	0	0	0	0	0	0	0	0	0	0	1
TCGA-24-0966-01	0	0	0	0	0	0	0	0	0	0	0	0	0	0	0	0	0	0	0	0	0	0	0	0	1	0	0	0	0	0	0	0	0	1	0	0	0	0	0	0	0	0	0	0	1
TCGA-24-0970-01	0	0	0	0	0	0	0	0	0	0	0	0	0	0	0	0	0	0	0	0	0	0	0	0	1	0	0	0	0	0	0	0	0	1	0	0	0	0	0	0	0	0	0	0	1
TCGA-24-0975-01	0	0	0	0	0	0	0	0	0	0	0	0	0	0	0	0	0	0	0	0	0	0	0	0	1	0	0	0	0	0	0	0	0	1	0	0	0	0	0	0	0	0	0	0	1
TCGA-24-0980-01	0	0	0	0	0	0	0	0	0	0	0	0	0	0	0	0	0	0	0	0	0	0	0	0	1	0	0	0	0	0	0	0	0	1	0	0	0	0	0	0	0	0	0	0	1
TCGA-24-1103-01	0	0	0	0	0	0	0	0	0	0	0	0	0	0	0	0	0	0	0	0	0	0	0	0	1	0	0	0	0	0	0	0	0	1	0	0	0	0	0	0	0	0	0	0	1
TCGA-24-1104-01	0	0	0	0	0	0	0	0	0	0	0	0	0	0	0	0	0	0	0	0	0	0	0	0	1	0	0	0	0	0	0	0	0	1	0	0	0	0	0	0	0	0	0	0	1
TCGA-24-1413-01	0	0	0	0	0	0	0	0	0	0	0	0	0	0	0	0	0	0	0	0	0	0	0	0	1	0	0	0	0	0	0	0	0	1	0	0	0	0	0	0	0	0	0	0	1
TCGA-24-1419-01	0	0	0	0	0	0	0	0	0	0	0	0	0	0	0	0	0	0	0	0	0	0	0	0	1	0	0	0	0	0	0	0	0	1	0	0	0	0	0	0	0	0	0	0	1
TCGA-24-1423-01	0	0	0	0	0	0	0	0	0	0	0	0	0	0	0	0	0	0	0	0	0	0	0	0	1	0	0	0	0	0	0	0	0	1	0	0	0	0	0	0	0	0	0	0	1
TCGA-24-1425-01	0	0	0	0	0	0	0	0	0	0	0	0	0	0	0	0	0	0	0	0	0	0	0	0	1	0	0	0	0	0	0	0	0	1	0	0	0	0	0	0	0	0	0	0	1
TCGA-24-1426-01	0	0	0	0	0	0	0	0	0	0	0	0	0	0	0	0	0	0	0	0	0	0	0	0	1	0	0	0	0	0	0	0	0	1	0	0	0	0	0	0	0	0	0	0	1
TCGA-24-1430-01	0	0	0	0	0	0	0	0	0	0	0	0	0	0	0	0	0	0	0	0	0	0	0	0	1	0	0	0	0	0	0	0	0	1	0	0	0	0	0	0	0	0	0	0	1
TCGA-24-1463-01	0	0	0	0	0	0	0	0	0	0	0	0	0	0	0	0	0	0	0	0	0	0	0	0	1	0	0	0	0	0	0	0	0	1	0	0	0	0	0	0	0	0	0	0	1
TCGA-24-1464-01	0	0	0	0	0	0	0	0	0	0	0	0	0	0	0	0	0	0	0	0	0	0	0	0	1	0	0	0	0	0	0	0	0	1	0	0	0	0	0	0	0	0	0	0	1
TCGA-24-1470-01	0	0	0	0	0	0	0	0	0	0	0	0	0	0	0	0	0	0	0	0	0	0	0	0	1	0	0	0	0	0	0	0	0	1	0	0	0	0	0	0	0	0	0	0	1
TCGA-24-1546-01	0	0	0	0	0	0	0	0	0	0	0	0	0	0	0	0	0	0	0	0	0	0	0	0	1	0	0	0	0	0	0	0	0	1	0	0	0	0	0	0	0	0	0	0	1
TCGA-24-1550-01	0	0	0	0	0	0	0	0	0	0	0	0	0	0	0	0	0	0	0	0	0	0	0	0	1	0	0	0	0	0	0	0	0	1	0	0	0	0	0	0	0	0	0	0	1
TCGA-24-1551-01	0	0	0	0	0	0	0	0	0	0	0	0	0	0	0	0	0	0	0	0	0	0	0	0	1	0	0	0	0	0	0	0	0	1	0	0	0	0	0	0	0	0	0	0	1
TCGA-24-1555-01	0	0	0	0	0	0	0	0	0	0	0	0	0	0	0	0	0	0	0	0	0	0	0	0	1	0	0	0	0	0	0	0	0	1	0	0	0	0	0	0	0	0	0	0	1
TCGA-24-1562-01	0	0	0	0	0	0	0	0	0	0	0	0	0	0	0	0	0	0	0	0	0	0	0	0	1	0	0	0	0	0	0	0	0	1	0	0	0	0	0	0	0	0	0	0	1
TCGA-24-1563-01	0	0	0	0	0	0	0	0	0	0	0	0	0	0	0	0	0	0	0	0	0	0	0	0	1	0	0	0	0	0	0	0	0	1	0	0	0	0	0	0	0	0	0	0	1
TCGA-24-1565-01	0	0	0	0	0	0	0	0	0	0	0	0	0	0	0	0	0	0	0	0	0	0	0	0	1	0	0	0	0	0	0	0	0	1	0	0	0	0	0	0	0	0	0	0	1
TCGA-24-1567-01	0	0	0	0	0	0	0	0	0	0	0	0	0	0	0	0	0	0	0	0	0	0	0	0	1	0	0	0	0	0	0	0	0	1	0	0	0	0	0	0	0	0	0	0	1
TCGA-24-1603-01	0	0	0	0	0	0	0	0	0	0	0	0	0	0	0	0	0	0	0	0	0	0	0	0	1	0	0	0	0	0	0	0	0	1	0	0	0	0	0	0	0	0	0	0	1
TCGA-24-1846-01	0	0	0	0	0	0	0	0	0	0	0	0	0	0	0	0	0	0	0	0	0	0	0	0	1	0	0	0	0	0	0	0	0	1	0	0	0	0	0	0	0	0	0	0	1
TCGA-24-1849-01	0	0	0	0	0	0	0	0	0	0	0	0	0	0	0	0	0	0	0	0	0	0	0	0	1	0	0	0	0	0	0	0	0	1	0	0	0	0	0	0	0	0	0	0	1
TCGA-24-1927-01	0	0	0	0	0	0	0	0	0	0	0	0	0	0	0	0	0	0	0	0	0	0	0	0	1	0	0	0	0	0	0	0	0	1	0	0	0	0	0	0	0	0	0	0	1
TCGA-24-2023-01	0	0	0	0	0	0	0	0	0	0	0	0	0	0	0	0	0	0	0	0	0	0	0	0	1	0	0	0	0	0	0	0	0	1	0	0	0	0	0	0	0	0	0	0	1
TCGA-24-2024-01	0	0	0	0	0	0	0	0	0	0	0	0	0	0	0	0	0	0	0	0	0	0	0	0	1	0	0	0	0	0	0	0	0	1	0	0	0	0	0	0	0	0	0	0	1
TCGA-24-2027-01	0	0	0	0	0	0	0	0	0	0	0	0	0	0	0	0	0	0	0	0	0	0	0	0	1	0	0	0	0	0	0	0	0	1	0	0	0	0	0	0	0	0	0	0	1
TCGA-24-2029-01	0	0	0	0	0	0	0	0	0	0	0	0	0	0	0	0	0	0	0	0	0	0	0	0	1	0	0	0	0	0	0	0	0	1	0	0	0	0	0	0	0	0	0	0	1
TCGA-24-2035-01	0	0	0	0	0	0	0	0	0	0	0	0	0	0	0	0	0	0	0	0	0	0	0	0	1	0	0	0	0	0	0	0	0	1	0	0	0	0	0	0	0	0	0	0	1
TCGA-24-2038-01	0	0	0	0	0	0	0	0	0	0	0	0	0	0	0	0	0	0	0	0	0	0	0	0	1	0	0	0	0	0	0	0	0	1	0	0	0	0	0	0	0	0	0	0	1
TCGA-24-2254-01	0	0	0	0	0	0	0	0	0	0	0	0	0	0	0	0	0	0	0	0	0	0	0	0	1	0	0	0	0	0	0	0	0	1	0	0	0	0	0	0	0	0	0	0	1
TCGA-24-2262-01	0	0	0	0	0	0	0	0	0	0	0	0	0	0	0	0	0	0	0	0	0	0	0	0	1	0	0	0	0	0	0	0	0	1	0	0	0	0	0	0	0	0	0	0	1
TCGA-24-2271-01	0	0	0	0	0	0	0	0	0	0	0	0	0	0	0	0	0	0	0	0	0	0	0	0	1	0	0	0	0	0	0	0	0	1	0	0	0	0	0	0	0	0	0	0	1
TCGA-24-2297-01	0	0	0	0	0	0	0	0	0	0	0	0	0	0	0	0	0	0	0	0	0	0	0	0	1	0	0	0	0	0	0	0	0	1	0	0	0	0	0	0	0	0	0	0	1
TCGA-25-1315-01	0	0	0	0	0	0	0	0	0	0	0	0	0	0	0	0	0	0	0	0	0	0	0	0	1	0	0	0	0	0	0	0	0	1	0	0	0	0	0	0	0	0	0	0	1
TCGA-25-1322-01	0	0	0	0	0	0	0	0	0	0	0	0	0	0	0	0	0	0	0	0	0	0	0	0	1	0	0	0	0	0	0	0	0	1	0	0	0	0	0	0	0	0	0	0	1
TCGA-25-1625-01	0	0	0	0	0	0	0	0	0	0	0	0	0	0	0	0	0	0	0	0	0	0	0	0	1	0	0	0	0	0	0	0	0	1	0	0	0	0	0	0	0	0	0	0	1
TCGA-25-1631-01	0	0	0	0	0	0	0	0	0	0	0	0	0	0	0	0	0	0	0	0	0	0	0	0	1	0	0	0	0	0	0	0	0	1	0	0	0	0	0	0	0	0	0	0	1
TCGA-25-2042-01	0	0	0	0	0	0	0	0	0	0	0	0	0	0	0	0	0	0	0	0	0	0	0	0	1	0	0	0	0	0	0	0	0	1	0	0	0	0	0	0	0	0	0	0	1
TCGA-25-2391-01	0	0	0	0	0	0	0	0	0	0	0	0	0	0	0	0	0	0	0	0	0	0	0	0	1	0	0	0	0	0	0	0	0	1	0	0	0	0	0	0	0	0	0	0	1
TCGA-25-2397-01	0	0	0	0	0	0	0	0	0	0	0	0	0	0	0	0	0	0	0	0	0	0	0	0	1	0	0	0	0	0	0	0	0	1	0	0	0	0	0	0	0	0	0	0	1
TCGA-25-2399-01	0	0	0	0	0	0	0	0	0	0	0	0	0	0	0	0	0	0	0	0	0	0	0	0	1	0	0	0	0	0	0	0	0	1	0	0	0	0	0	0	0	0	0	0	1
TCGA-25-2401-01	0	0	0	0	0	0	0	0	0	0	0	0	0	0	0	0	0	0	0	0	0	0	0	0	1	0	0	0	0	0	0	0	0	1	0	0	0	0	0	0	0	0	0	0	1
TCGA-25-2408-01	0	0	0	0	0	0	0	0	0	0	0	0	0	0	0	0	0	0	0	0	0	0	0	0	1	0	0	0	0	0	0	0	0	1	0	0	0	0	0	0	0	0	0	0	1
TCGA-26-1438-01	1	0	0	0	0	0	0	0	0	0	0	0	0	0	0	0	0	0	0	0	0	0	0	0	1	0	0	0	0	0	0	0	0	0	1	0	0	0	0	0	0	0	0	0	1
TCGA-26-1440-01	1	0	0	0	0	0	0	0	0	0	0	0	0	0	0	0	0	0	0	0	0	0	0	0	1	0	0	0	0	0	0	0	0	0	1	0	0	0	0	0	0	0	0	0	1
TCGA-26-1442-01	1	0	0	0	0	0	0	0	0	0	0	0	0	0	0	0	0	0	0	0	0	0	0	0	1	0	0	0	0	0	0	0	0	0	1	0	0	0	0	0	0	0	0	0	1
TCGA-26-1443-01	1	0	0	0	0	0	0	0	0	0	0	0	0	0	0	0	0	0	0	0	0	0	0	0	1	0	0	0	0	0	0	0	0	0	1	0	0	0	0	0	0	0	0	0	1
TCGA-26-1799-01	1	0	0	0	0	0	0	0	0	0	0	0	0	0	0	0	0	0	0	0	0	0	0	0	1	0	0	0	0	0	0	0	0	0	1	0	0	0	0	0	0	0	0	0	1
TCGA-26-5132-01	1	0	0	0	0	0	0	0	0	0	0	0	0	0	0	0	0	0	0	0	0	0	0	0	1	0	0	0	0	0	0	0	0	0	1	0	0	0	0	0	0	0	0	0	1
TCGA-26-5133-01	1	0	0	0	0	0	0	0	0	0	0	0	0	0	0	0	0	0	0	0	0	0	0	0	1	0	0	0	0	0	0	0	0	0	1	0	0	0	0	0	0	0	0	0	1
TCGA-26-5134-01	1	0	0	0	0	0	0	0	0	0	0	0	0	0	0	0	0	0	0	0	0	0	0	0	1	0	0	0	0	0	0	0	0	0	1	0	0	0	0	0	0	0	0	0	1
TCGA-26-5135-01	1	0	0	0	0	0	0	0	0	0	0	0	0	0	0	0	0	0	0	0	0	0	0	0	1	0	0	0	0	0	0	0	0	0	1	0	0	0	0	0	0	0	0	0	1
TCGA-26-5136-01	1	0	0	0	0	0	0	0	0	0	0	0	0	0	0	0	0	0	0	0	0	0	0	0	1	0	0	0	0	0	0	0	0	0	1	0	0	0	0	0	0	0	0	0	1
TCGA-26-5139-01	1	0	0	0	0	0	0	0	0	0	0	0	0	0	0	0	0	0	0	0	0	0	0	0	1	0	0	0	0	0	0	0	0	0	1	0	0	0	0	0	0	0	0	0	1
TCGA-26-6173-01	1	0	0	0	0	0	0	0	0	0	0	0	0	0	0	0	0	0	0	0	0	0	0	0	1	0	0	0	0	0	0	0	0	0	1	0	0	0	0	0	0	0	0	0	1
TCGA-26-6174-01	1	0	0	0	0	0	0	0	0	0	0	0	0	0	0	0	0	0	0	0	0	0	0	0	1	0	0	0	0	0	0	0	0	0	1	0	0	0	0	0	0	0	0	0	1
TCGA-26-A7UX-01	1	0	0	0	0	0	0	0	0	0	0	0	0	0	0	0	0	0	0	0	0	0	0	0	1	0	0	0	0	0	0	0	0	0	1	0	0	0	0	0	0	0	0	0	1
TCGA-27-1830-01	1	0	0	0	0	0	0	0	0	0	0	0	0	0	0	0	0	0	0	0	0	0	0	0	1	0	0	0	0	0	0	0	0	0	1	0	0	0	0	0	0	0	0	0	1
TCGA-27-1831-01	1	0	0	0	0	0	0	0	0	0	0	0	0	0	0	0	0	0	0	0	0	0	0	0	1	0	0	0	0	0	0	0	0	0	1	0	0	0	0	0	0	0	0	0	1
TCGA-27-1832-01	1	0	0	0	0	0	0	0	0	0	0	0	0	0	0	0	0	0	0	0	0	0	0	0	1	0	0	0	0	0	0	0	0	0	1	0	0	0	0	0	0	0	0	0	1
TCGA-27-1833-01	1	0	0	0	0	0	0	0	0	0	0	0	0	0	0	0	0	0	0	0	0	0	0	0	1	0	0	0	0	0	0	0	0	0	1	0	0	0	0	0	0	0	0	0	1
TCGA-27-1834-01	1	0	0	0	0	0	0	0	0	0	0	0	0	0	0	0	0	0	0	0	0	0	0	0	1	0	0	0	0	0	0	0	0	0	1	0	0	0	0	0	0	0	0	0	1
TCGA-27-1835-01	1	0	0	0	0	0	0	0	0	0	0	0	0	0	0	0	0	0	0	0	0	0	0	0	1	0	0	0	0	0	0	0	0	0	1	0	0	0	0	0	0	0	0	0	1
TCGA-27-1836-01	1	0	0	0	0	0	0	0	0	0	0	0	0	0	0	0	0	0	0	0	0	0	0	0	1	0	0	0	0	0	0	0	0	0	1	0	0	0	0	0	0	0	0	0	1
TCGA-27-1837-01	1	0	0	0	0	0	0	0	0	0	0	0	0	0	0	0	0	0	0	0	0	0	0	0	1	0	0	0	0	0	0	0	0	0	1	0	0	0	0	0	0	0	0	0	1
TCGA-27-2518-01	1	0	0	0	0	0	0	0	0	0	0	0	0	0	0	0	0	0	0	0	0	0	0	0	1	0	0	0	0	0	0	0	0	0	1	0	0	0	0	0	0	0	0	0	1
TCGA-27-2519-01	1	0	0	0	0	0	0	0	0	0	0	0	0	0	0	0	0	0	0	0	0	0	0	0	1	0	0	0	0	0	0	0	0	0	1	0	0	0	0	0	0	0	0	0	1
TCGA-27-2521-01	1	0	0	0	0	0	0	0	0	0	0	0	0	0	0	0	0	0	0	0	0	0	0	0	1	0	0	0	0	0	0	0	0	0	1	0	0	0	0	0	0	0	0	0	1
TCGA-27-2523-01	1	0	0	0	0	0	0	0	0	0	0	0	0	0	0	0	0	0	0	0	0	0	0	0	1	0	0	0	0	0	0	0	0	0	1	0	0	0	0	0	0	0	0	0	1
TCGA-27-2524-01	1	0	0	0	0	0	0	0	0	0	0	0	0	0	0	0	0	0	0	0	0	0	0	0	1	0	0	0	0	0	0	0	0	0	1	0	0	0	0	0	0	0	0	0	1
TCGA-27-2526-01	1	0	0	0	0	0	0	0	0	0	0	0	0	0	0	0	0	0	0	0	0	0	0	0	1	0	0	0	0	0	0	0	0	0	1	0	0	0	0	0	0	0	0	0	1
TCGA-27-2527-01	1	0	0	0	0	0	0	0	0	0	0	0	0	0	0	0	0	0	0	0	0	0	0	0	1	0	0	0	0	0	0	0	0	0	1	0	0	0	0	0	0	0	0	0	1
TCGA-27-2528-01	1	0	0	0	0	0	0	0	0	0	0	0	0	0	0	0	0	0	0	0	0	0	0	0	1	0	0	0	0	0	0	0	0	0	1	0	0	0	0	0	0	0	0	0	1
TCGA-28-1746-01	1	0	0	0	0	0	0	0	0	0	0	0	0	0	0	0	0	0	0	0	0	0	0	0	1	0	0	0	0	0	0	0	0	0	1	0	0	0	0	0	0	0	0	0	1
TCGA-28-1747-01	1	0	0	0	0	0	0	0	0	0	0	0	0	0	0	0	0	0	0	0	0	0	0	0	1	0	0	0	0	0	0	0	0	0	1	0	0	0	0	0	0	0	0	0	1
TCGA-28-1749-01	1	0	0	0	0	0	0	0	0	0	0	0	0	0	0	0	0	0	0	0	0	0	0	0	1	0	0	0	0	0	0	0	0	0	1	0	0	0	0	0	0	0	0	0	1
TCGA-28-1751-01	1	0	0	0	0	0	0	0	0	0	0	0	0	0	0	0	0	0	0	0	0	0	0	0	1	0	0	0	0	0	0	0	0	0	1	0	0	0	0	0	0	0	0	0	1
TCGA-28-1752-01	1	0	0	0	0	0	0	0	0	0	0	0	0	0	0	0	0	0	0	0	0	0	0	0	1	0	0	0	0	0	0	0	0	0	1	0	0	0	0	0	0	0	0	0	1
TCGA-28-1753-01	1	0	0	0	0	0	0	0	0	0	0	0	0	0	0	0	0	0	0	0	0	0	0	0	1	0	0	0	0	0	0	0	0	0	1	0	0	0	0	0	0	0	0	0	1
TCGA-28-1755-01	1	0	0	0	0	0	0	0	0	0	0	0	0	0	0	0	0	0	0	0	0	0	0	0	1	0	0	0	0	0	0	0	0	0	1	0	0	0	0	0	0	0	0	0	1
TCGA-28-1756-01	1	0	0	0	0	0	0	0	0	0	0	0	0	0	0	0	0	0	0	0	0	0	0	0	1	0	0	0	0	0	0	0	0	0	1	0	0	0	0	0	0	0	0	0	1
TCGA-28-1757-01	1	0	0	0	0	0	0	0	0	0	0	0	0	0	0	0	0	0	0	0	0	0	0	0	1	0	0	0	0	0	0	0	0	0	1	0	0	0	0	0	0	0	0	0	1
TCGA-28-2501-01	1	0	0	0	0	0	0	0	0	0	0	0	0	0	0	0	0	0	0	0	0	0	0	0	1	0	0	0	0	0	0	0	0	0	1	0	0	0	0	0	0	0	0	0	1
TCGA-28-2502-01	1	0	0	0	0	0	0	0	0	0	0	0	0	0	0	0	0	0	0	0	0	0	0	0	1	0	0	0	0	0	0	0	0	0	1	0	0	0	0	0	0	0	0	0	1
TCGA-28-2510-01	1	0	0	0	0	0	0	0	0	0	0	0	0	0	0	0	0	0	0	0	0	0	0	0	1	0	0	0	0	0	0	0	0	0	1	0	0	0	0	0	0	0	0	0	1
TCGA-28-2513-01	1	0	0	0	0	0	0	0	0	0	0	0	0	0	0	0	0	0	0	0	0	0	0	0	1	0	0	0	0	0	0	0	0	0	1	0	0	0	0	0	0	0	0	0	1
TCGA-28-2514-01	1	0	0	0	0	0	0	0	0	0	0	0	0	0	0	0	0	0	0	0	0	0	0	0	1	0	0	0	0	0	0	0	0	0	1	0	0	0	0	0	0	0	0	0	1
TCGA-28-5204-01	1	0	0	0	0	0	0	0	0	0	0	0	0	0	0	0	0	0	0	0	0	0	0	0	1	0	0	0	0	0	0	0	0	0	1	0	0	0	0	0	0	0	0	0	1
TCGA-28-5207-01	1	0	0	0	0	0	0	0	0	0	0	0	0	0	0	0	0	0	0	0	0	0	0	0	1	0	0	0	0	0	0	0	0	0	1	0	0	0	0	0	0	0	0	0	1
TCGA-28-5208-01	1	0	0	0	0	0	0	0	0	0	0	0	0	0	0	0	0	0	0	0	0	0	0	0	1	0	0	0	0	0	0	0	0	0	1	0	0	0	0	0	0	0	0	0	1
TCGA-28-5209-01	1	0	0	0	0	0	0	0	0	0	0	0	0	0	0	0	0	0	0	0	0	0	0	0	1	0	0	0	0	0	0	0	0	0	1	0	0	0	0	0	0	0	0	0	1
TCGA-28-5211-01	1	0	0	0	0	0	0	0	0	0	0	0	0	0	0	0	0	0	0	0	0	0	0	0	1	0	0	0	0	0	0	0	0	0	1	0	0	0	0	0	0	0	0	0	1
TCGA-28-5213-01	1	0	0	0	0	0	0	0	0	0	0	0	0	0	0	0	0	0	0	0	0	0	0	0	1	0	0	0	0	0	0	0	0	0	1	0	0	0	0	0	0	0	0	0	1
TCGA-28-5214-01	1	0	0	0	0	0	0	0	0	0	0	0	0	0	0	0	0	0	0	0	0	0	0	0	1	0	0	0	0	0	0	0	0	0	1	0	0	0	0	0	0	0	0	0	1
TCGA-28-5215-01	1	0	0	0	0	0	0	0	0	0	0	0	0	0	0	0	0	0	0	0	0	0	0	0	1	0	0	0	0	0	0	0	0	0	1	0	0	0	0	0	0	0	0	0	1
TCGA-28-5216-01	1	0	0	0	0	0	0	0	0	0	0	0	0	0	0	0	0	0	0	0	0	0	0	0	1	0	0	0	0	0	0	0	0	0	1	0	0	0	0	0	0	0	0	0	1
TCGA-28-5219-01	1	0	0	0	0	0	0	0	0	0	0	0	0	0	0	0	0	0	0	0	0	0	0	0	1	0	0	0	0	0	0	0	0	0	1	0	0	0	0	0	0	0	0	0	1
TCGA-28-5220-01	1	0	0	0	0	0	0	0	0	0	0	0	0	0	0	0	0	0	0	0	0	0	0	0	1	0	0	0	0	0	0	0	0	0	1	0	0	0	0	0	0	0	0	0	1
TCGA-28-6450-01	1	0	0	0	0	0	0	0	0	0	0	0	0	0	0	0	0	0	0	0	0	0	0	0	1	0	0	0	0	0	0	0	0	0	1	0	0	0	0	0	0	0	0	0	1
TCGA-29-1688-01	0	0	0	0	0	0	0	0	0	0	0	0	0	0	0	0	0	0	0	0	0	0	0	0	1	0	0	0	0	0	0	0	0	1	0	0	0	0	0	0	0	0	0	0	1
TCGA-29-1690-01	0	0	0	0	0	0	0	0	0	0	0	0	0	0	0	0	0	0	0	0	0	0	0	0	1	0	0	0	0	0	0	0	0	1	0	0	0	0	0	0	0	0	0	0	1
TCGA-29-1694-01	0	0	0	0	0	0	0	0	0	0	0	0	0	0	0	0	0	0	0	0	0	0	0	0	1	0	0	0	0	0	0	0	0	1	0	0	0	0	0	0	0	0	0	0	1
TCGA-29-1696-01	0	0	0	0	0	0	0	0	0	0	0	0	0	0	0	0	0	0	0	0	0	0	0	0	1	0	0	0	0	0	0	0	0	1	0	0	0	0	0	0	0	0	0	0	1
TCGA-29-1697-01	0	0	0	0	0	0	0	0	0	0	0	0	0	0	0	0	0	0	0	0	0	0	0	0	1	0	0	0	0	0	0	0	0	1	0	0	0	0	0	0	0	0	0	0	1
TCGA-29-1704-01	0	0	0	0	0	0	0	0	0	0	0	0	0	0	0	0	0	0	0	0	0	0	0	0	1	0	0	0	0	0	0	0	0	1	0	0	0	0	0	0	0	0	0	0	1
TCGA-29-1705-01	0	0	0	0	0	0	0	0	0	0	0	0	0	0	0	0	0	0	0	0	0	0	0	0	1	0	0	0	0	0	0	0	0	1	0	0	0	0	0	0	0	0	0	0	1
TCGA-29-1707-01	0	0	0	0	0	0	0	0	0	0	0	0	0	0	0	0	0	0	0	0	0	0	0	0	1	0	0	0	0	0	0	0	0	1	0	0	0	0	0	0	0	0	0	0	1
TCGA-29-1711-01	0	0	0	0	0	0	0	0	0	0	0	0	0	0	0	0	0	0	0	0	0	0	0	0	1	0	0	0	0	0	0	0	0	1	0	0	0	0	0	0	0	0	0	0	1
TCGA-29-1762-01	0	0	0	0	0	0	0	0	0	0	0	0	0	0	0	0	0	0	0	0	0	0	0	0	1	0	0	0	0	0	0	0	0	1	0	0	0	0	0	0	0	0	0	0	1
TCGA-29-1768-01	0	0	0	0	0	0	0	0	0	0	0	0	0	0	0	0	0	0	0	0	0	0	0	0	1	0	0	0	0	0	0	0	0	1	0	0	0	0	0	0	0	0	0	0	1
TCGA-29-1769-01	0	0	0	0	0	0	0	0	0	0	0	0	0	0	0	0	0	0	0	0	0	0	0	0	1	0	0	0	0	0	0	0	0	1	0	0	0	0	0	0	0	0	0	0	1
TCGA-29-1771-01	0	0	0	0	0	0	0	0	0	0	0	0	0	0	0	0	0	0	0	0	0	0	0	0	1	0	0	0	0	0	0	0	0	1	0	0	0	0	0	0	0	0	0	0	1
TCGA-29-1776-01	0	0	0	0	0	0	0	0	0	0	0	0	0	0	0	0	0	0	0	0	0	0	0	0	1	0	0	0	0	0	0	0	0	1	0	0	0	0	0	0	0	0	0	0	1
TCGA-29-1777-01	0	0	0	0	0	0	0	0	0	0	0	0	0	0	0	0	0	0	0	0	0	0	0	0	1	0	0	0	0	0	0	0	0	1	0	0	0	0	0	0	0	0	0	0	1
TCGA-29-1781-01	0	0	0	0	0	0	0	0	0	0	0	0	0	0	0	0	0	0	0	0	0	0	0	0	1	0	0	0	0	0	0	0	0	1	0	0	0	0	0	0	0	0	0	0	1
TCGA-29-1785-01	0	0	0	0	0	0	0	0	0	0	0	0	0	0	0	0	0	0	0	0	0	0	0	0	1	0	0	0	0	0	0	0	0	1	0	0	0	0	0	0	0	0	0	0	1
TCGA-29-2427-01	0	0	0	0	0	0	0	0	0	0	0	0	0	0	0	0	0	0	0	0	0	0	0	0	1	0	0	0	0	0	0	0	0	1	0	0	0	0	0	0	0	0	0	0	1
TCGA-29-2429-01	0	0	0	0	0	0	0	0	0	0	0	0	0	0	0	0	0	0	0	0	0	0	0	0	1	0	0	0	0	0	0	0	0	1	0	0	0	0	0	0	0	0	0	0	1
TCGA-29-2436-01	0	0	0	0	0	0	0	0	0	0	0	0	0	0	0	0	0	0	0	0	0	0	0	0	1	0	0	0	0	0	0	0	0	1	0	0	0	0	0	0	0	0	0	0	1
TCGA-2A-A8VL-01	0	0	0	0	0	0	0	0	0	0	0	0	0	0	0	0	0	0	0	0	0	0	0	0	1	0	0	0	0	0	0	0	0	0	0	0	0	1	0	0	0	0	0	0	1
TCGA-2A-A8VO-01	0	0	0	0	0	0	0	0	0	0	0	0	0	0	0	0	0	0	0	0	0	0	0	0	1	0	0	0	0	0	0	0	0	0	0	0	0	1	0	0	0	0	0	0	1
TCGA-2A-A8VV-01	0	0	0	0	0	0	0	0	0	0	0	0	0	0	0	0	0	0	0	0	0	0	0	0	1	0	0	0	0	0	0	0	0	0	0	0	0	1	0	0	0	0	0	0	1
TCGA-2A-A8VX-01	0	0	0	0	0	0	0	0	0	0	0	0	0	0	0	0	0	0	0	0	0	0	0	0	1	0	0	0	0	0	0	0	0	0	0	0	0	1	0	0	0	0	0	0	1
TCGA-2A-A8W1-01	0	0	0	0	0	0	0	0	0	0	0	0	0	0	0	0	0	0	0	0	0	0	0	0	1	0	0	0	0	0	0	0	0	0	0	0	0	1	0	0	0	0	0	0	1
TCGA-2A-A8W3-01	0	0	0	0	0	0	0	0	0	0	0	0	0	0	0	0	0	0	0	0	0	0	0	0	1	0	0	0	0	0	0	0	0	0	0	0	0	1	0	0	0	0	0	0	1
TCGA-2A-AAYF-01	0	0	0	0	0	0	0	0	0	0	0	0	0	0	0	0	0	0	0	0	0	0	0	0	1	0	0	0	0	0	0	0	0	0	0	0	0	1	0	0	0	0	0	0	1
TCGA-2A-AAYO-01	0	0	0	0	0	0	0	0	0	0	0	0	0	0	0	0	0	0	0	0	0	0	0	0	1	0	0	0	0	0	0	0	0	0	0	0	0	1	0	0	0	0	0	0	1
TCGA-2A-AAYU-01	0	0	0	0	0	0	0	0	0	0	0	0	0	0	0	0	0	0	0	0	0	0	0	0	1	0	0	0	0	0	0	0	0	0	0	0	0	1	0	0	0	0	0	0	1
TCGA-2E-A9G8-01	0	0	0	0	0	0	0	0	0	0	0	0	0	0	0	0	0	0	0	0	0	0	0	0	1	0	0	0	0	0	1	0	0	0	0	0	0	0	0	0	0	0	0	0	1
TCGA-2F-A9KQ-01	0	0	0	0	0	0	0	0	0	0	0	0	0	0	0	0	0	0	0	0	0	0	1	0	1	0	0	0	0	0	0	0	0	0	0	0	0	0	0	0	0	0	0	0	1
TCGA-2F-A9KR-01	0	0	0	0	0	0	0	0	0	0	0	0	0	0	0	0	0	0	0	0	0	0	1	0	1	0	0	0	0	0	0	0	0	0	0	0	0	0	0	0	0	0	0	0	1
TCGA-2G-AALR-01	0	0	0	0	0	0	0	0	0	0	0	0	0	0	0	0	0	0	0	1	0	0	0	0	1	0	0	0	0	0	0	0	0	0	0	0	0	0	0	0	0	0	0	0	1
TCGA-2H-A9GJ-01	0	0	0	0	0	1	0	1	0	0	0	0	0	0	0	0	0	0	0	0	0	0	0	0	1	0	0	0	0	0	0	0	0	0	0	0	0	0	0	0	0	0	0	0	1
TCGA-2H-A9GK-01	0	0	0	0	0	1	0	1	0	0	1	0	0	0	0	0	0	0	0	0	0	0	0	0	1	0	0	0	0	0	0	0	0	0	0	0	0	0	0	0	0	0	0	0	1
TCGA-2H-A9GO-01	0	0	0	0	0	1	0	1	0	0	1	0	0	0	0	0	0	0	0	0	0	0	0	0	1	0	0	0	0	0	0	0	0	0	0	0	0	0	0	0	0	0	0	0	1
TCGA-2H-A9GR-01	0	0	0	0	0	1	0	1	0	0	1	0	0	0	0	0	0	0	0	0	0	0	0	0	1	0	0	0	0	0	0	0	0	0	0	0	0	0	0	0	0	0	0	0	1
TCGA-2J-AAB1-01	0	0	0	0	1	0	0	0	0	0	0	0	0	0	0	0	0	0	0	0	0	0	0	0	1	0	0	0	0	0	0	0	0	0	0	0	0	0	0	0	0	0	0	0	1
TCGA-2J-AAB4-01	0	0	0	0	1	0	0	0	0	0	0	0	0	0	0	0	0	0	0	0	0	0	0	0	1	0	0	0	0	0	0	0	0	0	0	0	0	0	0	0	0	0	0	0	1
TCGA-2J-AAB8-01	0	0	0	0	1	0	0	0	0	0	0	0	0	0	0	0	0	0	0	0	0	0	0	0	1	0	0	0	0	0	0	0	0	0	0	0	0	0	0	0	0	0	0	0	1
TCGA-2J-AAB9-01	0	0	0	0	1	0	0	0	0	0	0	0	0	0	0	0	0	0	0	0	0	0	0	0	1	0	0	0	0	0	0	0	0	0	0	0	0	0	0	0	0	0	0	0	1
TCGA-2J-AABA-01	0	0	0	0	1	0	0	0	0	0	0	0	0	0	0	0	0	0	0	0	0	0	0	0	1	0	0	0	0	0	0	0	0	0	0	0	0	0	0	0	0	0	0	0	1
TCGA-2J-AABE-01	0	0	0	0	1	0	0	0	0	0	0	0	0	0	0	0	0	0	0	0	0	0	0	0	1	0	0	0	0	0	0	0	0	0	0	0	0	0	0	0	0	0	0	0	1
TCGA-2J-AABF-01	0	0	0	0	1	0	0	0	0	0	0	0	0	0	0	0	0	0	0	0	0	0	0	0	1	0	0	0	0	0	0	0	0	0	0	0	0	0	0	0	0	0	0	0	1
TCGA-2J-AABH-01	0	0	0	0	1	0	0	0	0	0	0	0	0	0	0	0	0	0	0	0	0	0	0	0	1	0	0	0	0	0	0	0	0	0	0	0	0	0	0	0	0	0	0	0	1
TCGA-2J-AABI-01	0	0	0	0	1	0	0	0	0	0	0	0	0	0	0	0	0	0	0	0	0	0	0	0	1	0	0	0	0	0	0	0	0	0	0	0	0	0	0	0	0	0	0	0	1
TCGA-2J-AABP-01	0	0	0	0	1	0	0	0	0	0	0	0	0	0	0	0	0	0	0	0	0	0	0	0	1	0	0	0	0	0	0	0	0	0	0	0	0	0	0	0	0	0	0	0	1
TCGA-2J-AABT-01	0	0	0	0	1	0	0	0	0	0	0	0	0	0	0	0	0	0	0	0	0	0	0	0	1	0	0	0	0	0	0	0	0	0	0	0	0	0	0	0	0	0	0	0	1
TCGA-2J-AABU-01	0	0	0	0	1	0	0	0	0	0	0	0	0	0	0	0	0	0	0	0	0	0	0	0	1	0	0	0	0	0	0	0	0	0	0	0	0	0	0	0	0	0	0	0	1
TCGA-2J-AABV-01	0	0	0	0	1	0	0	0	0	0	0	0	0	0	0	0	0	0	0	0	0	0	0	0	1	0	0	0	0	0	0	0	0	0	0	0	0	0	0	0	0	0	0	0	1
TCGA-2K-A9WE-01	0	0	0	0	0	0	0	0	0	0	0	0	0	1	0	0	0	0	0	0	0	0	0	0	1	0	0	0	0	0	0	0	0	0	0	0	0	0	1	0	0	0	0	0	1
TCGA-2L-AAQA-01	0	0	0	0	1	0	0	0	0	0	0	0	0	0	0	0	0	0	0	0	0	0	0	0	1	0	0	0	0	0	0	0	0	0	0	0	0	0	0	0	0	0	0	0	1
TCGA-2L-AAQI-01	0	0	0	0	1	0	0	0	0	0	0	0	0	0	0	0	0	0	0	0	0	0	0	0	1	0	0	0	0	0	0	0	0	0	0	0	0	0	0	0	0	0	0	0	1
TCGA-2L-AAQJ-01	0	0	0	0	1	0	0	0	0	0	0	0	0	0	0	0	0	0	0	0	0	0	0	0	1	0	0	0	0	0	0	0	0	0	0	0	0	0	0	0	0	0	0	0	1
TCGA-2V-A95S-01	0	0	0	0	0	0	0	0	0	0	0	0	0	0	0	0	0	0	0	0	0	0	0	0	1	0	0	0	0	0	0	0	0	0	0	0	0	0	0	1	0	0	0	0	1
TCGA-2W-A8YY-01	0	0	0	1	0	0	0	0	0	0	0	0	0	0	0	0	0	0	0	0	0	0	0	1	1	0	0	0	0	0	0	0	0	0	0	0	0	0	0	0	0	0	0	0	1
TCGA-2Y-A9GS-01	0	0	0	0	0	0	0	0	0	0	0	0	0	0	0	0	0	0	0	0	0	0	0	0	1	0	0	0	0	0	0	0	0	0	0	0	0	0	0	1	0	0	0	0	1
TCGA-2Y-A9GT-01	0	0	0	0	0	0	0	0	0	0	0	0	0	0	0	0	0	0	0	0	0	0	0	0	1	0	0	0	0	0	0	0	0	0	0	0	0	0	0	1	0	0	0	0	1
TCGA-2Y-A9GV-01	0	0	0	0	0	0	0	0	0	0	0	0	0	0	0	0	0	0	0	0	0	0	0	0	1	0	0	0	0	0	0	0	0	0	0	0	0	0	0	1	0	0	0	0	1
TCGA-2Y-A9GW-01	0	0	0	0	0	0	0	0	0	0	0	0	0	0	0	0	0	0	0	0	0	0	0	0	1	0	0	0	0	0	0	0	0	0	0	0	0	0	0	1	0	0	0	0	1
TCGA-2Y-A9GX-01	0	0	0	0	0	0	0	0	0	0	0	0	0	0	0	0	0	0	0	0	0	0	0	0	1	0	0	0	0	0	0	0	0	0	0	0	0	0	0	1	0	0	0	0	1
TCGA-2Y-A9H0-01	0	0	0	0	0	0	0	0	0	0	0	0	0	0	0	0	0	0	0	0	0	0	0	0	1	0	0	0	0	0	0	0	0	0	0	0	0	0	0	1	0	0	0	0	1
TCGA-2Y-A9H1-01	0	0	0	0	0	0	0	0	0	0	0	0	0	0	0	0	0	0	0	0	0	0	0	0	1	0	0	0	0	0	0	0	0	0	0	0	0	0	0	1	0	0	0	0	1
TCGA-2Y-A9H4-01	0	0	0	0	0	0	0	0	0	0	0	0	0	0	0	0	0	0	0	0	0	0	0	0	1	0	0	0	0	0	0	0	0	0	0	0	0	0	0	1	0	0	0	0	1
TCGA-2Y-A9H5-01	0	0	0	0	0	0	0	0	0	0	0	0	0	0	0	0	0	0	0	0	0	0	0	0	1	0	0	0	0	0	0	0	0	0	0	0	0	0	0	1	0	0	0	0	1
TCGA-2Y-A9H6-01	0	0	0	0	0	0	0	0	0	0	0	0	0	0	0	0	0	0	0	0	0	0	0	0	1	0	0	0	0	0	0	0	0	0	0	0	0	0	0	1	0	0	0	0	1
TCGA-2Y-A9H7-01	0	0	0	0	0	0	0	0	0	0	0	0	0	0	0	0	0	0	0	0	0	0	0	0	1	0	0	0	0	0	0	0	0	0	0	0	0	0	0	1	0	0	0	0	1
TCGA-2Y-A9H9-01	0	0	0	0	0	0	0	0	0	0	0	0	0	0	0	0	0	0	0	0	0	0	0	0	1	0	0	0	0	0	0	0	0	0	0	0	0	0	0	1	0	0	0	0	1
TCGA-2Y-A9HA-01	0	0	0	0	0	0	0	0	0	0	0	0	0	0	0	0	0	0	0	0	0	0	0	0	1	0	0	0	0	0	0	0	0	0	0	0	0	0	0	1	0	0	0	0	1
TCGA-2Y-A9HB-01	0	0	0	0	0	0	0	0	0	0	0	0	0	0	0	0	0	0	0	0	0	0	0	0	1	0	0	0	0	0	0	0	0	0	0	0	0	0	0	1	0	0	0	0	1
TCGA-2Z-A9J1-01	0	0	0	0	0	0	0	0	0	0	0	0	0	1	0	0	0	0	0	0	0	0	0	0	1	0	0	0	0	0	0	0	0	0	0	0	0	0	1	0	0	0	0	0	1
TCGA-2Z-A9J2-01	0	0	0	0	0	0	0	0	0	0	0	0	0	1	0	0	0	0	0	0	0	0	0	0	1	0	0	0	0	0	0	0	0	0	0	0	0	0	1	0	0	0	0	0	1
TCGA-2Z-A9J3-01	0	0	0	0	0	0	0	0	0	0	0	0	0	1	0	0	0	0	0	0	0	0	0	0	1	0	0	0	0	0	0	0	0	0	0	0	0	0	1	0	0	0	0	0	1
TCGA-2Z-A9J5-01	0	0	0	0	0	0	0	0	0	0	0	0	0	1	0	0	0	0	0	0	0	0	0	0	1	0	0	0	0	0	0	0	0	0	0	0	0	0	1	0	0	0	0	0	1
TCGA-2Z-A9J6-01	0	0	0	0	0	0	0	0	0	0	0	0	0	1	0	0	0	0	0	0	0	0	0	0	1	0	0	0	0	0	0	0	0	0	0	0	0	0	1	0	0	0	0	0	1
TCGA-2Z-A9J7-01	0	0	0	0	0	0	0	0	0	0	0	0	0	1	0	0	0	0	0	0	0	0	0	0	1	0	0	0	0	0	0	0	0	0	0	0	0	0	1	0	0	0	0	0	1
TCGA-2Z-A9J8-01	0	0	0	0	0	0	0	0	0	0	0	0	0	1	0	0	0	0	0	0	0	0	0	0	1	0	0	0	0	0	0	0	0	0	0	0	0	0	1	0	0	0	0	0	1
TCGA-2Z-A9J9-01	0	0	0	0	0	0	0	0	0	0	0	0	0	1	0	0	0	0	0	0	0	0	0	0	1	0	0	0	0	0	0	0	0	0	0	0	0	0	1	0	0	0	0	0	1
TCGA-2Z-A9JD-01	0	0	0	0	0	0	0	0	0	0	0	0	0	1	0	0	0	0	0	0	0	0	0	0	1	0	0	0	0	0	0	0	0	0	0	0	0	0	1	0	0	0	0	0	1
TCGA-2Z-A9JE-01	0	0	0	0	0	0	0	0	0	0	0	0	0	1	0	0	0	0	0	0	0	0	0	0	1	0	0	0	0	0	0	0	0	0	0	0	0	0	1	0	0	0	0	0	1
TCGA-2Z-A9JI-01	0	0	0	0	0	0	0	0	0	0	0	0	0	1	0	0	0	0	0	0	0	0	0	0	1	0	0	0	0	0	0	0	0	0	0	0	0	0	1	0	0	0	0	0	1
TCGA-2Z-A9JJ-01	0	0	0	0	0	0	0	0	0	0	0	0	0	1	0	0	0	0	0	0	0	0	0	0	1	0	0	0	0	0	0	0	0	0	0	0	0	0	1	0	0	0	0	0	1
TCGA-2Z-A9JK-01	0	0	0	0	0	0	0	0	0	0	0	0	0	1	0	0	0	0	0	0	0	0	0	0	1	0	0	0	0	0	0	0	0	0	0	0	0	0	1	0	0	0	0	0	1
TCGA-2Z-A9JL-01	0	0	0	0	0	0	0	0	0	0	0	0	0	1	0	0	0	0	0	0	0	0	0	0	1	0	0	0	0	0	0	0	0	0	0	0	0	0	1	0	0	0	0	0	1
TCGA-2Z-A9JM-01	0	0	0	0	0	0	0	0	0	0	0	0	0	1	0	0	0	0	0	0	0	0	0	0	1	0	0	0	0	0	0	0	0	0	0	0	0	0	1	0	0	0	0	0	1
TCGA-2Z-A9JN-01	0	0	0	0	0	0	0	0	0	0	0	0	0	1	0	0	0	0	0	0	0	0	0	0	1	0	0	0	0	0	0	0	0	0	0	0	0	0	1	0	0	0	0	0	1
TCGA-2Z-A9JO-01	0	0	0	0	0	0	0	0	0	0	0	0	0	1	0	0	0	0	0	0	0	0	0	0	1	0	0	0	0	0	0	0	0	0	0	0	0	0	1	0	0	0	0	0	1
TCGA-2Z-A9JP-01	0	0	0	0	0	0	0	0	0	0	0	0	0	1	0	0	0	0	0	0	0	0	0	0	1	0	0	0	0	0	0	0	0	0	0	0	0	0	1	0	0	0	0	0	1
TCGA-2Z-A9JQ-01	0	0	0	0	0	0	0	0	0	0	0	0	0	1	0	0	0	0	0	0	0	0	0	0	1	0	0	0	0	0	0	0	0	0	0	0	0	0	1	0	0	0	0	0	1
TCGA-2Z-A9JR-01	0	0	0	0	0	0	0	0	0	0	0	0	0	1	0	0	0	0	0	0	0	0	0	0	1	0	0	0	0	0	0	0	0	0	0	0	0	0	1	0	0	0	0	0	1
TCGA-2Z-A9JS-01	0	0	0	0	0	0	0	0	0	0	0	0	0	1	0	0	0	0	0	0	0	0	0	0	1	0	0	0	0	0	0	0	0	0	0	0	0	0	1	0	0	0	0	0	1
TCGA-2Z-A9JT-01	0	0	0	0	0	0	0	0	0	0	0	0	0	1	0	0	0	0	0	0	0	0	0	0	1	0	0	0	0	0	0	0	0	0	0	0	0	0	1	0	0	0	0	0	1
TCGA-30-1857-01	0	0	0	0	0	0	0	0	0	0	0	0	0	0	0	0	0	0	0	0	0	0	0	0	1	0	0	0	0	0	0	0	0	1	0	0	0	0	0	0	0	0	0	0	1
TCGA-30-1860-01	0	0	0	0	0	0	0	0	0	0	0	0	0	0	0	0	0	0	0	0	0	0	0	0	1	0	0	0	0	0	0	0	0	1	0	0	0	0	0	0	0	0	0	0	1
TCGA-30-1880-01	0	0	0	0	0	0	0	0	0	0	0	0	0	0	0	0	0	0	0	0	0	0	0	0	1	0	0	0	0	0	0	0	0	1	0	0	0	0	0	0	0	0	0	0	1
TCGA-30-1891-01	0	0	0	0	0	0	0	0	0	0	0	0	0	0	0	0	0	0	0	0	0	0	0	0	1	0	0	0	0	0	0	0	0	1	0	0	0	0	0	0	0	0	0	0	1
TCGA-31-1944-01	0	0	0	0	0	0	0	0	0	0	0	0	0	0	0	0	0	0	0	0	0	0	0	0	1	0	0	0	0	0	0	0	0	1	0	0	0	0	0	0	0	0	0	0	1
TCGA-31-1946-01	0	0	0	0	0	0	0	0	0	0	0	0	0	0	0	0	0	0	0	0	0	0	0	0	1	0	0	0	0	0	0	0	0	1	0	0	0	0	0	0	0	0	0	0	1
TCGA-31-1951-01	0	0	0	0	0	0	0	0	0	0	0	0	0	0	0	0	0	0	0	0	0	0	0	0	1	0	0	0	0	0	0	0	0	1	0	0	0	0	0	0	0	0	0	0	1
TCGA-31-1955-01	0	0	0	0	0	0	0	0	0	0	0	0	0	0	0	0	0	0	0	0	0	0	0	0	1	0	0	0	0	0	0	0	0	1	0	0	0	0	0	0	0	0	0	0	1
TCGA-31-1956-01	0	0	0	0	0	0	0	0	0	0	0	0	0	0	0	0	0	0	0	0	0	0	0	0	1	0	0	0	0	0	0	0	0	1	0	0	0	0	0	0	0	0	0	0	1
TCGA-31-1959-01	0	0	0	0	0	0	0	0	0	0	0	0	0	0	0	0	0	0	0	0	0	0	0	0	1	0	0	0	0	0	0	0	0	1	0	0	0	0	0	0	0	0	0	0	1
TCGA-32-1970-01	1	0	0	0	0	0	0	0	0	0	0	0	0	0	0	0	0	0	0	0	0	0	0	0	1	0	0	0	0	0	0	0	0	0	1	0	0	0	0	0	0	0	0	0	1
TCGA-32-1973-01	1	0	0	0	0	0	0	0	0	0	0	0	0	0	0	0	0	0	0	0	0	0	0	0	1	0	0	0	0	0	0	0	0	0	1	0	0	0	0	0	0	0	0	0	1
TCGA-32-1976-01	1	0	0	0	0	0	0	0	0	0	0	0	0	0	0	0	0	0	0	0	0	0	0	0	1	0	0	0	0	0	0	0	0	0	1	0	0	0	0	0	0	0	0	0	1
TCGA-32-1977-01	1	0	0	0	0	0	0	0	0	0	0	0	0	0	0	0	0	0	0	0	0	0	0	0	1	0	0	0	0	0	0	0	0	0	1	0	0	0	0	0	0	0	0	0	1
TCGA-32-1980-01	1	0	0	0	0	0	0	0	0	0	0	0	0	0	0	0	0	0	0	0	0	0	0	0	1	0	0	0	0	0	0	0	0	0	1	0	0	0	0	0	0	0	0	0	1
TCGA-32-1982-01	1	0	0	0	0	0	0	0	0	0	0	0	0	0	0	0	0	0	0	0	0	0	0	0	1	0	0	0	0	0	0	0	0	0	1	0	0	0	0	0	0	0	0	0	1
TCGA-32-1986-01	1	0	0	0	0	0	0	0	0	0	0	0	0	0	0	0	0	0	0	0	0	0	0	0	1	0	0	0	0	0	0	0	0	0	1	0	0	0	0	0	0	0	0	0	1
TCGA-32-1991-01	1	0	0	0	0	0	0	0	0	0	0	0	0	0	0	0	0	0	0	0	0	0	0	0	1	0	0	0	0	0	0	0	0	0	1	0	0	0	0	0	0	0	0	0	1
TCGA-32-2491-01	1	0	0	0	0	0	0	0	0	0	0	0	0	0	0	0	0	0	0	0	0	0	0	0	1	0	0	0	0	0	0	0	0	0	1	0	0	0	0	0	0	0	0	0	1
TCGA-32-2494-01	1	0	0	0	0	0	0	0	0	0	0	0	0	0	0	0	0	0	0	0	0	0	0	0	1	0	0	0	0	0	0	0	0	0	1	0	0	0	0	0	0	0	0	0	1
TCGA-32-2495-01	1	0	0	0	0	0	0	0	0	0	0	0	0	0	0	0	0	0	0	0	0	0	0	0	1	0	0	0	0	0	0	0	0	0	1	0	0	0	0	0	0	0	0	0	1
TCGA-32-2615-01	1	0	0	0	0	0	0	0	0	0	0	0	0	0	0	0	0	0	0	0	0	0	0	0	1	0	0	0	0	0	0	0	0	0	1	0	0	0	0	0	0	0	0	0	1
TCGA-32-2616-01	1	0	0	0	0	0	0	0	0	0	0	0	0	0	0	0	0	0	0	0	0	0	0	0	1	0	0	0	0	0	0	0	0	0	1	0	0	0	0	0	0	0	0	0	1
TCGA-32-2634-01	1	0	0	0	0	0	0	0	0	0	0	0	0	0	0	0	0	0	0	0	0	0	0	0	1	0	0	0	0	0	0	0	0	0	1	0	0	0	0	0	0	0	0	0	1
TCGA-32-2638-01	1	0	0	0	0	0	0	0	0	0	0	0	0	0	0	0	0	0	0	0	0	0	0	0	1	0	0	0	0	0	0	0	0	0	1	0	0	0	0	0	0	0	0	0	1
TCGA-32-4208-01	1	0	0	0	0	0	0	0	0	0	0	0	0	0	0	0	0	0	0	0	0	0	0	0	1	0	0	0	0	0	0	0	0	0	1	0	0	0	0	0	0	0	0	0	1
TCGA-32-4211-01	1	0	0	0	0	0	0	0	0	0	0	0	0	0	0	0	0	0	0	0	0	0	0	0	1	0	0	0	0	0	0	0	0	0	1	0	0	0	0	0	0	0	0	0	1
TCGA-32-4213-01	1	0	0	0	0	0	0	0	0	0	0	0	0	0	0	0	0	0	0	0	0	0	0	0	1	0	0	0	0	0	0	0	0	0	1	0	0	0	0	0	0	0	0	0	1
TCGA-32-4719-01	1	0	0	0	0	0	0	0	0	0	0	0	0	0	0	0	0	0	0	0	0	0	0	0	1	0	0	0	0	0	0	0	0	0	1	0	0	0	0	0	0	0	0	0	1
TCGA-33-4547-01	0	0	0	0	0	0	0	0	0	0	0	0	0	0	0	0	0	0	0	0	1	0	0	1	1	0	0	0	0	0	0	0	0	0	0	0	0	0	0	0	0	0	0	0	1
TCGA-33-6738-01	0	0	0	0	0	0	0	0	0	0	0	0	0	0	0	0	0	0	0	0	1	0	0	1	1	0	0	0	0	0	0	0	0	0	0	0	0	0	0	0	0	0	0	0	1
TCGA-33-A4WN-01	0	0	0	0	0	0	0	0	0	0	0	0	0	0	0	0	0	0	0	0	1	0	0	1	1	0	0	0	0	0	0	0	0	0	0	0	0	0	0	0	0	0	0	0	1
TCGA-33-A5GW-01	0	0	0	0	0	0	0	0	0	0	0	0	0	0	0	0	0	0	0	0	1	0	0	1	1	0	0	0	0	0	0	0	0	0	0	0	0	0	0	0	0	0	0	0	1
TCGA-33-AAS8-01	0	0	0	0	0	0	0	0	0	0	0	0	0	0	0	0	0	0	0	0	1	0	0	1	1	0	0	0	0	0	0	0	0	0	0	0	0	0	0	0	0	0	0	0	1
TCGA-33-AASI-01	0	0	0	0	0	0	0	0	0	0	0	0	0	0	0	0	0	0	0	0	1	0	0	1	1	0	0	0	0	0	0	0	0	0	0	0	0	0	0	0	0	0	0	0	1
TCGA-33-AASL-01	0	0	0	0	0	0	0	0	0	0	0	0	0	0	0	0	0	0	0	0	1	0	0	1	1	0	0	0	0	0	0	0	0	0	0	0	0	0	0	0	0	0	0	0	1
TCGA-34-2596-01	0	0	0	0	0	0	0	0	0	0	0	0	0	0	0	0	0	0	0	0	1	0	0	1	1	0	0	0	0	0	0	0	0	0	0	0	0	0	0	0	0	0	0	0	1
TCGA-34-2608-01	0	0	0	0	0	0	0	0	0	0	0	0	0	0	0	0	0	0	0	0	1	0	0	1	1	0	0	0	0	0	0	0	0	0	0	0	0	0	0	0	0	0	0	0	1
TCGA-34-5232-01	0	0	0	0	0	0	0	0	0	0	0	0	0	0	0	0	0	0	0	0	1	0	0	1	1	0	0	0	0	0	0	0	0	0	0	0	0	0	0	0	0	0	0	0	1
TCGA-34-5234-01	0	0	0	0	0	0	0	0	0	0	0	0	0	0	0	0	0	0	0	0	1	0	0	1	1	0	0	0	0	0	0	0	0	0	0	0	0	0	0	0	0	0	0	0	1
TCGA-34-5927-01	0	0	0	0	0	0	0	0	0	0	0	0	0	0	0	0	0	0	0	0	1	0	0	1	1	0	0	0	0	0	0	0	0	0	0	0	0	0	0	0	0	0	0	0	1
TCGA-34-5929-01	0	0	0	0	0	0	0	0	0	0	0	0	0	0	0	0	0	0	0	0	1	0	0	1	1	0	0	0	0	0	0	0	0	0	0	0	0	0	0	0	0	0	0	0	1
TCGA-34-8454-01	0	0	0	0	0	0	0	0	0	0	0	0	0	0	0	0	0	0	0	0	1	0	0	1	1	0	0	0	0	0	0	0	0	0	0	0	0	0	0	0	0	0	0	0	1
TCGA-35-3615-01	0	0	0	0	0	0	0	0	0	0	0	0	0	0	0	0	0	0	0	0	0	0	0	0	1	0	0	0	1	0	0	0	0	0	0	0	0	0	0	0	0	0	0	0	1
TCGA-35-4123-01	0	0	0	0	0	0	0	0	0	0	0	0	0	0	0	0	0	0	0	0	0	0	0	0	1	0	0	0	1	0	0	0	0	0	0	0	0	0	0	0	0	0	0	0	1
TCGA-36-1568-01	0	0	0	0	0	0	0	0	0	0	0	0	0	0	0	0	0	0	0	0	0	0	0	0	1	0	0	0	0	0	0	0	0	1	0	0	0	0	0	0	0	0	0	0	1
TCGA-36-1570-01	0	0	0	0	0	0	0	0	0	0	0	0	0	0	0	0	0	0	0	0	0	0	0	0	1	0	0	0	0	0	0	0	0	1	0	0	0	0	0	0	0	0	0	0	1
TCGA-36-1574-01	0	0	0	0	0	0	0	0	0	0	0	0	0	0	0	0	0	0	0	0	0	0	0	0	1	0	0	0	0	0	0	0	0	1	0	0	0	0	0	0	0	0	0	0	1
TCGA-36-1577-01	0	0	0	0	0	0	0	0	0	0	0	0	0	0	0	0	0	0	0	0	0	0	0	0	1	0	0	0	0	0	0	0	0	1	0	0	0	0	0	0	0	0	0	0	1
TCGA-36-2530-01	0	0	0	0	0	0	0	0	0	0	0	0	0	0	0	0	0	0	0	0	0	0	0	0	1	0	0	0	0	0	0	0	0	1	0	0	0	0	0	0	0	0	0	0	1
TCGA-36-2532-01	0	0	0	0	0	0	0	0	0	0	0	0	0	0	0	0	0	0	0	0	0	0	0	0	1	0	0	0	0	0	0	0	0	1	0	0	0	0	0	0	0	0	0	0	1
TCGA-36-2534-01	0	0	0	0	0	0	0	0	0	0	0	0	0	0	0	0	0	0	0	0	0	0	0	0	1	0	0	0	0	0	0	0	0	1	0	0	0	0	0	0	0	0	0	0	1
TCGA-36-2537-01	0	0	0	0	0	0	0	0	0	0	0	0	0	0	0	0	0	0	0	0	0	0	0	0	1	0	0	0	0	0	0	0	0	1	0	0	0	0	0	0	0	0	0	0	1
TCGA-36-2538-01	0	0	0	0	0	0	0	0	0	0	0	0	0	0	0	0	0	0	0	0	0	0	0	0	1	0	0	0	0	0	0	0	0	1	0	0	0	0	0	0	0	0	0	0	1
TCGA-36-2540-01	0	0	0	0	0	0	0	0	0	0	0	0	0	0	0	0	0	0	0	0	0	0	0	0	1	0	0	0	0	0	0	0	0	1	0	0	0	0	0	0	0	0	0	0	1
TCGA-36-2542-01	0	0	0	0	0	0	0	0	0	0	0	0	0	0	0	0	0	0	0	0	0	0	0	0	1	0	0	0	0	0	0	0	0	1	0	0	0	0	0	0	0	0	0	0	1
TCGA-36-2544-01	0	0	0	0	0	0	0	0	0	0	0	0	0	0	0	0	0	0	0	0	0	0	0	0	1	0	0	0	0	0	0	0	0	1	0	0	0	0	0	0	0	0	0	0	1
TCGA-36-2545-01	0	0	0	0	0	0	0	0	0	0	0	0	0	0	0	0	0	0	0	0	0	0	0	0	1	0	0	0	0	0	0	0	0	1	0	0	0	0	0	0	0	0	0	0	1
TCGA-36-2549-01	0	0	0	0	0	0	0	0	0	0	0	0	0	0	0	0	0	0	0	0	0	0	0	0	1	0	0	0	0	0	0	0	0	1	0	0	0	0	0	0	0	0	0	0	1
TCGA-37-3783-01	0	0	0	0	0	0	0	0	0	0	0	0	0	0	0	0	0	0	0	0	1	0	0	1	1	0	0	0	0	0	0	0	0	0	0	0	0	0	0	0	0	0	0	0	1
TCGA-37-3789-01	0	0	0	0	0	0	0	0	0	0	0	0	0	0	0	0	0	0	0	0	1	0	0	1	1	0	0	0	0	0	0	0	0	0	0	0	0	0	0	0	0	0	0	0	1
TCGA-37-4129-01	0	0	0	0	0	0	0	0	0	0	0	0	0	0	0	0	0	0	0	0	1	0	0	1	1	0	0	0	0	0	0	0	0	0	0	0	0	0	0	0	0	0	0	0	1
TCGA-37-4132-01	0	0	0	0	0	0	0	0	0	0	0	0	0	0	0	0	0	0	0	0	1	0	0	1	1	0	0	0	0	0	0	0	0	0	0	0	0	0	0	0	0	0	0	0	1
TCGA-37-4141-01	0	0	0	0	0	0	0	0	0	0	0	0	0	0	0	0	0	0	0	0	1	0	0	1	1	0	0	0	0	0	0	0	0	0	0	0	0	0	0	0	0	0	0	0	1
TCGA-38-4626-01	0	0	0	0	0	0	0	0	0	0	0	0	0	0	0	0	0	0	0	0	0	0	0	0	1	0	0	0	1	0	0	0	0	0	0	0	0	0	0	0	0	0	0	0	1
TCGA-38-4627-01	0	0	0	0	0	0	0	0	0	0	0	0	0	0	0	0	0	0	0	0	0	0	0	0	1	0	0	0	1	0	0	0	0	0	0	0	0	0	0	0	0	0	0	0	1
TCGA-38-7271-01	0	0	0	0	0	0	0	0	0	0	0	0	0	0	0	0	0	0	0	0	0	0	0	0	1	0	0	0	1	0	0	0	0	0	0	0	0	0	0	0	0	0	0	0	1
TCGA-38-A44F-01	0	0	0	0	0	0	0	0	0	0	0	0	0	0	0	0	0	0	0	0	0	0	0	0	1	0	0	0	1	0	0	0	0	0	0	0	0	0	0	0	0	0	0	0	1
TCGA-39-5011-01	0	0	0	0	0	0	0	0	0	0	0	0	0	0	0	0	0	0	0	0	1	0	0	1	1	0	0	0	0	0	0	0	0	0	0	0	0	0	0	0	0	0	0	0	1
TCGA-39-5019-01	0	0	0	0	0	0	0	0	0	0	0	0	0	0	0	0	0	0	0	0	1	0	0	1	1	0	0	0	0	0	0	0	0	0	0	0	0	0	0	0	0	0	0	0	1
TCGA-39-5021-01	0	0	0	0	0	0	0	0	0	0	0	0	0	0	0	0	0	0	0	0	1	0	0	1	1	0	0	0	0	0	0	0	0	0	0	0	0	0	0	0	0	0	0	0	1
TCGA-39-5022-01	0	0	0	0	0	0	0	0	0	0	0	0	0	0	0	0	0	0	0	0	1	0	0	1	1	0	0	0	0	0	0	0	0	0	0	0	0	0	0	0	0	0	0	0	1
TCGA-39-5024-01	0	0	0	0	0	0	0	0	0	0	0	0	0	0	0	0	0	0	0	0	1	0	0	1	1	0	0	0	0	0	0	0	0	0	0	0	0	0	0	0	0	0	0	0	1
TCGA-39-5027-01	0	0	0	0	0	0	0	0	0	0	0	0	0	0	0	0	0	0	0	0	1	0	0	1	1	0	0	0	0	0	0	0	0	0	0	0	0	0	0	0	0	0	0	0	1
TCGA-39-5029-01	0	0	0	0	0	0	0	0	0	0	0	0	0	0	0	0	0	0	0	0	1	0	0	1	1	0	0	0	0	0	0	0	0	0	0	0	0	0	0	0	0	0	0	0	1
TCGA-39-5030-01	0	0	0	0	0	0	0	0	0	0	0	0	0	0	0	0	0	0	0	0	1	0	0	1	1	0	0	0	0	0	0	0	0	0	0	0	0	0	0	0	0	0	0	0	1
TCGA-39-5036-01	0	0	0	0	0	0	0	0	0	0	0	0	0	0	0	0	0	0	0	0	1	0	0	1	1	0	0	0	0	0	0	0	0	0	0	0	0	0	0	0	0	0	0	0	1
TCGA-39-5039-01	0	0	0	0	0	0	0	0	0	0	0	0	0	0	0	0	0	0	0	0	1	0	0	1	1	0	0	0	0	0	0	0	0	0	0	0	0	0	0	0	0	0	0	0	1
TCGA-3A-A9I5-01	0	0	0	0	1	0	0	0	0	0	0	0	0	0	0	0	0	0	0	0	0	0	0	0	1	0	0	0	0	0	0	0	0	0	0	0	0	0	0	0	0	0	0	0	1
TCGA-3A-A9I7-01	0	0	0	0	1	0	0	0	0	0	0	0	0	0	0	0	0	0	0	0	0	0	0	0	1	0	0	0	0	0	0	0	0	0	0	0	0	0	0	0	0	0	0	0	1
TCGA-3A-A9I9-01	0	0	0	0	1	0	0	0	0	0	0	0	0	0	0	0	0	0	0	0	0	0	0	0	1	0	0	0	0	0	0	0	0	0	0	0	0	0	0	0	0	0	0	0	1
TCGA-3A-A9IB-01	0	0	0	0	1	0	0	0	0	0	0	0	0	0	0	0	0	0	0	0	0	0	0	0	1	0	0	0	0	0	0	0	0	0	0	0	0	0	0	0	0	0	0	0	1
TCGA-3A-A9IC-01	0	0	0	0	1	0	0	0	0	0	0	0	0	0	0	0	0	0	0	0	0	0	0	0	1	0	0	0	0	0	0	0	0	0	0	0	0	0	0	0	0	0	0	0	1
TCGA-3A-A9IH-01	0	0	0	0	1	0	0	0	0	0	0	0	0	0	0	0	0	0	0	0	0	0	0	0	1	0	0	0	0	0	0	0	0	0	0	0	0	0	0	0	0	0	0	0	1
TCGA-3A-A9IJ-01	0	0	0	0	1	0	0	0	0	0	0	0	0	0	0	0	0	0	0	0	0	0	0	0	1	0	0	0	0	0	0	0	0	0	0	0	0	0	0	0	0	0	0	0	1
TCGA-3A-A9IN-01	0	0	0	0	1	0	0	0	0	0	0	0	0	0	0	0	0	0	0	0	0	0	0	0	1	0	0	0	0	0	0	0	0	0	0	0	0	0	0	0	0	0	0	0	1
TCGA-3A-A9IR-01	0	0	0	0	1	0	0	0	0	0	0	0	0	0	0	0	0	0	0	0	0	0	0	0	1	0	0	0	0	0	0	0	0	0	0	0	0	0	0	0	0	0	0	0	1
TCGA-3A-A9IU-01	0	0	0	0	1	0	0	0	0	0	0	0	0	0	0	0	0	0	0	0	0	0	0	0	1	0	0	0	0	0	0	0	0	0	0	0	0	0	0	0	0	0	0	0	1
TCGA-3A-A9IX-01	0	0	0	0	1	0	0	0	0	0	0	0	0	0	0	0	0	0	0	0	0	0	0	0	1	0	0	0	0	0	0	0	0	0	0	0	0	0	0	0	0	0	0	0	1
TCGA-3A-A9IZ-01	0	0	0	0	1	0	0	0	0	0	0	0	0	0	0	0	0	0	0	0	0	0	0	0	1	0	0	0	0	0	0	0	0	0	0	0	0	0	0	0	0	0	0	0	1
TCGA-3B-A9HJ-01	0	0	0	0	0	0	0	0	0	0	0	0	0	0	0	0	0	0	0	0	0	0	0	0	1	1	0	0	0	0	0	0	0	0	0	0	0	0	0	0	0	0	0	0	1
TCGA-3B-A9HP-01	0	0	0	0	0	0	0	0	0	0	0	0	0	0	0	0	0	0	0	0	0	0	0	0	1	1	0	0	0	0	0	0	0	0	0	0	0	0	0	0	0	0	0	0	1
TCGA-3B-A9HQ-01	0	0	0	0	0	0	0	0	0	0	0	0	0	0	0	0	0	0	0	0	0	0	0	0	1	1	0	0	0	0	0	0	0	0	0	0	0	0	0	0	0	0	0	0	1
TCGA-3B-A9HU-01	0	0	0	0	0	0	0	0	0	0	0	0	0	0	0	0	0	0	0	0	0	0	0	0	1	1	0	0	0	0	0	0	0	0	0	0	0	0	0	0	0	0	0	0	1
TCGA-3B-A9HV-01	0	0	0	0	0	0	0	0	0	0	0	0	0	0	0	0	0	0	0	0	0	0	0	0	1	1	0	0	0	0	0	0	0	0	0	0	0	0	0	0	0	0	0	0	1
TCGA-3B-A9HY-01	0	0	0	0	0	0	0	0	0	0	0	0	0	0	0	0	0	0	0	0	0	0	0	0	1	1	0	0	0	0	0	0	0	0	0	0	0	0	0	0	0	0	0	0	1
TCGA-3B-A9HZ-01	0	0	0	0	0	0	0	0	0	0	0	0	0	0	0	0	0	0	0	0	0	0	0	0	1	1	0	0	0	0	0	0	0	0	0	0	0	0	0	0	0	0	0	0	1
TCGA-3B-A9I0-01	0	0	0	0	0	0	0	0	0	0	0	0	0	0	0	0	0	0	0	0	0	0	0	0	1	1	0	0	0	0	0	0	0	0	0	0	0	0	0	0	0	0	0	0	1
TCGA-3B-A9I3-01	0	0	0	0	0	0	0	0	0	0	0	0	0	0	0	0	0	0	0	0	0	0	0	0	1	1	0	0	0	0	0	0	0	0	0	0	0	0	0	0	0	0	0	0	1
TCGA-3C-AALK-01	0	0	0	0	0	0	0	0	0	0	0	1	0	0	0	0	0	0	0	0	0	0	0	0	1	0	0	0	0	0	0	0	0	0	0	0	0	0	0	0	0	0	0	0	1
TCGA-3E-AAAZ-01	0	0	0	0	1	0	0	0	0	0	0	0	0	0	0	0	0	0	0	0	0	0	0	0	1	0	0	0	0	0	0	0	0	0	0	0	0	0	0	0	0	0	0	0	1
TCGA-3G-AB0O-01	0	0	0	0	0	0	0	0	1	0	0	0	0	0	0	0	0	0	0	0	0	0	0	0	1	0	0	0	0	0	0	0	0	0	0	0	0	0	0	0	0	0	0	0	1
TCGA-3G-AB0Q-01	0	0	0	0	0	0	0	0	1	0	0	0	0	0	0	0	0	0	0	0	0	0	0	0	1	0	0	0	0	0	0	0	0	0	0	0	0	0	0	0	0	0	0	0	1
TCGA-3G-AB0T-01	0	0	0	0	0	0	0	0	1	0	0	0	0	0	0	0	0	0	0	0	0	0	0	0	1	0	0	0	0	0	0	0	0	0	0	0	0	0	0	0	0	0	0	0	1
TCGA-3G-AB14-01	0	0	0	0	0	0	0	0	1	0	0	0	0	0	0	0	0	0	0	0	0	0	0	0	1	0	0	0	0	0	0	0	0	0	0	0	0	0	0	0	0	0	0	0	1
TCGA-3G-AB19-01	0	0	0	0	0	0	0	0	1	0	0	0	0	0	0	0	0	0	0	0	0	0	0	0	1	0	0	0	0	0	0	0	0	0	0	0	0	0	0	0	0	0	0	0	1
TCGA-3H-AB3K-01	0	0	0	0	0	0	0	0	0	0	0	0	0	0	0	0	0	0	0	0	0	0	0	0	1	0	0	0	0	0	0	1	0	0	0	0	0	0	0	0	0	0	0	0	1
TCGA-3H-AB3L-01	0	0	0	0	0	0	0	0	0	0	0	0	0	0	0	0	0	0	0	0	0	0	0	0	1	0	0	0	0	0	0	1	0	0	0	0	0	0	0	0	0	0	0	0	1
TCGA-3H-AB3M-01	0	0	0	0	0	0	0	0	0	0	0	0	0	0	0	0	0	0	0	0	0	0	0	0	1	0	0	0	0	0	0	1	0	0	0	0	0	0	0	0	0	0	0	0	1
TCGA-3H-AB3S-01	0	0	0	0	0	0	0	0	0	0	0	0	0	0	0	0	0	0	0	0	0	0	0	0	1	0	0	0	0	0	0	1	0	0	0	0	0	0	0	0	0	0	0	0	1
TCGA-3H-AB3T-01	0	0	0	0	0	0	0	0	0	0	0	0	0	0	0	0	0	0	0	0	0	0	0	0	1	0	0	0	0	0	0	1	0	0	0	0	0	0	0	0	0	0	0	0	1
TCGA-3H-AB3X-01	0	0	0	0	0	0	0	0	0	0	0	0	0	0	0	0	0	0	0	0	0	0	0	0	1	0	0	0	0	0	0	1	0	0	0	0	0	0	0	0	0	0	0	0	1
TCGA-3M-AB46-01	0	0	0	0	0	0	0	1	0	0	1	0	0	0	0	0	0	0	0	0	0	0	0	0	1	0	0	0	0	0	0	0	0	0	0	0	1	0	0	0	0	0	0	0	1
TCGA-3M-AB47-01	0	0	0	0	0	0	0	1	0	0	1	0	0	0	0	0	0	0	0	0	0	0	0	0	1	0	0	0	0	0	0	0	0	0	0	0	1	0	0	0	0	0	0	0	1
TCGA-3N-A9WB-06	0	0	0	0	0	0	0	0	0	0	0	0	0	0	0	0	0	0	0	0	0	0	0	0	1	0	0	0	0	0	0	0	0	0	0	1	0	0	0	0	0	0	0	0	1
TCGA-3N-A9WC-06	0	0	0	0	0	0	0	0	0	0	0	0	0	0	0	0	0	0	0	0	0	0	0	0	1	0	0	0	0	0	0	0	0	0	0	1	0	0	0	0	0	0	0	0	1
TCGA-3N-A9WD-06	0	0	0	0	0	0	0	0	0	0	0	0	0	0	0	0	0	0	0	0	0	0	0	0	1	0	0	0	0	0	0	0	0	0	0	1	0	0	0	0	0	0	0	0	1
TCGA-3Q-A9WF-01	0	0	0	0	0	0	0	0	1	0	0	0	0	0	0	0	0	0	0	0	0	0	0	0	1	0	0	0	0	0	0	0	0	0	0	0	0	0	0	0	0	0	0	0	1
TCGA-3U-A98D-01	0	0	0	0	0	0	0	0	0	0	0	0	0	0	0	0	0	0	0	0	0	0	0	0	1	0	0	0	0	0	0	1	0	0	0	0	0	0	0	0	0	0	0	0	1
TCGA-3U-A98E-01	0	0	0	0	0	0	0	0	0	0	0	0	0	0	0	0	0	0	0	0	0	0	0	0	1	0	0	0	0	0	0	1	0	0	0	0	0	0	0	0	0	0	0	0	1
TCGA-3U-A98G-01	0	0	0	0	0	0	0	0	0	0	0	0	0	0	0	0	0	0	0	0	0	0	0	0	1	0	0	0	0	0	0	1	0	0	0	0	0	0	0	0	0	0	0	0	1
TCGA-3U-A98H-01	0	0	0	0	0	0	0	0	0	0	0	0	0	0	0	0	0	0	0	0	0	0	0	0	1	0	0	0	0	0	0	1	0	0	0	0	0	0	0	0	0	0	0	0	1
TCGA-3U-A98I-01	0	0	0	0	0	0	0	0	0	0	0	0	0	0	0	0	0	0	0	0	0	0	0	0	1	0	0	0	0	0	0	1	0	0	0	0	0	0	0	0	0	0	0	0	1
TCGA-3U-A98J-01	0	0	0	0	0	0	0	0	0	0	0	0	0	0	0	0	0	0	0	0	0	0	0	0	1	0	0	0	0	0	0	1	0	0	0	0	0	0	0	0	0	0	0	0	1
TCGA-3X-AAV9-01	0	0	0	0	0	0	0	0	0	0	0	0	0	0	0	0	0	0	0	0	0	0	0	0	1	0	0	1	0	0	0	0	0	0	0	0	0	0	0	0	0	0	0	0	1
TCGA-3X-AAVA-01	0	0	0	0	0	0	0	0	0	0	0	0	0	0	0	0	0	0	0	0	0	0	0	0	1	0	0	1	0	0	0	0	0	0	0	0	0	0	0	0	0	0	0	0	1
TCGA-3X-AAVE-01	0	0	0	0	0	0	0	0	0	0	0	0	0	0	0	0	0	0	0	0	0	0	0	0	1	0	0	1	0	0	0	0	0	0	0	0	0	0	0	0	0	0	0	0	1
TCGA-3Z-A93Z-01	0	0	0	0	0	0	0	0	0	0	0	0	0	1	0	0	0	0	0	0	0	1	0	0	1	0	0	0	0	0	0	0	0	0	0	0	0	0	0	0	0	0	0	0	1
TCGA-41-2571-01	1	0	0	0	0	0	0	0	0	0	0	0	0	0	0	0	0	0	0	0	0	0	0	0	1	0	0	0	0	0	0	0	0	0	1	0	0	0	0	0	0	0	0	0	1
TCGA-41-2572-01	1	0	0	0	0	0	0	0	0	0	0	0	0	0	0	0	0	0	0	0	0	0	0	0	1	0	0	0	0	0	0	0	0	0	1	0	0	0	0	0	0	0	0	0	1
TCGA-41-2575-01	1	0	0	0	0	0	0	0	0	0	0	0	0	0	0	0	0	0	0	0	0	0	0	0	1	0	0	0	0	0	0	0	0	0	1	0	0	0	0	0	0	0	0	0	1
TCGA-41-3392-01	1	0	0	0	0	0	0	0	0	0	0	0	0	0	0	0	0	0	0	0	0	0	0	0	1	0	0	0	0	0	0	0	0	0	1	0	0	0	0	0	0	0	0	0	1
TCGA-41-3393-01	1	0	0	0	0	0	0	0	0	0	0	0	0	0	0	0	0	0	0	0	0	0	0	0	1	0	0	0	0	0	0	0	0	0	1	0	0	0	0	0	0	0	0	0	1
TCGA-41-3915-01	1	0	0	0	0	0	0	0	0	0	0	0	0	0	0	0	0	0	0	0	0	0	0	0	1	0	0	0	0	0	0	0	0	0	1	0	0	0	0	0	0	0	0	0	1
TCGA-41-4097-01	1	0	0	0	0	0	0	0	0	0	0	0	0	0	0	0	0	0	0	0	0	0	0	0	1	0	0	0	0	0	0	0	0	0	1	0	0	0	0	0	0	0	0	0	1
TCGA-41-5651-01	1	0	0	0	0	0	0	0	0	0	0	0	0	0	0	0	0	0	0	0	0	0	0	0	1	0	0	0	0	0	0	0	0	0	1	0	0	0	0	0	0	0	0	0	1
TCGA-41-6646-01	1	0	0	0	0	0	0	0	0	0	0	0	0	0	0	0	0	0	0	0	0	0	0	0	1	0	0	0	0	0	0	0	0	0	1	0	0	0	0	0	0	0	0	0	1
TCGA-42-2582-01	0	0	0	0	0	0	0	0	0	0	0	0	0	0	0	0	0	0	0	0	0	0	0	0	1	0	0	0	0	0	0	0	0	1	0	0	0	0	0	0	0	0	0	0	1
TCGA-42-2588-01	0	0	0	0	0	0	0	0	0	0	0	0	0	0	0	0	0	0	0	0	0	0	0	0	1	0	0	0	0	0	0	0	0	1	0	0	0	0	0	0	0	0	0	0	1
TCGA-42-2589-01	0	0	0	0	0	0	0	0	0	0	0	0	0	0	0	0	0	0	0	0	0	0	0	0	1	0	0	0	0	0	0	0	0	1	0	0	0	0	0	0	0	0	0	0	1
TCGA-42-2590-01	0	0	0	0	0	0	0	0	0	0	0	0	0	0	0	0	0	0	0	0	0	0	0	0	1	0	0	0	0	0	0	0	0	1	0	0	0	0	0	0	0	0	0	0	1
TCGA-42-2591-01	0	0	0	0	0	0	0	0	0	0	0	0	0	0	0	0	0	0	0	0	0	0	0	0	1	0	0	0	0	0	0	0	0	1	0	0	0	0	0	0	0	0	0	0	1
TCGA-43-2578-01	0	0	0	0	0	0	0	0	0	0	0	0	0	0	0	0	0	0	0	0	1	0	0	1	1	0	0	0	0	0	0	0	0	0	0	0	0	0	0	0	0	0	0	0	1
TCGA-43-6647-01	0	0	0	0	0	0	0	0	0	0	0	0	0	0	0	0	0	0	0	0	1	0	0	1	1	0	0	0	0	0	0	0	0	0	0	0	0	0	0	0	0	0	0	0	1
TCGA-43-6770-01	0	0	0	0	0	0	0	0	0	0	0	0	0	0	0	0	0	0	0	0	1	0	0	1	1	0	0	0	0	0	0	0	0	0	0	0	0	0	0	0	0	0	0	0	1
TCGA-43-6771-01	0	0	0	0	0	0	0	0	0	0	0	0	0	0	0	0	0	0	0	0	1	0	0	1	1	0	0	0	0	0	0	0	0	0	0	0	0	0	0	0	0	0	0	0	1
TCGA-43-6773-01	0	0	0	0	0	0	0	0	0	0	0	0	0	0	0	0	0	0	0	0	1	0	0	1	1	0	0	0	0	0	0	0	0	0	0	0	0	0	0	0	0	0	0	0	1
TCGA-43-7656-01	0	0	0	0	0	0	0	0	0	0	0	0	0	0	0	0	0	0	0	0	1	0	0	1	1	0	0	0	0	0	0	0	0	0	0	0	0	0	0	0	0	0	0	0	1
TCGA-43-8115-01	0	0	0	0	0	0	0	0	0	0	0	0	0	0	0	0	0	0	0	0	1	0	0	1	1	0	0	0	0	0	0	0	0	0	0	0	0	0	0	0	0	0	0	0	1
TCGA-43-8116-01	0	0	0	0	0	0	0	0	0	0	0	0	0	0	0	0	0	0	0	0	1	0	0	1	1	0	0	0	0	0	0	0	0	0	0	0	0	0	0	0	0	0	0	0	1
TCGA-43-A56U-01	0	0	0	0	0	0	0	0	0	0	0	0	0	0	0	0	0	0	0	0	1	0	0	1	1	0	0	0	0	0	0	0	0	0	0	0	0	0	0	0	0	0	0	0	1
TCGA-43-A56V-01	0	0	0	0	0	0	0	0	0	0	0	0	0	0	0	0	0	0	0	0	1	0	0	1	1	0	0	0	0	0	0	0	0	0	0	0	0	0	0	0	0	0	0	0	1
TCGA-44-2655-01	0	0	0	0	0	0	0	0	0	0	0	0	0	0	0	0	0	0	0	0	0	0	0	0	1	0	0	0	1	0	0	0	0	0	0	0	0	0	0	0	0	0	0	0	1
TCGA-44-2657-01	0	0	0	0	0	0	0	0	0	0	0	0	0	0	0	0	0	0	0	0	0	0	0	0	1	0	0	0	1	0	0	0	0	0	0	0	0	0	0	0	0	0	0	0	1
TCGA-44-3396-01	0	0	0	0	0	0	0	0	0	0	0	0	0	0	0	0	0	0	0	0	0	0	0	0	1	0	0	0	1	0	0	0	0	0	0	0	0	0	0	0	0	0	0	0	1
TCGA-44-3398-01	0	0	0	0	0	0	0	0	0	0	0	0	0	0	0	0	0	0	0	0	0	0	0	0	1	0	0	0	1	0	0	0	0	0	0	0	0	0	0	0	0	0	0	0	1
TCGA-44-3919-01	0	0	0	0	0	0	0	0	0	0	0	0	0	0	0	0	0	0	0	0	0	0	0	0	1	0	0	0	1	0	0	0	0	0	0	0	0	0	0	0	0	0	0	0	1
TCGA-44-5643-01	0	0	0	0	0	0	0	0	0	0	0	0	0	0	0	0	0	0	0	0	0	0	0	0	1	0	0	0	1	0	0	0	0	0	0	0	0	0	0	0	0	0	0	0	1
TCGA-44-6144-01	0	0	0	0	0	0	0	0	0	0	0	0	0	0	0	0	0	0	0	0	0	0	0	0	1	0	0	0	1	0	0	0	0	0	0	0	0	0	0	0	0	0	0	0	1
TCGA-44-6145-01	0	0	0	0	0	0	0	0	0	0	0	0	0	0	0	0	0	0	0	0	0	0	0	0	1	0	0	0	1	0	0	0	0	0	0	0	0	0	0	0	0	0	0	0	1
TCGA-44-6148-01	0	0	0	0	0	0	0	0	0	0	0	0	0	0	0	0	0	0	0	0	0	0	0	0	1	0	0	0	1	0	0	0	0	0	0	0	0	0	0	0	0	0	0	0	1
TCGA-44-6774-01	0	0	0	0	0	0	0	0	0	0	0	0	0	0	0	0	0	0	0	0	0	0	0	0	1	0	0	0	1	0	0	0	0	0	0	0	0	0	0	0	0	0	0	0	1
TCGA-44-6776-01	0	0	0	0	0	0	0	0	0	0	0	0	0	0	0	0	0	0	0	0	0	0	0	0	1	0	0	0	1	0	0	0	0	0	0	0	0	0	0	0	0	0	0	0	1
TCGA-44-6777-01	0	0	0	0	0	0	0	0	0	0	0	0	0	0	0	0	0	0	0	0	0	0	0	0	1	0	0	0	1	0	0	0	0	0	0	0	0	0	0	0	0	0	0	0	1
TCGA-44-6779-01	0	0	0	0	0	0	0	0	0	0	0	0	0	0	0	0	0	0	0	0	0	0	0	0	1	0	0	0	1	0	0	0	0	0	0	0	0	0	0	0	0	0	0	0	1
TCGA-44-7659-01	0	0	0	0	0	0	0	0	0	0	0	0	0	0	0	0	0	0	0	0	0	0	0	0	1	0	0	0	1	0	0	0	0	0	0	0	0	0	0	0	0	0	0	0	1
TCGA-44-7661-01	0	0	0	0	0	0	0	0	0	0	0	0	0	0	0	0	0	0	0	0	0	0	0	0	1	0	0	0	1	0	0	0	0	0	0	0	0	0	0	0	0	0	0	0	1
TCGA-44-8120-01	0	0	0	0	0	0	0	0	0	0	0	0	0	0	0	0	0	0	0	0	0	0	0	0	1	0	0	0	1	0	0	0	0	0	0	0	0	0	0	0	0	0	0	0	1
TCGA-44-A479-01	0	0	0	0	0	0	0	0	0	0	0	0	0	0	0	0	0	0	0	0	0	0	0	0	1	0	0	0	1	0	0	0	0	0	0	0	0	0	0	0	0	0	0	0	1
TCGA-44-A47G-01	0	0	0	0	0	0	0	0	0	0	0	0	0	0	0	0	0	0	0	0	0	0	0	0	1	0	0	0	1	0	0	0	0	0	0	0	0	0	0	0	0	0	0	0	1
TCGA-46-3766-01	0	0	0	0	0	0	0	0	0	0	0	0	0	0	0	0	0	0	0	0	1	0	0	1	1	0	0	0	0	0	0	0	0	0	0	0	0	0	0	0	0	0	0	0	1
TCGA-46-3767-01	0	0	0	0	0	0	0	0	0	0	0	0	0	0	0	0	0	0	0	0	1	0	0	1	1	0	0	0	0	0	0	0	0	0	0	0	0	0	0	0	0	0	0	0	1
TCGA-49-4486-01	0	0	0	0	0	0	0	0	0	0	0	0	0	0	0	0	0	0	0	0	0	0	0	0	1	0	0	0	1	0	0	0	0	0	0	0	0	0	0	0	0	0	0	0	1
TCGA-49-4494-01	0	0	0	0	0	0	0	0	0	0	0	0	0	0	0	0	0	0	0	0	0	0	0	0	1	0	0	0	1	0	0	0	0	0	0	0	0	0	0	0	0	0	0	0	1
TCGA-49-4514-01	0	0	0	0	0	0	0	0	0	0	0	0	0	0	0	0	0	0	0	0	0	0	0	0	1	0	0	0	1	0	0	0	0	0	0	0	0	0	0	0	0	0	0	0	1
TCGA-49-6744-01	0	0	0	0	0	0	0	0	0	0	0	0	0	0	0	0	0	0	0	0	0	0	0	0	1	0	0	0	1	0	0	0	0	0	0	0	0	0	0	0	0	0	0	0	1
TCGA-49-AAQV-01	0	0	0	0	0	0	0	0	0	0	0	0	0	0	0	0	0	0	0	0	0	0	0	0	1	0	0	0	1	0	0	0	0	0	0	0	0	0	0	0	0	0	0	0	1
TCGA-49-AAR0-01	0	0	0	0	0	0	0	0	0	0	0	0	0	0	0	0	0	0	0	0	0	0	0	0	1	0	0	0	1	0	0	0	0	0	0	0	0	0	0	0	0	0	0	0	1
TCGA-49-AAR2-01	0	0	0	0	0	0	0	0	0	0	0	0	0	0	0	0	0	0	0	0	0	0	0	0	1	0	0	0	1	0	0	0	0	0	0	0	0	0	0	0	0	0	0	0	1
TCGA-49-AAR3-01	0	0	0	0	0	0	0	0	0	0	0	0	0	0	0	0	0	0	0	0	0	0	0	0	1	0	0	0	1	0	0	0	0	0	0	0	0	0	0	0	0	0	0	0	1
TCGA-49-AAR4-01	0	0	0	0	0	0	0	0	0	0	0	0	0	0	0	0	0	0	0	0	0	0	0	0	1	0	0	0	1	0	0	0	0	0	0	0	0	0	0	0	0	0	0	0	1
TCGA-49-AAR9-01	0	0	0	0	0	0	0	0	0	0	0	0	0	0	0	0	0	0	0	0	0	0	0	0	1	0	0	0	1	0	0	0	0	0	0	0	0	0	0	0	0	0	0	0	1
TCGA-49-AARN-01	0	0	0	0	0	0	0	0	0	0	0	0	0	0	0	0	0	0	0	0	0	0	0	0	1	0	0	0	1	0	0	0	0	0	0	0	0	0	0	0	0	0	0	0	1
TCGA-49-AARR-01	0	0	0	0	0	0	0	0	0	0	0	0	0	0	0	0	0	0	0	0	0	0	0	0	1	0	0	0	1	0	0	0	0	0	0	0	0	0	0	0	0	0	0	0	1
TCGA-4A-A93W-01	0	0	0	0	0	0	0	0	0	0	0	0	0	1	0	0	0	0	0	0	0	0	0	0	1	0	0	0	0	0	0	0	0	0	0	0	0	0	1	0	0	0	0	0	1
TCGA-4C-A93U-01	0	0	0	0	0	0	0	0	0	0	0	0	0	0	1	0	0	0	0	0	0	0	0	0	1	0	0	0	0	0	0	0	0	0	0	0	0	0	0	0	0	0	0	0	1
TCGA-4E-A92E-01	0	0	0	0	0	0	0	0	0	0	0	0	0	0	0	0	0	0	0	0	0	0	0	0	1	0	0	0	0	0	1	0	0	0	0	0	0	0	0	0	0	0	0	0	1
TCGA-4G-AAZT-01	0	0	0	0	0	0	0	0	0	0	0	0	0	0	0	0	0	0	0	0	0	0	0	0	1	0	0	1	0	0	0	0	0	0	0	0	0	0	0	0	0	0	0	0	1
TCGA-4J-AA1J-01	0	0	0	1	0	0	0	0	0	0	0	0	0	0	0	0	0	0	0	0	0	0	0	1	1	0	0	0	0	0	0	0	0	0	0	0	0	0	0	0	0	0	0	0	1
TCGA-4K-AA1H-01	0	0	0	0	0	0	0	0	0	0	0	0	0	0	0	0	0	0	0	1	0	0	0	0	1	0	0	0	0	0	0	0	0	0	0	0	0	0	0	0	0	0	0	0	1
TCGA-4N-A93T-01	0	0	0	0	0	0	0	0	0	0	0	0	0	0	0	0	0	0	0	0	0	0	0	0	1	0	0	0	0	0	0	0	1	0	0	0	0	0	0	0	0	0	1	0	1
TCGA-4P-AA8J-01	0	0	0	0	0	0	0	0	0	0	0	0	0	0	0	1	0	0	0	0	0	0	0	1	1	0	0	0	0	0	0	0	0	0	0	0	0	0	0	0	0	0	0	0	1
TCGA-4R-AA8I-01	0	0	0	0	0	0	0	0	0	0	0	0	0	0	0	0	0	0	0	0	0	0	0	0	1	0	0	0	0	0	0	0	0	0	0	0	0	0	0	1	0	0	0	0	1
TCGA-4V-A9QI-01	0	0	0	0	0	0	0	0	1	0	0	0	0	0	0	0	0	0	0	0	0	0	0	0	1	0	0	0	0	0	0	0	0	0	0	0	0	0	0	0	0	0	0	0	1
TCGA-4V-A9QJ-01	0	0	0	0	0	0	0	0	1	0	0	0	0	0	0	0	0	0	0	0	0	0	0	0	1	0	0	0	0	0	0	0	0	0	0	0	0	0	0	0	0	0	0	0	1
TCGA-4V-A9QL-01	0	0	0	0	0	0	0	0	1	0	0	0	0	0	0	0	0	0	0	0	0	0	0	0	1	0	0	0	0	0	0	0	0	0	0	0	0	0	0	0	0	0	0	0	1
TCGA-4V-A9QM-01	0	0	0	0	0	0	0	0	1	0	0	0	0	0	0	0	0	0	0	0	0	0	0	0	1	0	0	0	0	0	0	0	0	0	0	0	0	0	0	0	0	0	0	0	1
TCGA-4V-A9QN-01	0	0	0	0	0	0	0	0	1	0	0	0	0	0	0	0	0	0	0	0	0	0	0	0	1	0	0	0	0	0	0	0	0	0	0	0	0	0	0	0	0	0	0	0	1
TCGA-4V-A9QS-01	0	0	0	0	0	0	0	0	1	0	0	0	0	0	0	0	0	0	0	0	0	0	0	0	1	0	0	0	0	0	0	0	0	0	0	0	0	0	0	0	0	0	0	0	1
TCGA-4V-A9QT-01	0	0	0	0	0	0	0	0	1	0	0	0	0	0	0	0	0	0	0	0	0	0	0	0	1	0	0	0	0	0	0	0	0	0	0	0	0	0	0	0	0	0	0	0	1
TCGA-4V-A9QU-01	0	0	0	0	0	0	0	0	1	0	0	0	0	0	0	0	0	0	0	0	0	0	0	0	1	0	0	0	0	0	0	0	0	0	0	0	0	0	0	0	0	0	0	0	1
TCGA-4V-A9QW-01	0	0	0	0	0	0	0	0	1	0	0	0	0	0	0	0	0	0	0	0	0	0	0	0	1	0	0	0	0	0	0	0	0	0	0	0	0	0	0	0	0	0	0	0	1
TCGA-4V-A9QX-01	0	0	0	0	0	0	0	0	1	0	0	0	0	0	0	0	0	0	0	0	0	0	0	0	1	0	0	0	0	0	0	0	0	0	0	0	0	0	0	0	0	0	0	0	1
TCGA-4W-AA9S-01	1	0	0	0	0	0	0	0	0	0	0	0	0	0	0	0	0	0	0	0	0	0	0	0	1	0	0	0	0	0	0	0	0	0	1	0	0	0	0	0	0	0	0	0	1
TCGA-4W-AA9T-01	1	0	0	0	0	0	0	0	0	0	0	0	0	0	0	0	0	0	0	0	0	0	0	0	1	0	0	0	0	0	0	0	0	0	1	0	0	0	0	0	0	0	0	0	1
TCGA-4X-A9FA-01	0	0	0	0	0	0	0	0	1	0	0	0	0	0	0	0	0	0	0	0	0	0	0	0	1	0	0	0	0	0	0	0	0	0	0	0	0	0	0	0	0	0	0	0	1
TCGA-4Z-AA7O-01	0	0	0	0	0	0	0	0	0	0	0	0	0	0	0	0	0	0	0	0	0	0	1	0	1	0	0	0	0	0	0	0	0	0	0	0	0	0	0	0	0	0	0	0	1
TCGA-4Z-AA7Y-01	0	0	0	0	0	0	0	0	0	0	0	0	0	0	0	0	0	0	0	0	0	0	1	0	1	0	0	0	0	0	0	0	0	0	0	0	0	0	0	0	0	0	0	0	1
TCGA-4Z-AA83-01	0	0	0	0	0	0	0	0	0	0	0	0	0	0	0	0	0	0	0	0	0	0	1	0	1	0	0	0	0	0	0	0	0	0	0	0	0	0	0	0	0	0	0	0	1
TCGA-4Z-AA89-01	0	0	0	0	0	0	0	0	0	0	0	0	0	0	0	0	0	0	0	0	0	0	1	1	1	0	0	0	0	0	0	0	0	0	0	0	0	0	0	0	0	0	0	0	1
TCGA-50-5044-01	0	0	0	0	0	0	0	0	0	0	0	0	0	0	0	0	0	0	0	0	0	0	0	0	1	0	0	0	1	0	0	0	0	0	0	0	0	0	0	0	0	0	0	0	1
TCGA-50-5045-01	0	0	0	0	0	0	0	0	0	0	0	0	0	0	0	0	0	0	0	0	0	0	0	0	1	0	0	0	1	0	0	0	0	0	0	0	0	0	0	0	0	0	0	0	1
TCGA-50-5049-01	0	0	0	0	0	0	0	0	0	0	0	0	0	0	0	0	0	0	0	0	0	0	0	0	1	0	0	0	1	0	0	0	0	0	0	0	0	0	0	0	0	0	0	0	1
TCGA-50-5055-01	0	0	0	0	0	0	0	0	0	0	0	0	0	0	0	0	0	0	0	0	0	0	0	0	1	0	0	0	1	0	0	0	0	0	0	0	0	0	0	0	0	0	0	0	1
TCGA-50-5931-01	0	0	0	0	0	0	0	0	0	0	0	0	0	0	0	0	0	0	0	0	0	0	0	0	1	0	0	0	1	0	0	0	0	0	0	0	0	0	0	0	0	0	0	0	1
TCGA-50-5932-01	0	0	0	0	0	0	0	0	0	0	0	0	0	0	0	0	0	0	0	0	0	0	0	0	1	0	0	0	1	0	0	0	0	0	0	0	0	0	0	0	0	0	0	0	1
TCGA-50-5936-01	0	0	0	0	0	0	0	0	0	0	0	0	0	0	0	0	0	0	0	0	0	0	0	0	1	0	0	0	1	0	0	0	0	0	0	0	0	0	0	0	0	0	0	0	1
TCGA-50-5939-01	0	0	0	0	0	0	0	0	0	0	0	0	0	0	0	0	0	0	0	0	0	0	0	0	1	0	0	0	1	0	0	0	0	0	0	0	0	0	0	0	0	0	0	0	1
TCGA-50-5942-01	0	0	0	0	0	0	0	0	0	0	0	0	0	0	0	0	0	0	0	0	0	0	0	0	1	0	0	0	1	0	0	0	0	0	0	0	0	0	0	0	0	0	0	0	1
TCGA-50-8457-01	0	0	0	0	0	0	0	0	0	0	0	0	0	0	0	0	0	0	0	0	0	0	0	0	1	0	0	0	1	0	0	0	0	0	0	0	0	0	0	0	0	0	0	0	1
TCGA-50-8459-01	0	0	0	0	0	0	0	0	0	0	0	0	0	0	0	0	0	0	0	0	0	0	0	0	1	0	0	0	1	0	0	0	0	0	0	0	0	0	0	0	0	0	0	0	1
TCGA-50-8460-01	0	0	0	0	0	0	0	0	0	0	0	0	0	0	0	0	0	0	0	0	0	0	0	0	1	0	0	0	1	0	0	0	0	0	0	0	0	0	0	0	0	0	0	0	1
TCGA-51-4079-01	0	0	0	0	0	0	0	0	0	0	0	0	0	0	0	0	0	0	0	0	1	0	0	1	1	0	0	0	0	0	0	0	0	0	0	0	0	0	0	0	0	0	0	0	1
TCGA-51-4080-01	0	0	0	0	0	0	0	0	0	0	0	0	0	0	0	0	0	0	0	0	1	0	0	1	1	0	0	0	0	0	0	0	0	0	0	0	0	0	0	0	0	0	0	0	1
TCGA-52-7622-01	0	0	0	0	0	0	0	0	0	0	0	0	0	0	0	0	0	0	0	0	1	0	0	1	1	0	0	0	0	0	0	0	0	0	0	0	0	0	0	0	0	0	0	0	1
TCGA-52-7812-01	0	0	0	0	0	0	0	0	0	0	0	0	0	0	0	0	0	0	0	0	1	0	0	1	1	0	0	0	0	0	0	0	0	0	0	0	0	0	0	0	0	0	0	0	1
TCGA-53-7626-01	0	0	0	0	0	0	0	0	0	0	0	0	0	0	0	0	0	0	0	0	0	0	0	0	1	0	0	0	1	0	0	0	0	0	0	0	0	0	0	0	0	0	0	0	1
TCGA-55-6543-01	0	0	0	0	0	0	0	0	0	0	0	0	0	0	0	0	0	0	0	0	0	0	0	0	1	0	0	0	1	0	0	0	0	0	0	0	0	0	0	0	0	0	0	0	1
TCGA-55-6968-01	0	0	0	0	0	0	0	0	0	0	0	0	0	0	0	0	0	0	0	0	0	0	0	0	1	0	0	0	1	0	0	0	0	0	0	0	0	0	0	0	0	0	0	0	1
TCGA-55-6970-01	0	0	0	0	0	0	0	0	0	0	0	0	0	0	0	0	0	0	0	0	0	0	0	0	1	0	0	0	1	0	0	0	0	0	0	0	0	0	0	0	0	0	0	0	1
TCGA-55-6975-01	0	0	0	0	0	0	0	0	0	0	0	0	0	0	0	0	0	0	0	0	0	0	0	0	1	0	0	0	1	0	0	0	0	0	0	0	0	0	0	0	0	0	0	0	1
TCGA-55-6978-01	0	0	0	0	0	0	0	0	0	0	0	0	0	0	0	0	0	0	0	0	0	0	0	0	1	0	0	0	1	0	0	0	0	0	0	0	0	0	0	0	0	0	0	0	1
TCGA-55-6979-01	0	0	0	0	0	0	0	0	0	0	0	0	0	0	0	0	0	0	0	0	0	0	0	0	1	0	0	0	1	0	0	0	0	0	0	0	0	0	0	0	0	0	0	0	1
TCGA-55-6980-01	0	0	0	0	0	0	0	0	0	0	0	0	0	0	0	0	0	0	0	0	0	0	0	0	1	0	0	0	1	0	0	0	0	0	0	0	0	0	0	0	0	0	0	0	1
TCGA-55-6983-01	0	0	0	0	0	0	0	0	0	0	0	0	0	0	0	0	0	0	0	0	0	0	0	0	1	0	0	0	1	0	0	0	0	0	0	0	0	0	0	0	0	0	0	0	1
TCGA-55-6985-01	0	0	0	0	0	0	0	0	0	0	0	0	0	0	0	0	0	0	0	0	0	0	0	0	1	0	0	0	1	0	0	0	0	0	0	0	0	0	0	0	0	0	0	0	1
TCGA-55-6986-01	0	0	0	0	0	0	0	0	0	0	0	0	0	0	0	0	0	0	0	0	0	0	0	0	1	0	0	0	1	0	0	0	0	0	0	0	0	0	0	0	0	0	0	0	1
TCGA-55-7284-01	0	0	0	0	0	0	0	0	0	0	0	0	0	0	0	0	0	0	0	0	0	0	0	0	1	0	0	0	1	0	0	0	0	0	0	0	0	0	0	0	0	0	0	0	1
TCGA-55-7570-01	0	0	0	0	0	0	0	0	0	0	0	0	0	0	0	0	0	0	0	0	0	0	0	0	1	0	0	0	1	0	0	0	0	0	0	0	0	0	0	0	0	0	0	0	1
TCGA-55-7724-01	0	0	0	0	0	0	0	0	0	0	0	0	0	0	0	0	0	0	0	0	0	0	0	0	1	0	0	0	1	0	0	0	0	0	0	0	0	0	0	0	0	0	0	0	1
TCGA-55-7725-01	0	0	0	0	0	0	0	0	0	0	0	0	0	0	0	0	0	0	0	0	0	0	0	0	1	0	0	0	1	0	0	0	0	0	0	0	0	0	0	0	0	0	0	0	1
TCGA-55-7727-01	0	0	0	0	0	0	0	0	0	0	0	0	0	0	0	0	0	0	0	0	0	0	0	0	1	0	0	0	1	0	0	0	0	0	0	0	0	0	0	0	0	0	0	0	1
TCGA-55-7728-01	0	0	0	0	0	0	0	0	0	0	0	0	0	0	0	0	0	0	0	0	0	0	0	0	1	0	0	0	1	0	0	0	0	0	0	0	0	0	0	0	0	0	0	0	1
TCGA-55-7903-01	0	0	0	0	0	0	0	0	0	0	0	0	0	0	0	0	0	0	0	0	0	0	0	0	1	0	0	0	1	0	0	0	0	0	0	0	0	0	0	0	0	0	0	0	1
TCGA-55-7914-01	0	0	0	0	0	0	0	0	0	0	0	0	0	0	0	0	0	0	0	0	0	0	0	0	1	0	0	0	1	0	0	0	0	0	0	0	0	0	0	0	0	0	0	0	1
TCGA-55-8085-01	0	0	0	0	0	0	0	0	0	0	0	0	0	0	0	0	0	0	0	0	0	0	0	0	1	0	0	0	1	0	0	0	0	0	0	0	0	0	0	0	0	0	0	0	1
TCGA-55-8087-01	0	0	0	0	0	0	0	0	0	0	0	0	0	0	0	0	0	0	0	0	0	0	0	0	1	0	0	0	1	0	0	0	0	0	0	0	0	0	0	0	0	0	0	0	1
TCGA-55-8089-01	0	0	0	0	0	0	0	0	0	0	0	0	0	0	0	0	0	0	0	0	0	0	0	0	1	0	0	0	1	0	0	0	0	0	0	0	0	0	0	0	0	0	0	0	1
TCGA-55-8091-01	0	0	0	0	0	0	0	0	0	0	0	0	0	0	0	0	0	0	0	0	0	0	0	0	1	0	0	0	1	0	0	0	0	0	0	0	0	0	0	0	0	0	0	0	1
TCGA-55-8097-01	0	0	0	0	0	0	0	0	0	0	0	0	0	0	0	0	0	0	0	0	0	0	0	0	1	0	0	0	1	0	0	0	0	0	0	0	0	0	0	0	0	0	0	0	1
TCGA-55-8204-01	0	0	0	0	0	0	0	0	0	0	0	0	0	0	0	0	0	0	0	0	0	0	0	0	1	0	0	0	1	0	0	0	0	0	0	0	0	0	0	0	0	0	0	0	1
TCGA-55-8208-01	0	0	0	0	0	0	0	0	0	0	0	0	0	0	0	0	0	0	0	0	0	0	0	0	1	0	0	0	1	0	0	0	0	0	0	0	0	0	0	0	0	0	0	0	1
TCGA-55-8301-01	0	0	0	0	0	0	0	0	0	0	0	0	0	0	0	0	0	0	0	0	0	0	0	0	1	0	0	0	1	0	0	0	0	0	0	0	0	0	0	0	0	0	0	0	1
TCGA-55-8302-01	0	0	0	0	0	0	0	0	0	0	0	0	0	0	0	0	0	0	0	0	0	0	0	0	1	0	0	0	1	0	0	0	0	0	0	0	0	0	0	0	0	0	0	0	1
TCGA-55-8505-01	0	0	0	0	0	0	0	0	0	0	0	0	0	0	0	0	0	0	0	0	0	0	0	0	1	0	0	0	1	0	0	0	0	0	0	0	0	0	0	0	0	0	0	0	1
TCGA-55-8512-01	0	0	0	0	0	0	0	0	0	0	0	0	0	0	0	0	0	0	0	0	0	0	0	0	1	0	0	0	1	0	0	0	0	0	0	0	0	0	0	0	0	0	0	0	1
TCGA-55-8513-01	0	0	0	0	0	0	0	0	0	0	0	0	0	0	0	0	0	0	0	0	0	0	0	0	1	0	0	0	1	0	0	0	0	0	0	0	0	0	0	0	0	0	0	0	1
TCGA-55-8619-01	0	0	0	0	0	0	0	0	0	0	0	0	0	0	0	0	0	0	0	0	0	0	0	0	1	0	0	0	1	0	0	0	0	0	0	0	0	0	0	0	0	0	0	0	1
TCGA-55-8621-01	0	0	0	0	0	0	0	0	0	0	0	0	0	0	0	0	0	0	0	0	0	0	0	0	1	0	0	0	1	0	0	0	0	0	0	0	0	0	0	0	0	0	0	0	1
TCGA-55-A48X-01	0	0	0	0	0	0	0	0	0	0	0	0	0	0	0	0	0	0	0	0	0	0	0	0	1	0	0	0	1	0	0	0	0	0	0	0	0	0	0	0	0	0	0	0	1
TCGA-55-A48Y-01	0	0	0	0	0	0	0	0	0	0	0	0	0	0	0	0	0	0	0	0	0	0	0	0	1	0	0	0	1	0	0	0	0	0	0	0	0	0	0	0	0	0	0	0	1
TCGA-55-A493-01	0	0	0	0	0	0	0	0	0	0	0	0	0	0	0	0	0	0	0	0	0	0	0	0	1	0	0	0	1	0	0	0	0	0	0	0	0	0	0	0	0	0	0	0	1
TCGA-55-A57B-01	0	0	0	0	0	0	0	0	0	0	0	0	0	0	0	0	0	0	0	0	0	0	0	0	1	0	0	0	1	0	0	0	0	0	0	0	0	0	0	0	0	0	0	0	1
TCGA-56-1622-01	0	0	0	0	0	0	0	0	0	0	0	0	0	0	0	0	0	0	0	0	1	0	0	1	1	0	0	0	0	0	0	0	0	0	0	0	0	0	0	0	0	0	0	0	1
TCGA-56-5897-01	0	0	0	0	0	0	0	0	0	0	0	0	0	0	0	0	0	0	0	0	1	0	0	1	1	0	0	0	0	0	0	0	0	0	0	0	0	0	0	0	0	0	0	0	1
TCGA-56-6546-01	0	0	0	0	0	0	0	0	0	0	0	0	0	0	0	0	0	0	0	0	1	0	0	1	1	0	0	0	0	0	0	0	0	0	0	0	0	0	0	0	0	0	0	0	1
TCGA-56-7221-01	0	0	0	0	0	0	0	0	0	0	0	0	0	0	0	0	0	0	0	0	1	0	0	1	1	0	0	0	0	0	0	0	0	0	0	0	0	0	0	0	0	0	0	0	1
TCGA-56-7579-01	0	0	0	0	0	0	0	0	0	0	0	0	0	0	0	0	0	0	0	0	1	0	0	1	1	0	0	0	0	0	0	0	0	0	0	0	0	0	0	0	0	0	0	0	1
TCGA-56-7731-01	0	0	0	0	0	0	0	0	0	0	0	0	0	0	0	0	0	0	0	0	1	0	0	1	1	0	0	0	0	0	0	0	0	0	0	0	0	0	0	0	0	0	0	0	1
TCGA-56-7823-01	0	0	0	0	0	0	0	0	0	0	0	0	0	0	0	0	0	0	0	0	1	0	0	1	1	0	0	0	0	0	0	0	0	0	0	0	0	0	0	0	0	0	0	0	1
TCGA-56-8082-01	0	0	0	0	0	0	0	0	0	0	0	0	0	0	0	0	0	0	0	0	1	0	0	1	1	0	0	0	0	0	0	0	0	0	0	0	0	0	0	0	0	0	0	0	1
TCGA-56-8083-01	0	0	0	0	0	0	0	0	0	0	0	0	0	0	0	0	0	0	0	0	1	0	0	1	1	0	0	0	0	0	0	0	0	0	0	0	0	0	0	0	0	0	0	0	1
TCGA-56-8304-01	0	0	0	0	0	0	0	0	0	0	0	0	0	0	0	0	0	0	0	0	1	0	0	1	1	0	0	0	0	0	0	0	0	0	0	0	0	0	0	0	0	0	0	0	1
TCGA-56-8309-01	0	0	0	0	0	0	0	0	0	0	0	0	0	0	0	0	0	0	0	0	1	0	0	1	1	0	0	0	0	0	0	0	0	0	0	0	0	0	0	0	0	0	0	0	1
TCGA-56-8503-01	0	0	0	0	0	0	0	0	0	0	0	0	0	0	0	0	0	0	0	0	1	0	0	1	1	0	0	0	0	0	0	0	0	0	0	0	0	0	0	0	0	0	0	0	1
TCGA-56-8622-01	0	0	0	0	0	0	0	0	0	0	0	0	0	0	0	0	0	0	0	0	1	0	0	1	1	0	0	0	0	0	0	0	0	0	0	0	0	0	0	0	0	0	0	0	1
TCGA-56-8623-01	0	0	0	0	0	0	0	0	0	0	0	0	0	0	0	0	0	0	0	0	1	0	0	1	1	0	0	0	0	0	0	0	0	0	0	0	0	0	0	0	0	0	0	0	1
TCGA-56-8625-01	0	0	0	0	0	0	0	0	0	0	0	0	0	0	0	0	0	0	0	0	1	0	0	1	1	0	0	0	0	0	0	0	0	0	0	0	0	0	0	0	0	0	0	0	1
TCGA-56-8626-01	0	0	0	0	0	0	0	0	0	0	0	0	0	0	0	0	0	0	0	0	1	0	0	1	1	0	0	0	0	0	0	0	0	0	0	0	0	0	0	0	0	0	0	0	1
TCGA-56-8628-01	0	0	0	0	0	0	0	0	0	0	0	0	0	0	0	0	0	0	0	0	1	0	0	1	1	0	0	0	0	0	0	0	0	0	0	0	0	0	0	0	0	0	0	0	1
TCGA-56-A49D-01	0	0	0	0	0	0	0	0	0	0	0	0	0	0	0	0	0	0	0	0	1	0	0	1	1	0	0	0	0	0	0	0	0	0	0	0	0	0	0	0	0	0	0	0	1
TCGA-56-A4BW-01	0	0	0	0	0	0	0	0	0	0	0	0	0	0	0	0	0	0	0	0	1	0	0	1	1	0	0	0	0	0	0	0	0	0	0	0	0	0	0	0	0	0	0	0	1
TCGA-56-A4ZJ-01	0	0	0	0	0	0	0	0	0	0	0	0	0	0	0	0	0	0	0	0	1	0	0	1	1	0	0	0	0	0	0	0	0	0	0	0	0	0	0	0	0	0	0	0	1
TCGA-56-A5DS-01	0	0	0	0	0	0	0	0	0	0	0	0	0	0	0	0	0	0	0	0	1	0	0	1	1	0	0	0	0	0	0	0	0	0	0	0	0	0	0	0	0	0	0	0	1
TCGA-57-1584-01	0	0	0	0	0	0	0	0	0	0	0	0	0	0	0	0	0	0	0	0	0	0	0	0	1	0	0	0	0	0	0	0	0	1	0	0	0	0	0	0	0	0	0	0	1
TCGA-57-1992-01	0	0	0	0	0	0	0	0	0	0	0	0	0	0	0	0	0	0	0	0	0	0	0	0	1	0	0	0	0	0	0	0	0	1	0	0	0	0	0	0	0	0	0	0	1
TCGA-58-8387-01	0	0	0	0	0	0	0	0	0	0	0	0	0	0	0	0	0	0	0	0	1	0	0	1	1	0	0	0	0	0	0	0	0	0	0	0	0	0	0	0	0	0	0	0	1
TCGA-58-8388-01	0	0	0	0	0	0	0	0	0	0	0	0	0	0	0	0	0	0	0	0	1	0	0	1	1	0	0	0	0	0	0	0	0	0	0	0	0	0	0	0	0	0	0	0	1
TCGA-58-8390-01	0	0	0	0	0	0	0	0	0	0	0	0	0	0	0	0	0	0	0	0	1	0	0	1	1	0	0	0	0	0	0	0	0	0	0	0	0	0	0	0	0	0	0	0	1
TCGA-58-A46K-01	0	0	0	0	0	0	0	0	0	0	0	0	0	0	0	0	0	0	0	0	1	0	0	1	1	0	0	0	0	0	0	0	0	0	0	0	0	0	0	0	0	0	0	0	1
TCGA-58-A46L-01	0	0	0	0	0	0	0	0	0	0	0	0	0	0	0	0	0	0	0	0	1	0	0	1	1	0	0	0	0	0	0	0	0	0	0	0	0	0	0	0	0	0	0	0	1
TCGA-58-A46N-01	0	0	0	0	0	0	0	0	0	0	0	0	0	0	0	0	0	0	0	0	1	0	0	1	1	0	0	0	0	0	0	0	0	0	0	0	0	0	0	0	0	0	0	0	1
TCGA-59-2350-01	0	0	0	0	0	0	0	0	0	0	0	0	0	0	0	0	0	0	0	0	0	0	0	0	1	0	0	0	0	0	0	0	0	1	0	0	0	0	0	0	0	0	0	0	1
TCGA-59-2354-01	0	0	0	0	0	0	0	0	0	0	0	0	0	0	0	0	0	0	0	0	0	0	0	0	1	0	0	0	0	0	0	0	0	1	0	0	0	0	0	0	0	0	0	0	1
TCGA-59-2355-01	0	0	0	0	0	0	0	0	0	0	0	0	0	0	0	0	0	0	0	0	0	0	0	0	1	0	0	0	0	0	0	0	0	1	0	0	0	0	0	0	0	0	0	0	1
TCGA-59-2363-01	0	0	0	0	0	0	0	0	0	0	0	0	0	0	0	0	0	0	0	0	0	0	0	0	1	0	0	0	0	0	0	0	0	1	0	0	0	0	0	0	0	0	0	0	1
TCGA-5C-A9VH-01	0	0	0	0	0	0	0	0	0	0	0	0	0	0	0	0	0	0	0	0	0	0	0	0	1	0	0	0	0	0	0	0	0	0	0	0	0	0	0	1	0	0	0	0	1
TCGA-5C-AAPD-01	0	0	0	0	0	0	0	0	0	0	0	0	0	0	0	0	0	0	0	0	0	0	0	0	1	0	0	0	0	0	0	0	0	0	0	0	0	0	0	1	0	0	0	0	1
TCGA-5G-A9ZZ-01	0	0	0	0	0	0	0	0	1	0	0	0	0	0	0	0	0	0	0	0	0	0	0	0	1	0	0	0	0	0	0	0	0	0	0	0	0	0	0	0	0	0	0	0	1
TCGA-5K-AAAP-01	0	0	0	0	0	0	0	0	1	0	0	0	0	0	0	0	0	0	0	0	0	0	0	0	1	0	0	0	0	0	0	0	0	0	0	0	0	0	0	0	0	0	0	0	1
TCGA-5L-AAT0-01	0	0	0	0	0	0	0	0	0	0	0	1	0	0	0	0	0	0	0	0	0	0	0	0	1	0	0	0	0	0	0	0	0	0	0	0	0	0	0	0	0	0	0	0	1
TCGA-5M-AAT5-01	0	0	0	0	0	0	0	0	0	0	0	0	0	0	0	0	0	0	0	0	0	0	0	0	1	0	0	0	0	0	0	0	1	0	0	0	0	0	0	0	0	0	1	0	1
TCGA-5M-AAT6-01	0	0	0	0	0	0	0	0	0	0	0	0	0	0	0	0	0	0	0	0	0	0	0	0	1	0	0	0	0	0	0	0	1	0	0	0	0	0	0	0	0	0	1	0	1
TCGA-5N-A9KM-01	0	0	0	0	0	0	0	0	0	0	0	0	0	0	0	0	0	0	0	0	0	0	1	0	1	0	0	0	0	0	0	0	0	0	0	0	0	0	0	0	0	0	0	0	1
TCGA-5P-A9JU-01	0	0	0	0	0	0	0	0	0	0	0	0	0	1	0	0	0	0	0	0	0	0	0	0	1	0	0	0	0	0	0	0	0	0	0	0	0	0	1	0	0	0	0	0	1
TCGA-5P-A9JV-01	0	0	0	0	0	0	0	0	0	0	0	0	0	1	0	0	0	0	0	0	0	0	0	0	1	0	0	0	0	0	0	0	0	0	0	0	0	0	1	0	0	0	0	0	1
TCGA-5P-A9JW-01	0	0	0	0	0	0	0	0	0	0	0	0	0	1	0	0	0	0	0	0	0	0	0	0	1	0	0	0	0	0	0	0	0	0	0	0	0	0	1	0	0	0	0	0	1
TCGA-5P-A9JY-01	0	0	0	0	0	0	0	0	0	0	0	0	0	1	0	0	0	0	0	0	0	0	0	0	1	0	0	0	0	0	0	0	0	0	0	0	0	0	1	0	0	0	0	0	1
TCGA-5P-A9JZ-01	0	0	0	0	0	0	0	0	0	0	0	0	0	1	0	0	0	0	0	0	0	0	0	0	1	0	0	0	0	0	0	0	0	0	0	0	0	0	1	0	0	0	0	0	1
TCGA-5P-A9K0-01	0	0	0	0	0	0	0	0	0	0	0	0	0	1	0	0	0	0	0	0	0	0	0	0	1	0	0	0	0	0	0	0	0	0	0	0	0	0	1	0	0	0	0	0	1
TCGA-5P-A9K2-01	0	0	0	0	0	0	0	0	0	0	0	0	0	1	0	0	0	0	0	0	0	0	0	0	1	0	0	0	0	0	0	0	0	0	0	0	0	0	1	0	0	0	0	0	1
TCGA-5P-A9K3-01	0	0	0	0	0	0	0	0	0	0	0	0	0	1	0	0	0	0	0	0	0	0	0	0	1	0	0	0	0	0	0	0	0	0	0	0	0	0	1	0	0	0	0	0	1
TCGA-5P-A9K4-01	0	0	0	0	0	0	0	0	0	0	0	0	0	1	0	0	0	0	0	0	0	0	0	0	1	0	0	0	0	0	0	0	0	0	0	0	0	0	1	0	0	0	0	0	1
TCGA-5P-A9K6-01	0	0	0	0	0	0	0	0	0	0	0	0	0	1	0	0	0	0	0	0	0	0	0	0	1	0	0	0	0	0	0	0	0	0	0	0	0	0	1	0	0	0	0	0	1
TCGA-5P-A9K8-01	0	0	0	0	0	0	0	0	0	0	0	0	0	1	0	0	0	0	0	0	0	0	0	0	1	0	0	0	0	0	0	0	0	0	0	0	0	0	1	0	0	0	0	0	1
TCGA-5P-A9K9-01	0	0	0	0	0	0	0	0	0	0	0	0	0	1	0	0	0	0	0	0	0	0	0	0	1	0	0	0	0	0	0	0	0	0	0	0	0	0	1	0	0	0	0	0	1
TCGA-5P-A9KA-01	0	0	0	0	0	0	0	0	0	0	0	0	0	1	0	0	0	0	0	0	0	0	0	0	1	0	0	0	0	0	0	0	0	0	0	0	0	0	1	0	0	0	0	0	1
TCGA-5P-A9KC-01	0	0	0	0	0	0	0	0	0	0	0	0	0	1	0	0	0	0	0	0	0	0	0	0	1	0	0	0	0	0	0	0	0	0	0	0	0	0	1	0	0	0	0	0	1
TCGA-5P-A9KE-01	0	0	0	0	0	0	0	0	0	0	0	0	0	1	0	0	0	0	0	0	0	0	0	0	1	0	0	0	0	0	0	0	0	0	0	0	0	0	1	0	0	0	0	0	1
TCGA-5P-A9KH-01	0	0	0	0	0	0	0	0	0	0	0	0	0	1	0	0	0	0	0	0	0	0	0	0	1	0	0	0	0	0	0	0	0	0	0	0	0	0	1	0	0	0	0	0	1
TCGA-5R-AA1C-01	0	0	0	0	0	0	0	0	0	0	0	0	0	0	0	0	0	0	0	0	0	0	0	0	1	0	0	0	0	0	0	0	0	0	0	0	0	0	0	1	0	0	0	0	1
TCGA-5R-AA1D-01	0	0	0	0	0	0	0	0	0	0	0	0	0	0	0	0	0	0	0	0	0	0	0	0	1	0	0	0	0	0	0	0	0	0	0	0	0	0	0	1	0	0	0	0	1
TCGA-5R-AAAM-01	0	0	0	0	0	0	0	0	0	0	0	0	0	0	0	0	0	0	0	0	0	0	0	0	1	0	0	0	0	0	0	0	0	0	0	0	0	0	0	1	0	0	0	0	1
TCGA-5S-A9Q8-01	0	0	0	0	0	0	0	0	0	0	0	0	0	0	0	0	0	0	0	0	0	0	0	0	1	0	0	0	0	0	1	0	0	0	0	0	0	0	0	0	0	0	0	0	1
TCGA-5U-AB0F-01	0	0	0	0	0	0	0	0	1	0	0	0	0	0	0	0	0	0	0	0	0	0	0	0	1	0	0	0	0	0	0	0	0	0	0	0	0	0	0	0	0	0	0	0	1
TCGA-5V-A9RR-01	0	0	0	0	0	0	0	0	1	0	0	0	0	0	0	0	0	0	0	0	0	0	0	0	1	0	0	0	0	0	0	0	0	0	0	0	0	0	0	0	0	0	0	0	1
TCGA-60-2697-01	0	0	0	0	0	0	0	0	0	0	0	0	0	0	0	0	0	0	0	0	1	0	0	1	1	0	0	0	0	0	0	0	0	0	0	0	0	0	0	0	0	0	0	0	1
TCGA-60-2707-01	0	0	0	0	0	0	0	0	0	0	0	0	0	0	0	0	0	0	0	0	1	0	0	1	1	0	0	0	0	0	0	0	0	0	0	0	0	0	0	0	0	0	0	0	1
TCGA-60-2710-01	0	0	0	0	0	0	0	0	0	0	0	0	0	0	0	0	0	0	0	0	1	0	0	1	1	0	0	0	0	0	0	0	0	0	0	0	0	0	0	0	0	0	0	0	1
TCGA-60-2713-01	0	0	0	0	0	0	0	0	0	0	0	0	0	0	0	0	0	0	0	0	1	0	0	1	1	0	0	0	0	0	0	0	0	0	0	0	0	0	0	0	0	0	0	0	1
TCGA-60-2716-01	0	0	0	0	0	0	0	0	0	0	0	0	0	0	0	0	0	0	0	0	1	0	0	1	1	0	0	0	0	0	0	0	0	0	0	0	0	0	0	0	0	0	0	0	1
TCGA-60-2719-01	0	0	0	0	0	0	0	0	0	0	0	0	0	0	0	0	0	0	0	0	1	0	0	1	1	0	0	0	0	0	0	0	0	0	0	0	0	0	0	0	0	0	0	0	1
TCGA-60-2720-01	0	0	0	0	0	0	0	0	0	0	0	0	0	0	0	0	0	0	0	0	1	0	0	1	1	0	0	0	0	0	0	0	0	0	0	0	0	0	0	0	0	0	0	0	1
TCGA-60-2721-01	0	0	0	0	0	0	0	0	0	0	0	0	0	0	0	0	0	0	0	0	1	0	0	1	1	0	0	0	0	0	0	0	0	0	0	0	0	0	0	0	0	0	0	0	1
TCGA-60-2724-01	0	0	0	0	0	0	0	0	0	0	0	0	0	0	0	0	0	0	0	0	1	0	0	1	1	0	0	0	0	0	0	0	0	0	0	0	0	0	0	0	0	0	0	0	1
TCGA-60-2725-01	0	0	0	0	0	0	0	0	0	0	0	0	0	0	0	0	0	0	0	0	1	0	0	1	1	0	0	0	0	0	0	0	0	0	0	0	0	0	0	0	0	0	0	0	1
TCGA-61-1724-01	0	0	0	0	0	0	0	0	0	0	0	0	0	0	0	0	0	0	0	0	0	0	0	0	1	0	0	0	0	0	0	0	0	1	0	0	0	0	0	0	0	0	0	0	1
TCGA-61-1725-01	0	0	0	0	0	0	0	0	0	0	0	0	0	0	0	0	0	0	0	0	0	0	0	0	1	0	0	0	0	0	0	0	0	1	0	0	0	0	0	0	0	0	0	0	1
TCGA-61-1734-01	0	0	0	0	0	0	0	0	0	0	0	0	0	0	0	0	0	0	0	0	0	0	0	0	1	0	0	0	0	0	0	0	0	1	0	0	0	0	0	0	0	0	0	0	1
TCGA-61-1736-01	0	0	0	0	0	0	0	0	0	0	0	0	0	0	0	0	0	0	0	0	0	0	0	0	1	0	0	0	0	0	0	0	0	1	0	0	0	0	0	0	0	0	0	0	1
TCGA-61-1737-01	0	0	0	0	0	0	0	0	0	0	0	0	0	0	0	0	0	0	0	0	0	0	0	0	1	0	0	0	0	0	0	0	0	1	0	0	0	0	0	0	0	0	0	0	1
TCGA-61-1738-01	0	0	0	0	0	0	0	0	0	0	0	0	0	0	0	0	0	0	0	0	0	0	0	0	1	0	0	0	0	0	0	0	0	1	0	0	0	0	0	0	0	0	0	0	1
TCGA-61-1740-01	0	0	0	0	0	0	0	0	0	0	0	0	0	0	0	0	0	0	0	0	0	0	0	0	1	0	0	0	0	0	0	0	0	1	0	0	0	0	0	0	0	0	0	0	1
TCGA-61-1895-01	0	0	0	0	0	0	0	0	0	0	0	0	0	0	0	0	0	0	0	0	0	0	0	0	1	0	0	0	0	0	0	0	0	1	0	0	0	0	0	0	0	0	0	0	1
TCGA-61-1900-01	0	0	0	0	0	0	0	0	0	0	0	0	0	0	0	0	0	0	0	0	0	0	0	0	1	0	0	0	0	0	0	0	0	1	0	0	0	0	0	0	0	0	0	0	1
TCGA-61-1901-01	0	0	0	0	0	0	0	0	0	0	0	0	0	0	0	0	0	0	0	0	0	0	0	0	1	0	0	0	0	0	0	0	0	1	0	0	0	0	0	0	0	0	0	0	1
TCGA-61-1903-01	0	0	0	0	0	0	0	0	0	0	0	0	0	0	0	0	0	0	0	0	0	0	0	0	1	0	0	0	0	0	0	0	0	1	0	0	0	0	0	0	0	0	0	0	1
TCGA-61-1910-01	0	0	0	0	0	0	0	0	0	0	0	0	0	0	0	0	0	0	0	0	0	0	0	0	1	0	0	0	0	0	0	0	0	1	0	0	0	0	0	0	0	0	0	0	1
TCGA-61-1913-01	0	0	0	0	0	0	0	0	0	0	0	0	0	0	0	0	0	0	0	0	0	0	0	0	1	0	0	0	0	0	0	0	0	1	0	0	0	0	0	0	0	0	0	0	1
TCGA-61-1914-01	0	0	0	0	0	0	0	0	0	0	0	0	0	0	0	0	0	0	0	0	0	0	0	0	1	0	0	0	0	0	0	0	0	1	0	0	0	0	0	0	0	0	0	0	1
TCGA-61-1995-01	0	0	0	0	0	0	0	0	0	0	0	0	0	0	0	0	0	0	0	0	0	0	0	0	1	0	0	0	0	0	0	0	0	1	0	0	0	0	0	0	0	0	0	0	1
TCGA-61-1998-01	0	0	0	0	0	0	0	0	0	0	0	0	0	0	0	0	0	0	0	0	0	0	0	0	1	0	0	0	0	0	0	0	0	1	0	0	0	0	0	0	0	0	0	0	1
TCGA-61-2000-01	0	0	0	0	0	0	0	0	0	0	0	0	0	0	0	0	0	0	0	0	0	0	0	0	1	0	0	0	0	0	0	0	0	1	0	0	0	0	0	0	0	0	0	0	1
TCGA-61-2002-01	0	0	0	0	0	0	0	0	0	0	0	0	0	0	0	0	0	0	0	0	0	0	0	0	1	0	0	0	0	0	0	0	0	1	0	0	0	0	0	0	0	0	0	0	1
TCGA-61-2016-01	0	0	0	0	0	0	0	0	0	0	0	0	0	0	0	0	0	0	0	0	0	0	0	0	1	0	0	0	0	0	0	0	0	1	0	0	0	0	0	0	0	0	0	0	1
TCGA-61-2017-01	0	0	0	0	0	0	0	0	0	0	0	0	0	0	0	0	0	0	0	0	0	0	0	0	1	0	0	0	0	0	0	0	0	1	0	0	0	0	0	0	0	0	0	0	1
TCGA-61-2018-01	0	0	0	0	0	0	0	0	0	0	0	0	0	0	0	0	0	0	0	0	0	0	0	0	1	0	0	0	0	0	0	0	0	1	0	0	0	0	0	0	0	0	0	0	1
TCGA-61-2087-01	0	0	0	0	0	0	0	0	0	0	0	0	0	0	0	0	0	0	0	0	0	0	0	0	1	0	0	0	0	0	0	0	0	1	0	0	0	0	0	0	0	0	0	0	1
TCGA-61-2092-01	0	0	0	0	0	0	0	0	0	0	0	0	0	0	0	0	0	0	0	0	0	0	0	0	1	0	0	0	0	0	0	0	0	1	0	0	0	0	0	0	0	0	0	0	1
TCGA-61-2094-01	0	0	0	0	0	0	0	0	0	0	0	0	0	0	0	0	0	0	0	0	0	0	0	0	1	0	0	0	0	0	0	0	0	1	0	0	0	0	0	0	0	0	0	0	1
TCGA-61-2095-01	0	0	0	0	0	0	0	0	0	0	0	0	0	0	0	0	0	0	0	0	0	0	0	0	1	0	0	0	0	0	0	0	0	1	0	0	0	0	0	0	0	0	0	0	1
TCGA-61-2096-01	0	0	0	0	0	0	0	0	0	0	0	0	0	0	0	0	0	0	0	0	0	0	0	0	1	0	0	0	0	0	0	0	0	1	0	0	0	0	0	0	0	0	0	0	1
TCGA-61-2109-01	0	0	0	0	0	0	0	0	0	0	0	0	0	0	0	0	0	0	0	0	0	0	0	0	1	0	0	0	0	0	0	0	0	1	0	0	0	0	0	0	0	0	0	0	1
TCGA-61-2110-01	0	0	0	0	0	0	0	0	0	0	0	0	0	0	0	0	0	0	0	0	0	0	0	0	1	0	0	0	0	0	0	0	0	1	0	0	0	0	0	0	0	0	0	0	1
TCGA-61-2610-02	0	0	0	0	0	0	0	0	0	0	0	0	0	0	0	0	0	0	0	0	0	0	0	0	1	0	0	0	0	0	0	0	0	1	0	0	0	0	0	0	0	0	0	0	1
TCGA-61-2613-01	0	0	0	0	0	0	0	0	0	0	0	0	0	0	0	0	0	0	0	0	0	0	0	0	1	0	0	0	0	0	0	0	0	1	0	0	0	0	0	0	0	0	0	0	1
TCGA-62-8395-01	0	0	0	0	0	0	0	0	0	0	0	0	0	0	0	0	0	0	0	0	0	0	0	0	1	0	0	0	1	0	0	0	0	0	0	0	0	0	0	0	0	0	0	0	1
TCGA-62-A46P-01	0	0	0	0	0	0	0	0	0	0	0	0	0	0	0	0	0	0	0	0	0	0	0	0	1	0	0	0	1	0	0	0	0	0	0	0	0	0	0	0	0	0	0	0	1
TCGA-62-A46V-01	0	0	0	0	0	0	0	0	0	0	0	0	0	0	0	0	0	0	0	0	0	0	0	0	1	0	0	0	1	0	0	0	0	0	0	0	0	0	0	0	0	0	0	0	1
TCGA-62-A46Y-01	0	0	0	0	0	0	0	0	0	0	0	0	0	0	0	0	0	0	0	0	0	0	0	0	1	0	0	0	1	0	0	0	0	0	0	0	0	0	0	0	0	0	0	0	1
TCGA-63-7021-01	0	0	0	0	0	0	0	0	0	0	0	0	0	0	0	0	0	0	0	0	1	0	0	1	1	0	0	0	0	0	0	0	0	0	0	0	0	0	0	0	0	0	0	0	1
TCGA-63-7022-01	0	0	0	0	0	0	0	0	0	0	0	0	0	0	0	0	0	0	0	0	1	0	0	1	1	0	0	0	0	0	0	0	0	0	0	0	0	0	0	0	0	0	0	0	1
TCGA-63-7023-01	0	0	0	0	0	0	0	0	0	0	0	0	0	0	0	0	0	0	0	0	1	0	0	1	1	0	0	0	0	0	0	0	0	0	0	0	0	0	0	0	0	0	0	0	1
TCGA-63-A5MG-01	0	0	0	0	0	0	0	0	0	0	0	0	0	0	0	0	0	0	0	0	1	0	0	1	1	0	0	0	0	0	0	0	0	0	0	0	0	0	0	0	0	0	0	0	1
TCGA-63-A5MH-01	0	0	0	0	0	0	0	0	0	0	0	0	0	0	0	0	0	0	0	0	1	0	0	1	1	0	0	0	0	0	0	0	0	0	0	0	0	0	0	0	0	0	0	0	1
TCGA-63-A5MM-01	0	0	0	0	0	0	0	0	0	0	0	0	0	0	0	0	0	0	0	0	1	0	0	1	1	0	0	0	0	0	0	0	0	0	0	0	0	0	0	0	0	0	0	0	1
TCGA-63-A5MN-01	0	0	0	0	0	0	0	0	0	0	0	0	0	0	0	0	0	0	0	0	1	0	0	1	1	0	0	0	0	0	0	0	0	0	0	0	0	0	0	0	0	0	0	0	1
TCGA-63-A5MT-01	0	0	0	0	0	0	0	0	0	0	0	0	0	0	0	0	0	0	0	0	1	0	0	1	1	0	0	0	0	0	0	0	0	0	0	0	0	0	0	0	0	0	0	0	1
TCGA-63-A5MV-01	0	0	0	0	0	0	0	0	0	0	0	0	0	0	0	0	0	0	0	0	1	0	0	1	1	0	0	0	0	0	0	0	0	0	0	0	0	0	0	0	0	0	0	0	1
TCGA-63-A5MY-01	0	0	0	0	0	0	0	0	0	0	0	0	0	0	0	0	0	0	0	0	1	0	0	1	1	0	0	0	0	0	0	0	0	0	0	0	0	0	0	0	0	0	0	0	1
TCGA-64-1676-01	0	0	0	0	0	0	0	0	0	0	0	0	0	0	0	0	0	0	0	0	0	0	0	0	1	0	0	0	1	0	0	0	0	0	0	0	0	0	0	0	0	0	0	0	1
TCGA-64-5778-01	0	0	0	0	0	0	0	0	0	0	0	0	0	0	0	0	0	0	0	0	0	0	0	0	1	0	0	0	1	0	0	0	0	0	0	0	0	0	0	0	0	0	0	0	1
TCGA-64-5781-01	0	0	0	0	0	0	0	0	0	0	0	0	0	0	0	0	0	0	0	0	0	0	0	0	1	0	0	0	1	0	0	0	0	0	0	0	0	0	0	0	0	0	0	0	1
TCGA-64-5815-01	0	0	0	0	0	0	0	0	0	0	0	0	0	0	0	0	0	0	0	0	0	0	0	0	1	0	0	0	1	0	0	0	0	0	0	0	0	0	0	0	0	0	0	0	1
TCGA-66-2734-01	0	0	0	0	0	0	0	0	0	0	0	0	0	0	0	0	0	0	0	0	1	0	0	1	1	0	0	0	0	0	0	0	0	0	0	0	0	0	0	0	0	0	0	0	1
TCGA-66-2737-01	0	0	0	0	0	0	0	0	0	0	0	0	0	0	0	0	0	0	0	0	1	0	0	1	1	0	0	0	0	0	0	0	0	0	0	0	0	0	0	0	0	0	0	0	1
TCGA-66-2757-01	0	0	0	0	0	0	0	0	0	0	0	0	0	0	0	0	0	0	0	0	1	0	0	1	1	0	0	0	0	0	0	0	0	0	0	0	0	0	0	0	0	0	0	0	1
TCGA-66-2763-01	0	0	0	0	0	0	0	0	0	0	0	0	0	0	0	0	0	0	0	0	1	0	0	1	1	0	0	0	0	0	0	0	0	0	0	0	0	0	0	0	0	0	0	0	1
TCGA-66-2765-01	0	0	0	0	0	0	0	0	0	0	0	0	0	0	0	0	0	0	0	0	1	0	0	1	1	0	0	0	0	0	0	0	0	0	0	0	0	0	0	0	0	0	0	0	1
TCGA-66-2768-01	0	0	0	0	0	0	0	0	0	0	0	0	0	0	0	0	0	0	0	0	1	0	0	1	1	0	0	0	0	0	0	0	0	0	0	0	0	0	0	0	0	0	0	0	1
TCGA-66-2770-01	0	0	0	0	0	0	0	0	0	0	0	0	0	0	0	0	0	0	0	0	1	0	0	1	1	0	0	0	0	0	0	0	0	0	0	0	0	0	0	0	0	0	0	0	1
TCGA-66-2771-01	0	0	0	0	0	0	0	0	0	0	0	0	0	0	0	0	0	0	0	0	1	0	0	1	1	0	0	0	0	0	0	0	0	0	0	0	0	0	0	0	0	0	0	0	1
TCGA-66-2778-01	0	0	0	0	0	0	0	0	0	0	0	0	0	0	0	0	0	0	0	0	1	0	0	1	1	0	0	0	0	0	0	0	0	0	0	0	0	0	0	0	0	0	0	0	1
TCGA-66-2780-01	0	0	0	0	0	0	0	0	0	0	0	0	0	0	0	0	0	0	0	0	1	0	0	1	1	0	0	0	0	0	0	0	0	0	0	0	0	0	0	0	0	0	0	0	1
TCGA-66-2782-01	0	0	0	0	0	0	0	0	0	0	0	0	0	0	0	0	0	0	0	0	1	0	0	1	1	0	0	0	0	0	0	0	0	0	0	0	0	0	0	0	0	0	0	0	1
TCGA-66-2783-01	0	0	0	0	0	0	0	0	0	0	0	0	0	0	0	0	0	0	0	0	1	0	0	1	1	0	0	0	0	0	0	0	0	0	0	0	0	0	0	0	0	0	0	0	1
TCGA-66-2786-01	0	0	0	0	0	0	0	0	0	0	0	0	0	0	0	0	0	0	0	0	1	0	0	1	1	0	0	0	0	0	0	0	0	0	0	0	0	0	0	0	0	0	0	0	1
TCGA-66-2788-01	0	0	0	0	0	0	0	0	0	0	0	0	0	0	0	0	0	0	0	0	1	0	0	1	1	0	0	0	0	0	0	0	0	0	0	0	0	0	0	0	0	0	0	0	1
TCGA-66-2789-01	0	0	0	0	0	0	0	0	0	0	0	0	0	0	0	0	0	0	0	0	1	0	0	1	1	0	0	0	0	0	0	0	0	0	0	0	0	0	0	0	0	0	0	0	1
TCGA-66-2790-01	0	0	0	0	0	0	0	0	0	0	0	0	0	0	0	0	0	0	0	0	1	0	0	1	1	0	0	0	0	0	0	0	0	0	0	0	0	0	0	0	0	0	0	0	1
TCGA-66-2791-01	0	0	0	0	0	0	0	0	0	0	0	0	0	0	0	0	0	0	0	0	1	0	0	1	1	0	0	0	0	0	0	0	0	0	0	0	0	0	0	0	0	0	0	0	1
TCGA-66-2794-01	0	0	0	0	0	0	0	0	0	0	0	0	0	0	0	0	0	0	0	0	1	0	0	1	1	0	0	0	0	0	0	0	0	0	0	0	0	0	0	0	0	0	0	0	1
TCGA-66-2795-01	0	0	0	0	0	0	0	0	0	0	0	0	0	0	0	0	0	0	0	0	1	0	0	1	1	0	0	0	0	0	0	0	0	0	0	0	0	0	0	0	0	0	0	0	1
TCGA-67-3770-01	0	0	0	0	0	0	0	0	0	0	0	0	0	0	0	0	0	0	0	0	0	0	0	0	1	0	0	0	1	0	0	0	0	0	0	0	0	0	0	0	0	0	0	0	1
TCGA-67-3772-01	0	0	0	0	0	0	0	0	0	0	0	0	0	0	0	0	0	0	0	0	0	0	0	0	1	0	0	0	1	0	0	0	0	0	0	0	0	0	0	0	0	0	0	0	1
TCGA-67-3773-01	0	0	0	0	0	0	0	0	0	0	0	0	0	0	0	0	0	0	0	0	0	0	0	0	1	0	0	0	1	0	0	0	0	0	0	0	0	0	0	0	0	0	0	0	1
TCGA-67-3774-01	0	0	0	0	0	0	0	0	0	0	0	0	0	0	0	0	0	0	0	0	0	0	0	0	1	0	0	0	1	0	0	0	0	0	0	0	0	0	0	0	0	0	0	0	1
TCGA-67-4679-01	0	0	0	0	0	0	0	0	0	0	0	0	0	0	0	0	0	0	0	0	0	0	0	0	1	0	0	0	1	0	0	0	0	0	0	0	0	0	0	0	0	0	0	0	1
TCGA-67-6215-01	0	0	0	0	0	0	0	0	0	0	0	0	0	0	0	0	0	0	0	0	0	0	0	0	1	0	0	0	1	0	0	0	0	0	0	0	0	0	0	0	0	0	0	0	1
TCGA-67-6216-01	0	0	0	0	0	0	0	0	0	0	0	0	0	0	0	0	0	0	0	0	0	0	0	0	1	0	0	0	1	0	0	0	0	0	0	0	0	0	0	0	0	0	0	0	1
TCGA-68-7756-01	0	0	0	0	0	0	0	0	0	0	0	0	0	0	0	0	0	0	0	0	1	0	0	1	1	0	0	0	0	0	0	0	0	0	0	0	0	0	0	0	0	0	0	0	1
TCGA-68-7757-01	0	0	0	0	0	0	0	0	0	0	0	0	0	0	0	0	0	0	0	0	1	0	0	1	1	0	0	0	0	0	0	0	0	0	0	0	0	0	0	0	0	0	0	0	1
TCGA-68-A59I-01	0	0	0	0	0	0	0	0	0	0	0	0	0	0	0	0	0	0	0	0	1	0	0	1	1	0	0	0	0	0	0	0	0	0	0	0	0	0	0	0	0	0	0	0	1
TCGA-69-7764-01	0	0	0	0	0	0	0	0	0	0	0	0	0	0	0	0	0	0	0	0	0	0	0	0	1	0	0	0	1	0	0	0	0	0	0	0	0	0	0	0	0	0	0	0	1
TCGA-69-7765-01	0	0	0	0	0	0	0	0	0	0	0	0	0	0	0	0	0	0	0	0	0	0	0	0	1	0	0	0	1	0	0	0	0	0	0	0	0	0	0	0	0	0	0	0	1
TCGA-69-8254-01	0	0	0	0	0	0	0	0	0	0	0	0	0	0	0	0	0	0	0	0	0	0	0	0	1	0	0	0	1	0	0	0	0	0	0	0	0	0	0	0	0	0	0	0	1
TCGA-6D-AA2E-01	0	0	0	0	0	0	0	0	0	0	0	0	0	1	0	0	0	0	0	0	0	1	0	0	1	0	0	0	0	0	0	0	0	0	0	0	0	0	0	0	0	0	0	0	1
TCGA-73-4658-01	0	0	0	0	0	0	0	0	0	0	0	0	0	0	0	0	0	0	0	0	0	0	0	0	1	0	0	0	1	0	0	0	0	0	0	0	0	0	0	0	0	0	0	0	1
TCGA-73-4676-01	0	0	0	0	0	0	0	0	0	0	0	0	0	0	0	0	0	0	0	0	0	0	0	0	1	0	0	0	1	0	0	0	0	0	0	0	0	0	0	0	0	0	0	0	1
TCGA-73-7498-01	0	0	0	0	0	0	0	0	0	0	0	0	0	0	0	0	0	0	0	0	0	0	0	0	1	0	0	0	1	0	0	0	0	0	0	0	0	0	0	0	0	0	0	0	1
TCGA-74-6573-01	1	0	0	0	0	0	0	0	0	0	0	0	0	0	0	0	0	0	0	0	0	0	0	0	1	0	0	0	0	0	0	0	0	0	1	0	0	0	0	0	0	0	0	0	1
TCGA-74-6575-01	1	0	0	0	0	0	0	0	0	0	0	0	0	0	0	0	0	0	0	0	0	0	0	0	1	0	0	0	0	0	0	0	0	0	1	0	0	0	0	0	0	0	0	0	1
TCGA-74-6577-01	1	0	0	0	0	0	0	0	0	0	0	0	0	0	0	0	0	0	0	0	0	0	0	0	1	0	0	0	0	0	0	0	0	0	1	0	0	0	0	0	0	0	0	0	1
TCGA-74-6578-01	1	0	0	0	0	0	0	0	0	0	0	0	0	0	0	0	0	0	0	0	0	0	0	0	1	0	0	0	0	0	0	0	0	0	1	0	0	0	0	0	0	0	0	0	1
TCGA-74-6581-01	1	0	0	0	0	0	0	0	0	0	0	0	0	0	0	0	0	0	0	0	0	0	0	0	1	0	0	0	0	0	0	0	0	0	1	0	0	0	0	0	0	0	0	0	1
TCGA-75-5122-01	0	0	0	0	0	0	0	0	0	0	0	0	0	0	0	0	0	0	0	0	0	0	0	0	1	0	0	0	1	0	0	0	0	0	0	0	0	0	0	0	0	0	0	0	1
TCGA-75-5126-01	0	0	0	0	0	0	0	0	0	0	0	0	0	0	0	0	0	0	0	0	0	0	0	0	1	0	0	0	1	0	0	0	0	0	0	0	0	0	0	0	0	0	0	0	1
TCGA-75-5146-01	0	0	0	0	0	0	0	0	0	0	0	0	0	0	0	0	0	0	0	0	0	0	0	0	1	0	0	0	1	0	0	0	0	0	0	0	0	0	0	0	0	0	0	0	1
TCGA-75-6203-01	0	0	0	0	0	0	0	0	0	0	0	0	0	0	0	0	0	0	0	0	0	0	0	0	1	0	0	0	1	0	0	0	0	0	0	0	0	0	0	0	0	0	0	0	1
TCGA-75-6205-01	0	0	0	0	0	0	0	0	0	0	0	0	0	0	0	0	0	0	0	0	0	0	0	0	1	0	0	0	1	0	0	0	0	0	0	0	0	0	0	0	0	0	0	0	1
TCGA-75-6207-01	0	0	0	0	0	0	0	0	0	0	0	0	0	0	0	0	0	0	0	0	0	0	0	0	1	0	0	0	1	0	0	0	0	0	0	0	0	0	0	0	0	0	0	0	1
TCGA-76-4925-01	1	0	0	0	0	0	0	0	0	0	0	0	0	0	0	0	0	0	0	0	0	0	0	0	1	0	0	0	0	0	0	0	0	0	1	0	0	0	0	0	0	0	0	0	1
TCGA-76-4926-01	1	0	0	0	0	0	0	0	0	0	0	0	0	0	0	0	0	0	0	0	0	0	0	0	1	0	0	0	0	0	0	0	0	0	1	0	0	0	0	0	0	0	0	0	1
TCGA-76-4931-01	1	0	0	0	0	0	0	0	0	0	0	0	0	0	0	0	0	0	0	0	0	0	0	0	1	0	0	0	0	0	0	0	0	0	1	0	0	0	0	0	0	0	0	0	1
TCGA-76-4935-01	1	0	0	0	0	0	0	0	0	0	0	0	0	0	0	0	0	0	0	0	0	0	0	0	1	0	0	0	0	0	0	0	0	0	1	0	0	0	0	0	0	0	0	0	1
TCGA-76-6191-01	1	0	0	0	0	0	0	0	0	0	0	0	0	0	0	0	0	0	0	0	0	0	0	0	1	0	0	0	0	0	0	0	0	0	1	0	0	0	0	0	0	0	0	0	1
TCGA-76-6192-01	1	0	0	0	0	0	0	0	0	0	0	0	0	0	0	0	0	0	0	0	0	0	0	0	1	0	0	0	0	0	0	0	0	0	1	0	0	0	0	0	0	0	0	0	1
TCGA-76-6193-01	1	0	0	0	0	0	0	0	0	0	0	0	0	0	0	0	0	0	0	0	0	0	0	0	1	0	0	0	0	0	0	0	0	0	1	0	0	0	0	0	0	0	0	0	1
TCGA-76-6280-01	1	0	0	0	0	0	0	0	0	0	0	0	0	0	0	0	0	0	0	0	0	0	0	0	1	0	0	0	0	0	0	0	0	0	1	0	0	0	0	0	0	0	0	0	1
TCGA-76-6282-01	1	0	0	0	0	0	0	0	0	0	0	0	0	0	0	0	0	0	0	0	0	0	0	0	1	0	0	0	0	0	0	0	0	0	1	0	0	0	0	0	0	0	0	0	1
TCGA-76-6283-01	1	0	0	0	0	0	0	0	0	0	0	0	0	0	0	0	0	0	0	0	0	0	0	0	1	0	0	0	0	0	0	0	0	0	1	0	0	0	0	0	0	0	0	0	1
TCGA-76-6285-01	1	0	0	0	0	0	0	0	0	0	0	0	0	0	0	0	0	0	0	0	0	0	0	0	1	0	0	0	0	0	0	0	0	0	1	0	0	0	0	0	0	0	0	0	1
TCGA-76-6286-01	1	0	0	0	0	0	0	0	0	0	0	0	0	0	0	0	0	0	0	0	0	0	0	0	1	0	0	0	0	0	0	0	0	0	1	0	0	0	0	0	0	0	0	0	1
TCGA-76-6656-01	1	0	0	0	0	0	0	0	0	0	0	0	0	0	0	0	0	0	0	0	0	0	0	0	1	0	0	0	0	0	0	0	0	0	1	0	0	0	0	0	0	0	0	0	1
TCGA-76-6657-01	1	0	0	0	0	0	0	0	0	0	0	0	0	0	0	0	0	0	0	0	0	0	0	0	1	0	0	0	0	0	0	0	0	0	1	0	0	0	0	0	0	0	0	0	1
TCGA-76-6661-01	1	0	0	0	0	0	0	0	0	0	0	0	0	0	0	0	0	0	0	0	0	0	0	0	1	0	0	0	0	0	0	0	0	0	1	0	0	0	0	0	0	0	0	0	1
TCGA-76-6662-01	1	0	0	0	0	0	0	0	0	0	0	0	0	0	0	0	0	0	0	0	0	0	0	0	1	0	0	0	0	0	0	0	0	0	1	0	0	0	0	0	0	0	0	0	1
TCGA-76-6663-01	1	0	0	0	0	0	0	0	0	0	0	0	0	0	0	0	0	0	0	0	0	0	0	0	1	0	0	0	0	0	0	0	0	0	1	0	0	0	0	0	0	0	0	0	1
TCGA-76-6664-01	1	0	0	0	0	0	0	0	0	0	0	0	0	0	0	0	0	0	0	0	0	0	0	0	1	0	0	0	0	0	0	0	0	0	1	0	0	0	0	0	0	0	0	0	1
TCGA-77-6843-01	0	0	0	0	0	0	0	0	0	0	0	0	0	0	0	0	0	0	0	0	1	0	0	1	1	0	0	0	0	0	0	0	0	0	0	0	0	0	0	0	0	0	0	0	1
TCGA-77-6844-01	0	0	0	0	0	0	0	0	0	0	0	0	0	0	0	0	0	0	0	0	1	0	0	1	1	0	0	0	0	0	0	0	0	0	0	0	0	0	0	0	0	0	0	0	1
TCGA-77-7335-01	0	0	0	0	0	0	0	0	0	0	0	0	0	0	0	0	0	0	0	0	1	0	0	1	1	0	0	0	0	0	0	0	0	0	0	0	0	0	0	0	0	0	0	0	1
TCGA-77-7337-01	0	0	0	0	0	0	0	0	0	0	0	0	0	0	0	0	0	0	0	0	1	0	0	1	1	0	0	0	0	0	0	0	0	0	0	0	0	0	0	0	0	0	0	0	1
TCGA-77-7338-01	0	0	0	0	0	0	0	0	0	0	0	0	0	0	0	0	0	0	0	0	1	0	0	1	1	0	0	0	0	0	0	0	0	0	0	0	0	0	0	0	0	0	0	0	1
TCGA-77-7465-01	0	0	0	0	0	0	0	0	0	0	0	0	0	0	0	0	0	0	0	0	1	0	0	1	1	0	0	0	0	0	0	0	0	0	0	0	0	0	0	0	0	0	0	0	1
TCGA-77-8008-01	0	0	0	0	0	0	0	0	0	0	0	0	0	0	0	0	0	0	0	0	1	0	0	1	1	0	0	0	0	0	0	0	0	0	0	0	0	0	0	0	0	0	0	0	1
TCGA-77-8131-01	0	0	0	0	0	0	0	0	0	0	0	0	0	0	0	0	0	0	0	0	1	0	0	1	1	0	0	0	0	0	0	0	0	0	0	0	0	0	0	0	0	0	0	0	1
TCGA-77-8136-01	0	0	0	0	0	0	0	0	0	0	0	0	0	0	0	0	0	0	0	0	1	0	0	1	1	0	0	0	0	0	0	0	0	0	0	0	0	0	0	0	0	0	0	0	1
TCGA-77-8140-01	0	0	0	0	0	0	0	0	0	0	0	0	0	0	0	0	0	0	0	0	1	0	0	1	1	0	0	0	0	0	0	0	0	0	0	0	0	0	0	0	0	0	0	0	1
TCGA-77-8145-01	0	0	0	0	0	0	0	0	0	0	0	0	0	0	0	0	0	0	0	0	1	0	0	1	1	0	0	0	0	0	0	0	0	0	0	0	0	0	0	0	0	0	0	0	1
TCGA-77-8153-01	0	0	0	0	0	0	0	0	0	0	0	0	0	0	0	0	0	0	0	0	1	0	0	1	1	0	0	0	0	0	0	0	0	0	0	0	0	0	0	0	0	0	0	0	1
TCGA-77-8154-01	0	0	0	0	0	0	0	0	0	0	0	0	0	0	0	0	0	0	0	0	1	0	0	1	1	0	0	0	0	0	0	0	0	0	0	0	0	0	0	0	0	0	0	0	1
TCGA-77-A5FZ-01	0	0	0	0	0	0	0	0	0	0	0	0	0	0	0	0	0	0	0	0	1	0	0	1	1	0	0	0	0	0	0	0	0	0	0	0	0	0	0	0	0	0	0	0	1
TCGA-77-A5G1-01	0	0	0	0	0	0	0	0	0	0	0	0	0	0	0	0	0	0	0	0	1	0	0	1	1	0	0	0	0	0	0	0	0	0	0	0	0	0	0	0	0	0	0	0	1
TCGA-77-A5G7-01	0	0	0	0	0	0	0	0	0	0	0	0	0	0	0	0	0	0	0	0	1	0	0	1	1	0	0	0	0	0	0	0	0	0	0	0	0	0	0	0	0	0	0	0	1
TCGA-77-A5GB-01	0	0	0	0	0	0	0	0	0	0	0	0	0	0	0	0	0	0	0	0	1	0	0	1	1	0	0	0	0	0	0	0	0	0	0	0	0	0	0	0	0	0	0	0	1
TCGA-77-A5GH-01	0	0	0	0	0	0	0	0	0	0	0	0	0	0	0	0	0	0	0	0	1	0	0	1	1	0	0	0	0	0	0	0	0	0	0	0	0	0	0	0	0	0	0	0	1
TCGA-78-7148-01	0	0	0	0	0	0	0	0	0	0	0	0	0	0	0	0	0	0	0	0	0	0	0	0	1	0	0	0	1	0	0	0	0	0	0	0	0	0	0	0	0	0	0	0	1
TCGA-78-7152-01	0	0	0	0	0	0	0	0	0	0	0	0	0	0	0	0	0	0	0	0	0	0	0	0	1	0	0	0	1	0	0	0	0	0	0	0	0	0	0	0	0	0	0	0	1
TCGA-78-7156-01	0	0	0	0	0	0	0	0	0	0	0	0	0	0	0	0	0	0	0	0	0	0	0	0	1	0	0	0	1	0	0	0	0	0	0	0	0	0	0	0	0	0	0	0	1
TCGA-78-7158-01	0	0	0	0	0	0	0	0	0	0	0	0	0	0	0	0	0	0	0	0	0	0	0	0	1	0	0	0	1	0	0	0	0	0	0	0	0	0	0	0	0	0	0	0	1
TCGA-78-7160-01	0	0	0	0	0	0	0	0	0	0	0	0	0	0	0	0	0	0	0	0	0	0	0	0	1	0	0	0	1	0	0	0	0	0	0	0	0	0	0	0	0	0	0	0	1
TCGA-78-7162-01	0	0	0	0	0	0	0	0	0	0	0	0	0	0	0	0	0	0	0	0	0	0	0	0	1	0	0	0	1	0	0	0	0	0	0	0	0	0	0	0	0	0	0	0	1
TCGA-78-7166-01	0	0	0	0	0	0	0	0	0	0	0	0	0	0	0	0	0	0	0	0	0	0	0	0	1	0	0	0	1	0	0	0	0	0	0	0	0	0	0	0	0	0	0	0	1
TCGA-78-7537-01	0	0	0	0	0	0	0	0	0	0	0	0	0	0	0	0	0	0	0	0	0	0	0	0	1	0	0	0	1	0	0	0	0	0	0	0	0	0	0	0	0	0	0	0	1
TCGA-78-7540-01	0	0	0	0	0	0	0	0	0	0	0	0	0	0	0	0	0	0	0	0	0	0	0	0	1	0	0	0	1	0	0	0	0	0	0	0	0	0	0	0	0	0	0	0	1
TCGA-78-7633-01	0	0	0	0	0	0	0	0	0	0	0	0	0	0	0	0	0	0	0	0	0	0	0	0	1	0	0	0	1	0	0	0	0	0	0	0	0	0	0	0	0	0	0	0	1
TCGA-78-8660-01	0	0	0	0	0	0	0	0	0	0	0	0	0	0	0	0	0	0	0	0	0	0	0	0	1	0	0	0	1	0	0	0	0	0	0	0	0	0	0	0	0	0	0	0	1
TCGA-79-5596-01	0	0	0	0	0	0	0	0	0	0	0	0	0	0	0	0	0	0	0	0	1	0	0	1	1	0	0	0	0	0	0	0	0	0	0	0	0	0	0	0	0	0	0	0	1
TCGA-80-5607-01	0	0	0	0	0	0	0	0	0	0	0	0	0	0	0	0	0	0	0	0	0	0	0	0	1	0	0	0	1	0	0	0	0	0	0	0	0	0	0	0	0	0	0	0	1
TCGA-81-5910-01	1	0	0	0	0	0	0	0	0	0	0	0	0	0	0	0	0	0	0	0	0	0	0	0	1	0	0	0	0	0	0	0	0	0	1	0	0	0	0	0	0	0	0	0	1
TCGA-81-5911-01	1	0	0	0	0	0	0	0	0	0	0	0	0	0	0	0	0	0	0	0	0	0	0	0	1	0	0	0	0	0	0	0	0	0	1	0	0	0	0	0	0	0	0	0	1
TCGA-83-5908-01	0	0	0	0	0	0	0	0	0	0	0	0	0	0	0	0	0	0	0	0	0	0	0	0	1	0	0	0	1	0	0	0	0	0	0	0	0	0	0	0	0	0	0	0	1
TCGA-85-6561-01	0	0	0	0	0	0	0	0	0	0	0	0	0	0	0	0	0	0	0	0	1	0	0	1	1	0	0	0	0	0	0	0	0	0	0	0	0	0	0	0	0	0	0	0	1
TCGA-85-7696-01	0	0	0	0	0	0	0	0	0	0	0	0	0	0	0	0	0	0	0	0	1	0	0	1	1	0	0	0	0	0	0	0	0	0	0	0	0	0	0	0	0	0	0	0	1
TCGA-85-7697-01	0	0	0	0	0	0	0	0	0	0	0	0	0	0	0	0	0	0	0	0	1	0	0	1	1	0	0	0	0	0	0	0	0	0	0	0	0	0	0	0	0	0	0	0	1
TCGA-85-7698-01	0	0	0	0	0	0	0	0	0	0	0	0	0	0	0	0	0	0	0	0	1	0	0	1	1	0	0	0	0	0	0	0	0	0	0	0	0	0	0	0	0	0	0	0	1
TCGA-85-7699-01	0	0	0	0	0	0	0	0	0	0	0	0	0	0	0	0	0	0	0	0	1	0	0	1	1	0	0	0	0	0	0	0	0	0	0	0	0	0	0	0	0	0	0	0	1
TCGA-85-7710-01	0	0	0	0	0	0	0	0	0	0	0	0	0	0	0	0	0	0	0	0	1	0	0	1	1	0	0	0	0	0	0	0	0	0	0	0	0	0	0	0	0	0	0	0	1
TCGA-85-8048-01	0	0	0	0	0	0	0	0	0	0	0	0	0	0	0	0	0	0	0	0	1	0	0	1	1	0	0	0	0	0	0	0	0	0	0	0	0	0	0	0	0	0	0	0	1
TCGA-85-8070-01	0	0	0	0	0	0	0	0	0	0	0	0	0	0	0	0	0	0	0	0	1	0	0	1	1	0	0	0	0	0	0	0	0	0	0	0	0	0	0	0	0	0	0	0	1
TCGA-85-8071-01	0	0	0	0	0	0	0	0	0	0	0	0	0	0	0	0	0	0	0	0	1	0	0	1	1	0	0	0	0	0	0	0	0	0	0	0	0	0	0	0	0	0	0	0	1
TCGA-85-8288-01	0	0	0	0	0	0	0	0	0	0	0	0	0	0	0	0	0	0	0	0	1	0	0	1	1	0	0	0	0	0	0	0	0	0	0	0	0	0	0	0	0	0	0	0	1
TCGA-85-8353-01	0	0	0	0	0	0	0	0	0	0	0	0	0	0	0	0	0	0	0	0	1	0	0	1	1	0	0	0	0	0	0	0	0	0	0	0	0	0	0	0	0	0	0	0	1
TCGA-85-8355-01	0	0	0	0	0	0	0	0	0	0	0	0	0	0	0	0	0	0	0	0	1	0	0	1	1	0	0	0	0	0	0	0	0	0	0	0	0	0	0	0	0	0	0	0	1
TCGA-85-8479-01	0	0	0	0	0	0	0	0	0	0	0	0	0	0	0	0	0	0	0	0	1	0	0	1	1	0	0	0	0	0	0	0	0	0	0	0	0	0	0	0	0	0	0	0	1
TCGA-85-8481-01	0	0	0	0	0	0	0	0	0	0	0	0	0	0	0	0	0	0	0	0	1	0	0	1	1	0	0	0	0	0	0	0	0	0	0	0	0	0	0	0	0	0	0	0	1
TCGA-85-8580-01	0	0	0	0	0	0	0	0	0	0	0	0	0	0	0	0	0	0	0	0	1	0	0	1	1	0	0	0	0	0	0	0	0	0	0	0	0	0	0	0	0	0	0	0	1
TCGA-85-8584-01	0	0	0	0	0	0	0	0	0	0	0	0	0	0	0	0	0	0	0	0	1	0	0	1	1	0	0	0	0	0	0	0	0	0	0	0	0	0	0	0	0	0	0	0	1
TCGA-85-A4CL-01	0	0	0	0	0	0	0	0	0	0	0	0	0	0	0	0	0	0	0	0	1	0	0	1	1	0	0	0	0	0	0	0	0	0	0	0	0	0	0	0	0	0	0	0	1
TCGA-85-A4CN-01	0	0	0	0	0	0	0	0	0	0	0	0	0	0	0	0	0	0	0	0	1	0	0	1	1	0	0	0	0	0	0	0	0	0	0	0	0	0	0	0	0	0	0	0	1
TCGA-85-A4PA-01	0	0	0	0	0	0	0	0	0	0	0	0	0	0	0	0	0	0	0	0	1	0	0	1	1	0	0	0	0	0	0	0	0	0	0	0	0	0	0	0	0	0	0	0	1
TCGA-85-A4QQ-01	0	0	0	0	0	0	0	0	0	0	0	0	0	0	0	0	0	0	0	0	1	0	0	1	1	0	0	0	0	0	0	0	0	0	0	0	0	0	0	0	0	0	0	0	1
TCGA-85-A50Z-01	0	0	0	0	0	0	0	0	0	0	0	0	0	0	0	0	0	0	0	0	1	0	0	1	1	0	0	0	0	0	0	0	0	0	0	0	0	0	0	0	0	0	0	0	1
TCGA-85-A512-01	0	0	0	0	0	0	0	0	0	0	0	0	0	0	0	0	0	0	0	0	1	0	0	1	1	0	0	0	0	0	0	0	0	0	0	0	0	0	0	0	0	0	0	0	1
TCGA-85-A513-01	0	0	0	0	0	0	0	0	0	0	0	0	0	0	0	0	0	0	0	0	1	0	0	1	1	0	0	0	0	0	0	0	0	0	0	0	0	0	0	0	0	0	0	0	1
TCGA-85-A53L-01	0	0	0	0	0	0	0	0	0	0	0	0	0	0	0	0	0	0	0	0	1	0	0	1	1	0	0	0	0	0	0	0	0	0	0	0	0	0	0	0	0	0	0	0	1
TCGA-86-7711-01	0	0	0	0	0	0	0	0	0	0	0	0	0	0	0	0	0	0	0	0	0	0	0	0	1	0	0	0	1	0	0	0	0	0	0	0	0	0	0	0	0	0	0	0	1
TCGA-86-7714-01	0	0	0	0	0	0	0	0	0	0	0	0	0	0	0	0	0	0	0	0	0	0	0	0	1	0	0	0	1	0	0	0	0	0	0	0	0	0	0	0	0	0	0	0	1
TCGA-86-8073-01	0	0	0	0	0	0	0	0	0	0	0	0	0	0	0	0	0	0	0	0	0	0	0	0	1	0	0	0	1	0	0	0	0	0	0	0	0	0	0	0	0	0	0	0	1
TCGA-86-8076-01	0	0	0	0	0	0	0	0	0	0	0	0	0	0	0	0	0	0	0	0	0	0	0	0	1	0	0	0	1	0	0	0	0	0	0	0	0	0	0	0	0	0	0	0	1
TCGA-86-8278-01	0	0	0	0	0	0	0	0	0	0	0	0	0	0	0	0	0	0	0	0	0	0	0	0	1	0	0	0	1	0	0	0	0	0	0	0	0	0	0	0	0	0	0	0	1
TCGA-86-8281-01	0	0	0	0	0	0	0	0	0	0	0	0	0	0	0	0	0	0	0	0	0	0	0	0	1	0	0	0	1	0	0	0	0	0	0	0	0	0	0	0	0	0	0	0	1
TCGA-86-8671-01	0	0	0	0	0	0	0	0	0	0	0	0	0	0	0	0	0	0	0	0	0	0	0	0	1	0	0	0	1	0	0	0	0	0	0	0	0	0	0	0	0	0	0	0	1
TCGA-86-8674-01	0	0	0	0	0	0	0	0	0	0	0	0	0	0	0	0	0	0	0	0	0	0	0	0	1	0	0	0	1	0	0	0	0	0	0	0	0	0	0	0	0	0	0	0	1
TCGA-86-A456-01	0	0	0	0	0	0	0	0	0	0	0	0	0	0	0	0	0	0	0	0	0	0	0	0	1	0	0	0	1	0	0	0	0	0	0	0	0	0	0	0	0	0	0	0	1
TCGA-86-A4D0-01	0	0	0	0	0	0	0	0	0	0	0	0	0	0	0	0	0	0	0	0	0	0	0	0	1	0	0	0	1	0	0	0	0	0	0	0	0	0	0	0	0	0	0	0	1
TCGA-86-A4P7-01	0	0	0	0	0	0	0	0	0	0	0	0	0	0	0	0	0	0	0	0	0	0	0	0	1	0	0	0	1	0	0	0	0	0	0	0	0	0	0	0	0	0	0	0	1
TCGA-86-A4P8-01	0	0	0	0	0	0	0	0	0	0	0	0	0	0	0	0	0	0	0	0	0	0	0	0	1	0	0	0	1	0	0	0	0	0	0	0	0	0	0	0	0	0	0	0	1
TCGA-87-5896-01	1	0	0	0	0	0	0	0	0	0	0	0	0	0	0	0	0	0	0	0	0	0	0	0	1	0	0	0	0	0	0	0	0	0	1	0	0	0	0	0	0	0	0	0	1
TCGA-90-7766-01	0	0	0	0	0	0	0	0	0	0	0	0	0	0	0	0	0	0	0	0	1	0	0	1	1	0	0	0	0	0	0	0	0	0	0	0	0	0	0	0	0	0	0	0	1
TCGA-90-7964-01	0	0	0	0	0	0	0	0	0	0	0	0	0	0	0	0	0	0	0	0	1	0	0	1	1	0	0	0	0	0	0	0	0	0	0	0	0	0	0	0	0	0	0	0	1
TCGA-90-A4EE-01	0	0	0	0	0	0	0	0	0	0	0	0	0	0	0	0	0	0	0	0	1	0	0	1	1	0	0	0	0	0	0	0	0	0	0	0	0	0	0	0	0	0	0	0	1
TCGA-91-6830-01	0	0	0	0	0	0	0	0	0	0	0	0	0	0	0	0	0	0	0	0	0	0	0	0	1	0	0	0	1	0	0	0	0	0	0	0	0	0	0	0	0	0	0	0	1
TCGA-91-6835-01	0	0	0	0	0	0	0	0	0	0	0	0	0	0	0	0	0	0	0	0	0	0	0	0	1	0	0	0	1	0	0	0	0	0	0	0	0	0	0	0	0	0	0	0	1
TCGA-91-6849-01	0	0	0	0	0	0	0	0	0	0	0	0	0	0	0	0	0	0	0	0	0	0	0	0	1	0	0	0	1	0	0	0	0	0	0	0	0	0	0	0	0	0	0	0	1
TCGA-91-8496-01	0	0	0	0	0	0	0	0	0	0	0	0	0	0	0	0	0	0	0	0	0	0	0	0	1	0	0	0	1	0	0	0	0	0	0	0	0	0	0	0	0	0	0	0	1
TCGA-91-8497-01	0	0	0	0	0	0	0	0	0	0	0	0	0	0	0	0	0	0	0	0	0	0	0	0	1	0	0	0	1	0	0	0	0	0	0	0	0	0	0	0	0	0	0	0	1
TCGA-91-A4BD-01	0	0	0	0	0	0	0	0	0	0	0	0	0	0	0	0	0	0	0	0	0	0	0	0	1	0	0	0	1	0	0	0	0	0	0	0	0	0	0	0	0	0	0	0	1
TCGA-92-7340-01	0	0	0	0	0	0	0	0	0	0	0	0	0	0	0	0	0	0	0	0	1	0	0	1	1	0	0	0	0	0	0	0	0	0	0	0	0	0	0	0	0	0	0	0	1
TCGA-92-8063-01	0	0	0	0	0	0	0	0	0	0	0	0	0	0	0	0	0	0	0	0	1	0	0	1	1	0	0	0	0	0	0	0	0	0	0	0	0	0	0	0	0	0	0	0	1
TCGA-92-8065-01	0	0	0	0	0	0	0	0	0	0	0	0	0	0	0	0	0	0	0	0	1	0	0	1	1	0	0	0	0	0	0	0	0	0	0	0	0	0	0	0	0	0	0	0	1
TCGA-93-7347-01	0	0	0	0	0	0	0	0	0	0	0	0	0	0	0	0	0	0	0	0	0	0	0	0	1	0	0	0	1	0	0	0	0	0	0	0	0	0	0	0	0	0	0	0	1
TCGA-93-7348-01	0	0	0	0	0	0	0	0	0	0	0	0	0	0	0	0	0	0	0	0	0	0	0	0	1	0	0	0	1	0	0	0	0	0	0	0	0	0	0	0	0	0	0	0	1
TCGA-93-A4JO-01	0	0	0	0	0	0	0	0	0	0	0	0	0	0	0	0	0	0	0	0	0	0	0	0	1	0	0	0	1	0	0	0	0	0	0	0	0	0	0	0	0	0	0	0	1
TCGA-93-A4JP-01	0	0	0	0	0	0	0	0	0	0	0	0	0	0	0	0	0	0	0	0	0	0	0	0	1	0	0	0	1	0	0	0	0	0	0	0	0	0	0	0	0	0	0	0	1
TCGA-94-7033-01	0	0	0	0	0	0	0	0	0	0	0	0	0	0	0	0	0	0	0	0	1	0	0	1	1	0	0	0	0	0	0	0	0	0	0	0	0	0	0	0	0	0	0	0	1
TCGA-94-8035-01	0	0	0	0	0	0	0	0	0	0	0	0	0	0	0	0	0	0	0	0	1	0	0	1	1	0	0	0	0	0	0	0	0	0	0	0	0	0	0	0	0	0	0	0	1
TCGA-94-8490-01	0	0	0	0	0	0	0	0	0	0	0	0	0	0	0	0	0	0	0	0	1	0	0	1	1	0	0	0	0	0	0	0	0	0	0	0	0	0	0	0	0	0	0	0	1
TCGA-94-8491-01	0	0	0	0	0	0	0	0	0	0	0	0	0	0	0	0	0	0	0	0	1	0	0	1	1	0	0	0	0	0	0	0	0	0	0	0	0	0	0	0	0	0	0	0	1
TCGA-95-7944-01	0	0	0	0	0	0	0	0	0	0	0	0	0	0	0	0	0	0	0	0	0	0	0	0	1	0	0	0	1	0	0	0	0	0	0	0	0	0	0	0	0	0	0	0	1
TCGA-95-7947-01	0	0	0	0	0	0	0	0	0	0	0	0	0	0	0	0	0	0	0	0	0	0	0	0	1	0	0	0	1	0	0	0	0	0	0	0	0	0	0	0	0	0	0	0	1
TCGA-95-8039-01	0	0	0	0	0	0	0	0	0	0	0	0	0	0	0	0	0	0	0	0	0	0	0	0	1	0	0	0	1	0	0	0	0	0	0	0	0	0	0	0	0	0	0	0	1
TCGA-95-A4VK-01	0	0	0	0	0	0	0	0	0	0	0	0	0	0	0	0	0	0	0	0	0	0	0	0	1	0	0	0	1	0	0	0	0	0	0	0	0	0	0	0	0	0	0	0	1
TCGA-96-7544-01	0	0	0	0	0	0	0	0	0	0	0	0	0	0	0	0	0	0	0	0	1	0	0	1	1	0	0	0	0	0	0	0	0	0	0	0	0	0	0	0	0	0	0	0	1
TCGA-96-7545-01	0	0	0	0	0	0	0	0	0	0	0	0	0	0	0	0	0	0	0	0	1	0	0	1	1	0	0	0	0	0	0	0	0	0	0	0	0	0	0	0	0	0	0	0	1
TCGA-96-8169-01	0	0	0	0	0	0	0	0	0	0	0	0	0	0	0	0	0	0	0	0	1	0	0	1	1	0	0	0	0	0	0	0	0	0	0	0	0	0	0	0	0	0	0	0	1
TCGA-96-8170-01	0	0	0	0	0	0	0	0	0	0	0	0	0	0	0	0	0	0	0	0	1	0	0	1	1	0	0	0	0	0	0	0	0	0	0	0	0	0	0	0	0	0	0	0	1
TCGA-96-A4JL-01	0	0	0	0	0	0	0	0	0	0	0	0	0	0	0	0	0	0	0	0	1	0	0	1	1	0	0	0	0	0	0	0	0	0	0	0	0	0	0	0	0	0	0	0	1
TCGA-97-7546-01	0	0	0	0	0	0	0	0	0	0	0	0	0	0	0	0	0	0	0	0	0	0	0	0	1	0	0	0	1	0	0	0	0	0	0	0	0	0	0	0	0	0	0	0	1
TCGA-97-7552-01	0	0	0	0	0	0	0	0	0	0	0	0	0	0	0	0	0	0	0	0	0	0	0	0	1	0	0	0	1	0	0	0	0	0	0	0	0	0	0	0	0	0	0	0	1
TCGA-97-7553-01	0	0	0	0	0	0	0	0	0	0	0	0	0	0	0	0	0	0	0	0	0	0	0	0	1	0	0	0	1	0	0	0	0	0	0	0	0	0	0	0	0	0	0	0	1
TCGA-97-7938-01	0	0	0	0	0	0	0	0	0	0	0	0	0	0	0	0	0	0	0	0	0	0	0	0	1	0	0	0	1	0	0	0	0	0	0	0	0	0	0	0	0	0	0	0	1
TCGA-97-7941-01	0	0	0	0	0	0	0	0	0	0	0	0	0	0	0	0	0	0	0	0	0	0	0	0	1	0	0	0	1	0	0	0	0	0	0	0	0	0	0	0	0	0	0	0	1
TCGA-97-8171-01	0	0	0	0	0	0	0	0	0	0	0	0	0	0	0	0	0	0	0	0	0	0	0	0	1	0	0	0	1	0	0	0	0	0	0	0	0	0	0	0	0	0	0	0	1
TCGA-97-8175-01	0	0	0	0	0	0	0	0	0	0	0	0	0	0	0	0	0	0	0	0	0	0	0	0	1	0	0	0	1	0	0	0	0	0	0	0	0	0	0	0	0	0	0	0	1
TCGA-97-8176-01	0	0	0	0	0	0	0	0	0	0	0	0	0	0	0	0	0	0	0	0	0	0	0	0	1	0	0	0	1	0	0	0	0	0	0	0	0	0	0	0	0	0	0	0	1
TCGA-97-8547-01	0	0	0	0	0	0	0	0	0	0	0	0	0	0	0	0	0	0	0	0	0	0	0	0	1	0	0	0	1	0	0	0	0	0	0	0	0	0	0	0	0	0	0	0	1
TCGA-97-A4LX-01	0	0	0	0	0	0	0	0	0	0	0	0	0	0	0	0	0	0	0	0	0	0	0	0	1	0	0	0	1	0	0	0	0	0	0	0	0	0	0	0	0	0	0	0	1
TCGA-97-A4M2-01	0	0	0	0	0	0	0	0	0	0	0	0	0	0	0	0	0	0	0	0	0	0	0	0	1	0	0	0	1	0	0	0	0	0	0	0	0	0	0	0	0	0	0	0	1
TCGA-97-A4M3-01	0	0	0	0	0	0	0	0	0	0	0	0	0	0	0	0	0	0	0	0	0	0	0	0	1	0	0	0	1	0	0	0	0	0	0	0	0	0	0	0	0	0	0	0	1
TCGA-97-A4M5-01	0	0	0	0	0	0	0	0	0	0	0	0	0	0	0	0	0	0	0	0	0	0	0	0	1	0	0	0	1	0	0	0	0	0	0	0	0	0	0	0	0	0	0	0	1
TCGA-97-A4M6-01	0	0	0	0	0	0	0	0	0	0	0	0	0	0	0	0	0	0	0	0	0	0	0	0	1	0	0	0	1	0	0	0	0	0	0	0	0	0	0	0	0	0	0	0	1
TCGA-97-A4M7-01	0	0	0	0	0	0	0	0	0	0	0	0	0	0	0	0	0	0	0	0	0	0	0	0	1	0	0	0	1	0	0	0	0	0	0	0	0	0	0	0	0	0	0	0	1
TCGA-98-7454-01	0	0	0	0	0	0	0	0	0	0	0	0	0	0	0	0	0	0	0	0	1	0	0	1	1	0	0	0	0	0	0	0	0	0	0	0	0	0	0	0	0	0	0	0	1
TCGA-98-A53A-01	0	0	0	0	0	0	0	0	0	0	0	0	0	0	0	0	0	0	0	0	1	0	0	1	1	0	0	0	0	0	0	0	0	0	0	0	0	0	0	0	0	0	0	0	1
TCGA-98-A53C-01	0	0	0	0	0	0	0	0	0	0	0	0	0	0	0	0	0	0	0	0	1	0	0	1	1	0	0	0	0	0	0	0	0	0	0	0	0	0	0	0	0	0	0	0	1
TCGA-98-A53D-01	0	0	0	0	0	0	0	0	0	0	0	0	0	0	0	0	0	0	0	0	1	0	0	1	1	0	0	0	0	0	0	0	0	0	0	0	0	0	0	0	0	0	0	0	1
TCGA-98-A53H-01	0	0	0	0	0	0	0	0	0	0	0	0	0	0	0	0	0	0	0	0	1	0	0	1	1	0	0	0	0	0	0	0	0	0	0	0	0	0	0	0	0	0	0	0	1
TCGA-98-A53I-01	0	0	0	0	0	0	0	0	0	0	0	0	0	0	0	0	0	0	0	0	1	0	0	1	1	0	0	0	0	0	0	0	0	0	0	0	0	0	0	0	0	0	0	0	1
TCGA-99-7458-01	0	0	0	0	0	0	0	0	0	0	0	0	0	0	0	0	0	0	0	0	0	0	0	0	1	0	0	0	1	0	0	0	0	0	0	0	0	0	0	0	0	0	0	0	1
TCGA-99-8028-01	0	0	0	0	0	0	0	0	0	0	0	0	0	0	0	0	0	0	0	0	0	0	0	0	1	0	0	0	1	0	0	0	0	0	0	0	0	0	0	0	0	0	0	0	1
TCGA-99-AA5R-01	0	0	0	0	0	0	0	0	0	0	0	0	0	0	0	0	0	0	0	0	0	0	0	0	1	0	0	0	1	0	0	0	0	0	0	0	0	0	0	0	0	0	0	0	1
TCGA-A1-A0SB-01	0	0	0	0	0	0	0	0	0	0	0	1	0	0	0	0	0	0	0	0	0	0	0	0	1	0	0	0	0	0	0	0	0	0	0	0	0	0	0	0	0	0	0	0	1
TCGA-A1-A0SD-01	0	0	0	0	0	0	0	0	0	0	0	1	0	0	0	0	0	1	0	0	0	0	0	0	1	0	0	0	0	0	0	0	0	0	0	0	0	0	0	0	0	0	0	0	1
TCGA-A1-A0SE-01	0	0	0	0	0	0	0	0	0	0	0	1	0	0	0	0	0	1	0	0	0	0	0	0	1	0	0	0	0	0	0	0	0	0	0	0	0	0	0	0	0	0	0	0	1
TCGA-A1-A0SG-01	0	0	0	0	0	0	0	0	0	0	0	1	0	0	0	0	0	0	0	0	0	0	0	0	1	0	0	0	0	0	0	0	0	0	0	0	0	0	0	0	0	0	0	0	1
TCGA-A1-A0SH-01	0	0	0	0	0	0	0	0	0	0	0	1	0	0	0	0	0	1	0	0	0	0	0	0	1	0	0	0	0	0	0	0	0	0	0	0	0	0	0	0	0	0	0	0	1
TCGA-A1-A0SI-01	0	0	0	0	0	0	0	0	0	0	0	1	0	0	0	0	0	0	0	0	0	0	0	0	1	0	0	0	0	0	0	0	0	0	0	0	0	0	0	0	0	0	0	0	1
TCGA-A1-A0SM-01	0	0	0	0	0	0	0	0	0	0	0	1	0	0	0	0	0	1	0	0	0	0	0	0	1	0	0	0	0	0	0	0	0	0	0	0	0	0	0	0	0	0	0	0	1
TCGA-A1-A0SO-01	0	0	0	0	0	0	0	0	0	0	0	1	0	0	0	0	0	0	1	0	0	0	0	0	1	0	0	0	0	0	0	0	0	0	0	0	0	0	0	0	0	0	0	0	1
TCGA-A1-A0SP-01	0	0	0	0	0	0	0	0	0	0	0	1	0	0	0	0	0	0	0	0	0	0	0	0	1	0	0	0	0	0	0	0	0	0	0	0	0	0	0	0	0	0	0	0	1
TCGA-A1-A0SQ-01	0	0	0	0	0	0	0	0	0	0	0	1	0	0	0	0	0	0	0	0	0	0	0	0	1	0	0	0	0	0	0	0	0	0	0	0	0	0	0	0	0	0	0	0	1
TCGA-A2-A04N-01	0	0	0	0	0	0	0	0	0	0	0	1	0	0	0	0	0	1	0	0	0	0	0	0	1	0	0	0	0	0	0	0	0	0	0	0	0	0	0	0	0	0	0	0	1
TCGA-A2-A04Q-01	0	0	0	0	0	0	0	0	0	0	0	1	0	0	0	0	0	0	1	0	0	0	0	0	1	0	0	0	0	0	0	0	0	0	0	0	0	0	0	0	0	0	0	0	1
TCGA-A2-A04R-01	0	0	0	0	0	0	0	0	0	0	0	1	0	0	0	0	0	1	0	0	0	0	0	0	1	0	0	0	0	0	0	0	0	0	0	0	0	0	0	0	0	0	0	0	1
TCGA-A2-A04V-01	0	0	0	0	0	0	0	0	0	0	0	1	0	0	0	0	0	1	0	0	0	0	0	0	1	0	0	0	0	0	0	0	0	0	0	0	0	0	0	0	0	0	0	0	1
TCGA-A2-A04X-01	0	0	0	0	0	0	0	0	0	0	0	1	0	0	0	0	0	0	0	0	0	0	0	0	1	0	0	0	0	0	0	0	0	0	0	0	0	0	0	0	0	0	0	0	1
TCGA-A2-A04Y-01	0	0	0	0	0	0	0	0	0	0	0	1	0	0	0	0	0	1	0	0	0	0	0	0	1	0	0	0	0	0	0	0	0	0	0	0	0	0	0	0	0	0	0	0	1
TCGA-A2-A0CK-01	0	0	0	0	0	0	0	0	0	0	0	1	0	0	0	0	0	0	0	0	0	0	0	0	1	0	0	0	0	0	0	0	0	0	0	0	0	0	0	0	0	0	0	0	1
TCGA-A2-A0CO-01	0	0	0	0	0	0	0	0	0	0	0	1	0	0	0	0	0	0	0	0	0	0	0	0	1	0	0	0	0	0	0	0	0	0	0	0	0	0	0	0	0	0	0	0	1
TCGA-A2-A0CP-01	0	0	0	0	0	0	0	0	0	0	0	1	0	0	0	0	0	1	0	0	0	0	0	0	1	0	0	0	0	0	0	0	0	0	0	0	0	0	0	0	0	0	0	0	1
TCGA-A2-A0CQ-01	0	0	0	0	0	0	0	0	0	0	0	1	0	0	0	0	0	1	0	0	0	0	0	0	1	0	0	0	0	0	0	0	0	0	0	0	0	0	0	0	0	0	0	0	1
TCGA-A2-A0CR-01	0	0	0	0	0	0	0	0	0	0	0	1	0	0	0	0	0	0	0	0	0	0	0	0	1	0	0	0	0	0	0	0	0	0	0	0	0	0	0	0	0	0	0	0	1
TCGA-A2-A0D2-01	0	0	0	0	0	0	0	0	0	0	0	1	0	0	0	0	0	0	1	0	0	0	0	0	1	0	0	0	0	0	0	0	0	0	0	0	0	0	0	0	0	0	0	0	1
TCGA-A2-A0D3-01	0	0	0	0	0	0	0	0	0	0	0	1	0	0	0	0	0	1	0	0	0	0	0	0	1	0	0	0	0	0	0	0	0	0	0	0	0	0	0	0	0	0	0	0	1
TCGA-A2-A0EM-01	0	0	0	0	0	0	0	0	0	0	0	1	0	0	0	0	0	1	0	0	0	0	0	0	1	0	0	0	0	0	0	0	0	0	0	0	0	0	0	0	0	0	0	0	1
TCGA-A2-A0EN-01	0	0	0	0	0	0	0	0	0	0	0	1	0	0	0	0	0	1	0	0	0	0	0	0	1	0	0	0	0	0	0	0	0	0	0	0	0	0	0	0	0	0	0	0	1
TCGA-A2-A0ER-01	0	0	0	0	0	0	0	0	0	0	0	1	0	0	0	0	0	1	0	0	0	0	0	0	1	0	0	0	0	0	0	0	0	0	0	0	0	0	0	0	0	0	0	0	1
TCGA-A2-A0ES-01	0	0	0	0	0	0	0	0	0	0	0	1	0	0	0	0	0	1	0	0	0	0	0	0	1	0	0	0	0	0	0	0	0	0	0	0	0	0	0	0	0	0	0	0	1
TCGA-A2-A0EW-01	0	0	0	0	0	0	0	0	0	0	0	1	0	0	0	0	0	1	0	0	0	0	0	0	1	0	0	0	0	0	0	0	0	0	0	0	0	0	0	0	0	0	0	0	1
TCGA-A2-A0EX-01	0	0	0	0	0	0	0	0	0	0	0	1	0	0	0	0	0	1	0	0	0	0	0	0	1	0	0	0	0	0	0	0	0	0	0	0	0	0	0	0	0	0	0	0	1
TCGA-A2-A0SU-01	0	0	0	0	0	0	0	0	0	0	0	1	0	0	0	0	0	1	0	0	0	0	0	0	1	0	0	0	0	0	0	0	0	0	0	0	0	0	0	0	0	0	0	0	1
TCGA-A2-A0SV-01	0	0	0	0	0	0	0	0	0	0	0	1	0	0	0	0	0	1	0	0	0	0	0	0	1	0	0	0	0	0	0	0	0	0	0	0	0	0	0	0	0	0	0	0	1
TCGA-A2-A0SX-01	0	0	0	0	0	0	0	0	0	0	0	1	0	0	0	0	0	0	1	0	0	0	0	0	1	0	0	0	0	0	0	0	0	0	0	0	0	0	0	0	0	0	0	0	1
TCGA-A2-A0SY-01	0	0	0	0	0	0	0	0	0	0	0	1	0	0	0	0	0	1	0	0	0	0	0	0	1	0	0	0	0	0	0	0	0	0	0	0	0	0	0	0	0	0	0	0	1
TCGA-A2-A0T0-01	0	0	0	0	0	0	0	0	0	0	0	1	0	0	0	0	0	0	1	0	0	0	0	0	1	0	0	0	0	0	0	0	0	0	0	0	0	0	0	0	0	0	0	0	1
TCGA-A2-A0T4-01	0	0	0	0	0	0	0	0	0	0	0	1	0	0	0	0	0	1	0	0	0	0	0	0	1	0	0	0	0	0	0	0	0	0	0	0	0	0	0	0	0	0	0	0	1
TCGA-A2-A0T5-01	0	0	0	0	0	0	0	0	0	0	0	1	0	0	0	0	0	1	0	0	0	0	0	0	1	0	0	0	0	0	0	0	0	0	0	0	0	0	0	0	0	0	0	0	1
TCGA-A2-A0T6-01	0	0	0	0	0	0	0	0	0	0	0	1	0	0	0	0	0	1	0	0	0	0	0	0	1	0	0	0	0	0	0	0	0	0	0	0	0	0	0	0	0	0	0	0	1
TCGA-A2-A0T7-01	0	0	0	0	0	0	0	0	0	0	0	1	0	0	0	0	0	1	0	0	0	0	0	0	1	0	0	0	0	0	0	0	0	0	0	0	0	0	0	0	0	0	0	0	1
TCGA-A2-A0YC-01	0	0	0	0	0	0	0	0	0	0	0	1	0	0	0	0	0	1	0	0	0	0	0	0	1	0	0	0	0	0	0	0	0	0	0	0	0	0	0	0	0	0	0	0	1
TCGA-A2-A0YD-01	0	0	0	0	0	0	0	0	0	0	0	1	0	0	0	0	0	1	0	0	0	0	0	0	1	0	0	0	0	0	0	0	0	0	0	0	0	0	0	0	0	0	0	0	1
TCGA-A2-A0YF-01	0	0	0	0	0	0	0	0	0	0	0	1	0	0	0	0	0	1	0	0	0	0	0	0	1	0	0	0	0	0	0	0	0	0	0	0	0	0	0	0	0	0	0	0	1
TCGA-A2-A0YI-01	0	0	0	0	0	0	0	0	0	0	0	1	0	0	0	0	0	1	0	0	0	0	0	0	1	0	0	0	0	0	0	0	0	0	0	0	0	0	0	0	0	0	0	0	1
TCGA-A2-A0YK-01	0	0	0	0	0	0	0	0	0	0	0	1	0	0	0	0	0	0	0	0	0	0	0	0	1	0	0	0	0	0	0	0	0	0	0	0	0	0	0	0	0	0	0	0	1
TCGA-A2-A0YL-01	0	0	0	0	0	0	0	0	0	0	0	1	0	0	0	0	0	1	0	0	0	0	0	0	1	0	0	0	0	0	0	0	0	0	0	0	0	0	0	0	0	0	0	0	1
TCGA-A2-A1FV-01	0	0	0	0	0	0	0	0	0	0	0	1	0	0	0	0	0	0	0	0	0	0	0	0	1	0	0	0	0	0	0	0	0	0	0	0	0	0	0	0	0	0	0	0	1
TCGA-A2-A1FX-01	0	0	0	0	0	0	0	0	0	0	0	1	0	0	0	0	0	0	0	0	0	0	0	0	1	0	0	0	0	0	0	0	0	0	0	0	0	0	0	0	0	0	0	0	1
TCGA-A2-A1FZ-01	0	0	0	0	0	0	0	0	0	0	0	1	0	0	0	0	0	0	0	0	0	0	0	0	1	0	0	0	0	0	0	0	0	0	0	0	0	0	0	0	0	0	0	0	1
TCGA-A2-A1G0-01	0	0	0	0	0	0	0	0	0	0	0	1	0	0	0	0	0	0	0	0	0	0	0	0	1	0	0	0	0	0	0	0	0	0	0	0	0	0	0	0	0	0	0	0	1
TCGA-A2-A1G4-01	0	0	0	0	0	0	0	0	0	0	0	1	0	0	0	0	0	0	0	0	0	0	0	0	1	0	0	0	0	0	0	0	0	0	0	0	0	0	0	0	0	0	0	0	1
TCGA-A2-A259-01	0	0	0	0	0	0	0	0	0	0	0	1	0	0	0	0	0	0	0	0	0	0	0	0	1	0	0	0	0	0	0	0	0	0	0	0	0	0	0	0	0	0	0	0	1
TCGA-A2-A25A-01	0	0	0	0	0	0	0	0	0	0	0	1	0	0	0	0	0	0	0	0	0	0	0	0	1	0	0	0	0	0	0	0	0	0	0	0	0	0	0	0	0	0	0	0	1
TCGA-A2-A25C-01	0	0	0	0	0	0	0	0	0	0	0	1	0	0	0	0	0	0	0	0	0	0	0	0	1	0	0	0	0	0	0	0	0	0	0	0	0	0	0	0	0	0	0	0	1
TCGA-A2-A25D-01	0	0	0	0	0	0	0	0	0	0	0	1	0	0	0	0	0	0	0	0	0	0	0	0	1	0	0	0	0	0	0	0	0	0	0	0	0	0	0	0	0	0	0	0	1
TCGA-A2-A25E-01	0	0	0	0	0	0	0	0	0	0	0	1	0	0	0	0	0	0	0	0	0	0	0	0	1	0	0	0	0	0	0	0	0	0	0	0	0	0	0	0	0	0	0	0	1
TCGA-A2-A3KC-01	0	0	0	0	0	0	0	0	0	0	0	1	0	0	0	0	0	0	0	0	0	0	0	0	1	0	0	0	0	0	0	0	0	0	0	0	0	0	0	0	0	0	0	0	1
TCGA-A2-A3KD-01	0	0	0	0	0	0	0	0	0	0	0	1	0	0	0	0	0	0	0	0	0	0	0	0	1	0	0	0	0	0	0	0	0	0	0	0	0	0	0	0	0	0	0	0	1
TCGA-A2-A3XU-01	0	0	0	0	0	0	0	0	0	0	0	1	0	0	0	0	0	0	0	0	0	0	0	0	1	0	0	0	0	0	0	0	0	0	0	0	0	0	0	0	0	0	0	0	1
TCGA-A2-A3XV-01	0	0	0	0	0	0	0	0	0	0	0	1	0	0	0	0	0	0	0	0	0	0	0	0	1	0	0	0	0	0	0	0	0	0	0	0	0	0	0	0	0	0	0	0	1
TCGA-A2-A3XY-01	0	0	0	0	0	0	0	0	0	0	0	1	0	0	0	0	0	0	0	0	0	0	0	0	1	0	0	0	0	0	0	0	0	0	0	0	0	0	0	0	0	0	0	0	1
TCGA-A2-A3XZ-01	0	0	0	0	0	0	0	0	0	0	0	1	0	0	0	0	0	0	0	0	0	0	0	0	1	0	0	0	0	0	0	0	0	0	0	0	0	0	0	0	0	0	0	0	1
TCGA-A2-A3Y0-01	0	0	0	0	0	0	0	0	0	0	0	1	0	0	0	0	0	0	0	0	0	0	0	0	1	0	0	0	0	0	0	0	0	0	0	0	0	0	0	0	0	0	0	0	1
TCGA-A2-A4RW-01	0	0	0	0	0	0	0	0	0	0	0	1	0	0	0	0	0	0	0	0	0	0	0	0	1	0	0	0	0	0	0	0	0	0	0	0	0	0	0	0	0	0	0	0	1
TCGA-A2-A4RY-01	0	0	0	0	0	0	0	0	0	0	0	1	0	0	0	0	0	0	0	0	0	0	0	0	1	0	0	0	0	0	0	0	0	0	0	0	0	0	0	0	0	0	0	0	1
TCGA-A2-A4S0-01	0	0	0	0	0	0	0	0	0	0	0	1	0	0	0	0	0	0	0	0	0	0	0	0	1	0	0	0	0	0	0	0	0	0	0	0	0	0	0	0	0	0	0	0	1
TCGA-A2-A4S2-01	0	0	0	0	0	0	0	0	0	0	0	1	0	0	0	0	0	0	0	0	0	0	0	0	1	0	0	0	0	0	0	0	0	0	0	0	0	0	0	0	0	0	0	0	1
TCGA-A2-A4S3-01	0	0	0	0	0	0	0	0	0	0	0	1	0	0	0	0	0	0	0	0	0	0	0	0	1	0	0	0	0	0	0	0	0	0	0	0	0	0	0	0	0	0	0	0	1
TCGA-A3-3306-01	0	0	0	0	0	0	0	0	0	0	0	0	0	1	0	0	0	0	0	0	0	1	0	0	1	0	0	0	0	0	0	0	0	0	0	0	0	0	0	0	0	0	0	0	1
TCGA-A3-3307-01	0	0	0	0	0	0	0	0	0	0	0	0	0	1	0	0	0	0	0	0	0	1	0	0	1	0	0	0	0	0	0	0	0	0	0	0	0	0	0	0	0	0	0	0	1
TCGA-A3-3308-01	0	0	0	0	0	0	0	0	0	0	0	0	0	1	0	0	0	0	0	0	0	1	0	0	1	0	0	0	0	0	0	0	0	0	0	0	0	0	0	0	0	0	0	0	1
TCGA-A3-3311-01	0	0	0	0	0	0	0	0	0	0	0	0	0	1	0	0	0	0	0	0	0	1	0	0	1	0	0	0	0	0	0	0	0	0	0	0	0	0	0	0	0	0	0	0	1
TCGA-A3-3313-01	0	0	0	0	0	0	0	0	0	0	0	0	0	1	0	0	0	0	0	0	0	1	0	0	1	0	0	0	0	0	0	0	0	0	0	0	0	0	0	0	0	0	0	0	1
TCGA-A3-3317-01	0	0	0	0	0	0	0	0	0	0	0	0	0	1	0	0	0	0	0	0	0	1	0	0	1	0	0	0	0	0	0	0	0	0	0	0	0	0	0	0	0	0	0	0	1
TCGA-A3-3319-01	0	0	0	0	0	0	0	0	0	0	0	0	0	1	0	0	0	0	0	0	0	1	0	0	1	0	0	0	0	0	0	0	0	0	0	0	0	0	0	0	0	0	0	0	1
TCGA-A3-3320-01	0	0	0	0	0	0	0	0	0	0	0	0	0	1	0	0	0	0	0	0	0	1	0	0	1	0	0	0	0	0	0	0	0	0	0	0	0	0	0	0	0	0	0	0	1
TCGA-A3-3322-01	0	0	0	0	0	0	0	0	0	0	0	0	0	1	0	0	0	0	0	0	0	1	0	0	1	0	0	0	0	0	0	0	0	0	0	0	0	0	0	0	0	0	0	0	1
TCGA-A3-3323-01	0	0	0	0	0	0	0	0	0	0	0	0	0	1	0	0	0	0	0	0	0	1	0	0	1	0	0	0	0	0	0	0	0	0	0	0	0	0	0	0	0	0	0	0	1
TCGA-A3-3324-01	0	0	0	0	0	0	0	0	0	0	0	0	0	1	0	0	0	0	0	0	0	1	0	0	1	0	0	0	0	0	0	0	0	0	0	0	0	0	0	0	0	0	0	0	1
TCGA-A3-3326-01	0	0	0	0	0	0	0	0	0	0	0	0	0	1	0	0	0	0	0	0	0	1	0	0	1	0	0	0	0	0	0	0	0	0	0	0	0	0	0	0	0	0	0	0	1
TCGA-A3-3331-01	0	0	0	0	0	0	0	0	0	0	0	0	0	1	0	0	0	0	0	0	0	1	0	0	1	0	0	0	0	0	0	0	0	0	0	0	0	0	0	0	0	0	0	0	1
TCGA-A3-3335-01	0	0	0	0	0	0	0	0	0	0	0	0	0	1	0	0	0	0	0	0	0	1	0	0	1	0	0	0	0	0	0	0	0	0	0	0	0	0	0	0	0	0	0	0	1
TCGA-A3-3343-01	0	0	0	0	0	0	0	0	0	0	0	0	0	1	0	0	0	0	0	0	0	1	0	0	1	0	0	0	0	0	0	0	0	0	0	0	0	0	0	0	0	0	0	0	1
TCGA-A3-3346-01	0	0	0	0	0	0	0	0	0	0	0	0	0	1	0	0	0	0	0	0	0	1	0	0	1	0	0	0	0	0	0	0	0	0	0	0	0	0	0	0	0	0	0	0	1
TCGA-A3-3347-01	0	0	0	0	0	0	0	0	0	0	0	0	0	1	0	0	0	0	0	0	0	1	0	0	1	0	0	0	0	0	0	0	0	0	0	0	0	0	0	0	0	0	0	0	1
TCGA-A3-3351-01	0	0	0	0	0	0	0	0	0	0	0	0	0	1	0	0	0	0	0	0	0	1	0	0	1	0	0	0	0	0	0	0	0	0	0	0	0	0	0	0	0	0	0	0	1
TCGA-A3-3357-01	0	0	0	0	0	0	0	0	0	0	0	0	0	1	0	0	0	0	0	0	0	1	0	0	1	0	0	0	0	0	0	0	0	0	0	0	0	0	0	0	0	0	0	0	1
TCGA-A3-3358-01	0	0	0	0	0	0	0	0	0	0	0	0	0	1	0	0	0	0	0	0	0	1	0	0	1	0	0	0	0	0	0	0	0	0	0	0	0	0	0	0	0	0	0	0	1
TCGA-A3-3359-01	0	0	0	0	0	0	0	0	0	0	0	0	0	1	0	0	0	0	0	0	0	1	0	0	1	0	0	0	0	0	0	0	0	0	0	0	0	0	0	0	0	0	0	0	1
TCGA-A3-3363-01	0	0	0	0	0	0	0	0	0	0	0	0	0	1	0	0	0	0	0	0	0	1	0	0	1	0	0	0	0	0	0	0	0	0	0	0	0	0	0	0	0	0	0	0	1
TCGA-A3-3367-01	0	0	0	0	0	0	0	0	0	0	0	0	0	1	0	0	0	0	0	0	0	1	0	0	1	0	0	0	0	0	0	0	0	0	0	0	0	0	0	0	0	0	0	0	1
TCGA-A3-3370-01	0	0	0	0	0	0	0	0	0	0	0	0	0	1	0	0	0	0	0	0	0	1	0	0	1	0	0	0	0	0	0	0	0	0	0	0	0	0	0	0	0	0	0	0	1
TCGA-A3-3373-01	0	0	0	0	0	0	0	0	0	0	0	0	0	1	0	0	0	0	0	0	0	1	0	0	1	0	0	0	0	0	0	0	0	0	0	0	0	0	0	0	0	0	0	0	1
TCGA-A3-3376-01	0	0	0	0	0	0	0	0	0	0	0	0	0	1	0	0	0	0	0	0	0	1	0	0	1	0	0	0	0	0	0	0	0	0	0	0	0	0	0	0	0	0	0	0	1
TCGA-A3-3378-01	0	0	0	0	0	0	0	0	0	0	0	0	0	1	0	0	0	0	0	0	0	1	0	0	1	0	0	0	0	0	0	0	0	0	0	0	0	0	0	0	0	0	0	0	1
TCGA-A3-3383-01	0	0	0	0	0	0	0	0	0	0	0	0	0	1	0	0	0	0	0	0	0	1	0	0	1	0	0	0	0	0	0	0	0	0	0	0	0	0	0	0	0	0	0	0	1
TCGA-A3-3385-01	0	0	0	0	0	0	0	0	0	0	0	0	0	1	0	0	0	0	0	0	0	1	0	0	1	0	0	0	0	0	0	0	0	0	0	0	0	0	0	0	0	0	0	0	1
TCGA-A3-3387-01	0	0	0	0	0	0	0	0	0	0	0	0	0	1	0	0	0	0	0	0	0	1	0	0	1	0	0	0	0	0	0	0	0	0	0	0	0	0	0	0	0	0	0	0	1
TCGA-A3-A6NI-01	0	0	0	0	0	0	0	0	0	0	0	0	0	1	0	0	0	0	0	0	0	1	0	0	1	0	0	0	0	0	0	0	0	0	0	0	0	0	0	0	0	0	0	0	1
TCGA-A3-A6NJ-01	0	0	0	0	0	0	0	0	0	0	0	0	0	1	0	0	0	0	0	0	0	1	0	0	1	0	0	0	0	0	0	0	0	0	0	0	0	0	0	0	0	0	0	0	1
TCGA-A3-A6NL-01	0	0	0	0	0	0	0	0	0	0	0	0	0	1	0	0	0	0	0	0	0	1	0	0	1	0	0	0	0	0	0	0	0	0	0	0	0	0	0	0	0	0	0	0	1
TCGA-A3-A6NN-01	0	0	0	0	0	0	0	0	0	0	0	0	0	1	0	0	0	0	0	0	0	1	0	0	1	0	0	0	0	0	0	0	0	0	0	0	0	0	0	0	0	0	0	0	1
TCGA-A3-A8CQ-01	0	0	0	0	0	0	0	0	0	0	0	0	0	1	0	0	0	0	0	0	0	1	0	0	1	0	0	0	0	0	0	0	0	0	0	0	0	0	0	0	0	0	0	0	1
TCGA-A3-A8OU-01	0	0	0	0	0	0	0	0	0	0	0	0	0	1	0	0	0	0	0	0	0	1	0	0	1	0	0	0	0	0	0	0	0	0	0	0	0	0	0	0	0	0	0	0	1
TCGA-A3-A8OV-01	0	0	0	0	0	0	0	0	0	0	0	0	0	1	0	0	0	0	0	0	0	1	0	0	1	0	0	0	0	0	0	0	0	0	0	0	0	0	0	0	0	0	0	0	1
TCGA-A3-A8OW-01	0	0	0	0	0	0	0	0	0	0	0	0	0	1	0	0	0	0	0	0	0	1	0	0	1	0	0	0	0	0	0	0	0	0	0	0	0	0	0	0	0	0	0	0	1
TCGA-A3-A8OX-01	0	0	0	0	0	0	0	0	0	0	0	0	0	1	0	0	0	0	0	0	0	1	0	0	1	0	0	0	0	0	0	0	0	0	0	0	0	0	0	0	0	0	0	0	1
TCGA-A4-7287-01	0	0	0	0	0	0	0	0	0	0	0	0	0	1	0	0	0	0	0	0	0	0	0	0	1	0	0	0	0	0	0	0	0	0	0	0	0	0	1	0	0	0	0	0	1
TCGA-A4-7288-01	0	0	0	0	0	0	0	0	0	0	0	0	0	1	0	0	0	0	0	0	0	0	0	0	1	0	0	0	0	0	0	0	0	0	0	0	0	0	1	0	0	0	0	0	1
TCGA-A4-7583-01	0	0	0	0	0	0	0	0	0	0	0	0	0	1	0	0	0	0	0	0	0	0	0	0	1	0	0	0	0	0	0	0	0	0	0	0	0	0	1	0	0	0	0	0	1
TCGA-A4-7584-01	0	0	0	0	0	0	0	0	0	0	0	0	0	1	0	0	0	0	0	0	0	0	0	0	1	0	0	0	0	0	0	0	0	0	0	0	0	0	1	0	0	0	0	0	1
TCGA-A4-7585-01	0	0	0	0	0	0	0	0	0	0	0	0	0	1	0	0	0	0	0	0	0	0	0	0	1	0	0	0	0	0	0	0	0	0	0	0	0	0	1	0	0	0	0	0	1
TCGA-A4-7732-01	0	0	0	0	0	0	0	0	0	0	0	0	0	1	0	0	0	0	0	0	0	0	0	0	1	0	0	0	0	0	0	0	0	0	0	0	0	0	1	0	0	0	0	0	1
TCGA-A4-7734-01	0	0	0	0	0	0	0	0	0	0	0	0	0	1	0	0	0	0	0	0	0	0	0	0	1	0	0	0	0	0	0	0	0	0	0	0	0	0	1	0	0	0	0	0	1
TCGA-A4-7828-01	0	0	0	0	0	0	0	0	0	0	0	0	0	1	0	0	0	0	0	0	0	0	0	0	1	0	0	0	0	0	0	0	0	0	0	0	0	0	1	0	0	0	0	0	1
TCGA-A4-7915-01	0	0	0	0	0	0	0	0	0	0	0	0	0	1	0	0	0	0	0	0	0	0	0	0	1	0	0	0	0	0	0	0	0	0	0	0	0	0	1	0	0	0	0	0	1
TCGA-A4-7996-01	0	0	0	0	0	0	0	0	0	0	0	0	0	1	0	0	0	0	0	0	0	0	0	0	1	0	0	0	0	0	0	0	0	0	0	0	0	0	1	0	0	0	0	0	1
TCGA-A4-7997-01	0	0	0	0	0	0	0	0	0	0	0	0	0	1	0	0	0	0	0	0	0	0	0	0	1	0	0	0	0	0	0	0	0	0	0	0	0	0	1	0	0	0	0	0	1
TCGA-A4-8098-01	0	0	0	0	0	0	0	0	0	0	0	0	0	1	0	0	0	0	0	0	0	0	0	0	1	0	0	0	0	0	0	0	0	0	0	0	0	0	1	0	0	0	0	0	1
TCGA-A4-8310-01	0	0	0	0	0	0	0	0	0	0	0	0	0	1	0	0	0	0	0	0	0	0	0	0	1	0	0	0	0	0	0	0	0	0	0	0	0	0	1	0	0	0	0	0	1
TCGA-A4-8311-01	0	0	0	0	0	0	0	0	0	0	0	0	0	1	0	0	0	0	0	0	0	0	0	0	1	0	0	0	0	0	0	0	0	0	0	0	0	0	1	0	0	0	0	0	1
TCGA-A4-8312-01	0	0	0	0	0	0	0	0	0	0	0	0	0	1	0	0	0	0	0	0	0	0	0	0	1	0	0	0	0	0	0	0	0	0	0	0	0	0	1	0	0	0	0	0	1
TCGA-A4-8515-01	0	0	0	0	0	0	0	0	0	0	0	0	0	1	0	0	0	0	0	0	0	0	0	0	1	0	0	0	0	0	0	0	0	0	0	0	0	0	1	0	0	0	0	0	1
TCGA-A4-8516-01	0	0	0	0	0	0	0	0	0	0	0	0	0	1	0	0	0	0	0	0	0	0	0	0	1	0	0	0	0	0	0	0	0	0	0	0	0	0	1	0	0	0	0	0	1
TCGA-A4-8517-01	0	0	0	0	0	0	0	0	0	0	0	0	0	1	0	0	0	0	0	0	0	0	0	0	1	0	0	0	0	0	0	0	0	0	0	0	0	0	1	0	0	0	0	0	1
TCGA-A4-8518-01	0	0	0	0	0	0	0	0	0	0	0	0	0	1	0	0	0	0	0	0	0	0	0	0	1	0	0	0	0	0	0	0	0	0	0	0	0	0	1	0	0	0	0	0	1
TCGA-A4-8630-01	0	0	0	0	0	0	0	0	0	0	0	0	0	1	0	0	0	0	0	0	0	0	0	0	1	0	0	0	0	0	0	0	0	0	0	0	0	0	1	0	0	0	0	0	1
TCGA-A4-A48D-01	0	0	0	0	0	0	0	0	0	0	0	0	0	1	0	0	0	0	0	0	0	0	0	0	1	0	0	0	0	0	0	0	0	0	0	0	0	0	1	0	0	0	0	0	1
TCGA-A4-A4ZT-01	0	0	0	0	0	0	0	0	0	0	0	0	0	1	0	0	0	0	0	0	0	0	0	0	1	0	0	0	0	0	0	0	0	0	0	0	0	0	1	0	0	0	0	0	1
TCGA-A4-A57E-01	0	0	0	0	0	0	0	0	0	0	0	0	0	1	0	0	0	0	0	0	0	0	0	0	1	0	0	0	0	0	0	0	0	0	0	0	0	0	1	0	0	0	0	0	1
TCGA-A4-A5DU-01	0	0	0	0	0	0	0	0	0	0	0	0	0	1	0	0	0	0	0	0	0	0	0	0	1	0	0	0	0	0	0	0	0	0	0	0	0	0	1	0	0	0	0	0	1
TCGA-A4-A5XZ-01	0	0	0	0	0	0	0	0	0	0	0	0	0	1	0	0	0	0	0	0	0	0	0	0	1	0	0	0	0	0	0	0	0	0	0	0	0	0	1	0	0	0	0	0	1
TCGA-A4-A5Y0-01	0	0	0	0	0	0	0	0	0	0	0	0	0	1	0	0	0	0	0	0	0	0	0	0	1	0	0	0	0	0	0	0	0	0	0	0	0	0	1	0	0	0	0	0	1
TCGA-A4-A6HP-01	0	0	0	0	0	0	0	0	0	0	0	0	0	1	0	0	0	0	0	0	0	0	0	0	1	0	0	0	0	0	0	0	0	0	0	0	0	0	1	0	0	0	0	0	1
TCGA-A4-A772-01	0	0	0	0	0	0	0	0	0	0	0	0	0	1	0	0	0	0	0	0	0	0	0	0	1	0	0	0	0	0	0	0	0	0	0	0	0	0	1	0	0	0	0	0	1
TCGA-A4-A7UZ-01	0	0	0	0	0	0	0	0	0	0	0	0	0	1	0	0	0	0	0	0	0	0	0	0	1	0	0	0	0	0	0	0	0	0	0	0	0	0	1	0	0	0	0	0	1
TCGA-A5-A0G2-01	0	0	0	0	0	0	0	0	0	0	0	0	0	0	0	0	0	0	0	0	0	0	0	0	1	0	0	0	0	0	1	0	0	0	0	0	0	0	0	0	0	0	0	0	1
TCGA-A5-A0G9-01	0	0	0	0	0	0	0	0	0	0	0	0	0	0	0	0	0	0	0	0	0	0	0	0	1	0	0	0	0	0	1	0	0	0	0	0	0	0	0	0	0	0	0	0	1
TCGA-A5-A0GA-01	0	0	0	0	0	0	0	0	0	0	0	0	0	0	0	0	0	0	0	0	0	0	0	0	1	0	0	0	0	0	1	0	0	0	0	0	0	0	0	0	0	0	0	0	1
TCGA-A5-A0GB-01	0	0	0	0	0	0	0	0	0	0	0	0	0	0	0	0	0	0	0	0	0	0	0	0	1	0	0	0	0	0	1	0	0	0	0	0	0	0	0	0	0	0	0	0	1
TCGA-A5-A0GD-01	0	0	0	0	0	0	0	0	0	0	0	0	0	0	0	0	0	0	0	0	0	0	0	0	1	0	0	0	0	0	1	0	0	0	0	0	0	0	0	0	0	0	0	0	1
TCGA-A5-A0GE-01	0	0	0	0	0	0	0	0	0	0	0	0	0	0	0	0	0	0	0	0	0	0	0	0	1	0	0	0	0	0	1	0	0	0	0	0	0	0	0	0	0	0	0	0	1
TCGA-A5-A0GG-01	0	0	0	0	0	0	0	0	0	0	0	0	0	0	0	0	0	0	0	0	0	0	0	0	1	0	0	0	0	0	1	0	0	0	0	0	0	0	0	0	0	0	0	0	1
TCGA-A5-A0GH-01	0	0	0	0	0	0	0	0	0	0	0	0	0	0	0	0	0	0	0	0	0	0	0	0	1	0	0	0	0	0	1	0	0	0	0	0	0	0	0	0	0	0	0	0	1
TCGA-A5-A0GI-01	0	0	0	0	0	0	0	0	0	0	0	0	0	0	0	0	0	0	0	0	0	0	0	0	1	0	0	0	0	0	1	0	0	0	0	0	0	0	0	0	0	0	0	0	1
TCGA-A5-A0GJ-01	0	0	0	0	0	0	0	0	0	0	0	0	0	0	0	0	0	0	0	0	0	0	0	0	1	0	0	0	0	0	1	0	0	0	0	0	0	0	0	0	0	0	0	0	1
TCGA-A5-A0GM-01	0	0	0	0	0	0	0	0	0	0	0	0	0	0	0	0	0	0	0	0	0	0	0	0	1	0	0	0	0	0	1	0	0	0	0	0	0	0	0	0	0	0	0	0	1
TCGA-A5-A0GP-01	0	0	0	0	0	0	0	0	0	0	0	0	0	0	0	0	0	0	0	0	0	0	0	0	1	0	0	0	0	0	1	0	0	0	0	0	0	0	0	0	0	0	0	0	1
TCGA-A5-A0GQ-01	0	0	0	0	0	0	0	0	0	0	0	0	0	0	0	0	0	0	0	0	0	0	0	0	1	0	0	0	0	0	1	0	0	0	0	0	0	0	0	0	0	0	0	0	1
TCGA-A5-A0GR-01	0	0	0	0	0	0	0	0	0	0	0	0	0	0	0	0	0	0	0	0	0	0	0	0	1	0	0	0	0	0	1	0	0	0	0	0	0	0	0	0	0	0	0	0	1
TCGA-A5-A0GU-01	0	0	0	0	0	0	0	0	0	0	0	0	0	0	0	0	0	0	0	0	0	0	0	0	1	0	0	0	0	0	1	0	0	0	0	0	0	0	0	0	0	0	0	0	1
TCGA-A5-A0GV-01	0	0	0	0	0	0	0	0	0	0	0	0	0	0	0	0	0	0	0	0	0	0	0	0	1	0	0	0	0	0	1	0	0	0	0	0	0	0	0	0	0	0	0	0	1
TCGA-A5-A0GW-01	0	0	0	0	0	0	0	0	0	0	0	0	0	0	0	0	0	0	0	0	0	0	0	0	1	0	0	0	0	0	1	0	0	0	0	0	0	0	0	0	0	0	0	0	1
TCGA-A5-A0GX-01	0	0	0	0	0	0	0	0	0	0	0	0	0	0	0	0	0	0	0	0	0	0	0	0	1	0	0	0	0	0	1	0	0	0	0	0	0	0	0	0	0	0	0	0	1
TCGA-A5-A0R7-01	0	0	0	0	0	0	0	0	0	0	0	0	0	0	0	0	0	0	0	0	0	0	0	0	1	0	0	0	0	0	1	0	0	0	0	0	0	0	0	0	0	0	0	0	1
TCGA-A5-A0R8-01	0	0	0	0	0	0	0	0	0	0	0	0	0	0	0	0	0	0	0	0	0	0	0	0	1	0	0	0	0	0	1	0	0	0	0	0	0	0	0	0	0	0	0	0	1
TCGA-A5-A0R9-01	0	0	0	0	0	0	0	0	0	0	0	0	0	0	0	0	0	0	0	0	0	0	0	0	1	0	0	0	0	0	1	0	0	0	0	0	0	0	0	0	0	0	0	0	1
TCGA-A5-A0RA-01	0	0	0	0	0	0	0	0	0	0	0	0	0	0	0	0	0	0	0	0	0	0	0	0	1	0	0	0	0	0	1	0	0	0	0	0	0	0	0	0	0	0	0	0	1
TCGA-A5-A0VP-01	0	0	0	0	0	0	0	0	0	0	0	0	0	0	0	0	0	0	0	0	0	0	0	0	1	0	0	0	0	0	1	0	0	0	0	0	0	0	0	0	0	0	0	0	1
TCGA-A5-A0VQ-01	0	0	0	0	0	0	0	0	0	0	0	0	0	0	0	0	0	0	0	0	0	0	0	0	1	0	0	0	0	0	1	0	0	0	0	0	0	0	0	0	0	0	0	0	1
TCGA-A5-A1OF-01	0	0	0	0	0	0	0	0	0	0	0	0	0	0	0	0	0	0	0	0	0	0	0	0	1	0	0	0	0	0	1	0	0	0	0	0	0	0	0	0	0	0	0	0	1
TCGA-A5-A1OJ-01	0	0	0	0	0	0	0	0	0	0	0	0	0	0	0	0	0	0	0	0	0	0	0	0	1	0	0	0	0	0	1	0	0	0	0	0	0	0	0	0	0	0	0	0	1
TCGA-A5-A1OK-01	0	0	0	0	0	0	0	0	0	0	0	0	0	0	0	0	0	0	0	0	0	0	0	0	1	0	0	0	0	0	1	0	0	0	0	0	0	0	0	0	0	0	0	0	1
TCGA-A5-A2K5-01	0	0	0	0	0	0	0	0	0	0	0	0	0	0	0	0	0	0	0	0	0	0	0	0	1	0	0	0	0	0	1	0	0	0	0	0	0	0	0	0	0	0	0	0	1
TCGA-A5-A2K7-01	0	0	0	0	0	0	0	0	0	0	0	0	0	0	0	0	0	0	0	0	0	0	0	0	1	0	0	0	0	0	1	0	0	0	0	0	0	0	0	0	0	0	0	0	1
TCGA-A5-A7WK-01	0	0	0	0	0	0	0	0	0	0	0	0	0	0	0	0	0	0	0	0	0	0	0	0	1	0	0	0	0	0	1	0	0	0	0	0	0	0	0	0	0	0	0	0	1
TCGA-A5-AB3J-01	0	0	0	0	0	0	0	0	0	0	0	0	0	0	0	0	0	0	0	0	0	0	0	0	1	0	0	0	0	0	1	0	0	0	0	0	0	0	0	0	0	0	0	0	1
TCGA-A6-2672-01	0	0	0	0	0	0	0	0	0	0	0	0	0	0	0	0	0	0	0	0	0	0	0	0	1	0	0	0	0	0	0	0	1	0	0	0	0	0	0	0	0	0	1	0	1
TCGA-A6-2676-01	0	0	0	0	0	0	0	0	0	0	0	0	0	0	0	0	0	0	0	0	0	0	0	0	1	0	0	0	0	0	0	0	1	0	0	0	0	0	0	0	0	0	1	0	1
TCGA-A6-2678-01	0	0	0	0	0	0	0	0	0	0	0	0	0	0	0	0	0	0	0	0	0	0	0	0	1	0	0	0	0	0	0	0	1	0	0	0	0	0	0	0	0	0	1	0	1
TCGA-A6-2681-01	0	0	0	0	0	0	0	0	0	0	0	0	0	0	0	0	0	0	0	0	0	0	0	0	1	0	0	0	0	0	0	0	1	0	0	0	0	0	0	0	0	0	1	0	1
TCGA-A6-2685-01	0	0	0	0	0	0	0	0	0	0	0	0	0	0	0	0	0	0	0	0	0	0	0	0	1	0	0	0	0	0	0	0	1	0	0	0	0	0	0	0	0	0	1	0	1
TCGA-A6-5657-01	0	0	0	0	0	0	0	0	0	0	0	0	0	0	0	0	0	0	0	0	0	0	0	0	1	0	0	0	0	0	0	0	1	0	0	0	0	0	0	0	0	0	1	0	1
TCGA-A6-5661-01	0	0	0	0	0	0	0	0	0	0	0	0	0	0	0	0	0	0	0	0	0	0	0	0	1	0	0	0	0	0	0	0	1	0	0	0	0	0	0	0	0	0	1	0	1
TCGA-A6-5662-01	0	0	0	0	0	0	0	0	0	0	0	0	0	0	0	0	0	0	0	0	0	0	0	0	1	0	0	0	0	0	0	0	1	0	0	0	0	0	0	0	0	0	1	0	1
TCGA-A6-5664-01	0	0	0	0	0	0	0	0	0	0	0	0	0	0	0	0	0	0	0	0	0	0	0	0	1	0	0	0	0	0	0	0	1	0	0	0	0	0	0	0	0	0	1	0	1
TCGA-A6-5665-01	0	0	0	0	0	0	0	0	0	0	0	0	0	0	0	0	0	0	0	0	0	0	0	0	1	0	0	0	0	0	0	0	1	0	0	0	0	0	0	0	0	0	1	0	1
TCGA-A6-6137-01	0	0	0	0	0	0	0	0	0	0	0	0	0	0	0	0	0	0	0	0	0	0	0	0	1	0	0	0	0	0	0	0	1	0	0	0	0	0	0	0	0	0	1	0	1
TCGA-A6-6138-01	0	0	0	0	0	0	0	0	0	0	0	0	0	0	0	0	0	0	0	0	0	0	0	0	1	0	0	0	0	0	0	0	1	0	0	0	0	0	0	0	0	0	1	0	1
TCGA-A6-6140-01	0	0	0	0	0	0	0	0	0	0	0	0	0	0	0	0	0	0	0	0	0	0	0	0	1	0	0	0	0	0	0	0	1	0	0	0	0	0	0	0	0	0	1	0	1
TCGA-A6-6141-01	0	0	0	0	0	0	0	0	0	0	0	0	0	0	0	0	0	0	0	0	0	0	0	0	1	0	0	0	0	0	0	0	1	0	0	0	0	0	0	0	0	0	1	0	1
TCGA-A6-6652-01	0	0	0	0	0	0	0	0	0	0	0	0	0	0	0	0	0	0	0	0	0	0	0	0	1	0	0	0	0	0	0	0	1	0	0	0	0	0	0	0	0	0	1	0	1
TCGA-A6-6653-01	0	0	0	0	0	0	0	0	0	0	0	0	0	0	0	0	0	0	0	0	0	0	0	0	1	0	0	0	0	0	0	0	1	0	0	0	0	0	0	0	0	0	1	0	1
TCGA-A6-6782-01	0	0	0	0	0	0	0	0	0	0	0	0	0	0	0	0	0	0	0	0	0	0	0	0	1	0	0	0	0	0	0	0	1	0	0	0	0	0	0	0	0	0	1	0	1
TCGA-A6-A565-01	0	0	0	0	0	0	0	0	0	0	0	0	0	0	0	0	0	0	0	0	0	0	0	0	1	0	0	0	0	0	0	0	1	0	0	0	0	0	0	0	0	0	1	0	1
TCGA-A6-A566-01	0	0	0	0	0	0	0	0	0	0	0	0	0	0	0	0	0	0	0	0	0	0	0	0	1	0	0	0	0	0	0	0	1	0	0	0	0	0	0	0	0	0	1	0	1
TCGA-A6-A567-01	0	0	0	0	0	0	0	0	0	0	0	0	0	0	0	0	0	0	0	0	0	0	0	0	1	0	0	0	0	0	0	0	1	0	0	0	0	0	0	0	0	0	1	0	1
TCGA-A7-A0CG-01	0	0	0	0	0	0	0	0	0	0	0	1	0	0	0	0	0	1	0	0	0	0	0	0	1	0	0	0	0	0	0	0	0	0	0	0	0	0	0	0	0	0	0	0	1
TCGA-A7-A0CH-01	0	0	0	0	0	0	0	0	0	0	0	1	0	0	0	0	0	1	0	0	0	0	0	0	1	0	0	0	0	0	0	0	0	0	0	0	0	0	0	0	0	0	0	0	1
TCGA-A7-A0D9-01	0	0	0	0	0	0	0	0	0	0	0	1	0	0	0	0	0	1	0	0	0	0	0	0	1	0	0	0	0	0	0	0	0	0	0	0	0	0	0	0	0	0	0	0	1
TCGA-A7-A0DB-01	0	0	0	0	0	0	0	0	0	0	0	1	0	0	0	0	0	1	0	0	0	0	0	0	1	0	0	0	0	0	0	0	0	0	0	0	0	0	0	0	0	0	0	0	1
TCGA-A7-A13G-01	0	0	0	0	0	0	0	0	0	0	0	1	0	0	0	0	0	0	0	0	0	0	0	0	1	0	0	0	0	0	0	0	0	0	0	0	0	0	0	0	0	0	0	0	1
TCGA-A7-A13H-01	0	0	0	0	0	0	0	0	0	0	0	1	0	0	0	0	0	0	0	0	0	0	0	0	1	0	0	0	0	0	0	0	0	0	0	0	0	0	0	0	0	0	0	0	1
TCGA-A7-A26F-01	0	0	0	0	0	0	0	0	0	0	0	1	0	0	0	0	0	0	0	0	0	0	0	0	1	0	0	0	0	0	0	0	0	0	0	0	0	0	0	0	0	0	0	0	1
TCGA-A7-A26G-01	0	0	0	0	0	0	0	0	0	0	0	1	0	0	0	0	0	0	0	0	0	0	0	0	1	0	0	0	0	0	0	0	0	0	0	0	0	0	0	0	0	0	0	0	1
TCGA-A7-A26H-01	0	0	0	0	0	0	0	0	0	0	0	1	0	0	0	0	0	0	0	0	0	0	0	0	1	0	0	0	0	0	0	0	0	0	0	0	0	0	0	0	0	0	0	0	1
TCGA-A7-A3IY-01	0	0	0	0	0	0	0	0	0	0	0	1	0	0	0	0	0	0	0	0	0	0	0	0	1	0	0	0	0	0	0	0	0	0	0	0	0	0	0	0	0	0	0	0	1
TCGA-A7-A3IZ-01	0	0	0	0	0	0	0	0	0	0	0	1	0	0	0	0	0	0	0	0	0	0	0	0	1	0	0	0	0	0	0	0	0	0	0	0	0	0	0	0	0	0	0	0	1
TCGA-A7-A3J0-01	0	0	0	0	0	0	0	0	0	0	0	1	0	0	0	0	0	0	0	0	0	0	0	0	1	0	0	0	0	0	0	0	0	0	0	0	0	0	0	0	0	0	0	0	1
TCGA-A7-A3J1-01	0	0	0	0	0	0	0	0	0	0	0	1	0	0	0	0	0	0	0	0	0	0	0	0	1	0	0	0	0	0	0	0	0	0	0	0	0	0	0	0	0	0	0	0	1
TCGA-A7-A3RF-01	0	0	0	0	0	0	0	0	0	0	0	1	0	0	0	0	0	0	0	0	0	0	0	0	1	0	0	0	0	0	0	0	0	0	0	0	0	0	0	0	0	0	0	0	1
TCGA-A7-A425-01	0	0	0	0	0	0	0	0	0	0	0	1	0	0	0	0	0	0	0	0	0	0	0	0	1	0	0	0	0	0	0	0	0	0	0	0	0	0	0	0	0	0	0	0	1
TCGA-A7-A426-01	0	0	0	0	0	0	0	0	0	0	0	1	0	0	0	0	0	0	0	0	0	0	0	0	1	0	0	0	0	0	0	0	0	0	0	0	0	0	0	0	0	0	0	0	1
TCGA-A7-A4SA-01	0	0	0	0	0	0	0	0	0	0	0	1	0	0	0	0	0	0	0	0	0	0	0	0	1	0	0	0	0	0	0	0	0	0	0	0	0	0	0	0	0	0	0	0	1
TCGA-A7-A56D-01	0	0	0	0	0	0	0	0	0	0	0	1	0	0	0	0	0	0	0	0	0	0	0	0	1	0	0	0	0	0	0	0	0	0	0	0	0	0	0	0	0	0	0	0	1
TCGA-A7-A5ZW-01	0	0	0	0	0	0	0	0	0	0	0	1	0	0	0	0	0	0	0	0	0	0	0	0	1	0	0	0	0	0	0	0	0	0	0	0	0	0	0	0	0	0	0	0	1
TCGA-A7-A5ZX-01	0	0	0	0	0	0	0	0	0	0	0	1	0	0	0	0	0	0	0	0	0	0	0	0	1	0	0	0	0	0	0	0	0	0	0	0	0	0	0	0	0	0	0	0	1
TCGA-A7-A6VW-01	0	0	0	0	0	0	0	0	0	0	0	1	0	0	0	0	0	0	0	0	0	0	0	0	1	0	0	0	0	0	0	0	0	0	0	0	0	0	0	0	0	0	0	0	1
TCGA-A7-A6VY-01	0	0	0	0	0	0	0	0	0	0	0	1	0	0	0	0	0	0	0	0	0	0	0	0	1	0	0	0	0	0	0	0	0	0	0	0	0	0	0	0	0	0	0	0	1
TCGA-A8-A06P-01	0	0	0	0	0	0	0	0	0	0	0	1	0	0	0	0	0	1	0	0	0	0	0	0	1	0	0	0	0	0	0	0	0	0	0	0	0	0	0	0	0	0	0	0	1
TCGA-A8-A06Y-01	0	0	0	0	0	0	0	0	0	0	0	1	0	0	0	0	0	1	0	0	0	0	0	0	1	0	0	0	0	0	0	0	0	0	0	0	0	0	0	0	0	0	0	0	1
TCGA-A8-A07E-01	0	0	0	0	0	0	0	0	0	0	0	1	0	0	0	0	0	1	0	0	0	0	0	0	1	0	0	0	0	0	0	0	0	0	0	0	0	0	0	0	0	0	0	0	1
TCGA-A8-A07G-01	0	0	0	0	0	0	0	0	0	0	0	1	0	0	0	0	0	1	0	0	0	0	0	0	1	0	0	0	0	0	0	0	0	0	0	0	0	0	0	0	0	0	0	0	1
TCGA-A8-A07I-01	0	0	0	0	0	0	0	0	0	0	0	1	0	0	0	0	0	0	0	0	0	0	0	0	1	0	0	0	0	0	0	0	0	0	0	0	0	0	0	0	0	0	0	0	1
TCGA-A8-A07J-01	0	0	0	0	0	0	0	0	0	0	0	1	0	0	0	0	0	1	0	0	0	0	0	0	1	0	0	0	0	0	0	0	0	0	0	0	0	0	0	0	0	0	0	0	1
TCGA-A8-A07L-01	0	0	0	0	0	0	0	0	0	0	0	1	0	0	0	0	0	1	0	0	0	0	0	0	1	0	0	0	0	0	0	0	0	0	0	0	0	0	0	0	0	0	0	0	1
TCGA-A8-A07O-01	0	0	0	0	0	0	0	0	0	0	0	1	0	0	0	0	0	0	1	0	0	0	0	0	1	0	0	0	0	0	0	0	0	0	0	0	0	0	0	0	0	0	0	0	1
TCGA-A8-A07P-01	0	0	0	0	0	0	0	0	0	0	0	1	0	0	0	0	0	1	0	0	0	0	0	0	1	0	0	0	0	0	0	0	0	0	0	0	0	0	0	0	0	0	0	0	1
TCGA-A8-A07S-01	0	0	0	0	0	0	0	0	0	0	0	1	0	0	0	0	0	1	0	0	0	0	0	0	1	0	0	0	0	0	0	0	0	0	0	0	0	0	0	0	0	0	0	0	1
TCGA-A8-A07Z-01	0	0	0	0	0	0	0	0	0	0	0	1	0	0	0	0	0	1	0	0	0	0	0	0	1	0	0	0	0	0	0	0	0	0	0	0	0	0	0	0	0	0	0	0	1
TCGA-A8-A082-01	0	0	0	0	0	0	0	0	0	0	0	1	0	0	0	0	0	1	0	0	0	0	0	0	1	0	0	0	0	0	0	0	0	0	0	0	0	0	0	0	0	0	0	0	1
TCGA-A8-A083-01	0	0	0	0	0	0	0	0	0	0	0	1	0	0	0	0	0	1	0	0	0	0	0	0	1	0	0	0	0	0	0	0	0	0	0	0	0	0	0	0	0	0	0	0	1
TCGA-A8-A085-01	0	0	0	0	0	0	0	0	0	0	0	1	0	0	0	0	0	1	0	0	0	0	0	0	1	0	0	0	0	0	0	0	0	0	0	0	0	0	0	0	0	0	0	0	1
TCGA-A8-A086-01	0	0	0	0	0	0	0	0	0	0	0	1	0	0	0	0	0	1	0	0	0	0	0	0	1	0	0	0	0	0	0	0	0	0	0	0	0	0	0	0	0	0	0	0	1
TCGA-A8-A08A-01	0	0	0	0	0	0	0	0	0	0	0	1	0	0	0	0	0	1	0	0	0	0	0	0	1	0	0	0	0	0	0	0	0	0	0	0	0	0	0	0	0	0	0	0	1
TCGA-A8-A08C-01	0	0	0	0	0	0	0	0	0	0	0	1	0	0	0	0	0	1	0	0	0	0	0	0	1	0	0	0	0	0	0	0	0	0	0	0	0	0	0	0	0	0	0	0	1
TCGA-A8-A08H-01	0	0	0	0	0	0	0	0	0	0	0	1	0	0	0	0	0	0	1	0	0	0	0	0	1	0	0	0	0	0	0	0	0	0	0	0	0	0	0	0	0	0	0	0	1
TCGA-A8-A08L-01	0	0	0	0	0	0	0	0	0	0	0	1	0	0	0	0	0	0	0	0	0	0	0	0	1	0	0	0	0	0	0	0	0	0	0	0	0	0	0	0	0	0	0	0	1
TCGA-A8-A08O-01	0	0	0	0	0	0	0	0	0	0	0	1	0	0	0	0	0	1	0	0	0	0	0	0	1	0	0	0	0	0	0	0	0	0	0	0	0	0	0	0	0	0	0	0	1
TCGA-A8-A08T-01	0	0	0	0	0	0	0	0	0	0	0	1	0	0	0	0	0	1	0	0	0	0	0	0	1	0	0	0	0	0	0	0	0	0	0	0	0	0	0	0	0	0	0	0	1
TCGA-A8-A08Z-01	0	0	0	0	0	0	0	0	0	0	0	1	0	0	0	0	0	1	0	0	0	0	0	0	1	0	0	0	0	0	0	0	0	0	0	0	0	0	0	0	0	0	0	0	1
TCGA-A8-A094-01	0	0	0	0	0	0	0	0	0	0	0	1	0	0	0	0	0	0	0	0	0	0	0	0	1	0	0	0	0	0	0	0	0	0	0	0	0	0	0	0	0	0	0	0	1
TCGA-A8-A095-01	0	0	0	0	0	0	0	0	0	0	0	1	0	0	0	0	0	1	0	0	0	0	0	0	1	0	0	0	0	0	0	0	0	0	0	0	0	0	0	0	0	0	0	0	1
TCGA-A8-A096-01	0	0	0	0	0	0	0	0	0	0	0	1	0	0	0	0	0	1	0	0	0	0	0	0	1	0	0	0	0	0	0	0	0	0	0	0	0	0	0	0	0	0	0	0	1
TCGA-A8-A099-01	0	0	0	0	0	0	0	0	0	0	0	1	0	0	0	0	0	1	0	0	0	0	0	0	1	0	0	0	0	0	0	0	0	0	0	0	0	0	0	0	0	0	0	0	1
TCGA-A8-A09D-01	0	0	0	0	0	0	0	0	0	0	0	1	0	0	0	0	0	1	0	0	0	0	0	0	1	0	0	0	0	0	0	0	0	0	0	0	0	0	0	0	0	0	0	0	1
TCGA-A8-A09G-01	0	0	0	0	0	0	0	0	0	0	0	1	0	0	0	0	0	0	0	0	0	0	0	0	1	0	0	0	0	0	0	0	0	0	0	0	0	0	0	0	0	0	0	0	1
TCGA-A8-A09M-01	0	0	0	0	0	0	0	0	0	0	0	1	0	0	0	0	0	1	0	0	0	0	0	0	1	0	0	0	0	0	0	0	0	0	0	0	0	0	0	0	0	0	0	0	1
TCGA-A8-A09N-01	0	0	0	0	0	0	0	0	0	0	0	1	0	0	0	0	0	1	0	0	0	0	0	0	1	0	0	0	0	0	0	0	0	0	0	0	0	0	0	0	0	0	0	0	1
TCGA-A8-A09V-01	0	0	0	0	0	0	0	0	0	0	0	1	0	0	0	0	0	1	0	0	0	0	0	0	1	0	0	0	0	0	0	0	0	0	0	0	0	0	0	0	0	0	0	0	1
TCGA-A8-A09W-01	0	0	0	0	0	0	0	0	0	0	0	1	0	0	0	0	0	1	0	0	0	0	0	0	1	0	0	0	0	0	0	0	0	0	0	0	0	0	0	0	0	0	0	0	1
TCGA-A8-A09Z-01	0	0	0	0	0	0	0	0	0	0	0	1	0	0	0	0	0	1	0	0	0	0	0	0	1	0	0	0	0	0	0	0	0	0	0	0	0	0	0	0	0	0	0	0	1
TCGA-A8-A0A1-01	0	0	0	0	0	0	0	0	0	0	0	1	0	0	0	0	0	1	0	0	0	0	0	0	1	0	0	0	0	0	0	0	0	0	0	0	0	0	0	0	0	0	0	0	1
TCGA-A8-A0A4-01	0	0	0	0	0	0	0	0	0	0	0	1	0	0	0	0	0	1	0	0	0	0	0	0	1	0	0	0	0	0	0	0	0	0	0	0	0	0	0	0	0	0	0	0	1
TCGA-A8-A0A7-01	0	0	0	0	0	0	0	0	0	0	0	1	0	0	0	0	0	0	0	0	0	0	0	0	1	0	0	0	0	0	0	0	0	0	0	0	0	0	0	0	0	0	0	0	1
TCGA-A8-A0AD-01	0	0	0	0	0	0	0	0	0	0	0	1	0	0	0	0	0	1	0	0	0	0	0	0	1	0	0	0	0	0	0	0	0	0	0	0	0	0	0	0	0	0	0	0	1
TCGA-AA-3489-01	0	0	0	0	0	0	0	0	0	0	0	0	0	0	0	0	0	0	0	0	0	0	0	0	1	0	0	0	0	0	0	0	1	0	0	0	0	0	0	0	0	0	1	0	1
TCGA-AA-3492-01	0	0	0	0	0	0	0	0	0	0	0	0	0	0	0	0	0	0	0	0	0	0	0	0	1	0	0	0	0	0	0	0	1	0	0	0	0	0	0	0	0	0	1	0	1
TCGA-AA-3495-01	0	0	0	0	0	0	0	0	0	0	0	0	0	0	0	0	0	0	0	0	0	0	0	0	1	0	0	0	0	0	0	0	1	0	0	0	0	0	0	0	0	0	1	0	1
TCGA-AA-3496-01	0	0	0	0	0	0	0	0	0	0	0	0	0	0	0	0	0	0	0	0	0	0	0	0	1	0	0	0	0	0	0	0	1	0	0	0	0	0	0	0	0	0	1	0	1
TCGA-AA-3502-01	0	0	0	0	0	0	0	0	0	0	0	0	0	0	0	0	0	0	0	0	0	0	0	0	1	0	0	0	0	0	0	0	1	0	0	0	0	0	0	0	0	0	1	0	1
TCGA-AA-3506-01	0	0	0	0	0	0	0	0	0	0	0	0	0	0	0	0	0	0	0	0	0	0	0	0	1	0	0	0	0	0	0	0	1	0	0	0	0	0	0	0	0	0	1	0	1
TCGA-AA-3510-01	0	0	0	0	0	0	0	0	0	0	0	0	0	0	0	0	0	0	0	0	0	0	0	0	1	0	0	0	0	0	0	0	1	0	0	0	0	0	0	0	0	0	1	0	1
TCGA-AA-3514-01	0	0	0	0	0	0	0	0	0	0	0	0	0	0	0	0	0	0	0	0	0	0	0	0	1	0	0	0	0	0	0	0	1	0	0	0	0	0	0	0	0	0	1	0	1
TCGA-AA-3518-01	0	0	0	0	0	0	0	0	0	0	0	0	0	0	0	0	0	0	0	0	0	0	0	0	1	0	0	0	0	0	0	0	1	0	0	0	0	0	0	0	0	0	1	0	1
TCGA-AA-3520-01	0	0	0	0	0	0	0	0	0	0	0	0	0	0	0	0	0	0	0	0	0	0	0	0	1	0	0	0	0	0	0	0	1	0	0	0	0	0	0	0	0	0	1	0	1
TCGA-AA-3522-01	0	0	0	0	0	0	0	0	0	0	0	0	0	0	0	0	0	0	0	0	0	0	0	0	1	0	0	0	0	0	0	0	1	0	0	0	0	0	0	0	0	0	1	0	1
TCGA-AA-3524-01	0	0	0	0	0	0	0	0	0	0	0	0	0	0	0	0	0	0	0	0	0	0	0	0	1	0	0	0	0	0	0	0	1	0	0	0	0	0	0	0	0	0	1	0	1
TCGA-AA-3525-01	0	0	0	0	0	0	0	0	0	0	0	0	0	0	0	0	0	0	0	0	0	0	0	0	1	0	0	0	0	0	0	0	1	0	0	0	0	0	0	0	0	0	1	0	1
TCGA-AA-3526-01	0	0	0	0	0	0	0	0	0	0	0	0	0	0	0	0	0	0	0	0	0	0	0	0	1	0	0	0	0	0	0	0	1	0	0	0	0	0	0	0	0	0	1	0	1
TCGA-AA-3527-01	0	0	0	0	0	0	0	0	0	0	0	0	0	0	0	0	0	0	0	0	0	0	0	0	1	0	0	0	0	0	0	0	1	0	0	0	0	0	0	0	0	0	1	0	1
TCGA-AA-3529-01	0	0	0	0	0	0	0	0	0	0	0	0	0	0	0	0	0	0	0	0	0	0	0	0	1	0	0	0	0	0	0	0	1	0	0	0	0	0	0	0	0	0	1	0	1
TCGA-AA-3530-01	0	0	0	0	0	0	0	0	0	0	0	0	0	0	0	0	0	0	0	0	0	0	0	0	1	0	0	0	0	0	0	0	1	0	0	0	0	0	0	0	0	0	1	0	1
TCGA-AA-3531-01	0	0	0	0	0	0	0	0	0	0	0	0	0	0	0	0	0	0	0	0	0	0	0	0	1	0	0	0	0	0	0	0	1	0	0	0	0	0	0	0	0	0	1	0	1
TCGA-AA-3538-01	0	0	0	0	0	0	0	0	0	0	0	0	0	0	0	0	0	0	0	0	0	0	0	0	1	0	0	0	0	0	0	0	1	0	0	0	0	0	0	0	0	0	1	0	1
TCGA-AA-3543-01	0	0	0	0	0	0	0	0	0	0	0	0	0	0	0	0	0	0	0	0	0	0	0	0	1	0	0	0	0	0	0	0	1	0	0	0	0	0	0	0	0	0	1	0	1
TCGA-AA-3544-01	0	0	0	0	0	0	0	0	0	0	0	0	0	0	0	0	0	0	0	0	0	0	0	0	1	0	0	0	0	0	0	0	1	0	0	0	0	0	0	0	0	0	1	0	1
TCGA-AA-3549-01	0	0	0	0	0	0	0	0	0	0	0	0	0	0	0	0	0	0	0	0	0	0	0	0	1	0	0	0	0	0	0	0	1	0	0	0	0	0	0	0	0	0	1	0	1
TCGA-AA-3555-01	0	0	0	0	0	0	0	0	0	0	0	0	0	0	0	0	0	0	0	0	0	0	0	0	1	0	0	0	0	0	0	0	1	0	0	0	0	0	0	0	0	0	1	0	1
TCGA-AA-3558-01	0	0	0	0	0	0	0	0	0	0	0	0	0	0	0	0	0	0	0	0	0	0	0	0	1	0	0	0	0	0	0	0	1	0	0	0	0	0	0	0	0	0	1	0	1
TCGA-AA-3560-01	0	0	0	0	0	0	0	0	0	0	0	0	0	0	0	0	0	0	0	0	0	0	0	0	1	0	0	0	0	0	0	0	1	0	0	0	0	0	0	0	0	0	1	0	1
TCGA-AA-3655-01	0	0	0	0	0	0	0	0	0	0	0	0	0	0	0	0	0	0	0	0	0	0	0	0	1	0	0	0	0	0	0	0	1	0	0	0	0	0	0	0	0	0	1	0	1
TCGA-AA-3660-01	0	0	0	0	0	0	0	0	0	0	0	0	0	0	0	0	0	0	0	0	0	0	0	0	1	0	0	0	0	0	0	0	1	0	0	0	0	0	0	0	0	0	1	0	1
TCGA-AA-3663-01	0	0	0	0	0	0	0	0	0	0	0	0	0	0	0	0	0	0	0	0	0	0	0	0	1	0	0	0	0	0	0	0	1	0	0	0	0	0	0	0	0	0	1	0	1
TCGA-AA-3664-01	0	0	0	0	0	0	0	0	0	0	0	0	0	0	0	0	0	0	0	0	0	0	0	0	1	0	0	0	0	0	0	0	1	0	0	0	0	0	0	0	0	0	1	0	1
TCGA-AA-3667-01	0	0	0	0	0	0	0	0	0	0	0	0	0	0	0	0	0	0	0	0	0	0	0	0	1	0	0	0	0	0	0	0	1	0	0	0	0	0	0	0	0	0	1	0	1
TCGA-AA-3673-01	0	0	0	0	0	0	0	0	0	0	0	0	0	0	0	0	0	0	0	0	0	0	0	0	1	0	0	0	0	0	0	0	1	0	0	0	0	0	0	0	0	0	1	0	1
TCGA-AA-3675-01	0	0	0	0	0	0	0	0	0	0	0	0	0	0	0	0	0	0	0	0	0	0	0	0	1	0	0	0	0	0	0	0	1	0	0	0	0	0	0	0	0	0	1	0	1
TCGA-AA-3678-01	0	0	0	0	0	0	0	0	0	0	0	0	0	0	0	0	0	0	0	0	0	0	0	0	1	0	0	0	0	0	0	0	1	0	0	0	0	0	0	0	0	0	1	0	1
TCGA-AA-3679-01	0	0	0	0	0	0	0	0	0	0	0	0	0	0	0	0	0	0	0	0	0	0	0	0	1	0	0	0	0	0	0	0	1	0	0	0	0	0	0	0	0	0	1	0	1
TCGA-AA-3681-01	0	0	0	0	0	0	0	0	0	0	0	0	0	0	0	0	0	0	0	0	0	0	0	0	1	0	0	0	0	0	0	0	1	0	0	0	0	0	0	0	0	0	1	0	1
TCGA-AA-3684-01	0	0	0	0	0	0	0	0	0	0	0	0	0	0	0	0	0	0	0	0	0	0	0	0	1	0	0	0	0	0	0	0	1	0	0	0	0	0	0	0	0	0	1	0	1
TCGA-AA-3692-01	0	0	0	0	0	0	0	0	0	0	0	0	0	0	0	0	0	0	0	0	0	0	0	0	1	0	0	0	0	0	0	0	1	0	0	0	0	0	0	0	0	0	1	0	1
TCGA-AA-3693-01	0	0	0	0	0	0	0	0	0	0	0	0	0	0	0	0	0	0	0	0	0	0	0	0	1	0	0	0	0	0	0	0	1	0	0	0	0	0	0	0	0	0	1	0	1
TCGA-AA-3696-01	0	0	0	0	0	0	0	0	0	0	0	0	0	0	0	0	0	0	0	0	0	0	0	0	1	0	0	0	0	0	0	0	1	0	0	0	0	0	0	0	0	0	1	0	1
TCGA-AA-3710-01	0	0	0	0	0	0	0	0	0	0	0	0	0	0	0	0	0	0	0	0	0	0	0	0	1	0	0	0	0	0	0	0	1	0	0	0	0	0	0	0	0	0	1	0	1
TCGA-AA-3713-01	0	0	0	0	0	0	0	0	0	0	0	0	0	0	0	0	0	0	0	0	0	0	0	0	1	0	0	0	0	0	0	0	1	0	0	0	0	0	0	0	0	0	1	0	1
TCGA-AA-3715-01	0	0	0	0	0	0	0	0	0	0	0	0	0	0	0	0	0	0	0	0	0	0	0	0	1	0	0	0	0	0	0	0	1	0	0	0	0	0	0	0	0	0	1	0	1
TCGA-AA-3814-01	0	0	0	0	0	0	0	0	0	0	0	0	0	0	0	0	0	0	0	0	0	0	0	0	1	0	0	0	0	0	0	0	1	0	0	0	0	0	0	0	0	0	1	0	1
TCGA-AA-3818-01	0	0	0	0	0	0	0	0	0	0	0	0	0	0	0	0	0	0	0	0	0	0	0	0	1	0	0	0	0	0	0	0	1	0	0	0	0	0	0	0	0	0	1	0	1
TCGA-AA-3819-01	0	0	0	0	0	0	0	0	0	0	0	0	0	0	0	0	0	0	0	0	0	0	0	0	1	0	0	0	0	0	0	0	1	0	0	0	0	0	0	0	0	0	1	0	1
TCGA-AA-3821-01	0	0	0	0	0	0	0	0	0	0	0	0	0	0	0	0	0	0	0	0	0	0	0	0	1	0	0	0	0	0	0	0	1	0	0	0	0	0	0	0	0	0	1	0	1
TCGA-AA-3831-01	0	0	0	0	0	0	0	0	0	0	0	0	0	0	0	0	0	0	0	0	0	0	0	0	1	0	0	0	0	0	0	0	1	0	0	0	0	0	0	0	0	0	1	0	1
TCGA-AA-3833-01	0	0	0	0	0	0	0	0	0	0	0	0	0	0	0	0	0	0	0	0	0	0	0	0	1	0	0	0	0	0	0	0	1	0	0	0	0	0	0	0	0	0	1	0	1
TCGA-AA-3844-01	0	0	0	0	0	0	0	0	0	0	0	0	0	0	0	0	0	0	0	0	0	0	0	0	1	0	0	0	0	0	0	0	1	0	0	0	0	0	0	0	0	0	1	0	1
TCGA-AA-3845-01	0	0	0	0	0	0	0	0	0	0	0	0	0	0	0	0	0	0	0	0	0	0	0	0	1	0	0	0	0	0	0	0	1	0	0	0	0	0	0	0	0	0	1	0	1
TCGA-AA-3848-01	0	0	0	0	0	0	0	0	0	0	0	0	0	0	0	0	0	0	0	0	0	0	0	0	1	0	0	0	0	0	0	0	1	0	0	0	0	0	0	0	0	0	1	0	1
TCGA-AA-3850-01	0	0	0	0	0	0	0	0	0	0	0	0	0	0	0	0	0	0	0	0	0	0	0	0	1	0	0	0	0	0	0	0	1	0	0	0	0	0	0	0	0	0	1	0	1
TCGA-AA-3852-01	0	0	0	0	0	0	0	0	0	0	0	0	0	0	0	0	0	0	0	0	0	0	0	0	1	0	0	0	0	0	0	0	1	0	0	0	0	0	0	0	0	0	1	0	1
TCGA-AA-3854-01	0	0	0	0	0	0	0	0	0	0	0	0	0	0	0	0	0	0	0	0	0	0	0	0	1	0	0	0	0	0	0	0	1	0	0	0	0	0	0	0	0	0	1	0	1
TCGA-AA-3855-01	0	0	0	0	0	0	0	0	0	0	0	0	0	0	0	0	0	0	0	0	0	0	0	0	1	0	0	0	0	0	0	0	1	0	0	0	0	0	0	0	0	0	1	0	1
TCGA-AA-3864-01	0	0	0	0	0	0	0	0	0	0	0	0	0	0	0	0	0	0	0	0	0	0	0	0	1	0	0	0	0	0	0	0	1	0	0	0	0	0	0	0	0	0	1	0	1
TCGA-AA-3870-01	0	0	0	0	0	0	0	0	0	0	0	0	0	0	0	0	0	0	0	0	0	0	0	0	1	0	0	0	0	0	0	0	1	0	0	0	0	0	0	0	0	0	1	0	1
TCGA-AA-3877-01	0	0	0	0	0	0	0	0	0	0	0	0	0	0	0	0	0	0	0	0	0	0	0	0	1	0	0	0	0	0	0	0	1	0	0	0	0	0	0	0	0	0	1	0	1
TCGA-AA-3930-01	0	0	0	0	0	0	0	0	0	0	0	0	0	0	0	0	0	0	0	0	0	0	0	0	1	0	0	0	0	0	0	0	1	0	0	0	0	0	0	0	0	0	1	0	1
TCGA-AA-3947-01	0	0	0	0	0	0	0	0	0	0	0	0	0	0	0	0	0	0	0	0	0	0	0	0	1	0	0	0	0	0	0	0	1	0	0	0	0	0	0	0	0	0	1	0	1
TCGA-AA-3950-01	0	0	0	0	0	0	0	0	0	0	0	0	0	0	0	0	0	0	0	0	0	0	0	0	1	0	0	0	0	0	0	0	1	0	0	0	0	0	0	0	0	0	1	0	1
TCGA-AA-3952-01	0	0	0	0	0	0	0	0	0	0	0	0	0	0	0	0	0	0	0	0	0	0	0	0	1	0	0	0	0	0	0	0	1	0	0	0	0	0	0	0	0	0	1	0	1
TCGA-AA-3973-01	0	0	0	0	0	0	0	0	0	0	0	0	0	0	0	0	0	0	0	0	0	0	0	0	1	0	0	0	0	0	0	0	1	0	0	0	0	0	0	0	0	0	1	0	1
TCGA-AA-3975-01	0	0	0	0	0	0	0	0	0	0	0	0	0	0	0	0	0	0	0	0	0	0	0	0	1	0	0	0	0	0	0	0	1	0	0	0	0	0	0	0	0	0	1	0	1
TCGA-AA-3977-01	0	0	0	0	0	0	0	0	0	0	0	0	0	0	0	0	0	0	0	0	0	0	0	0	1	0	0	0	0	0	0	0	1	0	0	0	0	0	0	0	0	0	1	0	1
TCGA-AA-3979-01	0	0	0	0	0	0	0	0	0	0	0	0	0	0	0	0	0	0	0	0	0	0	0	0	1	0	0	0	0	0	0	0	1	0	0	0	0	0	0	0	0	0	1	0	1
TCGA-AA-3982-01	0	0	0	0	0	0	0	0	0	0	0	0	0	0	0	0	0	0	0	0	0	0	0	0	1	0	0	0	0	0	0	0	1	0	0	0	0	0	0	0	0	0	1	0	1
TCGA-AA-3984-01	0	0	0	0	0	0	0	0	0	0	0	0	0	0	0	0	0	0	0	0	0	0	0	0	1	0	0	0	0	0	0	0	1	0	0	0	0	0	0	0	0	0	1	0	1
TCGA-AA-3986-01	0	0	0	0	0	0	0	0	0	0	0	0	0	0	0	0	0	0	0	0	0	0	0	0	1	0	0	0	0	0	0	0	1	0	0	0	0	0	0	0	0	0	1	0	1
TCGA-AA-3994-01	0	0	0	0	0	0	0	0	0	0	0	0	0	0	0	0	0	0	0	0	0	0	0	0	1	0	0	0	0	0	0	0	1	0	0	0	0	0	0	0	0	0	1	0	1
TCGA-AA-A004-01	0	0	0	0	0	0	0	0	0	0	0	0	0	0	0	0	0	0	0	0	0	0	0	0	1	0	0	0	0	0	0	0	1	0	0	0	0	0	0	0	0	0	1	0	1
TCGA-AA-A00A-01	0	0	0	0	0	0	0	0	0	0	0	0	0	0	0	0	0	0	0	0	0	0	0	0	1	0	0	0	0	0	0	0	1	0	0	0	0	0	0	0	0	0	1	0	1
TCGA-AA-A00D-01	0	0	0	0	0	0	0	0	0	0	0	0	0	0	0	0	0	0	0	0	0	0	0	0	1	0	0	0	0	0	0	0	1	0	0	0	0	0	0	0	0	0	1	0	1
TCGA-AA-A00E-01	0	0	0	0	0	0	0	0	0	0	0	0	0	0	0	0	0	0	0	0	0	0	0	0	1	0	0	0	0	0	0	0	1	0	0	0	0	0	0	0	0	0	1	0	1
TCGA-AA-A00J-01	0	0	0	0	0	0	0	0	0	0	0	0	0	0	0	0	0	0	0	0	0	0	0	0	1	0	0	0	0	0	0	0	1	0	0	0	0	0	0	0	0	0	1	0	1
TCGA-AA-A00K-01	0	0	0	0	0	0	0	0	0	0	0	0	0	0	0	0	0	0	0	0	0	0	0	0	1	0	0	0	0	0	0	0	1	0	0	0	0	0	0	0	0	0	1	0	1
TCGA-AA-A00L-01	0	0	0	0	0	0	0	0	0	0	0	0	0	0	0	0	0	0	0	0	0	0	0	0	1	0	0	0	0	0	0	0	1	0	0	0	0	0	0	0	0	0	1	0	1
TCGA-AA-A00N-01	0	0	0	0	0	0	0	0	0	0	0	0	0	0	0	0	0	0	0	0	0	0	0	0	1	0	0	0	0	0	0	0	1	0	0	0	0	0	0	0	0	0	1	0	1
TCGA-AA-A00O-01	0	0	0	0	0	0	0	0	0	0	0	0	0	0	0	0	0	0	0	0	0	0	0	0	1	0	0	0	0	0	0	0	1	0	0	0	0	0	0	0	0	0	1	0	1
TCGA-AA-A00R-01	0	0	0	0	0	0	0	0	0	0	0	0	0	0	0	0	0	0	0	0	0	0	0	0	1	0	0	0	0	0	0	0	1	0	0	0	0	0	0	0	0	0	1	0	1
TCGA-AA-A00U-01	0	0	0	0	0	0	0	0	0	0	0	0	0	0	0	0	0	0	0	0	0	0	0	0	1	0	0	0	0	0	0	0	1	0	0	0	0	0	0	0	0	0	1	0	1
TCGA-AA-A00W-01	0	0	0	0	0	0	0	0	0	0	0	0	0	0	0	0	0	0	0	0	0	0	0	0	1	0	0	0	0	0	0	0	1	0	0	0	0	0	0	0	0	0	1	0	1
TCGA-AA-A00Z-01	0	0	0	0	0	0	0	0	0	0	0	0	0	0	0	0	0	0	0	0	0	0	0	0	1	0	0	0	0	0	0	0	1	0	0	0	0	0	0	0	0	0	1	0	1
TCGA-AA-A010-01	0	0	0	0	0	0	0	0	0	0	0	0	0	0	0	0	0	0	0	0	0	0	0	0	1	0	0	0	0	0	0	0	1	0	0	0	0	0	0	0	0	0	1	0	1
TCGA-AA-A017-01	0	0	0	0	0	0	0	0	0	0	0	0	0	0	0	0	0	0	0	0	0	0	0	0	1	0	0	0	0	0	0	0	1	0	0	0	0	0	0	0	0	0	1	0	1
TCGA-AA-A01I-01	0	0	0	0	0	0	0	0	0	0	0	0	0	0	0	0	0	0	0	0	0	0	0	0	1	0	0	0	0	0	0	0	1	0	0	0	0	0	0	0	0	0	1	0	1
TCGA-AA-A01K-01	0	0	0	0	0	0	0	0	0	0	0	0	0	0	0	0	0	0	0	0	0	0	0	0	1	0	0	0	0	0	0	0	1	0	0	0	0	0	0	0	0	0	1	0	1
TCGA-AA-A01P-01	0	0	0	0	0	0	0	0	0	0	0	0	0	0	0	0	0	0	0	0	0	0	0	0	1	0	0	0	0	0	0	0	1	0	0	0	0	0	0	0	0	0	1	0	1
TCGA-AA-A01Q-01	0	0	0	0	0	0	0	0	0	0	0	0	0	0	0	0	0	0	0	0	0	0	0	0	1	0	0	0	0	0	0	0	1	0	0	0	0	0	0	0	0	0	1	0	1
TCGA-AA-A01R-01	0	0	0	0	0	0	0	0	0	0	0	0	0	0	0	0	0	0	0	0	0	0	0	0	1	0	0	0	0	0	0	0	1	0	0	0	0	0	0	0	0	0	1	0	1
TCGA-AA-A01S-01	0	0	0	0	0	0	0	0	0	0	0	0	0	0	0	0	0	0	0	0	0	0	0	0	1	0	0	0	0	0	0	0	1	0	0	0	0	0	0	0	0	0	1	0	1
TCGA-AA-A01V-01	0	0	0	0	0	0	0	0	0	0	0	0	0	0	0	0	0	0	0	0	0	0	0	0	1	0	0	0	0	0	0	0	1	0	0	0	0	0	0	0	0	0	1	0	1
TCGA-AA-A01Z-01	0	0	0	0	0	0	0	0	0	0	0	0	0	0	0	0	0	0	0	0	0	0	0	0	1	0	0	0	0	0	0	0	1	0	0	0	0	0	0	0	0	0	1	0	1
TCGA-AA-A022-01	0	0	0	0	0	0	0	0	0	0	0	0	0	0	0	0	0	0	0	0	0	0	0	0	1	0	0	0	0	0	0	0	1	0	0	0	0	0	0	0	0	0	1	0	1
TCGA-AA-A024-01	0	0	0	0	0	0	0	0	0	0	0	0	0	0	0	0	0	0	0	0	0	0	0	0	1	0	0	0	0	0	0	0	1	0	0	0	0	0	0	0	0	0	1	0	1
TCGA-AA-A029-01	0	0	0	0	0	0	0	0	0	0	0	0	0	0	0	0	0	0	0	0	0	0	0	0	1	0	0	0	0	0	0	0	1	0	0	0	0	0	0	0	0	0	1	0	1
TCGA-AA-A02F-01	0	0	0	0	0	0	0	0	0	0	0	0	0	0	0	0	0	0	0	0	0	0	0	0	1	0	0	0	0	0	0	0	1	0	0	0	0	0	0	0	0	0	1	0	1
TCGA-AA-A02J-01	0	0	0	0	0	0	0	0	0	0	0	0	0	0	0	0	0	0	0	0	0	0	0	0	1	0	0	0	0	0	0	0	1	0	0	0	0	0	0	0	0	0	1	0	1
TCGA-AA-A02O-01	0	0	0	0	0	0	0	0	0	0	0	0	0	0	0	0	0	0	0	0	0	0	0	0	1	0	0	0	0	0	0	0	1	0	0	0	0	0	0	0	0	0	1	0	1
TCGA-AA-A02R-01	0	0	0	0	0	0	0	0	0	0	0	0	0	0	0	0	0	0	0	0	0	0	0	0	1	0	0	0	0	0	0	0	1	0	0	0	0	0	0	0	0	0	1	0	1
TCGA-AA-A02Y-01	0	0	0	0	0	0	0	0	0	0	0	0	0	0	0	0	0	0	0	0	0	0	0	0	1	0	0	0	0	0	0	0	1	0	0	0	0	0	0	0	0	0	1	0	1
TCGA-AA-A03F-01	0	0	0	0	0	0	0	0	0	0	0	0	0	0	0	0	0	0	0	0	0	0	0	0	1	0	0	0	0	0	0	0	1	0	0	0	0	0	0	0	0	0	1	0	1
TCGA-AB-2803-03	0	0	0	0	0	0	0	0	0	0	0	0	0	0	0	0	0	0	0	0	0	0	0	0	1	0	0	0	0	0	0	0	0	0	0	0	0	0	0	0	1	0	0	0	1
TCGA-AB-2805-03	0	0	0	0	0	0	0	0	0	0	0	0	0	0	0	0	0	0	0	0	0	0	0	0	1	0	0	0	0	0	0	0	0	0	0	0	0	0	0	0	1	0	0	0	1
TCGA-AB-2806-03	0	0	0	0	0	0	0	0	0	0	0	0	0	0	0	0	0	0	0	0	0	0	0	0	1	0	0	0	0	0	0	0	0	0	0	0	0	0	0	0	1	0	0	0	1
TCGA-AB-2807-03	0	0	0	0	0	0	0	0	0	0	0	0	0	0	0	0	0	0	0	0	0	0	0	0	1	0	0	0	0	0	0	0	0	0	0	0	0	0	0	0	1	0	0	0	1
TCGA-AB-2808-03	0	0	0	0	0	0	0	0	0	0	0	0	0	0	0	0	0	0	0	0	0	0	0	0	1	0	0	0	0	0	0	0	0	0	0	0	0	0	0	0	1	0	0	0	1
TCGA-AB-2809-03	0	0	0	0	0	0	0	0	0	0	0	0	0	0	0	0	0	0	0	0	0	0	0	0	1	0	0	0	0	0	0	0	0	0	0	0	0	0	0	0	1	0	0	0	1
TCGA-AB-2810-03	0	0	0	0	0	0	0	0	0	0	0	0	0	0	0	0	0	0	0	0	0	0	0	0	1	0	0	0	0	0	0	0	0	0	0	0	0	0	0	0	1	0	0	0	1
TCGA-AB-2812-03	0	0	0	0	0	0	0	0	0	0	0	0	0	0	0	0	0	0	0	0	0	0	0	0	1	0	0	0	0	0	0	0	0	0	0	0	0	0	0	0	1	0	0	0	1
TCGA-AB-2813-03	0	0	0	0	0	0	0	0	0	0	0	0	0	0	0	0	0	0	0	0	0	0	0	0	1	0	0	0	0	0	0	0	0	0	0	0	0	0	0	0	1	0	0	0	1
TCGA-AB-2814-03	0	0	0	0	0	0	0	0	0	0	0	0	0	0	0	0	0	0	0	0	0	0	0	0	1	0	0	0	0	0	0	0	0	0	0	0	0	0	0	0	1	0	0	0	1
TCGA-AB-2816-03	0	0	0	0	0	0	0	0	0	0	0	0	0	0	0	0	0	0	0	0	0	0	0	0	1	0	0	0	0	0	0	0	0	0	0	0	0	0	0	0	1	0	0	0	1
TCGA-AB-2817-03	0	0	0	0	0	0	0	0	0	0	0	0	0	0	0	0	0	0	0	0	0	0	0	0	1	0	0	0	0	0	0	0	0	0	0	0	0	0	0	0	1	0	0	0	1
TCGA-AB-2818-03	0	0	0	0	0	0	0	0	0	0	0	0	0	0	0	0	0	0	0	0	0	0	0	0	1	0	0	0	0	0	0	0	0	0	0	0	0	0	0	0	1	0	0	0	1
TCGA-AB-2819-03	0	0	0	0	0	0	0	0	0	0	0	0	0	0	0	0	0	0	0	0	0	0	0	0	1	0	0	0	0	0	0	0	0	0	0	0	0	0	0	0	1	0	0	0	1
TCGA-AB-2820-03	0	0	0	0	0	0	0	0	0	0	0	0	0	0	0	0	0	0	0	0	0	0	0	0	1	0	0	0	0	0	0	0	0	0	0	0	0	0	0	0	1	0	0	0	1
TCGA-AB-2821-03	0	0	0	0	0	0	0	0	0	0	0	0	0	0	0	0	0	0	0	0	0	0	0	0	1	0	0	0	0	0	0	0	0	0	0	0	0	0	0	0	1	0	0	0	1
TCGA-AB-2822-03	0	0	0	0	0	0	0	0	0	0	0	0	0	0	0	0	0	0	0	0	0	0	0	0	1	0	0	0	0	0	0	0	0	0	0	0	0	0	0	0	1	0	0	0	1
TCGA-AB-2823-03	0	0	0	0	0	0	0	0	0	0	0	0	0	0	0	0	0	0	0	0	0	0	0	0	1	0	0	0	0	0	0	0	0	0	0	0	0	0	0	0	1	0	0	0	1
TCGA-AB-2824-03	0	0	0	0	0	0	0	0	0	0	0	0	0	0	0	0	0	0	0	0	0	0	0	0	1	0	0	0	0	0	0	0	0	0	0	0	0	0	0	0	1	0	0	0	1
TCGA-AB-2825-03	0	0	0	0	0	0	0	0	0	0	0	0	0	0	0	0	0	0	0	0	0	0	0	0	1	0	0	0	0	0	0	0	0	0	0	0	0	0	0	0	1	0	0	0	1
TCGA-AB-2826-03	0	0	0	0	0	0	0	0	0	0	0	0	0	0	0	0	0	0	0	0	0	0	0	0	1	0	0	0	0	0	0	0	0	0	0	0	0	0	0	0	1	0	0	0	1
TCGA-AB-2827-03	0	0	0	0	0	0	0	0	0	0	0	0	0	0	0	0	0	0	0	0	0	0	0	0	1	0	0	0	0	0	0	0	0	0	0	0	0	0	0	0	1	0	0	0	1
TCGA-AB-2828-03	0	0	0	0	0	0	0	0	0	0	0	0	0	0	0	0	0	0	0	0	0	0	0	0	1	0	0	0	0	0	0	0	0	0	0	0	0	0	0	0	1	0	0	0	1
TCGA-AB-2829-03	0	0	0	0	0	0	0	0	0	0	0	0	0	0	0	0	0	0	0	0	0	0	0	0	1	0	0	0	0	0	0	0	0	0	0	0	0	0	0	0	1	0	0	0	1
TCGA-AB-2830-03	0	0	0	0	0	0	0	0	0	0	0	0	0	0	0	0	0	0	0	0	0	0	0	0	1	0	0	0	0	0	0	0	0	0	0	0	0	0	0	0	1	0	0	0	1
TCGA-AB-2832-03	0	0	0	0	0	0	0	0	0	0	0	0	0	0	0	0	0	0	0	0	0	0	0	0	1	0	0	0	0	0	0	0	0	0	0	0	0	0	0	0	1	0	0	0	1
TCGA-AB-2834-03	0	0	0	0	0	0	0	0	0	0	0	0	0	0	0	0	0	0	0	0	0	0	0	0	1	0	0	0	0	0	0	0	0	0	0	0	0	0	0	0	1	0	0	0	1
TCGA-AB-2835-03	0	0	0	0	0	0	0	0	0	0	0	0	0	0	0	0	0	0	0	0	0	0	0	0	1	0	0	0	0	0	0	0	0	0	0	0	0	0	0	0	1	0	0	0	1
TCGA-AB-2838-03	0	0	0	0	0	0	0	0	0	0	0	0	0	0	0	0	0	0	0	0	0	0	0	0	1	0	0	0	0	0	0	0	0	0	0	0	0	0	0	0	1	0	0	0	1
TCGA-AB-2840-03	0	0	0	0	0	0	0	0	0	0	0	0	0	0	0	0	0	0	0	0	0	0	0	0	1	0	0	0	0	0	0	0	0	0	0	0	0	0	0	0	1	0	0	0	1
TCGA-AB-2841-03	0	0	0	0	0	0	0	0	0	0	0	0	0	0	0	0	0	0	0	0	0	0	0	0	1	0	0	0	0	0	0	0	0	0	0	0	0	0	0	0	1	0	0	0	1
TCGA-AB-2842-03	0	0	0	0	0	0	0	0	0	0	0	0	0	0	0	0	0	0	0	0	0	0	0	0	1	0	0	0	0	0	0	0	0	0	0	0	0	0	0	0	1	0	0	0	1
TCGA-AB-2844-03	0	0	0	0	0	0	0	0	0	0	0	0	0	0	0	0	0	0	0	0	0	0	0	0	1	0	0	0	0	0	0	0	0	0	0	0	0	0	0	0	1	0	0	0	1
TCGA-AB-2845-03	0	0	0	0	0	0	0	0	0	0	0	0	0	0	0	0	0	0	0	0	0	0	0	0	1	0	0	0	0	0	0	0	0	0	0	0	0	0	0	0	1	0	0	0	1
TCGA-AB-2846-03	0	0	0	0	0	0	0	0	0	0	0	0	0	0	0	0	0	0	0	0	0	0	0	0	1	0	0	0	0	0	0	0	0	0	0	0	0	0	0	0	1	0	0	0	1
TCGA-AB-2849-03	0	0	0	0	0	0	0	0	0	0	0	0	0	0	0	0	0	0	0	0	0	0	0	0	1	0	0	0	0	0	0	0	0	0	0	0	0	0	0	0	1	0	0	0	1
TCGA-AB-2850-03	0	0	0	0	0	0	0	0	0	0	0	0	0	0	0	0	0	0	0	0	0	0	0	0	1	0	0	0	0	0	0	0	0	0	0	0	0	0	0	0	1	0	0	0	1
TCGA-AB-2851-03	0	0	0	0	0	0	0	0	0	0	0	0	0	0	0	0	0	0	0	0	0	0	0	0	1	0	0	0	0	0	0	0	0	0	0	0	0	0	0	0	1	0	0	0	1
TCGA-AB-2853-03	0	0	0	0	0	0	0	0	0	0	0	0	0	0	0	0	0	0	0	0	0	0	0	0	1	0	0	0	0	0	0	0	0	0	0	0	0	0	0	0	1	0	0	0	1
TCGA-AB-2854-03	0	0	0	0	0	0	0	0	0	0	0	0	0	0	0	0	0	0	0	0	0	0	0	0	1	0	0	0	0	0	0	0	0	0	0	0	0	0	0	0	1	0	0	0	1
TCGA-AB-2855-03	0	0	0	0	0	0	0	0	0	0	0	0	0	0	0	0	0	0	0	0	0	0	0	0	1	0	0	0	0	0	0	0	0	0	0	0	0	0	0	0	1	0	0	0	1
TCGA-AB-2856-03	0	0	0	0	0	0	0	0	0	0	0	0	0	0	0	0	0	0	0	0	0	0	0	0	1	0	0	0	0	0	0	0	0	0	0	0	0	0	0	0	1	0	0	0	1
TCGA-AB-2857-03	0	0	0	0	0	0	0	0	0	0	0	0	0	0	0	0	0	0	0	0	0	0	0	0	1	0	0	0	0	0	0	0	0	0	0	0	0	0	0	0	1	0	0	0	1
TCGA-AB-2858-03	0	0	0	0	0	0	0	0	0	0	0	0	0	0	0	0	0	0	0	0	0	0	0	0	1	0	0	0	0	0	0	0	0	0	0	0	0	0	0	0	1	0	0	0	1
TCGA-AB-2859-03	0	0	0	0	0	0	0	0	0	0	0	0	0	0	0	0	0	0	0	0	0	0	0	0	1	0	0	0	0	0	0	0	0	0	0	0	0	0	0	0	1	0	0	0	1
TCGA-AB-2860-03	0	0	0	0	0	0	0	0	0	0	0	0	0	0	0	0	0	0	0	0	0	0	0	0	1	0	0	0	0	0	0	0	0	0	0	0	0	0	0	0	1	0	0	0	1
TCGA-AB-2861-03	0	0	0	0	0	0	0	0	0	0	0	0	0	0	0	0	0	0	0	0	0	0	0	0	1	0	0	0	0	0	0	0	0	0	0	0	0	0	0	0	1	0	0	0	1
TCGA-AB-2862-03	0	0	0	0	0	0	0	0	0	0	0	0	0	0	0	0	0	0	0	0	0	0	0	0	1	0	0	0	0	0	0	0	0	0	0	0	0	0	0	0	1	0	0	0	1
TCGA-AB-2863-03	0	0	0	0	0	0	0	0	0	0	0	0	0	0	0	0	0	0	0	0	0	0	0	0	1	0	0	0	0	0	0	0	0	0	0	0	0	0	0	0	1	0	0	0	1
TCGA-AB-2864-03	0	0	0	0	0	0	0	0	0	0	0	0	0	0	0	0	0	0	0	0	0	0	0	0	1	0	0	0	0	0	0	0	0	0	0	0	0	0	0	0	1	0	0	0	1
TCGA-AB-2865-03	0	0	0	0	0	0	0	0	0	0	0	0	0	0	0	0	0	0	0	0	0	0	0	0	1	0	0	0	0	0	0	0	0	0	0	0	0	0	0	0	1	0	0	0	1
TCGA-AB-2867-03	0	0	0	0	0	0	0	0	0	0	0	0	0	0	0	0	0	0	0	0	0	0	0	0	1	0	0	0	0	0	0	0	0	0	0	0	0	0	0	0	1	0	0	0	1
TCGA-AB-2868-03	0	0	0	0	0	0	0	0	0	0	0	0	0	0	0	0	0	0	0	0	0	0	0	0	1	0	0	0	0	0	0	0	0	0	0	0	0	0	0	0	1	0	0	0	1
TCGA-AB-2869-03	0	0	0	0	0	0	0	0	0	0	0	0	0	0	0	0	0	0	0	0	0	0	0	0	1	0	0	0	0	0	0	0	0	0	0	0	0	0	0	0	1	0	0	0	1
TCGA-AB-2870-03	0	0	0	0	0	0	0	0	0	0	0	0	0	0	0	0	0	0	0	0	0	0	0	0	1	0	0	0	0	0	0	0	0	0	0	0	0	0	0	0	1	0	0	0	1
TCGA-AB-2872-03	0	0	0	0	0	0	0	0	0	0	0	0	0	0	0	0	0	0	0	0	0	0	0	0	1	0	0	0	0	0	0	0	0	0	0	0	0	0	0	0	1	0	0	0	1
TCGA-AB-2873-03	0	0	0	0	0	0	0	0	0	0	0	0	0	0	0	0	0	0	0	0	0	0	0	0	1	0	0	0	0	0	0	0	0	0	0	0	0	0	0	0	1	0	0	0	1
TCGA-AB-2875-03	0	0	0	0	0	0	0	0	0	0	0	0	0	0	0	0	0	0	0	0	0	0	0	0	1	0	0	0	0	0	0	0	0	0	0	0	0	0	0	0	1	0	0	0	1
TCGA-AB-2878-03	0	0	0	0	0	0	0	0	0	0	0	0	0	0	0	0	0	0	0	0	0	0	0	0	1	0	0	0	0	0	0	0	0	0	0	0	0	0	0	0	1	0	0	0	1
TCGA-AB-2879-03	0	0	0	0	0	0	0	0	0	0	0	0	0	0	0	0	0	0	0	0	0	0	0	0	1	0	0	0	0	0	0	0	0	0	0	0	0	0	0	0	1	0	0	0	1
TCGA-AB-2880-03	0	0	0	0	0	0	0	0	0	0	0	0	0	0	0	0	0	0	0	0	0	0	0	0	1	0	0	0	0	0	0	0	0	0	0	0	0	0	0	0	1	0	0	0	1
TCGA-AB-2882-03	0	0	0	0	0	0	0	0	0	0	0	0	0	0	0	0	0	0	0	0	0	0	0	0	1	0	0	0	0	0	0	0	0	0	0	0	0	0	0	0	1	0	0	0	1
TCGA-AB-2883-03	0	0	0	0	0	0	0	0	0	0	0	0	0	0	0	0	0	0	0	0	0	0	0	0	1	0	0	0	0	0	0	0	0	0	0	0	0	0	0	0	1	0	0	0	1
TCGA-AB-2885-03	0	0	0	0	0	0	0	0	0	0	0	0	0	0	0	0	0	0	0	0	0	0	0	0	1	0	0	0	0	0	0	0	0	0	0	0	0	0	0	0	1	0	0	0	1
TCGA-AB-2886-03	0	0	0	0	0	0	0	0	0	0	0	0	0	0	0	0	0	0	0	0	0	0	0	0	1	0	0	0	0	0	0	0	0	0	0	0	0	0	0	0	1	0	0	0	1
TCGA-AB-2887-03	0	0	0	0	0	0	0	0	0	0	0	0	0	0	0	0	0	0	0	0	0	0	0	0	1	0	0	0	0	0	0	0	0	0	0	0	0	0	0	0	1	0	0	0	1
TCGA-AB-2888-03	0	0	0	0	0	0	0	0	0	0	0	0	0	0	0	0	0	0	0	0	0	0	0	0	1	0	0	0	0	0	0	0	0	0	0	0	0	0	0	0	1	0	0	0	1
TCGA-AB-2889-03	0	0	0	0	0	0	0	0	0	0	0	0	0	0	0	0	0	0	0	0	0	0	0	0	1	0	0	0	0	0	0	0	0	0	0	0	0	0	0	0	1	0	0	0	1
TCGA-AB-2890-03	0	0	0	0	0	0	0	0	0	0	0	0	0	0	0	0	0	0	0	0	0	0	0	0	1	0	0	0	0	0	0	0	0	0	0	0	0	0	0	0	1	0	0	0	1
TCGA-AB-2892-03	0	0	0	0	0	0	0	0	0	0	0	0	0	0	0	0	0	0	0	0	0	0	0	0	1	0	0	0	0	0	0	0	0	0	0	0	0	0	0	0	1	0	0	0	1
TCGA-AB-2893-03	0	0	0	0	0	0	0	0	0	0	0	0	0	0	0	0	0	0	0	0	0	0	0	0	1	0	0	0	0	0	0	0	0	0	0	0	0	0	0	0	1	0	0	0	1
TCGA-AB-2894-03	0	0	0	0	0	0	0	0	0	0	0	0	0	0	0	0	0	0	0	0	0	0	0	0	1	0	0	0	0	0	0	0	0	0	0	0	0	0	0	0	1	0	0	0	1
TCGA-AB-2895-03	0	0	0	0	0	0	0	0	0	0	0	0	0	0	0	0	0	0	0	0	0	0	0	0	1	0	0	0	0	0	0	0	0	0	0	0	0	0	0	0	1	0	0	0	1
TCGA-AB-2896-03	0	0	0	0	0	0	0	0	0	0	0	0	0	0	0	0	0	0	0	0	0	0	0	0	1	0	0	0	0	0	0	0	0	0	0	0	0	0	0	0	1	0	0	0	1
TCGA-AB-2897-03	0	0	0	0	0	0	0	0	0	0	0	0	0	0	0	0	0	0	0	0	0	0	0	0	1	0	0	0	0	0	0	0	0	0	0	0	0	0	0	0	1	0	0	0	1
TCGA-AB-2898-03	0	0	0	0	0	0	0	0	0	0	0	0	0	0	0	0	0	0	0	0	0	0	0	0	1	0	0	0	0	0	0	0	0	0	0	0	0	0	0	0	1	0	0	0	1
TCGA-AB-2899-03	0	0	0	0	0	0	0	0	0	0	0	0	0	0	0	0	0	0	0	0	0	0	0	0	1	0	0	0	0	0	0	0	0	0	0	0	0	0	0	0	1	0	0	0	1
TCGA-AB-2900-03	0	0	0	0	0	0	0	0	0	0	0	0	0	0	0	0	0	0	0	0	0	0	0	0	1	0	0	0	0	0	0	0	0	0	0	0	0	0	0	0	1	0	0	0	1
TCGA-AB-2901-03	0	0	0	0	0	0	0	0	0	0	0	0	0	0	0	0	0	0	0	0	0	0	0	0	1	0	0	0	0	0	0	0	0	0	0	0	0	0	0	0	1	0	0	0	1
TCGA-AB-2903-03	0	0	0	0	0	0	0	0	0	0	0	0	0	0	0	0	0	0	0	0	0	0	0	0	1	0	0	0	0	0	0	0	0	0	0	0	0	0	0	0	1	0	0	0	1
TCGA-AB-2904-03	0	0	0	0	0	0	0	0	0	0	0	0	0	0	0	0	0	0	0	0	0	0	0	0	1	0	0	0	0	0	0	0	0	0	0	0	0	0	0	0	1	0	0	0	1
TCGA-AB-2908-03	0	0	0	0	0	0	0	0	0	0	0	0	0	0	0	0	0	0	0	0	0	0	0	0	1	0	0	0	0	0	0	0	0	0	0	0	0	0	0	0	1	0	0	0	1
TCGA-AB-2909-03	0	0	0	0	0	0	0	0	0	0	0	0	0	0	0	0	0	0	0	0	0	0	0	0	1	0	0	0	0	0	0	0	0	0	0	0	0	0	0	0	1	0	0	0	1
TCGA-AB-2910-03	0	0	0	0	0	0	0	0	0	0	0	0	0	0	0	0	0	0	0	0	0	0	0	0	1	0	0	0	0	0	0	0	0	0	0	0	0	0	0	0	1	0	0	0	1
TCGA-AB-2911-03	0	0	0	0	0	0	0	0	0	0	0	0	0	0	0	0	0	0	0	0	0	0	0	0	1	0	0	0	0	0	0	0	0	0	0	0	0	0	0	0	1	0	0	0	1
TCGA-AB-2912-03	0	0	0	0	0	0	0	0	0	0	0	0	0	0	0	0	0	0	0	0	0	0	0	0	1	0	0	0	0	0	0	0	0	0	0	0	0	0	0	0	1	0	0	0	1
TCGA-AB-2913-03	0	0	0	0	0	0	0	0	0	0	0	0	0	0	0	0	0	0	0	0	0	0	0	0	1	0	0	0	0	0	0	0	0	0	0	0	0	0	0	0	1	0	0	0	1
TCGA-AB-2916-03	0	0	0	0	0	0	0	0	0	0	0	0	0	0	0	0	0	0	0	0	0	0	0	0	1	0	0	0	0	0	0	0	0	0	0	0	0	0	0	0	1	0	0	0	1
TCGA-AB-2919-03	0	0	0	0	0	0	0	0	0	0	0	0	0	0	0	0	0	0	0	0	0	0	0	0	1	0	0	0	0	0	0	0	0	0	0	0	0	0	0	0	1	0	0	0	1
TCGA-AB-2920-03	0	0	0	0	0	0	0	0	0	0	0	0	0	0	0	0	0	0	0	0	0	0	0	0	1	0	0	0	0	0	0	0	0	0	0	0	0	0	0	0	1	0	0	0	1
TCGA-AB-2921-03	0	0	0	0	0	0	0	0	0	0	0	0	0	0	0	0	0	0	0	0	0	0	0	0	1	0	0	0	0	0	0	0	0	0	0	0	0	0	0	0	1	0	0	0	1
TCGA-AB-2922-03	0	0	0	0	0	0	0	0	0	0	0	0	0	0	0	0	0	0	0	0	0	0	0	0	1	0	0	0	0	0	0	0	0	0	0	0	0	0	0	0	1	0	0	0	1
TCGA-AB-2923-03	0	0	0	0	0	0	0	0	0	0	0	0	0	0	0	0	0	0	0	0	0	0	0	0	1	0	0	0	0	0	0	0	0	0	0	0	0	0	0	0	1	0	0	0	1
TCGA-AB-2924-03	0	0	0	0	0	0	0	0	0	0	0	0	0	0	0	0	0	0	0	0	0	0	0	0	1	0	0	0	0	0	0	0	0	0	0	0	0	0	0	0	1	0	0	0	1
TCGA-AB-2925-03	0	0	0	0	0	0	0	0	0	0	0	0	0	0	0	0	0	0	0	0	0	0	0	0	1	0	0	0	0	0	0	0	0	0	0	0	0	0	0	0	1	0	0	0	1
TCGA-AB-2926-03	0	0	0	0	0	0	0	0	0	0	0	0	0	0	0	0	0	0	0	0	0	0	0	0	1	0	0	0	0	0	0	0	0	0	0	0	0	0	0	0	1	0	0	0	1
TCGA-AB-2927-03	0	0	0	0	0	0	0	0	0	0	0	0	0	0	0	0	0	0	0	0	0	0	0	0	1	0	0	0	0	0	0	0	0	0	0	0	0	0	0	0	1	0	0	0	1
TCGA-AB-2928-03	0	0	0	0	0	0	0	0	0	0	0	0	0	0	0	0	0	0	0	0	0	0	0	0	1	0	0	0	0	0	0	0	0	0	0	0	0	0	0	0	1	0	0	0	1
TCGA-AB-2929-03	0	0	0	0	0	0	0	0	0	0	0	0	0	0	0	0	0	0	0	0	0	0	0	0	1	0	0	0	0	0	0	0	0	0	0	0	0	0	0	0	1	0	0	0	1
TCGA-AB-2930-03	0	0	0	0	0	0	0	0	0	0	0	0	0	0	0	0	0	0	0	0	0	0	0	0	1	0	0	0	0	0	0	0	0	0	0	0	0	0	0	0	1	0	0	0	1
TCGA-AB-2931-03	0	0	0	0	0	0	0	0	0	0	0	0	0	0	0	0	0	0	0	0	0	0	0	0	1	0	0	0	0	0	0	0	0	0	0	0	0	0	0	0	1	0	0	0	1
TCGA-AB-2932-03	0	0	0	0	0	0	0	0	0	0	0	0	0	0	0	0	0	0	0	0	0	0	0	0	1	0	0	0	0	0	0	0	0	0	0	0	0	0	0	0	1	0	0	0	1
TCGA-AB-2933-03	0	0	0	0	0	0	0	0	0	0	0	0	0	0	0	0	0	0	0	0	0	0	0	0	1	0	0	0	0	0	0	0	0	0	0	0	0	0	0	0	1	0	0	0	1
TCGA-AB-2934-03	0	0	0	0	0	0	0	0	0	0	0	0	0	0	0	0	0	0	0	0	0	0	0	0	1	0	0	0	0	0	0	0	0	0	0	0	0	0	0	0	1	0	0	0	1
TCGA-AB-2935-03	0	0	0	0	0	0	0	0	0	0	0	0	0	0	0	0	0	0	0	0	0	0	0	0	1	0	0	0	0	0	0	0	0	0	0	0	0	0	0	0	1	0	0	0	1
TCGA-AB-2937-03	0	0	0	0	0	0	0	0	0	0	0	0	0	0	0	0	0	0	0	0	0	0	0	0	1	0	0	0	0	0	0	0	0	0	0	0	0	0	0	0	1	0	0	0	1
TCGA-AB-2938-03	0	0	0	0	0	0	0	0	0	0	0	0	0	0	0	0	0	0	0	0	0	0	0	0	1	0	0	0	0	0	0	0	0	0	0	0	0	0	0	0	1	0	0	0	1
TCGA-AB-2940-03	0	0	0	0	0	0	0	0	0	0	0	0	0	0	0	0	0	0	0	0	0	0	0	0	1	0	0	0	0	0	0	0	0	0	0	0	0	0	0	0	1	0	0	0	1
TCGA-AB-2943-03	0	0	0	0	0	0	0	0	0	0	0	0	0	0	0	0	0	0	0	0	0	0	0	0	1	0	0	0	0	0	0	0	0	0	0	0	0	0	0	0	1	0	0	0	1
TCGA-AB-2944-03	0	0	0	0	0	0	0	0	0	0	0	0	0	0	0	0	0	0	0	0	0	0	0	0	1	0	0	0	0	0	0	0	0	0	0	0	0	0	0	0	1	0	0	0	1
TCGA-AB-2945-03	0	0	0	0	0	0	0	0	0	0	0	0	0	0	0	0	0	0	0	0	0	0	0	0	1	0	0	0	0	0	0	0	0	0	0	0	0	0	0	0	1	0	0	0	1
TCGA-AB-2946-03	0	0	0	0	0	0	0	0	0	0	0	0	0	0	0	0	0	0	0	0	0	0	0	0	1	0	0	0	0	0	0	0	0	0	0	0	0	0	0	0	1	0	0	0	1
TCGA-AB-2947-03	0	0	0	0	0	0	0	0	0	0	0	0	0	0	0	0	0	0	0	0	0	0	0	0	1	0	0	0	0	0	0	0	0	0	0	0	0	0	0	0	1	0	0	0	1
TCGA-AB-2948-03	0	0	0	0	0	0	0	0	0	0	0	0	0	0	0	0	0	0	0	0	0	0	0	0	1	0	0	0	0	0	0	0	0	0	0	0	0	0	0	0	1	0	0	0	1
TCGA-AB-2949-03	0	0	0	0	0	0	0	0	0	0	0	0	0	0	0	0	0	0	0	0	0	0	0	0	1	0	0	0	0	0	0	0	0	0	0	0	0	0	0	0	1	0	0	0	1
TCGA-AB-2950-03	0	0	0	0	0	0	0	0	0	0	0	0	0	0	0	0	0	0	0	0	0	0	0	0	1	0	0	0	0	0	0	0	0	0	0	0	0	0	0	0	1	0	0	0	1
TCGA-AB-2952-03	0	0	0	0	0	0	0	0	0	0	0	0	0	0	0	0	0	0	0	0	0	0	0	0	1	0	0	0	0	0	0	0	0	0	0	0	0	0	0	0	1	0	0	0	1
TCGA-AB-2954-03	0	0	0	0	0	0	0	0	0	0	0	0	0	0	0	0	0	0	0	0	0	0	0	0	1	0	0	0	0	0	0	0	0	0	0	0	0	0	0	0	1	0	0	0	1
TCGA-AB-2956-03	0	0	0	0	0	0	0	0	0	0	0	0	0	0	0	0	0	0	0	0	0	0	0	0	1	0	0	0	0	0	0	0	0	0	0	0	0	0	0	0	1	0	0	0	1
TCGA-AB-2959-03	0	0	0	0	0	0	0	0	0	0	0	0	0	0	0	0	0	0	0	0	0	0	0	0	1	0	0	0	0	0	0	0	0	0	0	0	0	0	0	0	1	0	0	0	1
TCGA-AC-A23C-01	0	0	0	0	0	0	0	0	0	0	0	1	0	0	0	0	0	0	0	0	0	0	0	0	1	0	0	0	0	0	0	0	0	0	0	0	0	0	0	0	0	0	0	0	1
TCGA-AC-A2B8-01	0	0	0	0	0	0	0	0	0	0	0	1	0	0	0	0	0	0	0	0	0	0	0	0	1	0	0	0	0	0	0	0	0	0	0	0	0	0	0	0	0	0	0	0	1
TCGA-AC-A2FB-01	0	0	0	0	0	0	0	0	0	0	0	1	0	0	0	0	0	0	0	0	0	0	0	0	1	0	0	0	0	0	0	0	0	0	0	0	0	0	0	0	0	0	0	0	1
TCGA-AC-A2FE-01	0	0	0	0	0	0	0	0	0	0	0	1	0	0	0	0	0	0	0	0	0	0	0	0	1	0	0	0	0	0	0	0	0	0	0	0	0	0	0	0	0	0	0	0	1
TCGA-AC-A2FF-01	0	0	0	0	0	0	0	0	0	0	0	1	0	0	0	0	0	0	0	0	0	0	0	0	1	0	0	0	0	0	0	0	0	0	0	0	0	0	0	0	0	0	0	0	1
TCGA-AC-A2FG-01	0	0	0	0	0	0	0	0	0	0	0	1	0	0	0	0	0	0	0	0	0	0	0	0	1	0	0	0	0	0	0	0	0	0	0	0	0	0	0	0	0	0	0	0	1
TCGA-AC-A2FK-01	0	0	0	0	0	0	0	0	0	0	0	1	0	0	0	0	0	0	0	0	0	0	0	0	1	0	0	0	0	0	0	0	0	0	0	0	0	0	0	0	0	0	0	0	1
TCGA-AC-A2FM-01	0	0	0	0	0	0	0	0	0	0	0	1	0	0	0	0	0	0	0	0	0	0	0	0	1	0	0	0	0	0	0	0	0	0	0	0	0	0	0	0	0	0	0	0	1
TCGA-AC-A2FO-01	0	0	0	0	0	0	0	0	0	0	0	1	0	0	0	0	0	0	0	0	0	0	0	0	1	0	0	0	0	0	0	0	0	0	0	0	0	0	0	0	0	0	0	0	1
TCGA-AC-A2QI-01	0	0	0	0	0	0	0	0	0	0	0	1	0	0	0	0	0	0	0	0	0	0	0	0	1	0	0	0	0	0	0	0	0	0	0	0	0	0	0	0	0	0	0	0	1
TCGA-AC-A3HN-01	0	0	0	0	0	0	0	0	0	0	0	1	0	0	0	0	0	0	0	0	0	0	0	0	1	0	0	0	0	0	0	0	0	0	0	0	0	0	0	0	0	0	0	0	1
TCGA-AC-A3OD-01	0	0	0	0	0	0	0	0	0	0	0	1	0	0	0	0	0	0	0	0	0	0	0	0	1	0	0	0	0	0	0	0	0	0	0	0	0	0	0	0	0	0	0	0	1
TCGA-AC-A3QP-01	0	0	0	0	0	0	0	0	0	0	0	1	0	0	0	0	0	0	0	0	0	0	0	0	1	0	0	0	0	0	0	0	0	0	0	0	0	0	0	0	0	0	0	0	1
TCGA-AC-A3QQ-01	0	0	0	0	0	0	0	0	0	0	0	1	0	0	0	0	0	0	0	0	0	0	0	0	1	0	0	0	0	0	0	0	0	0	0	0	0	0	0	0	0	0	0	0	1
TCGA-AC-A3TM-01	0	0	0	0	0	0	0	0	0	0	0	1	0	0	0	0	0	0	0	0	0	0	0	0	1	0	0	0	0	0	0	0	0	0	0	0	0	0	0	0	0	0	0	0	1
TCGA-AC-A3TN-01	0	0	0	0	0	0	0	0	0	0	0	1	0	0	0	0	0	0	0	0	0	0	0	0	1	0	0	0	0	0	0	0	0	0	0	0	0	0	0	0	0	0	0	0	1
TCGA-AC-A3W6-01	0	0	0	0	0	0	0	0	0	0	0	1	0	0	0	0	0	0	0	0	0	0	0	0	1	0	0	0	0	0	0	0	0	0	0	0	0	0	0	0	0	0	0	0	1
TCGA-AC-A3W7-01	0	0	0	0	0	0	0	0	0	0	0	1	0	0	0	0	0	0	0	0	0	0	0	0	1	0	0	0	0	0	0	0	0	0	0	0	0	0	0	0	0	0	0	0	1
TCGA-AC-A3YI-01	0	0	0	0	0	0	0	0	0	0	0	1	0	0	0	0	0	0	0	0	0	0	0	0	1	0	0	0	0	0	0	0	0	0	0	0	0	0	0	0	0	0	0	0	1
TCGA-AC-A3YJ-01	0	0	0	0	0	0	0	0	0	0	0	1	0	0	0	0	0	0	0	0	0	0	0	0	1	0	0	0	0	0	0	0	0	0	0	0	0	0	0	0	0	0	0	0	1
TCGA-AC-A5XS-01	0	0	0	0	0	0	0	0	0	0	0	1	0	0	0	0	0	0	0	0	0	0	0	0	1	0	0	0	0	0	0	0	0	0	0	0	0	0	0	0	0	0	0	0	1
TCGA-AC-A5XU-01	0	0	0	0	0	0	0	0	0	0	0	1	0	0	0	0	0	0	0	0	0	0	0	0	1	0	0	0	0	0	0	0	0	0	0	0	0	0	0	0	0	0	0	0	1
TCGA-AC-A6IV-01	0	0	0	0	0	0	0	0	0	0	0	1	0	0	0	0	0	0	0	0	0	0	0	0	1	0	0	0	0	0	0	0	0	0	0	0	0	0	0	0	0	0	0	0	1
TCGA-AC-A6IW-01	0	0	0	0	0	0	0	0	0	0	0	1	0	0	0	0	0	0	0	0	0	0	0	0	1	0	0	0	0	0	0	0	0	0	0	0	0	0	0	0	0	0	0	0	1
TCGA-AC-A6IX-01	0	0	0	0	0	0	0	0	0	0	0	1	0	0	0	0	0	0	0	0	0	0	0	0	1	0	0	0	0	0	0	0	0	0	0	0	0	0	0	0	0	0	0	0	1
TCGA-AC-A6IX-06	0	0	0	0	0	0	0	0	0	0	0	1	0	0	0	0	0	0	0	0	0	0	0	0	1	0	0	0	0	0	0	0	0	0	0	0	0	0	0	0	0	0	0	0	1
TCGA-AC-A6NO-01	0	0	0	0	0	0	0	0	0	0	0	1	0	0	0	0	0	0	0	0	0	0	0	0	1	0	0	0	0	0	0	0	0	0	0	0	0	0	0	0	0	0	0	0	1
TCGA-AC-A7VB-01	0	0	0	0	0	0	0	0	0	0	0	1	0	0	0	0	0	0	0	0	0	0	0	0	1	0	0	0	0	0	0	0	0	0	0	0	0	0	0	0	0	0	0	0	1
TCGA-AC-A7VC-01	0	0	0	0	0	0	0	0	0	0	0	1	0	0	0	0	0	0	0	0	0	0	0	0	1	0	0	0	0	0	0	0	0	0	0	0	0	0	0	0	0	0	0	0	1
TCGA-AC-A8OR-01	0	0	0	0	0	0	0	0	0	0	0	1	0	0	0	0	0	0	0	0	0	0	0	0	1	0	0	0	0	0	0	0	0	0	0	0	0	0	0	0	0	0	0	0	1
TCGA-AC-A8OS-01	0	0	0	0	0	0	0	0	0	0	0	1	0	0	0	0	0	0	0	0	0	0	0	0	1	0	0	0	0	0	0	0	0	0	0	0	0	0	0	0	0	0	0	0	1
TCGA-AD-5900-01	0	0	0	0	0	0	0	0	0	0	0	0	0	0	0	0	0	0	0	0	0	0	0	0	1	0	0	0	0	0	0	0	1	0	0	0	0	0	0	0	0	0	1	0	1
TCGA-AD-6548-01	0	0	0	0	0	0	0	0	0	0	0	0	0	0	0	0	0	0	0	0	0	0	0	0	1	0	0	0	0	0	0	0	1	0	0	0	0	0	0	0	0	0	1	0	1
TCGA-AD-6889-01	0	0	0	0	0	0	0	0	0	0	0	0	0	0	0	0	0	0	0	0	0	0	0	0	1	0	0	0	0	0	0	0	1	0	0	0	0	0	0	0	0	0	1	0	1
TCGA-AD-6895-01	0	0	0	0	0	0	0	0	0	0	0	0	0	0	0	0	0	0	0	0	0	0	0	0	1	0	0	0	0	0	0	0	1	0	0	0	0	0	0	0	0	0	1	0	1
TCGA-AD-6964-01	0	0	0	0	0	0	0	0	0	0	0	0	0	0	0	0	0	0	0	0	0	0	0	0	1	0	0	0	0	0	0	0	1	0	0	0	0	0	0	0	0	0	1	0	1
TCGA-AD-A5EJ-01	0	0	0	0	0	0	0	0	0	0	0	0	0	0	0	0	0	0	0	0	0	0	0	0	1	0	0	0	0	0	0	0	1	0	0	0	0	0	0	0	0	0	1	0	1
TCGA-AF-2691-01	0	0	1	0	0	0	0	0	0	0	0	0	0	0	0	0	0	0	0	0	0	0	0	0	1	0	0	0	0	0	0	0	1	0	0	0	0	0	0	0	0	0	0	0	1
TCGA-AF-2693-01	0	0	1	0	0	0	0	0	0	0	0	0	0	0	0	0	0	0	0	0	0	0	0	0	1	0	0	0	0	0	0	0	1	0	0	0	0	0	0	0	0	0	0	0	1
TCGA-AF-5654-01	0	0	1	0	0	0	0	0	0	0	0	0	0	0	0	0	0	0	0	0	0	0	0	0	1	0	0	0	0	0	0	0	1	0	0	0	0	0	0	0	0	0	0	0	1
TCGA-AF-6655-01	0	0	1	0	0	0	0	0	0	0	0	0	0	0	0	0	0	0	0	0	0	0	0	0	1	0	0	0	0	0	0	0	1	0	0	0	0	0	0	0	0	0	0	0	1
TCGA-AF-A56N-01	0	0	1	0	0	0	0	0	0	0	0	0	0	0	0	0	0	0	0	0	0	0	0	0	1	0	0	0	0	0	0	0	1	0	0	0	0	0	0	0	0	0	0	0	1
TCGA-AG-3574-01	0	0	1	0	0	0	0	0	0	0	0	0	0	0	0	0	0	0	0	0	0	0	0	0	1	0	0	0	0	0	0	0	1	0	0	0	0	0	0	0	0	0	0	0	1
TCGA-AG-3575-01	0	0	1	0	0	0	0	0	0	0	0	0	0	0	0	0	0	0	0	0	0	0	0	0	1	0	0	0	0	0	0	0	1	0	0	0	0	0	0	0	0	0	0	0	1
TCGA-AG-3580-01	0	0	1	0	0	0	0	0	0	0	0	0	0	0	0	0	0	0	0	0	0	0	0	0	1	0	0	0	0	0	0	0	1	0	0	0	0	0	0	0	0	0	0	0	1
TCGA-AG-3581-01	0	0	1	0	0	0	0	0	0	0	0	0	0	0	0	0	0	0	0	0	0	0	0	0	1	0	0	0	0	0	0	0	1	0	0	0	0	0	0	0	0	0	0	0	1
TCGA-AG-3584-01	0	0	1	0	0	0	0	0	0	0	0	0	0	0	0	0	0	0	0	0	0	0	0	0	1	0	0	0	0	0	0	0	1	0	0	0	0	0	0	0	0	0	0	0	1
TCGA-AG-3586-01	0	0	1	0	0	0	0	0	0	0	0	0	0	0	0	0	0	0	0	0	0	0	0	0	1	0	0	0	0	0	0	0	1	0	0	0	0	0	0	0	0	0	0	0	1
TCGA-AG-3594-01	0	0	1	0	0	0	0	0	0	0	0	0	0	0	0	0	0	0	0	0	0	0	0	0	1	0	0	0	0	0	0	0	1	0	0	0	0	0	0	0	0	0	0	0	1
TCGA-AG-3598-01	0	0	1	0	0	0	0	0	0	0	0	0	0	0	0	0	0	0	0	0	0	0	0	0	1	0	0	0	0	0	0	0	1	0	0	0	0	0	0	0	0	0	0	0	1
TCGA-AG-3599-01	0	0	1	0	0	0	0	0	0	0	0	0	0	0	0	0	0	0	0	0	0	0	0	0	1	0	0	0	0	0	0	0	1	0	0	0	0	0	0	0	0	0	0	0	1
TCGA-AG-3602-01	0	0	1	0	0	0	0	0	0	0	0	0	0	0	0	0	0	0	0	0	0	0	0	0	1	0	0	0	0	0	0	0	1	0	0	0	0	0	0	0	0	0	0	0	1
TCGA-AG-3605-01	0	0	1	0	0	0	0	0	0	0	0	0	0	0	0	0	0	0	0	0	0	0	0	0	1	0	0	0	0	0	0	0	1	0	0	0	0	0	0	0	0	0	0	0	1
TCGA-AG-3608-01	0	0	1	0	0	0	0	0	0	0	0	0	0	0	0	0	0	0	0	0	0	0	0	0	1	0	0	0	0	0	0	0	1	0	0	0	0	0	0	0	0	0	0	0	1
TCGA-AG-3726-01	0	0	1	0	0	0	0	0	0	0	0	0	0	0	0	0	0	0	0	0	0	0	0	0	1	0	0	0	0	0	0	0	1	0	0	0	0	0	0	0	0	0	0	0	1
TCGA-AG-3727-01	0	0	1	0	0	0	0	0	0	0	0	0	0	0	0	0	0	0	0	0	0	0	0	0	1	0	0	0	0	0	0	0	1	0	0	0	0	0	0	0	0	0	0	0	1
TCGA-AG-3732-01	0	0	1	0	0	0	0	0	0	0	0	0	0	0	0	0	0	0	0	0	0	0	0	0	1	0	0	0	0	0	0	0	1	0	0	0	0	0	0	0	0	0	0	0	1
TCGA-AG-3742-01	0	0	1	0	0	0	0	0	0	0	0	0	0	0	0	0	0	0	0	0	0	0	0	0	1	0	0	0	0	0	0	0	1	0	0	0	0	0	0	0	0	0	0	0	1
TCGA-AG-3878-01	0	0	1	0	0	0	0	0	0	0	0	0	0	0	0	0	0	0	0	0	0	0	0	0	1	0	0	0	0	0	0	0	1	0	0	0	0	0	0	0	0	0	0	0	1
TCGA-AG-3887-01	0	0	1	0	0	0	0	0	0	0	0	0	0	0	0	0	0	0	0	0	0	0	0	0	1	0	0	0	0	0	0	0	1	0	0	0	0	0	0	0	0	0	0	0	1
TCGA-AG-3890-01	0	0	1	0	0	0	0	0	0	0	0	0	0	0	0	0	0	0	0	0	0	0	0	0	1	0	0	0	0	0	0	0	1	0	0	0	0	0	0	0	0	0	0	0	1
TCGA-AG-3892-01	0	0	1	0	0	0	0	0	0	0	0	0	0	0	0	0	0	0	0	0	0	0	0	0	1	0	0	0	0	0	0	0	1	0	0	0	0	0	0	0	0	0	0	0	1
TCGA-AG-3893-01	0	0	1	0	0	0	0	0	0	0	0	0	0	0	0	0	0	0	0	0	0	0	0	0	1	0	0	0	0	0	0	0	1	0	0	0	0	0	0	0	0	0	0	0	1
TCGA-AG-3894-01	0	0	1	0	0	0	0	0	0	0	0	0	0	0	0	0	0	0	0	0	0	0	0	0	1	0	0	0	0	0	0	0	1	0	0	0	0	0	0	0	0	0	0	0	1
TCGA-AG-3901-01	0	0	1	0	0	0	0	0	0	0	0	0	0	0	0	0	0	0	0	0	0	0	0	0	1	0	0	0	0	0	0	0	1	0	0	0	0	0	0	0	0	0	0	0	1
TCGA-AG-3902-01	0	0	1	0	0	0	0	0	0	0	0	0	0	0	0	0	0	0	0	0	0	0	0	0	1	0	0	0	0	0	0	0	1	0	0	0	0	0	0	0	0	0	0	0	1
TCGA-AG-4021-01	0	0	1	0	0	0	0	0	0	0	0	0	0	0	0	0	0	0	0	0	0	0	0	0	1	0	0	0	0	0	0	0	1	0	0	0	0	0	0	0	0	0	0	0	1
TCGA-AG-A002-01	0	0	1	0	0	0	0	0	0	0	0	0	0	0	0	0	0	0	0	0	0	0	0	0	1	0	0	0	0	0	0	0	1	0	0	0	0	0	0	0	0	0	0	0	1
TCGA-AG-A00C-01	0	0	1	0	0	0	0	0	0	0	0	0	0	0	0	0	0	0	0	0	0	0	0	0	1	0	0	0	0	0	0	0	1	0	0	0	0	0	0	0	0	0	0	0	1
TCGA-AG-A00Y-01	0	0	1	0	0	0	0	0	0	0	0	0	0	0	0	0	0	0	0	0	0	0	0	0	1	0	0	0	0	0	0	0	1	0	0	0	0	0	0	0	0	0	0	0	1
TCGA-AG-A011-01	0	0	1	0	0	0	0	0	0	0	0	0	0	0	0	0	0	0	0	0	0	0	0	0	1	0	0	0	0	0	0	0	1	0	0	0	0	0	0	0	0	0	0	0	1
TCGA-AG-A015-01	0	0	1	0	0	0	0	0	0	0	0	0	0	0	0	0	0	0	0	0	0	0	0	0	1	0	0	0	0	0	0	0	1	0	0	0	0	0	0	0	0	0	0	0	1
TCGA-AG-A01J-01	0	0	1	0	0	0	0	0	0	0	0	0	0	0	0	0	0	0	0	0	0	0	0	0	1	0	0	0	0	0	0	0	1	0	0	0	0	0	0	0	0	0	0	0	1
TCGA-AG-A01Y-01	0	0	1	0	0	0	0	0	0	0	0	0	0	0	0	0	0	0	0	0	0	0	0	0	1	0	0	0	0	0	0	0	1	0	0	0	0	0	0	0	0	0	0	0	1
TCGA-AG-A020-01	0	0	1	0	0	0	0	0	0	0	0	0	0	0	0	0	0	0	0	0	0	0	0	0	1	0	0	0	0	0	0	0	1	0	0	0	0	0	0	0	0	0	0	0	1
TCGA-AG-A025-01	0	0	1	0	0	0	0	0	0	0	0	0	0	0	0	0	0	0	0	0	0	0	0	0	1	0	0	0	0	0	0	0	1	0	0	0	0	0	0	0	0	0	0	0	1
TCGA-AG-A02N-01	0	0	1	0	0	0	0	0	0	0	0	0	0	0	0	0	0	0	0	0	0	0	0	0	1	0	0	0	0	0	0	0	1	0	0	0	0	0	0	0	0	0	0	0	1
TCGA-AH-6547-01	0	0	1	0	0	0	0	0	0	0	0	0	0	0	0	0	0	0	0	0	0	0	0	0	1	0	0	0	0	0	0	0	1	0	0	0	0	0	0	0	0	0	0	0	1
TCGA-AH-6903-01	0	0	1	0	0	0	0	0	0	0	0	0	0	0	0	0	0	0	0	0	0	0	0	0	1	0	0	0	0	0	0	0	1	0	0	0	0	0	0	0	0	0	0	0	1
TCGA-AJ-A23O-01	0	0	0	0	0	0	0	0	0	0	0	0	0	0	0	0	0	0	0	0	0	0	0	0	1	0	0	0	0	0	1	0	0	0	0	0	0	0	0	0	0	0	0	0	1
TCGA-AJ-A2QK-01	0	0	0	0	0	0	0	0	0	0	0	0	0	0	0	0	0	0	0	0	0	0	0	0	1	0	0	0	0	0	1	0	0	0	0	0	0	0	0	0	0	0	0	0	1
TCGA-AJ-A2QL-01	0	0	0	0	0	0	0	0	0	0	0	0	0	0	0	0	0	0	0	0	0	0	0	0	1	0	0	0	0	0	1	0	0	0	0	0	0	0	0	0	0	0	0	0	1
TCGA-AJ-A2QN-01	0	0	0	0	0	0	0	0	0	0	0	0	0	0	0	0	0	0	0	0	0	0	0	0	1	0	0	0	0	0	1	0	0	0	0	0	0	0	0	0	0	0	0	0	1
TCGA-AJ-A2QO-01	0	0	0	0	0	0	0	0	0	0	0	0	0	0	0	0	0	0	0	0	0	0	0	0	1	0	0	0	0	0	1	0	0	0	0	0	0	0	0	0	0	0	0	0	1
TCGA-AJ-A3BF-01	0	0	0	0	0	0	0	0	0	0	0	0	0	0	0	0	0	0	0	0	0	0	0	0	1	0	0	0	0	0	1	0	0	0	0	0	0	0	0	0	0	0	0	0	1
TCGA-AJ-A3BG-01	0	0	0	0	0	0	0	0	0	0	0	0	0	0	0	0	0	0	0	0	0	0	0	0	1	0	0	0	0	0	1	0	0	0	0	0	0	0	0	0	0	0	0	0	1
TCGA-AJ-A3BH-01	0	0	0	0	0	0	0	0	0	0	0	0	0	0	0	0	0	0	0	0	0	0	0	0	1	0	0	0	0	0	1	0	0	0	0	0	0	0	0	0	0	0	0	0	1
TCGA-AJ-A3BK-01	0	0	0	0	0	0	0	0	0	0	0	0	0	0	0	0	0	0	0	0	0	0	0	0	1	0	0	0	0	0	1	0	0	0	0	0	0	0	0	0	0	0	0	0	1
TCGA-AJ-A3EK-01	0	0	0	0	0	0	0	0	0	0	0	0	0	0	0	0	0	0	0	0	0	0	0	0	1	0	0	0	0	0	1	0	0	0	0	0	0	0	0	0	0	0	0	0	1
TCGA-AJ-A3EL-01	0	0	0	0	0	0	0	0	0	0	0	0	0	0	0	0	0	0	0	0	0	0	0	0	1	0	0	0	0	0	1	0	0	0	0	0	0	0	0	0	0	0	0	0	1
TCGA-AJ-A3I9-01	0	0	0	0	0	0	0	0	0	0	0	0	0	0	0	0	0	0	0	0	0	0	0	0	1	0	0	0	0	0	1	0	0	0	0	0	0	0	0	0	0	0	0	0	1
TCGA-AJ-A3NC-01	0	0	0	0	0	0	0	0	0	0	0	0	0	0	0	0	0	0	0	0	0	0	0	0	1	0	0	0	0	0	1	0	0	0	0	0	0	0	0	0	0	0	0	0	1
TCGA-AJ-A3NE-01	0	0	0	0	0	0	0	0	0	0	0	0	0	0	0	0	0	0	0	0	0	0	0	0	1	0	0	0	0	0	1	0	0	0	0	0	0	0	0	0	0	0	0	0	1
TCGA-AJ-A3NG-01	0	0	0	0	0	0	0	0	0	0	0	0	0	0	0	0	0	0	0	0	0	0	0	0	1	0	0	0	0	0	1	0	0	0	0	0	0	0	0	0	0	0	0	0	1
TCGA-AJ-A3OJ-01	0	0	0	0	0	0	0	0	0	0	0	0	0	0	0	0	0	0	0	0	0	0	0	0	1	0	0	0	0	0	1	0	0	0	0	0	0	0	0	0	0	0	0	0	1
TCGA-AJ-A3OK-01	0	0	0	0	0	0	0	0	0	0	0	0	0	0	0	0	0	0	0	0	0	0	0	0	1	0	0	0	0	0	1	0	0	0	0	0	0	0	0	0	0	0	0	0	1
TCGA-AJ-A3OL-01	0	0	0	0	0	0	0	0	0	0	0	0	0	0	0	0	0	0	0	0	0	0	0	0	1	0	0	0	0	0	1	0	0	0	0	0	0	0	0	0	0	0	0	0	1
TCGA-AJ-A5DV-01	0	0	0	0	0	0	0	0	0	0	0	0	0	0	0	0	0	0	0	0	0	0	0	0	1	0	0	0	0	0	1	0	0	0	0	0	0	0	0	0	0	0	0	0	1
TCGA-AJ-A5DW-01	0	0	0	0	0	0	0	0	0	0	0	0	0	0	0	0	0	0	0	0	0	0	0	0	1	0	0	0	0	0	1	0	0	0	0	0	0	0	0	0	0	0	0	0	1
TCGA-AJ-A6NU-01	0	0	0	0	0	0	0	0	0	0	0	0	0	0	0	0	0	0	0	0	0	0	0	0	1	0	0	0	0	0	1	0	0	0	0	0	0	0	0	0	0	0	0	0	1
TCGA-AJ-A8CT-01	0	0	0	0	0	0	0	0	0	0	0	0	0	0	0	0	0	0	0	0	0	0	0	0	1	0	0	0	0	0	1	0	0	0	0	0	0	0	0	0	0	0	0	0	1
TCGA-AJ-A8CV-01	0	0	0	0	0	0	0	0	0	0	0	0	0	0	0	0	0	0	0	0	0	0	0	0	1	0	0	0	0	0	1	0	0	0	0	0	0	0	0	0	0	0	0	0	1
TCGA-AJ-A8CW-01	0	0	0	0	0	0	0	0	0	0	0	0	0	0	0	0	0	0	0	0	0	0	0	0	1	0	0	0	0	0	1	0	0	0	0	0	0	0	0	0	0	0	0	0	1
TCGA-AK-3426-01	0	0	0	0	0	0	0	0	0	0	0	0	0	1	0	0	0	0	0	0	0	1	0	0	1	0	0	0	0	0	0	0	0	0	0	0	0	0	0	0	0	0	0	0	1
TCGA-AK-3427-01	0	0	0	0	0	0	0	0	0	0	0	0	0	1	0	0	0	0	0	0	0	1	0	0	1	0	0	0	0	0	0	0	0	0	0	0	0	0	0	0	0	0	0	0	1
TCGA-AK-3428-01	0	0	0	0	0	0	0	0	0	0	0	0	0	1	0	0	0	0	0	0	0	1	0	0	1	0	0	0	0	0	0	0	0	0	0	0	0	0	0	0	0	0	0	0	1
TCGA-AK-3431-01	0	0	0	0	0	0	0	0	0	0	0	0	0	1	0	0	0	0	0	0	0	1	0	0	1	0	0	0	0	0	0	0	0	0	0	0	0	0	0	0	0	0	0	0	1
TCGA-AK-3433-01	0	0	0	0	0	0	0	0	0	0	0	0	0	1	0	0	0	0	0	0	0	1	0	0	1	0	0	0	0	0	0	0	0	0	0	0	0	0	0	0	0	0	0	0	1
TCGA-AK-3440-01	0	0	0	0	0	0	0	0	0	0	0	0	0	1	0	0	0	0	0	0	0	1	0	0	1	0	0	0	0	0	0	0	0	0	0	0	0	0	0	0	0	0	0	0	1
TCGA-AK-3443-01	0	0	0	0	0	0	0	0	0	0	0	0	0	1	0	0	0	0	0	0	0	1	0	0	1	0	0	0	0	0	0	0	0	0	0	0	0	0	0	0	0	0	0	0	1
TCGA-AK-3444-01	0	0	0	0	0	0	0	0	0	0	0	0	0	1	0	0	0	0	0	0	0	1	0	0	1	0	0	0	0	0	0	0	0	0	0	0	0	0	0	0	0	0	0	0	1
TCGA-AK-3445-01	0	0	0	0	0	0	0	0	0	0	0	0	0	1	0	0	0	0	0	0	0	1	0	0	1	0	0	0	0	0	0	0	0	0	0	0	0	0	0	0	0	0	0	0	1
TCGA-AK-3447-01	0	0	0	0	0	0	0	0	0	0	0	0	0	1	0	0	0	0	0	0	0	1	0	0	1	0	0	0	0	0	0	0	0	0	0	0	0	0	0	0	0	0	0	0	1
TCGA-AK-3450-01	0	0	0	0	0	0	0	0	0	0	0	0	0	1	0	0	0	0	0	0	0	1	0	0	1	0	0	0	0	0	0	0	0	0	0	0	0	0	0	0	0	0	0	0	1
TCGA-AK-3451-01	0	0	0	0	0	0	0	0	0	0	0	0	0	1	0	0	0	0	0	0	0	1	0	0	1	0	0	0	0	0	0	0	0	0	0	0	0	0	0	0	0	0	0	0	1
TCGA-AK-3454-01	0	0	0	0	0	0	0	0	0	0	0	0	0	1	0	0	0	0	0	0	0	1	0	0	1	0	0	0	0	0	0	0	0	0	0	0	0	0	0	0	0	0	0	0	1
TCGA-AK-3455-01	0	0	0	0	0	0	0	0	0	0	0	0	0	1	0	0	0	0	0	0	0	1	0	0	1	0	0	0	0	0	0	0	0	0	0	0	0	0	0	0	0	0	0	0	1
TCGA-AK-3456-01	0	0	0	0	0	0	0	0	0	0	0	0	0	1	0	0	0	0	0	0	0	1	0	0	1	0	0	0	0	0	0	0	0	0	0	0	0	0	0	0	0	0	0	0	1
TCGA-AK-3460-01	0	0	0	0	0	0	0	0	0	0	0	0	0	1	0	0	0	0	0	0	0	1	0	0	1	0	0	0	0	0	0	0	0	0	0	0	0	0	0	0	0	0	0	0	1
TCGA-AK-3465-01	0	0	0	0	0	0	0	0	0	0	0	0	0	1	0	0	0	0	0	0	0	1	0	0	1	0	0	0	0	0	0	0	0	0	0	0	0	0	0	0	0	0	0	0	1
TCGA-AL-3467-01	0	0	0	0	0	0	0	0	0	0	0	0	0	1	0	0	0	0	0	0	0	0	0	0	1	0	0	0	0	0	0	0	0	0	0	0	0	0	1	0	0	0	0	0	1
TCGA-AL-3472-01	0	0	0	0	0	0	0	0	0	0	0	0	0	1	0	0	0	0	0	0	0	0	0	0	1	0	0	0	0	0	0	0	0	0	0	0	0	0	1	0	0	0	0	0	1
TCGA-AL-3473-01	0	0	0	0	0	0	0	0	0	0	0	0	0	1	0	0	0	0	0	0	0	0	0	0	1	0	0	0	0	0	0	0	0	0	0	0	0	0	1	0	0	0	0	0	1
TCGA-AL-7173-01	0	0	0	0	0	0	0	0	0	0	0	0	0	1	0	0	0	0	0	0	0	0	0	0	1	0	0	0	0	0	0	0	0	0	0	0	0	0	1	0	0	0	0	0	1
TCGA-AM-5820-01	0	0	0	0	0	0	0	0	0	0	0	0	0	0	0	0	0	0	0	0	0	0	0	0	1	0	0	0	0	0	0	0	1	0	0	0	0	0	0	0	0	0	1	0	1
TCGA-AM-5821-01	0	0	0	0	0	0	0	0	0	0	0	0	0	0	0	0	0	0	0	0	0	0	0	0	1	0	0	0	0	0	0	0	1	0	0	0	0	0	0	0	0	0	1	0	1
TCGA-AN-A03X-01	0	0	0	0	0	0	0	0	0	0	0	1	0	0	0	0	0	1	0	0	0	0	0	0	1	0	0	0	0	0	0	0	0	0	0	0	0	0	0	0	0	0	0	0	1
TCGA-AN-A049-01	0	0	0	0	0	0	0	0	0	0	0	1	0	0	0	0	0	1	0	0	0	0	0	0	1	0	0	0	0	0	0	0	0	0	0	0	0	0	0	0	0	0	0	0	1
TCGA-AN-A04D-01	0	0	0	0	0	0	0	0	0	0	0	1	0	0	0	0	0	0	1	0	0	0	0	0	1	0	0	0	0	0	0	0	0	0	0	0	0	0	0	0	0	0	0	0	1
TCGA-AN-A0AL-01	0	0	0	0	0	0	0	0	0	0	0	1	0	0	0	0	0	0	1	0	0	0	0	0	1	0	0	0	0	0	0	0	0	0	0	0	0	0	0	0	0	0	0	0	1
TCGA-AN-A0AR-01	0	0	0	0	0	0	0	0	0	0	0	1	0	0	0	0	0	0	1	0	0	0	0	0	1	0	0	0	0	0	0	0	0	0	0	0	0	0	0	0	0	0	0	0	1
TCGA-AN-A0AT-01	0	0	0	0	0	0	0	0	0	0	0	1	0	0	0	0	0	0	1	0	0	0	0	0	1	0	0	0	0	0	0	0	0	0	0	0	0	0	0	0	0	0	0	0	1
TCGA-AN-A0FD-01	0	0	0	0	0	0	0	0	0	0	0	1	0	0	0	0	0	1	0	0	0	0	0	0	1	0	0	0	0	0	0	0	0	0	0	0	0	0	0	0	0	0	0	0	1
TCGA-AN-A0FF-01	0	0	0	0	0	0	0	0	0	0	0	1	0	0	0	0	0	1	0	0	0	0	0	0	1	0	0	0	0	0	0	0	0	0	0	0	0	0	0	0	0	0	0	0	1
TCGA-AN-A0FJ-01	0	0	0	0	0	0	0	0	0	0	0	1	0	0	0	0	0	0	1	0	0	0	0	0	1	0	0	0	0	0	0	0	0	0	0	0	0	0	0	0	0	0	0	0	1
TCGA-AN-A0FL-01	0	0	0	0	0	0	0	0	0	0	0	1	0	0	0	0	0	0	1	0	0	0	0	0	1	0	0	0	0	0	0	0	0	0	0	0	0	0	0	0	0	0	0	0	1
TCGA-AN-A0FN-01	0	0	0	0	0	0	0	0	0	0	0	1	0	0	0	0	0	1	0	0	0	0	0	0	1	0	0	0	0	0	0	0	0	0	0	0	0	0	0	0	0	0	0	0	1
TCGA-AN-A0FS-01	0	0	0	0	0	0	0	0	0	0	0	1	0	0	0	0	0	1	0	0	0	0	0	0	1	0	0	0	0	0	0	0	0	0	0	0	0	0	0	0	0	0	0	0	1
TCGA-AN-A0FZ-01	0	0	0	0	0	0	0	0	0	0	0	1	0	0	0	0	0	1	0	0	0	0	0	0	1	0	0	0	0	0	0	0	0	0	0	0	0	0	0	0	0	0	0	0	1
TCGA-AN-A0XL-01	0	0	0	0	0	0	0	0	0	0	0	1	0	0	0	0	0	1	0	0	0	0	0	0	1	0	0	0	0	0	0	0	0	0	0	0	0	0	0	0	0	0	0	0	1
TCGA-AN-A0XO-01	0	0	0	0	0	0	0	0	0	0	0	1	0	0	0	0	0	1	0	0	0	0	0	0	1	0	0	0	0	0	0	0	0	0	0	0	0	0	0	0	0	0	0	0	1
TCGA-AN-A0XR-01	0	0	0	0	0	0	0	0	0	0	0	1	0	0	0	0	0	1	0	0	0	0	0	0	1	0	0	0	0	0	0	0	0	0	0	0	0	0	0	0	0	0	0	0	1
TCGA-AN-A0XT-01	0	0	0	0	0	0	0	0	0	0	0	1	0	0	0	0	0	1	0	0	0	0	0	0	1	0	0	0	0	0	0	0	0	0	0	0	0	0	0	0	0	0	0	0	1
TCGA-AN-A0XV-01	0	0	0	0	0	0	0	0	0	0	0	1	0	0	0	0	0	1	0	0	0	0	0	0	1	0	0	0	0	0	0	0	0	0	0	0	0	0	0	0	0	0	0	0	1
TCGA-AN-A0XW-01	0	0	0	0	0	0	0	0	0	0	0	1	0	0	0	0	0	1	0	0	0	0	0	0	1	0	0	0	0	0	0	0	0	0	0	0	0	0	0	0	0	0	0	0	1
TCGA-AO-A03R-01	0	0	0	0	0	0	0	0	0	0	0	1	0	0	0	0	0	0	0	0	0	0	0	0	1	0	0	0	0	0	0	0	0	0	0	0	0	0	0	0	0	0	0	0	1
TCGA-AO-A03T-01	0	0	0	0	0	0	0	0	0	0	0	1	0	0	0	0	0	0	0	0	0	0	0	0	1	0	0	0	0	0	0	0	0	0	0	0	0	0	0	0	0	0	0	0	1
TCGA-AO-A03U-01	0	0	0	0	0	0	0	0	0	0	0	1	0	0	0	0	0	0	0	0	0	0	0	0	1	0	0	0	0	0	0	0	0	0	0	0	0	0	0	0	0	0	0	0	1
TCGA-AO-A03V-01	0	0	0	0	0	0	0	0	0	0	0	1	0	0	0	0	0	1	0	0	0	0	0	0	1	0	0	0	0	0	0	0	0	0	0	0	0	0	0	0	0	0	0	0	1
TCGA-AO-A0J5-01	0	0	0	0	0	0	0	0	0	0	0	1	0	0	0	0	0	0	0	0	0	0	0	0	1	0	0	0	0	0	0	0	0	0	0	0	0	0	0	0	0	0	0	0	1
TCGA-AO-A0J6-01	0	0	0	0	0	0	0	0	0	0	0	1	0	0	0	0	0	0	1	0	0	0	0	0	1	0	0	0	0	0	0	0	0	0	0	0	0	0	0	0	0	0	0	0	1
TCGA-AO-A0J7-01	0	0	0	0	0	0	0	0	0	0	0	1	0	0	0	0	0	1	0	0	0	0	0	0	1	0	0	0	0	0	0	0	0	0	0	0	0	0	0	0	0	0	0	0	1
TCGA-AO-A0J8-01	0	0	0	0	0	0	0	0	0	0	0	1	0	0	0	0	0	1	0	0	0	0	0	0	1	0	0	0	0	0	0	0	0	0	0	0	0	0	0	0	0	0	0	0	1
TCGA-AO-A0JA-01	0	0	0	0	0	0	0	0	0	0	0	1	0	0	0	0	0	1	0	0	0	0	0	0	1	0	0	0	0	0	0	0	0	0	0	0	0	0	0	0	0	0	0	0	1
TCGA-AO-A0JB-01	0	0	0	0	0	0	0	0	0	0	0	1	0	0	0	0	0	0	0	0	0	0	0	0	1	0	0	0	0	0	0	0	0	0	0	0	0	0	0	0	0	0	0	0	1
TCGA-AO-A0JD-01	0	0	0	0	0	0	0	0	0	0	0	1	0	0	0	0	0	1	0	0	0	0	0	0	1	0	0	0	0	0	0	0	0	0	0	0	0	0	0	0	0	0	0	0	1
TCGA-AO-A0JE-01	0	0	0	0	0	0	0	0	0	0	0	1	0	0	0	0	0	0	0	0	0	0	0	0	1	0	0	0	0	0	0	0	0	0	0	0	0	0	0	0	0	0	0	0	1
TCGA-AO-A0JF-01	0	0	0	0	0	0	0	0	0	0	0	1	0	0	0	0	0	1	0	0	0	0	0	0	1	0	0	0	0	0	0	0	0	0	0	0	0	0	0	0	0	0	0	0	1
TCGA-AO-A0JG-01	0	0	0	0	0	0	0	0	0	0	0	1	0	0	0	0	0	1	0	0	0	0	0	0	1	0	0	0	0	0	0	0	0	0	0	0	0	0	0	0	0	0	0	0	1
TCGA-AO-A0JI-01	0	0	0	0	0	0	0	0	0	0	0	1	0	0	0	0	0	1	0	0	0	0	0	0	1	0	0	0	0	0	0	0	0	0	0	0	0	0	0	0	0	0	0	0	1
TCGA-AO-A0JJ-01	0	0	0	0	0	0	0	0	0	0	0	1	0	0	0	0	0	1	0	0	0	0	0	0	1	0	0	0	0	0	0	0	0	0	0	0	0	0	0	0	0	0	0	0	1
TCGA-AO-A125-01	0	0	0	0	0	0	0	0	0	0	0	1	0	0	0	0	0	1	0	0	0	0	0	0	1	0	0	0	0	0	0	0	0	0	0	0	0	0	0	0	0	0	0	0	1
TCGA-AO-A126-01	0	0	0	0	0	0	0	0	0	0	0	1	0	0	0	0	0	1	0	0	0	0	0	0	1	0	0	0	0	0	0	0	0	0	0	0	0	0	0	0	0	0	0	0	1
TCGA-AO-A129-01	0	0	0	0	0	0	0	0	0	0	0	1	0	0	0	0	0	0	1	0	0	0	0	0	1	0	0	0	0	0	0	0	0	0	0	0	0	0	0	0	0	0	0	0	1
TCGA-AO-A12E-01	0	0	0	0	0	0	0	0	0	0	0	1	0	0	0	0	0	1	0	0	0	0	0	0	1	0	0	0	0	0	0	0	0	0	0	0	0	0	0	0	0	0	0	0	1
TCGA-AO-A12G-01	0	0	0	0	0	0	0	0	0	0	0	1	0	0	0	0	0	1	0	0	0	0	0	0	1	0	0	0	0	0	0	0	0	0	0	0	0	0	0	0	0	0	0	0	1
TCGA-AO-A12H-01	0	0	0	0	0	0	0	0	0	0	0	1	0	0	0	0	0	1	0	0	0	0	0	0	1	0	0	0	0	0	0	0	0	0	0	0	0	0	0	0	0	0	0	0	1
TCGA-AO-A1KP-01	0	0	0	0	0	0	0	0	0	0	0	1	0	0	0	0	0	0	0	0	0	0	0	0	1	0	0	0	0	0	0	0	0	0	0	0	0	0	0	0	0	0	0	0	1
TCGA-AO-A1KT-01	0	0	0	0	0	0	0	0	0	0	0	1	0	0	0	0	0	0	0	0	0	0	0	0	1	0	0	0	0	0	0	0	0	0	0	0	0	0	0	0	0	0	0	0	1
TCGA-AP-A051-01	0	0	0	0	0	0	0	0	0	0	0	0	0	0	0	0	0	0	0	0	0	0	0	0	1	0	0	0	0	0	1	0	0	0	0	0	0	0	0	0	0	0	0	0	1
TCGA-AP-A052-01	0	0	0	0	0	0	0	0	0	0	0	0	0	0	0	0	0	0	0	0	0	0	0	0	1	0	0	0	0	0	1	0	0	0	0	0	0	0	0	0	0	0	0	0	1
TCGA-AP-A054-01	0	0	0	0	0	0	0	0	0	0	0	0	0	0	0	0	0	0	0	0	0	0	0	0	1	0	0	0	0	0	1	0	0	0	0	0	0	0	0	0	0	0	0	0	1
TCGA-AP-A056-01	0	0	0	0	0	0	0	0	0	0	0	0	0	0	0	0	0	0	0	0	0	0	0	0	1	0	0	0	0	0	1	0	0	0	0	0	0	0	0	0	0	0	0	0	1
TCGA-AP-A059-01	0	0	0	0	0	0	0	0	0	0	0	0	0	0	0	0	0	0	0	0	0	0	0	0	1	0	0	0	0	0	1	0	0	0	0	0	0	0	0	0	0	0	0	0	1
TCGA-AP-A05A-01	0	0	0	0	0	0	0	0	0	0	0	0	0	0	0	0	0	0	0	0	0	0	0	0	1	0	0	0	0	0	1	0	0	0	0	0	0	0	0	0	0	0	0	0	1
TCGA-AP-A05J-01	0	0	0	0	0	0	0	0	0	0	0	0	0	0	0	0	0	0	0	0	0	0	0	0	1	0	0	0	0	0	1	0	0	0	0	0	0	0	0	0	0	0	0	0	1
TCGA-AP-A05N-01	0	0	0	0	0	0	0	0	0	0	0	0	0	0	0	0	0	0	0	0	0	0	0	0	1	0	0	0	0	0	1	0	0	0	0	0	0	0	0	0	0	0	0	0	1
TCGA-AP-A05O-01	0	0	0	0	0	0	0	0	0	0	0	0	0	0	0	0	0	0	0	0	0	0	0	0	1	0	0	0	0	0	1	0	0	0	0	0	0	0	0	0	0	0	0	0	1
TCGA-AP-A05P-01	0	0	0	0	0	0	0	0	0	0	0	0	0	0	0	0	0	0	0	0	0	0	0	0	1	0	0	0	0	0	1	0	0	0	0	0	0	0	0	0	0	0	0	0	1
TCGA-AP-A0LD-01	0	0	0	0	0	0	0	0	0	0	0	0	0	0	0	0	0	0	0	0	0	0	0	0	1	0	0	0	0	0	1	0	0	0	0	0	0	0	0	0	0	0	0	0	1
TCGA-AP-A0LE-01	0	0	0	0	0	0	0	0	0	0	0	0	0	0	0	0	0	0	0	0	0	0	0	0	1	0	0	0	0	0	1	0	0	0	0	0	0	0	0	0	0	0	0	0	1
TCGA-AP-A0LG-01	0	0	0	0	0	0	0	0	0	0	0	0	0	0	0	0	0	0	0	0	0	0	0	0	1	0	0	0	0	0	1	0	0	0	0	0	0	0	0	0	0	0	0	0	1
TCGA-AP-A0LH-01	0	0	0	0	0	0	0	0	0	0	0	0	0	0	0	0	0	0	0	0	0	0	0	0	1	0	0	0	0	0	1	0	0	0	0	0	0	0	0	0	0	0	0	0	1
TCGA-AP-A0LJ-01	0	0	0	0	0	0	0	0	0	0	0	0	0	0	0	0	0	0	0	0	0	0	0	0	1	0	0	0	0	0	1	0	0	0	0	0	0	0	0	0	0	0	0	0	1
TCGA-AP-A0LL-01	0	0	0	0	0	0	0	0	0	0	0	0	0	0	0	0	0	0	0	0	0	0	0	0	1	0	0	0	0	0	1	0	0	0	0	0	0	0	0	0	0	0	0	0	1
TCGA-AP-A0LM-01	0	0	0	0	0	0	0	0	0	0	0	0	0	0	0	0	0	0	0	0	0	0	0	0	1	0	0	0	0	0	1	0	0	0	0	0	0	0	0	0	0	0	0	0	1
TCGA-AP-A0LN-01	0	0	0	0	0	0	0	0	0	0	0	0	0	0	0	0	0	0	0	0	0	0	0	0	1	0	0	0	0	0	1	0	0	0	0	0	0	0	0	0	0	0	0	0	1
TCGA-AP-A0LO-01	0	0	0	0	0	0	0	0	0	0	0	0	0	0	0	0	0	0	0	0	0	0	0	0	1	0	0	0	0	0	1	0	0	0	0	0	0	0	0	0	0	0	0	0	1
TCGA-AP-A0LP-01	0	0	0	0	0	0	0	0	0	0	0	0	0	0	0	0	0	0	0	0	0	0	0	0	1	0	0	0	0	0	1	0	0	0	0	0	0	0	0	0	0	0	0	0	1
TCGA-AP-A0LQ-01	0	0	0	0	0	0	0	0	0	0	0	0	0	0	0	0	0	0	0	0	0	0	0	0	1	0	0	0	0	0	1	0	0	0	0	0	0	0	0	0	0	0	0	0	1
TCGA-AP-A0LS-01	0	0	0	0	0	0	0	0	0	0	0	0	0	0	0	0	0	0	0	0	0	0	0	0	1	0	0	0	0	0	1	0	0	0	0	0	0	0	0	0	0	0	0	0	1
TCGA-AP-A0LT-01	0	0	0	0	0	0	0	0	0	0	0	0	0	0	0	0	0	0	0	0	0	0	0	0	1	0	0	0	0	0	1	0	0	0	0	0	0	0	0	0	0	0	0	0	1
TCGA-AP-A0LV-01	0	0	0	0	0	0	0	0	0	0	0	0	0	0	0	0	0	0	0	0	0	0	0	0	1	0	0	0	0	0	1	0	0	0	0	0	0	0	0	0	0	0	0	0	1
TCGA-AP-A1DH-01	0	0	0	0	0	0	0	0	0	0	0	0	0	0	0	0	0	0	0	0	0	0	0	0	1	0	0	0	0	0	1	0	0	0	0	0	0	0	0	0	0	0	0	0	1
TCGA-AP-A1DK-01	0	0	0	0	0	0	0	0	0	0	0	0	0	0	0	0	0	0	0	0	0	0	0	0	1	0	0	0	0	0	1	0	0	0	0	0	0	0	0	0	0	0	0	0	1
TCGA-AP-A1DM-01	0	0	0	0	0	0	0	0	0	0	0	0	0	0	0	0	0	0	0	0	0	0	0	0	1	0	0	0	0	0	1	0	0	0	0	0	0	0	0	0	0	0	0	0	1
TCGA-AP-A1DO-01	0	0	0	0	0	0	0	0	0	0	0	0	0	0	0	0	0	0	0	0	0	0	0	0	1	0	0	0	0	0	1	0	0	0	0	0	0	0	0	0	0	0	0	0	1
TCGA-AP-A1DP-01	0	0	0	0	0	0	0	0	0	0	0	0	0	0	0	0	0	0	0	0	0	0	0	0	1	0	0	0	0	0	1	0	0	0	0	0	0	0	0	0	0	0	0	0	1
TCGA-AP-A1DR-01	0	0	0	0	0	0	0	0	0	0	0	0	0	0	0	0	0	0	0	0	0	0	0	0	1	0	0	0	0	0	1	0	0	0	0	0	0	0	0	0	0	0	0	0	1
TCGA-AP-A1DV-01	0	0	0	0	0	0	0	0	0	0	0	0	0	0	0	0	0	0	0	0	0	0	0	0	1	0	0	0	0	0	1	0	0	0	0	0	0	0	0	0	0	0	0	0	1
TCGA-AP-A1E0-01	0	0	0	0	0	0	0	0	0	0	0	0	0	0	0	0	0	0	0	0	0	0	0	0	1	0	0	0	0	0	1	0	0	0	0	0	0	0	0	0	0	0	0	0	1
TCGA-AP-A1E1-01	0	0	0	0	0	0	0	0	0	0	0	0	0	0	0	0	0	0	0	0	0	0	0	0	1	0	0	0	0	0	1	0	0	0	0	0	0	0	0	0	0	0	0	0	1
TCGA-AP-A1E3-01	0	0	0	0	0	0	0	0	0	0	0	0	0	0	0	0	0	0	0	0	0	0	0	0	1	0	0	0	0	0	1	0	0	0	0	0	0	0	0	0	0	0	0	0	1
TCGA-AP-A1E4-01	0	0	0	0	0	0	0	0	0	0	0	0	0	0	0	0	0	0	0	0	0	0	0	0	1	0	0	0	0	0	1	0	0	0	0	0	0	0	0	0	0	0	0	0	1
TCGA-AQ-A04J-01	0	0	0	0	0	0	0	0	0	0	0	1	0	0	0	0	0	0	1	0	0	0	0	0	1	0	0	0	0	0	0	0	0	0	0	0	0	0	0	0	0	0	0	0	1
TCGA-AQ-A1H2-01	0	0	0	0	0	0	0	0	0	0	0	1	0	0	0	0	0	0	0	0	0	0	0	0	1	0	0	0	0	0	0	0	0	0	0	0	0	0	0	0	0	0	0	0	1
TCGA-AQ-A1H3-01	0	0	0	0	0	0	0	0	0	0	0	1	0	0	0	0	0	0	0	0	0	0	0	0	1	0	0	0	0	0	0	0	0	0	0	0	0	0	0	0	0	0	0	0	1
TCGA-AQ-A7U7-01	0	0	0	0	0	0	0	0	0	0	0	1	0	0	0	0	0	0	0	0	0	0	0	0	1	0	0	0	0	0	0	0	0	0	0	0	0	0	0	0	0	0	0	0	1
TCGA-AR-A0TP-01	0	0	0	0	0	0	0	0	0	0	0	1	0	0	0	0	0	0	1	0	0	0	0	0	1	0	0	0	0	0	0	0	0	0	0	0	0	0	0	0	0	0	0	0	1
TCGA-AR-A0TS-01	0	0	0	0	0	0	0	0	0	0	0	1	0	0	0	0	0	0	1	0	0	0	0	0	1	0	0	0	0	0	0	0	0	0	0	0	0	0	0	0	0	0	0	0	1
TCGA-AR-A0TT-01	0	0	0	0	0	0	0	0	0	0	0	1	0	0	0	0	0	1	0	0	0	0	0	0	1	0	0	0	0	0	0	0	0	0	0	0	0	0	0	0	0	0	0	0	1
TCGA-AR-A0TX-01	0	0	0	0	0	0	0	0	0	0	0	1	0	0	0	0	0	0	0	0	0	0	0	0	1	0	0	0	0	0	0	0	0	0	0	0	0	0	0	0	0	0	0	0	1
TCGA-AR-A0TY-01	0	0	0	0	0	0	0	0	0	0	0	1	0	0	0	0	0	1	0	0	0	0	0	0	1	0	0	0	0	0	0	0	0	0	0	0	0	0	0	0	0	0	0	0	1
TCGA-AR-A0TZ-01	0	0	0	0	0	0	0	0	0	0	0	1	0	0	0	0	0	1	0	0	0	0	0	0	1	0	0	0	0	0	0	0	0	0	0	0	0	0	0	0	0	0	0	0	1
TCGA-AR-A0U1-01	0	0	0	0	0	0	0	0	0	0	0	1	0	0	0	0	0	0	1	0	0	0	0	0	1	0	0	0	0	0	0	0	0	0	0	0	0	0	0	0	0	0	0	0	1
TCGA-AR-A0U3-01	0	0	0	0	0	0	0	0	0	0	0	1	0	0	0	0	0	1	0	0	0	0	0	0	1	0	0	0	0	0	0	0	0	0	0	0	0	0	0	0	0	0	0	0	1
TCGA-AR-A0U4-01	0	0	0	0	0	0	0	0	0	0	0	1	0	0	0	0	0	0	1	0	0	0	0	0	1	0	0	0	0	0	0	0	0	0	0	0	0	0	0	0	0	0	0	0	1
TCGA-AR-A1AH-01	0	0	0	0	0	0	0	0	0	0	0	1	0	0	0	0	0	0	1	0	0	0	0	0	1	0	0	0	0	0	0	0	0	0	0	0	0	0	0	0	0	0	0	0	1
TCGA-AR-A1AK-01	0	0	0	0	0	0	0	0	0	0	0	1	0	0	0	0	0	1	0	0	0	0	0	0	1	0	0	0	0	0	0	0	0	0	0	0	0	0	0	0	0	0	0	0	1
TCGA-AR-A1AL-01	0	0	0	0	0	0	0	0	0	0	0	1	0	0	0	0	0	1	0	0	0	0	0	0	1	0	0	0	0	0	0	0	0	0	0	0	0	0	0	0	0	0	0	0	1
TCGA-AR-A1AM-01	0	0	0	0	0	0	0	0	0	0	0	1	0	0	0	0	0	0	0	0	0	0	0	0	1	0	0	0	0	0	0	0	0	0	0	0	0	0	0	0	0	0	0	0	1
TCGA-AR-A1AN-01	0	0	0	0	0	0	0	0	0	0	0	1	0	0	0	0	0	1	0	0	0	0	0	0	1	0	0	0	0	0	0	0	0	0	0	0	0	0	0	0	0	0	0	0	1
TCGA-AR-A1AO-01	0	0	0	0	0	0	0	0	0	0	0	1	0	0	0	0	0	0	0	0	0	0	0	0	1	0	0	0	0	0	0	0	0	0	0	0	0	0	0	0	0	0	0	0	1
TCGA-AR-A1AP-01	0	0	0	0	0	0	0	0	0	0	0	1	0	0	0	0	0	1	0	0	0	0	0	0	1	0	0	0	0	0	0	0	0	0	0	0	0	0	0	0	0	0	0	0	1
TCGA-AR-A1AQ-01	0	0	0	0	0	0	0	0	0	0	0	1	0	0	0	0	0	0	1	0	0	0	0	0	1	0	0	0	0	0	0	0	0	0	0	0	0	0	0	0	0	0	0	0	1
TCGA-AR-A1AR-01	0	0	0	0	0	0	0	0	0	0	0	1	0	0	0	0	0	0	1	0	0	0	0	0	1	0	0	0	0	0	0	0	0	0	0	0	0	0	0	0	0	0	0	0	1
TCGA-AR-A1AS-01	0	0	0	0	0	0	0	0	0	0	0	1	0	0	0	0	0	1	0	0	0	0	0	0	1	0	0	0	0	0	0	0	0	0	0	0	0	0	0	0	0	0	0	0	1
TCGA-AR-A1AU-01	0	0	0	0	0	0	0	0	0	0	0	1	0	0	0	0	0	1	0	0	0	0	0	0	1	0	0	0	0	0	0	0	0	0	0	0	0	0	0	0	0	0	0	0	1
TCGA-AR-A1AW-01	0	0	0	0	0	0	0	0	0	0	0	1	0	0	0	0	0	1	0	0	0	0	0	0	1	0	0	0	0	0	0	0	0	0	0	0	0	0	0	0	0	0	0	0	1
TCGA-AR-A1AX-01	0	0	0	0	0	0	0	0	0	0	0	1	0	0	0	0	0	1	0	0	0	0	0	0	1	0	0	0	0	0	0	0	0	0	0	0	0	0	0	0	0	0	0	0	1
TCGA-AR-A1AY-01	0	0	0	0	0	0	0	0	0	0	0	1	0	0	0	0	0	0	1	0	0	0	0	0	1	0	0	0	0	0	0	0	0	0	0	0	0	0	0	0	0	0	0	0	1
TCGA-AR-A24L-01	0	0	0	0	0	0	0	0	0	0	0	1	0	0	0	0	0	0	0	0	0	0	0	0	1	0	0	0	0	0	0	0	0	0	0	0	0	0	0	0	0	0	0	0	1
TCGA-AR-A24M-01	0	0	0	0	0	0	0	0	0	0	0	1	0	0	0	0	0	0	0	0	0	0	0	0	1	0	0	0	0	0	0	0	0	0	0	0	0	0	0	0	0	0	0	0	1
TCGA-AR-A24N-01	0	0	0	0	0	0	0	0	0	0	0	1	0	0	0	0	0	0	0	0	0	0	0	0	1	0	0	0	0	0	0	0	0	0	0	0	0	0	0	0	0	0	0	0	1
TCGA-AR-A24O-01	0	0	0	0	0	0	0	0	0	0	0	1	0	0	0	0	0	0	0	0	0	0	0	0	1	0	0	0	0	0	0	0	0	0	0	0	0	0	0	0	0	0	0	0	1
TCGA-AR-A24P-01	0	0	0	0	0	0	0	0	0	0	0	1	0	0	0	0	0	0	0	0	0	0	0	0	1	0	0	0	0	0	0	0	0	0	0	0	0	0	0	0	0	0	0	0	1
TCGA-AR-A24U-01	0	0	0	0	0	0	0	0	0	0	0	1	0	0	0	0	0	0	0	0	0	0	0	0	1	0	0	0	0	0	0	0	0	0	0	0	0	0	0	0	0	0	0	0	1
TCGA-AR-A24X-01	0	0	0	0	0	0	0	0	0	0	0	1	0	0	0	0	0	0	0	0	0	0	0	0	1	0	0	0	0	0	0	0	0	0	0	0	0	0	0	0	0	0	0	0	1
TCGA-AR-A2LE-01	0	0	0	0	0	0	0	0	0	0	0	1	0	0	0	0	0	0	0	0	0	0	0	0	1	0	0	0	0	0	0	0	0	0	0	0	0	0	0	0	0	0	0	0	1
TCGA-AR-A2LH-01	0	0	0	0	0	0	0	0	0	0	0	1	0	0	0	0	0	0	0	0	0	0	0	0	1	0	0	0	0	0	0	0	0	0	0	0	0	0	0	0	0	0	0	0	1
TCGA-AR-A2LJ-01	0	0	0	0	0	0	0	0	0	0	0	1	0	0	0	0	0	0	0	0	0	0	0	0	1	0	0	0	0	0	0	0	0	0	0	0	0	0	0	0	0	0	0	0	1
TCGA-AR-A2LM-01	0	0	0	0	0	0	0	0	0	0	0	1	0	0	0	0	0	0	0	0	0	0	0	0	1	0	0	0	0	0	0	0	0	0	0	0	0	0	0	0	0	0	0	0	1
TCGA-AR-A2LN-01	0	0	0	0	0	0	0	0	0	0	0	1	0	0	0	0	0	0	0	0	0	0	0	0	1	0	0	0	0	0	0	0	0	0	0	0	0	0	0	0	0	0	0	0	1
TCGA-AR-A2LO-01	0	0	0	0	0	0	0	0	0	0	0	1	0	0	0	0	0	0	0	0	0	0	0	0	1	0	0	0	0	0	0	0	0	0	0	0	0	0	0	0	0	0	0	0	1
TCGA-AR-A2LQ-01	0	0	0	0	0	0	0	0	0	0	0	1	0	0	0	0	0	0	0	0	0	0	0	0	1	0	0	0	0	0	0	0	0	0	0	0	0	0	0	0	0	0	0	0	1
TCGA-AR-A5QN-01	0	0	0	0	0	0	0	0	0	0	0	1	0	0	0	0	0	0	0	0	0	0	0	0	1	0	0	0	0	0	0	0	0	0	0	0	0	0	0	0	0	0	0	0	1
TCGA-AR-A5QP-01	0	0	0	0	0	0	0	0	0	0	0	1	0	0	0	0	0	0	0	0	0	0	0	0	1	0	0	0	0	0	0	0	0	0	0	0	0	0	0	0	0	0	0	0	1
TCGA-AR-A5QQ-01	0	0	0	0	0	0	0	0	0	0	0	1	0	0	0	0	0	0	0	0	0	0	0	0	1	0	0	0	0	0	0	0	0	0	0	0	0	0	0	0	0	0	0	0	1
TCGA-AS-3777-01	0	0	0	0	0	0	0	0	0	0	0	0	0	1	0	0	0	0	0	0	0	1	0	0	1	0	0	0	0	0	0	0	0	0	0	0	0	0	0	0	0	0	0	0	1
TCGA-AS-3778-01	0	0	0	0	0	0	0	0	0	0	0	0	0	1	0	0	0	0	0	0	0	1	0	0	1	0	0	0	0	0	0	0	0	0	0	0	0	0	0	0	0	0	0	0	1
TCGA-AT-A5NU-01	0	0	0	0	0	0	0	0	0	0	0	0	0	1	0	0	0	0	0	0	0	0	0	0	1	0	0	0	0	0	0	0	0	0	0	0	0	0	1	0	0	0	0	0	1
TCGA-AU-6004-01	0	0	0	0	0	0	0	0	0	0	0	0	0	0	0	0	0	0	0	0	0	0	0	0	1	0	0	0	0	0	0	0	1	0	0	0	0	0	0	0	0	0	1	0	1
TCGA-AW-A1PO-01	0	0	0	0	0	0	0	0	0	0	0	0	0	0	0	0	0	0	0	0	0	0	0	0	1	0	0	0	0	0	1	0	0	0	0	0	0	0	0	0	0	0	0	0	1
TCGA-AX-A05S-01	0	0	0	0	0	0	0	0	0	0	0	0	0	0	0	0	0	0	0	0	0	0	0	0	1	0	0	0	0	0	1	0	0	0	0	0	0	0	0	0	0	0	0	0	1
TCGA-AX-A05T-01	0	0	0	0	0	0	0	0	0	0	0	0	0	0	0	0	0	0	0	0	0	0	0	0	1	0	0	0	0	0	1	0	0	0	0	0	0	0	0	0	0	0	0	0	1
TCGA-AX-A05U-01	0	0	0	0	0	0	0	0	0	0	0	0	0	0	0	0	0	0	0	0	0	0	0	0	1	0	0	0	0	0	1	0	0	0	0	0	0	0	0	0	0	0	0	0	1
TCGA-AX-A05W-01	0	0	0	0	0	0	0	0	0	0	0	0	0	0	0	0	0	0	0	0	0	0	0	0	1	0	0	0	0	0	1	0	0	0	0	0	0	0	0	0	0	0	0	0	1
[truncated: 8,875 more rows]

## Sheet: Table S2c
Table S2c
List of tumors, their TCGA type, and locations of tSCNA (e.g. 1p_amp_tel) or cSCNA (e.g. 1p_del_tel) breakpoints.
Tumor	TCGA type	1p_amp_cent	1p_amp_tel	1p_del_cent	1p_del_tel	1q_amp_cent	1q_amp_tel	1q_del_cent	1q_del_tel	2p_amp_cent	2p_amp_tel	2p_del_cent	2p_del_tel	2q_amp_cent	2q_amp_tel	2q_del_cent	2q_del_tel	3p_amp_cent	3p_amp_tel	3p_del_cent	3p_del_tel	3q_amp_cent	3q_amp_tel	3q_del_cent	3q_del_tel	4p_amp_cent	4p_amp_tel	4p_del_cent	4p_del_tel	4q_amp_cent	4q_amp_tel	4q_del_cent	4q_del_tel	5p_amp_cent	5p_amp_tel	5p_del_cent	5p_del_tel	5q_amp_cent	5q_amp_tel	5q_del_cent	5q_del_tel	6p_amp_cent	6p_amp_tel	6p_del_cent	6p_del_tel	6q_amp_cent	6q_amp_tel	6q_del_cent	6q_del_tel
TCGA-02-0001-01	GBM	0	0	0	0	0	0	0	0	1	1	0	0	1	1	0	0	1	1	0	0	1	1	0	0	0	0	0	0	0	0	0	0	0	0.0936979	0	0	0	0	0	0	0	0	0	0	0	0	0	0
TCGA-02-0003-01	GBM	0	0	0	0	0	0	0	0	0	0	0	0	0	0	0	0	0	0	0	0	0	0	0	0	0	0	0	0	0	0	0	0	0	0	0	0	0	0	0	0	0	0	0	0	0	0	0	0.499015
TCGA-02-0006-01	GBM	0	0	0	0	0	0	0	0	0	0	0	0	0	0	0	0	0	0	0	0	0	0	0	0	0	0	0	0	0	0	0	0	0	0	0	0	0	0	0	0	0	0	0	0	0	0	0	0
TCGA-02-0007-01	GBM	0	0	0	0	0	0	0	0	0	0	0	0	0	0	0	0	0	0	0	0	0	0	0	0	0	0	0	0	0	0	0	0	0	0	0	0	0	0	0	0	0	0	0	0	0	0	0	0.918548
TCGA-02-0009-01	GBM	0	0	0	0	0	0	0	0	0	0	0	0	0	0	0	0	0	0	0	0	0	0	0	0	0	0	0	0	0	0	0	0	0	0	0	0	0	0	0	0	0	0	0	0	0	0	0	0
TCGA-02-0010-01	GBM	0	0	0	0	0	0	0	0	0	0	0	0.134664	0	0	0	0	0	0	0	0	0	0	0	0.316456	0	0	0	0	0	0	0	0	0	0	0	0	0	0	0	0	0	0	0	0	0	0	0	0
TCGA-02-0011-01	GBM	0	0	0	0	0	0	0	0	0	0	0	0	0	0	0	0	0	0	0	0	0	0	0	0	1	1	0	0	0	0	0	0	0	0	0	0	0	0	1	1	1	1	0	0	0.657463	0	0	0
TCGA-02-0014-01	GBM	0	0	0	0	0.70834	0	0	0	0	0.232944	0	0	0	0	0	0	0	0	0	0	0	0	0	0	0	0	1	1	0.0431948	0.000919135	0	0	0	0	0	0.59185	0	0	0	0	0	0	0	0	0	0	0	0
TCGA-02-0015-01	GBM	0	0	0	0	0	0	0	0	0	0	0	0	0	0	0	0	0	0	0	0	0	0	0	0	0	0	0	0	0	0	0	0	0	0	0	0	0	0	0	0	0	0	0	0	0	0	0	0
TCGA-02-0016-01	GBM	0	0	0	0	0	0	0	0	0	0	0	0	0	0	0	0.00508459	0	0	0	0	0	0	0	0	0	0	0	0	0	0	0	0.00742703	0	0	0	0	0	0	0	0	0	0	0	0	0	0	0	0
TCGA-02-0021-01	GBM	0	0	0	0	0	0	0	0	0	0	0	0	0	0	0	0	0	0	0	0	0	0	0	0	0	0	0	0	0	0	0	0	0	0	0	0	0	0	0	0	0	0	0	0	0	0	0	0
TCGA-02-0023-01	GBM	0	0	0	0.0967454	0	0	0	0	0	0	0	0	0	0	0	0	0	0	0	0	0	0	0	0	0	0	0	0	0	0	0	0	0	0	0	0	0	0	0	0	0	0	1	1	0	0	1	1
TCGA-02-0024-01	GBM	0	0	0.0860826	0.235919	0	0.999981	0	0	0	0	0	0	0	0	0	0	0	0	0	0	0	0	0	0	0	0	0	0	0	0	0	0.969824	0	0.732461	0	0	0	0	0	0	0	0	0	0	0	0	0	0
TCGA-02-0025-01	GBM	0	0	0	0.0763984	0	0	0	0	0	0	0	0	0	0	0	0.433121	0	0	0	0	0	0	0	0	0	0	0	0.34623	0	0	0	0	1	1	0	0	0.083668	0	0	0.246661	0	0	0	0	0	0	0	0
TCGA-02-0026-01	GBM	0	0	0	0.0251074	0	0	0	0.106613	0	0	0	0	0	0	0	0	0	0	0	0	0	0	0	0	0	0	0	0	0	0	0	0.825361	0	0	0	0	0	0	0	0.273397	0	0	0	0.720297	0	0	0	0
TCGA-02-0027-01	GBM	0	0	0	0	0	0	0	0	0	0	0	0	0	0	0	0	0	0	0	0	0	0	0	0	0	0	0	0	0	0	0	0	0	0	0	0	0	0	0	0	0	0	0	0	0	0	0	0.361312
TCGA-02-0028-01	GBM	0	0	1	1	0	0.618249	0	0	0	0	0	0	0	0	0	0	1	1	0	0	0.743745	0	0	0	0	0	0	0	0	0	0	0	1	1	0	0	0.299809	0.320179	0	0	0	0	0	0	0	0	0	0
TCGA-02-0033-01	GBM	0	0	0	0	0	0	0	0	0	0	0	0	0	0	0	0	0	0	0	0	0	0	0	0	0	0	0	0	0	0	0	0	0	0	0	0	0	0	0	0	0	0	0	0	0	0	0	0
TCGA-02-0034-01	GBM	0	0	0	0	0	0	0	0	0	0	0	0	0	0	0	0	0	0	0	0	0	0	0	0	0	0	0	0	0	0	0	0	0	0	0	0	0	0	0	0	0	0	0	0	0	0	0	0
TCGA-02-0037-01	GBM	0	0	0	0	0	0	0	0	0	0	0	0	0	0	0	0	0	0	0	0	0	0	0	0	0	0	0	0	0	0	0	0	0	0	0	0	0	0	0	0	0	0	0	0	0	0	0	0
TCGA-02-0038-01	GBM	0	0	0	0	0	0	0	0	0	0	0	0	0	0	0	0	0	0	0	0	0	0	0	0	0	0	0	0	0	0	0	0	0	0	0	0	0	0	0	0	0	0	0	0	0	0	0	0
TCGA-02-0039-01	GBM	0	0	0	0	0	0	0	0	0	0	0	0	0	0	0	0	0	0	0	0	0	0	0	0	0	0	0	0	0	0	0	0	0	0	0	0	0	0	0	0	0	0	1	1	0	0	1	1
TCGA-02-0043-01	GBM	0	0	0	0	0	0	0	0	0	0	0	0	0	0	0	0	0	0	0	0	0	0	0	0	0	0	0	0	0	0	0	0	0	0	0	0	0	0	0	0	0	0	0	0	0	0	0	0
TCGA-02-0046-01	GBM	0	0	0	0	0	0	0	0	0	0	0	0	0	0	0	0	0	0	0	0	0	0	0	0	0	0	0	0	0	0	0	0	0	0	0	0	0	0	0	0	0	0	0	0	0	0	0	0
TCGA-02-0047-01	GBM	0	0	0	0	0	0	0	0	0	0	0	0	0	0	0	0	0	0	0	0	0	0	0	0	0	0	0	0	0	0	0	0.00271426	0	0	0	0	0	0	0	0	0	0	0	0	0	0	0	0
TCGA-02-0048-01	GBM	0	0	0	0	0	0	0	0	0	0	0	0	0	0	0	0	0	0	0	0	0	0	0	0	0	0	0	0	0	0	0	0	0	0	0	0	0	0	0	0	0	0	1	1	0	0	1	1
TCGA-02-0051-01	GBM	0	0	0	0.0714359	0	0	0	0	0	0	0	0.46838	0	0	0	0.0270072	0	0	0	0	0	0	0	0	0	0	0	0.147256	0	0	0	0	1	1	0	0	1	1	0	0	0	0	0	0.934143	0	0	0	0.730724
TCGA-02-0052-01	GBM	0	0	0	0	0	0	0	0	0	0	0	0	0	0	0	0	0	0	0	0	0	0	0	0	0	0	0	0	0	0	0	0	0	0	0	0	0	0	0	0	0	0	0	0	0	0	0	0
TCGA-02-0054-01	GBM	0	0	0	0	0	0	0	0	0	0	0	0	0	0	0	0	0	0	0	0	0	0	0	0	0	0	1	1	0	0	1	1	0	0	0	0	0	0	0	0	0	0	0	0	0	0	0	0
TCGA-02-0055-01	GBM	0	0.888112	0	0	0	0	0	0	0	0	0	0	0	0	0	0	0	0	0	0	0	0	0	0	0	0	0	0	0	0	0	0	0	0	0	0	0	0	0	0	0	0	0	0	0	0	0	0
TCGA-02-0057-01	GBM	0	0	0	0	0	0	0	0	0	0	0	0	0	0	0	0	0	0	0	0	0	0	0	0	0	0	0	0	0	0	0	0	0	0	0	0	0	0	0	0	0	0	0	0	0	0	0	0
TCGA-02-0058-01	GBM	0	0	0	0	0	0	0	0	0	0	0	0	0	0	0	0	0	0	0	0	0	0	0	0	0	0	0	0	0	0	0	0	0	0	0	0	0	0	0	0	0	0	0	0	0	0	0	0.590008
TCGA-02-0059-01	GBM	0	0	0	0	0	0	0	0	0	0	0	0	0	0	0	0.204186	0	0	0	0	0	0	0	0	0	0	0	0	0	0	0	0	0	0.0103288	0	0	0	0	0	0	0	0	0	0	0	0	0	0
TCGA-02-0060-01	GBM	0	0	0	0	0	0	0	0	0	0	0	0	0	0	0	0	0	0	0.376851	0	0	0	0.728509	0	0	0	0	0	0	0.549649	0.120181	0	0	0	0	0	0	0	0	0	0	0	0	0	0	0	0	0
TCGA-02-0064-01	GBM	0	0	0	0.0488092	0	0	0	0	0	0	0	0	0	0	0	0	0	0	0	0	0	0	0	0	0	0	0	0	0	0	0	0	0	0	0	0	0	0	0	0	0	0	0	0	0	0	0	0
TCGA-02-0068-01	GBM	0	0	0	0	0	0	0	0	0	0	0	0	0	0	0	0	0	0	0	0	0	0	0	0	0	0	0	0	0	0	0	0	0	0	0	0	0	0	0	0	0	0	0	0	0	0	0	0
TCGA-02-0069-01	GBM	0.103162	0	0	0.205681	0.171012	0	0	0	0	0	0	0	0	0	0	0	0	0.999996	0	0	0	0	0	0	0.0113699	0	0	0.672588	1	1	0	0	0	0	1	1	0	0.0859555	0.899025	0	1	1	0	0	1	1	0	0
TCGA-02-0070-01	GBM	0	0	0	0	0	0	0	0	0	0	0	0	0	0	0	0	0	0	0	0	0	0	0	0	0	0	0	0	0	0	0	0	0	0.0020655	0	0	0	0	0	0	0	0	0	0	0	0	0	0
TCGA-02-0071-01	GBM	0	0	0	0	0	0	0	0	0	0	0	0	0	0	0	0	0	0	0	0	0	0	0	0	0	0	0	0	0	0	0	0	0	0	0	0	0	0	0	0	0	0	0	0	0	0	0	0
TCGA-02-0074-01	GBM	0	0	0	0	0	0	0	0	0	0	0	0	0	0	0	0	0	0.149302	0	0	0	0	0	0	1	1	0	0	0	0.541013	0	0	0	0	0	0	0	0	0	0	0	0	0	0	0	0	0	0
TCGA-02-0075-01	GBM	0	0	0	0	0	0	0	0	0	0	0	0	0	0	0	0	0	0	0	0	0	0	0	0	1	1	0	0	1	1	0	0	0	0	0	0	0	0	0	0	0	0	0	0	0	0	0	0
TCGA-02-0079-01	GBM	0	0	0	0	0	0	0	0	0	0	0	0	0	0	0	0	0	0	0	0	0	0	0	0	0	0	1	1	0	0	1	1	0	0	0	0.00840647	0	0	0	0	0	0	0	0	0	0	0	0
TCGA-02-0080-01	GBM	0	0	0	0	0	0	0	0	0	0	0	0.000172156	0	0	0	0.0643332	0	0	0	0	0	0.0302137	0	0	0	0	0	0	0	0	0	0	0	0	0	0	0	0	0	0	0	0	0	0	0	0	0	0
TCGA-02-0083-01	GBM	0	0	0.327834	0	0	0	0	0	0	0	0	0	0	0	0	0	0	0	1	1	0	0	0	0	0	0	0	0	0	0	0	0	0	0	0	0	0	0	0	0	0	0	0	0	0	0	0	0
TCGA-02-0084-01	GBM	0	0	0	0	0	0	0	0.437733	0	0	0	0	0	0	0	0.143289	0	0	1	1	0	0	1	1	0	0	0	0	0	0	0	0	0	0	1	1	0	0	1	1	0	0	0	0	0	0	0	0
TCGA-02-0085-01	GBM	0	0	0	0	0	0	0	0	0	0	0	0	0	0	0	0	0	0	0	0	0	0	0	0	0	0	0	0	0	0	0	0	0	0	0	0	0	0	0	0	0	0	0	0	0	0	0	0
TCGA-02-0086-01	GBM	0	0	0	0	0	0	0	0	0	0	0	0	0	0	0	0	0	0	0	0	0	0	0	0	0	0.0280158	0	0	0	0	0	0	1	1	0	0	1	1	0	0	0	0	1	1	0	0	1	1
TCGA-02-0087-01	GBM	0	0	0	0	0	0	0	0	0	0	0	0	0	0	0	0	0	0	0	0	0	0	0	0	0	0	0	0	0	0	0	0	0	0	0	0	0	0	0	0	0	0	0	0	0	0	0	0
TCGA-02-0089-01	GBM	0	0	0	0	0	0	0	0	0	0	0	0	0	0	0	0	0	0	0	0	0	0	0	0	0	0	0	0	0	0	0	0	0	0	0	0	0	0	0	0	0	0	0	0	0	0	0	0
TCGA-02-0099-01	GBM	0	0	0	0	0	0.0568531	0	0	0	0	0	0	0	0	0	0	0	0	0	0	0	0	0	0	0	0	0	0	0	0	0	0	0	0	0	0	0	0	0	0.105093	0	0	0	0	0	0.0504943	0	0
TCGA-02-0102-01	GBM	0	0	0	0	0	0	0	0	0	0	0	0	0	0	0	0	0	0	0	0	0	0	0	0	0	0	0	0	0	0	0	0	0	0	0	0	0	0	0	0	0	0	0	0	0	0	0	0
TCGA-02-0104-01	GBM	0	0	0	0	0	0.840152	0	0	0	0	0	0.126882	0	0	0	0.0687996	0	0.158233	0	0	0	0	0	0	0	0	0	0	0	0	0	0	0	0	0	0	0	0	0	0.135358	0	0	0	0	0	0	0	0
TCGA-02-0106-01	GBM	0.990275	0	0	0	1	1	0	0	0	0	0	0	1	1	0	0	0	0	1	1	0	0.500744	0	0	0	0	0	0	0	0	0	0	1	1	0	0	0.52699	0	0	0	1	1	0	0	2.24e-05	0	0	0.999338
TCGA-02-0107-01	GBM	0	0	0	0	0	0	0	0	0	0	0	0	0	0	0	0	0	0	0	0	0	0	0	0	0	0	0	0	0	0	0	0	0	0	0	0	0	0	0	0	0	0	0	0	0	0	0	0
TCGA-02-0111-01	GBM	0	0	0	0	0	0	0	0	0	0	0	0	0	0	0	0	0	0	0	0	0	0	0	0	0	0	0	0	0	0	0	0	0	0	0	0	0	0	0	0	0	0	0	0	0	0	0	0
TCGA-02-0113-01	GBM	1	1	0	0	1	1	0	0	1	1	0	0	1	1	0	0	0	0	1	1	0	0	1	1	1	1	0	0	1	1	0	0	1	1	0	0	1	1	0	0	0	0	1	1	0	0	1	1
TCGA-02-0114-01	GBM	0	0	0	0.0191403	0	0	0	0	0	0	0	0.000953247	0	0	0	0	0	0	0	0	0	0	0	0	0	0	0	0	0	0	0	0	0	0	0.0109841	0	0	0	0.0182576	0	0	0	0	0	0	0	0	0.0118424
TCGA-02-0115-01	GBM	0	0	0	0.123993	0	0	0	0	0	0	0	0	0	0	0	0	0	0	0	0	0	0	0	0	0	0	0	0	0	0	0	0	0	0	0	0.793088	0	0	0	0	0	0	0	0	0	0	0	0
TCGA-02-0116-01	GBM	0	0	0	0	0	0	0	0	0	0	0	0	0	0	0	0	0	0	0	0	0	0	0	0	0	0	0	0	0	0	0	0	0	0	0	0	0	0	0	0	0	0	0	0	0	0	0	0
TCGA-02-0258-01	GBM	0	0	0	0	0	0	0	0	0	0.351832	0	0	0	0	0	0	0	0	0	0	0	0	0	0	0	0	0	0	0	0	0	0	0	0	0	0	0	0	0	0	0	0	0	0	0	0	0	0.925869
TCGA-02-0260-01	GBM	0	0	0	0	0	0	0	0	0	0	0	0	0	0	0	0	0	0	0	0	0	0	0	0	0	0	0	0	0	0	0	0	0	0	0	0	0	0	0	0	0	0	0	0	0	0	0	0
TCGA-02-0266-01	GBM	1	1	0	0	1	1	0	0	0	0	0	0	0	0	0	0.243875	0	0	0	0.906138	0	0	0	0	0	0	0	0.185247	0	0	0	0	0	0	0	0	0	0	0	0	0	0	0	0.702529	0	0	0	0.00111774
TCGA-02-0269-01	GBM	1	1	0	0	1	1	0	0	0	0	0	0	0	0	0	0	0	0	0	0	0	0	0	0	0	0	0	0	0	0	0	0	0	0	0	0	0	0	0	0	0	0	0	0	0	0	0	0
TCGA-02-0271-01	GBM	0	0	0	0	0	0	0	0	0	0	0	0	0	0	0	0	0	0	0	0	0	0	0	0	0	0	0	0	0	0	0	0	0	0	0	0	0	0	0	0	0	0	0	0	0	0	0	0
TCGA-02-0281-01	GBM	0	0	0	0	0	0	0	0	1	1	0	0	1	1	0	0	0	0.386284	0	0	0	0	0	0	0	0	0	0	0	0	0	0	0	0	0	0	0	0	0	0	0	0	0	0	0	0	0	0
TCGA-02-0285-01	GBM	0	0	0	0	0	0	0	0	0	0	0	0	0	0	0	0	0	0	0	0	0	0	0	0	0	0	0	0	0	0	0	0	0	0	0	0	0	0	0	0	0	0	0	0	0	0	0	0
TCGA-02-0289-01	GBM	0	0	0	0	0	0	0	0	0	0	0	0	0	0	0	0	0	0	0	0	0	0	0	0	0	0	0	0	0	0	0	0	0	0	0	0	0	0.000254331	0	0	0	0	0	0.242876	0	0	0	0
TCGA-02-0290-01	GBM	0	0	0	0	0	0	0	0	0	0	0	0	0	0	0	0	0	0	0	0	0	0	0	0	0	0	0	0	0	0	0	0	0	0	0	0	0	0	0	0	0	0	0	0	0	0	0	0
TCGA-02-0317-01	GBM	0	0	0	0	0	0	0	0	0	0	0	0	0	0	0	0	0	0	0	0	0	0	0	0	0	0	0	0	0	0	0	0	0	0	0	0	0	0	0	0	0	0	0	0	0	0	0	0.9548
TCGA-02-0321-01	GBM	0	0.0335213	0	0	0	0	0	0	0	0	0	0	0	0	0	0	0	0	0	0	0	0	0	0	0	0	0	0	0	0	0	0	0	0	0	0	0	0	0	0	0	0	0	0	0	0	0	0
TCGA-02-0324-01	GBM	0	0	0	0	0	0	0	0	0	0	0	0	0	0	0	0	1	1	0	0	1	1	0	0	0	0	0	0	0	0	0	0	1	1	0	0	1	1	0	0	0.203592	0	0	0	0.0201386	0	0	0.97982
TCGA-02-0325-01	GBM	0	0	0	0	0	0	0	0	0	0	0	0	0	0	0	0	1	1	0	0	1	1	0	0	0	0	0	0	0	0	0	0	0	0	0	0	0	0	0	0	0	0	1	1	0	0	1	1
TCGA-02-0326-01	GBM	0	0	0	0	0	0	0	0	0	0	0	0	0	0	0	0	0	0	0	0	0	0	0	0	0	0	0	0	0	0	0	0	0	0	0	0	0	0	0	0	0	0	0	0	0	0	0	0
TCGA-02-0330-01	GBM	1	1	0	0	1	1	0	0	0	0	0	0	0	0	0	0	0	0	1	1	0	0	1	1	1	1	0	0	1	1	0	0	0	0.428674	0	0	0	0.257824	0	0	0	0	0	0	0	0	0	0.977686
TCGA-02-0332-01	GBM	1	1	0	0	0.474257	0	0	0	0	0	0	0	0	0	0	0	0	0	0	0	0	0	0	0.067041	0	0	0	0	0	0	0	0	0	0	0	0	0	0	0	0	0	0	0	0	0	0	0	0
TCGA-02-0333-01	GBM	0	0	0	0	0	0	0	0	0	0	0	0	0	0	0	0	0	0	0	0	0	0	0	0	0	0	0	0	0	0	0	0	0	0	0	0	0	0	0	0	0	0	0	0	0	0	0	0
TCGA-02-0337-01	GBM	0	0	0	0	0	0	0	0	0	0	0	0	0	0	0	0	0	0	0	0	0	0	0	0	0	0	0	0	0	0	0	0	0	0	0	0	0	0	0	0	0	0	0	0	0	0	0	0
TCGA-02-0338-01	GBM	0	0	0	0	0	0	0	0	0	0	0	0	0	0	0	0.709385	0	0	0	0	0	0	0	0	0	0	0	0	0	0	0	0	0	0	0	0	0	0	0	0	0	0	0	0	0	0	0	0
TCGA-02-0339-01	GBM	0	0	0	0	0	0	0	0	0	0	0	0	0	0	0	0	0	0	0	0	0	0	0	0	0	0	0	0	0	0	0	0	0	0	1	1	0	0	0	0	0	0	0	0	0	0	0	0
TCGA-02-0422-01	GBM	0	0	0	0	0	0	0	0	0	0	0	0	0	0	0	0	0	0	0	0	0	0	0	0	0	0	0	0	0	0	0	0	0	0	0	0	0	0	0	0	0	0	0	0	0	0	0	0.954798
TCGA-02-0430-01	GBM	0	0	0	0	0	0	0	0	0	0	0	0	0	0	0	0	0	0	0	0	0	0.00545108	0	0	0	0	0	0	0	0	0	0	0	0	0	0	0	0	0	0	0	0	0	0	0	0	0	0.988062
TCGA-02-0432-01	GBM	0	0	0	0	0	0	0	0	0	0	0	0.0241702	0	0	0	0	0	0	0	0.999651	0	0	0	0	0	0	0	0	0	0	0	0	0	0	0	0	0	0	0	0	0	0	0	0	0	0	0	0.925869
TCGA-02-0440-01	GBM	0	0	0	0	0	0	0	0	0	0	0	0	0	0	0	0	0	0	0	0	0	0	0	0	0	0	0	0	0	0	0	0	0	0	0	0	0	0	0	0	0	0	0	0	0	0	0	0
TCGA-02-0446-01	GBM	0	0.00250541	0	0	0	0	0	0	0	0	0	0	0	0	0	0	0	0	0	0	0	0	0	0	0	0	0	0	0	0	0	0	0	0	0	0	0	0	0	0	0	0	0	0	0	0	0	0
TCGA-02-0451-01	GBM	1	1	0	0	1	1	0	0	0	0	0	0	0	0	0	0	0	0	0	0	0	0	0	0	0	0	0	0	0	0	0	0	0	0	0	0	0	0	0	0	0	0	0	0	0	0	0	0
TCGA-02-0456-01	GBM	1	1	0	0	1	1	0	0	0	0	0	0	0	0	0	0	0	0	0	0	0	0	0	0	0	0	0	0	0	0	0	0	0	0	0	0	0	0	0	0	0	0	0	0	0	0	0	0
TCGA-02-2466-01	GBM	0	0.0738653	0	0	0	0	0	0	0	0	0	0	0	0	0	0	0	0	0	0	0	0	0	0	0	0	0	0	0	0	0	0	0	0	0	0	0	0	0	0	0	0	0	0	0	0	0	0
TCGA-02-2470-01	GBM	0	0	0	0	0	0	0	0	0	0	0	0	0	0	0	0	0	0	0	0	0	0	0	0	0	0	0	0	0	0	0	0	0	0	0	0	0	0	0	0	0	0	0	0	0	0	0	0
TCGA-02-2483-01	GBM	0	0	0	0.066167	0	0.95949	0	0	0	0	0	0	0	0	0	0	0	0	0	0	0	0	0	0	0	0	0	0	0	0	0	0.451247	0	0	1	1	0	0	1	1	0	0	0	0	0	0	0	0
TCGA-02-2485-01	GBM	0	0	0	0	0	0	0	0.0205042	0	0	0	0	0	0	0	0	0	0	0	0	0	0	0	0	0	0	1	1	0	0	1	1	0	0	0	0	0	0	0	0	0	0	0	0	0	0	0	0
TCGA-02-2486-01	GBM	0	0	0	0	0	0	0	0	0	0	0	0	0	0	0	0	0	0	0	0.768107	0	0	0	0	0	0	0	0	0	0	0	0	0	0	0	0	0	0	0	0	0	0	0	0	0	0	0	0
TCGA-04-1331-01	OV	0.0234779	0	0	0.250896	1	1	0	0	0	0	0	0	0	0	0	0	0	0	0	0.189832	0	0.78441	0	0	0	0	0	0.0143676	0	0	0	0.958467	0	0.537371	0	0	0	0	0	0	0	0.41279	0	0	0	0	0	0.655946
TCGA-04-1332-01	OV	0.0328253	0	0	0	0.478063	0	0	0	0	0	0	0	0	0	0	0	1	1	0	0	1	1	0	0	0	0	0.474293	0	0	0	1	1	0	0	0	0	0	0	0	0	0	0	0	0	0	0	0	0.668924
TCGA-04-1335-01	OV	0.762253	0	0	0.237732	1	1	0	0	0	0.00219712	0	0	0	0	0	0	0.654858	0	0	0	1	1	0	0	0.378397	0	0	0	0.700029	0	0	0.299959	0.632461	0	0	0	0	0	0.437858	0	0	0.67135	0	0	0	0	0	0.520959
TCGA-04-1336-01	OV	1	1	0	0	0.834968	0	0	0	0	0.824255	0	0	0	0	0	0.450791	0	0	0	0.651301	0	0.953733	0	0	1	1	0	0	0.0139085	0	0	0.771206	0	0.720054	0	0	0	0	0	0.233674	0	0.964618	0	0	0	0.333175	0	0
TCGA-04-1337-01	OV	0	0	0	0	0	0	0	0	0	0	0	0	0	0	0	0	1	1	0	0	1	1	0	0	0	0	0	0	0	0	0	0	1	1	0	0	1	1	0	0	0	0	0	0	0	0	0	0.788809
TCGA-04-1338-01	OV	0	0	0	0.786165	0	0	0	0	0	0.198842	0	0	0	0	0	0.0272517	0	0.0961143	0.828955	0	1	1	0	0	0.0966827	0	0	0.69395	0.752478	0	0	0.191586	0	0	0	0	0	0.0406331	0	0	0.409859	0.0576109	0	0	0.247806	0	0	0.319094
TCGA-04-1341-01	OV	0.00896527	0	0	0.991006	1	1	0	0	0	0.499857	0	0	0	0.145109	0	0	0.00103519	0	0	0	1	1	0	0	0	0	1	1	0	0	1	1	1	1	0	0	0	0	1	1	0	0.151232	0	0	0	0	0	0
TCGA-04-1342-01	OV	0.727591	0	0	0	1	1	0	0	0	0.767226	0.232743	0	0.658376	0	0	0	0	0	0	0	0	0.741239	0	0	0	0	0	0	0	0	0	0	1	1	0	0	0	0	0.227953	0	0	0	0	0	0	0	0	0
TCGA-04-1343-01	OV	1	1	0	0	0.0689199	0	0	0	0	0	0	0	0	0	0	0	0.315297	0.0994462	0	0	1	1	0	0	0	0	0.921873	0	0	0	1	1	0	0	0	0	0	0.859049	0	0	0	0	0	0	0	0	0	0.0243022
TCGA-04-1346-01	OV	0.748645	0	0	0.251308	1	1	0	0	0	0	0	0	0	0	0	0	0.000762449	0	0	0.920093	1	1	0	0	0	0	0	0	0	0	0	0.642972	1	1	0	0	0.0320595	0	0	0	1	1	0	0	1	1	0	0
TCGA-04-1347-01	OV	0.813787	0	0	0	1	1	0	0	1	1	0	0	0.0549902	0.170373	0	0	0.00635757	0	0	0.993066	1	1	0	0	0	0	0	0	0	0	0	0.646719	0	0	0	0	0	0	0	0	1	1	0	0	0.493752	0	0	0.506222
TCGA-04-1348-01	OV	0	0	0	0	0	0	0	0	0	0	0	0	0	0.0971256	0	0	0	0	0	0	0	0.615448	0	0	0	0	0	0.629558	0	0	0	0.808874	0	0	0	0	0	0	0	0	0	0.440224	0	0	0	0	0	0.980707
TCGA-04-1349-01	OV	0	0	0	0	0	0	0	0	1	1	0	0	0.0390077	0	0	0.960958	1	1	0	0	1	1	0	0	1	1	0	0	1	1	0	0	1	1	0	0	1	1	0	0	1	1	0	0	0.0290069	0	0	0.970958
TCGA-04-1350-01	OV	0	0	0	0	0	0	0	0	1	1	0	0	1	1	0	0	0.00162321	0	0	0	1	1	0	0	0	0	1	1	0	0	1	1	1	1	0	0	0.074149	0	0	0.925807	0	0	0.359528	0	0	0	1	1
TCGA-04-1351-01	OV	0.0376252	0	0	0.98859	0.20404	0	0	0	0	0	0	0	0	0	0	0	0	0	0	0.626204	0	0	0	0.187577	0	0.422119	0	0	0.253519	0	0	0	0	0	1	1	0	0	1	1	0	0.845886	0.154038	0	0	0	1	1
TCGA-04-1353-01	OV	0	0	0	0.241994	0	0.160926	0	0	0	0.257143	0	0	0	0	0	0	0	0	0	0.704807	0	0.351643	0	0	0	0	0	0.751093	0	0.596323	0	0	0	0	0	0	0	0.38195	0	0	0	0.987948	0	0	0	0	0	0.272648
TCGA-04-1356-01	OV	0	0.138123	0	0	0	0	0	0	0.735107	0	0	0.225393	1	1	0	0	0	0	1	1	0	0.841571	0.243667	0	0	0.515626	0	0	0.70187	0	0	0.298129	1	1	0	0	0.104703	0	0	0.89521	0	0	0	0	0	0	0	0
TCGA-04-1357-01	OV	0.0123128	0	0	0.626593	0.999987	0	0	0	0	0	0	0.129347	0	0	0	0	0	0	0	0	0	0	0	0.101005	0	0	0	0.854694	0	0	0	0.736126	0	0.873814	0	0	0	0.592027	0	0	0	0.817497	0	0	0	0	0	0.297744
TCGA-04-1360-01	OV	0.405102	0	0	0.598613	0.412747	0	0	0	0	0	0	0.301889	0	0	0	0	0.129834	0	0	0	0.756535	0	0	0.243449	0	0.462309	0	0	0	0	0	0.989847	1	1	0	0	0.265998	0.28239	0	0	0	0.727641	0	0	0	0	0	0.999241
TCGA-04-1361-01	OV	0	0.97111	0	0	0	0	0	0	0	0.117341	0	0	0	0	0	0.00149004	0	0	0	0	0	0	0	0.0142021	0	0	0	0	0	0	0	0.989233	0	0	0	0	0	0	0	0	0	0	0	0	0	0	0	0.350558
TCGA-04-1362-01	OV	0.0230172	0.108609	0	0	0.0123413	0	0	0	0.044448	0	0	0.789318	0.0560705	0	0	0	1	1	0	0	1	1	0	0	0.173354	0	0	0.826301	0.183167	0	0	0.328542	0	0.999564	0	0	0	0	0	0.973613	0.966198	0	0	0	0.438931	0	0	0.560983
TCGA-04-1364-01	OV	0.0311447	0	0	0.968781	0.999987	0	0	0	1	1	0	0	0.0720917	0	0	0	0.197971	0	0	0	1	1	0	0	1	1	0	0	0.0425342	0	0	0	0	0	0	0	0	0	0	0.643832	0	0.887472	0	0	0	0	0	0
TCGA-04-1365-01	OV	1	1	0	0	0.156045	0	0	0	0	0	0	0	0	0	0	0	0	0	0	0.986316	0	0.720592	0	0	0	0.118138	0	0	0	0	0	0	0	0.74283	0	0	0	0.350045	0	0	0	0	0	0	0	0	0	0.1506
TCGA-04-1367-01	OV	1	1	0	0	0.999987	0	0	0	1	1	0	0	1	1	0	0	1	1	0	0	1	1	0	0	0.475613	0	0	0	0.0336239	0	0	0.966344	1	1	0	0	0.139312	0	0	0.0226149	0	0	1	1	0	0	1	1
TCGA-04-1371-01	OV	0	0	0	0	0	0	0	0	0	0.966739	0	0	0	0	0	0	0	0	0.993047	0	0	0.934558	0.0654243	0	0	0	1	1	0	0	1	1	0	0	0	0	0	0	0	0.98564	0	0	0	0	0	0	0	0.0129376
TCGA-04-1514-01	OV	0.0110911	0	0	0	1	1	0	0	0	0	0	0	0	0.292364	0	0	0	0	0.582097	0	0	0	0	0.971678	0	0	1	1	0	0	0	0.969448	0	0.450029	0	0	0	0	0	0	0	0	0	0	0	0	0	0.566022
TCGA-04-1516-01	OV	0.236161	0.157421	0	0	0.856716	0	0	0	0.0470297	0	0	0	0.97052	0	0	0.0294672	1	1	0	0	1	1	0	0	0	0	1	1	0	0	1	1	0.952394	0	0	0	0.0383121	0.0618254	0	0	0	0	0	0	0	0	0	0
TCGA-04-1517-01	OV	0.924436	0	0	0	0.0643613	0.688858	0	0	0	0	1	1	0	0.827917	0.372085	0	1	1	0	0	1	1	0	0	0	0	1	1	0	0	1	1	1	1	0	0	0	0.934289	0.304307	0	0	0	0	0	0	0	0	0
TCGA-04-1519-01	OV	0.779287	0	0	0.220703	1	1	0	0	1	1	0	0	1	1	0	0	1	1	0	0	1	1	0	0	1	1	0	0	1	1	0	0	0	0.412602	0.587212	0	0	0	1	1	0	0	1	1	0	0	1	1
TCGA-04-1525-01	OV	0.816549	0	0	0	1	1	0	0	1	1	0	0	0.0421748	0	0	0	0.212312	0	0	0	1	1	0	0	0	0	0	0	0	0.042652	0	0	0	0	0	0	0	0	0	0	1	1	0	0	0.0215234	0.110007	0	0
TCGA-04-1530-01	OV	0	0.202945	0	0	0	0.0775185	0	0	0	0	0	0.255991	0	0	0	0	0	0	0	0.188705	0	0.741474	0	0	0	0.59706	0	0	0	0.368951	0	0	0.944874	0	0	0	0.00909836	0	0	0.147555	1	1	0	0	0.866203	0	0	0
TCGA-04-1536-01	OV	0.689897	0	0	0	0.565471	0	0	0	0.000264545	0	0	0.428805	0.735289	0	0	0.26369	0	0	0	0.625451	0	0	0	0.0147027	0	0	1	1	0	0	1	1	0.320313	0	0	0.208318	0.0397183	0	0	0	1	1	0	0	0.733327	0	0	0
TCGA-04-1542-01	OV	0	0	0	0.971306	0	0.999938	0	0	0	0	0	0	0	0.99875	0	0	0	0	0	0.751582	0	0.780365	0	0	0	0	0	0.713098	0	0.0226989	0	0	1	1	0	0	0	0	0.908231	0	0	0.587975	0	0	0	0	0	0.532959
TCGA-04-1638-01	OV	0	0	0	0	1	1	0	0	1	1	0	0	1	1	0	0	1	1	0	0	1	1	0	0	0	0	1	1	0	0	0.0276167	0	1	1	0	0	0	0.93153	0	0	1	1	0	0	0.684312	0	0	0.315659
TCGA-04-1644-01	OV	0.778767	0	0	0.221177	1	1	0	0	0	0.236011	0	0	0	0	0	0	0.0370835	0	0	0.255489	1	1	0	0	0	0	1	1	0	0	1	1	0	0.343706	0	0	0	0	0	0.892884	0	0.88764	0	0	0	0.327179	0	0
TCGA-04-1646-01	OV	0.155816	0	0	0	5.5e-05	0	0	0	1	1	0	0	0.549473	0	0	0.450492	1	1	0	0	1	1	0	0	1	1	0	0	0.254902	0	0	0.745062	1	1	0	0	0	0	1	1	0	0	1	1	0	0	1	1
TCGA-04-1648-01	OV	0	0	0	0	0	0.982428	0	0	1	1	0	0	1	1	0	0	1	1	0	0	1	1	0	0	1	1	0	0	1	1	0	0	0	0	0	0	0	0	1	1	1	1	0	0	1	1	0	0
TCGA-04-1649-01	OV	0.752883	0	0	0.247105	1	1	0	0	0.050471	0	0	0	1	1	0	0	0.00161614	0	0	0	0.958378	0	0	0	0	0	1	1	0	0	1	1	1	1	0	0	0	0	1	1	0	0	0.384583	0.202305	0	0	0.431885	0
TCGA-04-1651-01	OV	0.522909	0	0	0.476994	1	1	0	0	1	1	0	0	0	0.394495	0.862199	0	1	1	0	0	0.150557	0.285479	0	0	0.0495891	0	0	0.950281	0.156713	0.503312	0	0	1	1	0	0	0.0372223	0.607052	0	0	1	1	0	0	0.187339	0	0	0.869378
TCGA-04-1652-01	OV	0	0.137478	0	0	0.151762	0	0	0	0	0	0	0	0	0.588032	0	0	0	0	0	0	0	0.381787	0	0	0	0	1	1	0	0	1	1	0	0	0	0	0	0	0	0	0	0	0	0	0	0	0	0.66155
TCGA-04-1654-01	OV	0	0	0	0	1	1	0	0	0	0	0	0	0	0	0	0	0	0	0	0	0	0	0	0	0	0	0	0.398009	0	0	0	0.868211	0	0.827408	0	0	0	0	0	0	0	0	0	0	0	0	0	0.0431997
TCGA-04-1655-01	OV	0.0474949	0	0	0	1	1	0	0	1	1	0	0	1	1	0	0	0	0.705403	0	0	1	1	0	0	0	0	1	1	0	0	1	1	0	0	0	0	0	0	0	0	0	0	0	0	0	0	0	0.57601
TCGA-05-4244-01	LUAD	0	0	0	0.0486452	0	0	0	0.0027171	1	1	0	0	0.0370819	0	0	0	0	0	0	0.441044	0	0	0	0	0	0	0	0	0	0	0	0.936524	1	1	0	0	1	1	0	0	0	0	0	0	0	0	0	0.674413
TCGA-05-4249-01	LUAD	0	0	1	1	0	0.999981	0	0	0	0	0	0	0	0	0	0	0	0	1	1	0	0	1	1	0	0	1	1	0	0	1	1	0	0	1	1	0	0	1	1	1	1	0	0	1	1	0	0
TCGA-05-4250-01	LUAD	4.05852e-05	0	0	0.999952	1	1	0	0	1	1	0	0	1	1	0	0	0	0	0	0	0	0	0	0	0	0	0	0	0	0	0	0	0	0	0	0	0	0	0	0	0	0	1	1	0	0	0.942793	0
TCGA-05-4382-01	LUAD	0	0	0	0	1	1	0	0	1	1	0	0	1	1	0	0	0.0303551	0	0	0.969631	0.999611	0	0	0.000381816	0	0	0.406291	0	0	0	1	1	0	0.063	0.610431	0	0	0	1	1	1	1	0	0	0.0895476	0	0	0.910244
TCGA-05-4384-01	LUAD	0	0	0	0	1	1	0	0	0	0	0	0	0	0	0	0	0	0	0	0	0	0	0	0	0	0	0	0	0	0	0	0	0	0	0	0	0	0	0	0	0	0	0	0	0	0	0	0
TCGA-05-4389-01	LUAD	0	0	0.294278	0.206859	0.999935	0	0	0	1	1	0	0	1	1	0	0	0	0	1	1	0	0.71019	0.289796	0	0	0	0.57037	0	0	0	0.0665411	0.141269	1	1	0	0	0	0	0	0	0.341555	0	0	0	0.0197672	0	0	0.9431
TCGA-05-4390-01	LUAD	0.0108135	0	0	0.989168	0.75512	0	0	0.244872	0	0	0	0	0	8.7e-05	0	0	0	0	0	0	0	0	0	0	0	0	0	0	0	0	0	0.321266	0	0	0	0	0	0	0	0.00238462	0	0	0	0	0	0	0	1
TCGA-05-4395-01	LUAD	0	0	0	0	1	1	0	0	1	1	0	0	1	1	0	0	0	0	0	0.322735	0	0	0	0	1	1	0	0	0	0	1	1	1	1	0	0	0	0	0	0	0	0	0	0.99648	0	0	0	0.999197
TCGA-05-4396-01	LUAD	0.252993	0	0	0.925608	1	1	0	0	0	0	0	0	0	0	0	0	0	0	0	0	0	0	0	0	0	0	0	0	0	0	0	0	1	1	0	0	0	0	0.803249	0	0	0	0	0	0	0	0	0
TCGA-05-4397-01	LUAD	0	0	0	0.0127346	0	0.968493	0	0	0	0	0	0	0	0	0	0.0165047	0	0	0	0.998629	0	0.962212	0	0	0	0	1	1	0	0	0	0	0	0	0	0	0	0	0.142939	0	0	0	0	0	0	0	0	0
TCGA-05-4398-01	LUAD	0	0	0	0	0.145253	0	0	0.0614196	0	0	0	0	0	0.689223	0	0	0	0	0	0	0	0	0	0	0	0	1	1	0	0	1	1	0	0.947564	0.0524269	0	0	0	0.412674	0	0	0	0	0	0	0	0	0
TCGA-05-4402-01	LUAD	1	1	0	0	1	1	0	0	0	0	0	0	0	0	0	0	0	0	1	1	0	0	0	0	0	0	0	0	0	0	0	0	0	0.211621	0.78834	0	0	0	1	1	0	0	0	0	0	0	0	0
TCGA-05-4403-01	LUAD	0	0	0	0	0	0	0	0	0	0	0	0	0	0	0	0	0	0	0	0	0	0	0	0	0	0	0	0	0	0	0	0	0	0	0	0	0	0	0	0	0	0	0	0	0	0	0	0
TCGA-05-4405-01	LUAD	0	0	0	0	1	1	0	0	0	0	0	0	0	0.805953	0	0	0	0	0	0	0	0	0	0	0	0	1	1	0	0	1	1	1	1	0	0	0	0	1	1	0	0	0	0	0	0	0	0.999338
TCGA-05-4410-01	LUAD	0	0	0	0	1	1	0	0	0	0	0	0.958239	0	0	0	0	0	0	0	0	0	0	0	0	0	0	0	0.787911	0	0	0	0	1	1	0	0	0	0	1	1	0	0	0	0	0	0	0	0
TCGA-05-4415-01	LUAD	0	0	0	0	1	1	0	0	0	0	0	0	0	0	0	0	0	0	0	0.725939	0	0	0	0.999972	0	0	1	1	0	0	1	1	0	0	0	0	0	0	0	0	0	0	1	1	0	0	1	1
TCGA-05-4417-01	LUAD	0	0	1	1	1	1	0	0	1	1	0	0	1	1	0	0	0	0	0	0	0	0	0	0.237983	0	0	0	0.525731	0	0	0	0.101348	0	0	0	0	0	0	0	0.999935	0	0.252045	0	0	0	0	0	0
TCGA-05-4418-01	LUAD	2.94948e-05	0	0	0	0.0667179	0	0	0	0	0	0	0	0	0	0	0	0	0	0	0	0	0	0	0	0	0	0	0	0	0	0	0	0	0	0.00896017	0	0	0	0	0	0	0	0	0	0	0	0	0
TCGA-05-4420-01	LUAD	0	0.999617	0	0	0	6.51e-05	0	0	0	0.876463	0	0	0	0	0	0	0	0	0	0	0	0.096638	0	0	0	0	1	1	0	0	0	0.655546	1	1	0	0	0.00734391	0	0	0.765707	0	0.984078	0	0	0	0	0	0.730638
TCGA-05-4422-01	LUAD	0	0.00243344	0.997496	0	0.212719	0	0	0	0	0	0	0	0	0	0	0	0	0	0	0	0	0	0	0.169099	0	0	0	0	0	0	0	0	1	1	0	0	0	0	0	0	0	0	0	0	0	0	0	0
TCGA-05-4424-01	LUAD	0.48103	0	0	0.518969	0.869892	0	0	0	1	1	0	0	0.658816	0	0	0	1	1	0	0	1	1	0	0	0	0	1	1	0	0	1	1	1	1	0	0	0	0.0296077	0.970342	0	0	0.25889	0	0	0	0	0	0
TCGA-05-4425-01	LUAD	0	0	0	0	0	0	0	0	0	0	0	0	0	0	0	0	0	0	0	0	0	0	0	0	0	0	0	0	0	0	0	0	0	0	0	0	0	0	0	0	0	0	0	0	0	0	0	0.982193
TCGA-05-4426-01	LUAD	0	0	0	0	0	0	0	0	0	0	0	0	0	0	0	0	0	0	0	0	0	0	0	0	0	0	0	0	0	0	0	0	1	1	0	0	0	0.0942461	0	0	0	0	0	0	0	0	0	0.489983
TCGA-05-4427-01	LUAD	0.625508	0	0	0	0.0749834	0	0	0	0	0	0	0	0	0	0	0	1	1	0	0	1	1	0	0	0	0	0	0	0	0	0	0.25419	0	0	0	0	0	0	0	0.999887	0	0	0	0	0	0.0644164	0	0
TCGA-05-4430-01	LUAD	0	0	0	0.999971	1	1	0	0	0	0	0	0	0	0	0	0	0	0	0	0	0	0.335363	0	0	0	0	0	0	0	0	0	0	1	1	0	0	0	0.0135767	0	0	0	0	0.22718	0	0	0	1	1
TCGA-05-4432-01	LUAD	4.05852e-05	0	0	0	0.999935	0	0	0	0.0237518	0	0	0	1	1	0	0	0.0834539	0	0	0.876907	0.00223046	0	0	0	1	1	0	0	0.290395	0	0	0.707619	0	0	0.658828	0	0	0	1	1	0	0	0	0	0	0.743322	0	0
TCGA-05-4433-01	LUAD	0.00999327	0	0	0	0	0	0	0	0	0	0	0	0	0	0	0	0	0	0	0	0	0	0	0	0	0	0	0	0	0	0	0	0	0	0	0	0	0	0	0	0	0	0	0	0	0	0	0
TCGA-05-4434-01	LUAD	0	0	0.373751	0.176791	0	0	0	0	0	0	0	0	0	0	0	0	0	0	0	0	0	0	0	0	0	0	0	0	0	0	0	0	0	0	0	0	0	0	0	0	0	0	0	0	0	0	0	0.866393
TCGA-05-5423-01	LUAD	0	0	0	0	1	1	0	0	0	0	0	0	0	0	0	0	0	0	0	0.754138	0	0	0	0	1	1	0	0	0.142345	0	0	0	1	1	0	0	1	1	0	0	0	0	0	0	0	0	0	0.41059
TCGA-05-5425-01	LUAD	0	0	0	0	0.174182	0	0	0	0	0	0	0	0	0	0	0	0	0	0.394484	0	0	0	0.0449196	0	0	0	0	0	0	0	0	0	1	1	0	0	0	0	0	0	0	0.999997	0	0	0	0	0	0.778225
TCGA-05-5428-01	LUAD	0.294496	0	0	0	1	1	0	0	1	1	0	0	1	1	0	0	0	0	0	0	0	0	0	0	0	0	0	0	0	0	0	0.411663	1	1	0	0	0.00509654	0	0	0.994901	0	0.274619	0	0	0	0	0	0.84778
TCGA-05-5429-01	LUAD	0.760937	1	0	0	1	1	0	0	0	0	0	0	0	0	0	0	0	0	0	0	1	1	0	0	0	0	0	0	0	0	0	0	0	0	0	0	0	0	0	0	0	0	0	0	0	0	0	0.951961
TCGA-05-5715-01	LUAD	0.00551825	0	0	0	1	1	0	0	0	0	0	0	0	0	0	0	0	0	1	1	0	0	1	1	1	1	0	0	1	1	0	0	0	0.905879	0	0	0	0	0	0	1	1	0	0	1	1	0	0
TCGA-06-0119-01	GBM	0	0	0	0	0	0	0	0	0	0	0	0	0	0	0	0	0	0	0	0	0	0	0	0	0	0	0	0	0	0	0	0	0	0	0	0	0	0	0	0	0	0	0	0	0	0	0	0
TCGA-06-0121-01	GBM	0	0	0	0	0	0	0	0	0	0	0	0	0	0	0	0	0	0	0	0	0	0	0	0	0	0	0	0	0	0	0	0	0	0	0	0	0	0	0	0	0	0	0	0	0	0	0	0
TCGA-06-0122-01	GBM	0	0	0	0	0	0	0	0	0	0	0	0	0	0	0	0	0	0	0	0	0	0	0	0	0	0	0	0	0	0	0	0	0	0	0	0	0	0	0	0	0	0	0	0	0	0	0	0.429819
TCGA-06-0124-01	GBM	0	0	0	0	0	0	0	0	0	0	0	0	0	0	0	0	0	0	0	0	0	0	0	0	0	0	0	0	0	0	0	0	0	0	0	0	0	0	0	0	0	0	0	0	0	0	0	0
TCGA-06-0125-01	GBM	0	0	0	0	0	0	0	0	0	0	0	0	0	0	0	0	0	0	0	0	0	0	0	0	0	0	0	0	0	0	0	0	0	0	0	0	0	0	0	0	0	0	0	0	0	0	0	0
TCGA-06-0125-02	GBM	0	0	0	0	0	0	0	0	0	0	0	0	0	0	0	0	0	0	0	0	0	0	0	0	0	0	0	0	0	0	0	0	0	0	0	0	0	0	0	0	0	0	0	0.0299261	0	0	0	0
TCGA-06-0126-01	GBM	0	0	0	0.028014	0	0	0	0	0	0	0	0	0	0	0	0	0	0	0	0	0	0	0	0	0	0	0	0	0	0	0	0	0	0	0	0	0	0	0	0	0	0	0	0	0	0	0	0
TCGA-06-0127-01	GBM	0	0	0	0	0	0	0	0	0	0	0	0	0	0	0	0	0	0	0	0	0	0	0	0	0	0	0	0	0	0	0	0	0	0	0	0	0	0	0	0	0	0	0	0	0	0	0	0
TCGA-06-0128-01	GBM	0	0	0	0	0	0	0	0	0	0	0	0	0	0.698218	0	0	0	0	0	0	0	0	0	0	0	0	0	0	0	0	0	0	0	0	0	0	0	0	0	0	0	0	0	0	0	0	0	0
TCGA-06-0129-01	GBM	0	0	0	0	0	0	0	0	0	0	0	0	0	0	0	0	0	0	0	0	0	0	0	0	0	0	0	0	0	0	0	0.431575	0	0	0	0	0	0	0	0	0	0	0	0.960446	0	0	0	0
TCGA-06-0130-01	GBM	0	0.389282	0	0	0	0	0	0	0	0	0	0	0	0	0	0	0	0	0	0.154939	0	0	0	0	1	1	0	0	1	1	0	0	0	0	0	0	0	0	0	0	0	0	1	1	0	0	1	1
TCGA-06-0132-01	GBM	0	0	0	0	0	0	0	0	0	0	0	0	0	0	0	0	0	0	0	0	0	0	0	0	0	0	0	0	0	0	0	0	0	0	0	0	0	0	0	0	0	0	0	0	0	0	0	0
TCGA-06-0133-01	GBM	1	1	0	0	1	1	0	0	1	1	0	0	1	1	0	0	0	0	0	0	0	0	0	0	0	0	0	0	0	0	0	0	0	0	0	0	0	0	0	0	0	0	0	0	0	0	0	0
TCGA-06-0137-01	GBM	0	0	0	0	0	0	0	0	0	0	0	0	0	0	0	0	0	0	0	0	0	0	0	0	0	0	0	0	0	0	0	0	0	0	0	0	0	0	0	0	0	0	0	0	0	0	0	0
TCGA-06-0138-01	GBM	0	0	0	0	0	0	0	0	0	0	0	0	0	0	0	0	0	0	0	0	0	0	0	0	0	0	0	0	0	0	0	0	0	0	0	0	0	0	0	0	0	0	0	0	0	0	0	0
TCGA-06-0139-01	GBM	0	0	0	0	0	0	0	0	0	0	0	0	0	0	0	0	0	0	0	0	0	0	0	0	0	0	0	0	0	0	0	0	0	0	0	0	0	0	0	0	0	0	0	0	0	0	0	0
TCGA-06-0140-01	GBM	0	0	0	0	0	0	0	0	0	0	0	0	0	0	0	0	0	0	0	0	0	0	0	0	0	0	0	0	0	0	0	0	0	0	0	0	0	0	0	0	0	0	0	0	0	0	0	0
TCGA-06-0141-01	GBM	0	0	0	0	0	0	0	0	0	0	0	0	0	0	0	0	0	0	0	0	0	0	0	0	0	0	0	0	0	0	0	0	0	0	0	0	0	0	0	0	0	0	1	1	0	0	1	1
TCGA-06-0142-01	GBM	0	0	0	0	0	0	0	0	0	0	0	0	0	0	0	0	0	0	0	0	0	0	0	0	0	0	0	0	0	0	0	0	0	0	0	0	0	0	0	0	0	0	0.0588094	0	0	0	1	1
TCGA-06-0143-01	GBM	0	0	0	0	0	0	0	0	0	0	0	0	0	0	0	0	0	0	0	0	0	0	0	0	0	0	0	0	0	0	0	0	0	0	0	0	0	0	0	0	0	0	0	0	0	0	0	0
TCGA-06-0145-01	GBM	0	0	0	0	0	0	0	0	0	0	0	0	0	0	0	0	0	0	0	0	0	0	0	0	0	0	0	0	0	0	0	0	0	0	0	0	0	0	0	0	0	0	0	0	0	0	0	0
TCGA-06-0146-01	GBM	0	0	0	0	0	0	0	0	0	0	0	0	0	0	0	0	0	0	0	0	0	0	0	0	0	0	0	0	0	0	0	0	0	0	0	0	0	0	0	0	0	0	0	0	0	0	0	0
TCGA-06-0147-01	GBM	0	0	0	0	0	0	0	0	0	0	0	0	0	0	0	0	0	0	0	0	0	0	0	0	0	0	0	0	0	0	0	0	0	0	0	0	0	0	0	0	0	0	0	0	0	0	0	0
TCGA-06-0148-01	GBM	0	0	0.155178	0	0	0	0	0	0	0	0	0	0	0	0	0	0	0	0	0	0	0	0	0	0	0	0	0	0	0	0	0	0	0	0	0.0708988	0	0	0	0	0	0	0	0	0	0	0	0
TCGA-06-0149-01	GBM	0	0	0	0	0	0	0	0	0	0	0	0	0	0	0	0	0	0	0	0	0	0	0	0	0	0	0	0	0	0	0	0	0	0	0	0	0	0	0	0	0	0	0	0	0	0	0	0
TCGA-06-0150-01	GBM	0	0	0	0	0	0	0	0	0	0	0	0	0	0	0	0	0	0	0	0	0	0	0	0	0	0	0	0	0	0	0	0	0	0	0	0	0	0	0	0	0	0	0	0	0	0	0	0
TCGA-06-0151-01	GBM	0	0	1	1	0	0	1	1	1	1	0	0	0.523359	0	0	0	0	0	1	1	0	0	1	1	0	0	1	1	0	0	1	1	0.923957	0	0	0	1	1	0	0	0	0	1	1	0	0	1	1
TCGA-06-0152-01	GBM	1	1	0	0	1	1	0	0	0	0	1	1	0	0	1	1	0	0	1	1	0	0	1	1	0	0	1	1	0	0	1	1	0	0	0	0	0	0	0	0	0	0	0	0	0	0	0	0
TCGA-06-0152-02	GBM	0	0	0	0	0	0	0	0	0	0	0	0	0	0	0	0	0	0	0	0	0	0	0	0	0	0	0	0	0	0	0	0	0	0	0	0	0	0	0	0	0	0	0	0	0	0	0	0
TCGA-06-0154-01	GBM	0	0	0	0	0	0	0	0	0	0	0	0	0	0	0	0	0	0	0	0	0	0	0	0	0	0	0	0	0	0	0	0	0	0	0	0	0	0	0	0	0	0	0	0	0	0	0	0
TCGA-06-0155-01	GBM	0	0	0	0	0	0	0	0	0	0	0	0	0	0	0	0	0	0	0	0	0	0	0	0	0	0	0	0	0	0	0	0	0	0	0	0	0	0	0	0	0	0	0	0	0	0	0	0
TCGA-06-0157-01	GBM	0	0	0	0	0	0	0	0	0	0	0	0	0	0	0	0	0	0	0	0	0	0	0	0	0	0	0	0	0	0	0	0	0	0	0	0	0	0	0	0	0	0	0	0	0	0	0	0
TCGA-06-0158-01	GBM	0	0	0	0	0	0	0	0	0	0	0	0	0	0	0	0	0	0	0	0	0	0	0	0	0	0	0	0	0	0	0	0	0	0	0	0	0	0	0	0	0	0	0	0	0	0	0	0
TCGA-06-0159-01	GBM	0	0	0	0	0	0	0	0	0	0	0	0	0	0	0	0	0	0	0	0	0	0	0	0	0	0	0	0	0	0	0	0	0	0	0	0	0	0	0	0	0	0	0	0	0	0	0	0
TCGA-06-0160-01	GBM	0	0	0	0	0	0	0	0	0	0	0	0	0	0	0	0	0	0	0	0	0	0	0	0	0	0	0	0	0	0	0	0	0	0	0	0	0	0	0	0	0	0	0	0	0	0	0	0
TCGA-06-0162-01	GBM	0.899829	0	0	0.100152	1	1	0	0	0	0	0	0	0	0	0	0	0	0	0	0	0	0	0	0	1	1	0	0	1	1	0	0	0	0.841842	0	0	0	0.102252	0	0	0	0	1	1	0	0	1	1
TCGA-06-0164-01	GBM	0	0	0	0.238013	0	0	0	0	0	0	0	0	0	0	0	0	0	0	0	0	0	0	0	0	0	0	0	0	0	0	0	0	0	0	0	0	0	0	0	0	0	0	0	0	0	0	0	0
TCGA-06-0165-01	GBM	0	0	0	0	0	0	0	0	0	0	0	0	0	0	0	0	0	0	0	0	0	0	0	0	0	0	0	0	0	0	0	0	0	0	0	0	0	0	0	0	0	0	0	0	0	0	0	0
TCGA-06-0166-01	GBM	0	0	0	0.104447	0	0.946113	0	0	0	0	0	0	0	0	0	0	1	1	0	0	1	1	0	0	0	0	1	1	0.0525504	0	0	0.947442	0	0	0	0	0	0	0	0	0	0	1	1	0	0	1	1
TCGA-06-0168-01	GBM	0.703139	1	0	0	1	1	0	0	0	0	0	0	0	0	0	0	0	0	0	0	0	0	0	0	0	0	0	0	0	0	0	0	0	0	0	0	0	0	0	0	0	0	0	0	0	0	0	0
TCGA-06-0169-01	GBM	0	0	0	0	0	0	0	0	0	0	0	0	0	0	0	0	0	0	0	0	0	0	0	0	0	0	0	0	0	0	0	0	0	0	0	0	0	0	0	0	0	0	0	0	0	0	0	0
TCGA-06-0171-01	GBM	0	0	0	0.217376	0	0	0	0	0	0	0	0	0	0	0	0	0	0	0	0	0	0	0	0	0	0	0	0	0	0	0	0	0	0	0	0	0	0	0	0	0	0	0	0	0	0	0	0
TCGA-06-0171-02	GBM	0	0	0	0	0	0	0	0	0	0	0	0	0	0	0	0	0	0	0	0	0	0	0	0	0	0	0	0	0	0	0	0	0	0	0	0	0	0	0	0	0	0	0	0	0	0	0	0
TCGA-06-0173-01	GBM	0	0	0	0	0	0	0	0	0	0	0	0	0	0	0	0	0	0	0	0	0	0	0	0	0	0	0	0.910685	0	0	0	0	0	0	0	0	0	0	0	0	0	0	0	0	0	0	0	0
TCGA-06-0174-01	GBM	0	0	0	0	0	0	0	0	0	0	0	0	0	0	0	0	0	0	0	0	0	0	0	0	0	0	0	0	0.0255747	0	0	0	0	0	0	0	0	0	0	0	0	0	0	0	0	0	0	0
TCGA-06-0175-01	GBM	0	0	0	0.0582161	0	0	0	0	0	0	0	0	0	0	0	0	0	0	0	0	0	0	0	0	0	0	0	0.999999	0	0	0	0.0912826	0	0	0	0	0	0	0	0	0	0	0	0	0	0	0	0
TCGA-06-0176-01	GBM	0	0	0	0	0	0	0	0	0	0	0	0	0	0	0	0	0	0	0	0	0	0	0	0	0	0	0	0	0	0	0	0	0	0	0	0	0	0	0	0	0	0	0	0	0	0	0	0
TCGA-06-0177-01	GBM	1	1	0	0	1	1	0	0	0	0	0	0	0	0	0	0	0	0.00172819	0	0	0	0	0	0	0	0	0	0	0	0	0	0.956828	0	0	0	0	0	0	0	0	0	0	0	0	0	0	0	0
TCGA-06-0178-01	GBM	0	0	0	0	0	0	0	0	0	0	0	0	0	0	0	0	0	0	0	0	0	0	0	0	0	0	0	0	0	0	0	0	0	0	0	0	0	0	0	0	0	0	0	0	0	0	0	0
TCGA-06-0179-01	GBM	0	0	0	0	0	0	0	0	0	0	0	0	0	0	0	0	0	0	0	0	0	0	0	0	0	0	0	0	0	0	0	0	0	0	0	0	0	0	0	0	0	0	0	0	0	0	0	0
TCGA-06-0182-01	GBM	0.935737	0	0	0	1	1	0	0	0	0	0	0	0	0	0	0	0	0	0	0	0	0	0	0	0	0	0	0	0	0	0	0	0	0	0	0	0	0	0	0	0	0	0	0	0	0	0	0
TCGA-06-0184-01	GBM	0.938894	0	0	0.061104	1	1	0	0	0	0	0	0	0	0	0	0	1	1	0	0	1	1	0	0	0	0	0	0	0	0	0	0	0	0	0	0	0	0	0	0	0	0	1	1	0	0	1	1
TCGA-06-0185-01	GBM	0	0	0	0	0	0	0	0	0	0	0	0	0	0	0	0	0	0	0	0	0	0	0	0	0	0	0	0	0	0	0	0	0	0	0	0	0	0	0	0	0	0	0	0	0	0	0	0
TCGA-06-0187-01	GBM	0	0.75248	0	0	0	6.51e-05	0	0	0	0	0	0	0	0	0	0	0	0	0	0.0265248	0	0	0	0	0	0	0	0	0	0	0	0	0	0	0	0	0	0	0	0	0	0	0	0	0	0	0	0.989278
TCGA-06-0188-01	GBM	1	1	0	0	1	1	0	0	0	0	0	0	0	0	0	0	1	1	0	0	1	1	0	0	0	0	0	0	0	0	0	0	0	0	0	0	0	0	0	0	0	0	0	0	0	0	0	0
TCGA-06-0189-01	GBM	0	0	0	0	0	0	0	0	0	0	0	0	0	0	0	0	0	0	0	0	0	0	0	0	0	0	0	0	0	0	0	0	0	0	0	0	0	0	0	0	0	0	0	0	0	0	0	0
TCGA-06-0190-01	GBM	0	0	0	0	0	0	0	0	0	0	0	0	0	0	0	0	0	0	0	0	0	0	0	0	0	0	0	0	0	0	0	0	0	0	0	0	0	0	0	0	0	0	0	0	0	0	0	0
TCGA-06-0190-02	GBM	0	0	0	0	0	0	0	0	0	0	0	0	0	0	0	0	0	0	0	0	0	0	0	0	0	0	0	0	0	0	0	0	0	0	0	0	0	0	0	0	0	0	0	0	0	0	0	0
TCGA-06-0192-01	GBM	0	0	0	0	0	0	0	0	0	0	0	0	0	0	0	0	0	0	0	0	0	0	0	0	0	0	1	1	0.0235559	0	0	0	0	0	0	0	0	0	0	0	0	0	0	0	0	0	0	0
TCGA-06-0194-01	GBM	0	0	0	0	0	0	0	0	0	0	0	0	0	0	0	0	0	0	0	0	0	0	0	0	0	0	0	0	0	0	0	0	0	0	0	0	0	0	0	0	0	0	0	0	0	0	0	0
TCGA-06-0195-01	GBM	0.953961	0	0	0.0459954	1	1	0	0	0	0	0	0	0	0	0	0	0	0	0	0	0	0	0	0	1	1	0	0	1	1	0	0	1	1	0	0	1	1	0	0	0	0	0	0	0	0	0	0
TCGA-06-0197-01	GBM	0	0	0	0	0	0	0	0	0	0	0	0	0	0	0	0	0	0	0	0	0	0	0	0	0	0	0	0	0	0	0	0	0	0	0	0	0	0	0	0	0	0	0	0	0	0	0	0
TCGA-06-0201-01	GBM	0	0	0	0	0	0	0	0	0	0	0	0	0	0	0	0	0	0	0	0	0	0	0	0	0	0	0	0	0	0	0	0	0	0	0	0	0	0	0	0	0	0	0	0	0	0	0	0
TCGA-06-0206-01	GBM	1	1	0	0	1	1	0	0	0	0	0	0	0	0	0	0	0	0	0	0	0	0	0	0	0	0	0	0	0	0	0	0	0	0	0	0	0	0	0	0	0	0	0	0	0	0	0	0
TCGA-06-0208-01	GBM	0	0	0	0	0	0	0	0	0	0	0	0	0	0	0	0	0	0	0	0	0	0	0	0	0	0	0	0	0	0	0	0	0	0	0	0	0	0	0	0	0	0	0	0	0	0	0	0
TCGA-06-0210-01	GBM	0	0	0	0	0	0	0	0	0	0	0	0	0	0	0	0	0	0	0	0	0	0	0	0	0	0	0	0	0	0	0	0	0	0	0	0	0	0	0	0	0	0	0	0	0	0	0	0
TCGA-06-0210-02	GBM	0	0	0	0	0	0	0	0	0	0	0	0	0	0	0	0	0	0	0	0	0	0	0	0	0	0	0	0	0	0	0	0	0	0	0	0	0	0	0	0	0	0	0	0	0	0	0	0
TCGA-06-0211-01	GBM	0	0	0	0	0	0	0	0	0	0	0	0	0	0	0	0	1	1	0	0	1	1	0	0	0	0	0	0	0	0	0	0	0	0	0	0	0	0	0	0	0	0	0	0	0	0	0	0
TCGA-06-0211-02	GBM	0	0	0	0	0	0	0	0	0	0	0	0	0	0	0	0	0	0	0	0	0	0	0	0	0	0	0	0	0	0	0	0	0	0	0	0	0	0	0	0	0	0	0	0	0	0	0	0
TCGA-06-0213-01	GBM	0	0.665496	0	0	0	0	0	0	0	0	0	0	0	0	0	0	0	0	0	0	0	0	0	0	0	0	0	0	0	0	0	0	0	0	0	0	0	0	0	0	0	0	0	0	0	0	0	0
TCGA-06-0214-01	GBM	0	0	0	0	0	0	0	0	0	0	0	0	0	0	0	0	0	0	0	0	0	0	0	0	0	0	0	0	0	0	0	0	0	0	0	0	0	0	0	0	0	0	0	0	0	0	0	0.944212
TCGA-06-0216-01	GBM	1	1	0	0	1	1	0	0	1	1	0	0	1	1	0	0	0	0	0	0	0	0	0	0	0	0	0	0	0	0	0	0	0	0	0	0	0	0	0	0	0	0	0	0.990995	0	0	0	0.977924
TCGA-06-0219-01	GBM	0	0	0	0	0	0	0	0	0	0	0	0	0	0	0	0	0	0	0	0	0	0	0	0.0696742	0	0	0	0	0	0	0	0	0	0	0	0	0	0	0	0	0	0	0	0	0	0	0	0
TCGA-06-0221-01	GBM	0	0	0	0	0	0	0	0	0	0.265499	0	0	0	0	0	0.0732117	0	0	1	1	0	0	1	1	0	0	0	0	0	0	0	0	0	0	0	0	0	0	0	0	0	0	0	0	0	0	0	0
TCGA-06-0221-02	GBM	0	0	0	0	0	0	0	0	0	0	0	0	0	0	0	0.0732306	0	0	0	0	0	0	0	0	0	0	0	0	0	0	0	0	0	0	0	0	0	0	0	0	0	0	0	0	0	0	0	0
TCGA-06-0237-01	GBM	0	0.930304	0	0	0	0	0	0	0	0	0	0	0	0	0	0	0	0	0	0	0	0	0	0	0	0	0	0	0	0	0	0	0	0	0.00577122	0	0	0	0	0	0	0	0	0	0	0	0	0
TCGA-06-0238-01	GBM	0	0	0	0	0	0	0	0	0	0	0	0	0	0	0	0	0	0	0	0	0	0	0	0	0	0	0	0	0	0	0	0	0	0	0	0	0	0	0	0	0	0	0	0.050671	0	0	0	0
TCGA-06-0240-01	GBM	0	0	0	0	0	0	0	0	0	0	0	0	0	0	0	0	0	0	0	0	0	0	0	0	0	0	0	0	0	0	0	0	0	0	0	0	0	0	0	0	0	0	0	0	0	0	0	0
TCGA-06-0241-01	GBM	0	0	0	0	0	0	0	0	0	0	0	0	0	0	0	0	0	0	0	0	0	0	0	0	0	0	0	0	0	0	0	0	0	0	0	0	0	0	0	0	0	0	0	0	0	0	0	0
TCGA-06-0394-01	GBM	0	0	0	0	0	0	0	0	0	0	0	0	0	0	0	0	0	0	0	0	0	0	0	0	0	0	0	0	0	0	0	0	0	0	0	0	0	0	0	0	0	0	0	0	0	0	0	0
TCGA-06-0397-01	GBM	0	0	0	0	0	0	0	0	0	0	0	0	0	0	0	0	0	0	0	0	0	0	0	0	0	0	0	0	0	0	0	0	1	1	0	0	1	1	0	0	0	0	0	0	0	0	0	0
TCGA-06-0402-01	GBM	0	0	0	0.0113619	0	0	0	0	0	0	0	0	0	0	0	0	0	0	0	0	0	0	0	0	0	0	0	0	0	0	0	0	0	0	0	0	0	0	0	0	0	0	0	0	0	0	0	0
TCGA-06-0409-01	GBM	0.0277841	0	0	0	1	1	0	0	0	0	0	0	0	0	0	0	0	0	1	1	0	0	1	1	1	1	0	0	1	1	0	0	1	1	0	0	1	1	0	0	0	0	0	0	0	0	0	0
TCGA-06-0410-01	GBM	0	0.156677	0	0	0	0	0	0	0	0	0	0	0	0	0	0	1	1	0	0	1	1	0	0	0	0	0	0	0	0	0	0	1	1	0	0	1	1	0	0	1	1	0	0	1	1	0	0
TCGA-06-0412-01	GBM	0	0	0	0	0	0	0	0	0	0	0	0	0	0	0	0	0	0	0	0	0	0	0	0	0	0	0	0	0	0	0	0	0	0	0	0	0	0	0	0	0	0	0	0	0	0	0	0
TCGA-06-0413-01	GBM	0	0	0	0	0	0	0	0	0	0	0	0	0	0	0	0	1	1	0	0	1	1	0	0	0	0	0	0	0	0	0	0	0	0	0	0	0	0	0	0	0	0	0	0	0	0	0	0
TCGA-06-0414-01	GBM	1	1	0	0	1	1	0	0	0	0	0	0	0	0	0	0	1	1	0	0	1	1	0	0	0	0	0	0	0	0	0	0	0	0	0	0	0	0	0	0	1	1	0	0	1	1	0	0
TCGA-06-0644-01	GBM	0	0	0.137476	0	0	0	0	0	0	0	0	0	0	0	0	0	0	0	0	0	0	0	0	0	0	0	0	0	0	0	0	0	0	0	0	0	0	0	0	0	0	0	1	1	0	0	1	1
TCGA-06-0645-01	GBM	0	0	0	0	0	0	0	0	0	0	0	0	0	0	0	0	0	0	0	0	0	0	0	0	0	0	1	1	0	0	1	1	1	1	0	0	1	1	0	0	0	0	0	0	0	0	0	0
TCGA-06-0646-01	GBM	0	0.00304826	0	0	0	0	0	0	0	0	0	0	0	0	0	0	0	0	0	0	0	0	0	0	0	0	0	0	0	0	0	0	0	0	0	0	0	0	0	0	0	0	0	0	0	0	0	0
TCGA-06-0648-01	GBM	0	0	0	0	0	0	0	0	0	0	0	0	0	0	0	0	0	0	0	0	1	1	0	0	0	0	0	0	0	0	0	0	0	0	0	0	0	0	0	0	0	0	0	0	0	0	0	0
TCGA-06-0649-01	GBM	1	1	0	0	0.0624447	0	0	0	0	0.964512	0	0	0	0	0	0	1	1	0	0	1	1	0	0	0	0	0	0	0.0489649	0	0	0	1	1	0	0	0.131709	0	0	0	0	0	0	0.976873	0	0	0	0
TCGA-06-0650-01	GBM	0	0	0	0	0	0	0	0	0	0	0	0	0	0	0	0	0	0	0	0	0	0	0	0	0	0	0	0	0	0	0	0	0	0	0	0	0	0	0	0	0	0	0	0	0	0	0	0
TCGA-06-0686-01	GBM	0	0	0	0	0	0	0	0	0	0	0	0	0	0	0	0	1	1	0	0	1	1	0	0	0	0	0	0	0	0	0	0	0	0	0	0	0	0	0	0	0	0	0	0	0	0	0	0
TCGA-06-0743-01	GBM	0	0	0	0	0	0	0	0	0	0	0	0	0	0	0	0	0	0	0	0	0	0	0	0	0	0	0	0	0	0	0	0	0	0	0	0	0	0	0	0	0	0	0	0	0	0	0	0
TCGA-06-0744-01	GBM	0	0	0	0	0	0	0	0	0	0	0	0	0	0	0	0	0	0	0	0	0	0	0	0	0	0	0	0	0	0	0	0.0334687	0	0	0	0	0	0	0	0.45392	0	0	0	0	0	0	0	0
TCGA-06-0745-01	GBM	0	0	0	0.200759	0	0	0	0	0	0	0	0	0	0	0	0	0	0	0.546802	0	0	0	0.0866579	0	0	0	0	0	0	0	0	0	0	0	0	0	0	0	0	0	0	0	0	0	0	0	0	0
TCGA-06-0747-01	GBM	0	0	0	0.115747	0	0	0	0	0	0	0	0	0	0	0	0	0	0	0	0	0	0	0	0	0	0	0	0	0	0	0	0	0	0	0	0	0	0	0	0	0	0	0	0	0	0	0	0
TCGA-06-0749-01	GBM	0	0	0	0	0	0	0	0	0	0	0	0	0	0	0	0	0	0	0	0	0	0	0	0	0	0	0	0	0	0	0	0	0	0	0	0	0	0	0	0	0	0	0	0	0	0	0	0
TCGA-06-0750-01	GBM	0	0	0	0	0	0	0	0	0	0	0	0	0	0	0	0	0	0	0	0	0	0	0	0	0	0	0	0	0	0	0	0	0	0	0	0	0	0	0	0	0	0	0	0	0	0	0	0.999978
TCGA-06-0875-01	GBM	0	0	0	0	0	0	0	0	0	0	0	0	0	0	0	0	0	0	0	0	0	0	0	0	0	0	0	0	0	0	0	0	0	0	0	0	0	0	0	0	0	0	0	0	0	0	0	0
TCGA-06-0876-01	GBM	0	0	0	0	0	0	0	0	0	0	0	0	0	0	0	0	0	0	0	0	0	0	0	0	0	0	0	0	0	0	0	0	0	0	0	0	0	0	0	0	0	0	0	0	0	0	0	0
TCGA-06-0877-01	GBM	0	0	0	0	0	0	0	0	1	1	0	0	1	1	0	0	0	0	0	0	0	0	0	0	0	0	0	0	0	0	0	0	0	0	0	0	0	0	0	0	0	0	0	0	0	0	0	0
TCGA-06-0878-01	GBM	0	0	0	0.06302	0	0	0	0	0	0	0	0	0	0	0	0	0	0	1	1	0	0	0	0	0	0	0	0	0	0	0	0	0	0	0	0	0	0	0	0	0	0	0	0	0	0	0	0
TCGA-06-0879-01	GBM	0	0	0	0.0649334	0	0	0	0	0	0	0	0	0	0	0	0	0	0	0	0	0	0	0	0	1	1	0	0	1	1	0	0	0	0	0	0	0	0	0	0	0	0	0	0	0	0	0	0
TCGA-06-0881-01	GBM	0	0	0	0	0	0	0	0	0	0	0	0	0	0	0	0	0	0	0	0	0	0	0	0	0	0	0	0	0	0	0	0	0	0	0	0	0	0	0	0	0	0	0	0	0	0	0	0
TCGA-06-0882-01	GBM	0	0	0	0	0	0	0	0	0	0	0	0	0	0	0	0	0	0	0	0	0	0	0	0	0	0	0	0	0	0	0	0	0	0	0	0	0	0	0	0	0	0	0	0	0	0	0	0
TCGA-06-0939-01	GBM	0	0	0	0	0	0	0	0	0	0	0	0	0	0	0	0	0	0	0	0	0	0	0	0	0	0	0	0	0	0	0	0	0	0	0	0.000737199	0	0	0	0	0	0	0	0	0	0	0	0
TCGA-06-1084-01	GBM	0.780161	0	0	0.219707	1	1	0	0	0	0	0	0	0	0	0	0	0	0	0	0	0	0	0	0	0	0	0	0	0	0	0	0	0	0	0	0	0	0	0	0	0	0	0	0	0	0	0	0
TCGA-06-1086-01	GBM	0	0	0	0	0	0	0	0	1	1	0	0	1	1	0	0	0	0	0	0	0	0	0	0	0	0	0	0	0	0	0	0	0	0	0	0	0	0	0	0	0	0	0	0	0	0	0	0
TCGA-06-1087-01	GBM	0	0	0	0.115747	0	0.945318	0	0	0	0	0	0	0	0	0	0	0	0.0786681	0	0	1	1	0	0	0	0	1	1	0	0	1	1	0	0	0	0	0	0	0	0	0	0	0	0	0	0	0	0
TCGA-06-1800-01	GBM	0	0	0	0	0	0	0	0	0	0	0	0	0	0	0	0	0	0	0	0	0	0	0	0	0	0	1	1	0	0	1	1	0	0	0	0	0	0	0	0	0	0	0	0	0	0	0	0
TCGA-06-1801-01	GBM	0	0	0	0.0742567	0	0	0	0	0	0	0	0	0	0	0	0	0	0	0	0	0	0	0	0.0172624	0	0	0	0	0	0	0	0	0	0	0	0	0	0	0	0	0	0	0	0	0	0	0	0
TCGA-06-1802-01	GBM	0	0	0.423124	0	0	0	0	0	0	0	0	0	0	0	0	0	0	0	0	0	0	0	0	0	0	0	0	0	0.061496	0	0	0	0	0	0	0	0	0	0	0	0	0	0	0	0	0	0	0
TCGA-06-1804-01	GBM	0	0	0	0	0	0	0	0	0	0	0	0	0	0	0	0	0	0	0	0	0	0	0	0	0	0	0	0	0	0	0	0	0	0	0	0	0	0	0	0	0	0	0	0	0	0	0	0
TCGA-06-1805-01	GBM	0	0	0	0	0	0	0	0	0	0	0	0	0	0	0	0	0	0	0	0	0	0	0	0	0	0	0	0	0	0	0	0	0	0	0	0	0	0	0	0	0	0	0	0	0	0	0	0
TCGA-06-1806-01	GBM	0	0	0	0	0	0	0	0	0	0	0	0	0	0	0	0	0	0	0	0.478748	0	0	0	0	0	0	0	0	0	0	0	0	1	1	0	0	1	1	0	0	0	0	0	0.013053	0	0	0	0
TCGA-06-2557-01	GBM	1	1	0	0	1	1	0	0	0	0	0	0	0	0.130038	0	0	0	0	0	0	0	0	0	0	0	0	0	0	0	0	0	0	0	0	0	0	0	0	0	0	0	0	0	0	0	0	0	0.957153
TCGA-06-2558-01	GBM	0	0	0	0	0	0	0	0	0	0	0	0.0202192	0	0	0	0	0	0	0	0	0	0	0	0	0	0	0	0	0	0	0	0	0	0	0	0	0	0	0	0	0	0	0	0	0	0	0	0
TCGA-06-2559-01	GBM	0	0	0	0	0	0	0	0	0	0	0	0	0	0	0	0	0	0	0	0	0	0	0	0	0	0	0	0	0.0363827	0	0	0	0	0	0	0	0	0	0	0	0	0	0	0	0	0	0	0
TCGA-06-2561-01	GBM	0	0.386162	0	0	0	0	0	0	0	0	0	0	0	0	0	0	0	0	0	0	0	0	0	0	0	0	0	0	0	0	0	0	0	0	0	0	0	0	0	0	0	0	1	1	0	0	1	1
TCGA-06-2562-01	GBM	0	0	0	0	0	0	0	0	0	0	0	0	0	0	0	0	0	0	0	0	0	0	0	0	0	0	0	0	0	0	0	0	0	0	0	0	0	0	0	0	0	0	0	0	0	0	0	0
TCGA-06-2563-01	GBM	0	0	0	0	0	0	0	0	0	0	0	0	0	0	0	0	0	0	0	0	0	0	0	0.400302	0	0	0	0	0	0	0	0	0	0	0	0	0	0	0	0	0	0	0	0	0	0	0	0
TCGA-06-2564-01	GBM	0	0	0	0	0	0	0	0	0	0	0	0	0	0	0	0	0	0	0	0	0	0	0	0	0	0	0	0	0	0	0	0	0	0.00868905	0	0	0	0	0	0	0	0	0	0	0	0	0	0
TCGA-06-2565-01	GBM	0	0	0	0	0	0	0	0	0	0	0	0	0	0	0	0	0	0	0	0	0	0	0	0	0	0	0	0	0	0	0	0.00937351	0	0	0	0	0	0	0	0	0	0	0	0	0	0	0	0
TCGA-06-2566-01	GBM	0	0	0	0	0	0	0	0	0	0	0	0	0	0	0	0	0	0	0	0	0	0	0	0	0	0	0	0	0	0	0	0	0	0	0	0	0	0	0	0	0	0	0	0	0	0	0	0
TCGA-06-2567-01	GBM	0	0	0	0	0	0	0	0	0	0	0	0	0	0	0	0	0	0	0	0	0	0	0	0	0	0	0	0	0	0	0	0	0	0	0	0	0	0	0	0	0	0	0	0	0	0	0	0
TCGA-06-2569-01	GBM	0.255304	0	0	0	1	1	0	0	1	1	0	0	0.570239	0	0	0	0	0	0	0	0	0	0	0	0	0	0	0	0	0	1	1	0	0	0	0	0	0	1	1	0	0.123965	0	0	0	0.940987	0	0
TCGA-06-2570-01	GBM	0	0	0	0	0	0	0	0	0	0	0	0	0	0	0	0	0	0	0	0	0	0	0	0	0	0	0	0	0	0	0	0	0	0	0	0	0	0	0	0	0	0	0	0	0	0	0	0
TCGA-06-5408-01	GBM	0	0	0	0	0	0	0	0	0	0	0	0	0	0	0	0	0	0	0	0	0	0	0	0	0	0	0	0	0	0	0	0	0	0	0	0	0	0	0	0	0	0	0	0	0	0	0	0.934204
TCGA-06-5410-01	GBM	0	0	0	0	0	0	0	0	0	0	0	0	0	0	0	0	0	0	0	0	0	0	0	0.000430446	0	0	0	0	0	0	0	0	0	0	0	0	0	0	0	0	0	0	1	1	0	0	1	1
TCGA-06-5411-01	GBM	0	0	0	0	0	0	0	0	0	0	0	0	0	0	0	0	0	0	0	0	0	0	0	0	0	0	0	0	0	0	0	0	0	0	0	0	0	0	0	0	0	0	0	0	0	0	0	0
TCGA-06-5412-01	GBM	0	0	0	0	0	0	0	0	0	0	0	0	0	0	0	0	0	0	0	0.00920422	0	0	0	0	0	0	0	0	0	0	0	0	0	0	0	0	0	0	0	0	0	0	0	0	0	0	0	0
TCGA-06-5413-01	GBM	0	0	0	0	0	0	0	0	0	0	0	0	0	0	0	0	0	0	0	0	0	0	0	0	0	0	0	0	0	0	0	0	0	0	0	0	0	0	0	0	0	0	0.227995	0	0	0	1	1
TCGA-06-5414-01	GBM	0	0	0	0	0	0	0	0	0	0	0	0	0	0	0	0	0	0	0	0	0	0	0	0	0	0	0	0	0	0	0	0	0	0	0	0	0	0	0	0	0	0	0	0	0	0	0	0
TCGA-06-5415-01	GBM	0	0	0	0	0	0	0	0	0	0	0	0	0	0	0	0	0	0	0	0	0	0	0	0	0	0	0	0	0	0	0	0	0	0	0	0	0	0	0	0	0	0	0	0	0	0	0	0.999978
TCGA-06-5416-01	GBM	0	0	0	0	0	0	0	0	0	0	1	1	0	0	1	1	0	0	0	0.762064	0	0.800407	0	0	0	0	0	0	0	0	0	0	0	0	0	0	0	0.838658	0	0	0	0	1	1	0	0	1	1
TCGA-06-5418-01	GBM	0	0	0	0	0	0	0	0	0	0	0	0	0	0	0	0	0	0	0	0	0	0	0	0	0	0	0	0	0	0	0	0	0	0	0	0	0	0	0	0	0	0	0	0	0	0	0	0
TCGA-06-5856-01	GBM	1	1	0	0	1	1	0	0	0	0	0	0	0	0	0	0.0291266	0.523371	0	0	0	1	1	0	0	0.984175	0	0	0	0.940739	0	0	0	1	1	0	0	1	1	0	0	0	0	1	1	0	0	1	1
TCGA-06-5858-01	GBM	0	0	0	0	0	0	0	0	0	0	0	0	0	0	0	0	0	0	0	0	0	0	0	0	0	0	0	0	0	0	0	0	0	0	0	0	0	0	0	0	0	0	0	0	0	0	0	0
TCGA-06-5859-01	GBM	0.800551	0	0	0.199347	1	1	0	0	1	1	0	0	1	1	0	0	0	0	1	1	0	0.201276	0.798721	0	1	1	0	0	0.453788	0	0	0.546209	1	1	0	0	1	1	0	0	1	1	0	0	0.62988	0	0	0.370114
TCGA-06-6388-01	GBM	0	0	0	0	0	0	0	0	0	0	0	0	0	0	0	0	0	0	0	0	0	0	0	0	0	0	0	0	0	0	0	0.0448416	0	0	0	0	0	0	0	0	0	0	0	0	0	0	0	0
TCGA-06-6389-01	GBM	1	1	0	0	1	1	0	0	0	0	1	1	0	0	0.187568	0	1	1	0	0	1	1	0	0	0	0.562819	0.437041	0	0	0	1	1	0	0	0	0	0	0	0	0	1	1	0	0	0.987062	0	0	0.0129348
TCGA-06-6390-01	GBM	0	0	0	0	0	0	0	0	0	0	0	0	0	0	0	0	0	0	1	1	0	0	1	1	0	0	0	0	0	0	0	0.0878979	0	0	0	0	0	0	0	0	0	0	1	1	0	0	1	1
TCGA-06-6693-01	GBM	0	0	0	0.149417	0	0.558605	0	0	0	0	0	0	0	0	0	0	0	0	0	0	0	0	0	0.0522318	0	0	1	1	0	0	0	0	0	0	0	0	0	0	0	0	0	0	0	0	0	0	0	0
TCGA-06-6694-01	GBM	0	0	0	0	0	0	0	0	0	0	0	0	0	0	0	0	0	0	0	0	0	0.280268	0	0	0	0	0	0	0	0	0	0	0	0	0	0	0	0	0	0	0	0	1	1	0	0	1	1
TCGA-06-6695-01	GBM	0	0	0	0	0	0	0	0	0	0	0	0	0	0	0	0	0	0	0	0	0	0	0	0	0	0	0	0	0	0	0	0	0	0	0	0	0	0	0	0	0	0	0	0	0	0	0	0
TCGA-06-6697-01	GBM	0	0	0	0	0	0	0	0	0	0	0	0	0	0	0	0	0	0	0	0	0	0	0	0	0	0.99998	0	0	0	0	0	0	0	0	0	0	0	0	0	0	0	0.470921	0	0	0	0	0	0
TCGA-06-6698-01	GBM	0	0	0	0	1	1	0	0	0	0	0	0	0	0	0	0	0	0	0	0	0	0	0	0	0	0	0	0	0	0	0	0	0	0	0	0	0	0	0	0	0	0	0	0	0	0	0	0
TCGA-06-6699-01	GBM	0	0	0	0	0	0	0	0	0	0	0	0	0	0	0	0	0	0	0	0	0	0	0	0	0	0	0	0	0	0	0	0	0	0	0	0	0	0	0	0	0	0	0	0	0	0	0	0
TCGA-06-6700-01	GBM	0	0	0	0	0	0	0	0	0	0	0	0	0	0	0	0	0	0	0	0	0	0	0	0	0	0	0	0	0	0	0	0.00886165	0	0	0	0	0	0	0	0	0	0	0	0	0	0	0	0
TCGA-06-6701-01	GBM	0	0	0	0	0	0	0	0	0	0	0	0	0	0	0	0	0	0	0	0	0	0	0	0	0	0	0	0	0	0	0	0	0	0	0	0	0	0	0	0	0	0	0	0	0	0.0113398	0	0
TCGA-06-A5U0-01	GBM	0	0	0	0	1	1	0	0	0	0	0	0	0	0	0	0	0	0	0	0	0	0	0	0	0	0	0	0	0	0	0	0.939071	0	0	0	0	0	0	0	0.680853	1	1	0	0	1	1	0	0
TCGA-06-A5U1-01	GBM	0	0	0	0	0	0	0	0	0	0	0	0	0	0	0	0	0	0	0	0	0	0	0.400135	0.00267619	0	0	0	0	0	0	0	0	0	0	0	0	0	0	0	0	0	0	0	0	0	0	0	0.928062
TCGA-06-A6S0-01	GBM	0	0	0	0	0	0	0	0	0	0	0	0	0	0	0	0	0	0	0	0	0	0	0	0	0	0	0	0.837481	0	0	0	0	0	0	0	0	0	0	0	0	0	0	0	0	0	0	0	0
TCGA-06-A6S1-01	GBM	0	0	0	0	0	0	0	0	0	0	0	0	0	0	0	0	0	0	0	0	0	0	0	0	0	0	0	0	0	0	0	0	0	0	0	0	0	0	0	0	0	0	0	0	0	0	0	0.97967
TCGA-06-A7TK-01	GBM	0	0	0	0	0	0	0	0	0	0	0	0	0	0	0	0	0	0	0	0	0	0	0	0	0	0	0	0	0	0	0	0	0	0	0	0	0	0	0	0	0	0	0	0	0	0	0	0
TCGA-06-A7TL-01	GBM	0	0	0	0	0	0	0	0	0	0	0	0	0	0	0	0	0	0.449757	0	0	0	0	0	0	0	0	0	0	0	0	0	0	0	0	0	0	0	0	0	0.402789	0	0	0	0	0	0	0	0
TCGA-08-0244-01	GBM	0	0	1	1	0	0	0.808651	0	0	0	0	0	0	0	0	0	0	0	0	0	0	0	0	0	0	0	0	0	0	0	0	0	0	0	0	0	0	0	0	0	0	0	0	0	0	0	0	0
TCGA-08-0245-01	GBM	1	1	0	0	1	1	0	0	1	1	0	0	1	1	0	0	0	0.551518	0	0	0	0	0	0	0.744347	0	0	0	1	1	0	0	0	0	1	1	0	0	0	0	1	1	0	0	0.987606	0	0	0
TCGA-08-0246-01	GBM	0	0	0	0	0	0	0	0	0	0	0	0	0	0	0	0	0	0	1	1	0	0	1	1	1	1	0	0	1	1	0	0	0	0	0	0	0	0	0	0	0	0	1	1	0	0	1	1
TCGA-08-0344-01	GBM	0	0	1	1	0	0	0.000419384	0	0	0	0	0	0	0	0	0	0	0	0	0	0	0	0	0	0	0	0	0	0	0	0	0	0	0	0	0	0	0	0	0	0	0	0	0	0	0	0	0
TCGA-08-0345-01	GBM	0	0	0	0	0	0	0	0	0	0	0	0.0727632	0	0	0	0	1	1	0	0	1	1	0	0	0	0	0	0.0243898	0	0	0	0	0	0	0	0	0	0	0	0	0	0	0	0	0	0	0	0
TCGA-08-0346-01	GBM	0	0	0	0	0	0	0	0	1	1	0	0	1	1	0	0	1	1	0	0	1	1	0	0	0	0	0	0	0	0	0	0	0	0	0	0	0	0	0	0	0	0	0	0	0	0	0	0
TCGA-08-0347-01	GBM	0	0	0	0	0	0	0	0	0	0	0	0	0	0	0	0	0	0	0	0	0	0	0	0	0	0	0	0	0.0405908	0	0	0	0	0	0	0	0	0	0	0	0	0	0	0	0	0	0	0
TCGA-08-0348-01	GBM	0	0	0	0	0	0	0	0	0	0	0	0	0	0	0	0	0	0	0	0	0	0	0	0	0	0	0	0	0	0	0	0	0	0	0	0	0	0	0	0	0	0	0	0	0	0	0	0
TCGA-08-0349-01	GBM	1	1	0	0	0.999935	0	0	0	0	0	0	0	0	0	0	0	0	0	0	0	0	0	0	0	0	0	0	0	0	0	0	0	0	0	0	0	0	0	0	0	0	0	0	0	0	0	0	0
TCGA-08-0350-01	GBM	0	0	0.0161815	0	0	0.999938	2.52e-05	0	0	0	0	0	0	0	0	0	0	0	0	0	0	0	0	0	0	0	0	0.115401	0	0	0	0.1259	1	1	0	0	0.0450099	0	0	0.253286	0	0	0	0	0	0	0	0
TCGA-08-0351-01	GBM	0	0	0	0	0	0	0	0	0	0	0	0	0	0	0	0	0	0	0	0	0	0	0	0.114671	0	0	0	0.965322	0	0	0	0.189969	0	0	0	0.122343	0	0	0	0	0	0	0	0	0	0	0	0
TCGA-08-0352-01	GBM	0	0	0	0	0	0	0	0	0	0	0	0	0	0	0	0	0	0	0.0272493	0	0	0	1.5e-05	0	0	0	0	0	0	0	0	0	0	0	0	0	0	0	0	0	0	0	0	0	0	0	0	0
TCGA-08-0353-01	GBM	0	0	0	0	0	0	0	0	0	0	0	0	0	0	0	0	0	0	0	0	0	0.519796	0	0	0	0	0	0	0	0	0	0	0	0	0	0	0	0	0	0	0	0	0	0.354028	0	0	0	0
TCGA-08-0354-01	GBM	0	0	0	0	0	0.0493577	0	0	0	0	0	0.0658716	0	0	0	0	0	0	0	0	0	0	0	0	0	0	0	0	0	0	0	0.0697123	0	0	0	0	0	0	0	0	0	0	0	0	0	0	0	0
TCGA-08-0355-01	GBM	0	0	0	0	0	0	0	0	0	0	0	0	0	0	0	0	0	0	0	0	0	0	0	0	0	0	0	0	0	0	0	0	0	0	0	0	0	0	0	0	0	0	0	0	0	0	0	0
TCGA-08-0356-01	GBM	0	0	0	0	0	0	0	0	0	0	0	0	0	0	0	0	0	0	0	0	0	0	0	0	0	0	0	0	0	0	0	0.118597	0	0	0	0	0	0	0	0	0	0	0	0	0	0	0	0.131716
TCGA-08-0357-01	GBM	0	0	0	0	0	0	0	0	0	0	0	0	0	0	0	0	0	0	0	0	0	0	0	0	0	0	0	0	0	0	0	0	0	0	0	0	0	0	0	0	0	0	0	0	0	0	0	0
TCGA-08-0358-01	GBM	0	0	0	0	0	0	0	0	0	0	0	0	0	0	0	0	0	0	0	0	0	0	0	0	0	0	0	0	0	0	0	0.0889574	0	0	0	0	0	0	0	0	0	0	0	0	0	0	0	0.999338
TCGA-08-0359-01	GBM	0	0	0	0	0	0	0	0	0	0	0	0	0	0	0	0	0	0	0	0	0	0	0	0	0	0	0	0	0	0	0	0	0	0	0	0	0	0	0	0	0	0	0	0	0	0	0	0
TCGA-08-0375-01	GBM	0	0	0	0	0	0	0	0	0	0	0	0	0	0	0	0	0	0	0	0	0	0	0	0	0	0	0	0	0	0	0	0	0	0	0	0	0	0	0	0	0	0	1.01e-05	0	0	0	1	1
TCGA-08-0380-01	GBM	0	0	0	0	0	0.0356497	0	0	0	0	0	0	0	0	0	0.0272906	0	0	0	0	0	0	0	0	0	0	0	0.00405155	0	0	0	0	0	0	0	0	0	0	0	0	0	0	0.166119	0	0	0	1	1
TCGA-08-0386-01	GBM	0.932571	1	0	0	1	1	0	0	0	0	0	0	0	0	0	0	0	0	0	0	0	0	0	0	0	0	0	0	0	0	0	0	0	0	0	0	0	0	0	0	1	1	0	0	1	1	0	0
TCGA-08-0389-01	GBM	0	0	0	0.057175	0	0	0	0	0	0	0	0	0	0	0	0	0	0	0	0	0	0	0	0	0	0	0	0	0	0	0	0	0	0	0	0	0	0	0	0	0	0	0	0	0	0	0	0
TCGA-08-0390-01	GBM	0	0	0	0.147836	0	0	0	0	0	0	0	0.099258	0	0	0	0	0	0	1	1	0	0	0.216529	0	0	0	0	0	0	0	0	0	0	0	0	0	0	0	0	0	0	0	0	0	0	0	0	0
TCGA-08-0392-01	GBM	0	0	0	0	0	0	0	0	0	0	0	0	0	0	0	0	0	0	0	0	0	0.805935	0.194023	0	0	0	0	0	0	0	0	0	0	0	0	0	0	0	0	0	0	0	0	0	0	0	0	0
TCGA-08-0509-01	GBM	0	0	0	0	0	0	0	0	0	0	0	0	0	0	0	0	0	0	0	0	0	0	0	0	0	0	0	0	0	0	0	0	0	0	0	0	0	0	0	0	0	0	0	0	0	0	0	0
TCGA-08-0510-01	GBM	0	0	0	0	0	0	0	0.82691	1	1	0	0	1	1	0	0	1	1	0	0	1	1	0	0	1	1	0	0	1	1	0	0	1	1	0	0	1	1	0	0	0	0	1	1	0	0	1	1
TCGA-08-0512-01	GBM	0	0.176791	0	0	0	0	0	0	0	0	0	0	0	0	0	0	0	0	0	0	0	0	0	0	1	1	0	0	1	1	0	0	0	0.0477319	0	0	0	0.050761	0	0	0	0	1	1	0	0	1	1
TCGA-08-0514-01	GBM	0	0	0	0.0546371	0	0	0	0	0	0	0	0	0	0	0	0	0	0	0	0	0	0	0	0	0	0	0	0	0	0	0	0	0	0	0	0	0	0	0	0	0	0	0	0	0	0	0	0
TCGA-08-0516-01	GBM	0	0	0	0	0	0	0	0	0	0	0	0	0	0	0	0	0	0	1	1	0	0	1	1	0.983026	0	0	0.0167935	1	1	0	0	0	0	1	1	0	0	1	1	1	1	0	0	1	1	0	0
TCGA-08-0517-01	GBM	0	0	0	0.0259423	0	0	0	0	1	1	0	0	0	0	0	0	0	0	0	0	0	0	0	0	0	0	0	0	0	0	0	0	0	0	1	1	0	0	0.0757901	0.205515	0	0	0	0	0	0	0	0.999338
TCGA-08-0518-01	GBM	0.00076649	0	0	0	0	0	0	0	0	0	0	0	0	0	0	0	0	0	0	0	0	0	0	0	0	0	0	0	0	0	0	0	1	1	0	0	0.567656	0	0	0	0	0	0	0	0	0	0	0
TCGA-08-0520-01	GBM	0	0	0	0.057716	0	0	0	0	0	0	0	0	0	0	0	0	0	0	0	0.0100471	0	0.223106	0	0	0	0	0	0	0	0	0	0	0	0	0	0	0	0	0	0.00366388	0	0	0	0	0	0	0	0
TCGA-08-0521-01	GBM	0	0	0	0	0	0	0	0	0	0	0	0	0	0	0	0	0	0	0	0	0	0	0	0	0	0	0	0	0	0	0	0	0	0	0	0	0	0	0	0	0	0	0	0	0	0	0	0
TCGA-08-0524-01	GBM	0	0	0	0	1	1	0	0	0	0	0	0	0	0.638975	0	0	0	0	0	0	0	0	0	0	0	0	0	0	0	0	0	0	1	1	0	0	0.000761435	0	0	0	0	0	0	0	0	0	0	0
TCGA-08-0525-01	GBM	0	0	0	0	0	0	0	0	0	0	0	0	0	0	0	0	0	0	0	0	0	0.33929	0	0	0	0	1	1	0	0	0.271967	0	0	0	0	0	0	0	0	0	0	0	0	0	0	0	0	0.898095
TCGA-08-0529-01	GBM	0	0	0	0	0	0	0	0	0	0	0	0	0	0	0	0	0	0	0	0	0	0	0	0	0	0	0	0	0	0	0	0	0	0	0	0	0	0	0	0	0	0	0	0	0	0	0	0
TCGA-08-0531-01	GBM	0.994943	0	0	0.00503928	1	1	0	0	0	0	0	0	0	0	0	0	0	0	0	0	0	0	0	0.117833	1	1	0	0	0.106393	0	0	0	0	0	0	0	0	0	0	0	0	0	0	0	0	0	0	0
TCGA-09-0364-01	OV	0.135108	0	0	0	0.281286	0	0	0	1	1	0	0	0.0385755	0	0	0	0.782913	0	0	0.191709	1	1	0	0	0	0	0	0	0	0	0	0.9278	0	0	0	0.852681	0	0	0	0	0	0	0	0	0	0	0	0.53975
TCGA-09-0365-01	OV	0	0.351794	0	0	1	1	0	0	1	1	0	0	0.514017	0	0	0	0.00870138	0	0	0.540259	1	1	0	0	0	0	1	1	0	0	0	0	0	0	1	1	0	0	1	1	0	0	0	0	0	0	0	0.998438
TCGA-09-0366-01	OV	1	1	0	0	0.0254014	0	0	0	1	1	0	0	1	1	0	0	0.0799075	0	0	0	1	1	0	0	0	0	0	0	0	0	0	0.624498	1	1	0	0	0	0	0	0	1	1	0	0	0.375001	0	0	0
TCGA-09-0367-01	OV	0	0	0	0	0	0	0	0.005481	0.0102882	0.53286	0	0	1	1	0	0	0	0	0	0.573904	0	0	0	0	0	0	0	0.530462	0	0	0	0.774666	1	1	0	0	0.0184024	0	0	0	0	0.505432	0	0	0	0	0	0.970012
TCGA-09-0369-01	OV	0.429103	0.191667	0	0	1	1	0	0	1	1	0	0	0.609072	0	0	0.390922	0	0	1	1	1	1	0	0	0.966704	0	0	0.0312013	0.0402481	0	0	0.959747	0	0	2.65e-05	0	0	0	1	1	0	0.272216	0	0	0	0.08737	0	0
TCGA-09-1659-01	OV	0.17141	0	0	0.0516025	1	1	0	0	0	0	0	0	0	0	0	0	0.430419	0	0	0.569528	0.87772	0	0	0	0	0	0.895681	0	0	0	1	1	0	0.810432	0	0	0.0246459	0	0	0	1	1	0	0	0.0976152	0	0	0.919573
TCGA-09-1661-01	OV	0.00913891	0	0	0	1	1	0	0	1	1	0	0	1	1	0	0	0	0	0	0.184717	0	0.327167	0	0	0	0	1	1	0	0	1	1	0	0.999974	0	0	0	0	1	1	1	1	0	0	2.24e-05	0	0	0.999338
TCGA-09-1662-01	OV	0	0	0	0.295135	0	0	0	0	0	0	0	0	0	0	0	0	0	0	0	0	0	0	0	0	0	0	0.802571	0	0	0	1	1	0	0.568988	0.144047	0	0	0	0.351734	0.0260967	0	0	0	0	0	0	0	0.864316
TCGA-09-1664-01	OV	0	0	0	0.238013	0	0	0	0	0	0	0	0	0	0	0	0	0	0	0	0	0	0	0	0	0	0	0	0	0	0	0	0.782279	0	0	0	0	0	0	0	0	0	0	0	0	0	0	0	0
TCGA-09-1665-01	OV	0.568307	0.0292448	0	0	0.738923	0	0	0	1	1	0	0	1	1	0	0	0.927992	0	0	0.620903	1	1	0	0	0.379013	0	0	0.620923	0.289333	0	0	0.749244	0.047371	0.444437	0	0	0	0.289688	0.824171	0	0	0	0.0711187	0	0	0	0.236334	0.0977514
TCGA-09-1666-01	OV	0.756828	0	0	0.243138	1	1	0	0	0.363891	0.0161932	0	0	1	1	0	0	1	1	0	0	0.888593	0	0	0.111389	1	1	0	0	0.0925666	0	0	0.854624	1	1	0	0	1	1	0	0	0.93323	0	0	0.0667039	0.324165	0	0	0.675726
TCGA-09-1667-01	OV	0.989061	0	0	0	1	1	0	0	0	0.431504	0	0	0	0	0	0	0.213498	0	0	0	1	1	0	0	0	0	0	0	0	0	0	0	0	0	0	0	0	0.18585	0	0	1	1	0	0	0.0124022	0.436903	0	0
TCGA-09-1668-01	OV	0.0430532	0	0	0.307251	1	1	0	0	0	0	0	0	0	0	0	0	0.0323989	0	0	0	1	1	0	0	0.113566	0.238615	0	0	1	1	0	0	0	0	0.000301321	0	0	0	0.32772	0	1	1	0	0	0.417288	0	0	0.582677
TCGA-09-1669-01	OV	0	0.0657725	0	0	0	0.105913	0	0	0	0	0	0	0	0	0	0	0	0	0	0	0	0.564679	0	0	0	0	0	0.942118	0	0	0	0	0	0	0	0	0	0	1	1	0	0.569994	0	0	0	0	0	0
TCGA-09-1670-01	OV	0.7395	0	0	0	1	1	0	0	1	1	0	0	1	1	0	0	0.374813	0	0	0.625137	1	1	0	0	0	0	1	1	0	0	1	1	1	1	0	0	0.0794892	0.384652	0	0	0	0	1	1	0	0	1	1
TCGA-09-1672-01	OV	0	0	0	0.999971	1	1	0	0	1	1	0	0	1	1	0	0	1	1	0	0	1	1	0	0	0	0	0	0	0	0	0	0	0	0	0	0	0	0	0	0	0	0	1	1	0	0	1	1
TCGA-09-1673-01	OV	0	0.330449	0	0	0	0	0	0	0	0	1	1	0	0	1	1	0	0.926618	0	0	0	0	0	0	0	0	0	0	0	0	0	0.708892	0	0.0350945	0	0	0	0	0	0	0	0.0441587	0	0	0	0	0	0
TCGA-09-1674-01	OV	0	0	0	0	1	1	0	0	1	1	0	0	0.156139	0	0	0	0.00870138	0	0	0	1	1	0	0	0	0	0	0	0	0	0	0.818488	1	1	0	0	0	0	0	0	0.861522	0	0	0	0.325815	0	0	0
TCGA-09-1675-01	OV	1	1	0	0	0.340033	0.266299	0	0	0.762682	0	0	0	1	1	0	0	1	1	0	0	1	1	0	0	1	1	0	0	0.186705	0	0	0	1	1	0	0	0.122136	0.0613065	0	0	1	1	0	0	0.438581	0	0	0.561308
TCGA-09-2043-01	OV	0.0244357	0.0757705	0	0	0.216394	0	0	0.119771	0	0	0	0	0	0.950708	0	0	1	1	0	0	0.329116	0.046889	0	0	0	0	1	1	0	0	0.0509395	0.659637	0	0.977987	0	0	0	0	0	0	0	0	0	0.169565	0	0	0	0
TCGA-09-2044-01	OV	0	0.028323	0	0	0	0.748356	0	0	0.511558	0	0	0.61233	0.172764	0	0	0.0507024	0	0.764441	0	0	0	0.891697	0	0	0	0	1	1	0.0374805	0	0	0.799397	0	0.979817	0	0	0	0	0	0	1	1	0	0	0.766262	0	0	0.233287
TCGA-09-2049-01	OV	0.0890945	0	0	0.262731	1	1	0	0	0	0.296131	0	0	0	0.646864	0	0	0.00411378	0	0	0.927581	1	1	0	0	0	0	0.994818	0	0	0	1	1	0	0	0	0	0	0	0	0.995076	0.825701	0	0	0	0.384315	0	0	0
TCGA-09-2050-01	OV	1	1	0	0	1	1	0	0	0.734048	0	0	0.26589	1	1	0	0	0	0	1	1	0	0.742286	0.257506	0	0.0151883	0	0	0.984777	0.14321	0	0	0.85676	1	1	0	0	0.00522478	0	0	0.994275	1	1	0	0	1	1	0	0
TCGA-09-2051-01	OV	0.0264603	0.431198	0	0	1	1	0	0	0.106409	0	0	0	0.216349	0	0	0	0	0	0	0	0	0.963657	0	0	0	0	1	1	0	0	1	1	0.275474	0	0	0	0	0	0	0	1	1	0	0	0.247817	0	0	0.0905077
TCGA-09-2053-01	OV	1	1	0	0	1	1	0	0	1	1	0	0	1	1	0	0	0.159199	0	0	0.840731	1	1	0	0	0	0	1	1	0	0	1	1	1	1	0	0	1	1	0	0	0.790656	0	0	0.209258	0.0351107	0	0	0.964818
TCGA-09-2054-01	OV	0.12025	0	0	0.0655423	1	1	0	0	1	1	0	0	3.36e-05	0	0	0	0	0	1	1	0	0	0.224888	0	0	0	0.640733	0	0	0	0	0.995986	1	1	0	0	0	0	0	0.958317	1	1	0	0	0.0861385	0	0	0
TCGA-09-2055-01	OV	0	0	0	0.242491	0.0139245	0	0	0	0	0	0	0	0	0	0	0	0	0	0	0	0	0	0	0	0	0.418624	0	0	0	0	0	0.979682	0	0	0	0	0	0	0	0.0150701	0	0.603267	0	0	0	0	0	0.8666
TCGA-10-0925-01	OV	0	0	0	0.308832	1	1	0	0	0	0	0	0	0	0	0	0	0	0.368313	0	0	0	0	0	0	0	0.427943	0	0	0	0	0	0	0	0	0	0	0	0.0295128	0	0	0	0.889694	0	0	0	0	0	0.949687
TCGA-10-0926-01	OV	0	0	0	0	0	0	0	0	0	0	0	0	0	0	0	0	0	0	0	0	0	0	0	0	1	1	0	0	0.0527635	0	0	0.947217	0	0	0	0	0	0	0	0	0	0	1	1	0	0	1	1
TCGA-10-0927-01	OV	0	0	0	0	0	0	0	0	0.956526	0	0	0	1	1	0	0	0	0	0	0	0	0	0	0	0	0	1	1	0	0	1	1	1	1	0	0	0.0424486	0.266062	0	0	0	0	0	0	0	0	0	0.963321
TCGA-10-0928-01	OV	0.00561465	0	0	0.994354	1	1	0	0	0.684739	0	0	0.803218	0.965483	0	0	0.0344995	0	0	1	1	0	0.793053	0.206878	0	0	0	0	0.946633	0	0	1	1	0	0.911479	0.088468	0	1	1	0	0	1	1	0	0	0.00322902	0	0	0.996638
TCGA-10-0930-01	OV	0.504299	1	0	0	0.168308	0.267425	0	0	0.954259	0	0	0	0.440014	0	0	0.228815	1	1	0	0	1	1	0	0	0	0	1	1	0	0	1	1	1	1	0	0	0.59587	0	0	0.404108	0.307281	0	0	0	0.967439	0	0	0
TCGA-10-0931-01	OV	0.709576	0	0	0	0.312784	0	0	0	0	0	0	0	0	0	0	0.0375933	0	0.404849	0.260334	0	0	0	0	0	0	0	0	0.0051821	0	0	0	0.567653	0	0.0338066	0	0	0	0	0.242995	0	0	0	0	0	0	0	0	0.14384
TCGA-10-0933-01	OV	0	0	1	1	0	0.999981	0	0	1	1	0	0	1	1	0	0	0	0	1	1	0.999964	0	0	0	0	0	1	1	0	0	1	1	1	1	0	0	0	0	1	1	1	1	0	0	0.635546	0	0	0.364427
TCGA-10-0934-01	OV	0	0	0	0	0	0.999432	0	0	0.247544	0	0	0	0	0	1	1	0	0	0	0	0	0.285727	0	0	0	0	0	0	0	0	0	0	0	0	0	0	0	0	0.604941	0	0	0	0	0	0	0	0	0
TCGA-10-0935-01	OV	0.0905775	0	0	0.744171	1	1	0	0	1	1	0	0	1	1	0	0	1	1	0	0	1	1	0	0	0	0	1	1	0	0	1	1	0	0	0	0	0	0.126552	0.342649	0	0	0	0.196457	0	0	0	1	1
TCGA-10-0936-01	OV	0	0	0	0.968517	0	0.236877	0	0	0	0	0.802675	0	0	0	0.00162664	0.628554	1	1	0	0	1	1	0	0	0	0.109154	0.1644	0	0	0	7.38e-06	0	1	1	0	0	1	1	0	0	0	0	0.965804	0	0	0	1	1
TCGA-10-0937-01	OV	0	0	0	0	0	0	0	0	0	0	0	0	0	0	0	0	0	0	0	0	0	0.303071	0	0	0	0.23658	0	0	0	0	0	0.782612	0	0.650359	0	0	0	0.206131	0	0	0	0.247396	0	0	0	0	0	0.518488
TCGA-10-0938-01	OV	0.190826	0	0	0	1	1	0	0	0	0	0	0	0	0.754277	0	0	0	0	1	1	0	0	1	1	0	0	0	0	0	0	0	0	0	0	0	0	0	0	1	1	0	0	0	0	0	0	0	0.413875
TCGA-12-0615-01	GBM	0	0	0.459086	0	0.594222	0.000165805	0	0	0	0	0.0100956	0	0	0	0.321355	0	1	1	0	0	1	1	0	0	0	0	0	0	0	0	0	0	0	0	0	0	0	0	0	0	0	0	0	0	0	0	0	0.980436
TCGA-12-0616-01	GBM	0	0	0	0	0	0	0	0	0	0	0	0	0	0	0	0	0	0	0	0	0	0	0	0	0	0	0	0	0	0	0	0	0	0	0	0	0	0	0	0	0	0	0	0	0	0	0	0
TCGA-12-0618-01	GBM	0	0	0	0	0	0	0	0	0	0	0	0	0	0	0	0	0	0	0	0	0	0	0	0	0	0	0	0	0	0	0	0	0	0	0	0	0	0	0	0	0	0	0	0	0	0	0	0
TCGA-12-0619-01	GBM	1	1	0	0	1	1	0	0	0	0	0	0	0	0	0	0	0	0	0	0	0	0.809895	0	0	0	0	0.898642	0	0	0	1	1	0	0	0	0	0	0	0	0	1	1	0	0	1	1	0	0
TCGA-12-0620-01	GBM	0	0	0	0	0	0	0	0	0	0	0	0	0	0	0	0	0	0	0	0	0	0	0	0	0	0	0	0.392302	0	0	0	0	0	0	0	0	0	0	0	0	0	0	0	0	0	0	0	0
TCGA-12-0654-01	GBM	0	0	0	0	0	0	0	0	0	0	0	0	0	0	0	0	0	0	0	0	0	0	0	0	0	0	0	0	0	0	0	0	0	0	0	0	0	0	0	0	0	0	0	0	0	0	0	0.999338
TCGA-12-0656-01	GBM	0	0	0	0	0	0	0	0	0	0	0	0	0	0	0	0	0	0	0	0	0	0	0	0	0	0	0	0	0	0	0	0	0	0	0	0	0	0	0	0	0	0	0	0	0	0	0	0.848358
TCGA-12-0657-01	GBM	0	0	0	0	0	0	0	0	0	0	0	0	0	0	0	0	0	0	0	0	0	0	0	0	0	0	0	0	0	0	0	0	0	0	0	0	0	0	0	0	0	0	0	0	0	0	0	0
TCGA-12-0662-01	GBM	1	1	0	0	0.268963	0	0	0	0	0	0	0	0	0	0	0	0	0	0	0	0	0	0	0	0	0	0	0	0	0	0	0	0	0	0	0	0	0	0	0	0	0	0	0	0	0	0	0
TCGA-12-0670-01	GBM	0	0	0	0	0	0	0	0	0	0	0	0	0	0	0	0	0	0	0	0	0	0	0	0	0	0	0	0	0	0	0	0	0	0	0	0	0	0	0	0	0	0	0	0	0	0	0	0
TCGA-12-0688-01	GBM	0	0	0	0.066294	0	0	0	0	0	0	0	0	0	0	0	0	0	0	0	0	0	0	0	0	0	0	0	0	0	0	0	0	0	0	0	0	0	0	0	0	0	0	0	0	0	0	0	0
TCGA-12-0691-01	GBM	0	0	0	0	0	0	0	0	0	0	0	0.0418158	0	0	0	0	0	0.00922724	3.7e-06	0	0	0	0.740395	0	0	0.745671	0	0	0	0	0	0.194523	1	1	0	0	1	1	0	0	0	0	1	1	0	0	1	1
TCGA-12-0692-01	GBM	0	0	0	0	0	0	0	0	0	0	0	0	0	0	0	0	0	0	0	0	0	0	0	0	0	0	0	0	0	0	0	0	0	0	0	0	0	0	0	0	0	0	0	0	0	0	0	0
TCGA-12-0703-01	GBM	0	0	0	0	0	0	0	0	0	0	0	0	0	0	0	0	0	0	0	0	0	0	0	0	0	0	0	0	0	0	0	0	0	0	0	0	0	0	0	0	0	0	0	0	0	0	0	0
TCGA-12-0707-01	GBM	0	0	0	0	0	0	0	0	0	0	0	0	0	0	0	0	0	0	0	0	0	0	0	0	0	0	0	0	0	0	0	0	0	0	0	0	0	0	0	0	0	0	0	0	0	0	0	0
TCGA-12-0769-01	GBM	0	0	0	0	0	0	0	0	0	0	0	0	0	0	0	0	0	0	0	0	0	0	0	0	0	0	0	0	0	0	0	0	0	0	0	0	0	0	0	0	0	0	0	0	0	0	0	0
TCGA-12-0772-01	GBM	0	0	0	0	0	0	0	0	0	0	0	0	0	0	0	0	0	0	0	0	0	0	0	0	0	0	0	0	0	0	0	0	0	0.084299	0	0	0	0	0	0	0	0	0	0	0	0	0	0.378279
TCGA-12-0773-01	GBM	0	0	0	0	0	0.999975	0	0	0	0	0	0	0	0	0	0	0	0	0	0	0	0	0	0	0	0	0	0	0	0	0	0	0	0	0	0	0	0	0	0	0	0	0	0	0	0	0	0
TCGA-12-0775-01	GBM	0	0	0	0	0	0	0	0	0	0	0	0	0	0	0	0	0	0	0	0	0	0	0	0	0	0	0	0	0	0	0	0	0	0	0	0	0	0	0	0	0	0	0	0	0	0	0	0
TCGA-12-0776-01	GBM	0	0	0	0	0	0	0	0.310791	0	0	0	0	0	0	0	0	0	0	0.781564	0	0	0	1	1	0	0	0	0	0	0	0	0	0	0	0	0	0	0.0103183	0	0	0	0	0	0	0	0	0	0
TCGA-12-0778-01	GBM	0	0	0	0	0	0	0	0	1	1	0	0	1	1	0	0	0	0	0	0	0	0	0	0	0	0	0	0	0	0	0	0	1	1	0	0	1	1	0	0	0	0	0	0	0	0	0	0
TCGA-12-0780-01	GBM	0	0	0	0	0	0	0	0	0	0	0	0	0	0	0	0	0	0	0	0	0	0	0	0	0	0	0	0	0	0	0	0	0	0	0	0	0	0	0	0	0	0	0	0	0	0	0	0.672024
TCGA-12-0818-01	GBM	0	0	0	0	0	0	0	0	0	0	0	0	0	0	0	0	0	0	0	0	0	0	0	0	0	0	0	0	0	0	0	0	0	0	0	0	0	0	0	0.75427	0	0	0	0	0	0	0	0
TCGA-12-0819-01	GBM	0	0	0.263474	0	0	0	0	0	0	0	0	0	0	0	0	0	0	0	0	0	0	0	0	0	0	0	0	0	0	0	0	0	0	0	0	0	0	0	0	0	0	0	0	0	0	0	0	0
TCGA-12-0820-01	GBM	0	0	0	0.217359	0	0	0	0	0	0	0	0	0	0	0	0	0	0	0	0	0	0	0	0	0	0	0	0	0	0	0	0.0327735	0	0	0	0	0	0	0	0	0	0	0	0	0	0	0	0
TCGA-12-0821-01	GBM	0	0	0	0	0	0	0	0	0	0	0	0	0	0	0	0	0	0	0	0	0	0	0	0	0	0	0	0	0	0	0	0	0	0	0	0	0	0	0	0	0	0	0	0	0	0.00289465	0	0
TCGA-12-0822-01	GBM	0	0	0	0	0	0	0	0	0	0	0	0	0	0	0	0	1	1	0	0	0.035595	0.30498	0	0	0	0	0	0	0	0	0	0	0	0	0	0	0	0	0	0	0	0	1	1	0	0	1	1
TCGA-12-0826-01	GBM	1	1	0	0	1	1	0	0	0	0	0	0.99995	0	0	0	0	0	0	0.287209	0	0	0	1	1	0	0	0	0	0	0	0	0	0	0	0	0	0	0.0668168	0	0	0	0	0	0	0	0	0	0
TCGA-12-0827-01	GBM	0	0	0	0	0.108706	0	0	0	0	0	0	0	0	0	0	0	0	0	0	0	0	0	0	0	0	0	1	1	0	0	0.0789451	0	0	0	0	0	0	0.0874182	0	0	0	0	0	0	0	0	0	0
TCGA-12-0828-01	GBM	0	0	0	0	0	0	0	0	0	0	0	0	0	0	0	0	0	0	0	0	0	0	0	0	0	0	0	0	0	0	0	0	0	0	0	0	0	0	0	0	0	0	0	0	0	0	0	0
TCGA-12-0829-01	GBM	0	0	0	0	0	0	0	0	0	0	0	0	0	0	0	0	0	0	0	0	0	0	0	0.0555081	0	0	0	0	0	0	0	0	0	0	0	0	0	0	0	0	0	0	0	0	0	0	0	0
TCGA-12-1088-01	GBM	0	0	0	0	0	0	0	0	0	0	0	0	0	0	0	0	1	1	0	0	1	1	0	0	0	0	0	0	0	0	0	0	0	0	0	0	0	0	0	0	0	0	0	0	0	0	0	0
TCGA-12-1089-01	GBM	0	0	0	0	0	0	0	0	0	0	0	0	0	0	0	0	0	0	0	0	0	0	0	0	0	0	0	0	0	0	0	0	0	0	0	0	0	0	0	0	0	0	0	0	0	0	0	0
TCGA-12-1090-01	GBM	0	0	0	0	0	0	0	0	0	0	0	0	0	0	0	0	0	0	0	0	0	0	0	0	0	0	0	0	0	0	0	0	0	0	0	0	0	0	0	0	0	0	0	0	0	0	0	0
TCGA-12-1091-01	GBM	0	0.363513	0	0	0	0	0	0	0	0	0	0	0	0	0	0	0	0	0	0	0	0	0	0	0	0	0	0	0	0	0	0	0	0.0641504	0	0	0	0	0	0	0	0	0	0	0	0.064007	0	0
TCGA-12-1092-01	GBM	0	0	0	0	0	0	0	0	0	0	0	0	0	0	0	0	0	0	0	0	0	0	0	0	0	0	0	0	0	0	0	0	0	0	0	0	0	0	0	0	1	1	0	0	1	1	0	0
TCGA-12-1093-01	GBM	0.764298	0	0	0	1	1	0	0	0	0	0	0	0	0	0	0	0	0	0	0	0	0	0	0	0	0	0	0	0	0	0	0	0	0	0	0	0	0	0	0	0	0	0	0	0	0	0	0.636203
TCGA-12-1094-01	GBM	0	0	0	0	0	0	0	0	0	0	0	0	0	0	0	0	0	0	0	0	0	0	0	0	0	0	0	0	0	0	0	0	0	0	0	0	0	0	0	0	0	0	0	0	0	0	0	0
TCGA-12-1095-01	GBM	0	0	0	0.143605	0	0	0	0	0	0	0	0	0	0	0	0	0	0	0	0	0	0	0	0	0	0	0	0	0	0	0	0	0	0	0	0	0	0	0	0	0	0	0	0	0	0	0	0.81038
TCGA-12-1096-01	GBM	0	0	0	0	0	0	0	0	0	0	0	0	0	0	0	0	0	0	0	0	0	0	0	0	0	0	0	0	0	0	0	0	1	1	0	0	1	1	0	0	0	0	0	0	0	0	0	0
TCGA-12-1097-01	GBM	0	0	0	0	0	0	0	0	0	0	0	0	0	0	0	0	0	0	0	0	0	0	0	0	0	0	0	0	0	0	0	0	0	0	0	0	0	0	0	0	0	0	0	0	0	0	0	0
TCGA-12-1098-01	GBM	0	0	0	0	0	0	0	0	0	0	0	0	0	0	0	0	0	0	0	0	0	0	0	0.0974191	0	0	0	0	0	0	0	0	0.0829501	0	0	0	0.535302	0	0	0	0	0	1	1	0	0	0.613734	0
TCGA-12-1099-01	GBM	0	0	0	0	0	0	0	0	0	0	0	0	0	0	0	0.913732	1	1	0	0	1	1	0	0	0	0	0	0	0	0	0	0	0	0	0	0	0	0	0	0	0	0.238582	0.761416	0	0	0	1	1
TCGA-12-1598-01	GBM	1	1	0	0	1	1	0	0	0	0	0	0	0	0	0	0	0	0	0	0	0	0.188493	0	0	0	0	0	0	0	0	0	0	0	0	0	0	0	0	0	0	1	1	0	0	0.157468	0.141358	0	0
TCGA-12-1599-01	GBM	0	0	0	0	0	0	0	0	0	0	0	0	0	0	0	0	0	0	0	0	0	0	0	0	0	0	0	0	0	0	0	0	0	0	0	0	0	0	0	0	0	0	0	0	0	0	0	0
TCGA-12-1600-01	GBM	0	0	0	0	0	0	0	0	0	0	0	0	0	0	0	0	0	0	0	0	0	0	0	0	0	0	0	0	0	0	0	0	0	0	0	0	0	0	0	0	0	0	0	0	0	0	0	0
TCGA-12-1602-01	GBM	0	0	0	0	0	0	0	0	0	0	0	0	0	0	0	0	1	1	0	0	1	1	0	0	0	0	0	0	0	0	0	0	1	1	0	0	1	1	0	0	0	0	1	1	0	0	1	1
TCGA-12-3644-01	GBM	0	0	0	0	0	0	0	0	0	0	0	0	0	0	0	0	1	1	0	0	1	1	0	0	0	0	1	1	0	0	1	1	0	0	0	0	0	0	0	0	0	0	0	0	0	0	0	0
TCGA-12-3646-01	GBM	0.980789	0	0	0	0.104757	0	0	0	0	0	0	0	0	0	0	0	1	1	0	0	1	1	0	0	0	0	1	1	0	0	1	1	1	1	0	0	1	1	0	0	0	0	0	0	0	0	0	0
TCGA-12-3648-01	GBM	0	0	0	0	0	0	0	0	0	0	0	0	0	0	0	0	0	0	0	0	0	0	0	0	0	0	0	0	0	0	0	0	0	0	0	0	0	0	0	0	0	0	0	0	0	0	0	0
TCGA-12-3649-01	GBM	0	0	0	0	0	0	0	0	0	0	0	0	0	0	0	0	0	0	0	0	0	0	0	0	0	0	0	0	0	0	0	0	0	0	0	0	0	0	0	0	0	0	0	0	0	0	0	0
TCGA-12-3650-01	GBM	0	0	0	0	0	0	0	0	0	0	0	0	0	0	0	0	0	0	0	0	0	0	0	0	0	0	0	0	0	0	0	0	0	0	0	0	0	0	0	0	0	0	0	0	0	0	0	0
TCGA-12-3651-01	GBM	0	0	0	0	0	0	0	0	0	0	0	0	0	0	0	0	0	0	0	0	0	0	0.359754	0	0	0	0	0	0	0	0	0	0	0	0	0	0	0	0	0	0	0	0	0	0	0	0	0
TCGA-12-3652-01	GBM	0	0	0	0	0	0	0	0	0	0	0	0	0	0	0	0	0	0	0	0	0	0	0	0	0	0	0	0	0	0	0	0	0	0	0	0.849679	0	0	0	0	0	0	0	0	0	0	0	0
TCGA-12-3653-01	GBM	0.990641	1	0	0	1	1	0	0	1	1	0	0	1	1	0	0	0	0	1	1	0	0	2.8e-05	0	0	0	0	0	0	0	0	0	0	0	0	0	0	0	0	0.0404425	1	1	0	0	0.235821	0	0	0.764101
TCGA-12-5295-01	GBM	0	0.326296	0	0	0	6.51e-05	0	0	0	0	0	0	0	0	0	0	0	0	0	0.572376	0	0	0	0	0	0	0	0	0	0	0	0	0	0	0	0	0	0	0	0	0	0	0	0	0	0	0	0
TCGA-12-5299-01	GBM	0	0	0	0	0	0	0	0	0	0	0	0	0	0	0	0	0	0	0	0	0	0	0	0	0	0	0	0	0	0	0	0	0	0	0	0	0	0	0	0	0	0	0	0	0	0	0	0.948917
TCGA-12-5301-01	GBM	0	0	0	0	0	0	0	0	0	0	0	0	0	0	0	0	0	0	0	0	0	0	0	0	0	0	0	0	0	0	0	0	0	0	0	0	0	0	0	0	0	0	0	0	0	0	0	0
TCGA-13-0714-01	OV	0	0	0	0	0	0	0	0.386472	0	0	0	0.181508	0	0	0	0	0	0.10698	0	0	0	0.355024	0	0	0	0	0	0	0	0	0	0.0627779	0	0	0	0.550358	0	0	0	0	0	0.305006	0	0	0	0	0	0.332348
TCGA-13-0717-01	OV	0.599078	0	0	0	1	1	0	0	0	0	0	0	0	0	0	0.432963	0.382109	0	0	0	0.178821	0.285466	0	0	0	0.392913	0.607073	0	0	0	1	1	0	0	0.288729	0.303556	0	0	1	1	1	1	0	0	0.000760361	0	0	0.982732
TCGA-13-0720-01	OV	1	1	0	0	0.227497	0	0	0.401857	0	0.426443	0	0	0	0	0	0.282195	0	0.100296	0	0	0	0.778488	0	0	1	1	0	0	0.173281	0	0	0.826691	1	1	0	0	0.11241	0.278269	0	0	0.197113	0	0	0.802861	0.35814	0	0	0.129912
TCGA-13-0723-01	OV	1	1	0	0	1	1	0	0	0	0	0.27274	0	0.725512	0	0	0.274461	0	0	0	0	0	0.968856	0	0	0	0	0	0	0	0	0	0	1	1	0	0	0.00143485	0	0	0	0.075204	0	0	0	1	1	0	0
TCGA-13-0724-01	OV	1	1	0	0	1	1	0	0	1	1	0	0	0.248744	0	0	0	0.482333	0	0	0.517628	1	1	0	0	0	0	0	0	0	0	0	0.945401	0	0	1	1	0.00980881	0	0	0.990166	1	1	0	0	1	1	0	0
TCGA-13-0725-01	OV	0	0.884347	0	0	0	0	0	0	0	0.814347	0	0	0	0	0	0.975686	0	0.0917891	0	0	0	0.460766	0	0	0	0	0	0.836659	0	0	0	0.763536	0	0.966186	0	0	0	0	0	0	0	0	0	0.188427	0	0	0	0.210371
TCGA-13-0726-01	OV	0.736894	0	0	0.0772404	1	1	0	0	0	0	0	0	0	0	0	0	0	0	0.329618	0	0	0.281242	0	0	0	0.533443	0	0	0	0	0	0	0	0	0	0	0	0	0	0	0	0	0.433093	0	0	0	1	1
TCGA-13-0727-01	OV	0	0	0	0	1	1	0	0	0	0	0	0	0	0	0	0	0	0	0	0	1	1	0	0	0	0	1	1	0	0	0.985539	0	1	1	0	0	0	0	0	0	0	0	0	0	0	0	0	0
TCGA-13-0730-01	OV	0	0	0	0	1	1	0	0	0	0.562552	0	0	0	0.466043	0	0	0.00635757	0	0	0	1	1	0	0	0.23824	0	0	0	0	0	1	1	1	1	0	0	0	0	1	1	0	0	1	1	0	0	2.76e-08	0
TCGA-13-0751-01	OV	0	0.198278	0	0	0	0.999945	0	0	0	0	0	0.281558	0	0	0	0.349853	0	0	0	0.0758579	0	0.629689	0	0	0	0	1	1	0	0	1	1	1	1	0	0	0.000192044	0	0	0	0	0	0.0748033	0	0	0	1	1
TCGA-13-0755-01	OV	0	0	0	0.204705	0	0.232381	0	0	0	0	0	0	0	0	0	0	0	0	0	0	0	0.346678	0	0	0	0	0	0.959006	0	0	0	0	0	0	0	0	0	0.699401	0	0	0	0	0	0	0	0	0	0.716235
TCGA-13-0757-01	OV	0.226287	0	0	0	1	1	0	0	1	1	0	0	0.699591	0	0	0	0	0	0	0.999996	1	1	0	0	0	0	1	1	0	0	1	1	1	1	0	0	0	0	0.282971	0	0	0.3517	0	0	0	0	0	0.999978
TCGA-13-0758-01	OV	1	1	0	0	1	1	0	0	0	0	0	0	0	0	0	0.280983	1	1	0	0	1	1	0	0	1	1	0	0	1	1	0	0	1	1	0	0	1	1	0	0	0.565992	0	0	0	0.243671	0	0	0.268348
TCGA-13-0760-01	OV	1	1	0	0	1	1	0	0	0	0	0.515238	0	0	0	0.136154	0.235087	1	1	0	0	0.984518	0	0	0.139579	0	0	1	1	0	0.0262655	0.973733	0	1	1	0	0	0	0.0203924	0.979607	0	1	1	0	0	0.898912	0	0	0.101027
TCGA-13-0761-01	OV	0	0	0	0.820013	0	0	0	0	0	0	0	0	0	0	0	0.25937	0	0.413426	0	0	0	0.67375	0	0	0	0	0	0.162757	0	0	0	0.118382	0	0	0	0.470618	0	0	0.756125	0	0	0	0	0.019093	0	0	0	0.336067
TCGA-13-0762-01	OV	0.0224061	0	0	0	1	1	0	0	0	0	0	0	0	0	0	0	1	1	0	0	0.41048	0	0	0	0	0	1	1	0	0	1	1	0	0	0	0	0	0	0	0	1	1	0	0	0.0744732	0	0	0.920567
TCGA-13-0764-01	OV	0.0201037	0	0	0.256551	0	0	0	0	0	0	0	0	0.0520421	0	0	0	0.0258668	0	0	0.604546	1	1	0	0	0.143596	0	0	0.856361	0.291031	0	0	0	0	0	0	0	0	0	0	0.999935	1	1	0	0	0.207925	0	0	0.792072
TCGA-13-0766-01	OV	0	0	0	0	0	0	0	0	0	0	0	0	0	0.125542	0	0	0	0	0	0	0	0	0	0	0	0	0	0	0	0	0	0.719647	0	0.958276	0	0	0	0	0.493675	0	0	0	0	0.208956	0	0	0	0.761234
TCGA-13-0768-01	OV	0	0.353075	0	0	0	0	0	0	0	0	0	0	0	0	0	0	0.0127894	0	0	0	1	1	0	0	0	0	1	1	0	0	1	1	0.181422	0.0115662	0	0	1	1	0	0	0	0	1	1	0	0	0.793852	0
TCGA-13-0791-01	OV	0	0.0418744	0	0	0.0253848	0	0	0	0.320791	0	0	0	0	0	0	0	0	0	0	0	0	0.500804	0	0	0	0	0	0	0	0	0	0	1	1	0	0	0.0227949	0	0	0.787967	0	0	0	0	0	0	0	0
TCGA-13-0791-02	OV	5.66624e-05	0.780482	0	0	0.0254976	0	0	0	0.289477	0	0	0	0	0	0	0	0	0	1	1	0	0.359076	0.499062	0	0	0	0	0	0	0	0	0.810039	0	0.231252	0	0	0.0228817	0	0	0	1	1	0	0	1	1	0	0
TCGA-13-0792-01	OV	0	0.0654846	0	0	0	0.198261	0	0	0	0.206387	0.23376	0	0	0	0.894739	0	0.0903779	0	0	0.909516	0.984762	0	0	0	0.114318	0	0	0	0.177244	0	0	0.822754	1	1	0	0	0.0334621	0.180323	0	0	0.999952	0	0	0	0.393474	0	0	0.226201
TCGA-13-0793-01	OV	1	1	0	0	1	1	0	0	1	1	0	0	0.968568	0	0	0	1	1	0	0	0.927351	0	0	0.0726265	0	0	1	1	0	0	1	1	1	1	0	0	0.0505488	0	0	0.949437	0.78934	0	0	0	0.0196616	0	0	0.980324
TCGA-13-0794-01	OV	0	0	0	0	0.0517279	0	0	0	0	0	0	0	0	0	0	0	0	0	0.43164	0	0	0	0	0.0172624	0	0	0	0	0	0	0	0.231658	1	1	0	0	0.00853919	0	0	0.953487	1	1	0	0	0.0370373	0	0	0
TCGA-13-0795-01	OV	0.0277841	0	0	0	1	1	0	0	0	0	0	0	0	0	0	0	0.135164	0	0	0.506717	1	1	0	0	0	0	1	1	0	0	1	1	0	0	0.878587	0	0	0	0.431437	0	1	1	0	0	1	1	0	0
TCGA-13-0797-01	OV	0	0.478731	0	0	0.080218	0	0	0	0	0	0	0	0	0	0	0	0	0	0	0	0	0	0	0	0	0	0	0	0	0	0	0.841331	0	0	0	0	0	0	0	0	0	0	0.482329	0	0	0	1	1
TCGA-13-0799-01	OV	0	0	0	0	1	1	0	0	0	0	0	0	0	0	0	0.193356	0	0	0	0	0	0.0364133	0	0	0	0.330502	0.561442	0	0	0	0	0	0	0	0	0	0	0	0	0	0	0	0	0	0	0	0	0.737171
TCGA-13-0800-01	OV	0	0	0	0	0.999965	0	0	0	1	1	0	0	0.0408279	0	0	0	0	0	0	0	0	0.999911	0	0	0	0.264053	0	0	0	0	0	0	0	0	1	1	0	0	1	1	1	1	0	0	0.417383	0	0	0.582558
TCGA-13-0801-01	OV	0.137955	0.367434	0	0	1	1	0	0	1	1	0	0	0.077354	0	0	0.172942	0.974574	0	0	0	1	1	0	0	0	0	1	1	0	0	1	1	1	1	0	0	0.0351209	0	0	0.964809	0.139836	0	0	0.0269934	0.0228002	0	0	0
TCGA-13-0802-01	OV	0	0	0	0.281464	1	1	0	0	1	1	0	0	0.0331949	0	0	0	0.0286272	0	0	0.708678	0	0.986813	0	0	1	1	0	0	0.195208	0	0	0.669527	0	0.309532	0	0	0	0	0	0	0.477345	0	0	0	0.0249751	0	0	0.974707
TCGA-13-0803-01	OV	0.888442	0	0	0.101451	0.058943	0	0	0	0.51975	0	0	0	0.717954	0	0	0.0653745	0	0	0	0	1	1	0	0	0	0.00975234	0	0	0	0	0	0.252347	0	0.810432	0	0	0	0	1	1	0	0.58338	0.41655	0	0	0	1	1
TCGA-13-0804-01	OV	1	1	0	0	0.93788	0	0	0	0	0	0	0	0	0	0	0	0	0.700187	0	0	0	0.889773	0	0	0	0	1	1	0	0	0.99999	0	1	1	0	0	1	1	0	0	0	0	0	0	0	0	0	0
TCGA-13-0805-01	OV	0.820909	0	0	0.179063	1	1	0	0	1	1	0	0	1	1	0	0	1	1	0	0	0.87225	0	0	0.127715	0	0	1	1	0	0	1	1	0	0	1	1	0	0.41487	0.415542	0	1	1	0	0	1	1	0	0
TCGA-13-0807-01	OV	0	0	0	0	0.0639551	0	0	0	0	0	0	0	0	0	0	0	0	0	0	0	0	0.608851	0	0	0	0	0	0	0	0	0	0	0	0	0	0	0	0.777002	0	0	0	0	0	0	0	0	0	0
TCGA-13-0883-01	OV	0	0	0	0	0	0.164811	0	0	0.375589	0	0	0	1	1	0	0	0	0	0	0	0	0	0	0	1	1	0	0	0.159468	0	0	0.686934	1	1	0	0	1	1	0	0	0	0.587016	0	0	0	0	0	0.759609
TCGA-13-0884-01	OV	0	0	0	0	0	0	0	0	0.485822	0	0	0	1	1	0	0	0	0	0	0	0	0.992413	0	0	0	0	0	0	0	0	0	0.762027	0	0.538824	0.461149	0	0	0	1	1	0	0	1	1	0	0	1	1
TCGA-13-0885-01	OV	0.675408	0	0	0.0617155	0.190142	0	0	0	2.97e-05	0	0	0	0.850957	0	0	0	0	0	0	0	0	0.466103	0	0	0	0	1	1	0	0	1	1	0.74622	0	0	0.253457	0	0.0853578	0.914627	0	1	1	0	0	0.969124	0	0	0
TCGA-13-0886-01	OV	0	0	0	0.216836	0	0.981741	0	0	0	0	0	0.284008	0	0.113595	0	0	0	0	0	0.134322	0	0	0	0	0	0	0	0	0	0	0	0	0	0.906075	0	0	0	0.0644171	0	0	0	0.701545	0	0	0	0	0	0.0659882
TCGA-13-0887-01	OV	0.786143	0	0	0.213821	0.999987	0	0	0	0.0357674	0.19846	0	0	1	1	0	0	0	0	0	0.651275	0	0.931237	0	0	0	0.581738	0	0	0	0.0181082	0	0	1	1	0	0	0.0288387	0	0	0	0	0	0	0.19253	0	0	0	0.674563
TCGA-13-0888-01	OV	0	0.017281	0	0	0	0	0	0	1	1	0	0	1	1	0	0	0.0149927	0	0	0.60691	1	1	0	0	0.157141	0.044954	0	0	0.140109	0	0	0	0	0	1	1	0	0	0.471924	0	1	1	0	0	0	0	0	0
TCGA-13-0889-01	OV	0.0885152	0	0	0.064859	1	1	0	0	0	0	0	0.127131	0	0	0	0	0.383111	0.12467	0	0	1	1	0	0	0	0	1	1	0	0.346737	0.653232	0	1	1	0	0	0	0	0	0	0	0	0	0	0	0	0	0.542903
TCGA-13-0890-01	OV	0.320584	0	0	0.239089	1	1	0	0	1	1	0	0	3.36e-05	0	0	0.999964	0	0	1	1	0.909689	0	0	0.0903024	0	0	1	1	0	0	1	1	1	1	0	0	0.0131728	0.109306	0	0	0	0.700561	0.299292	0	0	0	1	1
TCGA-13-0891-01	OV	1	1	0	0	1	1	0	0	0	0	1	1	0	0	1	1	1	1	0	0	1	1	0	0	1	1	0	0	1	1	0	0	1	1	0	0	0.0122534	0	0	0.987726	0	0.571453	0	0	0	0	0	0.0165243
TCGA-13-0893-01	OV	0	0	0	0.162638	0	0	0	0	0	0.618574	0	0	0	0	0	0.190903	0	0	0	0	0	0.637844	0	0	0	0.529729	0	0	0	0	0	0	0	0.437915	0.304927	0	0	0	0.295227	0.256765	0	0	0	0	0	0	0	0
TCGA-13-0897-01	OV	0	0	0	0.110092	0.324582	0	0	0	0	0.786476	0	0	0	0	0	0	0	0	0	0	0	0.978517	0	0	0	0	0	0.84146	0	0	0	0	0	0	0	0	0	0.325322	0	0	0	0	0	0.523233	0	0	0	0.791623
TCGA-13-0899-01	OV	0.203254	0	0	0	1	1	0	0	1	1	0	0	0.36279	0	0	0	0.000348927	0	0	0	1	1	0	0	0	0	1	1	0	0	1	1	1	1	0	0	6.52e-05	0	0	0.936737	0	0	0	0.0397132	0	0	0	0.852611
TCGA-13-0900-01	OV	0.98741	0	0	0.519299	0.811688	0	0	0	1	1	0	0	0.232281	0	0	0	1	1	0	0	1	1	0	0	0.00854544	0	0	0.991392	1	1	0	0	1	1	0	0	0.0157435	0.43218	0	0	0	0	0.0543665	0.0461895	0	0	1	1
TCGA-13-0901-01	OV	0.0157908	0	0	0	0.999987	0	0	0	1	1	0	0	0.18736	0	0	0	0.0260147	0	0	0	1	1	0	0	0	0.0162237	0	0	0	0	0	0	1	1	0	0	0	0	0	0.988812	1	1	0	0	0.099069	0	0	0
TCGA-13-0903-01	OV	0	0	0	0.23695	0	0	0	0	0	0	0	0	0	0	0	0	1	1	0	0	0.27817	0.0287093	0	0	0.203678	0	0	0.796319	0.91518	0	0	0.0848066	0	0.04299	0	0	0	0.0932625	0	0	0	0	0	0	0	0.152039	0	0
TCGA-13-0904-01	OV	0.207292	1	0	0	0.994597	0	0	0	0	0	0	0.970481	0.85136	0	0	0.15364	0	0	0	0.134713	0.76509	0	0	0	0.0478733	0	0	0.951273	0.344245	0	0	0.644715	1	1	0	0	0	0	1	1	0	0.105393	0	0	0	0.128873	0	0
TCGA-13-0905-01	OV	0	0	0	0.701474	0.697627	0	0	0	0	0	0	0	0	0	0	0.067413	0	0	0	0.92999	0	0	0	0.071645	0	0.0294371	0	0	0	0	0	0.763683	0	0.921363	0	0	0	0	0	0	0	0	0	0.308869	0	0	0	0.357172
TCGA-13-0906-01	OV	0	0.769479	0	0	0	0.327668	0	0	0	0.750096	0	0	0	0	0	0	0.398881	0	0	0.601116	1	1	0	0	1	1	0	0	0.265949	0	0	0.842483	1	1	0	0	0	0	1	1	0	0	0	0.018948	0	0	0	0.614136
TCGA-13-0908-01	OV	0	0	0	0.233417	0	0	0	0	0	0	0	0	0	0	0	0.232707	0	0	0	0	0	0	0	0	0	0	0	0	0	0	0	0.200567	0	0	0	0	0	0	0	0	0	0	0	0.31298	0	0	0	0.37692
TCGA-13-0910-01	OV	1	1	0	0	1	1	0	0	1	1	0	0	1	1	0	0	1	1	0	0	1	1	0	0	0	0	1	1	0	0	1	1	1	1	0	0	0.999761	0	0	0.000237792	0	0.643617	0.340295	0	0	0	1	1
TCGA-13-0911-01	OV	1	1	0	0	1	1	0	0	0	0	0	0	0	0	0	0	1	1	0	0	0	0.999985	0	0	0	0	1	1	0	0	1	1	1	1	0	0	0	0.0932625	0.906222	0	0	0	0.016526	0	0	0	1	1
TCGA-13-0912-01	OV	0	0	0	0	0	0.133229	0	0	0	0	0	0	0	0	0	0	0	0	0	0	0	0	0	0	0	0	1	1	0	0	1	1	0	0.411185	0	0	0	0	0	0	0	0	0	0	0	0	0	0
TCGA-13-0913-01	OV	0.785031	0	0	0.214925	1	1	0	0	1	1	0	0	1	1	0	0	1	1	0	0	1	1	0	0	1	1	0	0	0.0476909	0	0	0.952274	1	1	0	0	0.977902	0	0	0.0220934	0.433111	0.0623153	0	0	0.528591	0	0	0.471409
TCGA-13-0913-02	OV	0.748901	0	0	0	1	1	0	0	0	0	0	0	0	0.639195	0	0	1	1	0	0	1	1	0	0	1	1	0	0	0.00238577	0	0	0.997585	1	1	0	0	0.977907	0	0	0.0220811	1	1	0	0	0.528591	0	0	0.471388
TCGA-13-0916-01	OV	0.0817288	0	0	0.91823	1	1	0	0	0.000719182	0	0	0.99923	0.830123	0	0	0.169855	0.965514	0	0	0.164891	1	1	0	0	1	1	0	0	0.211318	0	0	0.788664	1	1	0	0	0.0292862	0.0101521	0	0	1	1	0	0	0.708876	0	0	0.291102
TCGA-13-0919-01	OV	0.351351	0.203306	0	0	0.887715	0	0	0.11228	1	1	0	0	1	1	0	0	0	0.0283928	0	0	0	0.964902	0	0	0	0	0	0.181713	0	0	0	0	0.318129	0	0	0	0.0908117	0.201835	0	0	0	0	0	0	0	0	0	0.736915
TCGA-13-0920-01	OV	2.9043e-05	0	0	0	1	1	0	0	0	0.848043	0	0	0	0	0	0.0130347	0.0528569	0	0	0	0.838979	0	0	0	0	0.156519	0	0	0	0	0	0.832159	1	1	0	0	0.019475	0.00642089	0	0	1	1	0	0	0	0.999978	0	0
TCGA-13-0921-01	OV	0	0	0	0	0	0.999938	0	0	0	0.784517	0	0	0	0.0109973	0	0	0.271708	0	0	0.51695	1	1	0	0	1	1	0	0	0.0278213	0	0	0	0	0	0.00168862	0	0	0.836263	0.217385	0	0	0	1	1	0	0	1	1
TCGA-13-0923-01	OV	2.9043e-05	0	0	0	1	1	0	0	0.185836	0	0	0.0854995	0.0611928	0	0	0.058298	0	0	0	0.859288	0	0	0	0.239196	0	0	0	0	0	0	0	0.997401	0	0.146042	0	0	0	0.224237	0.338069	0	0	0.727475	0.0570646	0	0	0	0.821645	0
TCGA-13-0924-01	OV	0.762579	0	0	0.237418	1	1	0	0	1	1	0	0	0.124577	0.04407	0	0	0.623212	0	0	0.376773	1	1	0	0	0	0	0	0.79773	0	0.430877	0	0	0	0.368358	0	0	0	0.332361	0.667635	0	1	1	0	0	0.753914	0	0	0.246082
TCGA-13-1403-01	OV	0	0	0	0	0	0	0	0	0	0.79349	0	0	0	0	0	0	0	0	0.0016933	0	1	1	0	0	0.0706774	0	0	0.92931	0.0947913	0	0	0.905182	0	0.785589	0	0	0	0	0	0	0	0	0	0	0	0	0	0
TCGA-13-1404-01	OV	0.894806	0	0	0.156876	0.885123	0	0	0	1	1	0	0	0.802542	0	0	0.197423	0	0.776231	0	0	0	0.278108	0	0	1	1	0	0	0.0221695	0	0	0.805413	0	0.963175	0	0	0	0.432886	0.567111	0	0	0.938027	0	0	0	0	0	0.763735
TCGA-13-1405-01	OV	1	1	0	0	0.999987	0	0	0	1	1	0	0	0.843943	0	0	0.0915933	1	1	0	0	1	1	0	0	1	1	0	0	1	1	0	0	1	1	0	0	0	0	1	1	0	0	1	1	0	0	1	1
TCGA-13-1407-01	OV	1	1	0	0	0.0420649	0	0	0	1	1	0	0	1	1	0	0	0.0251762	0	0	0	1	1	0	0	0	0	1	1	0	0	1	1	1	1	0	0	0	0	1	1	1	1	0	0	0.0160772	0	0	0.950825
TCGA-13-1408-01	OV	0.00018118	0.203214	0	0	0.999987	0	0	0	0	0	0	0.284445	0	0.960992	0	0	0	0	0.0582321	0.278488	0	0.357096	0.415707	0	0	0	1	1	0	0	1	1	0	0.810809	0	0	0.0169572	0	0	0.983042	0.844915	0	0	0	0.212998	0.130386	0	0
TCGA-13-1409-01	OV	0	0	1	1	0.999987	0	0	0	1	1	0	0	1	1	0	0	0.069336	0	0	0.930621	1	1	0	0	0	0	1	1	0	0	1	1	1	1	0	0	1	1	0	0	1	1	0	0	0.397056	0	0	0.354923
TCGA-13-1410-01	OV	0.79358	0	0	0.206347	0.999987	0	0	0	0.20127	0	0	0	1	1	0	0	0.831412	0	0	0.168566	1	1	0	0	0	0	1	1	0	0	1	1	0	0	1	1	0	0	0.261629	0.151077	0	0	0.225409	0.102791	0	0	1	1
TCGA-13-1411-01	OV	0.281917	0	0	0	0.117722	0	0	0	0	0	0	0.160355	0	0	0	0.0663386	0.00137117	0	0	0.998621	1	1	0	0	0	0	0	0.795086	0	0	0	0	0	0.92209	0.0382438	0	0	0	0.983252	0	0	0.999675	0.000302569	0	0	0	1	1
TCGA-13-1412-01	OV	0	0	0	0	0	0	0	0	0	0.747623	0	0	0	0	0	0.478926	0	0	0	0	0	0.641972	0	0	0	0	0	0	0	0	0	0.112308	0	0	0	0	0	0	0	0.948611	0	0.494205	0	0	0	0	0	0.133267
TCGA-13-1477-01	OV	0.0114423	0	0	0.963918	0.999931	0	0	0	0	0	0	0	0	0	0	0	0	0	0	0	0	0	0	0	0	0	0	0	0	0	0	0	0	0	0	0	0	0	0	0	0	0.530856	0	0	0	0	0	0
TCGA-13-1481-01	OV	0.0491987	0	0	0.232634	1	1	0	0	0	0.3622	0	0	0	0	0	0.0522309	0	0	0	0.227055	0	0.745569	0	0	0	0.570585	0	0	0	0	0	0.947253	0	0.923764	0	0	0	0	0	0	0	0.88764	0	0	0	0	0	0.574901
TCGA-13-1482-01	OV	0	0	0	0.262631	0	0	0	0	0	0	0	0	0	0.967825	0	0	0	0	0	0	0	0	0	0.013711	0	0.00427518	0	0	0	0	0	0	0	0	0	0	0	0	0.369526	0.0669956	0	0	0	0	0	0	0	0.777749
TCGA-13-1483-01	OV	0	0.255607	0	0	0	0	0	0	0	0	0	0	0	0	0	0	0	0	0	0	0	0	0	0.0049059	0.520518	0	0	0	0.265659	0	0	0.12506	0	0	0	0	0	0.233672	0	0	1	1	0	0	0.0170266	0	0	0.954258
TCGA-13-1484-01	OV	0	0	0	0.999971	1	1	0	0	0	0	1	1	0	0	1	1	0.270841	0.0277343	0	0	1	1	0	0	0	0	1	1	0	0	1	1	1	1	0	0	0	0	1	1	0	0.999995	3.42e-06	0	0	0	1	1
TCGA-13-1485-01	OV	0	0	0	0	1	1	0	0	0	0	0	0	0	0	0	0	0	0	0	0	0	0	0	0	0	0	0	0	0	0	0	0	0	0	0	0	0	0	0	0	0	0	0	0	0	0	0	0
TCGA-13-1487-01	OV	0.0144405	0	0	0.340637	1	1	0	0	0	0	0	0	0	0	0	0.0130584	0	0	0	0.99923	0	0.787684	0	0	0	0	1	1	0	0	1	1	0	0.807126	0	0	0	0.31997	0	0	1	1	0	0	1	1	0	0
TCGA-13-1488-01	OV	0	0	0.451773	0	0	0.671256	0.000291665	0	0	0	0	0.123458	0	0	0	0.202495	0	0	0	0	0	0.522671	0	0	0	0	0	0	0	0	0	0.778769	1	1	0	0	0.0308683	0	0	0	1	1	0	0	0.593569	0	0	0.406413
TCGA-13-1489-01	OV	0.239782	0	0	0.760159	1	1	0	0	0.930794	0	0	0.0691727	1	1	0	0	0.468503	0	0	0.531305	1	1	0	0	0	0	1	1	0	0	1	1	0	0.99961	0	0	0	0.202029	0	0	0.815806	0	0	0.184116	0.507595	0	0	0.227244
TCGA-13-1489-02	OV	0	0	0	0	0.15695	0.101614	0	0	0	0	0	0.0691727	0	0.175619	0	0	0.468503	0	0	0.531305	1	1	0	0	0	0	1	1	0	0	1	1	1	1	0	0	0	0.202029	0	0	0	0	0	0.184116	0	0	0	0.442908
TCGA-13-1491-01	OV	0.757401	0	0	0.242562	1	1	0	0	1	1	0	0	1	1	0	0	1	1	0	0	1	1	0	0	0	0	1	1	0	0	1	1	1	1	0	0	0	0	1	1	0	0	1	1	0	0	1	1
TCGA-13-1492-01	OV	1	1	0	0	1	1	0	0	1	1	0	0	1	1	0	0	0.783176	0	0	0.213873	0	0	0.656348	0	0	0	1	1	0	0	1	1	1	1	0	0	0	0	1	1	0.895981	0	0	0	1	1	0	0
TCGA-13-1494-01	OV	0.749893	0	0	0.250075	1	1	0	0	1	1	0	0	0.00479328	0	0	0.995169	1	1	0	0	1	1	0	0	0.07291	0.267485	0	0	0.189447	0.0777644	0	0	1	1	0	0	0.20277	0	0	0.797206	1	1	0	0	0.314821	0.0129376	0	0
TCGA-13-1495-01	OV	0	0.773852	0	0	1	1	0	0	0	0.0564752	0	0	0	0.0144527	0	0	0.0259262	0	0	0	0	0.937481	0	0	0.0943804	0	0	0.801857	0.268321	0	0	0.724931	0.211318	0.00898329	0	0	0	0.0568971	0	0	0	0	1	1	0	0	1	1
TCGA-13-1496-01	OV	0	0.902474	0	0	0.0761161	0	0	0	0	0	0	0	0	0	0	0	0	0	0	0	1	1	0	0	0	0.913085	0	0	0	0	0	0	0	0.991602	0.00829995	0	0.0665899	0	0	0.997766	1	1	0	0	1	1	0	0
TCGA-13-1497-01	OV	0.697178	0	0	0.31301	0.184037	0.223588	0	0	0	0.829134	0	0	0	0	0	0.254559	0	0	0.227498	0	0	0.545808	0.113026	0	0	0.0171783	0	0	0	0	0	0.870498	0	0.951781	0.0479764	0	0	0	0.910834	0	0	0.740748	0	0	0	0	0	0.298648
TCGA-13-1498-01	OV	0.027059	0.0437892	0	0	0.16759	0.239097	0	0	0	0	0	0.000927256	0	0.320392	0	0	0	0	0	0	0	0.575002	0	0	0	0	0	0	0	0	0	0.0386463	0	0	0	0	0	0.354078	0	0	0	0	0	0	0	0	0	0
TCGA-13-1499-01	OV	0.18459	0	0	0	0.591871	0	0	0.408125	0	0	0	0.00222493	0	0	0	0	0	0	1	1	0	0	0.168575	0	0	0.822559	0	0	0	0	0	0.825774	0	0	0	0	0	0	0	0.919711	1	1	0	0	0.748016	0	0	0.251941
TCGA-13-1500-01	OV	0	0	0	0	0	0	0	0	0	0.448854	0	0	0	0	0	0	0	0	0	0	0	0.770543	0	0	0	0	1	1	0	0	1	1	0	0	0	0	0	0	0	0	0	0	0	0	0	0	0	0
TCGA-13-1501-01	OV	0	0	0	0	0	0	0	0	0.348941	0	0	0.651006	0.835669	0	0	0.164305	0	0	0	0	0	0	0	0	0	0	0	0	0	0	0	0	0	0.834816	0	0	0	0.200175	0.57317	0	0	0.0188078	0	0	0	0	0	0.775942
TCGA-13-1504-01	OV	0.0462019	0	0	0	1	1	0	0	1	1	0	0	0.110144	0	0	0	0.00730015	0	0	0	1	1	0	0	0	0	0	0.819583	0.00332214	0	0	0.996659	1	1	0	0	0.0389171	0	0	0.961079	0.00185848	0	0	0	1	1	0	0
TCGA-13-1505-01	OV	0	0	0	0	0.55858	0	0	0	1	1	0	0	0.820077	0	0	0	0	0.916845	0	0	0.270345	0.314514	0	0	1	1	0	0	0.0591762	0	0	0.891427	1	1	0	0	0	0	1	1	0	0	0	0	0	0	0	0
TCGA-13-1506-01	OV	0.897462	0	0	0	0.811451	0	0	0	0	0.910257	0	0	0	0	0	0.144875	0.0430537	0	0	0	1	1	0	0	0	0	0	0.0355214	0	0	0	0	1	1	0	0	0	0	0	0	0	0	0.0068365	0.316113	0	0	1	1
TCGA-13-1507-01	OV	0	0	0	0	0	0	0	0	0	0.0743203	0	0	0	0	0	0.00158654	0.0165273	0	0	0	1	1	0	0	0	0	0	0	0	0	0	0	0	0.999563	0	0	0	0	0	0	0	0	0	0	0	0	0	0.0187404
TCGA-13-1509-01	OV	0	0	0.0629942	0.25724	0.23145	0.144091	0	0	0.323201	0	0	0	1	1	0	0	0.321652	0.0814782	0	0	1	1	0	0	0.100918	0	0	0.890116	0.176992	0	0	0.962896	1	1	0	0	0	0.305728	0.693848	0	0	0	0	0.303588	0	0	0	0
TCGA-13-1510-01	OV	0	0	0	0.233354	0.0262548	0	0	0	0	0	0	0.197066	0	0	0	0	0	0	0	0	0	0	0	0	0.161281	0	0	0.250929	0	0.386742	0	0	0	0.0634579	0	0	0	0	0	0.999935	1	1	0	0	0	0	0	0.271872
TCGA-13-1511-01	OV	0	0	0	0	0.0669782	0	0	0	0	0	0	0	0	0	0	0	0.0124621	0	0	0.700516	0	0.421392	0	0	0	0	0	0	0	0	0	0	0	0	0	0	0	0	0	0	0	0	0	0	0	0	0	0.224586
TCGA-13-1512-01	OV	0	0.999971	0	0	0.349133	0.167563	0	0	1	1	0	0	0.962095	0	0	0.037823	0	0	1	1	0	0.292321	0.707645	0	0	0.076119	0.923831	0	0.199392	0	0	0.8005	1	1	0	0	0	0	0.203611	0	0	0.446186	0.401263	0	0	0	1	1
TCGA-13-1817-01	OV	0.0340012	0	0	0.965945	1	1	0	0	1	1	0	0	1	1	0	0	0	0	1	1	0	0.999985	0	0	0	0	1	1	0	0	1	1	0	0	1	1	0	0	1	1	1	1	0	0	0.089497	0	0	0.910452
TCGA-13-1817-02	OV	1	1	0	0	1	1	0	0	1	1	0	0	1	1	0	0	0	8.16e-05	0.83925	0	1	1	0	0	0	0	1	1	0	0	1	1	1	1	0	0	1	1	0	0	0.810102	0	0	0.0124235	0.089497	0	0	0.910452
TCGA-13-1819-01	OV	0	0	0	0.0403762	0	0.995242	0	0	0	0	0	0	0	0.423767	0	0	0	0.0147397	0	0	0	0.82188	0	0	0	0	0	0	0	0	0	0.700096	0	0.827408	0	0	0	0	0	0.206789	0	0.978427	0	0	0	0	0	0.765509
TCGA-13-1819-02	OV	0	0	0	0.0403888	0	0.994002	0	0	0	0.580398	0	0	0	0.0372969	0	0	0	0.0147317	0	0	0	0.192152	0	0	0	0	0	0	0	0	0	0.7001	0	0.827696	0	0	0	0	0	0.206789	0	0.854095	0	0	0	0	0	0.765468
TCGA-13-2057-01	OV	0	0	0	0	1	1	0	0	1	1	0	0	1	1	0	0	0.0752546	0	0	0.807779	1	1	0	0	0	0	0	0.801987	0	0	0	0	0	0	0	0.915696	0	0	0	0	1	1	0	0	1	1	0	0
TCGA-13-2059-01	OV	0.732368	0.0306775	0	0	0.756216	0	0	0	1	1	0	0	0.174339	0.185822	0	0	0.116702	0	0	0	1	1	0	0	0	0	0	0.880682	0	0	0	0.97825	0	0	1	1	0	0.0383955	0.961521	0	0.0705249	0	0	0.249293	0.0430437	0.0633486	0	0
TCGA-13-2060-01	OV	0	0	0	0	0.062524	0	0	0	1	1	0	0	0.876565	0	0	0	0.00592286	0	0	0	1	1	0	0	0	0	0	0	0	0	0	0	0	0.449392	0.519713	0	0	0	1	1	1	1	0	0	0.00158402	0	0	0
TCGA-13-2061-01	OV	0.73837	0	0	0.261602	0.435621	0	0	0	0	0	0	0	0	0	0	0	0.283388	0	0	0	0.0220997	0	0	0	0	0	1	1	0	0	1	1	0	0	0	0	0	5.66e-06	0	0	0	0.723934	0	0	0	0	0	0.120202
TCGA-13-2065-01	OV	0.793158	0	0	0.20681	0.663319	0	0	0	0.0516822	0	0	0	0.000188345	0	0	0	0.0016933	0	0	0.681768	1	1	0	0	0	0	0	0	0	0	0	0	1	1	0	0	1	1	0	0	1	1	0	0	0.16903	0	0	0.0977514
TCGA-13-2071-01	OV	0	0.183773	0	0	0	0	0	0.00772436	0	0.600674	0	0	0	0	0	0	0	0.58117	0	0	0	0.836944	0	0	0	0.368134	0	0	0	0	0	0.126361	0	0	0	0	0	0	0	0.0108566	0	0.445136	0	0	0	0	0	0.978679
TCGA-13-A5FT-01	OV	0	0.999952	0	0	0	0	0	0	0	0.00198245	0	0	0	0	0	0	0	0	0	0	0	0	0	0.0113695	0	0	1	1	0	0	1	1	0	0.352229	0	0	0	0	0	0	0	0	0	0.076681	0	0	0	0.924928
TCGA-13-A5FU-01	OV	0.790452	0	0	0.209521	0.0452256	0	0	0	0	0.259242	0	0	0	0	0	0	0	0	0	0	0	0.317902	0	0	0	0.050228	0	0	0	0	0	0	0	0	0	0	0	0.064944	0	0	0	0	0	0.957072	0	0	0	0
TCGA-14-0736-01	GBM	0.946628	1	0	0	1	1	0	0	1	1	0	0	1	1	0	0	0	0.906138	0	0	0	0.303765	0	0	1	1	0	0	1	1	0	0	1	1	0	0	1	1	0	0	0	0	1	1	0	0	1	1
TCGA-14-0736-02	GBM	0	0	0	0	0	0	0	0	0	0	0	0	0	0	0	0	0	0	0	0	0	0	0	0	0	0	0	0	0	0	0	0	0	0	0	0	0	0	0	0	0	0	1	1	0	0	1	1
TCGA-14-0740-01	GBM	0	0	0	0	0	6.51e-05	0.999931	0	0	0.198228	0	0	1	1	0	0	0	0	0	0	0	0	0	0	1	1	0	0	0.0191522	0	0	0	0	0	0	0	0	0	0	0.413841	0	0	0	0	0	0	0	0
TCGA-14-0781-01	GBM	0	0	0	0	0	0	0	0	0	0	0	0	0	0	0	0	0	0	0	0	0	0	0	0	0	0	0	0	0	0	0	0	0	0	0	0	0	0	0	0	0	0	0	0	0	0	0	0
TCGA-14-0783-01	GBM	1	1	0	0	1	1	0	0	0	0	0	0	0	0	0	0	0	0	0	0	0	0.459291	0	0	0	0	0	0	0	0	0	0	0	0	0	0	0	0	0	0	0	0	0	0	0	0	0	0
TCGA-14-0786-01	GBM	0	0	0	0.0473871	0	0	0	0	0	0	0	0	0	0	0	0	0	0	0	0	0	0	0	0	0	0	0	0	0	0	0	0	0	0	0	0	0	0	0	0	0	0	0	0	0	0	0	0
TCGA-14-0787-01	GBM	0	0	0	0.0574221	0	0	0	0.000291665	0	0	0	0	0	0	0	0	0	0	0	0	0	0	0	0	0	0	0	0	0	0	0	0	0	0	0	0	0	0	0	0	0	0	0	0	0	0	0	0
TCGA-14-0789-01	GBM	0	0	0	0	0	0	0	0	0	0	0	0	0	0	0	0	0	0	0	0	0	0	0	0	0	0	0	0	0	0	0	0	0	0	0.00577122	0	0	0	0	0	0	0	0	0	0	0	0	0
TCGA-14-0790-01	GBM	0	0	0	0	0	0	0	0	0	0	0	0	0	0	0	0	0	0	0	0	0	0	0	0	0	0	0	0	0	0	0	0	0	0	0	0	0	0	0	0	0	0	0	0	0	0	0	0
TCGA-14-0812-01	GBM	0	0	0	0	0	0	0	0.0030215	0	0	0	0	0	0	0	0	0	0	0	0	0	0	1	1	0	0	0	0	0	0	0	0	0	0	0	0	0	0	0	0	0	0	0	0	0	0	0	0
TCGA-14-0813-01	GBM	0	0	0	0	0	0.683653	0	0	0	0	0	0	0	0	0	0	0	0	0	0	0	0.589528	0	0	0	0	0	0	0	0	0	0	0	0	0	0	0	0	0	0	0	0	0	0	0	0	0	0
TCGA-14-0817-01	GBM	1	1	0	0	1	1	0	0	0	0	0	0	0	0	0	0	0	0	0	0	0	0	0	0	0	0	0	0	0	0	0	0	0	0	0	0	0	0	0	0	0	0	1	1	0	0	1	1
TCGA-14-0862-01	GBM	0.786467	0	0	0	1	1	0	0	1	1	0	0	1	1	0	0	0	0	1	1	1	1	0	0	1	1	0	0	0.811293	0	0	0.188678	1	1	0	0	1	1	0	0	1	1	0	0	0.855725	0	0	0.144275
TCGA-14-0865-01	GBM	0.71652	0	0	0.283445	1	1	0	0	0	0	0	0	0	0.00983159	0	0	1	1	0	0	1	1	0	0	0	0	0	0	0.0788824	0	0	0	0	0	0	0	0	0	0	0	0	0	0	0	0	0	0	0
TCGA-14-0866-01	GBM	0	0	0	0	0	0	0	0	0	0	0	0	0	0	0	0	0	0	0	0	0	0	0	0	0	0	0	0	0	0	0	0	0	0	0	0	0	0	0	0	0	0	0	0	0	0	0	0
TCGA-14-0867-01	GBM	1	1	0	0	1	1	0	0	0	0	0	0	0	0	0	0.0108133	0	0	0	0	0	0	0	0	0	0	1	1	0	0	1	1	0	0	0	0	0	0	0	0.44555	0	0	0	0	0	0	0	0
TCGA-14-0871-01	GBM	0	0.982779	0	0	1	1	0	0	0.0280553	0	0	0	0.663024	0	0	0.00265287	0	0	0	0	0	0	1	1	0	0	0	0	0	0	0	0	0	0	0	0.0825967	0	0.039982	0.899356	0	0	0	0	0	0	0	0	0
TCGA-14-1034-01	GBM	0	0	0	0	0	0	0	0.808834	0	0	0	0	0	0	0	0.0580553	0	0	0	0	0	0	0	0	0	0	0	0	0	0	0	0	0	0	0	0	0	0	0	0	0	0	0	0	0	0	0	0
TCGA-14-1034-02	GBM	0.932037	0	0	0.0679577	1	1	0	0	0	0	0	0	0	0	0	0.0580553	1	1	0	0	1	1	0	0	0.670754	0	0	0.329212	0.114945	0	0	0.884985	0	0	0	0	0	0	0	0	0.964402	0	0	0.0355976	0.0215303	0	0	0.885242
TCGA-14-1037-01	GBM	0	0	0	0	0	0	0	0	0	0	0	0	0	0	0	0	0	0	0	0	0	0	0	0	0	0	0	0	0	0	0	0	0	0	0	0	0	0	0	0	0	0	0	0	0	0	0	0.979306
TCGA-14-1043-01	GBM	0	0	0	0	0	0	0	0	0	0	0	0	0	0	0	0	0	0	0	0	0	0	0	0	0	0	0	0	0	0	0	0	0	0	0	0	0	0	0	0	0	0	0	0	0	0	0	0
TCGA-14-1395-01	GBM	0	0	0	0	0	0	0	0.0036554	0	0	0	0	0	0	0	0	0	0	0	0	0	0	0	0	0	0	0	0	0	0	0	0	0	0	0	0	0	0	0	0	0	0	0	0	0	0	0	0
TCGA-14-1396-01	GBM	0	0	0	0.103145	0	0	0	0	0	0	0	0	0	0	0	0	0	0	0	0	0	0	0	0	0	0	0	0	0	0	0	0	1	1	0	0	1	1	0	0	0	0	0	0.111433	0	0	0	0
TCGA-14-1401-01	GBM	0	0	0	0	0	0	0	0	0	0	0	0	0	0	0	0	0	0	0	0	0	0	0	0	0	0	0	0	0	0	0	0	0	0	0	0	0	0	0	0	0	0	0	0	0	0	0	0
TCGA-14-1402-01	GBM	0	0	0	0	0	0	0	0	0	0	0	0	0	0	0	0	0	0	0	0	0	0	0	0	0	0	0	0	0	0	0	0	0	0	0	0	0	0	0	0	0	0	0	0	0	0	0	0
TCGA-14-1402-02	GBM	0	0	0	0	0	0	0	0	0	0	0	0	0	0	0	0	0	0	0	0	0	0	0	0	0	0	0	0	0	0	0	0	0	0	0	0	0	0	0	0	0	0	0	0	0	0	0	0
TCGA-14-1450-01	GBM	0	0	0	0	0	0	0	0	0	0	0	0	0	0	0	0	0	0	0	0	0	0	0	0	0	0	0	0	0	0	0	0.00380086	0	0	0	0	0	0	0	0	0	0	0	0	0	0	0	0
TCGA-14-1451-01	GBM	0	0	0	0	0	0	0	0	0	0	0	0	0	0	0	0	0	0	0	0	0	0.434713	0	0	0	0	0	0	0	0	0	0	0	0	0	0	0	0	0	0	0	0	0	0	0	0	0	0
TCGA-14-1452-01	GBM	1	1	0	0	1	1	0	0	0	0	0	0	0	0	0	0	0	0	0	0	0	0	0	0	0	0	0	0	0	0	0	0	0	0	0	0	0	0	0	0	0	0	0	0	0	0	0	0
TCGA-14-1453-01	GBM	0.909478	0	0	0.0181418	1	1	0	0	0.0630188	0	0	0.0418158	1	1	0	0	0.3791	0	0	0	0.243219	0.35628	0	0	0	0	0	0	0	0	0	0	0	0	0	0	0	0	0	0	0	0	1	1	0.054604	0	0	0.945339
TCGA-14-1454-01	GBM	1	1	0	0	0	0.999981	0	0	0	0	0	0	0	0	0	0	0	0	0	0	0	0	0	0	0	0	1	1	0	0	1	1	0	0	0	0	0	0	0	0	0	0	0	0	0	0	0	0
TCGA-14-1455-01	GBM	0	0	0	0	0	0	0	0	0	0	0	0	0	0	0	0	0	0	0	0	0	0	0	0	0	0	0	0	0	0	0	0	0	0	0	0	0	0	0	0	0	0	0	0	0	0	0	0
TCGA-14-1456-01	GBM	0	0	0	0	0	0	0	0.0908045	0	0	0	0	0	0	0	0	0	0	0	0	0	0	0	0	0	0	0	0	0	0	0	0	0	0	0.0471364	0.172711	0	0	0.0947598	0	0	0	0	0	0	0	0	0
TCGA-14-1458-01	GBM	0	0	0	0.624826	0	0	0	0	0	0	0	0	0	0	0	0	0	0	1	1	0	0	1	1	0	0	1	1	0	0	1	1	0	0	0	0	0	0	0	0	0	0	0	0	0	0	0	0
TCGA-14-1459-01	GBM	0	0	0	0	0	0	0	0	0	0	0	0	0	0	0	0	0	0	0	0	0	0	0	0	0	0	0	0	0	0	0	0	0	0	0	0	0	0	0	0	0	0	0	0	0	0	0	0
TCGA-14-1794-01	GBM	0	0	0	0	0	0	0	0	0	0	0	0	0	0	0	0	1	1	0	0	1	1	0	0	0	0	0	0	0	0	0	0	0	0	0	0	0	0	0	0	0	0	0	0	0	0	0	0
TCGA-14-1795-01	GBM	0	0	0	0	0	0	0	0	0	0	0	0	0	0	0	0	0	0	0	0	0	0	0	0	0	0	0	0	0	0	0	0	0	0	0	0	0	0	0	0	0	0	0	0	0	0	0	0
TCGA-14-1821-01	GBM	0	0	0	0	0	0	0	0.00782258	0	0	0	0	0	0	0	0	0	0.125947	0	0	0	0	0	0.11206	0	0	1	1	0.0736235	0	0	0.926365	0	0	0	0	0	0	0	0	0	0.108829	0	0	0	0	0	0
TCGA-14-1823-01	GBM	1	1	0	0	1	1	0	0	1	1	0	0	1	1	0	0	0	0	1	1	0	0	1	1	0	0	1	1	0	0	1	1	1	1	0	0	1	1	0	0	0	0	1	1	0	0	1	1
TCGA-14-1825-01	GBM	0	0	0	0	0	0	0	0	0	0	0	0	0	0	0	0	1	1	0	0	1	1	0	0	0	0	0	0	0	0	0	0	0	0	0	0	0	0	0	0	0	0	0	0	0	0	0	0
TCGA-14-1827-01	GBM	0	0.94644	0	0	0	0	0	0	0	0	0	0	0	0	0	0	0	0	0	0	0	0	0	0	0	0	0	0	0	0	0	0	0	0	0	0	0	0	0	0	0	0	0	0	0	0	0	0
TCGA-14-1829-01	GBM	0	0	0	0	0	0	0	0	0	0	0	0	0	0	0	0	0	0	0	0	1	1	0	0	0	0	0	0	0	0	0	0	0	0	0	0	0	0	0	0	0	0	0	0	0	0	0	0
TCGA-14-2554-01	GBM	0	0	0	0	0	0	0	0	0	0	0	0	0	0	0	0	0	0	0	0	0	0	0	0	0	0	0	0	0	0	0	0	0	0	0	0	0	0	0	0	0	0	0	0	0	0	0	0
TCGA-14-2555-01	GBM	0	0	0	0	0	0	0	0	0	0	0	0	0	0	0	0	0	0	0	0	0	0	0	0	0	0	0	0	0	0	0	0	0	0	0	0	0	0	0	0	0	0	0	0	0	0	0	0
TCGA-14-3477-01	GBM	1	1	0	0	1	1	0	0	1	1	0	0	1	1	0	0	0.000690287	0	0	0.994556	0.99988	0	0	0	1	1	0	0	1	1	0	0	0	0	0	0	0	0	0	0	0.11083	0	0	0	0.0377198	0.000166818	0	0
TCGA-14-4157-01	GBM	0	0	0	0	0	0	0	0	0	0	0	0	0	0	0	0.0647889	0	0	0	0.0300717	0	0	0	0.0623765	0	0	0	0	0	0	0	0	0	0	0	0	0	0	0	0	0	0	0	0	0	0	0	0.710953
TCGA-15-0742-01	GBM	0	0	0	0	0	0.469531	0	0	0	0	0	0	0	0	0	0	0	0	0	0	0	0	0	0	0	0	0	0	0	0	0	0.299058	0	0	0	0	0	0	0	0	0	0	0	0	0	0	0	0.893822
TCGA-15-1444-01	GBM	0	0	0	0	0	0	0	0	0	0	0	0	0	0	0	0	0	0	0	0	0	0	0	0	0	0	0	0	0	0	0	0	0	0	0	0	0	0	0	0.441464	0	0	0	0	0	0	0	0
TCGA-15-1446-01	GBM	0	0	0	0	0	0	0	0	0	0	0	0	0	0	0	0	0	0	0	0	0	0	0	0	0	0	0	0	0	0	0	0	0	0	0	0	0	0	0	0	0	0	0	0	0	0	0	0
TCGA-15-1447-01	GBM	1	1	0	0	0.543874	0	0	0	0	0	1	1	0	0	1	1	0	0	1	1	0	0	1	1	0.54856	0	0	0	0.00165448	0	0	0.998322	1	1	0	0	0.648403	0	0	0.266989	1	1	0	0	1	1	0	0
TCGA-15-1449-01	GBM	0	0	0	0	0	0	0	0	0	0	0	0	0	0	0	0	0	0	1	1	0	0	1	1	0	0	1	1	0	0	1	1	0	0	0	0	0	0	0	0	0	0	0	0	0	0	0	0
TCGA-16-0846-01	GBM	0	0	0	0	0	0	0	0	1	1	0	0	1	1	0	0	0	0	0	0	0	0	0	0	0	0	0	0	0.0233202	0	0	0	0	0	0	0	0	0	0	0	0	0	0	0	0	0	0	0
TCGA-16-0848-01	GBM	0	0	0	0	0	0	0	0	0	0	0	0	0	0	0	0	0	0	0	0	0	0	0	0	0	0	1	1	0	0	1	1	0	0	0	0	0	0	0	0	0	0	0	0	0	0	0	0
TCGA-16-0849-01	GBM	2.94948e-05	0	0	0	0.084809	0	0	0	0	0	0	0	0	0	0	0	0	0	0.756355	0	0	0	1.5e-05	0	0	0	1	1	0	0	0	0	0	0	0	0	0	0	0	0	0	0	0	0	0	0	0	0
TCGA-16-0850-01	GBM	1	1	0	0	1	1	0	0	0	0	0	0.0210037	0	0	0	0	1	1	0	0	1	1	0	0	1	1	0	0	1	1	0	0	0	0	0	0	0	0	1	1	0.803817	0	0	0.196134	1	1	0	0
TCGA-16-0861-01	GBM	0	0	0	0.125476	0	0	0	0	0	0	0	0	0	0	0	0	0	0	0	0	0	0	0	0	0	0	0	0	0	0	0	0	0	0	0	0	0	0	0	0	0	0	0	0	0	0	0	0.959384
TCGA-16-1045-01	GBM	0	0	0	0	0	0	0	0	0	0	0	0	0	0.320425	0	0	1	1	0	0	1	1	0	0	1	1	0	0	1	1	0	0	1	1	0	0	1	1	0	0	0	0.63954	0	0	0	0	0	0.897496
TCGA-16-1047-01	GBM	0	0	0	0	0	0	0	0	0	0	0	0	0	0	0	0	0	0	0	0	0	0	0	0	0	0	0	0	0	0	0	0	0	0	0	0	0	0	0	0	0	0	0	0	0	0	0	0
TCGA-16-1048-01	GBM	0	0	0	0.0556171	0	0	0	0	0	0	0	0	0	0	0	0	0	0	0	0	0	0.654024	0	0	0	0	0	0	0	0	0	0	0	0	0	0	0	0	0	0	0	0	0	0	0	0	0	0
TCGA-16-1055-01	GBM	0	0	0	0	0	0	0	0	0	0	0	0	0	0	0	0	0	0	0	0	0	0	0	0	0	0	0	0	0	0	0	0	0	0	0	0	0	0	0	0	0	0	0	0	0	0	0	0
TCGA-16-1056-01	GBM	0	0	0	0.186952	0	0	0	0	0	0	0	0	0	0	0	0	0	0	0	0	0	0	0	0	0	0	0	0	0	0	0	0	0	0	0	0	0	0	0	0	0	0	0	0	0	0	0	0
TCGA-16-1060-01	GBM	0	0	0	0	0	0	0	0	0	0	0	0	0	0	0	0	0	0	0	0	0	0	0	0	0	0	0	0	0	0	0	0	0	0	0	0	0	0	0	0	0	0	0	0	0	0	0	0.999338
TCGA-16-1062-01	GBM	0	0	0	0	0	0	0	0	0	0	0	0	0	0	0	0	0	0	0	0	0	0	0	0	0	0	0	0	0	0	0	0	0	0	0	0	0	0	0	0	0	0	0	0	0	0	0	0
TCGA-16-1063-01	GBM	0	0	0	0	0	0	0	0	0	0	0	0	0	0	0	0	0	0	0	0	0	0	0	0	0	0	0	0	0	0	0	0	0	0	0	0	0	0	0	0	0	0	0	0	0	0	0	0.989088
TCGA-16-1460-01	GBM	0	0	0	0	0	0	0	0	0	0	0	0	0	0	0	0	0	0	0	0	0	0	0	0	0	0	0	0	0	0	0	0	0	0	0	0	0	0	0	0	0	0	0	0.030229	0	0	0	0
TCGA-18-3406-01	LUSC	0	0.125476	0.874504	0	0	0.999981	0	0	0	0	0	0.150262	0	0	0	0	0.0286272	0	0	0.969675	1	1	0	0	0.861081	0	0	0	0.319634	0	0	0.744517	1	1	0	0	0.565856	0	0	0	0.48171	0	0	0.518169	1	1	0	0
TCGA-18-3407-01	LUSC	0	0	0	0	0	0	0	0.00782258	1	1	0	0	0.314782	0	0	0	0	0	1	1	1	1	0	0	0	0	1	1	0	0	1	1	0	0	0	0	0	0	0	0	0	0.505637	0	0	0	0	0	0
TCGA-18-3408-01	LUSC	0	0	1	1	1	1	0	0	0	0	0	0	0	0	0	0	0	0	1	1	0	0.910761	0.242992	0	0	0	0	0	0	0	0	0	0	0	2.65e-05	0	0	0	1	1	0	0	0	0	0	0	0	0
TCGA-18-3410-01	LUSC	0	0	0	0	0	0	0	0	0	0	0	0	0	0	0	0	0.0286272	0	0	0.969675	1	1	0	0	1	1	0	0	1	1	0	0	1	1	0	0	0	0	1	1	0	0	0	0	0	0.199354	0	0
TCGA-18-3411-01	LUSC	0.0605541	0	0	0.530871	1	1	0	0	1	1	0	0	0.703282	0	0	0	0	0	1	1	0	0.503451	0.000707612	0	0.177935	0	0	0.821661	0.201943	0	0	0.79804	0	0.995724	0.00391956	0	0	0	0	0.881408	0.37619	0	0	0.59743	0	0	1	1
TCGA-18-3412-01	LUSC	0	0	0	0	0	0	0	0	0	0.907329	0.092622	0	0	0	0.00496013	0	0	0	1	1	0	0.477711	0.362355	0	0.0247087	0	0	0.975289	0.0392918	0.0589537	0	0	1	1	0	0	0.107492	0	0	0	0.273329	0	0	0	0.0377222	0.254801	0	0
TCGA-18-3414-01	LUSC	0	0	0	0	0	0.962418	0	0	0	0	1	1	0	0	0	0	0	0	0.800348	0	1	1	0	0	0	0	0	0	0	0	0	0	1	1	0	0	0	0	1	1	0	0	0	0	0	0	0	0
TCGA-18-3415-01	LUSC	0	0	1	1	1	1	0	0	1	1	0	0	0.146078	0	0	0.710206	0	0	1	1	0	0.708958	0	0	0	0	1	1	0	0	1	1	1	1	0	0	0	0	1	1	0	0	0	0	0	0	0	0.941935
TCGA-18-3416-01	LUSC	0	0	0	0	0	0.999938	0	0	1	1	0	0	0	0	0	0	0	0	1	1	0	0.876	0	0	0	0.0834329	0.916512	0	0.863924	0	0	0.136047	0	0	0	0	0	0	1	1	0	0	0	0.835536	0	0.540774	0	0
TCGA-18-3417-01	LUSC	0	0	1	1	0	0.999981	0	0	1	1	0	0	0.0154792	0	0	0.984501	0	0	1	1	0	0.999778	0.000212535	0	0.0243227	0	0	0.975548	7.5e-06	0	0	0.999985	1	1	0	0	0.0345431	0	0	0.965355	0	0	1	1	0	0	0.294247	0.0577327
TCGA-18-3419-01	LUSC	0	0	0	0	0	0	0	0	1	1	0	0	0	3.47e-05	0	0	0	0	0.219251	0	1	1	0	0	0	0	0	0	0	0	0	0	0	0	0	0	0	0	0	0	0	0	0.287293	0	0	0	0	0.402361
TCGA-18-3421-01	LUSC	0	0.0973211	0	0	0	0	0	0	0	0	0	0.192877	0	0	0	0.324994	0	0	0.479068	0	1	1	0	0	0	0.131649	0	0	0	0	0	0	0	0.999974	0	0	0	0	0	0.183063	0.224798	0	0	0	0.0847063	0	0	0
TCGA-18-4083-01	LUSC	0	0	0	0.203587	0	0.34824	0	0	0	0	0	0	0	0	0	0.612843	0.0458857	0	0	0.954044	0	0.349782	0	0	0	0	0.429892	0	0	0	1	1	1	1	0	0	0	0	1	1	0	0	1	1	0	0	1	1
TCGA-18-4086-01	LUSC	0	0	0	0	0	0	0	0	0	0	0	0	0	0	0	0.249317	0	0	1	1	0	0.749245	0	0	0	0	0	0	0	0	0	0.376576	0	0.437518	0	0	0	0	0	0.988929	0	0	0	0.21143	0	0	0	0
TCGA-18-4721-01	LUSC	0.00365387	0	0	0.996325	0.315448	0.0834187	0	0	1	1	0	0	0.165365	0	0	0	0	0	0	0.999996	1	1	0	0	0.0632896	0	0	0	0	0.233392	0.766607	0	1	1	0	0	6.52e-05	0	0	0.999935	0	0	1	1	0	0	0.000662459	0
TCGA-18-5592-01	LUSC	0	0	1	1	1	1	0	0	0	0	0	0	0	0	0	0	0	0	0	0.896413	0	0.913179	0.0867992	0	0	0	1	1	0	0	1	1	1	1	0	0	0	0	0	0.999935	1	1	0	0	0.526963	0	0	0.472988
TCGA-19-0955-01	GBM	0	0	0	0	0	0	0	0	0	0	0	0	0	0	0	0	0	0	0.165022	0	0	0	0	0	0	0	0	0	0	0	0	0	1	1	0	0	1	1	0	0	0	0	0	0	0	0	0	0
TCGA-19-0957-01	GBM	0	0	0	0	0	0	0	0	1	1	0	0	1	1	0	0	0	0	0	0	0	0	0	0	0	0	0	0	0.00479891	0	0	0	0	0	0	0	0	0	0	0	0	0	0	0	0	0	0	0
TCGA-19-0957-02	GBM	0	0	0	0	0	0	0	0	0	0	0	0	0	0	0	0	0	0	0	0	0	0	0	0	0	0	0	0	0.00479891	0	0	0	0	0	0	0	0	0	0	0	0	0	0	0	0	0	0	0
TCGA-19-0960-01	GBM	0	0	0	0	0	0	0	0	0	0	0	0	0	0	0	0	0	0	0	0	0	0	0	0	0.250989	0	0	0	0	0	0	0	0	0	0	0	0	0	0	0.899738	0	0	0	0	0	0	0	0
TCGA-19-0962-01	GBM	0	0	0	0.216762	0	0.232796	0	0	0	0	0	0	0	0	0	0	0	0	0	0	0	0	0	0	0	0	0	0	0	0	0	0	0	0	0	0	0	0	0	0	0	0	0	0	0	0	0	0
TCGA-19-0963-01	GBM	0	0	0	0.276007	0	0	0	0	0	0	0	0	0	0	0	0	0	0	0	0	0	0	0	0	0	0	0	0	0	0	0	0	0	0	0	0	0	0	0	0	0	0	0	0	0	0	0	0
TCGA-19-0964-01	GBM	0	0	0	0	0	0	0	0	0	0	0	0	0	0	0	0	0	0	0.569983	0	0	0	0	0	0	0	0	0	0	0	0	0	0	0	0	0	0	0	0	0	0	0	0	0	0	0	0	0
TCGA-19-1385-01	GBM	0	0	0	0	0	0	0	0	0	0	0	0	0	0	0	0	0	0	0	0	0	0	0	0	0	0	0	0	0	0	0	0	0	0	0	0	0	0	0	0	0	0	0	0	0	0	0	0
TCGA-19-1386-01	GBM	0	0	0	0	0	0	0	0	0	0	0	0	0	0	0	0	0	0	0	0	0	0	0	0	0	0	0	0	0	0	0	0	0	0	0	0	0	0	0	0	0	0	0	0	0	0	0	0.345294
TCGA-19-1387-01	GBM	0	0	0	0	0	0	0	0	0	0	0	0	0	0	0	0	0	0	0	0	0	0	0	0	0	0	0	0	0	0	0	0	0	0	0	0	0	0	0	0	0	0	0	0	0	0	0	0
TCGA-19-1388-01	GBM	1	1	0	0	0.0789085	0	0	0	0	0	0	0	0	0	0	0	0	0	0	0.425973	0	0	0	0	0.438557	0	0	0	0.288388	0	0	0.247191	0	0	0	0	0	0.999935	0	0	0	0	0.0658298	0	0	1	2.76e-08	0
TCGA-19-1389-01	GBM	0	0	0	0	0	0	0	0	0	0	0	0	0	0	0	0	0	0	0	0	0	0	0	0	0	0	0	0	0	0	0	0	0	0	0	0	0	0	0	0	0	0	0	0	0	0	0	0
TCGA-19-1389-02	GBM	0	0	0	0	0	0	0	0	0	0	0	0	0	0	0	0	0	0	0	0	0	0	0	0	0	0	0	0	0	0	0	0	0	0	0	0	0	0	0	0	0	0	0	0	0	0	0	0
TCGA-19-1390-01	GBM	0	0.210425	0.789552	0	0	0	1	1	0	0	1	1	0	0	1	1	0	0	0	0	0	0.145666	0	0	0	0	0	0	0.0433463	0	0	0	0	0	0	0	0	0	0	0	0	0.108753	0	0	0	0	0	0
TCGA-19-1392-01	GBM	0	0	0	0	0	0	0	0	0	0	0	0	0	0	0	0	0	0	0	0	0	0	0	0	0	0.251333	0	0	0	0	0	0	0	0	0	0	0	0	0	0	0	0	1	1	0	0	1	1
TCGA-19-1786-01	GBM	0.845579	0	0	0	1	1	0	0	0	0	0	0	0	0	0	0	0	0	0	0	0	0	0	0	0	0	0	0	0	0	0	0	0	0	0	0	0	0	0	0	0	0	0	0	0	0	0	0
TCGA-19-1787-01	GBM	1	1	0	0	0	0	0	0.111466	0	0	1	1	0	0	1	1	0	0	1	1	0	0	1	1	0	0	1	1	0	0	1	1	0.787674	0	0	0.212197	0.496267	0	0	0	0	0	1	1	0	0	1	1
TCGA-19-1789-01	GBM	0	0	0	0	0	0	0	0	0	0	0	0	0	0	0	0	0	0	0	0	0	0	0	0	0	0	0	0	0	0	0	0	0	0	0	0	0	0	0	0	0	0	0	0	0	0	0	0.0716089
TCGA-19-1791-01	GBM	0	0	0	0	1	1	0	0	0	0	0	0	0	0	0	0	0	0	0	0	0	0	0	0	0	0	0	0	0	0	0	0	0	0	0	0	0	0	0	0	0	0	0	0	0	0	0	0
TCGA-19-2619-01	GBM	0	0	0	0.993988	0	0	0	0	0	0	0	0	0	0	0	0	0	0	0	0	0	0	0	0	0	0	0	0	0	0	0	0	0	0	0	0	0	0	0	0	0	0	0	0	0	0	0	0.734803
TCGA-19-2620-01	GBM	0	0	0	0	0	0	0	0	0	0	0	0	0	0	0	0	0	0	0	0	0	0	0	0	0	0	0	0	0	0	0	0	0	0	0	0	0	0	0	0	0	0	0.023134	0	0	0	0	0
TCGA-19-2621-01	GBM	0	0	0.0157908	0	0	0	0	0	0	0	0	0	0	0	0	0	0	0	0	0	0	0	0.363756	0	0	0	0	0	0	0	0	0	0	0	0	0	0	0	0	0	0	0	0	0	0	0	0	0
TCGA-19-2623-01	GBM	0	0.301582	0	0	0	0	0	0	0	0	0	0	0	0	0	0	0	0	0	0	0	0	0	0	0	0	0	0	0	0	0	0	0	0	0	0	0	0	0	0	0	0	0	0	0	0	0	0
TCGA-19-2624-01	GBM	0	0	0	0	0	0	0	0	0	0	0	0	0	0	0	0	0	0	0	0	0	0	0	0	0	0	0	0	0	0	0	0	0	0	0	0	0	0	0	0	0	0	0	0	0	0	0	0
TCGA-19-2625-01	GBM	0.797146	0	0	0	1	1	0	0	0	0	0	0.0757688	0	0	0	0	0	0.0885849	0	0	0	0	0	0	0	0	0	0	0	0	0	0	0	0	0	0	0	0	0	0	0	0	0	0	0	0	0	0
TCGA-19-2629-01	GBM	0	0	0	0	0	0.221344	0	0	1	1	0	0	0.977597	0	0	0	1	1	0	0	1	1	0	0	0	0	0	0	0	0	0	0.836827	1	1	0	0	0.29793	0.112826	0	0	0	0.825903	0.174074	0	0	0	1	1
TCGA-19-2631-01	GBM	0	0	0	0	0	0	0	0	0	0	0	0	0	0	0	0.0124887	0	0	0	0	0	0	0	0	0	0	0	0	0	0	0	0	0	0	0	0	0	0	0	0	0	0	0	0	0	0	0	0
TCGA-19-4065-01	GBM	1	1	0	0	1	1	0	0	0	0	0	0	0	0	0	0	1	1	0	0	1	1	0	0	0	0	0	0	0	0	0	0	0	0	1	1	0	0	1	1	0	0	1	1	0	0	1	1
TCGA-19-4065-02	GBM	0	0	0	0	0	0	0	0	0	0	0	0	0	0	0	0	0	0	0	0	0	0	0	0	0	0	0	0	0	0	0	0	0	0	0	0	0	0	0	0	0	0	0	0	0	0	0	0
TCGA-19-5947-01	GBM	0	0	0	0.081969	0	0	0	0	0	0	0	0	0	0	0	0	0	0	0	0	0	0	0	0	0	0	0	0	0	0	0	0	0	0	0	0	0	0	0	0	0	0	1	1	0	0	1	1
TCGA-19-5950-01	GBM	0	0	0	0	0	0	0	0	0	0	0	0	0	0	0	0	0	0	0	0	0	0	0	0	0	0	0	0	0	0	0	0	0	0	0	0	0	0	0	0	0	0	0	0	0	0	0	0
TCGA-19-5951-01	GBM	0	0	0	0	0	0	0	0	0	0	0	0	0	0	0	0	0	0	0	0	0	0	0	0	0	0	0	0	0	0	0	0	0	0	0	0	0	0	0.000765152	0	0	0	0	0	0	0	0	0
TCGA-19-5952-01	GBM	0	0	0	0	0	0	0	0	0	0	0	0	0	0	0	0	0	0	0	0	0	0	0	0	0	0	0	0	0	0	0	0	0	0	0	0	0	0	0	0	0	0	0	0	0	0	0	0.974363
TCGA-19-5953-01	GBM	0	0	0.0183804	0	0	0	0	0	0	0	0	0	0	0	0	0	0	0	0	0	0	0	0	0	0	0	0	0	0	0	0	0	0	0	0	0	0	0	0	0	0	0	0	0	0	0	0	0
TCGA-19-5954-01	GBM	0	0	0	0	0	0	0	0	0	0	0	0	0	0	0	0	0	0	0	0	0	0	0	0	0	0	0	0	0	0	0	0	0	0.00055024	0	0	0	0	0	0	0	0	0	0	0	0	0	0
TCGA-19-5955-01	GBM	0	0	0	0	0	0	0	0	0	0	0	0	0	0	0	0	0	0	0	0	0	0	0	0	0	0	0	0	0	0	0	0	0	0	0	0	0	0	0	0	0	0	0	0	0	0	0	0
TCGA-19-5956-01	GBM	0	0	0	0	0	0	0	0	0	0	1	1	0	0	1	1	0	0	0	0	0	0	0	0.118729	0	0	0	0	0	0.720195	0	0	0	0	0	0	0	0	0	0	0	0	0	0	0	0	0	0
TCGA-19-5958-01	GBM	0	0	0	0	0	0	0	0	0	0	0	0	0	0	0	0	0	0	0	0	0	0	0	0	0	0	0	0	0	0	0	0	0	0	0	0	0	0	0	0	0	0	0	0	0	0	0	0
TCGA-19-5959-01	GBM	0	0	0	0	0	0	0	0	0	0	0	0	0	0	0	0	0	0	0	0	0	0	0	0	0	0	0	0	0	0	0	0	0	0	0	0	0	0	0	0	0	0	0	0	0	0	0	0
TCGA-19-5960-01	GBM	0	0.872633	0	0	0	0	0	0	0	0	0	0	0	0	0	0	0	0	0	0	0	0	0	0	0	0	0	0	0	0	0	0	0	0	0	0	0	0	0	0	0	0	1	1	0	0.0069551	0.993014	0
TCGA-19-A60I-01	GBM	0	0	0	0	0	0	0	0	0	0	0	0	0	0	0	0	0	0	0	0	0	0	0	0	0	0	0	0	0	0	0	0	0	0	0	0	0	0	0	0	0	0	0	0	0	0	0	0
TCGA-19-A6J4-01	GBM	0	0	0	0	0	0	0	0	0	0	0	0	0	0	0	0	0	0	1	1	0	0	1	1	0	0.0159597	0	0	0	0	0	0	1	1	0	0	1	1	0	0	0	0	1	1	0	0	1	1
TCGA-19-A6J5-01	GBM	0	0	0	0	0	0	0	0	0	0	0	0	0	0	0	0	0	0	0	0	0	0	0	0	0	0	0	0	0	0	0	0.748591	0	0	0.0625015	0	0	0	0	0	0	0	0	0	0	0	0	0
TCGA-20-0987-01	OV	1	1	0	0	0.454565	0	0	0.545428	0	0	0	0	0	0	0	0.0346158	0	0	0	0	0	0	0	0	0	0	0	0	0	0	0	0	0	0.386636	0	0	0.0234506	0	0	0	0	0	0	0	0	0	0	0
TCGA-20-0990-01	OV	0	0	0	0.149135	0	0.993918	0	0	0	0	0	0.0022868	0	0.089922	0	0	0.0471741	0	0	0	1	1	0	0	0	0	1	1	0	0	1	1	0	0.962579	0.0371516	0	0	0	1	1	1	1	0	0	0.0729862	0	0	0
TCGA-20-0991-01	OV	0.150586	0	0	0.847628	1	1	0	0	0	0	0	0	0	0	0	0.909337	0.598094	0	0	0.401889	1	1	0	0	0	0	0	0.80374	0	0	0	0	0	0	0	0	0	0	0	0.984774	0	0	0	0	0	0	0	0
TCGA-20-0996-01	OV	0	0	0	0	0	0	0	0	0	0	0	0	0	0	0	0	0	0	0	0	0	0	0	0	0	0	0	0	0	0	0	0	0	0	0	0	0	0	0	0	0	0	0	0	0	0	0	0
TCGA-20-1682-01	OV	0.722504	0	0	0.27737	0.748271	0	0	0	0	0.747886	0.252038	0	0	0	1	1	1	1	0	0	1	1	0	0	0.00431646	0	0	0.995613	0	0.688164	0.55945	0	1	1	0	0	0.00230118	0	0	0	0.0355121	0	0	0.964379	0.875885	0	0	0.0240178
TCGA-20-1683-01	OV	0	0	0	0	1	1	0	0	0	0	0	0	0	0	0	0	1	1	0	0	1	1	0	0	0	0	1	1	0	0	1	1	0.000551297	0.134282	0	0	0	0	0.0776635	0	0.491161	0	0	0	3.68e-08	0	0	0
TCGA-20-1684-01	OV	0.0348787	0.11533	0	0	0.999987	0	0	0	0	0.021042	0	0	0.0259138	0.251883	0	0	0	0	0	0.533977	0.0361879	0.278914	0	0	0.00647739	0	0	0	0	0	1	1	0	0	0	0	0	0	1	1	1	1	0	0	4.6e-08	0.00681635	0	0
TCGA-20-1685-01	OV	0	0	0	0.217013	0	0	0	0	0	0	0	0	0	0	0	0	0.264397	0	0	0.118314	1	1	0	0	0.282967	0	0	0	0.302607	0	0	0.697387	0	0.777063	0	0	0	0	0.49627	0	1	1	0	0	0.0191512	0	0	0.0671804
TCGA-20-1686-01	OV	0	0	0.206676	0	0	0	1.89e-05	0	1	1	0	0	0.160074	0	0	0	0.0832783	0	0	0	0.994523	0	0	0	0	0	0	0	0	0	0	0.783666	1	1	0	0	0.0279489	0	0	0.972031	1	1	0	0	4.6e-08	0	0	0.279241
TCGA-20-1687-01	OV	0.013706	0	0	0	0.51417	0	0	0.485821	1	1	0	0	0.531814	0	0	0	0.692799	0	0	0.212608	1	1	0	0	0	0	0	0	0	0	0	0.821472	1	1	0	0	0.977865	0	0	0	0	0	0	0.0346505	0.467222	0	0	0.532776
TCGA-21-1071-01	LUSC	2.9043e-05	0	0	0.999971	1	1	0	0	0	0.862673	0	0	0	0	0	0	0	0	0	0.366705	1	1	0	0	0	0	1	1	0	0	1	1	1	1	0	0	1	1	0	0	0	0	0	0	0	0	0	0
TCGA-21-1072-01	LUSC	0	0	0	0.999971	1	1	0	0	1	1	0	0	1	1	0	0	0	0	0	0	1	1	0	0	0	0	0.0291869	0	0	0	0.999945	0	0	0.8733	0.126581	0	0	0	1	1	1	1	0	0	0.00161148	0	0	0.99725
TCGA-21-1075-01	LUSC	0	0	1	1	1	1	0	0	0	0	0	0	0	0	0	0.272826	0	0	1	1	0.896235	0	0	0.105931	0.0369905	0	0	0	0.0470847	0	0	0.920515	1	1	0	0	0	0	1	1	0	0	0	0	0	0	0	0
TCGA-21-1076-01	LUSC	0	0	0	0	0	0	0	0	0	0.898725	0	0	0	0	0	0	0	0	1	1	0	0.941178	0.058726	0	0	0	1	1	0	0	1	1	0	0	0	0	0	0	0	0.530018	0.32186	0	0	0.678086	3.68e-08	0	0	0
TCGA-21-1079-01	LUSC	0	0	0.0871636	0	0	0	2.52e-05	0	1	1	0	0	3.36e-05	0	0	0.00338188	0	0	1	1	0	0.621847	0.378129	0	0.00217218	0	0	0.961763	0	0	0	0.739913	1	1	0	0	0.00168797	0	0	0.999115	0	0	0	0	0	0	0	0
TCGA-21-1080-01	LUSC	0	0	0	0	0	0	0	0	0	0	0	0	0	0	0	0	0	0	1	1	1	1	0	0	0	0	1	1	0	0	1	1	1	1	0	0	0.0428327	0	0	0	0	0	0	0	0	0	0	0
TCGA-21-1081-01	LUSC	0	0.667737	0.332235	0	0	0.999981	0	0	0	0	0	0	0	0	0	0	0.0746787	0	0	0.925317	1	1	0	0	0	0	1	1	0	0.00249998	0.997483	0	0	0.999699	2.65e-05	0	0	0	1	1	0	0.537301	0.322289	0	0	0	1	1
TCGA-21-1082-01	LUSC	0.795595	0	0	0	0.599488	0	0	0.400473	0	0.727525	0	0	0	0	0	0	0	0	0.423027	0.064782	0	0.76411	2.8e-05	0	0.0296444	0.0359844	0	0	0.04506	0	0	0.954938	1	1	0	0	0.0207975	0.0544642	0	0	1	1	0	0	1	1	0	0
TCGA-21-5782-01	LUSC	0	0	0	0	0	0	0	0	0	0	0	0	0	0	0	0	0	0	1	1	1	1	0	0	0	0	1	1	0.0461627	0	0	0.50901	1	1	0	0	0	0	0	0	0	0.248904	0	0	0	0	0	0
TCGA-21-5783-01	LUSC	0	0	0	0	0	0	0	0	0	0.811014	0	0	0.198277	0	0	0	0	0	1	1	1	1	0	0	0	0	0	0	0	0	0	0	1	1	0	0	0	0	0	0	0	0	0	0.157367	0	0	0	0
TCGA-21-5784-01	LUSC	0	0	0	0	1	1	0	0	0	0	0	0	0	0	0	0	0	0	0	0	0	0.801709	0	0	0	0	1	1	0	0	1	1	1	1	0	0	0	0	0	0.999935	0	0	0	0	0	0	0	0
TCGA-21-5786-01	LUSC	0	0	1	1	0	0	0	0	0	0.967875	0.0295202	0	0	0	1	1	0.0178762	0	0	0.982084	1	1	0	0	0	0	0	0.973509	0	0	0	0.954737	1	1	0	0	0	0	1	1	0	0	0	0	0	0	0	0.690786
TCGA-21-5787-01	LUSC	0.434354	0	0	0	1	1	0	0	0	0	0	0	0	0	0	0.864306	0	0	1	1	0.725308	0	0	0	0	0	0	0	0.016028	0	0	0	1	1	0	0	0	0	0.701425	0	1	1	0	0	0.0341505	0	0	0.853701
TCGA-22-0940-01	LUSC	0	0	1	1	1	1	0	0	0	0.433786	0	0	0	0	0	0.250593	0	0	1	1	0	0.999942	2.8e-05	0	0	0	0	0	0	0	0	0	1	1	0	0	0	0.04119	0.0469656	0	0	0	0	0.970468	0	0	0	0
TCGA-22-0944-01	LUSC	0	0	0	0.976272	0	0	0	0	0	0	0	0	0	0	0	0.33901	0	0	0	0.969675	1	1	0	0	0.274126	0	0	0.590138	0.0158844	0	0	0.713512	1	1	0	0	0	0	1	1	0	0	0	0	0	0	0	0
TCGA-22-1000-01	LUSC	0	0	0	0	0	0	0	0	0	0	0	0	0	0	0	0	0	0	1	1	1	1	0	0	0	0	1	1	0	0	1	1	0	0	0	0	0	0	0	0	0	0	0	0	0	0	0	0
TCGA-22-1002-01	LUSC	0	0.829825	0	0	0	0	0	0	0	0	0	0	0	0	0	0	0	0	1	1	1	1	0	0	0	0	0	0	0	0	0	0	1	1	0	0	0	0	1	1	1	1	0	0	0.047524	0	0	0
TCGA-22-1005-01	LUSC	0	0	0	0	0	0	0	0	0	0	0	0	0	0	0	0	0	0	0	0	0	0	0	0	0	0	0	0.86219	0	0	0	0	0	0	0	0	0	0	0	0	0	0	0	0	0	0	0	0
TCGA-22-1011-01	LUSC	1	1	0	0	1	1	0	0	0	0	0	0	0	0	0	0.639814	0	0	0	0	0	0	0	0	0	0	1	1	0	0	1	1	0	0.999974	0	0	0	0	1	1	0	0	0	0	0	0	0	0.0825438
TCGA-22-1012-01	LUSC	0	0	0	0	1	1	0	0	0	0	0	0	0	0.588801	0	0	0	0	1	1	1	1	0	0	0	0	1	1	0	0	1	1	1	1	0	0	0.000998275	0	0	0.998933	0.0426144	0	0	0.705144	1	1	0	0
TCGA-22-1016-01	LUSC	0.588716	0	0	0	1	1	0	0	0	0.64262	0	0	0	0	0	0.128709	0	0	1	1	0	0.700269	0.299664	0	0	0	0	0	0	0	0	0.193163	1	1	0	0	0.0276481	0	0	0.972349	0	0	0	0	0	0	0	0
TCGA-22-1017-01	LUSC	0	0.162372	0.837622	0	0.767996	0	0	0.232001	0	0	0	0	0	0.572074	0	0	0	0	0.458321	0	0	0	0.0651421	0	1	1	0	0	0.0364675	0	0	0	0	0.526077	0	0	0	0	0	0	0.0684971	0	0	0	0.0861351	0	0	0
TCGA-22-4591-01	LUSC	0	0	0.00542804	0	0	0	0	0	1	1	0	0	0.136864	0	0	0	0	0	0	0.9046	1	1	0	0	0	0	0	0.193046	0	0	0	0	1	1	0	0	0	0	1	1	0.673054	0	0	0	0	0	0	0
TCGA-22-4593-01	LUSC	0	0	1	1	0	0	0.366927	0	0	0	0	0	0	0	0	0	0.0589525	0	0	0	1	1	0	0	0	0	1	1	0.602229	0	0	0	1	1	0	0	0	0	1	1	0	0	0	0.41984	0	0	0	0
TCGA-22-4594-01	LUSC	0.30103	0	0	0	1	1	0	0	0	0	0.0591038	0.221616	0	0.708001	0.212711	0	0	0	1	1	0	0	0.280745	0	0	0	1	1	0	0	1	1	1	1	0	0	0	0	0	0	0.330074	0	0	0	0.0370373	0	0	0
TCGA-22-4595-01	LUSC	0	0.479685	0	0	0	0	1	1	0.887854	0	0	0	0.243791	0.364361	0	0	0.110315	0.0876846	0	0	1	1	0	0	0.0478733	0	0	0.951273	0.197018	0	0	0.80295	0	0.999974	0	0	0	0.274201	0.725771	0	1	1	0	0	0.0481629	0	0	0.951822
TCGA-22-4596-01	LUSC	0	0	0	0	0	0	0	0	0	0	0	0	0	0	0	0	0	0	0	0	0	0	0	0	0	0	0	0	0	0	0	0	0	0	0	0	0	0	0	0	0	0	0	0	0	0	0	0
TCGA-22-4599-01	LUSC	0	0	1	1	1	1	0	0	1	1	0	0	0.167906	0	0	0	0	0	1	1	1	1	0	0	0	0	1	1	0	0	1	1	1	1	0	0	0	0	1	1	0	0	1	1	0	0	1	1
TCGA-22-4601-01	LUSC	0	0	0.268467	0.272308	0	0	0	0	0	0	0.121402	0.268372	0	0	0	0.250945	0	0	1	1	1	1	0	0	0	0	0	0	0	0	0	0	1	1	0	0	0	0	1	1	1	1	0	0	0.0355643	0	0	0.750809
TCGA-22-4604-01	LUSC	0	0	0	0	0	0	0	0	0	0.885537	0	0	0	0	0	0.889989	0	0	0	0.972186	0	0.479708	0	0	0	0	0	0.994588	0	0	0	0.767041	0.678667	0	0	0	0	0	1	1	0.68794	0	0	0	0	0	0	0
TCGA-22-4605-01	LUSC	0	0	0	0	0	0	0	0	1	1	0	0	0.62492	0	0	0.375079	0.0389317	0	0	0.961036	1	1	0	0	0	0	1	1	0	0	1	1	1	1	0	0	0	0	0	0.982268	1	1	0	0	1	1	0	0
TCGA-22-4607-01	LUSC	0.415396	0	0	0	1	1	0	0	0	0	0	0	0	0	0	0	0	0	1	1	1	1	0	0	0	0	1	1	0	0	1	1	1	1	0	0	0.0277294	0	0	0.972256	1	1	0	0	0	0	0	0.965566
TCGA-22-4609-01	LUSC	0	0	0	0.999971	0	0	0	0	0	0	0	0	0	0	0	0	0	0	1	1	1	1	0	0	0	0	1	1	0	0	0	0	1	1	0	0	0	0	1	1	0	0	1	1	0	0	0.000795109	0
TCGA-22-4613-01	LUSC	0	0	0	0	0	0	0	0	1	1	0	0	0.604304	0	0	0	0	0	1	1	0	0.933622	0	0	0	0	0	0	0	0	0	0.817783	1	1	0	0	0	0	1	1	0	0	0	0	0	0	0	0
TCGA-22-5471-01	LUSC	0.0116799	0	0	0.981675	1	1	0	0	1	1	0	0	0.0948583	0	0	0	0	0	0	0.985837	0	0.488747	0	0	0	0	1	1	0	0	0.653002	0	0	0	0	0	0	0	0	0.996468	0	0	0	0	0	0	0	0.505909
TCGA-22-5472-01	LUSC	0	0	0	0.00100599	0	0	0	0	0	0	0	0	0	0	0	0	0	0	1	1	1	1	0	0	0	0	1	1	0	0	1	1	1	1	0	0	6.52e-05	0	0	0.999935	0	0	0	0	0	0	0	0
TCGA-22-5473-01	LUSC	0	0	0	0.999971	0	0	0	0	1	1	0	0	0.0987086	0	0	0	0	0	1	1	0.0183501	0.340031	0	0	0	0	1	1	0	0	1	1	1	1	0	0	0	0	1	1	0	0	1	1	0	0	0	0
TCGA-22-5474-01	LUSC	0	0	1	1	1	1	0	0	0	0.916959	0	0	0	0	0	0.226403	0.0375284	0	0	0	1	1	0	0	0	0	1	1	0	0	1	1	1	1	0	0	6.52e-05	0	0	0.999935	0	0	0	0	0	0	0	0
TCGA-22-5477-01	LUSC	0	0	1	1	0	0	0	0	1	1	0	0	0.201727	0	0	0	0	0	1	1	1	1	0	0	0	0	0	0.999657	0	0	0	0	1	1	0	0	0	0	1	1	0.0153848	0	0	0.984527	0.487321	0	0	0
TCGA-22-5478-01	LUSC	0	0	0	0	0	0	0	0	1	1	0	0	0.0202355	0	0	0	0	0	1	1	0	0	0	0	1	1	0	0	0.0473301	0	0	0	1	1	0	0	0	0	1	1	0	0	1	1	0	0	1	1
TCGA-22-5479-01	LUSC	0	0	1	1	0	0.999981	0	0	0	0.732655	0	0	0	0	0	0	0.000401956	0	0	0.999321	1	1	0	0	0	0	1	1	0	0	1	1	0	0.365224	0.634753	0	0	0	1	1	0	0	1	1	0	0	1	1
TCGA-22-5480-01	LUSC	0	0	0	0	1	1	0	0	1	1	0	0	0.438295	0	0	0	0	0	1	1	1	1	0	0	0	0	0	0	0	0	0	0	0	0	0	0	0	0	0	0	0	0	0	0	0	0	0	0.046417
TCGA-22-5481-01	LUSC	0	0.899301	0.0993499	0	0	0.999981	0	0	0	0.427354	0	0	0	0	0	0	0	0	0	0.934949	0	0	0	0	0.13875	0	0	0	0.406132	0	0	0	1	1	0	0	0.0266204	0	0	0	0	0	0	0	0	0	0	0
TCGA-22-5482-01	LUSC	0	0	0	0	0	0	0	0	0	0	0	0	0	0	0	0.256296	0	0	1	1	1	1	0	0	0	0	0	0	0	0	0	0	1	1	0	0	0	0	1	1	0.433111	0	0	0.537301	1	1	0	0
TCGA-22-5483-01	LUSC	0.000149239	0	0	0.999839	1	1	0	0	1	1	0	0	1	1	0	0	0	0	1	1	0	0.999985	0	0	0	0	1	1	0	0	1	1	1	1	0	0	0.00989063	0	0	0.990067	0.328926	0	0	0.67107	1	1	0	0
TCGA-22-5485-01	LUSC	0	0	0.0697174	0	1	1	0	0	0	0	0	0	0	0	0	0	0	0	0	0.960301	0	0.53236	0	0	0	0	1	1	0	0	1	1	1	1	0	0	0	0	0	0.997597	0	0	0	0	0	0	0	0
TCGA-22-5489-01	LUSC	0	0	0.189497	0	1	1	0	0	0.747935	0	0	0.252042	1	1	0	0	0	0	0.466819	0	1	1	0	0	0	0	1	1	0	0	1	1	0	0	0	0	0	0	0	0	0	0	0	0	0	0	0	0.129552
TCGA-22-5491-01	LUSC	0	0	0	0.642145	0	0	0	0	1	1	0	0	0.644386	0	0	0.254291	0	0	1	1	1	1	0	0	0	0	0	0	0	0	0	0.710528	0	0	0.000390404	0	0	0	0.999842	0	0	0	0	0.90005	0	0	0	0
TCGA-22-5492-01	LUSC	0	0	0	0	0	0	0	0	0.675755	0	0	0	0.0297522	0	0	0	0.00463584	0	0	0.995308	1	1	0	0	0	0	0	0	0	0	0	0	1	1	0	0	0	0	0.67271	0	0	0	0.502041	0	0	0	1	1
TCGA-22-A5C4-01	LUSC	0	0.187301	0	0	0	0.937718	0	0	1	1	0	0	0.0253872	0	0	0	0	0	1	1	0.0148187	0	0	0	0	0	0	0	0	0	0	0.287031	1	1	0	0	0	0	1	1	0	0	0	0	0	0	0	0
TCGA-23-1021-01	OV	0.271373	0	0	0.279097	0.28554	0.321149	0	0	1	1	0	0	1	1	0	0	0.0419059	0	0	0	1	1	0	0	0	0	1	1	0	0	1	1	0.53118	0	0	0.340497	0.790013	0	0	0	0	0	1	1	0	0	1	1
TCGA-23-1022-01	OV	0	0	0.899021	0	0.537826	0	0	0.0743417	0	0	0	0.0666249	0	0	0	0	0	0	0	0	1	1	0	0	0	0	1	1	0	0	1	1	0	0	0.00227925	0.282405	0	0	0.914781	0	0.108876	0.399184	0	0	0.287302	0	0	0.210487
TCGA-23-1023-01	OV	0	0	0	0.30114	0	0	0	0.0324487	0	0	0	0	0	0	0	0	0	0	0	0	0	0.511963	0	0	0	0	0	0	0	0	0	0	0	0	0	0	0	0	0.311936	0	0	0.953403	0	0	0	0	0	0
TCGA-23-1024-01	OV	0	0.445244	0.554742	0	0.526391	0	0	0	1	1	0	0	1	1	0	0	0	0	0	0.695746	0	0.64676	0	0	0	0	0	0	0	0	0	0	1	1	0	0	0	0	0.868738	0	0	0	0	0.0164783	0	0	0	1
TCGA-23-1026-01	OV	0	0.115747	0	0	0.0656031	0	0	0	0	0	0	0	0	0.00231901	0	0	0	0.259804	0	0	0	0.406487	0	0	0	0.673385	0	0	0	0	0	0.0852789	1	1	0	0	0	0	0	0	0	0	0	0	0	0	0	0.357282
TCGA-23-1027-01	OV	0.594577	0	0	0.0099875	1	1	0	0	0	0.600367	0	0	0	0	0	0	0.244569	0.0854537	0	0	1	1	0	0	1	1	0	0	0.349949	0	0	0.650003	0.11603	0.0245135	0	0	0.105625	0.345636	0	0	0.112244	0.412693	0	0	0.194648	0	0	0.805291
TCGA-23-1028-01	OV	0.0179975	0	0	0	1	1	0	0	1	1	0	0	0.896328	0	0	0.103316	1	1	0	0	1	1	0	0	0	0.0462323	0.9537	0	0	0	1	1	1	1	0	0	0.0617058	0.0628637	0	0	1	1	0	0	0.00529451	0.222693	0	0
TCGA-23-1029-01	OV	0	0	0	0.211672	0	0	0	0.382021	0	0	0	0.227876	0	0	0	0	0.206146	0	0	0	1	1	0	0	0	0	0	0.977718	0	0	0	0.853256	1	1	0	0	0	0.152808	0.686934	0	0	0.794489	0	0	0	0	0	0
TCGA-23-1030-01	OV	0	0	0	0	0	0.696302	0	0	0	0	0	0	0	0.173778	0	0	0	0	0	0	0	0	0	0	0	0	1	1	0	0	1	1	0	0	0	0	0	0	0	0	0	0.893202	0	0	0	0	0	0.944965
TCGA-23-1031-01	OV	0.712338	0	0	0.28765	1	1	0	0	0	0	0.0472261	0	0	0	1	1	0	0	0	0.567513	0	0.725508	0	0	0	0	0	0	0	0	0	0.66057	0	0	0	0	0	0	0	0	0.862611	0	0	0	0.392208	0	0	0.272432
TCGA-23-1032-01	OV	0	0	0	0	0	0	0	0.157567	0	0	0	0	0	0	0	0.432782	0	0	0.253211	0.0662147	0	0.625806	0.374169	0	0	0	1	1	0	0	0.0727512	0.146752	1	1	0	0	0	0	1	1	0	0	0	0	0	0	0	0
TCGA-23-1109-01	OV	0	0	0	0	0	0	1	1	0.059701	0	0	0	0	0	0	0	1	1	0	0	1	1	0	0	0	0.0452908	0	0	0	0	0	0.0616217	0	0	0	0	0	0	0	0.889869	1	1	0	0	0.0239775	0	0	0.975964
TCGA-23-1110-01	OV	0	0	0	0	0	0	0	0	0	0.239666	0	0	0	0	0	0	0	0	0	0.182559	0	0	0	0	0	0.964198	0	0	0	0	1	1	0	0	0.475231	0	0	0	0.637775	0	0.798845	0	0	0	0.616663	0	0	0.383312
TCGA-23-1111-01	OV	0	0.111337	0	0	0	0	0	0	0	0	0	0	0	0.95124	0	0	0	0	0	0.3473	0	0	0	0	0	0	1	1	0	0	1	1	1	1	0	0	1	1	0	0	0.0176834	0	0	0	1	1	0	0
TCGA-23-1113-01	OV	1	1	0	0	1	1	0	0	1	1	0	0	1	1	0	0	1	1	0	0	1	1	0	0	0	0	1	1	0	0	1	1	1	1	0	0	0	0	1	1	0	0	1	1	0	0	1	1
TCGA-23-1114-01	OV	0.95648	0	0	0.0434873	1	1	0	0	1	1	0	0	0.7837	0	0	0.178268	0.205425	0	0	0.72122	1	1	0	0	1	1	0	0	0.200603	0	0	0.739706	1	1	0	0	0	0	1	1	1	1	0	0	1	1	0	0
TCGA-23-1116-01	OV	0.00718206	0	0	0	0	0	0	0	0.538901	0	0	0	0.0289175	0	0	0.971046	0	0.577421	0	0	0	0	0	0	0	0	1	1	0	0	1	1	1	1	0	0	0.00521391	0	0	0	0	0.724	0	0	0	0	0	0
TCGA-23-1117-01	OV	0.651823	0	0	0	1	1	0	0	0	0	0	0	0	0	0	0.39115	0.215127	0.148218	0	0	0.996845	0	0	0	0.161032	0	0	0.838883	0.378498	0	0	0.621128	0	0	0	0	0	0.650044	0.349875	0	0	0.746161	0	0	0	0	0	0.736617
TCGA-23-1118-01	OV	0	0.622518	0	0	0	0.841215	0	0	0	0.358323	0	0	0	0	0	0	0	0.12133	0	0	0	0.610017	0	0	0	0	0.568035	0	0	0	0.5387	0.0181082	0	0.780634	0	0	0	0.0356398	0	0	0.285194	0	0	0	0.216476	0	0	0.783471
TCGA-23-1119-01	OV	1	1	0	0	1	1	0	0	0.873731	0	0	0.126268	0.459766	0	0	0	0.629733	0	0	0.370235	1	1	0	0	0	0	1	1	0.0732393	0	0	0.851157	1	1	0	0	0.0288387	0.451122	0	0	0.791519	0	0	0	0.170419	0	0	0.0178388
TCGA-23-1120-01	OV	0	0	0	0.294316	0	0	0	0	0	0	0	0.0354393	0	0	0	0	0	0	0	0	0	0.945494	0	0	0	0	0	0	0	0	0	0.0607212	0	0.00981378	0	0	0	0.600998	0.0670945	0	0	0.770009	0	0	0	0	0	0.817793
TCGA-23-1121-01	OV	0.0836391	0.487085	0	0	1	1	0	0	0	0	0	0.452278	0.817273	0	0	0.129701	0	0	0	0	0	0.775518	0	0	0	0	0	0	0.186863	0	0	0.269528	1	1	0	0	0	0	0.0549216	0	1	1	0	0	1	1	0	0
TCGA-23-1122-01	OV	0	0.37557	0	0	0	0.146932	0	0	0	0.918958	0	0	0	0	0	0	0	0	0	0	0	0.964902	0	0	0	0.0352072	0	0	0	0	0	0.762131	1	1	0	0	0	0.039638	0	0	1	1	0	0	0.763122	0	0	0.236868
TCGA-23-1123-01	OV	1	1	0	0	1	1	0	0	0	0	0	0.0022868	0	0.619887	0	0	0.00429392	0	0	0	1	1	0	0	0	0.031124	0.968864	0	0	0	0.906466	0	0	0	1	1	0	0	1	1	0	0	1	1	0	0	1	1
TCGA-23-1124-01	OV	0	0	0	0.0460536	0	0.868346	0	0	0	0	0	0.264978	0	0	0	0.0549879	0	0	0	0.669116	0	0.55951	0	0	1	1	0	0	0.121311	0	0	0	0.0458559	0.346549	0	0	0.0465746	0	0	0.953385	0	0.410501	0	0	0.358975	0	0	0.0375165
TCGA-23-1809-01	OV	0	0.342795	0.529501	0	1	1	0	0	0.005087	0.107003	0	0	1	1	0	0	0.0236404	0	0	0	1	1	0	0	0.0869235	0	0	0.913023	0.0698498	0	0	0.930094	1	1	0	0	0.0696327	0	0	0	0.994744	0	0	0	0.393095	0	0	0.145263
TCGA-23-2072-01	OV	1	1	0	0	1	1	0	0	1	1	0	0	0.312496	0.16958	0	0	0	0.152753	0	0	0	0.702105	0	0	0	0	1	1	0	0	1	1	0	0	1	1	0	0	1	1	0	0	1	1	0	0	1	1
TCGA-23-2077-01	OV	0.0874849	0.413723	0	0	1	1	0	0	0.345611	0	0	0.122376	0.84195	0	0	0.0936924	0.855544	0	0	0	1	1	0	0	0	0.901602	0	0	0	0	0	0.26278	0	0	2.65e-05	0	0	0.202105	0.765625	0	1	1	0	0	0.059658	0.174223	0	0
TCGA-23-2078-01	OV	0	0	0	0	0	0	0	0	0	0	0	0	0	0	0	0	0	0	0	0	0	0	0	0.0518511	0	0	0	0	0	0.60482	0	0	0	0	0	0	0	0	0	0	0	0	0.578199	0	0	0	1	1
TCGA-23-2079-01	OV	0	0	0	0	0	0	0.997134	0	0	0	0.253259	0	0	0	0.329098	0	0.225572	0.173423	0	0	1	1	0	0	0	0.561601	0.438365	0	0	0	1	1	1	1	0	0	1	1	0	0	1	1	0	0	0.921842	0	0	0.0776306
TCGA-23-2081-01	OV	0	0.526654	0	0	0	0	0	0.154654	0	0.780043	0	0	0	0.830688	0	0	0	0	0	0	0	0.421165	0	0	0	0.732841	0	0	0	0	0	0.685575	0	0	0	0	0	0	0	0	0	0	0	0	0	0	0	0.271533
TCGA-23-2084-01	OV	0	0.967139	0	0	0.158978	0	0	0	0.532163	0	0	0	0.533015	0	0	0.23022	0.0570898	0	0	0	0.836893	0	0	0	0	0	1	1	0	0	1	1	0	0.699355	0	0	0	0	0	0	0.428028	0	0	0.0336678	4.6e-08	0	0	0.999978
TCGA-23-2641-01	OV	1	1	0	0	0.124206	0.335179	0	0	1	1	0	0	0.700014	0	0	0.154111	1	1	0	0	1	1	0	0	0	0.796758	0.203193	0	0	0	1	1	1	1	0	0	1	1	0	0	0.0630494	0.350418	0	0	0.714117	0	0	0.285872
TCGA-23-2643-01	OV	0	0.081969	0.991931	0	1	1	0	0	0.128582	0	0	0	1	1	0	0	0.332954	0	0	0	0.966816	0	0	0	0	0.0581751	0.897307	0	0	0	1	1	0	0.999974	0	0	0	0	1	1	0	0	0	0	0	0	0	0
TCGA-23-2645-01	OV	0	0	1	1	0	0	0	0.809105	0	0.972933	0	0	0	0	0	0	0.00201744	0.173311	0	0	1	1	0	0	0.294892	0	0	0	1	1	0	0	1	1	0	0	0.0573257	0.397559	0	0	0	0	0.266948	0.0865402	0	0	0.0417359	0
TCGA-24-0966-01	OV	0	0	0	0.174383	0	0	0	0	0	0	0	0	0	0	0	0	0	0	0	0	0	0	0	0	0	0	0	0	0	0	0	0	0	0	0	0	0	0.0407216	0	0	0	0	0	0	0	0	0	0.779631
TCGA-24-0968-01	OV	0	0	0	0	0	0	0	0	0.0396699	0	0	0	0.646744	0	0	0.35325	0	0	1	1	0	0	0.0753734	0	0	0	1	1	0	0	0.486203	0	0	0	0	0	0	0.37001	0	0	0	0	0	0.0252864	0	0	0	0
TCGA-24-0970-01	OV	0.608496	0	0	0	0.945341	0	0	0	0	0.961895	0	0	0	0	0	0	0.054192	0	0	0.945675	1	1	0	0	0	0	1	1	0	0	1	1	0	0	0	0	0	0	0	0	0	0.447128	0.350321	0	0	0	1	1
TCGA-24-0975-01	OV	0	0	0	0.305538	0	0	0	0	0	0	0	0	0	0	0	0	0	0	0	0.363636	0	0.081532	0	0	0	0	0.709631	0	0	0	0.5935	0	0	0.84866	0	0	0	0	0	0	0	0	0	0	0	0	0	0
TCGA-24-0979-01	OV	1	1	0	0	0.0789308	0.24384	0	0	0	0	0	0	0.0333144	0	0	0	0.000348927	0.310633	0	0	1	1	0	0	0	0	0	0.688308	0	0	0	0.133297	0	0.899434	0	0	0	0.265047	0	0	0	0	0	0.375723	0	0	0	0
TCGA-24-0980-01	OV	0	0	0	0.232601	0	0	0	0	0	0	0	0	0	0	0	0	0	0	0	0	0	0.282412	0	0	0	0	0	0	0	0	0	0.158518	0	0	0	0	0	0	0	0	0	0	0	0	0	0	0	0.683912
TCGA-24-0982-01	OV	0	0	0.659652	0	1	1	0	0	0	0	0	0	0	0	0	0.043734	1	1	0	0	1	1	0	0	0	0	1	1	0	0	1	1	1	1	0	0	0.0174509	0.438119	0	0	0	0.820505	0	0	0	0	0	0.993853
TCGA-24-1103-01	OV	0.301853	0	0	0.698134	1	1	0	0	0	0	0	0.35337	0	0	0	0.00850079	0.567389	0	0	0.432603	1	1	0	0	1	1	0	0	0.149139	0	0	0.850839	1	1	0	0	0.091682	0	0	0	0.237483	0.0409009	0	0	0.449199	0	0	0.550793
TCGA-24-1104-01	OV	1	1	0	0	0.511983	0	0	0	0	0	0	0	0	0	0	0	0	5.82e-05	0	0	0	0.877596	0	0	0	0	0	0	0	0	0	0	0	0	0	0	0	0.343519	0.308081	0	0	0	0.465836	0	0	0	1	1
TCGA-24-1105-01	OV	0	0	0.339237	0	1	1	0	0	0	0	0	0	0	0	0	0	1	1	0	0	1	1	0	0	0	0	0	0	0	0	0	0	1	1	0	0	1	1	0	0	1	1	0	0	0.163201	0	0	0.836721
TCGA-24-1413-01	OV	0	0	0	0.284105	0.999987	0	0	0	0	0	0	0	0	0	0	0	1	1	0	0	1	1	0	0	0	0	1	1	0	0	1	1	1	1	0	0	1	1	0	0	1	1	0	0	0.0358168	0	0	0.964178
TCGA-24-1416-01	OV	0	0.0205381	0	0	0	0.187613	0	0	0	0	0	0	0	0	0	0	0	0	0	0	0	0	0	0	0	0	0	0	0	0	0	0.830452	0	0	0	0	0	0	0	0	0	0	1	1	0	0	1	1
TCGA-24-1417-01	OV	0.725101	0	0	0	0.346369	0	0	0.122832	0	0.726429	0	0	0	0	0	0	0	0	0	0.949646	0	0.94794	0	0	0	0	0	0.971375	0	0.0156865	0.59987	0	1	1	0	0	1	1	0	0	1	1	0	0	0.0183331	0	0	0.856451
TCGA-24-1418-01	OV	0	0.143676	0	0	0	0.866728	0	0	0	0	0	0	0	0	0	0	0	0	0	0	1	1	0	0	0	0	1	1	0	0	1	1	1	1	0	0	0	0	0.634447	0	0.112244	0	0	0	0.377353	0.0236711	0	0
TCGA-24-1419-01	OV	0	0	0	0	0	0.909177	0	0	0	0	0	0	0	0	0	0	0	0	0	0	0	0.477755	0	0	0	0	0	0	0	0	0	0.834375	1	1	0	0	0	0	1	1	0	0	0	0	0	0	0	0
TCGA-24-1422-01	OV	0	0	0.510183	0	0.800713	0	0	0.117482	0.50255	0	0	0	1	1	0	0	0	0	0	0.583764	0	0	0	0	0	0	1	1	0	0	1	1	0.000390404	0	0	0	0.691606	0	0	0	0	0	0	0.0288229	0	0	0	0.0634364
TCGA-24-1423-01	OV	0	0	1	1	0.999935	0	0	0	0	0	0	0	0	0	0	0	0	0	0	0	0	0.940969	0	0	0	0	0	0	0	0	0	0.712296	0	0.732841	0	0	0	0	0	0.982385	0	0.984866	0	0	0	0	0	0.28595
TCGA-24-1424-01	OV	0	0.0394964	0	0	0	0.480251	0	0	1	1	0	0	0.228957	0	0	0	1	1	0	0	1	1	0	0	0	0	0.447562	0	0	0	0.378105	0	1	1	0	0	0.00383959	0	0	0.996159	1	1	0	0	0.110032	0	0	0.395322
TCGA-24-1425-01	OV	0.160872	0	0	0.255229	0.596786	0	0	0	0	0.000433136	0	0	0	0	0	0	0	0.811062	0	0	0	0.189445	0	0	1	1	0	0	0.182575	0	0	0.817293	1	1	0	0	0.000680697	0	0	0	1	1	0	0	0.35814	0	0	0.900931
TCGA-24-1426-01	OV	1	1	0	0	1	1	0	0	1	1	0	0	1	1	0	0	0.330837	0	0	0	0	0.870053	0.129927	0	0	0	1	1	0	0	1	1	1	1	0	0	1	1	0	0	0	0	1	1	0	0	1	1
TCGA-24-1427-01	OV	0	0	0.983248	0	0.425901	0	0	0	0	0	0	0	0	0	0	0.0155645	0.152331	0	0	0	1	1	0	0	0	0	0.110556	0	0	0.231629	0	0	1	1	0	0	0	0	0.477416	0	0	0	0	0	0	0	0	0.999978
TCGA-24-1428-01	OV	0	0.141422	0.343835	0	0	0	0.0444821	0	1	1	0	0	0.132343	0	0	0.867635	1	1	0	0	1	1	0	0	0.310987	0.196338	0	0	0.179091	0	0	0.820871	1	1	0	0	1	1	0	0	1	1	0	0	0.04949	0	0	0.950437
TCGA-24-1430-01	OV	2.94948e-05	0.455381	0	0	0.394723	0	0	0	0	0	0	0.297724	0	0.679284	0	0	0	0	0	0.448036	0	0.892015	0	0	0	0.509821	0	0	0	0	0	0.979026	1	1	0	0	0.121978	0	0	0.878005	0.808727	0	0	0.0202117	0.652907	0	0	0.347078
TCGA-24-1431-01	OV	1	1	0	0	1	1	0	0	0	0	0	0	0	0	0	0	0	0	0	0	0	0.78091	0	0	0	0	1	1	0	0	1	1	1	1	0	0	0	0	0.213077	0.184265	0	0	0	0	0	0	0	0
TCGA-24-1434-01	OV	0	0.301582	0	0	0	0	0	0	1	1	0	0	0.676437	0	0	0.576273	0	0	1	1	1	1	0	0	0.0108762	0	0	0.988931	0.0564037	0	0	0.943545	0.904804	0	0	0	0	0.2201	0.779873	0	0	0	1	1	0	0	1	1
TCGA-24-1435-01	OV	0	0	0	0.234856	0.24404	0	0	0.403035	0	0.146864	0	0	0	0.771317	0	0	0	0.139166	0	0	0	0.312077	0	0	0	0	0	0	0	0	0	0	0	0.956273	0.0436899	0	0	0	0.358232	0	0	0.470302	0.397142	0	0	0	1	1
TCGA-24-1436-01	OV	1	1	0	0	1	1	0	0	0	0	1	1	0	0	0.000282606	0.289629	0.434111	0	0	0.415478	1	1	0	0	0	0	0.945328	0	0	0	1	1	0	0	0	0	0	0.348261	0.651714	0	0	0	0.987891	0	0	0	1	1
TCGA-24-1463-01	OV	0.7658	0	0	0.23408	1	1	0	0	1	1	0	0	0.049141	0.0372957	0	0	0.521573	0	0	0.478421	1	1	0	0	0	0.334232	0	0	0	0	0	0	0	0.999974	0	0	0	0.47113	0.528868	0	1	1	0	0	0.190972	0	0	0.153585
TCGA-24-1464-01	OV	1	1	0	0	1	1	0	0	0	0	0	0.296485	0	0	0	0	0	0	1	1	0	0	0	0	1	1	0	0	0.102978	0	0	0	0	0	0	0	0	0	0	0	0	0.702244	0	0	0	0	0	0
TCGA-24-1466-01	OV	0.992323	0	0	0.00766307	0.384079	0	0	0	0.00139878	0	0	0	0	0	0	0	0	0	0	0	0	0.00547718	0	0	0	0	0	0	0.0257888	0	0	0.0405465	0	0.896595	0	0	0	0.0852885	0	0	0.386599	0	0	0	0.0975001	0	0	0.813565
TCGA-24-1467-01	OV	0	0	0	0	0.0285361	0	0	0	1	1	0	0	1	1	0	0	1	1	0	0	1	1	0	0	0	0	0	0.522941	0	0	0	0	0	0.105461	0	0	0	0	0	0.826762	0	0	0.214219	0	0	0	1	1
TCGA-24-1469-01	OV	0	0.0715689	0.897841	0	1	1	0	0	0.967171	0	0	0	0.446089	0	0	0	0	0	0	0.00172819	0	0.576421	0	0	0	0	0	0.438603	0	0	0	0	1	1	0	0	0.0270999	0	0	0.972897	1	1	0	0	0.418863	0	0	0
TCGA-24-1470-01	OV	0	0	0	0	0	0	0	0	0	0.18165	0	0	0	0	0	0.116582	0	0.947197	0	0	0	0	0	0	0.149987	0	0	0	0.199392	0	0	0.8005	0	0	0	0.708591	0	0.24592	0	0	0	0	0	0	0	0	0	0
TCGA-24-1471-01	OV	1	1	0	0	0.999935	0	0	0	0	0.133483	0	0	0	0	0	0	0	0	1	1	0	0.325475	0	0	0	0	1	1	0	0	1	1	1	1	0	0	1	1	0	0	0	0	1	1	0	0	1	1
TCGA-24-1474-01	OV	0.000432193	0.571068	0	0	0.558042	0	0	0.0403185	0	0	0	0	0	0	0	0	1	1	0	0	1	1	0	0	0	0.0288039	0	0	0	0	0	0.870453	0	0	0	0.0480436	0	0	0	0.974594	1	1	0	0	1	1	0	0
TCGA-24-1544-01	OV	0	0	0	0	1	1	0	0	1	1	0	0	0.958758	0	0	0	0	0	0	0	0	0.346678	0	0	1	1	0	0	0.0448481	0	0	0.969824	1	1	0	0	0	0	0	0	0	0	0	0	0	0	0	0
TCGA-24-1545-01	OV	0	0	0	0	0	0	0	0	0	0	0	0	0	0	0	0	0	0	0.99995	0	0	0.295301	0.704651	0	0	0.680611	0.319183	0	0	0	1	1	1	1	0	0	0.0141576	0	0	0	0	0	0	0	0	0	0	0.964722
TCGA-24-1546-01	OV	0.429955	0	0	0.217253	0.983379	0	0	0	0.458121	0	0	0.565294	0.792743	0	0	0	0.213344	0	0	0	0.921911	0	0	0.0780652	1	1	0	0	0.62718	0	0	0.372812	1	1	0	0	0.0377093	0.248237	0	0	1	1	0	0	0.0164687	0	0	0.983522
TCGA-24-1548-01	OV	0.64684	0	0	0	1	1	0	0	0	0	0	0	0	0	0	0	0.267028	0	0	0.732951	1	1	0	0	0	0	1	1	0	0	1	1	0	0	1	1	0	0	1	1	0	0	0	0	0	0	0	0
TCGA-24-1549-01	OV	1	1	0	0	1	1	0	0	0	0	0	0	0	0	0	0	0	0	0	0	0	0.300993	0	0	0	0	0	0	0	0	0	0	1	1	0	0	0	0	1	1	0	0	0	0	0	0	0	0
TCGA-24-1550-01	OV	1	1	0	0	0.290956	0	0	0	0	0.554941	0	0	0	0	0	0	0.665433	0	0	0.934439	1	1	0	0	0.146249	0.362344	0	0	0.337346	0	0	0.824384	0	0	0.0770855	0	0	0	0.736152	0	0	0.919958	0	0	0	0	0	0.416418
TCGA-24-1551-01	OV	0.0199148	0	0	0	0	0	0	0	0	0	0	0	0	0	0	0	0	0	0	0	0	0.921837	0	0	0	0	0.902442	0	0	0	1	1	0	0	0	0	0	0	0	0	0	0	0	0	0	0	0	0.0844995
TCGA-24-1552-01	OV	0	0	0	0	0	0.141318	0	0	1	1	0	0	0	0	0	0.393455	0	0.0706808	0.0831552	0	0	0	0.094232	0	0.258387	0	0	0	0	0	1	1	0	0.34059	0	0	0	0	0	0.999935	0	0	1	1	0	0	1	1
TCGA-24-1553-01	OV	0	0	0	0	0	0.779398	0	0	1	1	0	0	0.575396	0	0	0.0394264	0.374947	0	0	0.522221	1	1	0	0	0	0	0	0.0016174	0	0	0	0	1	1	0	0	0.0126328	0	0	0	0	0.656269	0.343661	0	0	0	0.693466	0
TCGA-24-1555-01	OV	0	0	0	0	0	0	0	0	0	0	0	0	0	0	0	0.00599533	0	0.605886	0	0	0	0.408125	0	0	0	0	0	0.388927	0	0	0	0.779702	0	0.90978	0	0	0	0	0	0	0	0.662405	0	0	0	0	0	0
TCGA-24-1556-01	OV	0.767014	0	0	0	1	1	0	0	0.62943	0	0	0.0974655	0.749263	0	0	0	0	0	0	0	0	0	0	0	0	0.385096	0	0	0.0146319	0	0	0.130344	1	1	0	0	0.122177	0	0	0	0.729853	0	0	0	0.361546	0	0	0.638285
TCGA-24-1557-01	OV	0.735123	1	0	0	1	1	0	0	0	0	0.440879	0	0	0.741594	0.437592	0	0	0.118124	0.263312	0	0	0	0	0.0606883	1	1	0	0	0.0388256	0	0	0.832379	1	1	0	0	0.0679244	0.0839031	0	0	0.0808105	0	0	0	0.256164	0	0	0.743815
TCGA-24-1558-01	OV	0	0	0	0	0	0.999975	0	0	0	0	0	0	0	0	0	0	0	0.327771	0	0	1	1	0	0	1	1	0	0	0	0	0	0	0	0	0	0	0	0	1	1	1	1	0	0	0.0203786	0	0	0.335858
TCGA-24-1560-01	OV	1	1	0	0	1	1	0	0	1	1	0	0	1	1	0	0	0	0	0	0	0	0	0	0	0	0	1	1	0	0	1	1	0	0	0	0	0	0	0	0	0	0	1	1	0	0	1	1
TCGA-24-1562-01	OV	0	0	0	0	0	0.999938	0	0	0	0	0	0	0	0	0	0	0	0	0	0	0	0.35209	0	0	0	0	1	1	0	0.190499	0.957675	0	0	0	0	0	0	0	0	0	0	0	0	0	0	0	0	0.91637
TCGA-24-1563-01	OV	0	0	0	0	0	0	0	0	0	0.337706	0	0	0	0	0	0	0	0	0	0	0	0	0	0	0	0.382411	0	0	0	0	0	0.85092	0	0	0	0	0	0.357677	0	0	0	0.632775	0.366904	0	0	0	2.76e-08	0.260257
TCGA-24-1564-01	OV	0.239744	0	0	0.760232	1	1	0	0	0	0	0	0	0	0	0	0	0	0	0	0	0	0.581952	0	0	0	0	0	0	0	0	0	0	0	0	0	0	0	0	0	0	1	1	0	0	0.0223634	0	0	0.570975
TCGA-24-1565-01	OV	0	0	0	0.236739	1	1	0	0	0	0	0	0	0	0	0	0	0	0	0	0	0	0	0	0	0	0	0	0	0	0	0	0	0	0	0	0	0	0	0	0	0	0	0	0	0	0	0	0
TCGA-24-1567-01	OV	1	1	0	0	0.58128	0	0	0.418689	1	1	0	0	1	1	0	0	0.28268	0.138895	0	0	1	1	0	0	0	0	1	1	0	0	1	1	0	0.74283	0.238937	0	0	0	1	1	0.639844	0	0	0.360089	0.435367	0	0	0.564591
TCGA-24-1603-01	OV	1	1	0	0	1	1	0	0	1	1	0	0	1	1	0	0	1	1	0	0	1	1	0	0	0	0.489888	0.500179	0	0	0	1	1	1	1	0	0	0.182634	0.402908	0	0	0	0.99978	1.01e-05	0	0.426962	0	0	0.57302
TCGA-24-1604-01	OV	0	0	0	0	0.964804	0	0	0	0	0.71006	0	0	0	0.333164	0	0	0.359671	0	0	0	1	1	0	0	0	0	0	0	0	0	0	0.751215	0.548329	0	0	0	6.52e-05	0.402829	0	0	0	0.862811	0	0	0	0	0	0.800788
TCGA-24-1614-01	OV	0.779287	0	0	0.220703	1	1	0	0	0.692649	0	0	0.307347	0.0484699	0.36062	0	0	0.972293	0	0	0.0275207	0.976935	0	0	0.0172624	0.151012	0	0	0	0.225262	0.123524	0	0	1	1	0	0	0	0.380235	0.61974	0	0.515792	0	0	0	1	1	0	0
TCGA-24-1616-01	OV	1	1	0	0	1	1	0	0	1	1	0	0	0.994111	0	0	0	0.0628078	0	0	0	1	1	0	0	0	0	0	0.999642	0	0	0	0	1	1	0	0	0	0.577666	0	0	0	0	0	0	0	0	0	0.377025
TCGA-24-1842-01	OV	0.0590931	0	0	0	1	1	0	0	0.376285	0	0	0	0.130591	0	0	0	0	0	0	0	1	1	0	0	0	0	1	1	0	0	1	1	0	0	0	0	0	0.0848365	0	0	0	0	0	0	0	0	0	0.999277
TCGA-24-1843-01	OV	0	0	0	0	0	0.939896	0	0	0	0	0	0	0	0	0	0	0.034664	0	0	0.802658	1	1	0	0	1	1	0	0	0.0197761	0	0	0	0	0	0	0.793222	0	0	1	1	1	1	0	0	0.00337075	0.178227	0	0
TCGA-24-1844-01	OV	0	0.00278653	0	0	0	0.965855	0	0	0	0	0	0.540573	0	0	0	0	0	0	0	0.27671	0	0	0	0	1	1	0	0	0.0295358	0	0	0.747439	0	0.873983	0	0	0	0	0	0	0.0521106	0	0	0	0.269601	0	0	0
TCGA-24-1845-01	OV	0.690371	1	0	0	1	1	0	0	0	0.699061	0	0	0	0	0	0.0423123	0	0	0	0.674463	0	0.843571	0	0	0	0.041483	0	0	0	0	0	0.784236	0.270694	0.305171	0	0	1	1	0	0	1	1	0	0	0.208377	0	0	0.791545
TCGA-24-1846-01	OV	0.760833	0	0	0.239118	1	1	0	0	1	1	0	0	0	0.473705	0.526232	0	0.101752	0	0	0.898235	1	1	0	0	1	1	0	0	0.0247218	0	0	0.975258	1	1	0	0	1	1	0	0	1	1	0	0	0.732931	0	0	0.26696
TCGA-24-1847-01	OV	0.328219	0.114055	0	0	0	0	0	0.567841	0	0	0	0.303743	0	0	0	0.877985	1	1	0	0	1	1	0	0	0	0	0.12346	0	0.198278	0	0	0	0	0.96449	0	0	0	0.157866	0.680756	0	0	0	0	0	0	0	0	0
TCGA-24-1849-01	OV	0	0	0	0	0	0	0	0	0	0	0	0.334614	0	0	0	0.0714772	0	0	0	0	0	0.689871	0	0	1	1	0	0	0.210268	0	0	0.789728	0	0	0	0	0	0	0	0	0	0.00888207	0	0	0	0	0	0.445269
TCGA-24-1850-01	OV	0	0	1	1	1	1	0	0	1	1	0	0	0.031656	0	0	0.189623	0.0776471	0	0	0.922205	0	0.495296	0.300096	0	0	0	1	1	0.0569224	0	0	0.943047	1	1	0	0	0	0.13432	0.394924	0	0.0879203	0	0	0	0.983476	0	0	0.0129376
TCGA-24-1852-01	OV	0.738412	0	0	0.259665	1	1	0	0	1	1	0	0	1	1	0	0	0	0	0	0.9196	0	0.450917	0	0	0	0.561635	0.741289	0	0	0	0	0	0	0	1	1	0	0	1	1	0	0.94246	0	0	0	0	0	0
TCGA-24-1852-02	OV	0	0	0.708919	0	1	1	0	0	0	0	0	0	0	0	0	0	0.0286272	0	0	0.969675	1	1	0	0	0	0	0	0	0	0	0	0.998829	1	1	0	0	0	0	0.227466	0	1	1	0	0	0.0415001	0	0	0
TCGA-24-1920-01	OV	0.978248	0	0	0.174767	0.294325	0.291279	0	0	0.436421	0	0	0	0.102711	0	0	0	0	0	0	0.302866	0	0	0	0	0	0.37444	0	0	0	0	0	0.957305	0	0.0115662	0	0	0.00522478	0	0	0.967881	0	0.31637	0	0	0	0.977924	0	0
TCGA-24-1923-01	OV	0	0	0	0	0	0.193642	0	0	0	0	0	0	0	0	0	0	1	1	0	0	1	1	0	0	0	0	1	1	0	0	1	1	1	1	0	0	0	0	1	1	0	0	1	1	0	0	1	1
TCGA-24-1924-01	OV	0	0	0	0.218989	1	1	0	0	0	0	0	0	0.0595393	0	0	0	0	0	0	0.233181	0	0.739228	0	0	0	0	0	0.999999	0	0	0	0.837757	1	1	0	0	0	0	0.416942	0	0	0	0	0.328203	0	0.189001	0	0
TCGA-24-1927-01	OV	0	0.115747	0	0	0	0	0	0	0	0.302497	0	0	0	0.0418528	0	0	0	0.152494	0	0	0	0.711377	0	0	0	0	0	0	0	0.336513	0	0	0	0	0	0	0	0	0	0	0	0.434862	0	0	0	0	0	0.705486
TCGA-24-1928-01	OV	0	0	0	0	0	0	0	0	0	0.965022	0	0	0	0.997647	0	0	0.0111031	0	0	0	1	1	0	0	1	1	0	0	0.179961	0	0	0.820017	1	1	0	0	0	0	0.286046	0	0.0501424	0	0	0	1	1	0	0
TCGA-24-1930-01	OV	0	0	0	0.229272	0	0.996599	0	0	0	0	1	1	0	0	0.280667	0	0	0	0	0.868118	1	1	0	0	0	0	1	1	0	0	1	1	0	0.213863	0	0	0	0.238408	0.586096	0	0	0	0	0	0	0	0	0
TCGA-24-2019-01	OV	0.0279464	0	0	0	0.0717132	0	0	0	0	0.921184	0	0	0	0	0	0.411111	1	1	0	0	1	1	0	0	0	0	0	0	0	0	0	0	0	0	0.000390404	0	0	0	1	1	0	0	1	1	0	0	1	1
TCGA-24-2020-01	OV	0.12984	0	0	0.849961	1	1	0	0	0	0.622677	0.377293	0	0.717526	0	0	0.282468	0	0.99931	0	0	0	0.926363	0	0	0	0	1	1	0	0	1	1	1	1	0	0	0	0	1	1	1	1	0	0	0.333188	0	0	0.992457
TCGA-24-2023-01	OV	1	1	0	0	1	1	0	0	1	1	0	0	0.979254	0	0	0	1	1	0	0	1	1	0	0	0	0	1	1	0	0	1	1	1	1	0	0	1	1	0	0	1	1	0	0	0.00368784	0	0	0.96136
TCGA-24-2024-01	OV	0.306786	0	0	0.693203	1	1	0	0	1	1	0	0	1	1	0	0	1	1	0	0	1	1	0	0	1	1	0	0	0.91936	0	0	0.0806015	1	1	0	0	1	1	0	0	1	1	0	0	1	1	0	0
TCGA-24-2026-01	OV	1	1	0	0	1	1	0	0	0	0	0	0	0	0	0	0	0	0	0	0	1	1	0	0	1	1	0	0	1	1	0	0	1	1	0	0	0	0	0.997275	0	1	1	0	0	0	0	0	0
TCGA-24-2027-01	OV	0.716624	1	0	0	1	1	0	0	1	1	0	0	1	1	0	0	0.0522882	0	0	0.947711	1	1	0	0	0	0.0811209	0.918607	0	0	0	1	1	1	1	0	0	0	0	1	1	0.25322	0	0	0.746449	1	1	0	0
TCGA-24-2029-01	OV	0	0	0	0.256887	1	1	0	0	1	1	0	0	0	0	0	0	0	0	0	0	0	0.723512	0	0	0	0	1	1	0	0	1	1	0	0	0	0	0	0	0.380529	0	0	0	0	0.186013	0	0	0	0
TCGA-24-2030-01	OV	0	0	0	0	0	0	0	0	0	0	0	0	0	0	0	0	0	0	0	0	0.645588	0	0	0	0	0	0	0	0.0765998	0	0	0.835817	1	1	0	0	0	0	0.723595	0	0	0.397133	0	0	0	0	0	0
TCGA-24-2033-01	OV	0.184291	0	0	0	0.317708	0	0	0	0.691477	0	0	0.274464	0.0822684	0.146941	0	0	0.0282192	0	0	0	0.89105	0	0	0	1	1	0	0	0	0	0	0	0	0.0283903	0	0	0	0	0	0.142184	0	0.638624	0	0	0	0	0	0
TCGA-24-2035-01	OV	0	0	0	0	0	0	0	0	0	0	0	0	0	0	0	0	0	0	0	0.230407	0	0	0	0	0	0.373581	0	0	0	0	0	0.0391943	0	0.599705	0	0	0	0	0	0	0	0	0	0	0	0	0	0
TCGA-24-2038-01	OV	4.05852e-05	0	0	0	1	1	0	0	0	0	0	0	0	0	0	0	1	1	0	0	1	1	0	0	0	0	0	0	0	0	0	0	0	0	0	0	0	0	0	0	0	0	0	0	0	0	0	0
TCGA-24-2254-01	OV	0.752685	0	0	0.247269	1	1	0	0	0.733232	0	0	0.266681	1	1	0	0	1	1	0	0	1	1	0	0	1	1	0	0	0.0196247	0.00442969	0	0	1	1	0	0	0.0194104	0	0	0.980584	1	1	0	0	1	1	0	0
TCGA-24-2260-01	OV	0	0.334328	0	0	0	0	0	0	0	0	0	0	0	0	0	0.930655	0.0192863	0.341303	0	0	1	1	0	0	0.251828	0	0	0	0.0177038	0	0	0.982237	1	1	0	0	0	0	1	1	0	0	0.127143	0.00244799	0	0	0	0
TCGA-24-2261-01	OV	0	0	0	0	0	0	0	0.0732411	1	1	0	0	1	1	0	0	0	0	0.99995	0	1	1	0	0	0	0	0	0.668076	0.186079	0	0	0.892794	0	0	2.65e-05	0	0	0	1	1	1	1	0	0	0.289294	0	0	0.332348
TCGA-24-2262-01	OV	0	0	0	0	0.315251	0	0	0	0	0.429429	0	0	0	0	0	0	0	0	0	0.631582	0	0.815409	0	0	0	0	0	0	0	0	0	0	0	0	0	0	0	0	0	0	0	0	0	0	0	0	0	0
TCGA-24-2267-01	OV	0.105696	0	0	0.0905255	1	1	0	0	0	0	0	0.0426762	0	0	0	0	0.333732	0.0262842	0	0	0.96205	0	0	0	0	0	1	1	0	0	1	1	0	0.694036	0	0	0	0	0	0.20074	0	0.73163	0	0	0	0	0	0.831734
TCGA-24-2271-01	OV	0.69754	0	0	0.302457	1	1	0	0	0	0	0	0	0	0	0	0	0	0.00172362	0	0	0	0.542554	0	0	0	0	1	1	0	0	1	1	0	0	0	0	0	0	0	0.96202	0	0	1	1	0	0	1	1
TCGA-24-2280-01	OV	0.943121	0	0	0.0567946	1	1	0	0	0.0406953	0	0	0.343992	0.223206	0	0	0.0730892	0	0	0	0	1	1	0	0	0	0.340613	0	0	0	0	0	0.870481	1	1	0	0	6.52e-05	0.299752	0	0	0	0	0.126047	0.31889	0	0	0.983476	0
TCGA-24-2281-01	OV	0.133542	0	0	0	0.203414	0	0	0	0	0	0	0	0	0	0	0	0.065799	0	0	0	0.976741	0	0	0	0	0	0	0	0	0	0	0.759076	0	0	0	0	0	0	0	0	0	0	0	0.292355	0	0	0	0
TCGA-24-2288-01	OV	1	1	0	0	0.314053	0	0	0	0	0	0	0.318149	0	0.0288863	0	0	0	0	1	1	0	0	0.178574	0	0	0	0	0.754704	0.00505513	0	0	0	1	1	0	0	1	1	0	0	0	0.414786	0	0	0	0	0	0
TCGA-24-2289-01	OV	0	0.191667	0.0758565	0	1	1	0	0	0.942688	0	0	0.0572939	0.931299	0	0	0.314398	0.0745702	0	0	0.0158432	0.0553023	0	0	0.158172	1	1	0	0	0.118645	0.34747	0	0	0	0.90658	0.0934124	0	0	0.258566	0.741429	0	0.258085	0.285635	0	0	0.0348295	0	0	0.141812
TCGA-24-2290-01	OV	0.780609	0	0	0	1	1	0	0	0	0	0	0.000172156	0	0	0	0.282947	0.657876	0	0	0	1	1	0	0	0	0	1	1	0	0	1	1	0.826657	0	0	0	0.0268417	0	0	0.973137	1	1	0	0	0.0120285	0	0	0
TCGA-24-2293-01	OV	0	0	0	0.103388	0	0.853239	0	0	0	0	0	0	0	0	0	0	3.7e-06	0	0	0.999651	1	1	0	0	0	0	1	1	0	0	1	1	1	1	0	0	0	0	0	0.999935	0	0.691905	0.307973	0	0	0	1	1
TCGA-24-2295-01	OV	0	0.52983	0	0	0.99302	0	0	0	0.568252	0	0	0	1	1	0	0	0.0227001	0	0	0	1	1	0	0	1	1	0	0	0.00832405	0	0	0.991676	1	1	0	0	0	0	0	0.909581	0	0	0.471844	0	0	0	1	1
TCGA-24-2297-01	OV	0	0.917736	0	0	0	0	0	0	0	0	0	0	0	0	0	0.00215246	0	0	0	0.314139	0	0	0	0	0	0.766467	0	0	0	0	0	0	0	0.876951	0	0	0	0	0	0	0	0	0	0.0962161	0	0	0	0.750911
TCGA-24-2298-01	OV	0	0.870243	0.129003	0	0	0.143693	0.038725	0	0.0586387	0	0	0.152535	0.835465	0	0	0	0.000762449	0.04992	0	0	1	1	0	0	0	0	1	1	0	0	1	1	1	1	0	0	0	0.31145	0.688527	0	0	0	1	1	0	0	1	1
TCGA-25-1312-01	OV	0	0.832582	0	0	0	0	0	0	1	1	0	0	0.0238623	0	0	0	0.0137081	0	0	0.984751	1	1	0	0	0	0	0	0	0	0	0	0.892115	0	0	1	1	0	0	0.989859	0	1	1	0	0	0.0167203	0	0	0
TCGA-25-1313-01	OV	0.724169	0	0	0.27578	0.501741	0	0	0	0.44492	0.00119058	0	0	1	1	0	0	0.061853	0	0	0	0.811619	0	0	0.163274	1	1	0	0	0.505815	0	0	0.493962	0.68525	0	0	0	0.0388303	0	0	0.904312	1	1	0	0	0.169841	0	0	0
TCGA-25-1314-01	OV	0	0	0	0	0.490473	0	0	0	0	0	0	0	0.587733	0	0	0.0247843	0.0978848	0	0	0	0.102383	0	0	0	0	0	1	1	0	0	1	1	0	0	0	0	0	0.656823	0.343139	0	1	1	0	0	0.0392768	0	0	0
TCGA-25-1315-01	OV	0	0	0	0.0556171	0	0	0	0	0	0.806766	0	0	0	0.205915	0	0	0	0	0	0	0	0.40748	0	0	0	0.0555033	0	0	0	0	0	0.73544	0	0	0	0	0	0	0	0	0	0	0	0	0	0	0	0
TCGA-25-1316-01	OV	0	0	1	1	0.999987	0	0	0	0	0	0	0	0	0	0	0	0	0.30175	0	0	0	0	0	0	0	0	1	1	0	0	1	1	0	0	0	0	0	0.112231	0	0	0	0	1	1	0	0	1	1
TCGA-25-1317-01	OV	0	0	0	0.833673	0	0	0	0	1	1	0	0	1	1	0	0	0	0	0	0.859759	0	0.778475	0	0	0	0	1	1	0	0	1	1	0	0	1	1	0	0	1	1	0	0.926417	0	0	0	0	0	0.833195
TCGA-25-1318-01	OV	0.00918851	0	0	0	0.999987	0	0	0	1	1	0	0	0.0727312	0	0	0.103983	1	1	0	0	1	1	0	0	0	0	0	0.0360621	0	0	0	0.841584	1	1	0	0	9.04e-05	0	0	0	0	0	0.14795	0	0	0	1	1
TCGA-25-1319-01	OV	0	0.379702	0	0	0.999987	0	0	0	1	1	0	0	1	1	0	0	1	1	0	0	1	1	0	0	0	0	0	0	0	0	0	0	0	0.737181	0	0	0	0	0	0	1	1	0	0	0.114454	0	0	0
TCGA-25-1320-01	OV	0	0.081969	0	0	0	0	0	0	0	0	0	0	0	0	0	0	0	0	0.906556	0	1	1	0	0	0	0.601132	0	0	0	0	0	0	0	0	0.67614	0	0	0	1	1	0	0	1	1	0	0	1	1
TCGA-25-1321-01	OV	0.0212704	0	0	0	0.999987	0	0	0	1.91e-05	0	0	0.99997	1	1	0	0	0	0	0	0.941601	0	0.922046	0	0	0	0.64583	0	0	0	0	0	0	1	1	0	0	0	0	0.961521	0	0.574006	0	0	0	0.0193895	0	0	0.967038
TCGA-25-1322-01	OV	1	1	0	0	0.131968	0	0	0	0	0	0	0	0	0	0	0	0	0.507744	0	0	0	0.973944	0	0	0	0.0599199	0	0	0	0	1	1	1	1	0	0	0	0	1	1	0	0	1	1	0	0	1	1
TCGA-25-1323-01	OV	0	0	0	0	0.999987	0	0	0	1	1	0	0	0.0209869	0.214301	0	0	0	0	1	1	1	1	0	0	0	0	1	1	0	0	1	1	0	0	1	1	0	0	0.672325	0	1	1	0	0	0.070391	0	0	0.929571
TCGA-25-1329-01	OV	1	1	0	0	1	1	0	0	0	0	0	0.0932518	0	0	0	0	1	1	0	0	1	1	0	0	0	0	0	0	0	0	0	0.717824	1	1	0	0	1	1	0	0	0	0	1	1	0	0	1	1
TCGA-25-1623-01	OV	0	0	0	0	0	0	0	0	1	1	0	0	0.0618018	0	0	0	0.222951	0	0	0.777049	1	1	0	0	0	0	1	1	0	0	1	1	0	0.770265	0	0	0	0	0	0.866936	0	0.0194974	0.980501	0	0	0	1	1
TCGA-25-1625-01	OV	0	0	0	0	0	0	0	0	0	0	0	0	0	0	0	0.276903	0	0	0	0	1	1	0	0	0	0	0	0	0	0	0	0.870147	0	0	0	0	0	0.571876	0	0	0	0	0	0	0	0	0	0.12883
TCGA-25-1626-01	OV	0.708919	0	0	0	1	1	0	0	1	1	0	0	1	1	0	0	0.000690287	0	0	0.999238	1	1	0	0	0	0	1	1	0	0	1	1	0	0	0	0	0	0	0	0.95935	0	0	1	1	0	0	1	1
TCGA-25-1627-01	OV	0.706234	0	0	0.293662	0.605427	0	0	0	0	0.307698	0	0	0	0	0	0	0.0149927	0	0	0.972648	1	1	0	0	0	0	0.0845509	0	0	0	1	1	0.999904	0	0	0	0	0	0	0	0	0.456473	0	0	0	0	0	0
TCGA-25-1628-01	OV	0	0	0	0	0	0.537408	0	0	1	1	0	0	0.00323207	0	0	0	0	0	0	0	0	0.943856	0	0	0	0.128365	0.871539	0	0	0	1	1	0	0	0	0	0	0	0	0	0	0	1	1	0	0	1	1
TCGA-25-1630-01	OV	0	0	0	0	0	0.159618	0	0	0	0	0	0.293197	0	0	0	0.127476	0	0	0	0	0	0	0	0.142142	0	0.0971305	0	0	0	0	0	0.775586	0	0.737754	0	0	0	0	0	0.882363	0	0.0472995	0	0	0	0	0	0.224765
TCGA-25-1631-01	OV	0.7116	0	0	0.288364	0.431786	0	0	0	0	0.834976	0	0	0	0	0	0	0	0	0	0	0	0	0	0	0	0	1	1	0	0	1	1	1	1	0	0	1	1	0	0	1	1	0	0	1	1	0	0
TCGA-25-1632-01	OV	0.160428	0	0	0	0.410391	0	0	0	1	1	0	0	1	1	0	0	0.325715	0	0	0	0.0799486	0	0	0.103549	0.838245	0	0	0	0.724493	0	0	0.275451	1	1	0	0	0.0424486	0.236449	0	0	0	0.194888	0	0	0	0	0	0.225295
TCGA-25-1633-01	OV	0.0186799	0	0	0	0.724864	0	0	0	1	1	0	0	1	1	0	0	0	0	1	1	1	1	0	0	0.0108762	0	0	0.988931	0.0608775	0	0	0.939071	0	0	1	1	0	0	1	1	1	1	0	0	1	1	0	0
TCGA-25-1634-01	OV	0	0	0	0	0	0.999888	0	0	1	1	0	0	1	1	0	0	1	1	0	0	0.833671	0	0	0	0	0	1	1	0	0	0.99999	0	1	1	0	0	0	0.111155	0.592079	0	1	1	0	0	0	0.0243022	0	0
TCGA-25-1635-01	OV	1	1	0	0	1	1	0	0	0	0	0	0	0	0	0	0.957906	1	1	0	0	1	1	0	0	1	1	0	0	0	0	1	1	0	0	1	1	0	0	1	1	0	0	1	1	0	0.69079	0.304565	0
TCGA-25-1870-01	OV	0	0	0	0	1	1	0	0	1	1	0	0	1	1	0	0	0.0176311	0	0	0.954347	1	1	0	0	1	1	0	0	0.0552058	0	0	0	1	1	0	0	0	0	1	1	1	1	0	0	0.031895	0	0	0
TCGA-25-1871-01	OV	0.0029608	0.0732136	0	0	1	1	0	0	0	0	0	0	0	0	0	0	0	0	0	0.340846	1	1	0	0	0	0	0.513528	0	0	0	1	1	0	0	1	1	0	0.123075	0.713179	0	1	1	0	0	1	1	0	0
TCGA-25-1877-01	OV	0	0	0	0.999971	1	1	0	0	1	1	0	0	0.575202	0	0	0.424795	0	0	1	1	1	1	0	0	0	0.999982	9.36e-07	0	0	0.339459	0.660507	0	0	0.692764	0.307104	0	0	0	1	1	0	0.999997	0	0	1	1	0	0
TCGA-25-1878-01	OV	0	0	0	0.237783	0.149694	0.405261	0	0	0	0	0	0.25387	0	0	0	0	1	1	0	0	1	1	0	0	0	0	0.543205	0	0	0	1	1	0.949026	0	0	0	0.0297384	0	0	0.937249	0	0.835471	0.164502	0	0	0	1	1
TCGA-25-2042-01	OV	0	0	0	0	0	0	0	0	0	0.107286	0	0	0	0	0	0	0	0	0	0	0	0	0	0.10693	0	0	0	0	0	0	0	0.818832	0	0	0	0	0	0	0	0	0	0	0.433111	0	0	0	1	1
TCGA-25-2391-01	OV	0	0.609399	0	0	0	0	0	0.412789	0	0.827182	0	0	0	0	0	0	0	0.142755	0.373799	0	0	0.986582	0	0	0	0.0849179	0	0	0	0	0	0.742236	0	0.784906	0	0	0	0.132306	0	0	0	0	0	0	0	0	0	0.660914
TCGA-25-2392-01	OV	0.813117	0	0	0.186838	1	1	0	0	0	0	0	0.375254	0	0.0269713	0	0	0	0.533335	0	0	0	0	0	0.0466411	1	1	0	0	0.131177	0	0	0	0	0.509864	0	0	0	0	0	0	1	1	0	0	0.273551	0	0	0
TCGA-25-2393-01	OV	0	0	0	0	0	0	0	0	0	0.999949	0	0	0	0	0	0	0.0549057	0.00172819	0	0	0.125659	0	0	0	0	0.526172	0	0	0	0	0	0	0	0.436225	0	0	0	0	0	0	0	0	0	0	0	0	0	0
TCGA-25-2396-01	OV	0	0	0.817091	0	1	1	0	0	0	0	0	0	0	0	0	0	0	0	0	0	1	1	0	0	1	1	0	0	1	1	0	0	1	1	0	0	0	0	0.775249	0	0	0	0	0	0	0	0	0
TCGA-25-2397-01	OV	0	0	0	0	0	0	0	0	0	0	0	0.285953	0	0	0	0	0	0	0	0	0	0	0	0	0	0	0	0	0	0	0	0.337069	0	0	0	0	0	0	0	0.92472	0	0.609043	0.271648	0	0	0	0.580139	0
TCGA-25-2398-01	OV	0	0	0	0	0.0385005	0	0	0.00264438	1	1	0	0	4.3e-05	0	0	0	1	1	0	0	1	1	0	0	0	0	0	0	0.0503869	0	0	0.949588	0.145699	0.372053	0	0	0	0	1	1	1	1	0	0	0.0581257	0	0	0.97284
TCGA-25-2399-01	OV	0	0	0	0	0	0	0	0	0	0	0	0	0	0	0	0	0	5.03e-05	0	0	0	0.331227	0	0	0	0	0	0	0	0	0	0	0	0	0	0	0	0	0	0	0	0	0	0	0	0	0	0
TCGA-25-2400-01	OV	0.137955	0.159552	0	0	1	1	0	0	0.675422	0	0	0	0.0725	0	0	0	0.0668106	0	0	0	1	1	0	0	0	0	0	0	0	0	0	0.985754	0.224522	0	0	0.5029	0	0	1	1	1	1	0	0	0	0	0	0
TCGA-25-2401-01	OV	0	0	0	0	0	0	0	0	0	0	0	0.203846	0	0	0	0	0	0.178478	0	0	0	0	0	0	0	0	0	0	0	0	0	0.0334406	0	0	0	0	0	0.381979	0	0	0	0.891826	0	0	0	0	0	0.991933
TCGA-25-2404-01	OV	2.9043e-05	0	0	0	0.142411	0	0	0	0	0	0	0	0	0	0	0	0	0	0	0	1	1	0	0	0	0	0	0	0	0	0	0.843021	0.541272	0	0	0	0	0	0.726818	0	1	1	0	0	0.733629	0	0	0.266256
TCGA-25-2408-01	OV	0	0	1	1	1	1	0	0	0	0	0	0	0	0	0	0	0	0	0	0	0	0	0	0	0	0	0	0	0	0	1	1	0	0	0	0	0	0	0	0	0	0	0	0	0	0	0	0
TCGA-26-1438-01	GBM	0	0	0	0	0	0	0	0	0	0	0	0	0	0	0	0	0	0	0	0	0	0	0	0	9.36e-07	0	0	0	0.0310756	0	0	0	0	0	0	0	0	0	0.118676	0	0	0	0	0	0	0	0	0.897826
TCGA-26-1439-01	GBM	0.924926	0	0	0	1	1	0	0	1	1	0	0	1	1	0	0	0	0	0	0	0	0	0	0	1	1	0	0	1	1	0	0	0	0	0	0	0	0	0	0	0	0	0	0	0	0	0	0
TCGA-26-1440-01	GBM	1	1	0	0	1	1	0	0	0	0	0	0	0	0	0	0	0	0	0.96284	0	0	0	8.92e-05	0	0	0	0	0	0	0	0	0	0	0	0	0	0	0.413741	0	0	0	0	0	0	0	0	0	0
TCGA-26-1442-01	GBM	0	0	0	0	0	0	0	0	0	0	0	0	0	0	0	0	0	0	0	0	0	0	0	0	0	0	0	0	0	0	0	0.870145	0	0	0	0	0	0	0	0	0	0	0	0	0	0	0	0
TCGA-26-1443-01	GBM	0	0	0	0	0	0	0	0	0	0	0	0	0	0	0	0	0	0	0	0	0	0	0	0	0	0	0	0	0	0	0	0	0	0	0	0	0	0	0	0	0	0	0	0	0	0	0	0.992457
TCGA-26-1799-01	GBM	0	0	0	0	0	0	0	0	0	0	0	0	0	0	0	0	0	0	0	0	0	0	0	0	0	0	0	0	0	0	0	0	0	0	0	0	0	0	0	0	0	0	0	0	0	0	0	0
TCGA-26-5132-01	GBM	0	0	0	0	0	0	0	0	0	0	0	0.403586	0	0	0	0	0	0	0	0	0	0	0	0	0	0	0	0	0	0	0	0	0	0	0	0	0	0	0	0	0	0	0	0	0	0	0	0
TCGA-26-5133-01	GBM	0.657002	0	0	0	0.564518	0	0	0.435456	0	0.334193	0	0	0	0	0	0	0	0.122223	0	0	0	0	0	0	1	1	0	0	1	1	0	0	0	0	1	1	0	0	1	1	0.420328	0	0	0	1	1	0	0
TCGA-26-5134-01	GBM	0	0	0	0	0	0	0	0	0	0	0	0	0	0	0	0	0	0	0	0	0	0	0	0	0	0	0	0	0	0	0	0	0	0	0	0	0	0	0	0	0	0	0	0	0	0	0	0
TCGA-26-5135-01	GBM	0	0	0	0	0	0	0	0	0	0	0	0	0	0	0	0	0	0	0	0	0	0	0	0	0	0	0	0	0	0	0	0	0	0	0	0	0	0	0	0	0	0	0	0	0	0	0	0
TCGA-26-5136-01	GBM	0	0	0	0	0	0	0	0	0	0	0	0	0	0	0	0	0	0	0	0	0	0	0	0	0	0	0	0	0	0	0	0	0	0	0	0	0	0	0	0	0	0	0	0	0	0	0	0
TCGA-26-5139-01	GBM	0	0	0	0	0	0	0	0	0	0	0	0	0	0	0	0	0	0	0	0	0	0	0	0	0	0	0	0	0	0	0	0	0	0	0	0	0	0	0	0	0	0	0	0	0	0	0	0
TCGA-26-6173-01	GBM	0.813286	1	0	0	1	1	0	0	0	0	0	0	0	0	0	0	0	0	0	0	0	0	0	0	0	0	0	0	0	0	0	0	0	0	0	0	0	0	0	0	0	0	0	0	0	0	0	0.394837
TCGA-26-6174-01	GBM	0	0	0	0	0	0	0	0	0	0	0	0	0	0	0	0	0	0	0	0	0	0	0	0	0	0	0	0	0	0	0	0	0	0	0	0	0	0	0	0	0	0	0	0.448812	0	0	0	0
TCGA-26-A7UX-01	GBM	0	0	0	0	0	0	0	0	0	0	0	0	0	0	0	0	0	0	0	0	0	0	0	0	0	0	0	0	0	0	0	0	0	0	0	0	0	0	0	0	0	0	0	0	0	0	0	0
TCGA-27-1830-01	GBM	0	0	0	0	0	0	0	0	0	0	0	0	0	0	0	0	1	1	0	0	1	1	0	0	0	0	0	0	0	0	0	0	0	0	0	0	0	0	0	0	0	0	0	0	0	0	0	0
TCGA-27-1831-01	GBM	0	0	0	0	0	0	0	0	0	0	0	0	0	0	0	0	0	0	0	0	0	0	0	0	0	0	0	0	0	0	0	0	0	0	0	0	0	0	0	0	0	0	0	0	0	0	0	0
TCGA-27-1832-01	GBM	0	0	0	0	0	0	0	0	0	0	0	0	0	0	0	0	0	0	0	0	0	0	0	0	0	0	0	0	0	0	0	0	0	0	0	0	0	0	0	0	0	0	1	1	0	0	1	1
TCGA-27-1833-01	GBM	0	0	0	0	0	0	0	0	0	0	0	0	0	0	0	0	0	0	0	0	0	0	0	0	0	0	0	0	0	0	0	0	0	0	0	0	0	0	0	0	0	0	0	0	0	0	0	0
TCGA-27-1834-01	GBM	0	0	0	0	0	0	0	0	1	1	0	0	1	1	0	0	1	1	0	0	1	1	0	0	0	0	0	0	0	0	0	0	0	0	1	1	0	0	1	1	0	0	0	0	0	0	0	0
TCGA-27-1835-01	GBM	0	0	0	0	0	0	0	0	0	0	0	0	0	0	0	0	0	0	0	0	0	0	0	0	0	0	0	0	0	0	0	0	0	0	0	0.103505	0	0	0	0	0	0	0	0	0	0	0	0
TCGA-27-1836-01	GBM	0	0	0	0	0	0	0	0	0	0	0	0	0	0	0	0	0	0	0	0	0	0	0	0	0	0	0	0	0	0	0	0	0	0	0	0	0	0	0	0	0	0	0	0	0	0	0	0
TCGA-27-1837-01	GBM	0	0	0	0	0	0	0	0	0	0	0	0	0	0	0	0	0	0	0	0	0	0	0	0	0	0	1	1	0	0	0	0	0	0	0	0	0	0	0	0	0	0	0	0	0	0	0	0
TCGA-27-1838-01	GBM	0	0	0	0	0	0	0	0	0	0	0	0	0	0	0	0	0	0	0	0	0	0	0	0	0	0	0	0	0	0	0	0	0	0	0	0	0	0	0	0	0	0	0	0	0	0	0	0
TCGA-27-2518-01	GBM	0	0	0	0	0	0	0	0	0	0	0	0	0	0	0	0	0	0	0	0	0	0	0	0	0	0	0	0	0	0	0	0	0	0	0	0	0	0	0	0	0	0	0	0	0	0	0	0
TCGA-27-2519-01	GBM	0	0	0	0	0	0	0	0	0	0	0	0	0	0	0	0	0	0	0	0	0	0	0	0	0	0	0	0	0	0	0	0	0	0	0	0	0	0	0	0	0	0	0	0	0	0	0	0
TCGA-27-2521-01	GBM	0	0	0	0.0971979	0	0	0	0	0	0	0	0.0022868	0	0	0	0	0	0	0	0	0	0	0	0.0716267	0	0	0	0	0	0	0	0	0	0	0	0	0	0	0	0.237374	0	0	0	0.0693719	0	0	0	0.00102286
TCGA-27-2523-01	GBM	0	0	0	0	0	0	0	0	0	0	0	0	0	0	0	0	0	0	0	0	0	0	0	0	0	0	0	0	0	0	0	0	0	0	0	0	0	0	0	0	0	0	0	0	0	0	0	0
TCGA-27-2524-01	GBM	0	0	0	0.0762563	0	0.933024	0	0	0	0	0	0	0	0	0	0	0	0	0	0	0	0	0	0	0	0	0	0	0	0	0	0	0	0	0	0	0	0	0	0	0	0	0	0.126275	0	0	0	0.838588
TCGA-27-2526-01	GBM	0	0	0	0	0	0	0	0	0	0	0	0	0	0	0	0	0	0	0	0	0	0	0	0	0	0	0	0	0	0	0	0	0	0	0	0	0	0	0	0	0	0	0	0	0	0	0	0.739838
TCGA-27-2527-01	GBM	0	0	0	0	0	0	0	0	0	0	0	0	0	0	0	0.00175274	0	0	0	0	0	0	0	0	0	0	0	0	0	0	0	0	0	0	0	0	0	0	0	0	0	0	0	0	0	0	0	0
TCGA-27-2528-01	GBM	0	0	0	0	0	0	0	0	0	0	0	0	0	0	0	0	0	0	0	0	0	0	0	0.112096	0	0	0	0	0	0	0	0	0	0	0	0	0	0	0	0	0	0	0	0	0	0	0	0
TCGA-28-1746-01	GBM	0	0	0	0	0	0	0	0	0	0	0	0	0	0	0	0	0	0	0	0	0	0	0	0	0	0	0	0	0	0	0	0	0	0	0	0	0	0	0	0	0	0	0	0	0	0	0	0
TCGA-28-1747-01	GBM	0	0	0	0	0	0	0	0	0	0	0	0	0	0	0	0	0	0	0	0	0	0	0	0	0	0	0	0	0	0	0	0	0	0	0	0	0	0	0	0	0	0	0	0	0	0	0	0.312327
TCGA-28-1749-01	GBM	0	0	0	0	0	0	0	0	0	0	0	0	0	0	0	0	0	0	0	0	0	0	0	0	0	0	0	0	0	0	0	0.0547609	0	0	0	0	0	0	0	0	0	0	0	0	0	0	0	0
TCGA-28-1750-01	GBM	0	0	0	0.0932653	0	0	0	0	0	0	0	0	0	0	0	0	0	0	0	0	0	0	0	0	0	0	0	0	0	0	0	0	0	0	0	0	0	0	0	0	0	0	1	1	0	0	1	1
TCGA-28-1751-01	GBM	0	0	0	0	0	0	0	0	0	0	0	0	0	0	0	0	0	0	0	0	0	0	0	0	0	0	0	0	0	0	0	0	0	0	0	0	0	0	0	0	0	0	0	0	0	0	0	0
TCGA-28-1752-01	GBM	0	0	0	0	0	0	0	0	0	0	0	0	0	0	0	0	0	0.044876	0.955086	0	0	0.381097	0.618792	0	0	0	0	0	0	0	0	0	0	0	0	0	0	0	0	0	0	0	0	0	0	0	0	0
TCGA-28-1753-01	GBM	0	0	0	0	0	0	0	0	0	0	0	0	0	0	0	0	0	0	0	0	0	0	0	0	0	0	0	0	0	0	0	0	0	0	0	0	0	0	0	0	0	0	0	0	0	0	0	0.103046
TCGA-28-1755-01	GBM	0	0	0	0	0	0	0	0	0	0	0	0	0	0	0	0	0	0	0	0	0	0	0	0	0	0	0	0	0	0	0	0	0	0	0	0.891768	0	0	0	0	0	0	0	0	0	0	0	0
TCGA-28-1756-01	GBM	0	0	0	0.0238115	0	0	0	0	0	0	0	0.362587	0	0	0	0	0	0	0	0	0	0	0	0	0	0	0	0	0	0	0	0.139114	0	0	0	0	0	0	0	0.261971	0	0	0	0	0	0	0	0
TCGA-28-1757-01	GBM	0	0	0	0	0	0	0	0	0	0	0	0	0	0	0	0	0	0	0	0	0	0	0.427981	0	0	0	0	0	0	0	0	0	0	0	0	0	0	0	0	0	0	0	0	0.0464295	0	0	0	0
TCGA-28-2501-01	GBM	0	0	0	0.0671227	0	0	0	0	0	0	0	0	0	0	0	0	0	0	0	0	0	0	0	0	0	0	0	0	0	0	0	0	0	0	0	0	0	0	0	0	0	0	0	0	0	0	0	0
TCGA-28-2502-01	GBM	0	0	0	0.081969	0	0	0	0	0	0	0	0	0	0	0	0	0	0	0	0	0	0	0	0	0	0	0	0	0	0	0	0	0	0	0	0	0	0	0	0	0	0	0	0	0	0	0	0
TCGA-28-2506-01	GBM	0	0	0	0	0	0	0	0	0	0	0	0	0	0	0	0	1	1	0	0	1	1	0	0	1	1	0	0	1	1	0	0	1	1	0	0	1	1	0	0	0	0	1	1	0	0	1	1
TCGA-28-2509-01	GBM	1	1	0	0	1	1	0	0	0	0	1	1	0	0	1	1	0	0	0	0	0	0	0	0	0	0	0	0	0	0	0	0	0	0	0	0	0	0	0	0	0	0	1	1	0	0	1	1
TCGA-28-2510-01	GBM	0	0	0	0.0560546	0	0	0	0	0	0	0	0	0	0	0	0	1	1	0	0	1	1	0	0	0	0	0	0	0	0	0	0	0	0	0	0	0	0	0	0	0	0	0	0	0	0	0	0
TCGA-28-2513-01	GBM	0	0	0	0	0	0	0	0	0	0	0	0	0	0	0	0	0	0	0	0	0	0	0	0	0	0	0	0	0	0	0	0	0	0	0	0	0	0	0	0	0	0	0	0	0	0	0	0
TCGA-28-2514-01	GBM	0	0	0	0	0	0	0	0	0	0	0.0228509	0	0	0	0	0	0	0	0	0	0	0	0	0	0	0	0	0	0	0	0	0	0	0	0	0	0	0	0	0	0	0	0	0	0	0	0	0
TCGA-28-5204-01	GBM	0	0	0	0	0	0	0	0	0	0	0	0	0	0	0	0	0	0	0	0	0	0	0	0	0	0	0	0	0	0	0	0	0	0	0	0	0	0	0	0	0	0	0	0	0	0	0	0.99583
TCGA-28-5207-01	GBM	0	0	0	0	0	0	0	0	0	0	0	0	0	0	0	0	0	0	0	0	0	0.159741	0	0	0	0	0	0	0	0	0	0	0	0	0	0	0	0	0	0	0	0	0	0	0	0	0	0.0801878
TCGA-28-5208-01	GBM	0	0	0	0	0	0	0	0	0	0	0	0	0	0	0	0	0	0	0	0	0	0	0	0	0	0	0	0	0	0	0	0	0	0	0	0	0	0	0	0	0	0	0	0	0	0	0	0
TCGA-28-5209-01	GBM	0	0	0	0	0	0	0	0	0	0	0	0	0	0	0	0	0	0	0	0.00172819	0	0	0	0	0	0	0	0	0	0	0	0	0	0	0	0	0	0	0	0	0	0	0	0	0	0	0	0.979137
TCGA-28-5211-01	GBM	0	0	0	0.0663283	0	0	0	0	0	0	0	0	0	0	0	0	0	0	0	0	0	0	0	0	0	0	0	0.407901	0	0	0	0	0	0.00888883	0	0	0	0	0	0	0	0	0	0	0	0	0	0
TCGA-28-5213-01	GBM	0	0.0013549	0	0	0	0	0	0	0	0	0	0	0	0	0	0	0	0	0	0	0	0	0	0	0	0	0	0	0	0	0	0	0	0	0	0	0	0	0	0	0	0	0	0	0	0	0	0.999978
TCGA-28-5214-01	GBM	0	0	0	0	0	0	0	0	0	0	0	0	0	0	0	0	0	0	0	0	0	0	0	0	0	0	0	0	0	0	0	0	0	0	0	0	0	0	0	0	0	0	0	0	0	0	0	0
TCGA-28-5215-01	GBM	0	0	0	0	0	0	0	0	0	0	0	0	0	0	0	0	1	1	0	0	1	1	0	0	0.398822	0	0	0	0.0866851	0	0	0	0	0	1	1	0	0	1	1	0	0	0	0	0	0	0	0
TCGA-28-5216-01	GBM	1	1	0	0	1	1	0	0	0	0	0	0	0	0	0	0	1	1	0	0	1	1	0	0	0	0	0	0	0	0	0	0	1	1	0	0	1	1	0	0	0	0	0	0	0	0	0	0
TCGA-28-5218-01	GBM	2.9043e-05	0	0	0.999971	1	1	0	0	0	0	0	0	0	0	0	0	0	0	1	1	0	0	1	1	0	0	1	1	0	0	1	1	0	0	1	1	0	0	1	1	0	0	1	1	0	0	1	1
TCGA-28-5219-01	GBM	0	0	0	0	0	0	0	0	0	0	0	0	0	0	0	0	1	1	0	0	1	1	0	0	0	0	0	0	0	0	0	0	0	0	0	0	0	0	0	0	0	0	0	0	0	0	0	0
TCGA-28-5220-01	GBM	0	0	0	0	0	0	0	0	0	0	0	0	0	0	0	0	0	0	0	0	0	0	0.671241	0.0965909	0	0	0	0	0	0	0	0	0	0	0	0	0	0	0	0	0	0	1	1	0	0	1	1
TCGA-28-6450-01	GBM	0	0.181212	0	0	0	0	0	0	0	0	0	0	0	0	0	0	0	0	0	0	0	0	0	0	0	0	0	0	0	0	0	0	0	0	0	0	0	0	0	0	0	0	0	0	0	0	0	0
TCGA-29-1688-01	OV	0.567985	0	0	0.2096	1	1	0	0	0	0	0.143895	0	0	0	0.358348	0.119212	0.855928	0	0	0.144067	1	1	0	0	0	0	1	1	0.145838	0	0	0.854063	1	1	0	0	0.75463	0	0	0.245356	0.725751	0	0	0.168223	0.0110979	0	0	0.988815
TCGA-29-1690-01	OV	0	0	0	0.999971	1	1	0	0	0	0	0	0	0	0	0	0	0	0	0	0	0	0	0	0	0	0	0	0	0	0	0	0	0	0	0	0	0	0	0	0	0	0	0	0	0	0	0	0
TCGA-29-1691-01	OV	0.0246376	0.105519	0	0	0.401999	0	0	0	0	0.783309	0	0	0	0	0	0.093429	0	0	0.448573	0.0372368	0	0.814334	0.0620567	0	0	0.920849	0	0	0.178567	0.137757	0	0	0	0.694838	0	0	0	0	0	0	0	0	0	0	0	0	0	0
TCGA-29-1692-01	OV	0	0	0	0	0	0	0	0.0668117	0	0.534146	0	0	0	0.000530053	0	0	0	0.475053	0.496768	0	0	0.750227	0.214328	0	0	0	0.607996	0	0	0	0.557811	0	0	0.737959	0	0	0	0	0	0	0	0.523578	0.129241	0	0	0	1	1
TCGA-29-1692-02	OV	0	0	0	0	0	0	0	0	0	0.534146	0.218854	0	0	0.887383	0.112591	0	0	0	0	0	0	0.669357	0	0	0	0	0.607996	0	0	0	0.316504	0.104007	1	1	0	0	0	0	0	0	0	0.870661	0	0	0	0	0	0.887175
TCGA-29-1693-01	OV	0.98921	0	0	0.010775	1	1	0	0	0	0	1	1	0	0	1	1	0.112598	0	0	0.887389	1	1	0	0	0	0	0	0	0	0	0	0.204546	1	1	0	0	0.98876	0	0	0	1	1	0	0	0.452904	0	0	0.918686
TCGA-29-1694-01	OV	0	0	0	0	0	0.913138	0	0	0	0.11565	0	0	0	0.396548	0	0	1	1	0	0	1	1	0	0	0.327594	0	0	0.672399	0.28193	0	0	0.307244	1	1	0	0	0.00749559	0.317855	0	0	0	0	1	1	0	0	1	1
TCGA-29-1695-01	OV	0	0	0	0	1	1	0	0	0	0	0	0	0	0.999964	0	0	0	0	0	0.0821906	0	0.529479	0.624823	0	0	0	1	1	0	0	1	1	1	1	0	0	0	0	1	1	1	1	0	0	0.999991	0	0	0
TCGA-29-1696-01	OV	0	0	0	0.231276	0	0	0	0	0	0.00102746	0	0	0	0.692734	0	0	0	0	0	0	0	0	0	0	0	0	0	0	0	0	0	0.486567	0	0.459354	0	0	0	0	0	0	0	0	0	0	0	0	0	0.634911
TCGA-29-1697-01	OV	1	1	0	0	1	1	0	0	1	1	0	0	1	1	0	0	0.67667	0	0	0.323325	1	1	0	0	0	0	1	1	0	0	1	1	1	1	0	0	0.00106678	0	0	0	0	0	1	1	0	0	0.077668	0
TCGA-29-1698-01	OV	0	0.64355	0.237419	0	0	0	0	0	0.98383	0	0	0	0.0397613	0	0	0	0	0	0	0.876929	1	1	0	0	0	0	0	0.624617	0	0	0	0.759393	0	0	0	0	0	0	0	0	0.340517	0	0	0	1	1	0	0
TCGA-29-1699-01	OV	0	0	0	0	0	0	0	0	0.0328845	0	0	0	0.0161218	0	0	0.440964	0.294828	0	0	0	0.304827	0	0	0	0	0	1	1	0	0	0.117031	0	0	0	0	0	0	0	0	0	0	0	0	0	0	0	0	0
TCGA-29-1701-01	OV	0	0.0492364	0	0	0	0.999581	0	0	1	1	0	0	0.063466	0	0	0.931809	0.0227001	0	0	0	1	1	0	0	0	0.0188047	0.723938	0	0	0.974339	0.0147626	0	0.32788	0	0	0	0	0	1	1	0	0	0	0	0	0	0	0
TCGA-29-1702-01	OV	0	0	0	0	1	1	0	0	1	1	0	0	0.0285178	0	0	0	0	0	0	0	1	1	0	0	0.0271915	0	0	0	1	1	0	0	0	0	1	1	0	0	1	1	0.974244	0	0	0	1	1	0	0
TCGA-29-1703-01	OV	0	0.286838	0	0	0.190285	0.137935	0	0	0	0.05445	0	0	0	0	0	0.157682	0.0230545	0	0	0	1	1	0	0	0	0	0	0	0	0	0	0	0	0	0	0	0	0.452095	0	0	0	0	0	0.537301	0	0	0	0
TCGA-29-1704-01	OV	0	0	0	0	0	0.314653	0	0	0	0	0	0	0	0	0	0.163711	0	0	0	0	0	0.995811	0	0	0	0	0	0	0	0	0	0.808547	0	0	0	0	0	0	0	0	0	0.389583	0	0	0	0	0	0.850404
TCGA-29-1704-02	OV	0	0	0	0	0	0.0302107	0	0	0	0	0	0	0	0	0	0.163711	0	0	0	0	0	0.711046	0	0	0	0.257263	0	0	0	0	0	0.28244	0	0	0	0	0	0.0947117	0	0	0	0.182559	0	0	0	0	0	0.850174
TCGA-29-1705-01	OV	0	0	0.458978	0	0.51697	0	0	0.545976	0.0016285	0.144542	0	0	0	0	0	0	1	1	0	0	1	1	0	0	1	1	0	0	0.0139366	0	0	0.986036	0.856297	0	0	0	0.0589601	0	0	0.941011	0	0	0	0	0	0	0	0.609796
TCGA-29-1705-02	OV	0	0	0.458993	0	0	0	0	0.482868	0.00158481	0	0	0	0	0	0	0	0	0.209129	0	0	0	0.921579	0	0	0	0	0	0	0	0	0	0.95406	0	0.566567	0	0	0	0	0	0	0	0	0	0	0	0	0	0.60979
TCGA-29-1707-01	OV	0.741948	0	0	0.258015	0.501464	0	0	0.498449	0	0	0	0	0	0	0	0.0309637	0	0	0	0	0	0.0295965	0	0	0	0	0	0	0	0	0	0.365072	0.826989	0	0	0.172906	0.0166894	0	0	0.978856	0	0	0	0.0764132	0	0	0	0.957144
TCGA-29-1707-02	OV	0.741993	0	0	0	0.965726	0	0	0	0	0	0	0	0	0	0	0.0309637	0	0.548439	0	0	0	0.905154	0	0	0.252132	0	0	0	0.0361936	0	0	0.365072	1	1	0	0	0	0	0	0.355368	0	0	0	0.0764132	0	0	0	0.957153
TCGA-29-1710-01	OV	0	0.234475	0	0	1	1	0	0	0	0	0	0	0	0	0	0	0	0	1	1	1	1	0	0	0	0	0	0	0	0	0	0	0	0	0	0	0	0	0.866224	0	1	1	0	0	0	0	0	0
TCGA-29-1710-02	OV	0	0.403525	0	0	1	1	0	0	1	1	0	0	0.789481	0	0	0.267356	0	0	1	1	1	1	0	0	0	0	1	1	0	0	1	1	0	0	0	0	0	0.612877	0	0	1	1	0	0	0	0.115019	0	0
TCGA-29-1711-01	OV	0	0.0655423	0	0	1	1	0	0	0	0.779353	0	0	0	0	0	0.189377	0	0	0	0	0	0.804738	0	0	1	1	0	0	0	0	0	0.112031	0	0	0	0	0	0.0754693	0	0	0	0.0463139	0	0	0	0	0	0
TCGA-29-1761-01	OV	0.726552	0	0	0.273401	0.316871	0	0	0	0	0.025138	0	0	0	0.787103	0	0	0	0	1	1	0.897621	0	0	0	0	0	0	0	0	0	0	0.904722	0	0.856671	0.0986661	0	0	0	0.289598	0	0	0	0	0	0	0.991733	0	0
TCGA-29-1762-01	OV	1	1	0	0	0.998701	0	0	0.00128563	1	1	0	0	1	1	0	0	0.630711	0	0	0.369289	1	1	0	0	0	0	1	1	0	0	1	1	1	1	0	0	0	0	0	0.999935	1	1	0	0	0.0475918	0	0	0.952374
TCGA-29-1763-01	OV	0.675882	0	0	0	0.475949	0	0	0	0	0.376279	0	0	0	0.48166	0	0	0	0.0743091	0.925657	0	0.26207	0	0	0.737871	0	0.932778	0	0	0	0.509975	0	0	1	1	0	0	0.116527	0	0	0.883452	1	1	0	0	0.589315	0	0	0.667075
TCGA-29-1764-01	OV	0.749719	0	0	0.250247	1	1	0	0	1	1	0	0	1	1	0	0	0	0	1	1	0	0	0.0222359	0.241443	0.442159	0.0408008	0	0	0.188494	0	0	0.312551	0	0.902585	0	0	0	0	0	0.87405	0	0.747658	0	0	0	0	0	0.665913
TCGA-29-1766-01	OV	0	0	0.134211	0	1	1	0	0	0	0.160099	0	0	0	0.510405	0	0	0.00533409	0	0	0	1	1	0	0	0	0	0	0	0	0	0	0	1	1	0	0	0	0	1	1	0	0	0	0	0	0	0	0.66077
TCGA-29-1768-01	OV	0.750899	0	0	0.249085	0.417098	0	0	0.582875	0	0	0	0	0	0	0	0	1	1	0	0	0.872829	0	0	0.127125	0	0.0251838	0	0	0	0	0	0.106056	0	0.835851	0	0	0	0	0	0	1	1	0	0	0.0790904	0	0	0.920902
TCGA-29-1769-01	OV	0.397493	1	0	0	1	1	0	0	0.250605	0	0	0	0.682126	0	0	0.305123	0	0	0	0	0	0	0	0	0	0.396436	0.25492	0	0.00747424	0	0	0.772026	1	1	0	0	0.0348599	0.0915017	0	0	1	1	0	0	0.0482824	0	0	0
TCGA-29-1770-01	OV	0.773771	0	0	0.226219	0.168579	0.319789	0	0	0	0	0.625206	0	0	0	1	1	0.976017	0	0	0	0.93278	0	0	0.067041	0	0.0873075	0	0	0	0.442301	0	0	1	1	0	0	0.108977	0	0	0	1	1	0	0	0.444574	0	0	0.555397
TCGA-29-1770-02	OV	0	0	0	0.226219	0.168422	0	0	0	0	0	0.00234525	0	0	0	1	1	0.975264	0	0	0	0.93278	0	0	0.067041	0	0	0	0	0	0.442318	0	0	1	1	0	0	0.108977	0	0	0	0	0	0	0	0	0	0	0.555426
TCGA-29-1771-01	OV	0.171813	0	0	0.257124	0.822715	0	0	0	0	0	0	0	0	0	0	0	0	0	0	0	0	0	0	5.18e-05	0	0	0	0	0	0	0	0	0	0	0	0	0	0	0	0	0	0.750605	0	0	0	0	0	0.752194
TCGA-29-1774-01	OV	0	0	0	0	1	1	0	0	1	1	0	0	0.0321191	0	0	0.967881	0	0	0	0	0	0	0	0	0	0.0148591	0	0	0	0	0	0	1	1	0	0	0	0	0	0	1	1	0	0	1	1	0	0
TCGA-29-1775-01	OV	0.0535633	0.353059	0	0	1	1	0	0	1	1	0	0	0.999913	0	0	0	0.0576017	0	0	0	1	1	0	0	1	1	0	0	0.256596	0	0	0	0	0	0	0	0	0	0	0.966391	0.0527577	0	0	0.0409146	0.22642	0	0	0.773494
TCGA-29-1776-01	OV	0	0	0	0.217518	0	0	0	0	0	0	0	0	0	0.0599566	0	0	0	0	0	0	0	0	0	0	0	0	0	0	0	0	0	0.748362	0	0	0	0	0	0.406764	0	0	0	0	0	0	0	0	0	0.310109
TCGA-29-1777-01	OV	1	1	0	0	0.810768	0	0	0.189226	0	0	0	0	0	0.0147092	0	0	0.391875	0	0	0.740295	1	1	0	0	0.0614474	0	0	0.938317	0.054733	0	0	0.945243	0	0.452305	0	0	0	0.301669	0.475964	0	0	0.104229	0	0	0	0	0	0.392741
TCGA-29-1778-01	OV	0	0	0.585914	0	0	0.954942	0.045057	0	1	1	0	0	0.0548988	0	0	0	1	1	0	0	1	1	0	0	0.0415899	0	0	0.958409	0.0264525	0	0	0	0	0	0	0	0	0	1	1	0	0.770128	0	0	0	0	0	0
TCGA-29-1781-01	OV	1	1	0	0	1	1	0	0	1	1	0	0	0.974996	0	0	0.100059	1	1	0	0	1	1	0	0	0	0	1	1	0	0	1	1	1	1	0	0	1	1	0	0	0.376695	0	0	0.62324	0.263457	0	0	0.970996
TCGA-29-1783-01	OV	0.726727	0	0	0	1	1	0	0	0	0	0	0	0	0	0	0	0.197119	0	0	0.0852889	1	1	0	0	0	0	1	1	0	0	1	1	0	0	1	1	0	0	1	1	0	0	0	0	0	0	0	0
TCGA-29-1784-01	OV	0.920561	0	0	0.0794272	0.306803	0	0	0	1	1	0	0	0.0316883	0	0	0.335871	0	0	0	0.142809	0	0.765725	0	0	0	0	0.190137	0	0	0	1	1	0	0.952644	0	0	0	0	0	0	0	0	0	0.0971205	0	0	0	0.703992
TCGA-29-1785-01	OV	0	0.091344	0	0	0	0.10952	0	0	0	0	0	0	0	0	0	0	0	0	0	0	0	0	0	0.104838	0	0	0	0	0	0	0	0	0	0	0	0.0424734	0	0	0	0.184579	0	0	0	0	0	0	0	0.506457
TCGA-29-2425-01	OV	1	1	0	0	1	1	0	0	0	0.31076	0	0	0	0	0	0	0	0	0	0	0	0.649174	0	0	0	0	0	0	0	0	0	0.266817	1	1	0	0	0.00138786	0	0	0	1	1	0	0	0.44062	0	0	0.527123
TCGA-29-2427-01	OV	0.770875	0	0	0.229102	1	1	0	0	0	0	0	0	0	0	0	0	0	0.362288	0	0	0	0.790421	0	0	0	0	0	0	0	0	0	0	0	0	0	0	0	0	0	0	1	1	0	0	0.0527684	0	0	0.551679
TCGA-29-2428-01	OV	0.0614257	0	0	0	0.06456	0	0	0	0	0	0	0	0	0	0	0	0.493727	0	0	0	1	1	0	0	0	0	1	1	0	0	1	1	1	1	0	0	0	0	1	1	0	0	1	1	0	0	1	1
TCGA-29-2429-01	OV	0	0	0	0.342102	0	0	0	0	0.942118	0	0	0	0.872145	0	0	0	0	0	0.0147233	0.20289	0	0.960079	0.0534845	0	0	0.0289426	0.495564	0	0	0	0.0635534	0.13872	0	0	0	0.0659283	0	0	0	0.0847068	0	0.590992	0	0	0	0	0	0.0238244
TCGA-29-2431-01	OV	0.0215282	0.398891	0	0	0.427096	0	0	0	0	0	1	1	0	0	0	0	0.0232968	0	0	0	1	1	0	0	0	0.0423721	0	0	0	0	0	0	0	0	0	0	0.00626666	0	0	0	0	0	0	0	0	0	0	0
TCGA-29-2432-01	OV	0	0.749806	0	0	1	1	0	0	0	0	0	0.13804	0	0	0	0	0	0	0	0	0	0.891868	0	0	0	0	0	0.899125	0	0.223725	0	0	1	1	0	0	1	1	0	0	1	1	0	0	0	0	0	0.991169
TCGA-29-2434-01	OV	0.00741239	0	0	0	1	1	0	0	0	0	0.0768382	0.11792	0	0	0.415658	0	1	1	0	0	1	1	0	0	0	0	0	0	0	0	0	0.733693	0	0	0.117959	0.286268	0	0.0624088	0	0	0.0799702	0	0	0	0	0	1	1
TCGA-29-2436-01	OV	0	0	0	0.283387	0	0	0	0	0	0	0	0	0	0	0	0	0	0	0	0	0	0	0	0	0	0	0	0	0	0	0	0	0	0	0	0	0	0.000780555	0	0	0	0	0	0	0	0	0	0
TCGA-29-A5NZ-01	OV	0	0	0	0	0.943157	0	0	0	0	0	0	0	0	0	0	0	0	0	0	0	1	1	0	0	0	0	0	0	0	0	0	0	0	0	0	0	0	0	0	0	1	1	0	0	0.0393918	0	0	0
TCGA-2A-A8VL-01	PRAD	0	0	0	0	0	0	0	0	0	0	0	0	0	0	0	0	0	0	0	0.0945547	0	0	0	0.229973	0	0	0	0	0	0	0	0	0	0	0	0	0	0	0	0	0	0	0	0	0	0	0	0
TCGA-2A-A8VO-01	PRAD	0	0	0	0	0	0	0	0	0	0	0	0	0	0	0	0	0	0	0	0	0	0	0	0	0	0	0	0	0	0	0	0	0	0	0	0	0	0	0	0	0	0	0	0	0	0	0	0
TCGA-2A-A8VT-01	PRAD	0	0	0	0	0	0	0	0	0	0	0	0	0	0	0	0	0	0	0	0	0	0	0	0	0	0	0	0	0	0	0	0.0491292	0	0	0	0	0	0	0	0	0	0	1	1	0	0	1	1
TCGA-2A-A8VV-01	PRAD	0	0	0	0	0	0	0	0	0	0	0	0	0	0	0	0	0	0	0	0	0	0	0	0	0	0	0	0	0	0	0	0	0	0	0	0	0	0	0	0	0	0	0	0	0	0	0	0
TCGA-2A-A8VX-01	PRAD	0	0	0	0	0	0	0	0	0	0	0	0	0	0	0	0	0	0	0	0	0	0	0	0	0	0	0	0	0	0	0	0	0	0	0	0	0	0	0	0	0	0	0	0	0	0	0	0
TCGA-2A-A8W1-01	PRAD	0	0	0	0	0	0	0	0	0	0	0	0	0	0	0	0	0	0	0	0	0	0	0	0	0	0	0	0	0	0	0	0	0	0	0	0	0	0	0	0	0	0	0	0	0	0	0	0
TCGA-2A-A8W3-01	PRAD	0	0	0	0	0	0	0	0	0	0	0	0	0	0	0	0	0	0	0	0	0	0	0	0	0	0	0	0	0	0	0	0	0	0	0	0	0	0	0	0	0	0	0	0	0	0	0	0
TCGA-2A-AAYF-01	PRAD	0	0	0	0	0	0	0	0	0	0	0	0	0	0	0	0	0	0	0	0	0	0	0	0	0	0	0	0	0	0	0	0	0	0	0	0	0	0	0	0	0	0	0	0	0	0	0	0
TCGA-2A-AAYO-01	PRAD	0	0	0	0	0	0	0	0	0	0	0	0	0	0	0	0	0	0	0	0	0	0	0	0	0	0	0	0	0	0	0	0	0	0	0	0	0	0	0	0	0	0	0	0	0	0	0	0
TCGA-2A-AAYU-01	PRAD	0	0	0	0	0	0	0	0	0	0	0	0	0	0	0	0	0	0	0	0	0	0	0	0	0	0	0	0	0	0	0	0	0	0	0	0	0	0	0	0	0	0	0	0	0	0	0	0
TCGA-2E-A9G8-01	UCEC	0	0	0	0	0	0	0	0	0	0	0	0	0	0	0	0	0	0	0	0.99931	0	0.414176	0	0	0	0	0	0	0	0	0	0	0	0	0	0	0	0	0	0	0	0	0	0	0	0	0	0
TCGA-2F-A9KO-01	BLCA	0.0535977	0	0	0	1	1	0	0	0	0	0	0	0	0	0	0	0	0	0.483568	0	0	0	0	0	0	0	0	0	0	0.494956	0	0	0	0	0	0	0	0	0.0957334	0	0	0	0	0	0	0	0	0
TCGA-2F-A9KP-01	BLCA	0	0.415579	0	0	0	0	0	0	0	0	0	0	0	0	0	0.294158	0	0.44236	0	0	0	0	0	0	0	0	0	0	0	0	0	0	0	0	2.65e-05	0	0	0	1	1	0	0	0	0	0	0	0	0
TCGA-2F-A9KQ-01	BLCA	0	0	0	0	0	0	0	0	0	0	0	0	0	0	1	1	0	0	0	0	0	0	0	0	0	0	0	0	0	0	0	0	0	0	0	0	0	0	0	0	0	0	0	0	0	0	0	0
TCGA-2F-A9KR-01	BLCA	0	0	0	0	0	0.86189	0	0	1	1	0	0	0.260672	0.19821	0	0	0	0	0	0	0	0.588557	0	0	1	1	0	0	0.287881	0	0	0	1	1	0	0	0.0643142	0.437578	0	0	1	1	0	0	0.348407	0	0	0.651452
TCGA-2F-A9KT-01	BLCA	0	0	0	0	0	0	0	0	0	0	0	0	0	0	0	0.298023	0	0	0	0	0	0	0	0	0	0	0	0	0	0	0	0	1	1	0	0	0.00802724	0	0	0.991934	0	0	0	0	0	0	0	0
TCGA-2F-A9KW-01	BLCA	0	0	0	0.27902	0.0118168	0	0	0	0	0	0	0	0	0	0	0	0	0	0	0	0	0	0	0	0	0	0	0	0	0	0	0	0	0.32475	0	0	0	0.339879	0	0	0	0	0	0	0	0	0	0
TCGA-2G-AAEW-01	TGCT	0	0	0	0.999971	1	1	0	0	0	0	0	0	0	0	0	0	0	0	0	0	0	0	0	0	0	0	1	1	0	0	1	1	0	0	1	1	0	0	1	1	0	0	0	0	0	0	0	0
TCGA-2G-AAEX-01	TGCT	0	0	0	0	0	0.524808	0	0	0	0	0	0	0	0	0	0	0	0	0	0	0	0	0	0	0	0	0	0.937022	0	0	0	0.838257	0	0	0	0	0	0	0	0.964383	0	0	0	0	0	0	0	0
TCGA-2G-AAF1-01	TGCT	0	0	0	0	0	0	0	0	0	0	0	0	0	0	0	0	0	0	0	0	0	0	0	0	0	0	0	0	0	0	0	0	0	0	0	0	0	0	0	0	1	1	0	0	1	1	0	0
TCGA-2G-AAF4-01	TGCT	0.0096934	0	0	0.137863	1	1	0	0	1	1	0	0	1	1	0	0	1	1	0	0	1	1	0	0	0	0	1	1	0	0	1	1	0	0	1	1	0	0	1	1	0	0	0	0	0	0	0	0
TCGA-2G-AAF6-01	TGCT	0	0	1	1	0	0	0.000112208	0	0	0.855088	0	0	0	0	0	0	0	0	0	0.651301	0	0	0	0	0	0	1	1	0	0	1	1	0	0	1	1	0	0	1	1	0	0	0	0	0	0	0	0
TCGA-2G-AAF8-01	TGCT	0	0	0	0	0	0.999981	0	0	0	0.663615	0	0	0	0	0	0	0	0	0	0	0	0	0	0	0	0	0	0.671328	0	0	0	0.810764	0	0	1	1	0	0	1	1	0	0	0	0	0	0	0	0
TCGA-2G-AAFG-01	TGCT	0	0	0	0	0	0	0	0	0.733491	0	0	0.266425	0.399703	0	0	0	0	0	0	0	0	0	0	0	0	0	1	1	0	0	1	1	0	0	1	1	0	0	1	1	0	0	0	0	0	0	0	0
TCGA-2G-AAFG-05	TGCT	0	0	0	0	0	0	0	0	0	0	0	0.267196	0	0	0	0	0	0	0	0	0	0	0	0	0	0	1	1	0	0	1	1	0	0	1	1	0	0	1	1	0	0	0	0	0	0	0	0
TCGA-2G-AAFH-01	TGCT	0.027531	0	0	0	1	1	0	0	0	0	0	0	0	0.539943	0.460051	0	0	0	0	0	0	0	0	0	0	0	1	1	0	0	1	1	0	0	1	1	0	0	1	1	0	0	0	0	0	0	0	0
TCGA-2G-AAFI-01	TGCT	0	0.0811519	0	0	0	0	0	0	0	0	0	0	0	0	0	0	0	0	1	1	0	0	0.000887047	5.18e-05	0	0	1	1	0	0	1	1	0	0	1	1	0	0	1	1	0	0	1	1	0	0	1	1
TCGA-2G-AAFJ-01	TGCT	0	0	0	0	0	0	0	0	0	0.485363	0.513764	0	0	0	0	0	0.448486	0	0	0	0.126934	0	0	0.873019	0	0	1	1	0	0	1	1	0	0	1	1	0	0	1	1	0	0	0	0	0	0	0	0
TCGA-2G-AAFL-01	TGCT	0	0	0	0	0	0	0	0	0	0	1	1	0	0	0.025219	0	0	0	1	1	0	0	1	1	0	0	1	1	0	0	1	1	0	0	0	0	0	0	0	0	0	0	0	0	0	0	0	0
TCGA-2G-AAFM-01	TGCT	0.741788	0	0	0	1	1	0	0	0	0	0	0	0	0	0	0	0	0	0	0	0	0	0	0	0	0	1	1	0	0	1	1	0	0	0	0	0	0	0	0	0	0	0	0	0	0	0	0
TCGA-2G-AAFN-01	TGCT	1	1	0	0	1	1	0	0	0	0	0	0	0	0	0	0	0	0	0	0	0	0	0	0	0	0	0	0	0	0	0	0.81446	0	0	0	0	0	0	0	0	0	0	0	0	0	0	0	0
TCGA-2G-AAFO-01	TGCT	1	1	0	0	1	1	0	0	1	1	0	0	0.327416	0	0	0	0	0	0	0	0	0.735462	0	0	0	0	1	1	0.0956961	0	0	0.904304	0	0	1	1	0	0	1	1	0	0	0	0	0	0	0	0
TCGA-2G-AAFV-01	TGCT	0	0	1	1	0	0.999981	0	0	1	1	0	0	1	1	0	0	1	1	0	0	1	1	0	0	0	0	1	1	0	0	1	1	0	0	1	1	0	0	1	1	0	0.228756	0.771092	0	0	0	1	1
TCGA-2G-AAFY-01	TGCT	0.751073	0	0	0	1	1	0	0	0	0	0	0	0	0	0	0	0	0	0	0	0	0	0	0	0	0	1	1	0	0	1	1	0	0	1	1	0	0	1	1	0	0	0	0	0	0	0	0
TCGA-2G-AAFZ-01	TGCT	0	0	0	0	0	0	0	0	0	0.63555	0.364403	0	0	0	1	1	1	1	0	0	1	1	0	0	0	0	1	1	0	0	1	1	0	0	0	0	0	0	0	0	0	0	1	1	0	0	1	1
TCGA-2G-AAG0-01	TGCT	1	1	0	0	1	1	0	0	0	0	0	0	0	0	0	0	0	0	0	0.535244	0	0	0	0	0	0	0	0	0	0	0	0.909816	0.63892	0	0	0.360825	0.251121	0	0	0	0	0	0	0	0	0	0	0
TCGA-2G-AAG3-01	TGCT	0.00782062	0	0	0.99206	0	0.999981	0	0	0	0	0	0	0	0	0	0	0	0	1	1	0	0	1	1	0	0	1	1	0	0	1	1	0	0	1	1	0	0	1	1	1	1	0	0	0.215138	0	0	0.784854
TCGA-2G-AAG5-01	TGCT	0	0	0	0	0	0	0	0	0	0	0	0	0	0	0	0	0	0	0	0	0	0	0	0	0	0	0	0	0	0	0	0	0	0	0	0	0	0	0	0	0	0.537301	0	0	0	0	0	0
TCGA-2G-AAG6-01	TGCT	0.00400959	0	0	0.995985	1	1	0	0	0	0	0	0	0	0	0	0	0	0	0	0	0	0	0	0	1	1	0	0	0.0806099	0	0	0.919384	0	0	1	1	0	0	1	1	0.041527	0	0	0	1	1	0	0
TCGA-2G-AAG7-01	TGCT	1	1	0	0	1	1	0	0	1	1	0	0	0.201727	0	0	0	1	1	0	0	0.731725	0	0	0	0	0	1	1	0	0	1	1	0	0	1	1	0	0	1	1	0.693126	0	0	0	0.606366	0	0	0
TCGA-2G-AAG8-01	TGCT	0	0	0	0	0	0	0	0	0	0	0	0	0	0	0	0	0	0	1	1	0	0	8.92e-05	0	0	0	0	0	0	0	0	0	0	0	0	0	0	0	0	0	0	0	0	0	0	0	0	0
TCGA-2G-AAG9-01	TGCT	0	0	0	0	0	0	0	0	0	0	0	0	0	0	0	0	0	0	1	1	0	0	1	1	0	0	1	1	0	0	1	1	0	0	1	1	0	0	0.336789	0	0	0	0	0	0	0	0	0
TCGA-2G-AAGA-01	TGCT	1	1	0	0	0	0	0	0	0	0	0	0	0	0	0	0	0	0	0	0.0991635	0	0.618492	0	0	0	0	1	1	0	0	1	1	0	0	1	1	0	0	0.403495	0	0	0	0	0	0	0	0	0
TCGA-2G-AAGC-01	TGCT	0	0	0	0	0	0	0	0	0	0	0	0	0	0	0	0	0	0.0883557	0	0	0	0	0	0	0	0	0	0	0	0	0	0	0	0	1	1	0	0	0.401916	0	0	0	0	0	0	0	0	0
TCGA-2G-AAGE-01	TGCT	0	0	0	0	0	0	0	0	0	0	0	0	0	0	0	0	0	0	1	1	0	0	1	1	0	0	1	1	0	0	1	1	0	0	1	1	0	0	1	1	0	0	0	0	0	0	0	0
TCGA-2G-AAGF-01	TGCT	0	0.999819	0	0	0	0	0	0	0	0	0	0	0	0	0	0	1	1	0	0	1	1	0	0	0	0	1	1	0	0	1	1	0	0	1	1	0	0	1	1	0	0	0	0	0	0	0	0
TCGA-2G-AAGG-01	TGCT	0	0.39438	0.6056	0	1	1	0	0	0	0	0	0	0	0	0	0	0	0	0	0.0239833	0	0	0	0	0	0	1	1	0	0	1	1	0	0	0	0	0	0	0	0	0	0	0	0	0	0	0	0
TCGA-2G-AAGI-01	TGCT	0	0	1	1	0	0.999981	0	0	1	1	0	0	1	1	0	0	1	1	0	0	1	1	0	0	0	0	1	1	0	0	1	1	0	0	1	1	0	0	1	1	1	1	0	0	0.170588	0	0	0.829383
TCGA-2G-AAGI-05	TGCT	0	0	0	0	0	0.0713582	0	0	0	0	0	0	0	0	0	0	0	0	0	0	0	0	0	0	0	0	0	0	0.17895	0	0	0.82101	0	0	1	1	0	0	1	1	0	0	0	0	0	0	0	0
TCGA-2G-AAGJ-01	TGCT	0	0.290349	0	0	0	0	0	0	1	1	0	0	0.163732	0	0	0.250068	0	0	1	1	0	0.69741	0.302539	0	0	0	1	1	0	0	1	1	0	0	1	1	0	0	1	1	0	0	0	0	0	0	0	0
TCGA-2G-AAGK-01	TGCT	1	1	0	0	1	1	0	0	1	1	0	0	0.748184	0	0	0.251792	1	1	0	0	1	1	0	0	0	0	1	1	0	0	1	1	0	0	1	1	0	0	1	1	0	0	1	1	0	0	1	1
TCGA-2G-AAGM-01	TGCT	0	0	0	0	0	0	0	0	1	1	0	0	0	0	0	0	0	0	0	0	0	0	0	0	0	0	0	0	0	0	0	0	0	0	0	0	0	0	0	0	0	0	0	0.731684	0	0	0	0
TCGA-2G-AAGN-01	TGCT	0	0	0	0	0	0	0	0	0	0	0	0	0	0	0	0	0	0	0	0.845952	0	0	0	0	0	0	1	1	0	0	1	1	0	0	0	0	0	0	0	0	0	0	0	0	0	0	0	0
TCGA-2G-AAGO-01	TGCT	0	0.176532	0	0	0	0	0	0	0	0	0	0	0	0	0	0	0	0	1	1	0	0	1	1	0	0	0	0	0	0	0	0.834471	0	0.278331	0	0	0	0	0	0	0	0	0	0	0	0	0	0
TCGA-2G-AAGP-01	TGCT	0.797587	0	0	0.202389	0.826318	0	0	0.173667	0.856646	0	0	0.143301	1	1	0	0	0	0	0	0	0	0.399043	0	0	0	0	1	1	0	0	1	1	0	0	1	1	0	0	1	1	1	1	0	0	0.645635	0	0	0.354342
TCGA-2G-AAGS-01	TGCT	0	0	0	0	0	0	0	0	0	0	0	0	0	0.060727	0	0	0	0	0	0	0	0	0	0	0	0	0	0	0	0	0	0.990231	0	0	0	0	0	0	0	0	0	0	0	0	0	0	0	0
TCGA-2G-AAGT-01	TGCT	0	0	0	0	0	0	0	0	1	1	0	0	0.217837	0	0	0.0855173	1	1	0	0	0.19902	0	0	0	0	0.113651	0.886346	0	0	0	1	1	0	0	1	1	0	0	1	1	0	0	0	0.999997	1	1	0	0
TCGA-2G-AAGV-01	TGCT	0	0	0	0.0475894	0	0	0	0	0	0	0	0	0	0	0	0	0	0	0	0	0	0	0	0	0	0	1	1	0	0	1	1	0	0	1	1	0	0	1	1	0	0	0	0	0	0	0	0
TCGA-2G-AAGW-01	TGCT	0	0	0	0.182125	0	0	0	0	0	0	0	0	0	0	0	0	0	0.0927745	0	0	0	0	0	0	0	0	0	0.220456	0	0	0	0.892465	0	0	0	0	0	0	0	0	0.396922	0	0	0	0	0	0	0
TCGA-2G-AAGX-01	TGCT	0	0	0	0	0	0	0	0	0	0	0	0	0	0	0	0	0	0	0	0	0	0	0	0	0	0	0	0	0	0	0	0	0	0	0.658665	0	0	0	1	1	0	0	0	0	0	0	0	0
TCGA-2G-AAGY-01	TGCT	0.0385053	0	0	0	1	1	0	0	0	0	0	0	0	0	0	0	0	0	0	0	0	0.941201	0	0	0	0	0	0	0	0	0	0	0	0	1	1	0	0	1	1	0.366864	0	0	0	1	1	0	0
TCGA-2G-AAGY-05	TGCT	0	0.12029	0	0	0	0	0	0	0	0	0	0.130164	0	0	0	0.140594	0	0	0	0	0	0.770984	0	0	0	0	1	1	0	0	1	1	0	0	0.397996	0	0	0	1	1	0	0	0	0	0	0	0	0
TCGA-2G-AAGZ-01	TGCT	0	0	0	0	0	0	0	0	0	0.795686	0	0	0	0	0	0	0	0	0	0	0	0	0	0	0	0	1	1	0	0	1	1	0	0	1	1	0	0	1	1	0	0.973927	0.0260641	0	0	0	1	1
TCGA-2G-AAH0-01	TGCT	0	0	0	0.825052	0	0	0	0	0	0	0	0.106785	0	0	0	0	0	0	0	0	0	0	0	0	0	0	1	1	0	0	1	1	0	0	0	0	0	0	0	0	0	0	0	0	0	0	0	0
TCGA-2G-AAH2-01	TGCT	0	0	0	0.981017	0	0	0	0	1	1	0	0	0	0	1	1	0	0	1	1	0	0	1	1	0	0	1	1	0	0	1	1	0	0	1	1	0	0	1	1	0	0	0	0	0	0	0	0
TCGA-2G-AAH3-01	TGCT	0	0	0	0	0	0	0	0	0	0	0	0	0	0	0	0	0	0	1	1	0	0	1	1	0	0	1	1	0	0	1	1	0	0	1	1	0	0	1	1	0	0	0	0	0	0	0	0
TCGA-2G-AAH4-01	TGCT	0	0.00123457	0	0	0	0	0	0	0	0	0	0	0	0	0	0.887368	0	0	0	0	0	0	0	0	0	0	1	1	0	0	1	1	0	0	0.544872	0	0	0	0	0.960977	0	0	0	0	0	0	0	0.14894
TCGA-2G-AAH8-01	TGCT	0.145239	0.0946543	0	0	1	1	0	0	0	0	0	0	0	0	0	0	0	0	0	0	0	0	0	0	0	0	1	1	0	0	1	1	0	0	0	0	0	0	0	0	0.433111	0	0	0	0.614682	0	0	0
TCGA-2G-AAHA-01	TGCT	0	0	1	1	0	0.999981	0	0	0	0	1	1	0	0.999884	6.33e-05	0	0	0	0	0	0	0	0	0.397603	0	0	1	1	0	0	1	1	0	0	1	1	0	0	1	1	1	1	0	0	1	1	0	0
TCGA-2G-AAHC-01	TGCT	0	0	0	0.59492	0	0	0	0	0	0	0	0	0	0.517007	0	0	0	0	1	1	0	0	1	1	0	0	1	1	0	0	1	1	0	0	1	1	0	0	1	1	0	0	0	0	0	0	0	0
TCGA-2G-AAHG-01	TGCT	0	0	0	0	0	0.999945	0	0	0.00541192	0	0	0	1	1	0	0	0	0.942922	0.057016	0	0	0	1	1	0	0	1	1	0	0	1	1	0	0	1	1	0	0	1	1	0.393688	0	0	0	0	0	0	0.788255
TCGA-2G-AAHL-01	TGCT	0	0	0	0	0	0	0	0	0	0	0	0	0	0.999964	0	0	0	0	1	1	0	0	1	1	0	0	1	1	0.0419567	0	0	0.958038	0	0	1	1	0	0	1	1	0	0	0	0	0	0	0	0
TCGA-2G-AAHN-01	TGCT	0	0	0	0	0	0.552169	0	0	0	0	0	0	0	0.588032	0	0	0	0	1	1	0	0	1	1	0	0	0	0	0	0.287672	0	0	0	0	1	1	0	0	1	1	1	1	0	0	0.380916	0	0	0
TCGA-2G-AAHP-01	TGCT	0	0	0	0.999971	0	0	0	0	0	0.563815	0	0	0	0	0	0	0	0	0	0	0	0	0	0	0	0	1	1	0	0	1	1	0	0	1	1	0	0	1	1	0	0	0	0	0	0	0	0
TCGA-2G-AAHP-05	TGCT	0.0140137	0	0	0.00312645	1	1	0	0	0	0	0	0	0	0.928488	0	0	0	0	0	0	0	0	0	0	0	0	0	0	0	0	0	0.588493	0	0	0.00162456	0.287255	0	0	1	1	1	1	0	0	1	1	0	0
TCGA-2G-AAHT-01	TGCT	1	1	0	0	0.999965	0	0	0	0.0381309	0	0	0	0.773365	0	0	0	0	0	0	0	0	0	0	0	0	0	0.00556315	0.238297	0	0	1	1	0	0	1	1	0	0	1	1	0	0	0	0	0	0	0	0
TCGA-2G-AAKD-01	TGCT	0	0	0	0	0	0	0	0	0	0	0.758208	0	0	0	0	0	0.109196	0	0	0.890791	1	1	0	0	0	0	0.619622	0	0.034171	0.111018	0	0	0	0	1	1	0	0	6.83e-05	0	0	0	0	0	0	0	0	0
TCGA-2G-AAKG-01	TGCT	0	0.999971	0	0	0	0	0	0	0	0	0.237376	0	0	0	0	0	1	1	0	0	1	1	0	0	0	0	1	1	0	0	1	1	0	0	1	1	0	0	1	1	0	0	0	0	0	0	0	0
TCGA-2G-AAKG-05	TGCT	0.700925	0	0	0	1	1	0	0	1	1	0	0	1	1	0	0	0	0	0	0	0	0	0	0	0	0	0.86348	0	0	0	1	1	0	0	1	1	0	0	1	1	0	0	0	0	0	0	0	0
TCGA-2G-AAKH-01	TGCT	0	0.973834	0	0	0	0	0	0	0	0	0	0	0	0	0	0	0	0.89276	0	0	0	0	0	0	0	0	1	1	0	0	1	1	1	1	0	0	6.52e-05	0	0	0	1	1	0	0	0	0	0	0
TCGA-2G-AAKL-01	TGCT	0	0	0	0	0	0	0	0	0	0	0	0	0	0	0	0	0	0	1	1	0	0.942911	0.0570513	0	0	0	1	1	0	0	1	1	0	0	1	1	0	0	1	1	1	1	0	0	0.113886	0	0	0.88611
TCGA-2G-AAKM-01	TGCT	0.757846	0	0	0	0.593119	0	0	0	0	0	0	0	0	0	0	0	0	0	0	0	0	0	0	0	0	0	1	1	0	0	1	1	0	0	0	0.401497	0	0	0	0	0	0	0	0	0	0	0	0
TCGA-2G-AAKO-01	TGCT	0	0	1	1	0	0	1	1	0	0	0	0	0	0	0	0	0	0	0	0	0	0	0	0	0	0	1	1	0	0	0.53475	0	0	0	1	1	0	0	1	1	0	0	0	0	0	0	0	0
TCGA-2G-AAKO-05	TGCT	0	0	0	0	0	0	0	0	0	0	0	0	0	0	0	0	0	0	0	0	0	0	0	0	0	0	0	0	0	0	0	0	0	0	0	0	0	0	0	0	0	0	0	0	0	0	0	0
TCGA-2G-AAL5-01	TGCT	0.732476	0	0	0	1	1	0	0	0	0	0	0	0	0	0	0	0	0	0	0	0	0	0	0	0	0	1	1	0	0	1	1	0	0	1	1	0	0	1	1	0	0	0	0	0	0	0	0
TCGA-2G-AAL7-01	TGCT	0	0	0	0	0	0	0	0	0	0	0	0	0	0	0	0	0	0	0	0	0	0	0	0	0	0	1	1	0	0	1	1	0	0	0	0	0	0	0	0	0	0	0	0	0	0	0	0
TCGA-2G-AALF-01	TGCT	0	0	0	0	0	0.815963	0	0	1	1	0	0	0.0251329	0	0	0	1	1	0	0	0.994549	0	0	0.00543808	0	0	0	0	0	0	0	0	0	0	0	0.238112	0	0	0	0	0	0	1	1	0	0	1	1
TCGA-2G-AALG-01	TGCT	0.758764	0	0	0.241209	1	1	0	0	1	1	0	0	0.321066	0	0	0.678929	0	0	0	0	0	0	0	0	0	0	1	1	0	0	1	1	0	0	1	1	0	0	1	1	1	1	0	0	0.110032	0	0	0.889913
TCGA-2G-AALN-01	TGCT	0	0	0	0.115037	0	0.419552	0	0	0	0.5412	0	0	0	0	0	0	0	0.874129	0	0	0	0.500048	0	0	0	0	1	1	0	0	0.934884	0	0	0	1	1	0	0	1	1	0	0	0	0	0	0	0	0
TCGA-2G-AALO-01	TGCT	0.815994	0	0	0.183936	1	1	0	0	1	1	0	0	1	1	0	0	0	0	1	1	0	0	1	1	0	0	1	1	0	0	1	1	0	0	1	1	0	0	1	1	1	1	0	0	1	1	0	0
TCGA-2G-AALP-01	TGCT	1	1	0	0	1	1	0	0	1	1	0	0	0.0396982	0	0	0	0	0	0	0.526423	0	0	0	0	0	0	1	1	0	0	1	1	0	0	1	1	0	0	1	1	0.744738	0	0	0	0.39064	0	0	0.609346
TCGA-2G-AALQ-01	TGCT	1	1	0	0	1	1	0	0	0	0.578627	0.421354	0	0	0.99986	0.000137215	0	0.965999	0	0	0.0339792	1	1	0	0	1	1	0	0	0	0	0	0.821379	0	0	1	1	0	0	1	1	0	0	1	1	0	0	1	1
TCGA-2G-AALR-01	TGCT	0.710953	0	0	0.28899	1	1	0	0	0	0	0	0	0	0	0	0	0.323894	0	0	0	1	1	0	0	0	0	1	1	0	0	1	1	0	0	1	1	0	0	1	1	1	1	0	0	0.0406164	0	0	0.959363
TCGA-2G-AALS-01	TGCT	0	0	0	0	0	0	0	0	0	0	0	0	0	0	0	0	0	0	0	0	0	0	0	0	0	0	1	1	0	0	1	1	0	0	1	1	0	0	1	1	0	0	0	0	0	0.327179	0	0
TCGA-2G-AALT-01	TGCT	0	0	0	0	0	0	0	0	0	0	0	0	0	0	0	0	0	0	0	0	0	0	0	0	0	0	0	0	0	0	0	0	0	0	1	1	0	0	1	1	0	0	0	0	0	0	0	0.264563
TCGA-2G-AALW-01	TGCT	0	0	0	0	0	0	0	0	1	1	0	0	1	1	0	0	1	1	0	0	1	1	0	0	0	0	1	1	0	0	1	1	0	0	0	0	0	0	0	0	0	0	0	0.260648	0	0	0	0
TCGA-2G-AALX-01	TGCT	0.601986	0	0	0.39801	1	1	0	0	0	0.901122	0.0988543	0	0	0	1	1	0	0	1	1	0	0.42065	0.579319	0	0	0	1	1	0	0	1	1	0	0	1	1	0	0	1	1	1	1	0	0	1	1	0	0
TCGA-2G-AALY-01	TGCT	0	0	0	0	0	0	0	0	0	0	0	0	0	0	0	0	0	0	0	0	0	0.190864	0	0	0	0	1	1	0	0	1	1	0	0	1	1	0	0	1	1	0	0	0	0	0	0	0	0
TCGA-2G-AALZ-01	TGCT	0	0	0	0	0	0	0	0	0	0	0	0	0	0	0	0	0	0	0	0	0	0.595583	0	0	0	0	1	1	0	0	1	1	0	0.0697057	0.930176	0	0	0	0.736985	0	0	0	0	0	0	0	0	0
TCGA-2G-AAM2-01	TGCT	0	0	0	0	0	0	0	0	0	0	0	0	0	0	0	0	0	0.875782	0	0	0	0	0	0	0	0	1	1	0	0	1	1	0	0	1	1	0	0	1	1	1	1	0	0	0.871177	0	0	0
TCGA-2G-AAM3-01	TGCT	0	0	0	0.242248	0	0.0216109	0	0	0	0	0	0	0	0	0	0	0	0	0	0	0	0	0	0	0	0	1	1	0	0	1	1	0	0	1	1	0	0	1	1	0	0	0	0	0	0.363316	0	0
TCGA-2G-AAM4-01	TGCT	0	0	1	1	0	0.999981	0	0	1	1	0	0	0.0758446	0	0	0.924137	0	0	1	1	0	0	1	1	0	0	1	1	0	0	1	1	0	0	1	1	0	0	1	1	1	1	0	0	1	1	0	0
TCGA-2H-A9GF-01	ESCA	0	0	0	0	0	0.275189	0	0	0	0	0	0	0	0	0	0.14062	0.14902	0	0	0	0	0	0	0	0	0.040962	0.958971	0	0	0	1	1	0	0	0	0	0.0111967	0	0	0	0	0.960368	0.0396162	0	0	0	1	1
TCGA-2H-A9GH-01	ESCA	0.127441	0	0	0.541737	1	1	0	0	0	0	0	0.611966	0	0	0	0	0.0902124	0	0	0	1	1	0	0	0	0	0	0	0	0	0	0	0	0	0	0	0	0	0	0	0	0	0	0	0	0.585505	0	0
TCGA-2H-A9GI-01	ESCA	0	0	1	1	1	1	0	0	0	0	0	0	0	0	0	0	0	0	1	1	0	0	0	0.230307	0	0	1	1	0	0	1	1	1	1	0	0	0	0	0.705818	0	1	1	0	0	1	1	0	0
TCGA-2H-A9GJ-01	ESCA	0.0586043	0	0	0	0	0	0	0	0	0	0	0	0	0	0	0	0	0	0	0	1	1	0	0	0	0	1	1	0	0	0.0706676	0	0	0	1	1	0	0	0.183865	0	0	0	0	0.481824	0	0	0	0
TCGA-2H-A9GK-01	ESCA	0.00439782	0	0	0	0.0472654	0	0	0	0	0	0	0	0	0	0	0	0.0247913	0	0	0	1	1	0	0	0	0	0	0	0	0	0	0	0	0	1	1	0	0	0.330055	0.177548	0.36486	0	0	0.635081	1	1	0	0
TCGA-2H-A9GL-01	ESCA	0	0	0	0	0	0	0	0	0	0	0	0.583954	0	0.11754	0	0	0	0	0	0.0167664	0	0.335363	0	0	0	0	1	1	0	0	1	1	1	1	0	0	0.0329147	0	0	0	0	0	0	0	0	0.0716089	0	0
TCGA-2H-A9GM-01	ESCA	0	0	0	0	1	1	0	0	0.404179	0	0	0.0738355	0.851936	0	0	0.148049	0	0	0	0	0	0	0	0	0	0	1	1	0.134395	0	0	0	0	0	0	0.999974	0	0	0.778211	0	0	0	0	0.681924	0	0	0	0
TCGA-2H-A9GN-01	ESCA	0	0	0	0	0	0.983497	0	0	1	1	0	0	1	1	0	0	0.317796	0	0	0.682203	0.265265	0	0	0	0	0	1	1	0	0	1	1	0	0	1	1	0	0	0.686446	0	0	0	0	0	0	0	0	0
TCGA-2H-A9GO-01	ESCA	0.137898	0	0	0.862101	0.170989	0	0	0	0	0	0	0	0	0	0	0	0	0	1	1	1	1	0	0	0	0	1	1	0	0	1	1	0.179114	0	0	0	0	0	1	1	0	0	0	0	0	0.418558	0	0
TCGA-2H-A9GQ-01	ESCA	0	0	0.104815	0	0	0	0	0	0	0.82084	0.179081	0	0	0	0	0	0	0	1	1	0	0	1	1	0	0	1	1	0	0	1	1	0	0	0	0	0	0	1	1	1	1	0	0	0.0330126	0	0	0.00247952
TCGA-2H-A9GR-01	ESCA	0	0	0	0.967681	0	0	0	0.0862793	0	0	0	0	0	0	0	0	0	0	0	0	0	0	0	0	0	0.340992	0.658867	0	0	0	1	1	1	1	0	0	0	0	0	0.819438	0	0	0	0	0	0	0	0
TCGA-2J-AAB1-01	PAAD	0	0	0	0	0	0	0	0	0	0	0	0	0	0	0	0	0	0	0	0	0	0	0	0	0	0	0	0	0	0	0	0	0	0	0	0	0	0	0	0	0	0	1	1	0	0	1	1
TCGA-2J-AAB4-01	PAAD	0	0	0	0	0	0	0	0	0	0	0	0.317582	0	0	0	0	0	0	0	0	0	0	0	0	0	0	0	0	0	0	0	0	0	0	0	0	0	0	0	0	0	0	0	0.703404	0	0	0	0
TCGA-2J-AAB6-01	PAAD	0	0	0	0	1	1	0	0	0	0	0	0	0	0	0	0	1	1	0	0	1	1	0	0	1	1	0	0	0.0559753	0	0	0	0.0744565	0	0	0	0	0	0	0	0	0	0	0	0	0	0	0
TCGA-2J-AAB8-01	PAAD	2.94948e-05	0	0	0	0.590379	0	0	0	0	0	0	0	0	0	0	0	0	0	0	0	0	0	0	0	0	0	0	0	0	0	0	0.267334	0	0	0	0	0	0	0	0	0	0	0	0	0	0	0	0
TCGA-2J-AAB9-01	PAAD	0	0	0	0	0	0	0	0	0	0	0	0	0	0	0	0	0	0	0	0	0	0	0	0	0	0	0	0	0	0	0	0	0	0	0	0	0	0	0	0	0	0	0	0	0	0	0	0
TCGA-2J-AABA-01	PAAD	0	0	0	0.237983	0	0	0	0	0	0	0	0	0	0	0	0	0	0	0	0	0	0	0	0	0	0	0	0	0	0	0	0	0	0	0	0	0	0	0	0	0	0	0	0.475088	0	0	0	0.833195
TCGA-2J-AABE-01	PAAD	0	0	0.239374	0	1	1	0	0	0	0	0	0	0	0.996529	0	0	0	0	0	0	0	0	0	0	0	0	0	0	0	0	0	0	0	0	0	0	0	0	0	0	0	0	0	0	0	0	0	0.986062
TCGA-2J-AABF-01	PAAD	0	0	0	0	0	0	0	0	0	0	0	0	0	0	0	0	0	0	0	0	0	0	0	0	0	0	0	0	0	0	0	0	0	0	0	0	0	0	0	0	0	0	0	0	0	0	0	0
TCGA-2J-AABH-01	PAAD	0	0	1	1	0	0.999981	0	0	0	0	0	0	0	0	0	0	0	0	0	0	0	0	0	0	0	0	0	0	0	0	0	0.131772	0	0	0	0	0	0	0	0	0	0	0	0.49345	0	0	0	0.904004
TCGA-2J-AABI-01	PAAD	0	0	0	0.999959	0	0	0	0	0	0	0	0	0	0	0	0	0	0	0	0.928507	0	0.152275	0	0	0	0	0	0	0	0	0	0	0	0	0	0	0	0	0	0	0	0	1	1	0	0	1	1
TCGA-2J-AABK-01	PAAD	0	0	0	0	0.371292	0	0	0	0	0	0	0	0	0	0	0	0	0	0	0	0	0	0	0	0	0	0	0	0	0	0	0	0	0	0	0	0	0	0	0	0	0	0	0	0	0	0	0
TCGA-2J-AABO-01	PAAD	0	0	0	0	0	0	0	0	0	0	0	0	0	0	0	0	0	0	0	0.949524	0	0	0	0	0	0	0	0	0	0	0	0	0	0	0	0	0	0	0	0	0	0	0	0	0	0	0	0.292881
TCGA-2J-AABP-01	PAAD	0	0.993379	0	0	0	0	0	0.175624	0	0	1	1	0	0	3.36e-05	0.396227	0	0	0	0	0	0	0	0	1	1	0	0	0.0630468	0	0	0.178588	0.97805	0	0	0	0	0	0.971347	0	0	0	0	0	0	0	0	0.000472856
TCGA-2J-AABR-01	PAAD	0	0	0	0	0	0	0	0	0	0	0	0	0	0	0	0	0	0	0	0	0	0	0	0	0	0	0	0	0	0	0	0	0	0	0	0	0	0	0	0	0	0	0	0	0	0	0	0
TCGA-2J-AABT-01	PAAD	0	0	0	0	0	0	0	0	0	0	0	0	0	0	0	0	0	0	0	0	0	0	0	0	0	0	0	0	0	0	0	0	0	0	0	0	0	0	0	0	0	0	0	0	0	0	0	0
TCGA-2J-AABU-01	PAAD	0	0	0	0	0	0	0	0	0	0.708212	0	0	0	0	0	0	0	0	0	0.94776	0	0	0	0	0	0	0	0	0	0	0	0	0	0.723632	0	0	0	0.0386064	0	0	0	0	1	1	0	0	1	1
TCGA-2J-AABV-01	PAAD	0	0	0	0	0	0	0	0	0	0	0	0	0	0	0	0	0	0	0	0	0	0	0	0	0	0	0	0	0	0	0	0	0	0	0	0	0	0	0	0	0	0	0	0	0	0	0	0
TCGA-2K-A9WE-01	KIRP	0	0	0	0	0	0	0	0	0	0	0	0	0	0	0	0	0	0	0	0	0	0	0	0	0	0	0	0	0	0	0	0	0	0	0	0	0	0	0	0	0	0	0	0	0	0	0	0
TCGA-2L-AAQA-01	PAAD	0	0	1	1	1	1	0	0	0	0	0	0	0	0	0	0	0	0	0	0	0	0	0	0	0.0263073	0	0	0	0	0	0	0	0	0	0	0	0	0	0	0	0	0	0	0.53373	0	0	0	0.874133
TCGA-2L-AAQE-01	PAAD	0	0	0	0	0	0	0	0	0	0	0	0	0	0	0	0	0	0	0	0	0	0	0	0	0	0	0	0	0	0	0	0	0	0	0	0	0	0	0	0	0	0	1	1	0	0	1	1
TCGA-2L-AAQI-01	PAAD	0	0	0	0	0	0	0	0	0	0	0	0	0	0	0	0	0	0	0	0	0	0	0	0	0	0	0	0	0	0	0	0	0	0	0	0	0	0	0	0	0	0	0	0	0	0	0	0
TCGA-2L-AAQJ-01	PAAD	0	0	0	0.291506	0	0	0	0	0	0	0	0	0	0	0	0	0	0	0	0.998965	0	0	0	0	0	0	0	0	0	0	0	0	0	0	0	0	0	0	0	0	0	0	0	0	0	0	0	0
TCGA-2L-AAQL-01	PAAD	0	0	0.909291	0	1	1	0	0	0	0	0	0	0	0	0	0	0	0	1	1	0	0	0	0	0	0	0	0	0	0	0	0	0	0	0	0	0	0	0	0	0	0	0	0	0	0	0	0
TCGA-2L-AAQM-01	PAAD	0	0	1	1	0	0	1	1	0	0	1	1	0	0	1	1	0	0	1	1	0	0	1	1	1	1	0	0	1	1	0	0	1	1	0	0	1	1	0	0	0	0	1	1	0	0	1	1
TCGA-2V-A95S-01	LIHC	0	0	0	0	1	1	0	0	0	0	0	0	0	0	0	0	0	0	0	0	0	0	0	0	0	0	0	0	0	0	0	0	0	0	0	0	0	0.241548	0	0	0	0	0	0	0	0	0	0
TCGA-2W-A8YY-01	CESC	0	0	0	0	0	0	0	0	0	0	0	0	0	0	0	0	0	0	0	0	0	0	0	0	0	0	0	0	0	0	0	0.804246	0	0	0	0	0	0.22641	0	0	0	0	0	0	0	0	0	0
TCGA-2X-A9D5-01	TGCT	0	0	0	0.973914	0	0	0	0	0	0	0	0	0	0	0	0	0	0	0	0	0	0	0	0	2.04e-05	0	0	0	0.0261118	0	0	0.97388	0	0	1	1	0	0	1	1	0	0	0	0	0	0	0	0
TCGA-2X-A9D6-01	TGCT	0	0	0	0	0	0	0	0	0	0	0	0	0	0	0	0	0	0	0	0	0	0	0	0	0	0	0	0	0	0	0	0	0	0	1	1	0	0	1	1	1	1	0	0	1	1	0	0
TCGA-2Y-A9GS-01	LIHC	0	0	0	0	0	0	0	0	0	0	0	0	0	0	0	0	0	0	0	0	0	0	0	0	0	0	1	1	0	0	1	1	0	0	0	0	0	0	0	0	0	0	0	0	0	0	0	0
TCGA-2Y-A9GT-01	LIHC	0	0	0	0	0	0	0	0	0	0	0	0	0	0	0	0	0	0	0	0	0	0	0	0	0	0	0	0	0	0	0	0	0	0	0	0	0	0	0	0	0	0	0	0	0	0	0	0
TCGA-2Y-A9GU-01	LIHC	0	0	0	0	1	1	0	0	1	1	0	0	0	0	1	1	0	0	0	0	0	0	0	0	0	0.999999	0	0	0	0	0	0	0	0	0	0	0	0	0	0	0	0	0	0	0	0	0	0
TCGA-2Y-A9GV-01	LIHC	0	0	0	0	0	0	0	0	0	0	0	0	0	0	0	0	0	0	0	0	0	0	0	0	0	0	0	0	0	0	0	0	0	0	0	0	0	0	0	0	0	0.999997	0	0	0	0	0	0
TCGA-2Y-A9GW-01	LIHC	0	0	0	0	1	1	0	0	0	0	0	0	0	0	0	0	0	0	0	0	0	0	0	0	0	0	0	0	0	0	0	0	0	0	0	0	0	0	0	0	0	0	0	0	0	0	0	0
TCGA-2Y-A9GX-01	LIHC	0	0	0	0	0	0	0	0	0	0	0	0	0	0	0	0	0	0	0	0	0	0	0	0	0	0	0	0	0	0	0	0	0	0	0	0	0	0	0	0	0	0	0	0	0	0	0	0
TCGA-2Y-A9GY-01	LIHC	0	0.253881	0	0	0.661178	0	0	0	1	1	0	0	1	1	0	0	0	0	0	0	0	0	0	0	1	1	0	0	0.0113126	0	0	0.988665	1	1	0	0	0.605682	0	0	0.394292	1	1	0	0	1	1	0	0
TCGA-2Y-A9GZ-01	LIHC	0.893722	0	0	0	0.286063	0.19161	0	0	1	1	0	0	0.0033897	0	0	0.0266347	0	0	0	0	0	0.707386	0	0	0	0	0	0	0	0	0	0	1	1	0	0	1	1	0	0	1	1	0	0	0.0205502	0	0	0.972297
TCGA-2Y-A9H0-01	LIHC	0	0	0	0	1	1	0	0	0	0	0	0	0	0	0	0	0	0	0	0	0	0	0	0	0	0	0	0	0	0	0	0.841028	0	0.945024	0	0	0	0	0	0	0	0	0	0.33265	0	0	0	0.897277
TCGA-2Y-A9H1-01	LIHC	0	0	0	0	0.999935	0	0	0	0	0	0	0	0	0	0	0	0	0	0	0	0	0	0	0	0	0	0	0	0	0	0	0	1	1	0	0	1	1	0	0	0	0	0	0	0	0	0	0
TCGA-2Y-A9H2-01	LIHC	0.741144	0	0	0.258748	1	1	0	0	1	1	0	0	0.246728	0	0	0	0	0	0	0.950355	0	0	0	5.18e-05	0	0.999999	0	0	0	0	0.99999	0	1	1	0	0	0.12314	0	0	0	1	1	0	0	4.6e-08	0	0	0.999978
TCGA-2Y-A9H3-01	LIHC	2.9043e-05	0	0	0	1	1	0	0	0	0	0	0	0	0	0	0	0	0	0	0	0	0	0	0	0.0453159	0	0	0	0	0	0	0	1	1	0	0	0.0685879	0	0	0	0	0	0	0	0	0	0	0
TCGA-2Y-A9H4-01	LIHC	0	0	0	3.29e-05	0	0	0	0	0	0.40383	0	0	0	0	0.55423	0	0	0	0	0	0	0	0	0	0	0	0	0	0	0	0	0	1	1	0	0	1	1	0	0	0	0	0	0	0	0	0	0
TCGA-2Y-A9H5-01	LIHC	0	0	1	1	1	1	0	0	1	1	0	0	0.129014	0.283293	0	0	0	0	0	0	0	0	0	0	0	0	0	0	0	0	0	0	0	0	0	0	0	0	0	0	1	1	0	0	0.783373	0	0	0.216623
TCGA-2Y-A9H6-01	LIHC	0	0	1	1	1	1	0	0	0	0	0	0	0	0	0	0	0	0.412374	0	0	0	0	0	0	0	0	0	0	0	0	0	0	0	0	0	0	0	0.110717	0	0	0	0	0	0	0	0	0	0.0242357
TCGA-2Y-A9H7-01	LIHC	0	0	0	0	0	0.999938	0	0	0	0	0	0	0	0	0	0	0	0	0	0	0	0	0	0	0	0	0	0	0	0	0	0	0	0	0	0	0	0	0	0	0	0	0	0	0	0	0	0.851238
TCGA-2Y-A9H8-01	LIHC	0	0	0	0	1	1	0	0	0	0	1	1	0	0	0.502472	0	0.0186029	0	0	0	0	0.40293	0.597012	0	1	1	0	0	0	0	1	1	1	1	0	0	0	0	0	0	1	1	0	0	0.313151	0	0	0.686844
TCGA-2Y-A9H9-01	LIHC	0	0	0	0	1	1	0	0	0	0	0	0	0	0	0	0	0	0	0	0	0	0	0	0	0	0	0	0	0	0	0	0	0	0	0	0	0	0.503713	0	0	0	0	0	0	0	0	0	0.718886
TCGA-2Y-A9HA-01	LIHC	0	0	0	0	0	0	0	0	0	0	0	0	0	0	0	0	0	0	0	0	0	0	0	0	0	0	0	0	0	0	0	0	0	0	0	0	0	0.449869	0	0	0	0.760473	0	0	0	0	0	0.656701
TCGA-2Y-A9HB-01	LIHC	0	0	0	0	0	0.951956	0	0	0	0	0	0	0	0	0	0	0	0	0	0	0	0	0	0	0	0	0	0	0	0	0	0	1	1	0	0	1	1	0	0	0	0	0	0	0	0	0	0
TCGA-2Z-A9J1-01	KIRP	0	0	0	0	0	0	0	0	0	0	0	0	0	0	0	0	0	0	0	0	0	0	0	0	0	0	0	0	0	0	0	0	0	0	0	0	0	0	0	0	0	0	0	0	0	0	0	0
TCGA-2Z-A9J2-01	KIRP	0	0	0	0	0	0.999938	0	0	0	0	0	0	0	0	0	0	0.253992	0	0	0	1	1	0	0	0	0	0	0	0	0	0	0	0	0.00867648	0	0	0	0	0	0	0	0	0	0	0	0	0	0
TCGA-2Z-A9J3-01	KIRP	0	0	0	0	0	0	0	0	0	0	0	0	0	0	0	0	0	0	0	0	0	0.924416	0	0	0	0	0	0	0	0	0	0	0.991604	0	0	0	0	0	0	0	0	0	0	0	0	0	0	0
TCGA-2Z-A9J5-01	KIRP	0	0	0	0	0	0	0	0	1	1	0	0	1	1	0	0	1	1	0	0	1	1	0	0	0	0	0	0	0	0	0	0	0	0	0	0	0	0	0	0	0	0	0	0	0	0	0	0
TCGA-2Z-A9J6-01	KIRP	0	0	0	0	0	0	0	0	0	0	0	0	0	0	0	0	1	1	0	0	1	1	0	0	0	0	0	0	0	0	0	0	0	0	0	0	0	0	0	0	0	0	0	0	0	0	0	0
TCGA-2Z-A9J7-01	KIRP	0	0	0	0	0	0	0	0	0	0	0	0	0	0	0	0	0	0	0	0	0	0	0	0	0	0	0	0	0	0	0	0	0	0	0	0	0	0	0	0	0	0	0	0	0	0	0	0
TCGA-2Z-A9J8-01	KIRP	0	0	0	0.411862	0	0	0	0	0	0	0	0	0	0	0	0	0	0	0	0	0	0	0	0	0	0	0	0	0	0	0	0	0	0	0	0	0	0	0	0	0	0	0	0	0	0	0	0.979265
TCGA-2Z-A9J9-01	KIRP	0	0	0	0	0	0	0	0	0	0	0	0	0	0	0	0	0	0	0	0	0	0	0	0	0	0	0	0	0	0	0	0	0	0	0	0	0	0	0	0	0	0	0	0	0	0	0	0
TCGA-2Z-A9JD-01	KIRP	0	0	0	0	0	0	0	0	0	0	0	0	0	0	0	0	0	0	0	0	0	0	0	0	0	0	0	0	0	0	0	0	0	0	0	0	0	0	0	0	0	0	0	0	0	0	0	0
TCGA-2Z-A9JE-01	KIRP	0	0	0	0	0	0	0	0	0	0	0	0	0	0	0	0	0	0	0	0	0	0	0	0	0	0	0	0	0	0	0	0	0	0	0	0	0	0	0	0	0	0	0	0	0	0	0	0
TCGA-2Z-A9JG-01	KIRP	0	0	1	1	0	0	1	1	0	0	0	0	0	0	0	0	0	0	1	1	0	0	1	1	0	0	0	0	0	0	0	0	0	0	0	0	0	0	0	0	0	0	1	1	0	0	1	1
TCGA-2Z-A9JI-01	KIRP	0	0	0	0	0	0	0	0	0	0	0	0	0	0	0	0	0	0	0	0	0	0	0	0	0	0	0	0	0	0	0	0	0	0	0	0	0	0	0	0	0	0	0	0	0	0	0	0.990799
TCGA-2Z-A9JJ-01	KIRP	0	0	0	0	0	0	0	0	0	0	0	0	0	0	0	0	0	0	0	0	0	0	0	0	0	0	0	0	0	0	0	0	0	0	0	0	0	0	0	0	0	0	0	0	0	0	0	0.69079
TCGA-2Z-A9JK-01	KIRP	0	0	0	0	0	0	0	0	0	0	0	0	0	0	0	0	0	0	0	0.998785	0	0	0	0	0	0	0	0	0	0	0	0	0	0	0	0	0	0.612603	0	0	0	0	0	0	0	0	0	0
TCGA-2Z-A9JL-01	KIRP	0	0	0	0	0	0	0	0	0	0	0	0	0	0	0	0	0	0	0	0	0	0	0	0	0	0	0	0	0	0	0	0	0	0	0	0	0	0	0	0	0	0	0	0	0	0	0	0
TCGA-2Z-A9JM-01	KIRP	0	0	0	0	0	0	0	0	0	0	0	0	0	0	0	0	0	0	0	0	0	0	0	0	0	0	0	0	0	0	0	0	0	0	0	0	0	0	0	0	0	0	0	0	0	0	0	0
TCGA-2Z-A9JN-01	KIRP	0	0	0	0	0	0	0	0	0	0	0	0	0	0	0	0	0	0	0	0	0	0	0	0	0	0	0	0	0	0	0	0	0	0	0	0	0	0	0	0	0	0	0	0	0	0	0	0
TCGA-2Z-A9JO-01	KIRP	0	0	0	0	0	0	0	0	0	0	0	0	0	0	0	0	0	0	0	0	0	0	0	0	0	0	0	0	0	0	0	0	0	0	0	0	0	0	0	0	0	0	0	0	0	0	0	0
TCGA-2Z-A9JP-01	KIRP	0	0	0	0	0	0	0	0	0	0	0	0	0	0	0	0	0	0	0	0	0	0	0	0	0	0	0	0	0	0	0	0	0	0	0	0	0	0	0	0	0	0	0	0	0	0	0	0
TCGA-2Z-A9JQ-01	KIRP	0	0	0	0	0	0	0	0	0	0	0	0	0	0	0	0	0	0	0	0	0	0	0	0	0	0	0	0	0	0	0	0	0	0	0	0	0	0	0	0	0	0	0	0	0	0	0	0
TCGA-2Z-A9JR-01	KIRP	0	0	0	0	0	0	0	0	0	0	0	0	0	0	0	0	0	0	0	0	0	0	0	0	0	0	0	0	0	0	0	0	0	0	0	0	0	0	0	0	0	0	0	0	0	0	0	0
TCGA-2Z-A9JS-01	KIRP	0	0	0	0	0	0	0	0	0	0	0	0	0	0	0	0	0	0	0	0	0	0	0	0	0	0	0	0	0	0	0	0	0	0	0	0	0	0	0	0	0	0	0	0	0	0	0	0
TCGA-2Z-A9JT-01	KIRP	0	0	0	0	0	0	0	0	0	0	0	0	0	0	0	0	0	0	0	0	0	0	0	0	0	0	0	0	0	0	0	0	0	0	0	0	0	0	0	0	0	0	0	0	0	0	0	0
TCGA-30-1714-01	OV	0.00535801	0.0665346	0	0	1	1	0	0	1	1	0	0	0.756741	0	0	0	0	0	0	0.203774	0	0.74889	0	0	0	0.0193455	0.54552	0	0	0	1	1	0	0	0	0	0	0	0	0	1	1	0	0	0.999179	0	0	0
TCGA-30-1718-01	OV	0.788146	1	0	0	1	1	0	0	0.060799	0	0	0	0.897945	0	0	0	0.199661	0	0	0.286181	0.913507	0	0	0	1	1	0	0	0.644225	0	0	0.287258	1	1	0	0	0	0.0980743	0.901868	0	1	1	0	0	0	0	1	1
TCGA-30-1853-01	OV	0	0.0090993	0	0	1	1	0	0	1	1	0	0	0.00496013	0	0	0.992125	0.294534	0	0	0	1	1	0	0	0	0	1	1	0	0	1	1	1	1	0	0	1	1	0	0	0	0.619568	0.380377	0	0	0	1	1
TCGA-30-1855-01	OV	0.0326841	0.115747	0	0	1	1	0	0	0	0	0	0	0	0	0	0.0473999	0	0	1	1	0	0.954986	0	0	1	1	0	0	0.176509	0	0	0	0.324566	0	0	0	0	0	0	0.999935	0	0	0.307726	0	0	0	1	1
TCGA-30-1856-01	OV	0.784679	0	0	0	1	1	0	0	0	0	0	0	0	0	0	0	0	0	0	0	0	0.825485	0	0	0	0	1	1	0	0	1	1	0	0	0	0	0	0	0	0.928593	0	0.72549	0	0	0	0	0	0
TCGA-30-1857-01	OV	0	0	0	0	0.270569	0	0	0.188667	0	0	0	0	0	0	0	0	0	0	0	0	0	0.75091	0	0	0	0	0	0	0	0	0	0.501631	0	0	0	0	0	0	0	0	0	0	0	0	0	0	0	0.813589
TCGA-30-1859-01	OV	0	0	1	1	0	0	0	0	1	1	0	0	1	1	0	0	1	1	0	0	1	1	0	0	0	0	0	0	0	0	0	0.508005	0	0	1	1	0	0	1	1	0	0.414018	0	0	0	0	0	0.611292
TCGA-30-1860-01	OV	0	0	0	0.243768	1	1	0	0	1	1	0	0	0	0	1	1	0.142014	0.104095	0	0	1	1	0	0	0.865727	0	0	0.134171	0.850879	0	0	0.149071	1	1	0	0	0.176283	0	0	0	0.943682	0	0	0.0560808	0.46484	0	0	0.53506
TCGA-30-1861-01	OV	0	0	0	0	0	0	0	0	0	0	0	0.339574	0	0	0	0.0391374	1	1	0	0	1	1	0	0	0	0	0.347661	0.298474	0	0	1	1	0	0	0.962732	0	0	0	0.724324	0	0.359391	0.0108044	0	0	0.0300561	0	0	0.969923
TCGA-30-1862-01	OV	1	1	0	0	1	1	0	0	1	1	0	0	0.601992	0	0	0.397976	0.020474	0	0	0.979499	0	0	1	1	0	0	1	1	0	0	1	1	0	0	1	1	0	0	1	1	0.128289	0	0	0.871544	1	1	0	0
TCGA-30-1866-01	OV	1	1	0	0	1	1	0	0	0	0	0	0	0	0	0	0	0	0.965707	0	0	0.845003	0	0	0	0	0.0274543	0.838078	0	0	0	0.11995	0.277979	1	1	0	0	0	0	1	1	0	0	0.671872	0	0	0	0.796088	0
TCGA-30-1867-01	OV	1	1	0	0	1	1	0	0	1	1	0	0	0.0720438	0	0	0	0	0	0	0	0	0.81868	0	0	0	0	0	0.0122462	0	0	0	0.297446	0	0	2.65e-05	0	0	0	1	1	0	0	0	0	0	0.19874	0	0
TCGA-30-1880-01	OV	1	1	0	0	1	1	0	0	1	1	0	0	1	1	0	0	1	1	0	0	1	1	0	0	0	0	1	1	0	0	1	1	1	1	0	0	1	1	0	0	0	0	1	1	0	0	1	1
TCGA-30-1887-01	OV	0	0	0	0.13483	0	0	0	0	0	0	0	0	0	0	0	0.999966	0	0	1	1	1	1	0	0	0	0	0	0	0	0	0	0	0	0.795751	0.204151	0	0	0	1	1	0	0	0	0	0	0	0	0
TCGA-30-1891-01	OV	1	1	0	0	0.679026	0	0	0.594958	0.336961	0.217758	0	0	0.751436	0	0	0.248561	1	1	0	0	0.824171	0	0	0	0.0738497	0.128032	0	0	0.246907	0	0	0.753057	0	0.947868	0	0	0	0.611985	0	0	1	1	0	0	1	1	0	0
TCGA-30-1892-01	OV	0	0	0	0	0	0	0	0	0	0	0	0	0	0	0	0	1	1	0	0	0.937995	0	0	0.0619734	0	0	0	0	0	0	0	0	0	0	0	0	0	0.874708	0	0	0	0	0	0	0	0	0	0.410885
TCGA-31-1944-01	OV	0	0.329879	0	0	0	0.686834	0	0	0	0.0016002	0	0	0	0	0	0	0	0	0	0	0	0.417903	0	0	0	0	0	0	0	0	0	0	0	0	0	0.675441	0	0	0	0	0	0	0	0.0345682	0	0	0	0
TCGA-31-1946-01	OV	0	0	0	0	0	0	0	0	0	0.911418	0	0	0	0.00398385	0	0	0	0.132165	0	0	0	0.938562	0	0	0	0	0	0	0	0	0	0.788068	0	0	0	0	0	0.641895	0	0	0	0	0	0.0857013	0	0	0	0.799149
TCGA-31-1950-01	OV	0	0	0	0	0	0	0	0	1	1	0	0	1	1	0	0	0.00952819	0	0	0	1	1	0	0	0	0	1	1	0	0	1	1	0	0.840419	0	0	0	0	0	0	0	0	0	0.652168	0	0	0	0
TCGA-31-1951-01	OV	0	0	0	0.0272349	0	0	0	0	0	0	0	0	0	0	0	0.0218358	0	0	0	0	0	0.676602	0	0	0	0	0	0	0	0	0	0	0	0.372053	0	0	0	0	0	0	0	0	0	0.528176	0	0	0	0.99725
[truncated: 9,623 more rows]
[truncated: 108 more columns]

## Sheet: Table S2d
Table S2d
[truncated: 83 more rows]

## Sheet: Table S2e
Table S2e
[truncated: 5 more rows]

## Sheet: Table S2f
Table S2f
Frequency of aSCNAs within each cohort.
[truncated: 79 more rows]
