# Supplementary material for: Selective and mechanistic pressures shaping cancer aneuploidies
Source: Research Square preprint supplement (doi:10.21203/rs.3.rs-550953/v1), 2021-05-26
Supplement: Supplementary file 7 [file 4a5900c1bf7b04f1aa0b99ca.xlsx]

## Sheet: Table S4a
Table S4a
Chromosome arm-level SCNAs sorted from highest to lowest by lineage specificity. Values under each tumor type represent the divergence of the tSCNA breakpoint distributions in that tumor type from those in all other samples (i.e. "divergence score"). See Methods for details.
arm	direction	lineage-specificity score	ACC	BLCA	BRCA	CESC	CHOL	COAD	DLBC	ESCA	GBM	HNSC	KICH	KIRC	KIRP	LAML	LGG	LIHC	LUAD	LUSC	MESO	OV	PAAD	PCPG	PRAD	READ	SARC	SKCM	STAD	TGCT	THCA	THYM	UCEC	UCS	UVM
5q	amp	0.74217	NA	2.31783	2.46293	2.48149	1.86916	2.14519	NA	2.63683	2.11145	2.27335	NA	6.22006	2.38262	NA	1.64896	2.89066	3.19774	2.57163	2.0085	2.86085	2.00352	1.61777	2.84725	2.57357	2.68893	2.55675	2.76437	NA	NA	NA	2.4777	2.0205	NA
2p	del	0.383416	1.83312	2.22709	3.4387	NA	NA	2.10439	1.80709	3.05056	2.66803	2.96461	NA	NA	NA	NA	2.5334	1.84047	2.87446	3.08736	NA	3.57819	2.17499	NA	NA	2.39193	4.15776	2.69349	2.85511	2.24609	NA	NA	2.73614	NA	NA
19p	del	0.371779	NA	2.65785	1.97725	2.74318	NA	2.49834	NA	2.61334	2.05844	1.97966	NA	2.13115	1.68154	NA	1.90296	3.39932	4.16363	2.69369	2.0667	3.06855	2.32151	NA	2.33269	2.29302	3.91113	2.59109	2.66757	2.21551	NA	NA	2.99004	2.83114	NA
20q	del	0.336648	NA	3.05174	2.70503	2.21185	NA	NA	NA	1.6409	2.15826	2.88259	NA	NA	NA	NA	1.90901	NA	3.05215	3.64313	NA	2.74943	NA	NA	NA	NA	2.74913	NA	1.7776	2.09977	NA	NA	2.06997	NA	NA
9q	del	0.318434	NA	2.41885	3.61071	1.90785	NA	1.94014	NA	1.90571	2.00119	2.60251	NA	1.83854	1.64255	NA	1.66448	3.10775	2.46766	2.72375	1.97122	3.50434	NA	NA	1.76781	2.19938	2.69311	2.64807	2.00138	2.15507	NA	NA	2.77922	NA	NA
7p	amp	0.314945	2.00019	2.59511	2.99797	2.00081	NA	2.50811	NA	2.497	2.96347	3.01646	NA	1.75643	NA	NA	1.61545	2.8289	2.49996	3.13162	1.51461	3.20321	2.04039	1.55564	1.77937	1.86611	3.02991	2.67328	2.82255	1.77693	NA	NA	2.48281	1.74587	NA
1q	del	0.311893	1.78883	2.96842	2.86573	1.77891	NA	2.59056	1.82298	2.28847	2.7583	2.61547	NA	2.66231	NA	NA	2.63258	1.73062	2.53841	2.44975	NA	3.4062	NA	2.00085	2.32755	1.96355	4.04349	2.15086	2.70153	NA	NA	NA	2.3546	NA	NA
5p	amp	0.309994	2.28641	2.79299	2.82352	2.74927	NA	2.19459	NA	2.47903	2.33898	2.80126	NA	NA	1.98209	NA	1.64682	3.22762	3.24769	3.39218	NA	3.44896	2.05665	NA	2.39014	1.73245	2.47016	3.34648	2.87266	NA	NA	NA	2.54989	1.68295	NA
5q	del	0.305086	NA	2.26428	2.06837	2.18204	NA	1.82307	NA	1.97458	3.38447	2.42306	NA	NA	NA	1.85437	3.68178	2.18986	2.16005	2.64511	1.79212	2.06187	NA	1.87408	1.92631	1.64444	2.80074	2.92718	1.81208	NA	NA	NA	1.99458	1.50526	NA
3q	del	0.300104	1.66776	1.70537	2.3473	NA	NA	NA	NA	1.7235	2.65547	NA	NA	NA	NA	NA	3.05438	2.06789	2.57379	1.55168	1.7495	1.80508	NA	2.73889	1.75343	NA	3.3184	2.63223	2.03691	1.72213	NA	NA	1.45396	1.86502	NA
14	amp	0.297254	1.64244	2.62049	2.57749	3.15687	NA	NA	NA	2.27545	2.09067	3.58588	NA	NA	NA	NA	1.61245	NA	2.79967	2.72244	NA	2.95947	NA	1.74312	2.08894	1.64407	2.71796	2.45753	2.43713	1.83728	NA	NA	2.71336	2.10253	NA
21	amp	0.288635	NA	2.85449	3.24126	2.08832	NA	2.07902	NA	1.81182	2.30093	2.1778	NA	1.77189	NA	NA	NA	2.22919	2.25258	2.40616	NA	3.85274	NA	1.78688	1.66859	1.63648	2.63377	2.61629	2.25405	1.93249	NA	NA	2.18198	2.03436	NA
6p	amp	0.282646	NA	3.37306	2.98841	2.72201	NA	2.34168	1.80626	2.7497	2.42385	3.24417	NA	1.69841	NA	NA	2.13206	3.19999	2.67086	3.02539	1.71834	2.70051	NA	NA	2.05023	1.88594	2.73898	3.34458	3.1342	2.03156	NA	NA	2.93144	2.30434	2.75254
2q	del	0.282125	1.77861	2.98414	2.45093	3.75466	NA	2.43701	NA	2.36145	2.65746	2.7465	NA	2.71813	2.02083	NA	3.78805	2.48486	2.98891	2.32755	1.89348	2.25302	1.68962	NA	2.28529	2.02252	2.58547	2.75481	2.39181	2.26211	NA	NA	2.20925	1.74229	NA
17q	del	0.277809	NA	2.16697	2.69597	2.07502	NA	2.56703	NA	2.46893	1.67952	2.19638	NA	NA	NA	1.54123	1.62683	1.37596	2.10131	2.05069	NA	2.79331	3.50492	NA	2.15375	2.25985	2.59314	1.91013	2.96796	NA	NA	NA	2.43608	1.55935	NA
3p	del	0.263854	NA	2.34826	2.09394	2.13593	1.91525	2.89808	NA	2.09983	2.5811	2.634	NA	3.58696	1.74133	NA	2.39186	2.34339	2.31456	3.2354	2.26817	3.14833	1.75717	1.70281	3.09071	2.225	2.30035	3.31261	2.36601	2.5773	NA	1.7458	2.3483	1.95774	NA
17p	del	0.257458	2.32593	2.45017	1.77949	2.33535	NA	2.1961	1.76446	2.09744	2.72981	2.40405	NA	1.84425	1.38979	1.86244	NA	2.7507	2.16927	2.40727	2.05942	2.36008	2.07127	2.00293	2.69458	1.70445	4.10642	2.39112	2.2704	2.06685	NA	1.40626	2.16576	2.17748	NA
7q	del	0.254915	1.89846	2.78942	2.89115	2.6755	NA	1.8444	NA	2.53298	2.01827	3.90338	NA	NA	NA	2.53257	1.99672	2.96735	3.18848	2.88566	NA	3.01778	2.41903	NA	2.35887	1.99679	3.35637	2.36149	2.8449	2.62414	NA	NA	2.68836	2.25133	NA
13	amp	0.254184	1.73082	2.79837	2.50111	3.05922	NA	3.13067	NA	2.9623	2.59108	2.83162	NA	1.9699	NA	NA	2.29911	2.83339	3.2846	3.07774	1.94166	3.1665	1.97423	1.73071	2.29463	2.3422	2.7606	2.96925	3.26505	NA	NA	NA	3.10957	2.14662	NA
12p	amp	0.252809	NA	2.51064	2.53549	2.20997	NA	2.4242	NA	2.32815	2.33938	3.12859	NA	NA	NA	NA	3.37612	2.27487	2.76304	3.31656	1.73631	3.31498	2.19444	NA	1.68973	2.24588	2.59158	1.93298	2.55848	1.98087	NA	NA	2.73022	1.76101	NA
8q	del	0.252222	NA	1.92097	2.40736	1.59022	NA	1.42089	NA	1.89321	2.26477	NA	NA	NA	NA	NA	2.20963	1.61575	2.31715	1.82916	NA	2.49165	NA	2.17497	1.59299	1.18234	3.58582	2.11418	1.76719	2.08651	1.63726	NA	1.9295	1.62719	NA
16q	amp	0.250301	NA	3.06076	2.6358	2.87327	NA	1.90232	NA	2.07944	1.9065	2.71725	NA	NA	NA	NA	NA	1.62722	2.59624	3.12061	NA	3.35388	NA	NA	NA	NA	2.2905	2.39088	2.43431	NA	NA	NA	2.09423	NA	NA
19p	amp	0.244868	NA	2.09951	2.02153	2.32473	NA	1.84576	NA	1.7164	3.10362	1.92867	NA	NA	NA	NA	2.47624	1.74069	2.15546	2.25261	NA	1.95555	NA	2.05132	NA	1.68294	3.43106	2.33186	1.49993	NA	NA	NA	1.66319	NA	NA
11p	del	0.235418	1.65827	3.26105	1.76917	2.94389	NA	2.6076	NA	3.02927	3.06717	2.50619	1.79212	NA	NA	NA	3.07247	2.56795	2.95135	2.38941	1.88173	2.27851	2.22452	2.40605	2.42541	2.11551	3.0185	2.90318	2.74701	1.65864	NA	NA	2.52916	2.17005	NA
7q	amp	0.233425	NA	2.40726	3.31725	2.30149	NA	2.47095	NA	2.20381	2.75195	2.60225	NA	2.36846	NA	NA	3.84093	2.7267	3.07235	3.1952	NA	2.63301	NA	NA	2.04335	NA	2.15493	3.10067	2.48946	NA	NA	NA	2.48256	1.95306	NA
1p	amp	0.232203	1.71629	2.93228	2.31934	2.5915	NA	1.83999	NA	2.37512	2.97088	2.60204	NA	NA	NA	NA	NA	1.97927	3.04536	2.38062	NA	2.55294	1.74183	NA	1.7036	NA	3.30191	2.83311	2.48635	2.07039	NA	NA	2.25223	1.87883	NA
12q	del	0.227459	1.76631	2.84309	2.61503	2.24833	1.86367	2.53104	NA	2.67597	2.3707	2.81157	NA	1.65311	NA	NA	3.59676	3.04944	2.6815	2.67372	NA	2.33332	2.39408	1.62546	2.72914	2.10835	2.80314	2.99014	2.60315	1.84969	NA	NA	2.78668	2.68675	NA
6q	amp	0.226293	NA	2.23532	2.99743	1.7611	NA	2.37073	NA	2.66791	1.70136	2.71638	NA	NA	NA	NA	1.57257	2.11054	2.55672	2.52314	1.5647	2.30154	NA	NA	NA	2.01654	2.89717	1.86889	2.46218	1.73771	NA	NA	2.97568	NA	NA
6q	del	0.224821	1.96412	2.01222	1.55183	3.14527	1.94917	2.62469	1.56381	2.36426	2.48292	2.41963	NA	2.86397	2.38362	NA	3.80751	2.40073	2.44922	2.82066	2.23131	2.49569	2.61655	2.4386	2.54265	2.06414	2.58202	2.73329	2.95492	2.55133	NA	NA	2.4859	1.68635	2.02034
9q	amp	0.224287	1.90308	2.50728	3.09644	2.92102	NA	2.36413	NA	2.78752	2.5982	3.6419	NA	NA	NA	NA	2.44396	2.37145	2.66003	2.77668	NA	3.16659	1.41277	NA	2.86283	2.23559	2.32846	2.39278	2.46921	NA	NA	NA	2.2951	NA	NA
14	del	0.216011	1.962	3.27965	2.59875	3.11867	2.3368	2.69276	NA	2.93701	2.58965	2.99903	NA	2.84624	2.08514	NA	3.40986	2.98254	3.40981	2.9054	1.96599	3.12838	NA	1.83425	2.50542	2.28116	2.86739	2.80915	2.74429	2.06721	NA	NA	2.64404	2.03941	NA
2p	amp	0.215094	NA	2.99707	3.09937	2.74711	NA	2.34274	NA	2.83599	2.07726	3.07551	NA	NA	NA	NA	2.40748	3.23717	2.91759	3.23123	1.78177	2.77243	NA	NA	2.19851	2.349	2.35369	2.3932	2.84945	2.76754	NA	NA	3.46342	1.8835	NA
10q	del	0.21478	1.66845	2.84042	2.2768	2.83541	1.90521	2.86874	NA	2.98576	2.86411	2.63146	NA	2.36512	NA	NA	3.75129	3.05979	2.5604	2.41443	2.32329	2.39179	1.96361	NA	3.16556	2.48668	3.23691	2.94949	2.46832	2.56462	NA	NA	2.57308	2.08596	NA
7p	del	0.212578	NA	2.65034	2.58357	2.14171	NA	NA	NA	2.26081	NA	2.62438	NA	NA	NA	NA	2.86187	1.93105	2.2301	2.81631	NA	3.67424	NA	NA	2.2115	NA	2.35864	1.95986	2.84016	NA	NA	NA	2.84056	1.92952	NA
19q	del	0.212297	1.73498	2.74235	2.93482	2.39386	NA	2.49706	NA	2.68862	2.39739	3.18733	NA	NA	1.63467	NA	2.99145	2.46187	3.20936	2.93007	1.92588	2.28831	2.22084	1.59546	NA	2.45799	2.63615	2.84542	2.96969	2.91336	NA	NA	2.61455	2.30249	NA
4q	del	0.211968	2.45511	2.7341	2.30778	3.16789	2.47009	3.10008	1.72385	2.57423	2.72617	2.29928	NA	2.99743	1.725	NA	3.61979	2.95753	2.47304	2.26847	2.263	2.97263	2.33701	1.92916	2.69797	2.62127	2.73918	3.25452	3.31008	2.81157	NA	NA	2.68822	2.21815	NA
11q	del	0.21073	1.92731	2.51846	2.07355	3.07505	2.07278	2.5336	NA	2.9035	2.72178	3.03198	NA	2.00552	2.25522	NA	3.35748	2.77944	2.9026	3.09116	2.0735	3.29854	NA	2.56274	2.65586	2.12477	3.26091	2.78597	2.93593	2.93631	NA	NA	3.0603	2.59619	1.78036
21	del	0.209138	1.69896	2.6457	3.20298	2.73218	NA	2.32716	NA	2.57712	2.31751	3.01291	NA	NA	1.65372	NA	2.20965	2.49592	2.80283	2.9205	NA	3.24996	NA	NA	2.86366	1.83501	2.90403	2.73612	2.89963	NA	NA	NA	2.42554	2.16115	NA
6p	del	0.207721	1.74861	3.27581	2.87935	2.69389	NA	2.94683	NA	2.99713	2.46287	2.9136	NA	1.88187	2.15098	NA	2.72179	1.98841	2.63307	3.22299	NA	3.13262	2.95209	NA	2.80283	2.35095	3.31384	NA	2.75879	2.11301	NA	2.19095	2.62562	NA	NA
13	del	0.207075	NA	2.63532	3.03289	2.42416	NA	2.03927	2.05226	2.31131	2.20715	2.83515	NA	1.8059	NA	NA	2.26458	2.30337	2.31668	2.79973	NA	2.66143	1.91029	NA	3.39527	NA	2.63527	3.10572	3.02115	NA	NA	NA	2.43902	1.68125	NA
19q	amp	0.205415	NA	3.17861	2.54871	2.97973	NA	2.25124	2.04864	2.33778	2.61504	2.59225	NA	1.64911	NA	NA	1.73834	2.82343	2.64773	3.15185	NA	2.92513	2.46384	NA	1.96078	NA	2.12995	2.60683	2.72641	NA	NA	NA	2.51806	1.71836	NA
20q	amp	0.197546	NA	2.29687	2.47683	1.96375	NA	2.2082	NA	2.25086	2.5424	2.58177	NA	1.88845	1.73867	NA	2.27981	2.96573	3.0842	2.88964	NA	3.09529	2.54607	NA	2.53214	NA	2.79021	3.12724	2.85563	NA	NA	NA	2.87451	1.69168	NA
18p	amp	0.193327	NA	2.55478	2.51033	2.23008	NA	1.62346	NA	2.50118	1.73959	3.23651	NA	NA	NA	NA	1.90007	2.09121	2.55031	2.9969	NA	2.86275	2.04409	NA	NA	NA	2.44534	2.39658	2.79478	NA	NA	NA	2.65003	NA	NA
22	amp	0.191098	NA	NA	3.05969	2.20434	NA	NA	NA	1.95918	NA	2.53053	NA	NA	NA	NA	1.83406	2.47918	2.65249	3.12439	NA	2.48011	NA	NA	1.57814	NA	2.18644	2.43569	1.99799	NA	NA	NA	2.17005	NA	NA
16q	del	0.190653	1.98351	3.14041	2.63278	2.86133	NA	2.60994	NA	2.83364	2.8984	3.19506	NA	NA	1.89126	NA	2.62888	2.84252	2.54909	3.13648	2.3005	3.12871	NA	1.73223	2.97898	2.39756	3.09931	3.26402	3.01576	3.11886	NA	NA	3.01507	2.29259	NA
1p	del	0.190483	1.97572	2.63079	2.14901	2.06171	2.56615	2.06799	1.73747	2.45935	4.06213	2.28562	NA	2.46697	2.4695	NA	2.88458	2.46672	2.19538	2.86404	2.54386	2.48758	1.91454	2.57481	2.70119	2.35894	2.53883	2.85695	2.24223	2.69141	NA	NA	2.37321	2.0463	1.90668
18q	del	0.189488	1.77106	2.36834	2.06084	2.32894	2.23895	3.08279	NA	2.37109	2.79754	2.00015	NA	2.30242	NA	NA	3.09449	2.96004	2.29781	2.08351	2.23004	1.86008	3.06243	NA	2.97201	2.38298	3.03069	2.81868	2.71103	2.12189	NA	NA	2.81674	1.77447	NA
10p	amp	0.184148	NA	3.19431	2.99313	2.66018	NA	2.34279	NA	2.28307	2.45648	2.57601	NA	NA	NA	NA	3.28096	2.32238	2.83476	2.79323	NA	2.64554	NA	NA	1.99475	NA	2.12871	2.19147	2.5026	NA	NA	NA	2.53911	1.52354	NA
17p	amp	0.179446	NA	2.24515	2.21069	1.61797	NA	1.86139	NA	1.86694	2.14236	2.47587	NA	NA	NA	NA	NA	1.89022	1.97935	2.72323	NA	3.02742	NA	NA	NA	NA	2.76248	1.89524	1.88528	NA	NA	NA	2.15472	1.49987	NA
8q	amp	0.178255	2.08106	3.06123	2.11898	3.13952	2.22613	2.91714	2.07075	2.74146	2.51956	2.49815	NA	3.21049	2.02095	NA	2.995	2.91339	2.08282	2.58011	1.78467	2.10674	2.84168	NA	3.12293	2.65392	2.75973	2.47777	2.68905	2.23451	NA	NA	2.77896	1.77915	2.43392
9p	amp	0.17761	NA	2.61669	2.98704	3.10273	NA	2.35894	NA	2.38843	2.91916	3.12598	NA	1.79739	NA	NA	1.86829	2.5881	2.79832	2.92944	2.13753	3.24245	NA	NA	NA	NA	2.5565	2.27576	2.64561	NA	NA	NA	2.88612	NA	NA
12q	amp	0.172672	NA	2.78931	2.85922	2.30213	NA	2.20857	NA	2.59595	1.97285	2.75664	NA	1.84641	NA	NA	2.57581	2.7205	2.84586	2.96321	NA	2.70148	NA	1.9099	2.34321	1.80706	2.9408	2.47034	3.05059	1.99082	NA	NA	2.13222	1.85286	NA
1q	amp	0.164789	1.97251	2.78273	3.22518	2.30054	NA	2.47479	NA	2.89332	2.39191	2.83177	NA	2.26719	NA	NA	1.73723	2.60336	2.91452	2.90339	NA	2.99329	NA	NA	1.909	2.29646	2.45835	3.11349	2.63576	2.35835	NA	NA	2.70913	2.11515	2.04313
5p	del	0.164267	NA	2.08685	2.85769	NA	NA	2.65853	NA	1.8506	2.44372	2.28051	NA	NA	NA	NA	2.77783	NA	NA	2.03246	NA	2.82592	NA	NA	1.74332	1.88526	2.70537	2.57562	2.61873	1.73671	NA	NA	2.08397	NA	NA
20p	del	0.161067	1.98424	2.59098	2.90543	2.52581	1.82917	3.07008	NA	2.17413	1.81478	2.8709	NA	NA	NA	NA	2.09173	2.58086	2.59449	2.79962	2.04709	2.90149	2.23518	NA	2.45078	3.15568	2.98409	2.64726	2.38604	2.68919	NA	NA	2.56316	1.92662	NA
11p	amp	0.160211	NA	1.85551	3.1411	NA	NA	2.05173	NA	2.33913	1.78091	2.38856	NA	1.52776	NA	NA	2.41863	2.34799	2.73392	2.2815	NA	2.54569	NA	1.94397	1.82309	1.97813	2.00454	2.29061	2.36191	NA	NA	NA	2.37257	1.49276	NA
15	del	0.160211	NA	2.58082	2.5482	1.70842	NA	2.47083	NA	2.21953	2.39096	2.84104	NA	1.67395	NA	NA	2.0109	3.29918	2.25792	2.05617	NA	2.5809	NA	NA	2.45747	1.72036	2.41495	2.01012	2.25532	2.44136	NA	NA	2.67659	NA	NA
18q	amp	0.158744	NA	1.69172	2.9202	1.72405	NA	NA	NA	1.85491	2.11741	1.85267	NA	NA	NA	NA	1.55523	2.30662	2.55776	2.58477	NA	2.53525	NA	NA	NA	NA	2.2318	2.28444	2.5149	NA	NA	NA	2.19946	1.72378	NA
17q	amp	0.157609	2.03213	2.86211	2.27846	3.00321	1.79357	2.74949	NA	2.98501	2.67778	2.59431	NA	2.55021	2.38544	NA	2.9626	3.01879	2.99455	3.13599	2.27833	2.55333	2.09428	2.21854	2.30799	2.07975	3.0166	2.54538	2.80189	2.50064	NA	NA	3.31973	2.52776	1.99159
15	amp	0.156668	2.21435	2.39383	2.09206	2.79099	1.65712	2.37322	NA	2.74325	2.51354	3.05257	NA	NA	NA	NA	2.45223	2.95572	2.67762	2.58162	2.43875	1.99051	2.40059	NA	2.16494	NA	3.10598	3.12108	2.68674	1.77704	NA	NA	2.64266	2.2671	NA
4p	del	0.151719	NA	2.35787	2.4749	2.54249	NA	2.69263	NA	2.65565	2.39048	2.60679	NA	1.78545	NA	NA	2.1208	2.93831	3.10204	2.81338	NA	2.31508	1.94471	NA	2.54966	1.90102	2.66872	3.27198	2.95797	2.31022	NA	NA	2.59837	2.06623	NA
3q	amp	0.150938	2.11583	2.70503	2.26449	2.65288	1.96607	2.82976	NA	2.76599	3.20723	2.83669	NA	2.61898	2.38071	NA	1.97131	2.94294	2.52421	2.12144	NA	2.00459	2.36218	NA	2.78697	2.45525	3.2114	2.93306	2.80067	2.79427	NA	NA	3.30957	2.44052	NA
3p	amp	0.149212	NA	2.81305	2.39801	2.51399	NA	1.89017	NA	2.17375	2.35503	2.40337	NA	NA	NA	NA	2.61148	2.59799	2.89515	2.45736	2.28835	3.08701	NA	NA	2.18117	1.90766	3.0221	1.88348	2.28563	2.2693	NA	NA	3.02661	1.83821	NA
16p	amp	0.149166	NA	1.85923	2.75272	2.44213	NA	2.18836	NA	1.70877	2.41113	2.7593	NA	NA	NA	NA	1.84756	2.22119	2.44858	2.53972	1.76834	2.98604	NA	NA	2.02418	NA	2.62094	2.07795	2.39019	NA	NA	NA	2.42555	1.66694	NA
20p	amp	0.146435	NA	2.42751	3.00474	2.33992	NA	1.94507	NA	2.30706	2.01402	2.57839	NA	NA	NA	NA	2.07653	2.26205	2.75367	2.73091	NA	3.25425	1.67718	NA	NA	2.18416	2.47845	2.3238	2.54747	NA	NA	NA	2.59257	NA	NA
10p	del	0.145872	1.92557	2.2036	2.45533	2.04036	NA	2.66166	NA	2.66331	2.84549	2.81121	NA	1.89249	1.86565	NA	2.00168	2.12079	3.03522	2.55116	2.86712	2.21503	2.53207	NA	2.63673	1.65432	2.50033	2.32028	2.71723	1.74371	NA	NA	2.31344	2.34595	NA
11q	amp	0.144425	NA	2.60288	2.62871	NA	NA	2.35827	2.25916	2.2159	2.70408	2.38741	NA	1.79569	NA	1.81272	2.55041	1.92177	3.13715	2.427	1.84818	2.04712	1.77263	NA	2.20004	1.97725	2.35487	2.57823	2.71903	NA	NA	NA	2.3749	1.61116	NA
16p	del	0.140356	NA	2.68682	2.7577	2.31676	NA	2.50286	NA	2.56447	2.16126	3.04851	NA	NA	NA	NA	NA	2.33081	2.42469	2.81363	NA	2.19742	1.97865	NA	1.8117	1.76102	2.70433	2.62581	2.63939	1.64517	NA	NA	2.26095	2.3339	NA
2q	amp	0.137163	1.64206	NA	2.82598	NA	NA	2.41414	NA	2.37468	1.68827	2.24974	NA	2.57041	NA	NA	NA	2.46325	2.89763	2.73069	NA	2.9153	2.10549	NA	NA	2.085	2.19718	2.52779	2.65205	2.47596	NA	NA	2.29883	1.9302	NA
9p	del	0.135559	2.07231	2.56786	2.44479	2.68441	NA	2.20067	NA	2.59861	2.28701	2.82249	NA	1.66044	1.97964	NA	2.35448	2.44415	2.22529	2.03952	2.00327	2.30909	2.13995	1.82062	3.26299	2.41938	2.7462	2.47546	2.27107	2.53836	NA	NA	2.76854	1.69631	NA
4q	amp	0.125158	NA	2.32081	2.70976	2.39448	NA	NA	NA	2.39587	NA	2.31584	NA	NA	NA	NA	NA	2.00789	2.5914	2.19989	NA	2.83567	NA	NA	2.41751	1.68949	2.05709	2.61933	1.86401	1.80023	NA	NA	1.81715	1.83415	NA
8p	amp	0.124523	NA	1.49825	1.931	NA	NA	1.61861	NA	1.72754	2.22443	2.00241	NA	NA	NA	NA	1.96613	2.09098	2.14052	1.9913	NA	2.05181	1.32601	NA	2.0629	NA	1.89766	1.94675	2.90922	1.72927	NA	NA	1.45126	NA	NA
22	del	0.12304	1.72119	2.80631	2.4823	2.68521	NA	2.4754	NA	2.40832	3.01184	2.46264	NA	NA	1.40191	NA	2.48834	2.87105	2.37704	2.73341	2.13722	2.2078	2.50562	2.72205	2.46241	2.25238	2.71078	2.5702	2.60087	2.94629	2.40384	NA	2.74791	2.5154	NA
18p	del	0.121534	NA	2.38467	2.95518	2.22937	NA	2.5557	NA	2.26018	2.5532	2.53431	NA	NA	NA	NA	2.55598	2.31745	2.53089	2.95975	NA	2.93949	2.32184	NA	2.09737	1.50022	2.75047	2.3939	2.576	NA	NA	NA	2.09274	NA	NA
12p	del	0.115645	NA	2.68464	3.20694	2.45822	NA	2.60349	NA	2.73395	2.25733	2.76605	NA	NA	1.82203	NA	2.52122	2.75626	2.66785	2.5345	NA	3.14205	2.35407	NA	2.97033	NA	2.86111	2.79154	2.78836	NA	NA	NA	2.54546	1.99206	NA
4p	amp	0.108573	NA	2.69782	2.67456	1.74899	NA	2.22522	NA	2.34761	1.78798	2.83737	NA	NA	NA	NA	NA	2.69359	2.2658	2.75456	NA	2.6029	NA	NA	2.14196	1.92747	2.46453	2.49641	2.59868	NA	NA	NA	2.18172	2.44813	NA
8p	del	0.0967008	2.08489	1.65271	2.06479	1.99799	1.55011	1.84681	1.53937	2.06066	2.50107	2.00088	NA	1.9196	NA	NA	2.47944	1.95263	1.68533	2.0408	2.10893	1.38647	1.85344	NA	2.09359	1.99348	1.89859	2.08085	2.60209	2.62653	NA	NA	1.7504	2.04481	NA
10q	amp	0.0745249	2.15525	2.22627	2.52561	1.91761	NA	2.27529	NA	2.20979	NA	2.45329	NA	NA	NA	NA	NA	2.23574	2.27713	2.32512	NA	2.4635	NA	NA	NA	1.67438	2.59942	1.71501	2.48152	2.27131	NA	NA	2.36278	1.82204	NA

## Sheet: Table S4b
Table S4b
Spearman's rho and p-values for correlation between "divergence score" (see Table S4e and Methods) and the difference between the tumor type's aSCNA rates and the pan-cancer aSCNA rates (see Table S2f). Fisher's method p-value is reported at the bottom.
	rho	p
ACC	-0.131342	0.436964
BLCA	0.284238	0.0130793
BRCA	0.0379747	0.740844
CESC	0.217136	0.0690474
CHOL	-0.273529	0.304279
COAD	0.187022	0.118235
DLBC	-0.0839161	0.800198
ESCA	0.171664	0.132716
GBM	0.0617697	0.60036
HNSC	0.214545	0.0628683
KICH	NA	NA
KIRC	0.170369	0.305264
KIRP	0.381739	0.0665479
LAML	0.1	0.95
LGG	0.18422	0.132429
LIHC	0.173115	0.137269
LUAD	-0.0416951	0.718276
LUSC	0.273258	0.0157422
MESO	-0.0481338	0.779874
OV	0.0154655	0.892929
PAAD	0.103171	0.503866
PCPG	0.51453	0.00789697
PRAD	-0.200743	0.108772
READ	-0.0551724	0.677366
SARC	0.103125	0.368173
SKCM	0.187806	0.104194
STAD	0.199939	0.0793072
TGCT	-0.245042	0.0864167
THCA	-1	1
THYM	1	0.333333
UCEC	0.0801603	0.484599
UCS	0.185034	0.153091
UVM	0.5	0.266667
Fisher's method p-value		0.00164941

## Sheet: Table S4c
Table S4c
List of genes under selection across the 33 unique TCGA tumor types, with peak information. Tumor types are in alphabetical order. Peaks are sorted from largest to smallest by Significance Score (combined_sig). Genes are sorted by genomic location.
Start, End = hg19 start and end of gene
Start.1, End.1 = start and end of gene as fraction of chromosome arm (starting in telomere if tSCNA; starting in centromere if cSCNA)
iter = # of iteration
code = unique identifier for each peak; each element separated by a dash represents an iteration. First iteration is always "n" or "p" (for negative or positive), and next iterations include "l" or "r" (for left or right) along with "n" or "p".
Peak.Start, Peak.End = hg19 start and end of BrISCUT peak
Peak.Start.1, Peak.End.1 = start and end of BrISCUT peak as fraction of chromosome arm
ks_stat = Kolmogorov-Smirnov statistic
ks_p = Kolmogorov-Smirnov p-value
log10_ks_p = log10 of KS p-value
ks_by = Kolmogorov-Smirnov q-value (multiple hypothesis correction by the Benjamini-Yekutieli method)
log10_ksby = log10 of KS q-value
combined_sig = log10_ksby * ks_stat = Significance Score
num_genes = number of genes in peak
Chr	Cytoband	Gene	RefSeqName	Start	End	Start.1	End.1	type	arm	direction	telcent	negpos	iter	code	conf	Peak.Start	Peak.End	Peak.Start.1	Peak.End.1	ks_stat	ks_p	log10_ks_p	ksby	log10_ksby	combined_sig	num_genes
5	p15.33	CLPTM1L	NM_030782	1317858	1345185	0.00907755	0.00969213	ACC	5p	amp	tel	n	1	n	0.95	1325803	4405805	0.00925623	0.0785254	0.68644	0.000416115	3.38079	0.0240147	1.61952	1.11171	23
5	p15.33	LINC01511	NR_125810	1363696	1380188	0.0101084	0.0104793	ACC	5p	amp	tel	n	1	n	0.95	1325803	4405805	0.00925623	0.0785254	0.68644	0.000416115	3.38079	0.0240147	1.61952	1.11171	23
5	p15.33	SLC6A3	NM_001044	1392904	1445543	0.0107653	0.0119492	ACC	5p	amp	tel	n	1	n	0.95	1325803	4405805	0.00925623	0.0785254	0.68644	0.000416115	3.38079	0.0240147	1.61952	1.11171	23
5	p15.33	LPCAT1	NM_024830	1461537	1524092	0.0123089	0.0137157	ACC	5p	amp	tel	n	1	n	0.95	1325803	4405805	0.00925623	0.0785254	0.68644	0.000416115	3.38079	0.0240147	1.61952	1.11171	23
5	p15.33	MIR6075	NR_106723	1510876	1510971	0.0134185	0.0134207	ACC	5p	amp	tel	n	1	n	0.95	1325803	4405805	0.00925623	0.0785254	0.68644	0.000416115	3.38079	0.0240147	1.61952	1.11171	23
5	p15.33	SDHAP3	NR_003263	1572072	1594646	0.0147948	0.0153025	ACC	5p	amp	tel	n	1	n	0.95	1325803	4405805	0.00925623	0.0785254	0.68644	0.000416115	3.38079	0.0240147	1.61952	1.11171	23
5	p15.33	LOC728613	NR_003713	1597671	1634120	0.0153705	0.0161903	ACC	5p	amp	tel	n	1	n	0.95	1325803	4405805	0.00925623	0.0785254	0.68644	0.000416115	3.38079	0.0240147	1.61952	1.11171	23
5	p15.33	MIR4277	NR_036240	1708899	1708983	0.0178721	0.0178739	ACC	5p	amp	tel	n	1	n	0.95	1325803	4405805	0.00925623	0.0785254	0.68644	0.000416115	3.38079	0.0240147	1.61952	1.11171	23
5	p15.33	MRPL36	NM_032479	1798498	1799956	0.0198871	0.0199199	ACC	5p	amp	tel	n	1	n	0.95	1325803	4405805	0.00925623	0.0785254	0.68644	0.000416115	3.38079	0.0240147	1.61952	1.11171	23
5	p15.33	NDUFS6	NM_004553	1801495	1816167	0.0199545	0.0202845	ACC	5p	amp	tel	n	1	n	0.95	1325803	4405805	0.00925623	0.0785254	0.68644	0.000416115	3.38079	0.0240147	1.61952	1.11171	23
5	p15.33	LINC02116	NR_104602	1856083	1856682	0.0211822	0.0211957	ACC	5p	amp	tel	n	1	n	0.95	1325803	4405805	0.00925623	0.0785254	0.68644	0.000416115	3.38079	0.0240147	1.61952	1.11171	23
5	p15.33	IRX4	NM_001278633	1877540	1887293	0.0216648	0.0218841	ACC	5p	amp	tel	n	1	n	0.95	1325803	4405805	0.00925623	0.0785254	0.68644	0.000416115	3.38079	0.0240147	1.61952	1.11171	23
5	p15.33	CTD-2194D22.4	NR_109912	1887444	1900604	0.0218875	0.0221835	ACC	5p	amp	tel	n	1	n	0.95	1325803	4405805	0.00925623	0.0785254	0.68644	0.000416115	3.38079	0.0240147	1.61952	1.11171	23
5	p15.33	LOC100506858	NR_104616	2303833	2312315	0.0312521	0.0314429	ACC	5p	amp	tel	n	1	n	0.95	1325803	4405805	0.00925623	0.0785254	0.68644	0.000416115	3.38079	0.0240147	1.61952	1.11171	23
5	p15.33	LSINCT5	NR_145480	2712704	2715351	0.0404476	0.0405072	ACC	5p	amp	tel	n	1	n	0.95	1325803	4405805	0.00925623	0.0785254	0.68644	0.000416115	3.38079	0.0240147	1.61952	1.11171	23
5	p15.33	IRX2	NM_001134222	2746278	2751769	0.0412027	0.0413262	ACC	5p	amp	tel	n	1	n	0.95	1325803	4405805	0.00925623	0.0785254	0.68644	0.000416115	3.38079	0.0240147	1.61952	1.11171	23
5	p15.33	C5orf38	NM_001294337	2752244	2755511	0.0413369	0.0414103	ACC	5p	amp	tel	n	1	n	0.95	1325803	4405805	0.00925623	0.0785254	0.68644	0.000416115	3.38079	0.0240147	1.61952	1.11171	23
5	p15.33	LOC105374620	NR_136207	2917967	2920642	0.045064	0.0451241	ACC	5p	amp	tel	n	1	n	0.95	1325803	4405805	0.00925623	0.0785254	0.68644	0.000416115	3.38079	0.0240147	1.61952	1.11171	23
5	p15.33	LINC01377	NR_104617	3177948	3181346	0.050911	0.0509874	ACC	5p	amp	tel	n	1	n	0.95	1325803	4405805	0.00925623	0.0785254	0.68644	0.000416115	3.38079	0.0240147	1.61952	1.11171	23
5	p15.33	LINC01019	NR_033898	3417265	3536208	0.0562932	0.0589682	ACC	5p	amp	tel	n	1	n	0.95	1325803	4405805	0.00925623	0.0785254	0.68644	0.000416115	3.38079	0.0240147	1.61952	1.11171	23
5	p15.33	LINC02162	NR_147000	3452929	3461774	0.0570953	0.0572942	ACC	5p	amp	tel	n	1	n	0.95	1325803	4405805	0.00925623	0.0785254	0.68644	0.000416115	3.38079	0.0240147	1.61952	1.11171	23
5	p15.33	LINC01017	NR_104618	3496485	3504118	0.0580748	0.0582465	ACC	5p	amp	tel	n	1	n	0.95	1325803	4405805	0.00925623	0.0785254	0.68644	0.000416115	3.38079	0.0240147	1.61952	1.11171	23
5	p15.33	IRX1	NM_024337	3596167	3601517	0.0603167	0.060437	ACC	5p	amp	tel	n	1	n	0.95	1325803	4405805	0.00925623	0.0785254	0.68644	0.000416115	3.38079	0.0240147	1.61952	1.11171	23
8	p12	KIF13B	NM_015254	28924794	29120610	0.668951	0.673578	BLCA	8p	del	tel	p	1	p	0.95	28982998	30375892	0.670326	0.703243	0.468366	0	inf	0	16	7.49386	13
8	p12	DUSP4	NM_001394	29190578	29208267	0.675232	0.67565	BLCA	8p	del	tel	p	1	p	0.95	28982998	30375892	0.670326	0.703243	0.468366	0	inf	0	16	7.49386	13
8	p12	LINC00589	NR_026765	29578775	29605625	0.684406	0.68504	BLCA	8p	del	tel	p	1	p	0.95	28982998	30375892	0.670326	0.703243	0.468366	0	inf	0	16	7.49386	13
8	p12	LINC02099	NR_125814	29605824	29656008	0.685045	0.686231	BLCA	8p	del	tel	p	1	p	0.95	28982998	30375892	0.670326	0.703243	0.468366	0	inf	0	16	7.49386	13
8	p12	LOC101929470	NR_125817	29672519	29686020	0.686621	0.68694	BLCA	8p	del	tel	p	1	p	0.95	28982998	30375892	0.670326	0.703243	0.468366	0	inf	0	16	7.49386	13
8	p12	LINC02209	NR_024473	29779028	29811123	0.689138	0.689896	BLCA	8p	del	tel	p	1	p	0.95	28982998	30375892	0.670326	0.703243	0.468366	0	inf	0	16	7.49386	13
8	p12	MIR3148	NR_036104	29814787	29814864	0.689983	0.689985	BLCA	8p	del	tel	p	1	p	0.95	28982998	30375892	0.670326	0.703243	0.468366	0	inf	0	16	7.49386	13
8	p12	SARAF	NM_016127	29920527	29940724	0.692482	0.692959	BLCA	8p	del	tel	p	1	p	0.95	28982998	30375892	0.670326	0.703243	0.468366	0	inf	0	16	7.49386	13
8	p12	LEPROTL1	NM_001128208	29952921	29995222	0.693247	0.694247	BLCA	8p	del	tel	p	1	p	0.95	28982998	30375892	0.670326	0.703243	0.468366	0	inf	0	16	7.49386	13
8	p12	MBOAT4	NM_001100916	29989186	30002200	0.694104	0.694412	BLCA	8p	del	tel	p	1	p	0.95	28982998	30375892	0.670326	0.703243	0.468366	0	inf	0	16	7.49386	13
8	p12	DCTN6	NM_006571	30013812	30041155	0.694686	0.695333	BLCA	8p	del	tel	p	1	p	0.95	28982998	30375892	0.670326	0.703243	0.468366	0	inf	0	16	7.49386	13
8	p12	RBPMS-AS1	NR_046205	30239634	30242917	0.700023	0.700101	BLCA	8p	del	tel	p	1	p	0.95	28982998	30375892	0.670326	0.703243	0.468366	0	inf	0	16	7.49386	13
8	p12	RBPMS	NM_006867	30242016	30429778	0.700079	0.704516	BLCA	8p	del	tel	p	1	p	0.95	28982998	30375892	0.670326	0.703243	0.468366	0	inf	0	16	7.49386	13
6	p22.3	LOC100506885	NR_134651	19729651	19804990	0.33306	0.334401	BLCA	6p	del	tel	n	1	n	0.95	19627445	22045044	0.331241	0.374265	0.519883	2.22478e-12	11.6527	6.02791e-10	9.21983	4.79324	8
6	p22.3	ID4	NM_001546	19837600	19842431	0.334981	0.335067	BLCA	6p	del	tel	n	1	n	0.95	19627445	22045044	0.331241	0.374265	0.519883	2.22478e-12	11.6527	6.02791e-10	9.21983	4.79324	8
6	p22.3	MBOAT1	NR_073465	20099915	20212695	0.339649	0.341656	BLCA	6p	del	tel	n	1	n	0.95	19627445	22045044	0.331241	0.374265	0.519883	2.22478e-12	11.6527	6.02791e-10	9.21983	4.79324	8
6	p22.3	E2F3	NM_001949	20402136	20493945	0.345027	0.346661	BLCA	6p	del	tel	n	1	n	0.95	19627445	22045044	0.331241	0.374265	0.519883	2.22478e-12	11.6527	6.02791e-10	9.21983	4.79324	8
6	p22.3	CDKAL1	NM_017774	20534687	21232634	0.347386	0.359807	BLCA	6p	del	tel	n	1	n	0.95	19627445	22045044	0.331241	0.374265	0.519883	2.22478e-12	11.6527	6.02791e-10	9.21983	4.79324	8
6	p22.3	LINC00581	NR_103790	21486291	21512123	0.364321	0.364781	BLCA	6p	del	tel	n	1	n	0.95	19627445	22045044	0.331241	0.374265	0.519883	2.22478e-12	11.6527	6.02791e-10	9.21983	4.79324	8
6	p22.3	SOX4	NM_003107	21593971	21598849	0.366237	0.366324	BLCA	6p	del	tel	n	1	n	0.95	19627445	22045044	0.331241	0.374265	0.519883	2.22478e-12	11.6527	6.02791e-10	9.21983	4.79324	8
6	p22.3	CASC15	NR_015410	21666643	22196049	0.367531	0.376952	BLCA	6p	del	tel	n	1	n	0.95	19627445	22045044	0.331241	0.374265	0.519883	2.22478e-12	11.6527	6.02791e-10	9.21983	4.79324	8
17	p11.2	CCDC144A	NM_014695	16593638	16678313	0.768101	0.772269	BLCA	17p	del	tel	p	1	p	0.95	16621758	17671402	0.769485	0.821146	0.479932	5.22649e-12	11.2818	1.35911e-09	8.86674	4.25544	20
17	p11.2	USP32P1	NR_003190	16690205	16707819	0.772854	0.773721	BLCA	17p	del	tel	p	1	p	0.95	16621758	17671402	0.769485	0.821146	0.479932	5.22649e-12	11.2818	1.35911e-09	8.86674	4.25544	20
17	p11.2	FAM106CP	NM_001348162	16692056	16693815	0.772945	0.773032	BLCA	17p	del	tel	p	1	p	0.95	16621758	17671402	0.769485	0.821146	0.479932	5.22649e-12	11.2818	1.35911e-09	8.86674	4.25544	20
17	p11.2	KRT16P2	NR_029392	16733796	16736147	0.775	0.775115	BLCA	17p	del	tel	p	1	p	0.95	16621758	17671402	0.769485	0.821146	0.479932	5.22649e-12	11.2818	1.35911e-09	8.86674	4.25544	20
17	p11.2	KRT17P1	NR_146392	16744100	16749186	0.775507	0.775757	BLCA	17p	del	tel	p	1	p	0.95	16621758	17671402	0.769485	0.821146	0.479932	5.22649e-12	11.2818	1.35911e-09	8.86674	4.25544	20
17	p11.2	TBC1D27P	NR_147084	16826089	16836490	0.779542	0.780054	BLCA	17p	del	tel	p	1	p	0.95	16621758	17671402	0.769485	0.821146	0.479932	5.22649e-12	11.2818	1.35911e-09	8.86674	4.25544	20
17	p11.2	TNFRSF13B	NM_012452	16842397	16875402	0.780345	0.781969	BLCA	17p	del	tel	p	1	p	0.95	16621758	17671402	0.769485	0.821146	0.479932	5.22649e-12	11.2818	1.35911e-09	8.86674	4.25544	20
17	p11.2	LOC284191	NR_148948	16879312	16884667	0.782162	0.782425	BLCA	17p	del	tel	p	1	p	0.95	16621758	17671402	0.769485	0.821146	0.479932	5.22649e-12	11.2818	1.35911e-09	8.86674	4.25544	20
17	p11.2	LINC02090	NR_146886	16891642	16893490	0.782768	0.782859	BLCA	17p	del	tel	p	1	p	0.95	16621758	17671402	0.769485	0.821146	0.479932	5.22649e-12	11.2818	1.35911e-09	8.86674	4.25544	20
17	p11.2	MPRIP	NM_201274	16946073	17095962	0.785447	0.792824	BLCA	17p	del	tel	p	1	p	0.95	16621758	17671402	0.769485	0.821146	0.479932	5.22649e-12	11.2818	1.35911e-09	8.86674	4.25544	20
17	p11.2	PLD6	NM_178836	17104308	17109646	0.793235	0.793498	BLCA	17p	del	tel	p	1	p	0.95	16621758	17671402	0.769485	0.821146	0.479932	5.22649e-12	11.2818	1.35911e-09	8.86674	4.25544	20
17	p11.2	FLCN	NM_001353230	17115526	17140505	0.793787	0.795017	BLCA	17p	del	tel	p	1	p	0.95	16621758	17671402	0.769485	0.821146	0.479932	5.22649e-12	11.2818	1.35911e-09	8.86674	4.25544	20
17	p11.2	COPS3	NM_003653	17149937	17184617	0.795481	0.797188	BLCA	17p	del	tel	p	1	p	0.95	16621758	17671402	0.769485	0.821146	0.479932	5.22649e-12	11.2818	1.35911e-09	8.86674	4.25544	20
17	p11.2	NT5M	NM_020201	17206679	17250977	0.798274	0.800454	BLCA	17p	del	tel	p	1	p	0.95	16621758	17671402	0.769485	0.821146	0.479932	5.22649e-12	11.2818	1.35911e-09	8.86674	4.25544	20
17	p11.2	MED9	NM_018019	17380299	17396534	0.806819	0.807618	BLCA	17p	del	tel	p	1	p	0.95	16621758	17671402	0.769485	0.821146	0.479932	5.22649e-12	11.2818	1.35911e-09	8.86674	4.25544	20
17	p11.2	RASD1	NM_001199989	17397752	17399709	0.807678	0.807774	BLCA	17p	del	tel	p	1	p	0.95	16621758	17671402	0.769485	0.821146	0.479932	5.22649e-12	11.2818	1.35911e-09	8.86674	4.25544	20
17	p11.2	PEMT	NM_001267552	17408876	17495017	0.808225	0.812465	BLCA	17p	del	tel	p	1	p	0.95	16621758	17671402	0.769485	0.821146	0.479932	5.22649e-12	11.2818	1.35911e-09	8.86674	4.25544	20
17	p11.2	SMCR2	NR_131243	17577340	17581002	0.816516	0.816697	BLCA	17p	del	tel	p	1	p	0.95	16621758	17671402	0.769485	0.821146	0.479932	5.22649e-12	11.2818	1.35911e-09	8.86674	4.25544	20
17	p11.2	RAI1	NM_030665	17584786	17714765	0.816883	0.82328	BLCA	17p	del	tel	p	1	p	0.95	16621758	17671402	0.769485	0.821146	0.479932	5.22649e-12	11.2818	1.35911e-09	8.86674	4.25544	20
17	p11.2	RAI1-AS1	NR_130894	17662467	17669616	0.820706	0.821058	BLCA	17p	del	tel	p	1	p	0.95	16621758	17671402	0.769485	0.821146	0.479932	5.22649e-12	11.2818	1.35911e-09	8.86674	4.25544	20
5	q12.1	PDE4D	NM_001165899	58264865	59783925	0.937498	0.925834	BLCA	5q	del	tel	p	1	p	0.95	59187580	61520132	0.912503	0.930413	0.423087	3.35021e-10	9.47493	6.86924e-08	7.16309	3.03061	13
5	q12.1	PART1	NR_024617	59783539	59843484	0.925837	0.925377	BLCA	5q	del	tel	p	1	p	0.95	59187580	61520132	0.912503	0.930413	0.423087	3.35021e-10	9.47493	6.86924e-08	7.16309	3.03061	13
5	q12.1	DEPDC1B	NM_001145208	59892738	59995993	0.924998	0.924206	BLCA	5q	del	tel	p	1	p	0.95	59187580	61520132	0.912503	0.930413	0.423087	3.35021e-10	9.47493	6.86924e-08	7.16309	3.03061	13
5	q12.1	ELOVL7	NM_001297618	60047615	60140101	0.923809	0.923099	BLCA	5q	del	tel	p	1	p	0.95	59187580	61520132	0.912503	0.930413	0.423087	3.35021e-10	9.47493	6.86924e-08	7.16309	3.03061	13
5	q12.1	ERCC8	NM_001290285	60169658	60240905	0.922872	0.922325	BLCA	5q	del	tel	p	1	p	0.95	59187580	61520132	0.912503	0.930413	0.423087	3.35021e-10	9.47493	6.86924e-08	7.16309	3.03061	13
5	q12.1	NDUFAF2	NM_174889	60240955	60448864	0.922325	0.920728	BLCA	5q	del	tel	p	1	p	0.95	59187580	61520132	0.912503	0.930413	0.423087	3.35021e-10	9.47493	6.86924e-08	7.16309	3.03061	13
5	q12.1	SMIM15	NM_001048249	60453535	60458302	0.920692	0.920656	BLCA	5q	del	tel	p	1	p	0.95	59187580	61520132	0.912503	0.930413	0.423087	3.35021e-10	9.47493	6.86924e-08	7.16309	3.03061	13
5	q12.1	SMIM15-AS1	NR_109908	60458142	60527907	0.920657	0.920121	BLCA	5q	del	tel	p	1	p	0.95	59187580	61520132	0.912503	0.930413	0.423087	3.35021e-10	9.47493	6.86924e-08	7.16309	3.03061	13
5	q12.1	LINC02057	NR_146624	60546386	60560756	0.919979	0.919869	BLCA	5q	del	tel	p	1	p	0.95	59187580	61520132	0.912503	0.930413	0.423087	3.35021e-10	9.47493	6.86924e-08	7.16309	3.03061	13
5	q12.1	ZSWIM6	NM_020928	60628099	60841999	0.919352	0.91771	BLCA	5q	del	tel	p	1	p	0.95	59187580	61520132	0.912503	0.930413	0.423087	3.35021e-10	9.47493	6.86924e-08	7.16309	3.03061	13
5	q12.1	C5orf64	NR_126525	60933607	61026824	0.917006	0.91629	BLCA	5q	del	tel	p	1	p	0.95	59187580	61520132	0.912503	0.930413	0.423087	3.35021e-10	9.47493	6.86924e-08	7.16309	3.03061	13
5	q12.1	LOC101928651	NR_109910	60958984	60994259	0.916811	0.91654	BLCA	5q	del	tel	p	1	p	0.95	59187580	61520132	0.912503	0.930413	0.423087	3.35021e-10	9.47493	6.86924e-08	7.16309	3.03061	13
5	q12.1	C5orf64-AS1	NR_105000	61028616	61031525	0.916277	0.916254	BLCA	5q	del	tel	p	1	p	0.95	59187580	61520132	0.912503	0.930413	0.423087	3.35021e-10	9.47493	6.86924e-08	7.16309	3.03061	13
2	q31.3	UBE2E3	NM_001278555	181845111	181928154	0.412079	0.411514	BLCA	2q	del	tel	n	1	n	0.95	181830637	188391120	0.367589	0.412177	0.299265	2.025e-10	9.69358	4.25663e-08	7.37093	2.20586	27
2	q31.3	LINC01934	NR_130784	181988563	182264280	0.411104	0.40923	BLCA	2q	del	tel	n	1	n	0.95	181830637	188391120	0.367589	0.412177	0.299265	2.025e-10	9.69358	4.25663e-08	7.37093	2.20586	27
2	q31.3	MIR4437	NR_039637	182170319	182170379	0.409869	0.409868	BLCA	2q	del	tel	n	1	n	0.95	181830637	188391120	0.367589	0.412177	0.299265	2.025e-10	9.69358	4.25663e-08	7.37093	2.20586	27
2	q31.3	ITGA4	NM_000885	182321618	182403655	0.40884	0.408283	BLCA	2q	del	tel	n	1	n	0.95	181830637	188391120	0.367589	0.412177	0.299265	2.025e-10	9.69358	4.25663e-08	7.37093	2.20586	27
2	q31.3	CERKL	NM_201548	182401400	182521834	0.408298	0.407479	BLCA	2q	del	tel	n	1	n	0.95	181830637	188391120	0.367589	0.412177	0.299265	2.025e-10	9.69358	4.25663e-08	7.37093	2.20586	27
2	q31.3	NEUROD1	NR_146176	182533021	182545392	0.407403	0.407319	BLCA	2q	del	tel	n	1	n	0.95	181830637	188391120	0.367589	0.412177	0.299265	2.025e-10	9.69358	4.25663e-08	7.37093	2.20586	27
2	q31.3	SSFA2	NM_001287503	182756442	182795464	0.405885	0.40562	BLCA	2q	del	tel	n	1	n	0.95	181830637	188391120	0.367589	0.412177	0.299265	2.025e-10	9.69358	4.25663e-08	7.37093	2.20586	27
2	q31.3	PPP1R1C	NR_048567	182818967	182982483	0.40546	0.404349	BLCA	2q	del	tel	n	1	n	0.95	181830637	188391120	0.367589	0.412177	0.299265	2.025e-10	9.69358	4.25663e-08	7.37093	2.20586	27
2	q32.1	PDE1A	NM_001258312	183004761	183387572	0.404197	0.401595	BLCA	2q	del	tel	n	1	n	0.95	181830637	188391120	0.367589	0.412177	0.299265	2.025e-10	9.69358	4.25663e-08	7.37093	2.20586	27
2	q32.1	DNAJC10	NM_001271581	183580767	183644750	0.400282	0.399848	BLCA	2q	del	tel	n	1	n	0.95	181830637	188391120	0.367589	0.412177	0.299265	2.025e-10	9.69358	4.25663e-08	7.37093	2.20586	27
2	q32.1	FRZB	NM_001463	183698004	183731498	0.399486	0.399258	BLCA	2q	del	tel	n	1	n	0.95	181830637	188391120	0.367589	0.412177	0.299265	2.025e-10	9.69358	4.25663e-08	7.37093	2.20586	27
2	q32.1	NCKAP1	NM_205842	183789578	183903586	0.398863	0.398088	BLCA	2q	del	tel	n	1	n	0.95	181830637	188391120	0.367589	0.412177	0.299265	2.025e-10	9.69358	4.25663e-08	7.37093	2.20586	27
2	q32.1	DUSP19	NM_001142314	183943286	183964722	0.397819	0.397673	BLCA	2q	del	tel	n	1	n	0.95	181830637	188391120	0.367589	0.412177	0.299265	2.025e-10	9.69358	4.25663e-08	7.37093	2.20586	27
2	q32.1	NUP35	NM_001287584	183982217	184026412	0.397554	0.397254	BLCA	2q	del	tel	n	1	n	0.95	181830637	188391120	0.367589	0.412177	0.299265	2.025e-10	9.69358	4.25663e-08	7.37093	2.20586	27
2	q32.1	MIR548AE1	NR_039638	185243701	185243771	0.38898	0.38898	BLCA	2q	del	tel	n	1	n	0.95	181830637	188391120	0.367589	0.412177	0.299265	2.025e-10	9.69358	4.25663e-08	7.37093	2.20586	27
2	q32.1	ZNF804A	NM_194250	185463092	185804214	0.387489	0.385171	BLCA	2q	del	tel	n	1	n	0.95	181830637	188391120	0.367589	0.412177	0.299265	2.025e-10	9.69358	4.25663e-08	7.37093	2.20586	27
2	q32.1	LOC105373782	NR_136319	186029680	186031799	0.383638	0.383624	BLCA	2q	del	tel	n	1	n	0.95	181830637	188391120	0.367589	0.412177	0.299265	2.025e-10	9.69358	4.25663e-08	7.37093	2.20586	27
2	q32.1	LOC101927196	NR_110217	186584600	186605204	0.379867	0.379727	BLCA	2q	del	tel	n	1	n	0.95	181830637	188391120	0.367589	0.412177	0.299265	2.025e-10	9.69358	4.25663e-08	7.37093	2.20586	27
2	q32.1	FSIP2	NM_173651	186603621	186698016	0.379738	0.379096	BLCA	2q	del	tel	n	1	n	0.95	181830637	188391120	0.367589	0.412177	0.299265	2.025e-10	9.69358	4.25663e-08	7.37093	2.20586	27
2	q32.1	FSIP2-AS1	NR_144453	186648417	186664877	0.379433	0.379321	BLCA	2q	del	tel	n	1	n	0.95	181830637	188391120	0.367589	0.412177	0.299265	2.025e-10	9.69358	4.25663e-08	7.37093	2.20586	27
2	q32.1	LINC01473	NR_110218	186898260	186951044	0.377735	0.377376	BLCA	2q	del	tel	n	1	n	0.95	181830637	188391120	0.367589	0.412177	0.299265	2.025e-10	9.69358	4.25663e-08	7.37093	2.20586	27
2	q32.1	ZC3H15	NM_018471	187350884	187374087	0.374659	0.374501	BLCA	2q	del	tel	n	1	n	0.95	181830637	188391120	0.367589	0.412177	0.299265	2.025e-10	9.69358	4.25663e-08	7.37093	2.20586	27
2	q32.1	ITGAV	NM_001145000	187454789	187545629	0.373953	0.373335	BLCA	2q	del	tel	n	1	n	0.95	181830637	188391120	0.367589	0.412177	0.299265	2.025e-10	9.69358	4.25663e-08	7.37093	2.20586	27
2	q32.1	FAM171B	NM_177454	187558788	187628512	0.373246	0.372772	BLCA	2q	del	tel	n	1	n	0.95	181830637	188391120	0.367589	0.412177	0.299265	2.025e-10	9.69358	4.25663e-08	7.37093	2.20586	27
2	q32.1	ZSWIM2	NM_182521	187692206	187713897	0.372339	0.372192	BLCA	2q	del	tel	n	1	n	0.95	181830637	188391120	0.367589	0.412177	0.299265	2.025e-10	9.69358	4.25663e-08	7.37093	2.20586	27
2	q32.1	CALCRL	NM_005795	188206689	188313021	0.368842	0.36812	BLCA	2q	del	tel	n	1	n	0.95	181830637	188391120	0.367589	0.412177	0.299265	2.025e-10	9.69358	4.25663e-08	7.37093	2.20586	27
2	q32.1	TFPI	NM_001329239	188328956	188419232	0.368011	0.367398	BLCA	2q	del	tel	n	1	n	0.95	181830637	188391120	0.367589	0.412177	0.299265	2.025e-10	9.69358	4.25663e-08	7.37093	2.20586	27
16	p13.3	ADCY9	NM_001116	4012649	4166186	0.107677	0.112599	BLCA	16p	del	tel	p	2	n-lp	0.95	4125795	5861006	0.111304	0.166925	0.459547	1.50152e-07	6.82347	1.98894e-05	4.70138	2.1605	36
16	p13.3	SRL	NM_001323667	4239374	4292081	0.114945	0.116634	BLCA	16p	del	tel	p	2	n-lp	0.95	4125795	5861006	0.111304	0.166925	0.459547	1.50152e-07	6.82347	1.98894e-05	4.70138	2.1605	36
16	p13.3	LINC01569	NR_039999	4295825	4303790	0.116754	0.11701	BLCA	16p	del	tel	p	2	n-lp	0.95	4125795	5861006	0.111304	0.166925	0.459547	1.50152e-07	6.82347	1.98894e-05	4.70138	2.1605	36
16	p13.3	TFAP4	NM_003223	4307186	4323001	0.117119	0.117625	BLCA	16p	del	tel	p	2	n-lp	0.95	4125795	5861006	0.111304	0.166925	0.459547	1.50152e-07	6.82347	1.98894e-05	4.70138	2.1605	36
16	p13.3	GLIS2	NM_001318918	4364761	4389598	0.118964	0.11976	BLCA	16p	del	tel	p	2	n-lp	0.95	4125795	5861006	0.111304	0.166925	0.459547	1.50152e-07	6.82347	1.98894e-05	4.70138	2.1605	36
16	p13.3	GLIS2-AS1	NR_110901	4374648	4378341	0.119281	0.119399	BLCA	16p	del	tel	p	2	n-lp	0.95	4125795	5861006	0.111304	0.166925	0.459547	1.50152e-07	6.82347	1.98894e-05	4.70138	2.1605	36
16	p13.3	PAM16	NM_016069	4390249	4401400	0.119781	0.120139	BLCA	16p	del	tel	p	2	n-lp	0.95	4125795	5861006	0.111304	0.166925	0.459547	1.50152e-07	6.82347	1.98894e-05	4.70138	2.1605	36
16	p13.3	CORO7-PAM16	NM_001201479	4390251	4466962	0.119781	0.12224	BLCA	16p	del	tel	p	2	n-lp	0.95	4125795	5861006	0.111304	0.166925	0.459547	1.50152e-07	6.82347	1.98894e-05	4.70138	2.1605	36
16	p13.3	CORO7	NM_001201472	4404542	4466962	0.120239	0.12224	BLCA	16p	del	tel	p	2	n-lp	0.95	4125795	5861006	0.111304	0.166925	0.459547	1.50152e-07	6.82347	1.98894e-05	4.70138	2.1605	36
16	p13.3	VASN	NM_138440	4421848	4433529	0.120794	0.121168	BLCA	16p	del	tel	p	2	n-lp	0.95	4125795	5861006	0.111304	0.166925	0.459547	1.50152e-07	6.82347	1.98894e-05	4.70138	2.1605	36
16	p13.3	DNAJA3	NM_001286516	4475805	4506775	0.122524	0.123516	BLCA	16p	del	tel	p	2	n-lp	0.95	4125795	5861006	0.111304	0.166925	0.459547	1.50152e-07	6.82347	1.98894e-05	4.70138	2.1605	36
16	p13.3	NMRAL1	NM_001351994	4511680	4526338	0.123673	0.124143	BLCA	16p	del	tel	p	2	n-lp	0.95	4125795	5861006	0.111304	0.166925	0.459547	1.50152e-07	6.82347	1.98894e-05	4.70138	2.1605	36
16	p13.3	HMOX2	NM_001127206	4524703	4560348	0.124091	0.125234	BLCA	16p	del	tel	p	2	n-lp	0.95	4125795	5861006	0.111304	0.166925	0.459547	1.50152e-07	6.82347	1.98894e-05	4.70138	2.1605	36
16	p13.3	CDIP1	NM_001199056	4560676	4588816	0.125244	0.126146	BLCA	16p	del	tel	p	2	n-lp	0.95	4125795	5861006	0.111304	0.166925	0.459547	1.50152e-07	6.82347	1.98894e-05	4.70138	2.1605	36
16	p13.3	C16orf96	NM_001145011	4606490	4650318	0.126713	0.128117	BLCA	16p	del	tel	p	2	n-lp	0.95	4125795	5861006	0.111304	0.166925	0.459547	1.50152e-07	6.82347	1.98894e-05	4.70138	2.1605	36
16	p13.3	UBALD1	NM_001330467	4658883	4664927	0.128392	0.128586	BLCA	16p	del	tel	p	2	n-lp	0.95	4125795	5861006	0.111304	0.166925	0.459547	1.50152e-07	6.82347	1.98894e-05	4.70138	2.1605	36
16	p13.3	MGRN1	NR_102267	4674824	4740975	0.128903	0.131023	BLCA	16p	del	tel	p	2	n-lp	0.95	4125795	5861006	0.111304	0.166925	0.459547	1.50152e-07	6.82347	1.98894e-05	4.70138	2.1605	36
16	p13.3	MIR6769A	NR_106827	4721318	4721391	0.130393	0.130396	BLCA	16p	del	tel	p	2	n-lp	0.95	4125795	5861006	0.111304	0.166925	0.459547	1.50152e-07	6.82347	1.98894e-05	4.70138	2.1605	36
16	p13.3	NUDT16L1	NM_032349	4743693	4745860	0.131111	0.13118	BLCA	16p	del	tel	p	2	n-lp	0.95	4125795	5861006	0.111304	0.166925	0.459547	1.50152e-07	6.82347	1.98894e-05	4.70138	2.1605	36
16	p13.3	ANKS3	NR_040252	4746510	4784378	0.131201	0.132415	BLCA	16p	del	tel	p	2	n-lp	0.95	4125795	5861006	0.111304	0.166925	0.459547	1.50152e-07	6.82347	1.98894e-05	4.70138	2.1605	36
16	p13.3	C16orf71	NM_139170	4784288	4799397	0.132412	0.132896	BLCA	16p	del	tel	p	2	n-lp	0.95	4125795	5861006	0.111304	0.166925	0.459547	1.50152e-07	6.82347	1.98894e-05	4.70138	2.1605	36
16	p13.3	ZNF500	NM_021646	4798392	4817219	0.132864	0.133467	BLCA	16p	del	tel	p	2	n-lp	0.95	4125795	5861006	0.111304	0.166925	0.459547	1.50152e-07	6.82347	1.98894e-05	4.70138	2.1605	36
16	p13.3	SEPT12	NM_144605	4827614	4838522	0.133801	0.13415	BLCA	16p	del	tel	p	2	n-lp	0.95	4125795	5861006	0.111304	0.166925	0.459547	1.50152e-07	6.82347	1.98894e-05	4.70138	2.1605	36
16	p13.3	SMIM22	NM_001253790	4838397	4846492	0.134146	0.134406	BLCA	16p	del	tel	p	2	n-lp	0.95	4125795	5861006	0.111304	0.166925	0.459547	1.50152e-07	6.82347	1.98894e-05	4.70138	2.1605	36
16	p13.3	ROGDI	NR_046480	4846962	4852951	0.134421	0.134613	BLCA	16p	del	tel	p	2	n-lp	0.95	4125795	5861006	0.111304	0.166925	0.459547	1.50152e-07	6.82347	1.98894e-05	4.70138	2.1605	36
16	p13.3	GLYR1	NR_136695	4853203	4897389	0.134621	0.136037	BLCA	16p	del	tel	p	2	n-lp	0.95	4125795	5861006	0.111304	0.166925	0.459547	1.50152e-07	6.82347	1.98894e-05	4.70138	2.1605	36
16	p13.3	UBN1	NM_001079514	4897631	4932402	0.136045	0.13716	BLCA	16p	del	tel	p	2	n-lp	0.95	4125795	5861006	0.111304	0.166925	0.459547	1.50152e-07	6.82347	1.98894e-05	4.70138	2.1605	36
16	p13.3	PPL	NM_002705	4932507	4987136	0.137163	0.138914	BLCA	16p	del	tel	p	2	n-lp	0.95	4125795	5861006	0.111304	0.166925	0.459547	1.50152e-07	6.82347	1.98894e-05	4.70138	2.1605	36
16	p13.3	SEC14L5	NM_014692	5008317	5069156	0.139593	0.141543	BLCA	16p	del	tel	p	2	n-lp	0.95	4125795	5861006	0.111304	0.166925	0.459547	1.50152e-07	6.82347	1.98894e-05	4.70138	2.1605	36
16	p13.3	NAGPA	NM_016256	5074844	5083942	0.141725	0.142017	BLCA	16p	del	tel	p	2	n-lp	0.95	4125795	5861006	0.111304	0.166925	0.459547	1.50152e-07	6.82347	1.98894e-05	4.70138	2.1605	36
16	p13.3	NAGPA-AS1	NR_038913	5083702	5092972	0.142009	0.142307	BLCA	16p	del	tel	p	2	n-lp	0.95	4125795	5861006	0.111304	0.166925	0.459547	1.50152e-07	6.82347	1.98894e-05	4.70138	2.1605	36
16	p13.3	C16orf89	NM_152459	5094122	5116146	0.142343	0.143049	BLCA	16p	del	tel	p	2	n-lp	0.95	4125795	5861006	0.111304	0.166925	0.459547	1.50152e-07	6.82347	1.98894e-05	4.70138	2.1605	36
16	p13.3	ALG1	NM_019109	5121809	5137380	0.143231	0.14373	BLCA	16p	del	tel	p	2	n-lp	0.95	4125795	5861006	0.111304	0.166925	0.459547	1.50152e-07	6.82347	1.98894e-05	4.70138	2.1605	36
16	p13.3	EEF2KMT	NM_001289029	5134300	5147821	0.143631	0.144065	BLCA	16p	del	tel	p	2	n-lp	0.95	4125795	5861006	0.111304	0.166925	0.459547	1.50152e-07	6.82347	1.98894e-05	4.70138	2.1605	36
16	p13.3	LINC01570	NR_110902	5651169	5666251	0.160199	0.160683	BLCA	16p	del	tel	p	2	n-lp	0.95	4125795	5861006	0.111304	0.166925	0.459547	1.50152e-07	6.82347	1.98894e-05	4.70138	2.1605	36
16	p13.3	MIR8065	NR_107032	5682467	5682567	0.161203	0.161206	BLCA	16p	del	tel	p	2	n-lp	0.95	4125795	5861006	0.111304	0.166925	0.459547	1.50152e-07	6.82347	1.98894e-05	4.70138	2.1605	36
2	q34	LINC01878	NR_131941	213660054	213683987	0.195848	0.195686	BLCA	2q	del	tel	p	2	n-lp	0.95	213469492	218103135	0.165651	0.197143	0.332905	7.77097e-09	8.10952	1.29182e-06	5.8888	1.96041	33
2	q34	MIR4776-1	NR_039935	213790980	213791060	0.194958	0.194958	BLCA	2q	del	tel	p	2	n-lp	0.95	213469492	218103135	0.165651	0.197143	0.332905	7.77097e-09	8.10952	1.29182e-06	5.8888	1.96041	33
2	q34	MIR4776-2	NR_039936	213790980	213791060	0.194958	0.194958	BLCA	2q	del	tel	p	2	n-lp	0.95	213469492	218103135	0.165651	0.197143	0.332905	7.77097e-09	8.10952	1.29182e-06	5.8888	1.96041	33
2	q34	IKZF2	NM_001079526	213864410	214016333	0.194459	0.193427	BLCA	2q	del	tel	p	2	n-lp	0.95	213469492	218103135	0.165651	0.197143	0.332905	7.77097e-09	8.10952	1.29182e-06	5.8888	1.96041	33
2	q34	LINC01953	NR_146974	214020539	214032434	0.193398	0.193317	BLCA	2q	del	tel	p	2	n-lp	0.95	213469492	218103135	0.165651	0.197143	0.332905	7.77097e-09	8.10952	1.29182e-06	5.8888	1.96041	33
2	q34	LOC100130451	NM_001242575	214140509	214148933	0.192583	0.192526	BLCA	2q	del	tel	p	2	n-lp	0.95	213469492	218103135	0.165651	0.197143	0.332905	7.77097e-09	8.10952	1.29182e-06	5.8888	1.96041	33
2	q34	SPAG16	NR_047659	214149102	215275225	0.192524	0.184871	BLCA	2q	del	tel	p	2	n-lp	0.95	213469492	218103135	0.165651	0.197143	0.332905	7.77097e-09	8.10952	1.29182e-06	5.8888	1.96041	33
2	q34	MIR4438	NR_039640	214622790	214622883	0.189305	0.189304	BLCA	2q	del	tel	p	2	n-lp	0.95	213469492	218103135	0.165651	0.197143	0.332905	7.77097e-09	8.10952	1.29182e-06	5.8888	1.96041	33
2	q35	VWC2L	NM_001080500	215276291	215443676	0.184863	0.183726	BLCA	2q	del	tel	p	2	n-lp	0.95	213469492	218103135	0.165651	0.197143	0.332905	7.77097e-09	8.10952	1.29182e-06	5.8888	1.96041	33
2	q35	VWC2L-IT1	NR_047698	215374905	215401613	0.184193	0.184012	BLCA	2q	del	tel	p	2	n-lp	0.95	213469492	218103135	0.165651	0.197143	0.332905	7.77097e-09	8.10952	1.29182e-06	5.8888	1.96041	33
2	q35	BARD1	NM_001282545	215590369	215674435	0.182729	0.182157	BLCA	2q	del	tel	p	2	n-lp	0.95	213469492	218103135	0.165651	0.197143	0.332905	7.77097e-09	8.10952	1.29182e-06	5.8888	1.96041	33
2	q35	LOC101928103	NR_110292	215674952	215828329	0.182154	0.181112	BLCA	2q	del	tel	p	2	n-lp	0.95	213469492	218103135	0.165651	0.197143	0.332905	7.77097e-09	8.10952	1.29182e-06	5.8888	1.96041	33
2	q35	SNORA70I	NR_145773	215711670	215711805	0.181904	0.181904	BLCA	2q	del	tel	p	2	n-lp	0.95	213469492	218103135	0.165651	0.197143	0.332905	7.77097e-09	8.10952	1.29182e-06	5.8888	1.96041	33
2	q35	ABCA12	NR_103740	215796265	216003151	0.181329	0.179923	BLCA	2q	del	tel	p	2	n-lp	0.95	213469492	218103135	0.165651	0.197143	0.332905	7.77097e-09	8.10952	1.29182e-06	5.8888	1.96041	33
2	q35	ATIC	NM_004044	216176678	216214496	0.178744	0.178487	BLCA	2q	del	tel	p	2	n-lp	0.95	213469492	218103135	0.165651	0.197143	0.332905	7.77097e-09	8.10952	1.29182e-06	5.8888	1.96041	33
2	q35	FN1	NM_001306131	216225162	216300793	0.178414	0.1779	BLCA	2q	del	tel	p	2	n-lp	0.95	213469492	218103135	0.165651	0.197143	0.332905	7.77097e-09	8.10952	1.29182e-06	5.8888	1.96041	33
2	q35	LOC102724849	NR_110607	216318429	216328591	0.177781	0.177712	BLCA	2q	del	tel	p	2	n-lp	0.95	213469492	218103135	0.165651	0.197143	0.332905	7.77097e-09	8.10952	1.29182e-06	5.8888	1.96041	33
2	q35	LINC00607	NR_037195	216476285	216708259	0.176708	0.175131	BLCA	2q	del	tel	p	2	n-lp	0.95	213469492	218103135	0.165651	0.197143	0.332905	7.77097e-09	8.10952	1.29182e-06	5.8888	1.96041	33
2	q35	LINC01614	NR_132383	216582765	216585669	0.175984	0.175964	BLCA	2q	del	tel	p	2	n-lp	0.95	213469492	218103135	0.165651	0.197143	0.332905	7.77097e-09	8.10952	1.29182e-06	5.8888	1.96041	33
2	q35	MREG	NM_018000	216807313	216878346	0.174458	0.173975	BLCA	2q	del	tel	p	2	n-lp	0.95	213469492	218103135	0.165651	0.197143	0.332905	7.77097e-09	8.10952	1.29182e-06	5.8888	1.96041	33
2	q35	PECR	NM_018441	216903110	216946539	0.173807	0.173512	BLCA	2q	del	tel	p	2	n-lp	0.95	213469492	218103135	0.165651	0.197143	0.332905	7.77097e-09	8.10952	1.29182e-06	5.8888	1.96041	33
2	q35	TMEM169	NM_001142311	216946588	216967506	0.173511	0.173369	BLCA	2q	del	tel	p	2	n-lp	0.95	213469492	218103135	0.165651	0.197143	0.332905	7.77097e-09	8.10952	1.29182e-06	5.8888	1.96041	33
2	q35	XRCC5	NM_021141	216974019	217071016	0.173325	0.172666	BLCA	2q	del	tel	p	2	n-lp	0.95	213469492	218103135	0.165651	0.197143	0.332905	7.77097e-09	8.10952	1.29182e-06	5.8888	1.96041	33
2	q35	LINC01963	NR_037701	217081611	217084915	0.172594	0.172571	BLCA	2q	del	tel	p	2	n-lp	0.95	213469492	218103135	0.165651	0.197143	0.332905	7.77097e-09	8.10952	1.29182e-06	5.8888	1.96041	33
2	q35	MARCH4	NM_020814	217122584	217236750	0.172315	0.171539	BLCA	2q	del	tel	p	2	n-lp	0.95	213469492	218103135	0.165651	0.197143	0.332905	7.77097e-09	8.10952	1.29182e-06	5.8888	1.96041	33
2	q35	SMARCAL1	NM_014140	217277136	217347774	0.171265	0.170785	BLCA	2q	del	tel	p	2	n-lp	0.95	213469492	218103135	0.165651	0.197143	0.332905	7.77097e-09	8.10952	1.29182e-06	5.8888	1.96041	33
2	q35	RPL37A	NM_000998	217363519	217366188	0.170678	0.170659	BLCA	2q	del	tel	p	2	n-lp	0.95	213469492	218103135	0.165651	0.197143	0.332905	7.77097e-09	8.10952	1.29182e-06	5.8888	1.96041	33
2	q35	LINC01280	NR_110392	217454715	217471661	0.170058	0.169943	BLCA	2q	del	tel	p	2	n-lp	0.95	213469492	218103135	0.165651	0.197143	0.332905	7.77097e-09	8.10952	1.29182e-06	5.8888	1.96041	33
2	q35	IGFBP2	NM_001313992	217497550	217529158	0.169767	0.169552	BLCA	2q	del	tel	p	2	n-lp	0.95	213469492	218103135	0.165651	0.197143	0.332905	7.77097e-09	8.10952	1.29182e-06	5.8888	1.96041	33
2	q35	IGFBP5	NM_000599	217536827	217560272	0.1695	0.16934	BLCA	2q	del	tel	p	2	n-lp	0.95	213469492	218103135	0.165651	0.197143	0.332905	7.77097e-09	8.10952	1.29182e-06	5.8888	1.96041	33
2	q35	TNP1	NM_003284	217724181	217724782	0.168226	0.168222	BLCA	2q	del	tel	p	2	n-lp	0.95	213469492	218103135	0.165651	0.197143	0.332905	7.77097e-09	8.10952	1.29182e-06	5.8888	1.96041	33
2	q35	LOC105373876	NR_135525	217731054	217732532	0.16818	0.16817	BLCA	2q	del	tel	p	2	n-lp	0.95	213469492	218103135	0.165651	0.197143	0.332905	7.77097e-09	8.10952	1.29182e-06	5.8888	1.96041	33
2	q35	LINC01921	NR_130782	217735494	217736362	0.168149	0.168144	BLCA	2q	del	tel	p	2	n-lp	0.95	213469492	218103135	0.165651	0.197143	0.332905	7.77097e-09	8.10952	1.29182e-06	5.8888	1.96041	33
3	p13	FOXP1	NM_001244810	71003864	71633140	0.779298	0.786427	BLCA	3p	del	tel	p	1	p	0.95	71432139	79525026	0.78415	0.87583	0.424054	0.000122299	3.91258	0.00828404	2.08176	0.882778	30
3	p13	MIR1284	NR_031697	71591120	71591240	0.785951	0.785952	BLCA	3p	del	tel	p	1	p	0.95	71432139	79525026	0.78415	0.87583	0.424054	0.000122299	3.91258	0.00828404	2.08176	0.882778	30
3	p13	EIF4E3	NM_173359	71728439	71803924	0.787506	0.788362	BLCA	3p	del	tel	p	1	p	0.95	71432139	79525026	0.78415	0.87583	0.424054	0.000122299	3.91258	0.00828404	2.08176	0.882778	30
3	p13	GPR27	NM_018971	71802874	71805531	0.78835	0.78838	BLCA	3p	del	tel	p	1	p	0.95	71432139	79525026	0.78415	0.87583	0.424054	0.000122299	3.91258	0.00828404	2.08176	0.882778	30
3	p13	PROK2	NM_021935	71820805	71834357	0.788553	0.788706	BLCA	3p	del	tel	p	1	p	0.95	71432139	79525026	0.78415	0.87583	0.424054	0.000122299	3.91258	0.00828404	2.08176	0.882778	30
3	p13	LINC00877	NR_104116	72084669	72149606	0.791542	0.792278	BLCA	3p	del	tel	p	1	p	0.95	71432139	79525026	0.78415	0.87583	0.424054	0.000122299	3.91258	0.00828404	2.08176	0.882778	30
3	p13	LINC00870	NR_038221	72200407	72223490	0.792853	0.793115	BLCA	3p	del	tel	p	1	p	0.95	71432139	79525026	0.78415	0.87583	0.424054	0.000122299	3.91258	0.00828404	2.08176	0.882778	30
3	p13	RYBP	NM_012234	72423743	72495774	0.795383	0.796199	BLCA	3p	del	tel	p	1	p	0.95	71432139	79525026	0.78415	0.87583	0.424054	0.000122299	3.91258	0.00828404	2.08176	0.882778	30
3	p13	LOC105377162	NR_135531	72712446	72713400	0.798654	0.798665	BLCA	3p	del	tel	p	1	p	0.95	71432139	79525026	0.78415	0.87583	0.424054	0.000122299	3.91258	0.00828404	2.08176	0.882778	30
3	p13	SHQ1	NM_018130	72798427	72897598	0.799628	0.800751	BLCA	3p	del	tel	p	1	p	0.95	71432139	79525026	0.78415	0.87583	0.424054	0.000122299	3.91258	0.00828404	2.08176	0.882778	30
3	p13	GXYLT2	NR_138564	72937384	73024522	0.801202	0.802189	BLCA	3p	del	tel	p	1	p	0.95	71432139	79525026	0.78415	0.87583	0.424054	0.000122299	3.91258	0.00828404	2.08176	0.882778	30
3	p13	PPP4R2	NM_001318026	73045893	73118352	0.802431	0.803252	BLCA	3p	del	tel	p	1	p	0.95	71432139	79525026	0.78415	0.87583	0.424054	0.000122299	3.91258	0.00828404	2.08176	0.882778	30
3	p13	EBLN2	NM_018029	73110809	73112471	0.803167	0.803185	BLCA	3p	del	tel	p	1	p	0.95	71432139	79525026	0.78415	0.87583	0.424054	0.000122299	3.91258	0.00828404	2.08176	0.882778	30
3	p13	PDZRN3	NM_015009	73431580	73674072	0.8068	0.809547	BLCA	3p	del	tel	p	1	p	0.95	71432139	79525026	0.78415	0.87583	0.424054	0.000122299	3.91258	0.00828404	2.08176	0.882778	30
3	p13	LOC101927296	NR_121660	73570472	73618925	0.808374	0.808923	BLCA	3p	del	tel	p	1	p	0.95	71432139	79525026	0.78415	0.87583	0.424054	0.000122299	3.91258	0.00828404	2.08176	0.882778	30
3	p13	PDZRN3-AS1	NR_046681	73672718	73677050	0.809532	0.809581	BLCA	3p	del	tel	p	1	p	0.95	71432139	79525026	0.78415	0.87583	0.424054	0.000122299	3.91258	0.00828404	2.08176	0.882778	30
3	p13	LINC02005	NR_146637	73858394	73928771	0.811636	0.812433	BLCA	3p	del	tel	p	1	p	0.95	71432139	79525026	0.78415	0.87583	0.424054	0.000122299	3.91258	0.00828404	2.08176	0.882778	30
3	p12.3	CNTN3	NM_020872	74311719	74570291	0.816771	0.8197	BLCA	3p	del	tel	p	1	p	0.95	71432139	79525026	0.78415	0.87583	0.424054	0.000122299	3.91258	0.00828404	2.08176	0.882778	30
3	p12.3	FAM86DP	NR_024241	75470702	75484266	0.8299	0.830054	BLCA	3p	del	tel	p	1	p	0.95	71432139	79525026	0.78415	0.87583	0.424054	0.000122299	3.91258	0.00828404	2.08176	0.882778	30
3	p12.3	LINC02018	NR_151705	75484458	75561328	0.830056	0.830927	BLCA	3p	del	tel	p	1	p	0.95	71432139	79525026	0.78415	0.87583	0.424054	0.000122299	3.91258	0.00828404	2.08176	0.882778	30
3	p12.3	MIR1324	NR_031714	75679913	75680009	0.832271	0.832272	BLCA	3p	del	tel	p	1	p	0.95	71432139	79525026	0.78415	0.87583	0.424054	0.000122299	3.91258	0.00828404	2.08176	0.882778	30
3	p12.3	FRG2C	NM_001124759	75713341	75716368	0.832649	0.832684	BLCA	3p	del	tel	p	1	p	0.95	71432139	79525026	0.78415	0.87583	0.424054	0.000122299	3.91258	0.00828404	2.08176	0.882778	30
3	p12.3	FRG2EP	NR_037925	75713480	75716368	0.832651	0.832684	BLCA	3p	del	tel	p	1	p	0.95	71432139	79525026	0.78415	0.87583	0.424054	0.000122299	3.91258	0.00828404	2.08176	0.882778	30
3	p12.3	LINC00960	NR_040005	75721431	75728454	0.832741	0.83282	BLCA	3p	del	tel	p	1	p	0.95	71432139	79525026	0.78415	0.87583	0.424054	0.000122299	3.91258	0.00828404	2.08176	0.882778	30
3	p12.3	ZNF717	NM_001290210	75779111	75834734	0.833394	0.834024	BLCA	3p	del	tel	p	1	p	0.95	71432139	79525026	0.78415	0.87583	0.424054	0.000122299	3.91258	0.00828404	2.08176	0.882778	30
3	p12.3	MIR4273	NR_036235	75787430	75787514	0.833489	0.833489	BLCA	3p	del	tel	p	1	p	0.95	71432139	79525026	0.78415	0.87583	0.424054	0.000122299	3.91258	0.00828404	2.08176	0.882778	30
3	p12.3	ROBO2	NM_002942	77089293	77699114	0.848237	0.855145	BLCA	3p	del	tel	p	1	p	0.95	71432139	79525026	0.78415	0.87583	0.424054	0.000122299	3.91258	0.00828404	2.08176	0.882778	30
3	p12.3	LINC02077	NR_146636	78087855	78098114	0.859549	0.859665	BLCA	3p	del	tel	p	1	p	0.95	71432139	79525026	0.78415	0.87583	0.424054	0.000122299	3.91258	0.00828404	2.08176	0.882778	30
3	p12.3	ROBO1	NM_002941	78646387	79817059	0.865876	0.879138	BLCA	3p	del	tel	p	1	p	0.95	71432139	79525026	0.78415	0.87583	0.424054	0.000122299	3.91258	0.00828404	2.08176	0.882778	30
3	p12.3	LOC101927374	NR_110133	79460876	79484377	0.875103	0.875369	BLCA	3p	del	tel	p	1	p	0.95	71432139	79525026	0.78415	0.87583	0.424054	0.000122299	3.91258	0.00828404	2.08176	0.882778	30
18	q12.1	NOL4	NM_001353237	31431063	31803515	0.7819	0.775524	BLCA	18q	del	tel	p	1	p	0.95	31617048	41273364	0.613423	0.778716	0.268511	1.30839e-05	4.88326	0.00115054	2.9391	0.78918	39
18	q12.1	DTNA	NM_032975	32073253	32471808	0.770907	0.764085	BLCA	18q	del	tel	p	1	p	0.95	31617048	41273364	0.613423	0.778716	0.268511	1.30839e-05	4.88326	0.00115054	2.9391	0.78918	39
18	q12.1	MAPRE2	NM_001143826	32556891	32723432	0.762628	0.759777	BLCA	18q	del	tel	p	1	p	0.95	31617048	41273364	0.613423	0.778716	0.268511	1.30839e-05	4.88326	0.00115054	2.9391	0.78918	39
18	q12.2	ZNF397	NM_032347	32820993	32838397	0.758107	0.757809	BLCA	18q	del	tel	p	1	p	0.95	31617048	41273364	0.613423	0.778716	0.268511	1.30839e-05	4.88326	0.00115054	2.9391	0.78918	39
18	q12.2	ZSCAN30	NM_001112734	32831021	32870209	0.757936	0.757265	BLCA	18q	del	tel	p	1	p	0.95	31617048	41273364	0.613423	0.778716	0.268511	1.30839e-05	4.88326	0.00115054	2.9391	0.78918	39
18	q12.2	ZNF271P	NR_024565	32870235	32890730	0.757264	0.756914	BLCA	18q	del	tel	p	1	p	0.95	31617048	41273364	0.613423	0.778716	0.268511	1.30839e-05	4.88326	0.00115054	2.9391	0.78918	39
18	q12.2	ZNF24	NM_006965	32912171	32924431	0.756547	0.756337	BLCA	18q	del	tel	p	1	p	0.95	31617048	41273364	0.613423	0.778716	0.268511	1.30839e-05	4.88326	0.00115054	2.9391	0.78918	39
18	q12.2	ZNF396	NM_145756	32946660	32957301	0.755956	0.755774	BLCA	18q	del	tel	p	1	p	0.95	31617048	41273364	0.613423	0.778716	0.268511	1.30839e-05	4.88326	0.00115054	2.9391	0.78918	39
18	q12.2	INO80C	NM_001098817	33048290	33077955	0.754217	0.753709	BLCA	18q	del	tel	p	1	p	0.95	31617048	41273364	0.613423	0.778716	0.268511	1.30839e-05	4.88326	0.00115054	2.9391	0.78918	39
18	q12.2	MIR3975	NR_039771	33171700	33171770	0.752104	0.752103	BLCA	18q	del	tel	p	1	p	0.95	31617048	41273364	0.613423	0.778716	0.268511	1.30839e-05	4.88326	0.00115054	2.9391	0.78918	39
18	q12.2	GALNT1	NM_020474	33234532	33291798	0.751029	0.750048	BLCA	18q	del	tel	p	1	p	0.95	31617048	41273364	0.613423	0.778716	0.268511	1.30839e-05	4.88326	0.00115054	2.9391	0.78918	39
18	q12.2	MIR187	NR_029616	33484780	33484889	0.746745	0.746743	BLCA	18q	del	tel	p	1	p	0.95	31617048	41273364	0.613423	0.778716	0.268511	1.30839e-05	4.88326	0.00115054	2.9391	0.78918	39
18	q12.2	MIR3929	NR_037497	33514050	33514105	0.746244	0.746243	BLCA	18q	del	tel	p	1	p	0.95	31617048	41273364	0.613423	0.778716	0.268511	1.30839e-05	4.88326	0.00115054	2.9391	0.78918	39
18	q12.2	C18orf21	NM_001201476	33552587	33559250	0.745584	0.74547	BLCA	18q	del	tel	p	1	p	0.95	31617048	41273364	0.613423	0.778716	0.268511	1.30839e-05	4.88326	0.00115054	2.9391	0.78918	39
18	q12.2	RPRD1A	NM_018170	33569786	33647557	0.74529	0.743959	BLCA	18q	del	tel	p	1	p	0.95	31617048	41273364	0.613423	0.778716	0.268511	1.30839e-05	4.88326	0.00115054	2.9391	0.78918	39
18	q12.2	SLC39A6	NM_012319	33688493	33709357	0.743258	0.742901	BLCA	18q	del	tel	p	1	p	0.95	31617048	41273364	0.613423	0.778716	0.268511	1.30839e-05	4.88326	0.00115054	2.9391	0.78918	39
18	q12.2	ELP2	NM_001242875	33709836	33757885	0.742893	0.74207	BLCA	18q	del	tel	p	1	p	0.95	31617048	41273364	0.613423	0.778716	0.268511	1.30839e-05	4.88326	0.00115054	2.9391	0.78918	39
18	q12.2	LOC101927809	NR_134605	33759963	33767398	0.742034	0.741907	BLCA	18q	del	tel	p	1	p	0.95	31617048	41273364	0.613423	0.778716	0.268511	1.30839e-05	4.88326	0.00115054	2.9391	0.78918	39
18	q12.2	MOCOS	NM_017947	33767172	33848685	0.741911	0.740516	BLCA	18q	del	tel	p	1	p	0.95	31617048	41273364	0.613423	0.778716	0.268511	1.30839e-05	4.88326	0.00115054	2.9391	0.78918	39
18	q12.2	FHOD3	NM_025135	33877658	34360183	0.74002	0.73176	BLCA	18q	del	tel	p	1	p	0.95	31617048	41273364	0.613423	0.778716	0.268511	1.30839e-05	4.88326	0.00115054	2.9391	0.78918	39
18	q12.2	LOC105372071	NR_132982	34240351	34243381	0.733811	0.73376	BLCA	18q	del	tel	p	1	p	0.95	31617048	41273364	0.613423	0.778716	0.268511	1.30839e-05	4.88326	0.00115054	2.9391	0.78918	39
18	q12.2	TPGS2	NM_001271956	34359987	34409179	0.731763	0.730921	BLCA	18q	del	tel	p	1	p	0.95	31617048	41273364	0.613423	0.778716	0.268511	1.30839e-05	4.88326	0.00115054	2.9391	0.78918	39
18	q12.2	KIAA1328	NR_136303	34409068	34812090	0.730923	0.724025	BLCA	18q	del	tel	p	1	p	0.95	31617048	41273364	0.613423	0.778716	0.268511	1.30839e-05	4.88326	0.00115054	2.9391	0.78918	39
18	q12.2	LOC105372069	NR_134585	34481907	34503777	0.729677	0.729302	BLCA	18q	del	tel	p	1	p	0.95	31617048	41273364	0.613423	0.778716	0.268511	1.30839e-05	4.88326	0.00115054	2.9391	0.78918	39
18	q12.2	CELF4	NM_001353706	34823007	35146000	0.723838	0.718309	BLCA	18q	del	tel	p	1	p	0.95	31617048	41273364	0.613423	0.778716	0.268511	1.30839e-05	4.88326	0.00115054	2.9391	0.78918	39
18	q12.2	LOC105372068	NR_134588	34854422	34856363	0.7233	0.723267	BLCA	18q	del	tel	p	1	p	0.95	31617048	41273364	0.613423	0.778716	0.268511	1.30839e-05	4.88326	0.00115054	2.9391	0.78918	39
18	q12.2	SNORA111	NR_132967	35046301	35046467	0.720015	0.720013	BLCA	18q	del	tel	p	1	p	0.95	31617048	41273364	0.613423	0.778716	0.268511	1.30839e-05	4.88326	0.00115054	2.9391	0.78918	39
18	q12.2	MIR4318	NR_036202	35237097	35237178	0.716749	0.716748	BLCA	18q	del	tel	p	1	p	0.95	31617048	41273364	0.613423	0.778716	0.268511	1.30839e-05	4.88326	0.00115054	2.9391	0.78918	39
18	q12.2	MIR924HG	NR_024391	36786887	37331959	0.690221	0.680891	BLCA	18q	del	tel	p	1	p	0.95	31617048	41273364	0.613423	0.778716	0.268511	1.30839e-05	4.88326	0.00115054	2.9391	0.78918	39
18	q12.3	MIR924	NR_030628	37202086	37202139	0.683114	0.683113	BLCA	18q	del	tel	p	1	p	0.95	31617048	41273364	0.613423	0.778716	0.268511	1.30839e-05	4.88326	0.00115054	2.9391	0.78918	39
18	q12.3	MIR5583-2	NR_049848	37256682	37256741	0.682179	0.682178	BLCA	18q	del	tel	p	1	p	0.95	31617048	41273364	0.613423	0.778716	0.268511	1.30839e-05	4.88326	0.00115054	2.9391	0.78918	39
18	q12.3	MIR5583-1	NR_049847	37256684	37256743	0.682179	0.682178	BLCA	18q	del	tel	p	1	p	0.95	31617048	41273364	0.613423	0.778716	0.268511	1.30839e-05	4.88326	0.00115054	2.9391	0.78918	39
18	q12.3	LINC01902	NR_151703	37421672	37469957	0.679355	0.678528	BLCA	18q	del	tel	p	1	p	0.95	31617048	41273364	0.613423	0.778716	0.268511	1.30839e-05	4.88326	0.00115054	2.9391	0.78918	39
18	q12.3	LINC01477	NR_110791	37646249	37679197	0.675511	0.674947	BLCA	18q	del	tel	p	1	p	0.95	31617048	41273364	0.613423	0.778716	0.268511	1.30839e-05	4.88326	0.00115054	2.9391	0.78918	39
18	q12.3	KC6	NR_002838	39060235	39100641	0.651307	0.650615	BLCA	18q	del	tel	p	1	p	0.95	31617048	41273364	0.613423	0.778716	0.268511	1.30839e-05	4.88326	0.00115054	2.9391	0.78918	39
18	q12.3	PIK3C3	NM_002647	39535162	39661446	0.643177	0.641015	BLCA	18q	del	tel	p	1	p	0.95	31617048	41273364	0.613423	0.778716	0.268511	1.30839e-05	4.88326	0.00115054	2.9391	0.78918	39
18	q12.3	LINC00907	NR_046174	39766632	40271389	0.639215	0.630575	BLCA	18q	del	tel	p	1	p	0.95	31617048	41273364	0.613423	0.778716	0.268511	1.30839e-05	4.88326	0.00115054	2.9391	0.78918	39
18	q12.3	RIT2	NM_002930	40323182	40695657	0.629688	0.623312	BLCA	18q	del	tel	p	1	p	0.95	31617048	41273364	0.613423	0.778716	0.268511	1.30839e-05	4.88326	0.00115054	2.9391	0.78918	39
18	q12.3	SYT4	NM_020783	40847856	40857615	0.620707	0.62054	BLCA	18q	del	tel	p	1	p	0.95	31617048	41273364	0.613423	0.778716	0.268511	1.30839e-05	4.88326	0.00115054	2.9391	0.78918	39
12	q24.13	RPH3A	NM_001347952	113012900	113336684	0.214487	0.21104	BLCA	12q	del	tel	n	1	n	0.95	113231973	120420669	0.135629	0.212155	0.379452	0.000150737	3.82178	0.00995183	2.0021	0.7597	57
12	q24.13	OAS1	NM_001320151	113344581	113369995	0.210956	0.210686	BLCA	12q	del	tel	n	1	n	0.95	113231973	120420669	0.135629	0.212155	0.379452	0.000150737	3.82178	0.00995183	2.0021	0.7597	57
12	q24.13	OAS3	NM_006187	113376237	113411055	0.210619	0.210249	BLCA	12q	del	tel	n	1	n	0.95	113231973	120420669	0.135629	0.212155	0.379452	0.000150737	3.82178	0.00995183	2.0021	0.7597	57
12	q24.13	OAS2	NM_016817	113416273	113449528	0.210193	0.209839	BLCA	12q	del	tel	n	1	n	0.95	113231973	120420669	0.135629	0.212155	0.379452	0.000150737	3.82178	0.00995183	2.0021	0.7597	57
12	q24.13	DTX1	NM_004416	113495661	113535833	0.209348	0.20892	BLCA	12q	del	tel	n	1	n	0.95	113231973	120420669	0.135629	0.212155	0.379452	0.000150737	3.82178	0.00995183	2.0021	0.7597	57
12	q24.13	RASAL1	NM_004658	113536623	113574044	0.208912	0.208514	BLCA	12q	del	tel	n	1	n	0.95	113231973	120420669	0.135629	0.212155	0.379452	0.000150737	3.82178	0.00995183	2.0021	0.7597	57
12	q24.13	CFAP73	NM_001144872	113587662	113597081	0.208369	0.208268	BLCA	12q	del	tel	n	1	n	0.95	113231973	120420669	0.135629	0.212155	0.379452	0.000150737	3.82178	0.00995183	2.0021	0.7597	57
12	q24.13	DDX54	NM_001111322	113594977	113623284	0.208291	0.207989	BLCA	12q	del	tel	n	1	n	0.95	113231973	120420669	0.135629	0.212155	0.379452	0.000150737	3.82178	0.00995183	2.0021	0.7597	57
12	q24.13	MIR7106	NR_106956	113596917	113596982	0.20827	0.208269	BLCA	12q	del	tel	n	1	n	0.95	113231973	120420669	0.135629	0.212155	0.379452	0.000150737	3.82178	0.00995183	2.0021	0.7597	57
12	q24.13	RITA1	NM_032848	113623330	113630173	0.207989	0.207916	BLCA	12q	del	tel	n	1	n	0.95	113231973	120420669	0.135629	0.212155	0.379452	0.000150737	3.82178	0.00995183	2.0021	0.7597	57
12	q24.13	IQCD	NM_138451	113633245	113658899	0.207883	0.20761	BLCA	12q	del	tel	n	1	n	0.95	113231973	120420669	0.135629	0.212155	0.379452	0.000150737	3.82178	0.00995183	2.0021	0.7597	57
12	q24.13	TPCN1	NM_001143819	113659242	113736389	0.207607	0.206785	BLCA	12q	del	tel	n	1	n	0.95	113231973	120420669	0.135629	0.212155	0.379452	0.000150737	3.82178	0.00995183	2.0021	0.7597	57
12	q24.13	MIR6762	NR_106820	113729327	113729413	0.206861	0.20686	BLCA	12q	del	tel	n	1	n	0.95	113231973	120420669	0.135629	0.212155	0.379452	0.000150737	3.82178	0.00995183	2.0021	0.7597	57
12	q24.13	SLC8B1	NM_001330466	113736570	113772973	0.206783	0.206396	BLCA	12q	del	tel	n	1	n	0.95	113231973	120420669	0.135629	0.212155	0.379452	0.000150737	3.82178	0.00995183	2.0021	0.7597	57
12	q24.13	PLBD2	NM_001159727	113796370	113827458	0.206147	0.205816	BLCA	12q	del	tel	n	1	n	0.95	113231973	120420669	0.135629	0.212155	0.379452	0.000150737	3.82178	0.00995183	2.0021	0.7597	57
12	q24.13	SDS	NM_006843	113830250	113841692	0.205786	0.205664	BLCA	12q	del	tel	n	1	n	0.95	113231973	120420669	0.135629	0.212155	0.379452	0.000150737	3.82178	0.00995183	2.0021	0.7597	57
12	q24.13	SDSL	NM_001304993	113860194	113876081	0.205467	0.205298	BLCA	12q	del	tel	n	1	n	0.95	113231973	120420669	0.135629	0.212155	0.379452	0.000150737	3.82178	0.00995183	2.0021	0.7597	57
12	q24.13	LHX5	NM_022363	113900693	113909877	0.205036	0.204939	BLCA	12q	del	tel	n	1	n	0.95	113231973	120420669	0.135629	0.212155	0.379452	0.000150737	3.82178	0.00995183	2.0021	0.7597	57
12	q24.13	LHX5-AS1	NR_126425	113909807	113918286	0.204939	0.204849	BLCA	12q	del	tel	n	1	n	0.95	113231973	120420669	0.135629	0.212155	0.379452	0.000150737	3.82178	0.00995183	2.0021	0.7597	57
12	q24.13	LINC01234	NR_110026	114182381	114211488	0.202038	0.201728	BLCA	12q	del	tel	n	1	n	0.95	113231973	120420669	0.135629	0.212155	0.379452	0.000150737	3.82178	0.00995183	2.0021	0.7597	57
12	q24.21	RBM19	NM_001146699	114254542	114404176	0.201269	0.199677	BLCA	12q	del	tel	n	1	n	0.95	113231973	120420669	0.135629	0.212155	0.379452	0.000150737	3.82178	0.00995183	2.0021	0.7597	57
12	q24.21	LINC02459	NR_146536	114676775	114679575	0.196775	0.196745	BLCA	12q	del	tel	n	1	n	0.95	113231973	120420669	0.135629	0.212155	0.379452	0.000150737	3.82178	0.00995183	2.0021	0.7597	57
12	q24.21	TBX5	NM_080717	114791734	114846247	0.195551	0.194971	BLCA	12q	del	tel	n	1	n	0.95	113231973	120420669	0.135629	0.212155	0.379452	0.000150737	3.82178	0.00995183	2.0021	0.7597	57
12	q24.21	TBX5-AS1	NR_038440	114845999	114850637	0.194973	0.194924	BLCA	12q	del	tel	n	1	n	0.95	113231973	120420669	0.135629	0.212155	0.379452	0.000150737	3.82178	0.00995183	2.0021	0.7597	57
12	q24.21	TBX3	NM_005996	115108058	115121969	0.192183	0.192035	BLCA	12q	del	tel	n	1	n	0.95	113231973	120420669	0.135629	0.212155	0.379452	0.000150737	3.82178	0.00995183	2.0021	0.7597	57
12	q24.21	MED13L	NM_015335	116396380	116714991	0.178469	0.175077	BLCA	12q	del	tel	n	1	n	0.95	113231973	120420669	0.135629	0.212155	0.379452	0.000150737	3.82178	0.00995183	2.0021	0.7597	57
12	q24.21	MIR620	NR_030351	116586364	116586459	0.176446	0.176445	BLCA	12q	del	tel	n	1	n	0.95	113231973	120420669	0.135629	0.212155	0.379452	0.000150737	3.82178	0.00995183	2.0021	0.7597	57
12	q24.22	MIR4472-2	NR_039683	116866056	116866123	0.173469	0.173468	BLCA	12q	del	tel	n	1	n	0.95	113231973	120420669	0.135629	0.212155	0.379452	0.000150737	3.82178	0.00995183	2.0021	0.7597	57
12	q24.22	LINC00173	NR_027346	116971239	116974318	0.172349	0.172316	BLCA	12q	del	tel	n	1	n	0.95	113231973	120420669	0.135629	0.212155	0.379452	0.000150737	3.82178	0.00995183	2.0021	0.7597	57
12	q24.22	MAP1LC3B2	NM_001085481	116997185	117014398	0.172073	0.17189	BLCA	12q	del	tel	n	1	n	0.95	113231973	120420669	0.135629	0.212155	0.379452	0.000150737	3.82178	0.00995183	2.0021	0.7597	57
12	q24.22	C12orf49	NM_024738	117151124	117175905	0.170434	0.170171	BLCA	12q	del	tel	n	1	n	0.95	113231973	120420669	0.135629	0.212155	0.379452	0.000150737	3.82178	0.00995183	2.0021	0.7597	57
12	q24.22	RNFT2	NM_032814	117176095	117291436	0.170168	0.168941	BLCA	12q	del	tel	n	1	n	0.95	113231973	120420669	0.135629	0.212155	0.379452	0.000150737	3.82178	0.00995183	2.0021	0.7597	57
12	q24.22	HRK	NM_003806	117293948	117319232	0.168914	0.168645	BLCA	12q	del	tel	n	1	n	0.95	113231973	120420669	0.135629	0.212155	0.379452	0.000150737	3.82178	0.00995183	2.0021	0.7597	57
12	q24.22	FBXW8	NM_012174	117348760	117468953	0.16833	0.167051	BLCA	12q	del	tel	n	1	n	0.95	113231973	120420669	0.135629	0.212155	0.379452	0.000150737	3.82178	0.00995183	2.0021	0.7597	57
12	q24.22	LOC100506551	NR_103809	117415244	117425142	0.167623	0.167517	BLCA	12q	del	tel	n	1	n	0.95	113231973	120420669	0.135629	0.212155	0.379452	0.000150737	3.82178	0.00995183	2.0021	0.7597	57
12	q24.22	TESC	NM_017899	117476727	117537251	0.166968	0.166324	BLCA	12q	del	tel	n	1	n	0.95	113231973	120420669	0.135629	0.212155	0.379452	0.000150737	3.82178	0.00995183	2.0021	0.7597	57
12	q24.22	TESC-AS1	NR_120464	117537271	117579294	0.166324	0.165876	BLCA	12q	del	tel	n	1	n	0.95	113231973	120420669	0.135629	0.212155	0.379452	0.000150737	3.82178	0.00995183	2.0021	0.7597	57
12	q24.22	FBXO21	NM_033624	117581584	117628300	0.165852	0.165355	BLCA	12q	del	tel	n	1	n	0.95	113231973	120420669	0.135629	0.212155	0.379452	0.000150737	3.82178	0.00995183	2.0021	0.7597	57
12	q24.22	NOS1	NM_001204218	117645946	117799607	0.165167	0.163531	BLCA	12q	del	tel	n	1	n	0.95	113231973	120420669	0.135629	0.212155	0.379452	0.000150737	3.82178	0.00995183	2.0021	0.7597	57
12	q24.23	KSR2	NM_173598	117890816	118406028	0.16256	0.157075	BLCA	12q	del	tel	n	1	n	0.95	113231973	120420669	0.135629	0.212155	0.379452	0.000150737	3.82178	0.00995183	2.0021	0.7597	57
12	q24.23	RFC5	NM_001346815	118454465	118470042	0.15656	0.156394	BLCA	12q	del	tel	n	1	n	0.95	113231973	120420669	0.135629	0.212155	0.379452	0.000150737	3.82178	0.00995183	2.0021	0.7597	57
12	q24.23	WSB2	NM_001278557	118470496	118499979	0.156389	0.156075	BLCA	12q	del	tel	n	1	n	0.95	113231973	120420669	0.135629	0.212155	0.379452	0.000150737	3.82178	0.00995183	2.0021	0.7597	57
12	q24.23	VSIG10	NM_019086	118501397	118541810	0.15606	0.15563	BLCA	12q	del	tel	n	1	n	0.95	113231973	120420669	0.135629	0.212155	0.379452	0.000150737	3.82178	0.00995183	2.0021	0.7597	57
12	q24.23	PEBP1	NM_002567	118573688	118583393	0.155291	0.155187	BLCA	12q	del	tel	n	1	n	0.95	113231973	120420669	0.135629	0.212155	0.379452	0.000150737	3.82178	0.00995183	2.0021	0.7597	57
12	q24.23	TAOK3	NM_001346492	118587605	118810750	0.155142	0.152767	BLCA	12q	del	tel	n	1	n	0.95	113231973	120420669	0.135629	0.212155	0.379452	0.000150737	3.82178	0.00995183	2.0021	0.7597	57
12	q24.23	SUDS3	NM_022491	118814357	118855840	0.152729	0.152287	BLCA	12q	del	tel	n	1	n	0.95	113231973	120420669	0.135629	0.212155	0.379452	0.000150737	3.82178	0.00995183	2.0021	0.7597	57
12	q24.23	LINC02423	NR_134998	119196558	119199484	0.14866	0.148629	BLCA	12q	del	tel	n	1	n	0.95	113231973	120420669	0.135629	0.212155	0.379452	0.000150737	3.82178	0.00995183	2.0021	0.7597	57
12	q24.23	LINC02439	NR_134997	119256611	119271341	0.148021	0.147864	BLCA	12q	del	tel	n	1	n	0.95	113231973	120420669	0.135629	0.212155	0.379452	0.000150737	3.82178	0.00995183	2.0021	0.7597	57
12	q24.23	SRRM4	NM_194286	119419299	119600856	0.146289	0.144356	BLCA	12q	del	tel	n	1	n	0.95	113231973	120420669	0.135629	0.212155	0.379452	0.000150737	3.82178	0.00995183	2.0021	0.7597	57
12	q24.23	LOC105370024	NR_134996	119611870	119614289	0.144239	0.144213	BLCA	12q	del	tel	n	1	n	0.95	113231973	120420669	0.135629	0.212155	0.379452	0.000150737	3.82178	0.00995183	2.0021	0.7597	57
12	q24.23	HSPB8	NM_014365	119616594	119632551	0.144189	0.144019	BLCA	12q	del	tel	n	1	n	0.95	113231973	120420669	0.135629	0.212155	0.379452	0.000150737	3.82178	0.00995183	2.0021	0.7597	57
12	q24.23	LINC00934	NR_024246	119721629	119741185	0.14307	0.142862	BLCA	12q	del	tel	n	1	n	0.95	113231973	120420669	0.135629	0.212155	0.379452	0.000150737	3.82178	0.00995183	2.0021	0.7597	57
12	q24.23	CCDC60	NM_178499	119772516	119978852	0.142529	0.140332	BLCA	12q	del	tel	n	1	n	0.95	113231973	120420669	0.135629	0.212155	0.379452	0.000150737	3.82178	0.00995183	2.0021	0.7597	57
12	q24.23	TMEM233	NM_001136534	120031263	120080871	0.139774	0.139246	BLCA	12q	del	tel	n	1	n	0.95	113231973	120420669	0.135629	0.212155	0.379452	0.000150737	3.82178	0.00995183	2.0021	0.7597	57
12	q24.23	PRKAB1	NM_006253	120105760	120119429	0.138981	0.138836	BLCA	12q	del	tel	n	1	n	0.95	113231973	120420669	0.135629	0.212155	0.379452	0.000150737	3.82178	0.00995183	2.0021	0.7597	57
12	q24.23	CIT	NM_001206999	120123594	120315095	0.138791	0.136753	BLCA	12q	del	tel	n	1	n	0.95	113231973	120420669	0.135629	0.212155	0.379452	0.000150737	3.82178	0.00995183	2.0021	0.7597	57
12	q24.23	MIR1178	NR_031589	120151438	120151529	0.138495	0.138494	BLCA	12q	del	tel	n	1	n	0.95	113231973	120420669	0.135629	0.212155	0.379452	0.000150737	3.82178	0.00995183	2.0021	0.7597	57
1	p34.3	KIAA0319L	NM_024874	35899090	36023037	0.278585	0.279642	BLCA	1p	del	tel	n	1	n	0.95	35950140	51533628	0.27902	0.411862	0.37649	0.000174716	3.75767	0.011285	1.9475	0.733214	246
1	p34.3	NCDN	NM_014284	36023392	36032380	0.279645	0.279721	BLCA	1p	del	tel	n	1	n	0.95	35950140	51533628	0.27902	0.411862	0.37649	0.000174716	3.75767	0.011285	1.9475	0.733214	246
1	p34.3	TFAP2E	NM_178548	36038970	36060927	0.279778	0.279965	BLCA	1p	del	tel	n	1	n	0.95	35950140	51533628	0.27902	0.411862	0.37649	0.000174716	3.75767	0.011285	1.9475	0.733214	246
1	p34.3	PSMB2	NM_002794	36065142	36107445	0.280001	0.280361	BLCA	1p	del	tel	n	1	n	0.95	35950140	51533628	0.27902	0.411862	0.37649	0.000174716	3.75767	0.011285	1.9475	0.733214	246
1	p34.3	C1orf216	NM_152374	36179476	36184790	0.280975	0.281021	BLCA	1p	del	tel	n	1	n	0.95	35950140	51533628	0.27902	0.411862	0.37649	0.000174716	3.75767	0.011285	1.9475	0.733214	246
1	p34.3	CLSPN	NM_001330490	36185818	36235551	0.281029	0.281453	BLCA	1p	del	tel	n	1	n	0.95	35950140	51533628	0.27902	0.411862	0.37649	0.000174716	3.75767	0.011285	1.9475	0.733214	246
1	p34.3	AGO4	NR_146062	36273224	36323490	0.281775	0.282203	BLCA	1p	del	tel	n	1	n	0.95	35950140	51533628	0.27902	0.411862	0.37649	0.000174716	3.75767	0.011285	1.9475	0.733214	246
1	p34.3	AGO1	NM_001317123	36335408	36389899	0.282305	0.282769	BLCA	1p	del	tel	n	1	n	0.95	35950140	51533628	0.27902	0.411862	0.37649	0.000174716	3.75767	0.011285	1.9475	0.733214	246
1	p34.3	AGO3	NM_024852	36396682	36522063	0.282827	0.283896	BLCA	1p	del	tel	n	1	n	0.95	35950140	51533628	0.27902	0.411862	0.37649	0.000174716	3.75767	0.011285	1.9475	0.733214	246
1	p34.3	TEKT2	NM_014466	36549675	36553876	0.284131	0.284167	BLCA	1p	del	tel	n	1	n	0.95	35950140	51533628	0.27902	0.411862	0.37649	0.000174716	3.75767	0.011285	1.9475	0.733214	246
1	p34.3	ADPRHL2	NM_017825	36554452	36559533	0.284172	0.284215	BLCA	1p	del	tel	n	1	n	0.95	35950140	51533628	0.27902	0.411862	0.37649	0.000174716	3.75767	0.011285	1.9475	0.733214	246
1	p34.3	COL8A2	NM_005202	36560836	36590685	0.284226	0.284481	BLCA	1p	del	tel	n	1	n	0.95	35950140	51533628	0.27902	0.411862	0.37649	0.000174716	3.75767	0.011285	1.9475	0.733214	246
1	p34.3	TRAPPC3	NM_001270895	36602169	36621654	0.284579	0.284745	BLCA	1p	del	tel	n	1	n	0.95	35950140	51533628	0.27902	0.411862	0.37649	0.000174716	3.75767	0.011285	1.9475	0.733214	246
1	p34.3	MAP7D1	NM_001286366	36621565	36646451	0.284744	0.284956	BLCA	1p	del	tel	n	1	n	0.95	35950140	51533628	0.27902	0.411862	0.37649	0.000174716	3.75767	0.011285	1.9475	0.733214	246
1	p34.3	THRAP3	NM_001321473	36690012	36770957	0.285327	0.286017	BLCA	1p	del	tel	n	1	n	0.95	35950140	51533628	0.27902	0.411862	0.37649	0.000174716	3.75767	0.011285	1.9475	0.733214	246
1	p34.3	SH3D21	NM_001162530	36771993	36786948	0.286026	0.286154	BLCA	1p	del	tel	n	1	n	0.95	35950140	51533628	0.27902	0.411862	0.37649	0.000174716	3.75767	0.011285	1.9475	0.733214	246
1	p34.3	EVA1B	NM_018166	36787630	36789755	0.28616	0.286178	BLCA	1p	del	tel	n	1	n	0.95	35950140	51533628	0.27902	0.411862	0.37649	0.000174716	3.75767	0.011285	1.9475	0.733214	246
1	p34.3	STK40	NM_032017	36805219	36851528	0.286309	0.286704	BLCA	1p	del	tel	n	1	n	0.95	35950140	51533628	0.27902	0.411862	0.37649	0.000174716	3.75767	0.011285	1.9475	0.733214	246
1	p34.3	LSM10	NM_032881	36859020	36863560	0.286768	0.286807	BLCA	1p	del	tel	n	1	n	0.95	35950140	51533628	0.27902	0.411862	0.37649	0.000174716	3.75767	0.011285	1.9475	0.733214	246
1	p34.3	OSCP1	NM_145047	36883506	36916086	0.286977	0.287255	BLCA	1p	del	tel	n	1	n	0.95	35950140	51533628	0.27902	0.411862	0.37649	0.000174716	3.75767	0.011285	1.9475	0.733214	246
1	p34.3	SNORA63C	NR_145725	36884048	36884179	0.286981	0.286983	BLCA	1p	del	tel	n	1	n	0.95	35950140	51533628	0.27902	0.411862	0.37649	0.000174716	3.75767	0.011285	1.9475	0.733214	246
1	p34.3	MRPS15	NM_031280	36921361	36930040	0.2873	0.287374	BLCA	1p	del	tel	n	1	n	0.95	35950140	51533628	0.27902	0.411862	0.37649	0.000174716	3.75767	0.011285	1.9475	0.733214	246
1	p34.3	CSF3R	NM_172313	36931643	36948915	0.287387	0.287534	BLCA	1p	del	tel	n	1	n	0.95	35950140	51533628	0.27902	0.411862	0.37649	0.000174716	3.75767	0.011285	1.9475	0.733214	246
1	p34.3	GRIK3	NM_000831	37261127	37499844	0.290196	0.292231	BLCA	1p	del	tel	n	1	n	0.95	35950140	51533628	0.27902	0.411862	0.37649	0.000174716	3.75767	0.011285	1.9475	0.733214	246
1	p34.3	MIR4255	NR_036217	37627163	37627235	0.293316	0.293317	BLCA	1p	del	tel	n	1	n	0.95	35950140	51533628	0.27902	0.411862	0.37649	0.000174716	3.75767	0.011285	1.9475	0.733214	246
1	p34.3	LINC01137	NR_038842	37920479	37940044	0.295817	0.295983	BLCA	1p	del	tel	n	1	n	0.95	35950140	51533628	0.27902	0.411862	0.37649	0.000174716	3.75767	0.011285	1.9475	0.733214	246
1	p34.3	ZC3H12A	NM_001323551	37940118	37949978	0.295984	0.296068	BLCA	1p	del	tel	n	1	n	0.95	35950140	51533628	0.27902	0.411862	0.37649	0.000174716	3.75767	0.011285	1.9475	0.733214	246
1	p34.3	MIR6732	NR_106790	37945830	37945890	0.296033	0.296033	BLCA	1p	del	tel	n	1	n	0.95	35950140	51533628	0.27902	0.411862	0.37649	0.000174716	3.75767	0.011285	1.9475	0.733214	246
1	p34.3	MEAF6	NR_073090	37955560	37980420	0.296116	0.296328	BLCA	1p	del	tel	n	1	n	0.95	35950140	51533628	0.27902	0.411862	0.37649	0.000174716	3.75767	0.011285	1.9475	0.733214	246
1	p34.3	MIR5581	NR_049844	37966535	37966595	0.296209	0.29621	BLCA	1p	del	tel	n	1	n	0.95	35950140	51533628	0.27902	0.411862	0.37649	0.000174716	3.75767	0.011285	1.9475	0.733214	246
1	p34.3	SNIP1	NM_024700	38000049	38019945	0.296495	0.296664	BLCA	1p	del	tel	n	1	n	0.95	35950140	51533628	0.27902	0.411862	0.37649	0.000174716	3.75767	0.011285	1.9475	0.733214	246
1	p34.3	DNALI1	NM_003462	38022519	38032458	0.296686	0.296771	BLCA	1p	del	tel	n	1	n	0.95	35950140	51533628	0.27902	0.411862	0.37649	0.000174716	3.75767	0.011285	1.9475	0.733214	246
1	p34.3	GNL2	NM_001323623	38032412	38061586	0.296771	0.297019	BLCA	1p	del	tel	n	1	n	0.95	35950140	51533628	0.27902	0.411862	0.37649	0.000174716	3.75767	0.011285	1.9475	0.733214	246
1	p34.3	RSPO1	NM_001242908	38076950	38100595	0.29715	0.297352	BLCA	1p	del	tel	n	1	n	0.95	35950140	51533628	0.27902	0.411862	0.37649	0.000174716	3.75767	0.011285	1.9475	0.733214	246
1	p34.3	C1orf109	NM_001350765	38147241	38157946	0.29775	0.297841	BLCA	1p	del	tel	n	1	n	0.95	35950140	51533628	0.27902	0.411862	0.37649	0.000174716	3.75767	0.011285	1.9475	0.733214	246
1	p34.3	CDCA8	NM_001256875	38158072	38175391	0.297842	0.29799	BLCA	1p	del	tel	n	1	n	0.95	35950140	51533628	0.27902	0.411862	0.37649	0.000174716	3.75767	0.011285	1.9475	0.733214	246
1	p34.3	EPHA10	NM_001099439	38181645	38230824	0.298043	0.298462	BLCA	1p	del	tel	n	1	n	0.95	35950140	51533628	0.27902	0.411862	0.37649	0.000174716	3.75767	0.011285	1.9475	0.733214	246
1	p34.3	MANEAL	NM_001113482	38259773	38267278	0.298709	0.298773	BLCA	1p	del	tel	n	1	n	0.95	35950140	51533628	0.27902	0.411862	0.37649	0.000174716	3.75767	0.011285	1.9475	0.733214	246
1	p34.3	YRDC	NM_024640	38268613	38273865	0.298784	0.298829	BLCA	1p	del	tel	n	1	n	0.95	35950140	51533628	0.27902	0.411862	0.37649	0.000174716	3.75767	0.011285	1.9475	0.733214	246
1	p34.3	C1orf122	NM_198446	38273472	38275126	0.298826	0.29884	BLCA	1p	del	tel	n	1	n	0.95	35950140	51533628	0.27902	0.411862	0.37649	0.000174716	3.75767	0.011285	1.9475	0.733214	246
1	p34.3	MTF1	NM_005955	38275238	38325292	0.298841	0.299267	BLCA	1p	del	tel	n	1	n	0.95	35950140	51533628	0.27902	0.411862	0.37649	0.000174716	3.75767	0.011285	1.9475	0.733214	246
1	p34.3	INPP5B	NM_005540	38326368	38412729	0.299277	0.300013	BLCA	1p	del	tel	n	1	n	0.95	35950140	51533628	0.27902	0.411862	0.37649	0.000174716	3.75767	0.011285	1.9475	0.733214	246
1	p34.3	SF3A3	NM_001320830	38422651	38455782	0.300097	0.30038	BLCA	1p	del	tel	n	1	n	0.95	35950140	51533628	0.27902	0.411862	0.37649	0.000174716	3.75767	0.011285	1.9475	0.733214	246
1	p34.3	FHL3	NM_001243878	38462441	38471187	0.300437	0.300511	BLCA	1p	del	tel	n	1	n	0.95	35950140	51533628	0.27902	0.411862	0.37649	0.000174716	3.75767	0.011285	1.9475	0.733214	246
1	p34.3	UTP11	NM_016037	38478383	38490497	0.300572	0.300676	BLCA	1p	del	tel	n	1	n	0.95	35950140	51533628	0.27902	0.411862	0.37649	0.000174716	3.75767	0.011285	1.9475	0.733214	246
1	p34.3	POU3F1	NM_002699	38509522	38512450	0.300838	0.300863	BLCA	1p	del	tel	n	1	n	0.95	35950140	51533628	0.27902	0.411862	0.37649	0.000174716	3.75767	0.011285	1.9475	0.733214	246
1	p34.3	MIR3659	NR_037432	38554902	38555001	0.301225	0.301226	BLCA	1p	del	tel	n	1	n	0.95	35950140	51533628	0.27902	0.411862	0.37649	0.000174716	3.75767	0.011285	1.9475	0.733214	246
1	p34.3	LINC01343	NR_038928	38674705	38680439	0.302246	0.302295	BLCA	1p	del	tel	n	1	n	0.95	35950140	51533628	0.27902	0.411862	0.37649	0.000174716	3.75767	0.011285	1.9475	0.733214	246
1	p34.3	LINC01685	NR_146761	38940867	38942156	0.304515	0.304526	BLCA	1p	del	tel	n	1	n	0.95	35950140	51533628	0.27902	0.411862	0.37649	0.000174716	3.75767	0.011285	1.9475	0.733214	246
1	p34.3	RRAGC	NM_001271851	39303868	39325495	0.307609	0.307794	BLCA	1p	del	tel	n	1	n	0.95	35950140	51533628	0.27902	0.411862	0.37649	0.000174716	3.75767	0.011285	1.9475	0.733214	246
1	p34.3	GJA9-MYCBP	NR_037633	39328161	39347298	0.307816	0.307979	BLCA	1p	del	tel	n	1	n	0.95	35950140	51533628	0.27902	0.411862	0.37649	0.000174716	3.75767	0.011285	1.9475	0.733214	246
1	p34.3	MYCBP	NR_037632	39328161	39339050	0.307816	0.307909	BLCA	1p	del	tel	n	1	n	0.95	35950140	51533628	0.27902	0.411862	0.37649	0.000174716	3.75767	0.011285	1.9475	0.733214	246
1	p34.3	LOC105378663	NR_135048	39339072	39341898	0.307909	0.307933	BLCA	1p	del	tel	n	1	n	0.95	35950140	51533628	0.27902	0.411862	0.37649	0.000174716	3.75767	0.011285	1.9475	0.733214	246
1	p34.3	GJA9	NM_030772	39339738	39347298	0.307915	0.307979	BLCA	1p	del	tel	n	1	n	0.95	35950140	51533628	0.27902	0.411862	0.37649	0.000174716	3.75767	0.011285	1.9475	0.733214	246
1	p34.3	RHBDL2	NM_017821	39351477	39407502	0.308015	0.308493	BLCA	1p	del	tel	n	1	n	0.95	35950140	51533628	0.27902	0.411862	0.37649	0.000174716	3.75767	0.011285	1.9475	0.733214	246
1	p34.3	AKIRIN1	NM_024595	39456915	39471737	0.308914	0.30904	BLCA	1p	del	tel	n	1	n	0.95	35950140	51533628	0.27902	0.411862	0.37649	0.000174716	3.75767	0.011285	1.9475	0.733214	246
1	p34.3	NDUFS5	NM_004552	39491966	39500308	0.309213	0.309284	BLCA	1p	del	tel	n	1	n	0.95	35950140	51533628	0.27902	0.411862	0.37649	0.000174716	3.75767	0.011285	1.9475	0.733214	246
1	p34.3	MACF1	NM_012090	39549838	39952810	0.309706	0.313141	BLCA	1p	del	tel	n	1	n	0.95	35950140	51533628	0.27902	0.411862	0.37649	0.000174716	3.75767	0.011285	1.9475	0.733214	246
1	p34.3	KIAA0754	NM_015038	39875175	39882154	0.312479	0.312539	BLCA	1p	del	tel	n	1	n	0.95	35950140	51533628	0.27902	0.411862	0.37649	0.000174716	3.75767	0.011285	1.9475	0.733214	246
1	p34.3	BMP8A	NM_181809	39957317	39995541	0.31318	0.313505	BLCA	1p	del	tel	n	1	n	0.95	35950140	51533628	0.27902	0.411862	0.37649	0.000174716	3.75767	0.011285	1.9475	0.733214	246
1	p34.3	OXCT2P1	NR_132962	39980537	39982341	0.313378	0.313393	BLCA	1p	del	tel	n	1	n	0.95	35950140	51533628	0.27902	0.411862	0.37649	0.000174716	3.75767	0.011285	1.9475	0.733214	246
1	p34.3	PPIEL	NR_003929	39987951	40025370	0.313441	0.31376	BLCA	1p	del	tel	n	1	n	0.95	35950140	51533628	0.27902	0.411862	0.37649	0.000174716	3.75767	0.011285	1.9475	0.733214	246
1	p34.3	PABPC4	NM_003819	40026484	40042521	0.313769	0.313906	BLCA	1p	del	tel	n	1	n	0.95	35950140	51533628	0.27902	0.411862	0.37649	0.000174716	3.75767	0.011285	1.9475	0.733214	246
1	p34.3	LOC101929516	NR_125979	40030741	40038875	0.313806	0.313875	BLCA	1p	del	tel	n	1	n	0.95	35950140	51533628	0.27902	0.411862	0.37649	0.000174716	3.75767	0.011285	1.9475	0.733214	246
1	p34.3	SNORA55	NR_002983	40033045	40033182	0.313825	0.313826	BLCA	1p	del	tel	n	1	n	0.95	35950140	51533628	0.27902	0.411862	0.37649	0.000174716	3.75767	0.011285	1.9475	0.733214	246
1	p34.3	HEYL	NM_014571	40089102	40105348	0.314303	0.314441	BLCA	1p	del	tel	n	1	n	0.95	35950140	51533628	0.27902	0.411862	0.37649	0.000174716	3.75767	0.011285	1.9475	0.733214	246
1	p34.2	NT5C1A	NM_032526	40124792	40137710	0.314607	0.314717	BLCA	1p	del	tel	n	1	n	0.95	35950140	51533628	0.27902	0.411862	0.37649	0.000174716	3.75767	0.011285	1.9475	0.733214	246
1	p34.2	HPCAL4	NM_016257	40144319	40157382	0.314774	0.314885	BLCA	1p	del	tel	n	1	n	0.95	35950140	51533628	0.27902	0.411862	0.37649	0.000174716	3.75767	0.011285	1.9475	0.733214	246
1	p34.2	PPIE	NM_001195007	40204516	40229586	0.315287	0.315501	BLCA	1p	del	tel	n	1	n	0.95	35950140	51533628	0.27902	0.411862	0.37649	0.000174716	3.75767	0.011285	1.9475	0.733214	246
1	p34.2	BMP8B	NM_001720	40222853	40254533	0.315443	0.315713	BLCA	1p	del	tel	n	1	n	0.95	35950140	51533628	0.27902	0.411862	0.37649	0.000174716	3.75767	0.011285	1.9475	0.733214	246
1	p34.2	OXCT2	NM_022120	40235196	40237020	0.315548	0.315564	BLCA	1p	del	tel	n	1	n	0.95	35950140	51533628	0.27902	0.411862	0.37649	0.000174716	3.75767	0.011285	1.9475	0.733214	246
1	p34.2	LOC101929536	NR_135805	40254647	40255842	0.315714	0.315724	BLCA	1p	del	tel	n	1	n	0.95	35950140	51533628	0.27902	0.411862	0.37649	0.000174716	3.75767	0.011285	1.9475	0.733214	246
1	p34.2	TRIT1	NR_132401	40306705	40349183	0.316158	0.31652	BLCA	1p	del	tel	n	1	n	0.95	35950140	51533628	0.27902	0.411862	0.37649	0.000174716	3.75767	0.011285	1.9475	0.733214	246
1	p34.2	MYCL	NM_001033082	40361095	40367687	0.316622	0.316678	BLCA	1p	del	tel	n	1	n	0.95	35950140	51533628	0.27902	0.411862	0.37649	0.000174716	3.75767	0.011285	1.9475	0.733214	246
1	p34.2	MFSD2A	NM_001287808	40420783	40435640	0.31713	0.317257	BLCA	1p	del	tel	n	1	n	0.95	35950140	51533628	0.27902	0.411862	0.37649	0.000174716	3.75767	0.011285	1.9475	0.733214	246
1	p34.2	CAP1	NM_001350479	40505736	40538321	0.317855	0.318132	BLCA	1p	del	tel	n	1	n	0.95	35950140	51533628	0.27902	0.411862	0.37649	0.000174716	3.75767	0.011285	1.9475	0.733214	246
1	p34.2	PPT1	NM_001142604	40538381	40563142	0.318133	0.318344	BLCA	1p	del	tel	n	1	n	0.95	35950140	51533628	0.27902	0.411862	0.37649	0.000174716	3.75767	0.011285	1.9475	0.733214	246
1	p34.2	RLF	NM_012421	40627040	40706593	0.318889	0.319567	BLCA	1p	del	tel	n	1	n	0.95	35950140	51533628	0.27902	0.411862	0.37649	0.000174716	3.75767	0.011285	1.9475	0.733214	246
1	p34.2	TMCO2	NM_001008740	40713572	40717365	0.319626	0.319659	BLCA	1p	del	tel	n	1	n	0.95	35950140	51533628	0.27902	0.411862	0.37649	0.000174716	3.75767	0.011285	1.9475	0.733214	246
1	p34.2	ZMPSTE24	NM_005857	40723721	40759856	0.319713	0.320021	BLCA	1p	del	tel	n	1	n	0.95	35950140	51533628	0.27902	0.411862	0.37649	0.000174716	3.75767	0.011285	1.9475	0.733214	246
1	p34.2	COL9A2	NM_001852	40766162	40782939	0.320075	0.320218	BLCA	1p	del	tel	n	1	n	0.95	35950140	51533628	0.27902	0.411862	0.37649	0.000174716	3.75767	0.011285	1.9475	0.733214	246
1	p34.2	SMAP2	NM_022733	40839377	40888998	0.320699	0.321122	BLCA	1p	del	tel	n	1	n	0.95	35950140	51533628	0.27902	0.411862	0.37649	0.000174716	3.75767	0.011285	1.9475	0.733214	246
1	p34.2	ZFP69B	NM_023070	40916336	40929390	0.321355	0.321466	BLCA	1p	del	tel	n	1	n	0.95	35950140	51533628	0.27902	0.411862	0.37649	0.000174716	3.75767	0.011285	1.9475	0.733214	246
1	p34.2	ZFP69	NM_001320179	40943301	40962015	0.321585	0.321744	BLCA	1p	del	tel	n	1	n	0.95	35950140	51533628	0.27902	0.411862	0.37649	0.000174716	3.75767	0.011285	1.9475	0.733214	246
1	p34.2	EXO5	NM_022774	40974390	40981722	0.32185	0.321912	BLCA	1p	del	tel	n	1	n	0.95	35950140	51533628	0.27902	0.411862	0.37649	0.000174716	3.75767	0.011285	1.9475	0.733214	246
1	p34.2	ZNF684	NM_152373	40997232	41013841	0.322044	0.322186	BLCA	1p	del	tel	n	1	n	0.95	35950140	51533628	0.27902	0.411862	0.37649	0.000174716	3.75767	0.011285	1.9475	0.733214	246
1	p34.2	RIMS3	NM_014747	41086351	41131324	0.322804	0.323187	BLCA	1p	del	tel	n	1	n	0.95	35950140	51533628	0.27902	0.411862	0.37649	0.000174716	3.75767	0.011285	1.9475	0.733214	246
1	p34.2	NFYC-AS1	NR_024567	41154751	41157933	0.323387	0.323414	BLCA	1p	del	tel	n	1	n	0.95	35950140	51533628	0.27902	0.411862	0.37649	0.000174716	3.75767	0.011285	1.9475	0.733214	246
1	p34.2	NFYC	NM_014223	41157241	41237275	0.323408	0.324091	BLCA	1p	del	tel	n	1	n	0.95	35950140	51533628	0.27902	0.411862	0.37649	0.000174716	3.75767	0.011285	1.9475	0.733214	246
1	p34.2	MIR30E	NR_029846	41220026	41220118	0.323944	0.323944	BLCA	1p	del	tel	n	1	n	0.95	35950140	51533628	0.27902	0.411862	0.37649	0.000174716	3.75767	0.011285	1.9475	0.733214	246
1	p34.2	MIR30C1	NR_029833	41222955	41223044	0.323969	0.323969	BLCA	1p	del	tel	n	1	n	0.95	35950140	51533628	0.27902	0.411862	0.37649	0.000174716	3.75767	0.011285	1.9475	0.733214	246
1	p34.2	KCNQ4	NM_172163	41249683	41306124	0.324196	0.324678	BLCA	1p	del	tel	n	1	n	0.95	35950140	51533628	0.27902	0.411862	0.37649	0.000174716	3.75767	0.011285	1.9475	0.733214	246
1	p34.2	CITED4	NM_133467	41326727	41328018	0.324853	0.324864	BLCA	1p	del	tel	n	1	n	0.95	35950140	51533628	0.27902	0.411862	0.37649	0.000174716	3.75767	0.011285	1.9475	0.733214	246
1	p34.2	CTPS1	NR_125440	41444970	41478237	0.325861	0.326145	BLCA	1p	del	tel	n	1	n	0.95	35950140	51533628	0.27902	0.411862	0.37649	0.000174716	3.75767	0.011285	1.9475	0.733214	246
1	p34.2	SLFNL1-AS1	NR_037868	41480261	41509562	0.326162	0.326412	BLCA	1p	del	tel	n	1	n	0.95	35950140	51533628	0.27902	0.411862	0.37649	0.000174716	3.75767	0.011285	1.9475	0.733214	246
1	p34.2	SLFNL1	NM_144990	41481268	41487427	0.326171	0.326223	BLCA	1p	del	tel	n	1	n	0.95	35950140	51533628	0.27902	0.411862	0.37649	0.000174716	3.75767	0.011285	1.9475	0.733214	246
1	p34.2	SCMH1	NM_012236	41492870	41707815	0.326269	0.328102	BLCA	1p	del	tel	n	1	n	0.95	35950140	51533628	0.27902	0.411862	0.37649	0.000174716	3.75767	0.011285	1.9475	0.733214	246
1	p34.2	FOXO6	NM_001291281	41827602	41849263	0.329123	0.329308	BLCA	1p	del	tel	n	1	n	0.95	35950140	51533628	0.27902	0.411862	0.37649	0.000174716	3.75767	0.011285	1.9475	0.733214	246
1	p34.2	LOC101929901	NR_135817	41840675	41841341	0.329234	0.32924	BLCA	1p	del	tel	n	1	n	0.95	35950140	51533628	0.27902	0.411862	0.37649	0.000174716	3.75767	0.011285	1.9475	0.733214	246
1	p34.2	EDN2	NR_126098	41944445	41950354	0.330119	0.330169	BLCA	1p	del	tel	n	1	n	0.95	35950140	51533628	0.27902	0.411862	0.37649	0.000174716	3.75767	0.011285	1.9475	0.733214	246
1	p34.2	HIVEP3	NM_024503	41972035	42384378	0.330354	0.333869	BLCA	1p	del	tel	n	1	n	0.95	35950140	51533628	0.27902	0.411862	0.37649	0.000174716	3.75767	0.011285	1.9475	0.733214	246
1	p34.2	GUCA2B	NM_007102	42619091	42621495	0.33587	0.33589	BLCA	1p	del	tel	n	1	n	0.95	35950140	51533628	0.27902	0.411862	0.37649	0.000174716	3.75767	0.011285	1.9475	0.733214	246
1	p34.2	GUCA2A	NM_033553	42628361	42630395	0.335949	0.335966	BLCA	1p	del	tel	n	1	n	0.95	35950140	51533628	0.27902	0.411862	0.37649	0.000174716	3.75767	0.011285	1.9475	0.733214	246
1	p34.2	FOXJ3	NM_001198850	42642209	42801548	0.336067	0.337425	BLCA	1p	del	tel	n	1	n	0.95	35950140	51533628	0.27902	0.411862	0.37649	0.000174716	3.75767	0.011285	1.9475	0.733214	246
1	p34.2	RIMKLA	NM_173642	42846467	42889900	0.337808	0.338178	BLCA	1p	del	tel	n	1	n	0.95	35950140	51533628	0.27902	0.411862	0.37649	0.000174716	3.75767	0.011285	1.9475	0.733214	246
1	p34.2	ZMYND12	NM_001146192	42896000	42921938	0.33823	0.338452	BLCA	1p	del	tel	n	1	n	0.95	35950140	51533628	0.27902	0.411862	0.37649	0.000174716	3.75767	0.011285	1.9475	0.733214	246
1	p34.2	CCDC30	NM_001355226	42921740	43119861	0.33845	0.340139	BLCA	1p	del	tel	n	1	n	0.95	35950140	51533628	0.27902	0.411862	0.37649	0.000174716	3.75767	0.011285	1.9475	0.733214	246
1	p34.2	PPCS	NM_001287511	42922164	42939049	0.338453	0.338597	BLCA	1p	del	tel	n	1	n	0.95	35950140	51533628	0.27902	0.411862	0.37649	0.000174716	3.75767	0.011285	1.9475	0.733214	246
1	p34.2	PPIH	NM_006347	43124047	43142429	0.340174	0.340331	BLCA	1p	del	tel	n	1	n	0.95	35950140	51533628	0.27902	0.411862	0.37649	0.000174716	3.75767	0.011285	1.9475	0.733214	246
1	p34.2	YBX1	NM_004559	43147905	43169474	0.340378	0.340562	BLCA	1p	del	tel	n	1	n	0.95	35950140	51533628	0.27902	0.411862	0.37649	0.000174716	3.75767	0.011285	1.9475	0.733214	246
1	p34.2	CLDN19	NM_001185117	43198763	43205925	0.340811	0.340872	BLCA	1p	del	tel	n	1	n	0.95	35950140	51533628	0.27902	0.411862	0.37649	0.000174716	3.75767	0.011285	1.9475	0.733214	246
1	p34.2	P3H1	NM_022356	43212005	43232755	0.340924	0.341101	BLCA	1p	del	tel	n	1	n	0.95	35950140	51533628	0.27902	0.411862	0.37649	0.000174716	3.75767	0.011285	1.9475	0.733214	246
1	p34.2	C1orf50	NM_024097	43232915	43241413	0.341102	0.341175	BLCA	1p	del	tel	n	1	n	0.95	35950140	51533628	0.27902	0.411862	0.37649	0.000174716	3.75767	0.011285	1.9475	0.733214	246
1	p34.2	LOC105378683	NR_133055	43242336	43250566	0.341183	0.341253	BLCA	1p	del	tel	n	1	n	0.95	35950140	51533628	0.27902	0.411862	0.37649	0.000174716	3.75767	0.011285	1.9475	0.733214	246
1	p34.2	TMEM269	NM_001354602	43250702	43266489	0.341254	0.341389	BLCA	1p	del	tel	n	1	n	0.95	35950140	51533628	0.27902	0.411862	0.37649	0.000174716	3.75767	0.011285	1.9475	0.733214	246
1	p34.2	SVBP	NM_199342	43272722	43283059	0.341442	0.34153	BLCA	1p	del	tel	n	1	n	0.95	35950140	51533628	0.27902	0.411862	0.37649	0.000174716	3.75767	0.011285	1.9475	0.733214	246
1	p34.2	ERMAP	NM_001017922	43282775	43310660	0.341528	0.341765	BLCA	1p	del	tel	n	1	n	0.95	35950140	51533628	0.27902	0.411862	0.37649	0.000174716	3.75767	0.011285	1.9475	0.733214	246
1	p34.2	ZNF691	NM_015911	43312243	43318146	0.341779	0.341829	BLCA	1p	del	tel	n	1	n	0.95	35950140	51533628	0.27902	0.411862	0.37649	0.000174716	3.75767	0.011285	1.9475	0.733214	246
1	p34.2	LOC339539	NR_104171	43323292	43354463	0.341873	0.342139	BLCA	1p	del	tel	n	1	n	0.95	35950140	51533628	0.27902	0.411862	0.37649	0.000174716	3.75767	0.011285	1.9475	0.733214	246
1	p34.2	SLC2A1	NM_006516	43391045	43424847	0.34245	0.342739	BLCA	1p	del	tel	n	1	n	0.95	35950140	51533628	0.27902	0.411862	0.37649	0.000174716	3.75767	0.011285	1.9475	0.733214	246
1	p34.2	SLC2A1-AS1	NR_033967	43424719	43449029	0.342738	0.342945	BLCA	1p	del	tel	n	1	n	0.95	35950140	51533628	0.27902	0.411862	0.37649	0.000174716	3.75767	0.011285	1.9475	0.733214	246
1	p34.2	FAM183A	NM_001101376	43613593	43622067	0.344348	0.34442	BLCA	1p	del	tel	n	1	n	0.95	35950140	51533628	0.27902	0.411862	0.37649	0.000174716	3.75767	0.011285	1.9475	0.733214	246
1	p34.2	EBNA1BP2	NM_001159936	43629844	43638241	0.344486	0.344558	BLCA	1p	del	tel	n	1	n	0.95	35950140	51533628	0.27902	0.411862	0.37649	0.000174716	3.75767	0.011285	1.9475	0.733214	246
1	p34.2	MIR6733	NR_106791	43637322	43637383	0.34455	0.34455	BLCA	1p	del	tel	n	1	n	0.95	35950140	51533628	0.27902	0.411862	0.37649	0.000174716	3.75767	0.011285	1.9475	0.733214	246
1	p34.2	CFAP57	NM_001195831	43638000	43720029	0.344556	0.345255	BLCA	1p	del	tel	n	1	n	0.95	35950140	51533628	0.27902	0.411862	0.37649	0.000174716	3.75767	0.011285	1.9475	0.733214	246
1	p34.2	TMEM125	NM_144626	43735664	43739673	0.345388	0.345422	BLCA	1p	del	tel	n	1	n	0.95	35950140	51533628	0.27902	0.411862	0.37649	0.000174716	3.75767	0.011285	1.9475	0.733214	246
1	p34.2	C1orf210	NM_001164829	43747555	43751288	0.34549	0.345521	BLCA	1p	del	tel	n	1	n	0.95	35950140	51533628	0.27902	0.411862	0.37649	0.000174716	3.75767	0.011285	1.9475	0.733214	246
1	p34.2	TIE1	NM_001253357	43766565	43788781	0.345652	0.345841	BLCA	1p	del	tel	n	1	n	0.95	35950140	51533628	0.27902	0.411862	0.37649	0.000174716	3.75767	0.011285	1.9475	0.733214	246
1	p34.2	MPL	NM_005373	43803474	43820135	0.345966	0.346108	BLCA	1p	del	tel	n	1	n	0.95	35950140	51533628	0.27902	0.411862	0.37649	0.000174716	3.75767	0.011285	1.9475	0.733214	246
1	p34.2	CDC20	NM_001255	43824625	43828873	0.346147	0.346183	BLCA	1p	del	tel	n	1	n	0.95	35950140	51533628	0.27902	0.411862	0.37649	0.000174716	3.75767	0.011285	1.9475	0.733214	246
1	p34.2	ELOVL1	NM_022821	43829067	43833745	0.346184	0.346224	BLCA	1p	del	tel	n	1	n	0.95	35950140	51533628	0.27902	0.411862	0.37649	0.000174716	3.75767	0.011285	1.9475	0.733214	246
1	p34.2	MIR6734	NR_106792	43830318	43830386	0.346195	0.346196	BLCA	1p	del	tel	n	1	n	0.95	35950140	51533628	0.27902	0.411862	0.37649	0.000174716	3.75767	0.011285	1.9475	0.733214	246
1	p34.2	MED8	NM_052877	43849578	43855483	0.346359	0.34641	BLCA	1p	del	tel	n	1	n	0.95	35950140	51533628	0.27902	0.411862	0.37649	0.000174716	3.75767	0.011285	1.9475	0.733214	246
1	p34.2	SZT2	NM_015284	43855555	43919918	0.34641	0.346959	BLCA	1p	del	tel	n	1	n	0.95	35950140	51533628	0.27902	0.411862	0.37649	0.000174716	3.75767	0.011285	1.9475	0.733214	246
1	p34.2	SZT2-AS1	NR_046744	43913448	43914315	0.346904	0.346911	BLCA	1p	del	tel	n	1	n	0.95	35950140	51533628	0.27902	0.411862	0.37649	0.000174716	3.75767	0.011285	1.9475	0.733214	246
1	p34.2	MIR6735	NR_106793	43914209	43914282	0.34691	0.346911	BLCA	1p	del	tel	n	1	n	0.95	35950140	51533628	0.27902	0.411862	0.37649	0.000174716	3.75767	0.011285	1.9475	0.733214	246
1	p34.2	HYI	NM_031207	43916673	43919660	0.346931	0.346957	BLCA	1p	del	tel	n	1	n	0.95	35950140	51533628	0.27902	0.411862	0.37649	0.000174716	3.75767	0.011285	1.9475	0.733214	246
1	p34.2	PTPRF	NM_001329138	43991707	44089343	0.347571	0.348403	BLCA	1p	del	tel	n	1	n	0.95	35950140	51533628	0.27902	0.411862	0.37649	0.000174716	3.75767	0.011285	1.9475	0.733214	246
1	p34.1	KDM4A	NM_014663	44115796	44171189	0.348629	0.349101	BLCA	1p	del	tel	n	1	n	0.95	35950140	51533628	0.27902	0.411862	0.37649	0.000174716	3.75767	0.011285	1.9475	0.733214	246
1	p34.1	KDM4A-AS1	NR_033827	44165408	44173012	0.349052	0.349116	BLCA	1p	del	tel	n	1	n	0.95	35950140	51533628	0.27902	0.411862	0.37649	0.000174716	3.75767	0.011285	1.9475	0.733214	246
1	p34.1	ST3GAL3	NM_174967	44173167	44396837	0.349118	0.351024	BLCA	1p	del	tel	n	1	n	0.95	35950140	51533628	0.27902	0.411862	0.37649	0.000174716	3.75767	0.011285	1.9475	0.733214	246
1	p34.1	LOC101929592	NR_125986	44175075	44193014	0.349134	0.349287	BLCA	1p	del	tel	n	1	n	0.95	35950140	51533628	0.27902	0.411862	0.37649	0.000174716	3.75767	0.011285	1.9475	0.733214	246
1	p34.1	MIR6079	NR_106727	44304293	44304355	0.350235	0.350236	BLCA	1p	del	tel	n	1	n	0.95	35950140	51533628	0.27902	0.411862	0.37649	0.000174716	3.75767	0.011285	1.9475	0.733214	246
1	p34.1	ARTN	NM_001136215	44398991	44402912	0.351043	0.351076	BLCA	1p	del	tel	n	1	n	0.95	35950140	51533628	0.27902	0.411862	0.37649	0.000174716	3.75767	0.011285	1.9475	0.733214	246
1	p34.1	IPO13	NM_014652	44412477	44433694	0.351158	0.351339	BLCA	1p	del	tel	n	1	n	0.95	35950140	51533628	0.27902	0.411862	0.37649	0.000174716	3.75767	0.011285	1.9475	0.733214	246
1	p34.1	DPH2	NM_001319171	44435652	44439043	0.351355	0.351384	BLCA	1p	del	tel	n	1	n	0.95	35950140	51533628	0.27902	0.411862	0.37649	0.000174716	3.75767	0.011285	1.9475	0.733214	246
1	p34.1	ATP6V0B	NM_004047	44440319	44443972	0.351395	0.351426	BLCA	1p	del	tel	n	1	n	0.95	35950140	51533628	0.27902	0.411862	0.37649	0.000174716	3.75767	0.011285	1.9475	0.733214	246
1	p34.1	B4GALT2	NM_003780	44444873	44456843	0.351434	0.351536	BLCA	1p	del	tel	n	1	n	0.95	35950140	51533628	0.27902	0.411862	0.37649	0.000174716	3.75767	0.011285	1.9475	0.733214	246
1	p34.1	CCDC24	NM_001349127	44457267	44462198	0.351539	0.351582	BLCA	1p	del	tel	n	1	n	0.95	35950140	51533628	0.27902	0.411862	0.37649	0.000174716	3.75767	0.011285	1.9475	0.733214	246
1	p34.1	SLC6A9	NM_001328626	44462154	44497164	0.351581	0.35188	BLCA	1p	del	tel	n	1	n	0.95	35950140	51533628	0.27902	0.411862	0.37649	0.000174716	3.75767	0.011285	1.9475	0.733214	246
1	p34.1	KLF17	NM_173484	44584521	44600809	0.352624	0.352763	BLCA	1p	del	tel	n	1	n	0.95	35950140	51533628	0.27902	0.411862	0.37649	0.000174716	3.75767	0.011285	1.9475	0.733214	246
1	p34.1	KLF18	NM_001358438	44603492	44607303	0.352786	0.352818	BLCA	1p	del	tel	n	1	n	0.95	35950140	51533628	0.27902	0.411862	0.37649	0.000174716	3.75767	0.011285	1.9475	0.733214	246
1	p34.1	DMAP1	NM_001034024	44679124	44686351	0.353431	0.353492	BLCA	1p	del	tel	n	1	n	0.95	35950140	51533628	0.27902	0.411862	0.37649	0.000174716	3.75767	0.011285	1.9475	0.733214	246
1	p34.1	ERI3	NM_001301700	44686741	44820951	0.353496	0.35464	BLCA	1p	del	tel	n	1	n	0.95	35950140	51533628	0.27902	0.411862	0.37649	0.000174716	3.75767	0.011285	1.9475	0.733214	246
1	p34.1	ERI3-IT1	NR_110056	44688266	44709955	0.353509	0.353694	BLCA	1p	del	tel	n	1	n	0.95	35950140	51533628	0.27902	0.411862	0.37649	0.000174716	3.75767	0.011285	1.9475	0.733214	246
1	p34.1	SNORA110	NR_132966	44718015	44718231	0.353762	0.353764	BLCA	1p	del	tel	n	1	n	0.95	35950140	51533628	0.27902	0.411862	0.37649	0.000174716	3.75767	0.011285	1.9475	0.733214	246
1	p34.1	RNF220	NM_001319956	44870831	45117396	0.355065	0.357167	BLCA	1p	del	tel	n	1	n	0.95	35950140	51533628	0.27902	0.411862	0.37649	0.000174716	3.75767	0.011285	1.9475	0.733214	246
1	p34.1	MIR5584	NR_049849	45011164	45011224	0.356261	0.356262	BLCA	1p	del	tel	n	1	n	0.95	35950140	51533628	0.27902	0.411862	0.37649	0.000174716	3.75767	0.011285	1.9475	0.733214	246
1	p34.1	TMEM53	NM_001300747	45118918	45140280	0.35718	0.357362	BLCA	1p	del	tel	n	1	n	0.95	35950140	51533628	0.27902	0.411862	0.37649	0.000174716	3.75767	0.011285	1.9475	0.733214	246
1	p34.1	SNORD145	NR_145816	45136628	45136728	0.357331	0.357332	BLCA	1p	del	tel	n	1	n	0.95	35950140	51533628	0.27902	0.411862	0.37649	0.000174716	3.75767	0.011285	1.9475	0.733214	246
1	p34.1	C1orf228	NM_001145636	45140393	45191263	0.357363	0.357796	BLCA	1p	del	tel	n	1	n	0.95	35950140	51533628	0.27902	0.411862	0.37649	0.000174716	3.75767	0.011285	1.9475	0.733214	246
1	p34.1	KIF2C	NM_001297655	45205489	45233438	0.357918	0.358156	BLCA	1p	del	tel	n	1	n	0.95	35950140	51533628	0.27902	0.411862	0.37649	0.000174716	3.75767	0.011285	1.9475	0.733214	246
1	p34.1	SNORD160	NR_145793	45227706	45227779	0.358107	0.358108	BLCA	1p	del	tel	n	1	n	0.95	35950140	51533628	0.27902	0.411862	0.37649	0.000174716	3.75767	0.011285	1.9475	0.733214	246
1	p34.1	RPS8	NM_001012	45241245	45244412	0.358223	0.35825	BLCA	1p	del	tel	n	1	n	0.95	35950140	51533628	0.27902	0.411862	0.37649	0.000174716	3.75767	0.011285	1.9475	0.733214	246
1	p34.1	SNORD55	NR_000015	45241536	45241610	0.358225	0.358226	BLCA	1p	del	tel	n	1	n	0.95	35950140	51533628	0.27902	0.411862	0.37649	0.000174716	3.75767	0.011285	1.9475	0.733214	246
1	p34.1	SNORD46	NR_000024	45242163	45242261	0.35823	0.358231	BLCA	1p	del	tel	n	1	n	0.95	35950140	51533628	0.27902	0.411862	0.37649	0.000174716	3.75767	0.011285	1.9475	0.733214	246
1	p34.1	SNORD38A	NR_001456	45243513	45243584	0.358242	0.358242	BLCA	1p	del	tel	n	1	n	0.95	35950140	51533628	0.27902	0.411862	0.37649	0.000174716	3.75767	0.011285	1.9475	0.733214	246
1	p34.1	SNORD38B	NR_001457	45244061	45244130	0.358247	0.358247	BLCA	1p	del	tel	n	1	n	0.95	35950140	51533628	0.27902	0.411862	0.37649	0.000174716	3.75767	0.011285	1.9475	0.733214	246
1	p34.1	BEST4	NM_153274	45249256	45253426	0.358291	0.358326	BLCA	1p	del	tel	n	1	n	0.95	35950140	51533628	0.27902	0.411862	0.37649	0.000174716	3.75767	0.011285	1.9475	0.733214	246
1	p34.1	PLK3	NM_004073	45265896	45271667	0.358433	0.358482	BLCA	1p	del	tel	n	1	n	0.95	35950140	51533628	0.27902	0.411862	0.37649	0.000174716	3.75767	0.011285	1.9475	0.733214	246
1	p34.1	TCTEX1D4	NM_001013632	45271581	45272957	0.358481	0.358493	BLCA	1p	del	tel	n	1	n	0.95	35950140	51533628	0.27902	0.411862	0.37649	0.000174716	3.75767	0.011285	1.9475	0.733214	246
1	p34.1	BTBD19	NM_001136537	45274153	45279801	0.358503	0.358551	BLCA	1p	del	tel	n	1	n	0.95	35950140	51533628	0.27902	0.411862	0.37649	0.000174716	3.75767	0.011285	1.9475	0.733214	246
1	p34.1	PTCH2	NM_001166292	45285515	45308616	0.3586	0.358797	BLCA	1p	del	tel	n	1	n	0.95	35950140	51533628	0.27902	0.411862	0.37649	0.000174716	3.75767	0.011285	1.9475	0.733214	246
1	p34.1	EIF2B3	NM_001261418	45316193	45452394	0.358861	0.360022	BLCA	1p	del	tel	n	1	n	0.95	35950140	51533628	0.27902	0.411862	0.37649	0.000174716	3.75767	0.011285	1.9475	0.733214	246
1	p34.1	HECTD3	NM_024602	45468219	45477027	0.360157	0.360232	BLCA	1p	del	tel	n	1	n	0.95	35950140	51533628	0.27902	0.411862	0.37649	0.000174716	3.75767	0.011285	1.9475	0.733214	246
1	p34.1	UROD	NR_036510	45477804	45481341	0.360239	0.360269	BLCA	1p	del	tel	n	1	n	0.95	35950140	51533628	0.27902	0.411862	0.37649	0.000174716	3.75767	0.011285	1.9475	0.733214	246
1	p34.1	ZSWIM5	NM_020883	45482075	45672250	0.360275	0.361897	BLCA	1p	del	tel	n	1	n	0.95	35950140	51533628	0.27902	0.411862	0.37649	0.000174716	3.75767	0.011285	1.9475	0.733214	246
1	p34.1	LINC01144	NR_024270	45769581	45771291	0.362726	0.362741	BLCA	1p	del	tel	n	1	n	0.95	35950140	51533628	0.27902	0.411862	0.37649	0.000174716	3.75767	0.011285	1.9475	0.733214	246
1	p34.1	HPDL	NM_032756	45792544	45794346	0.362922	0.362937	BLCA	1p	del	tel	n	1	n	0.95	35950140	51533628	0.27902	0.411862	0.37649	0.000174716	3.75767	0.011285	1.9475	0.733214	246
1	p34.1	MUTYH	NM_001293190	45794913	45806142	0.362942	0.363038	BLCA	1p	del	tel	n	1	n	0.95	35950140	51533628	0.27902	0.411862	0.37649	0.000174716	3.75767	0.011285	1.9475	0.733214	246
1	p34.1	TOE1	NM_025077	45805341	45809650	0.363031	0.363068	BLCA	1p	del	tel	n	1	n	0.95	35950140	51533628	0.27902	0.411862	0.37649	0.000174716	3.75767	0.011285	1.9475	0.733214	246
1	p34.1	TESK2	NM_001320800	45809554	45956840	0.363067	0.364323	BLCA	1p	del	tel	n	1	n	0.95	35950140	51533628	0.27902	0.411862	0.37649	0.000174716	3.75767	0.011285	1.9475	0.733214	246
1	p34.1	CCDC163	NR_033297	45959534	45965751	0.364346	0.364399	BLCA	1p	del	tel	n	1	n	0.95	35950140	51533628	0.27902	0.411862	0.37649	0.000174716	3.75767	0.011285	1.9475	0.733214	246
1	p34.1	MMACHC	NM_001330540	45965855	45976739	0.364399	0.364492	BLCA	1p	del	tel	n	1	n	0.95	35950140	51533628	0.27902	0.411862	0.37649	0.000174716	3.75767	0.011285	1.9475	0.733214	246
1	p34.1	PRDX1	NM_001202431	45976706	45988562	0.364492	0.364593	BLCA	1p	del	tel	n	1	n	0.95	35950140	51533628	0.27902	0.411862	0.37649	0.000174716	3.75767	0.011285	1.9475	0.733214	246
1	p34.1	AKR1A1	NM_153326	46016454	46035723	0.364831	0.364995	BLCA	1p	del	tel	n	1	n	0.95	35950140	51533628	0.27902	0.411862	0.37649	0.000174716	3.75767	0.011285	1.9475	0.733214	246
1	p34.1	NASP	NM_001195193	46049659	46084578	0.365114	0.365412	BLCA	1p	del	tel	n	1	n	0.95	35950140	51533628	0.27902	0.411862	0.37649	0.000174716	3.75767	0.011285	1.9475	0.733214	246
1	p34.1	CCDC17	NM_001114938	46085715	46089731	0.365421	0.365455	BLCA	1p	del	tel	n	1	n	0.95	35950140	51533628	0.27902	0.411862	0.37649	0.000174716	3.75767	0.011285	1.9475	0.733214	246
1	p34.1	GPBP1L1	NM_021639	46092975	46152302	0.365483	0.365989	BLCA	1p	del	tel	n	1	n	0.95	35950140	51533628	0.27902	0.411862	0.37649	0.000174716	3.75767	0.011285	1.9475	0.733214	246
1	p34.1	RPS15AP10	NR_026768	46111451	46112357	0.365641	0.365648	BLCA	1p	del	tel	n	1	n	0.95	35950140	51533628	0.27902	0.411862	0.37649	0.000174716	3.75767	0.011285	1.9475	0.733214	246
1	p34.1	TMEM69	NM_016486	46153846	46160108	0.366002	0.366055	BLCA	1p	del	tel	n	1	n	0.95	35950140	51533628	0.27902	0.411862	0.37649	0.000174716	3.75767	0.011285	1.9475	0.733214	246
1	p34.1	IPP	NM_001145349	46159997	46216485	0.366054	0.366536	BLCA	1p	del	tel	n	1	n	0.95	35950140	51533628	0.27902	0.411862	0.37649	0.000174716	3.75767	0.011285	1.9475	0.733214	246
1	p34.1	MAST2	NM_001324320	46269278	46501796	0.366986	0.368968	BLCA	1p	del	tel	n	1	n	0.95	35950140	51533628	0.27902	0.411862	0.37649	0.000174716	3.75767	0.011285	1.9475	0.733214	246
1	p34.1	LOC110117498-PIK3R3	NM_001303427	46505811	46642167	0.369002	0.370165	BLCA	1p	del	tel	n	1	n	0.95	35950140	51533628	0.27902	0.411862	0.37649	0.000174716	3.75767	0.011285	1.9475	0.733214	246
1	p34.1	PIK3R3	NM_001328648	46505811	46640573	0.369002	0.370151	BLCA	1p	del	tel	n	1	n	0.95	35950140	51533628	0.27902	0.411862	0.37649	0.000174716	3.75767	0.011285	1.9475	0.733214	246
1	p34.1	LOC101929626	NR_125987	46599042	46604752	0.369797	0.369846	BLCA	1p	del	tel	n	1	n	0.95	35950140	51533628	0.27902	0.411862	0.37649	0.000174716	3.75767	0.011285	1.9475	0.733214	246
1	p34.1	TSPAN1	NM_005727	46640748	46651634	0.370153	0.370245	BLCA	1p	del	tel	n	1	n	0.95	35950140	51533628	0.27902	0.411862	0.37649	0.000174716	3.75767	0.011285	1.9475	0.733214	246
1	p34.1	LOC110117498	NM_001328655	46641158	46642167	0.370156	0.370165	BLCA	1p	del	tel	n	1	n	0.95	35950140	51533628	0.27902	0.411862	0.37649	0.000174716	3.75767	0.011285	1.9475	0.733214	246
1	p34.1	POMGNT1	NM_001243766	46654352	46685977	0.370269	0.370538	BLCA	1p	del	tel	n	1	n	0.95	35950140	51533628	0.27902	0.411862	0.37649	0.000174716	3.75767	0.011285	1.9475	0.733214	246
1	p34.1	LURAP1	NM_001013615	46669005	46686928	0.370393	0.370546	BLCA	1p	del	tel	n	1	n	0.95	35950140	51533628	0.27902	0.411862	0.37649	0.000174716	3.75767	0.011285	1.9475	0.733214	246
1	p34.1	RAD54L	NM_001142548	46713366	46744145	0.370772	0.371034	BLCA	1p	del	tel	n	1	n	0.95	35950140	51533628	0.27902	0.411862	0.37649	0.000174716	3.75767	0.011285	1.9475	0.733214	246
1	p34.1	LRRC41	NM_006369	46744071	46769038	0.371033	0.371246	BLCA	1p	del	tel	n	1	n	0.95	35950140	51533628	0.27902	0.411862	0.37649	0.000174716	3.75767	0.011285	1.9475	0.733214	246
1	p34.1	UQCRH	NM_006004	46769284	46782449	0.371248	0.371361	BLCA	1p	del	tel	n	1	n	0.95	35950140	51533628	0.27902	0.411862	0.37649	0.000174716	3.75767	0.011285	1.9475	0.733214	246
1	p33	NSUN4	NR_045789	46805848	46830824	0.37156	0.371773	BLCA	1p	del	tel	n	1	n	0.95	35950140	51533628	0.27902	0.411862	0.37649	0.000174716	3.75767	0.011285	1.9475	0.733214	246
1	p33	FAAH	NM_001441	46859938	46879520	0.372021	0.372188	BLCA	1p	del	tel	n	1	n	0.95	35950140	51533628	0.27902	0.411862	0.37649	0.000174716	3.75767	0.011285	1.9475	0.733214	246
1	p33	FAAHP1	NR_045483	46899498	46911374	0.372358	0.37246	BLCA	1p	del	tel	n	1	n	0.95	35950140	51533628	0.27902	0.411862	0.37649	0.000174716	3.75767	0.011285	1.9475	0.733214	246
1	p33	LINC01398	NR_121680	46912344	46915376	0.372468	0.372494	BLCA	1p	del	tel	n	1	n	0.95	35950140	51533628	0.27902	0.411862	0.37649	0.000174716	3.75767	0.011285	1.9475	0.733214	246
1	p33	DMBX1	NM_147192	46972667	46979886	0.372982	0.373044	BLCA	1p	del	tel	n	1	n	0.95	35950140	51533628	0.27902	0.411862	0.37649	0.000174716	3.75767	0.011285	1.9475	0.733214	246
1	p33	LOC105378696	NM_001357063	46998665	47001187	0.373204	0.373225	BLCA	1p	del	tel	n	1	n	0.95	35950140	51533628	0.27902	0.411862	0.37649	0.000174716	3.75767	0.011285	1.9475	0.733214	246
1	p33	MKNK1-AS1	NR_038403	47004367	47035927	0.373252	0.373521	BLCA	1p	del	tel	n	1	n	0.95	35950140	51533628	0.27902	0.411862	0.37649	0.000174716	3.75767	0.011285	1.9475	0.733214	246
1	p33	KNCN	NM_001322255	47011309	47017329	0.373311	0.373363	BLCA	1p	del	tel	n	1	n	0.95	35950140	51533628	0.27902	0.411862	0.37649	0.000174716	3.75767	0.011285	1.9475	0.733214	246
1	p33	MKNK1	NR_146512	47023078	47069973	0.373412	0.373812	BLCA	1p	del	tel	n	1	n	0.95	35950140	51533628	0.27902	0.411862	0.37649	0.000174716	3.75767	0.011285	1.9475	0.733214	246
1	p33	MOB3C	NM_201403	47073386	47082563	0.373841	0.373919	BLCA	1p	del	tel	n	1	n	0.95	35950140	51533628	0.27902	0.411862	0.37649	0.000174716	3.75767	0.011285	1.9475	0.733214	246
1	p33	ATPAF1	NM_022745	47100710	47134099	0.374074	0.374358	BLCA	1p	del	tel	n	1	n	0.95	35950140	51533628	0.27902	0.411862	0.37649	0.000174716	3.75767	0.011285	1.9475	0.733214	246
1	p33	TEX38	NM_001145474	47137504	47139256	0.374387	0.374402	BLCA	1p	del	tel	n	1	n	0.95	35950140	51533628	0.27902	0.411862	0.37649	0.000174716	3.75767	0.011285	1.9475	0.733214	246
1	p33	EFCAB14-AS1	NR_038827	47139707	47157769	0.374406	0.37456	BLCA	1p	del	tel	n	1	n	0.95	35950140	51533628	0.27902	0.411862	0.37649	0.000174716	3.75767	0.011285	1.9475	0.733214	246
1	p33	EFCAB14	NM_014774	47140830	47184736	0.374416	0.37479	BLCA	1p	del	tel	n	1	n	0.95	35950140	51533628	0.27902	0.411862	0.37649	0.000174716	3.75767	0.011285	1.9475	0.733214	246
1	p33	CYP4B1	NR_135003	47264669	47285021	0.375471	0.375645	BLCA	1p	del	tel	n	1	n	0.95	35950140	51533628	0.27902	0.411862	0.37649	0.000174716	3.75767	0.011285	1.9475	0.733214	246
1	p33	CYP4Z2P	NR_002788	47308766	47366147	0.375847	0.376336	BLCA	1p	del	tel	n	1	n	0.95	35950140	51533628	0.27902	0.411862	0.37649	0.000174716	3.75767	0.011285	1.9475	0.733214	246
1	p33	CYP4A11	NM_001319155	47394845	47407156	0.376581	0.376686	BLCA	1p	del	tel	n	1	n	0.95	35950140	51533628	0.27902	0.411862	0.37649	0.000174716	3.75767	0.011285	1.9475	0.733214	246
1	p33	CYP4X1	NM_001320289	47427035	47516426	0.376855	0.377617	BLCA	1p	del	tel	n	1	n	0.95	35950140	51533628	0.27902	0.411862	0.37649	0.000174716	3.75767	0.011285	1.9475	0.733214	246
1	p33	CYP4Z1	NM_178134	47533159	47583992	0.37776	0.378193	BLCA	1p	del	tel	n	1	n	0.95	35950140	51533628	0.27902	0.411862	0.37649	0.000174716	3.75767	0.011285	1.9475	0.733214	246
1	p33	CYP4A22	NM_001010969	47603096	47614526	0.378356	0.378454	BLCA	1p	del	tel	n	1	n	0.95	35950140	51533628	0.27902	0.411862	0.37649	0.000174716	3.75767	0.011285	1.9475	0.733214	246
1	p33	LINC00853	NR_047498	47644921	47646011	0.378713	0.378722	BLCA	1p	del	tel	n	1	n	0.95	35950140	51533628	0.27902	0.411862	0.37649	0.000174716	3.75767	0.011285	1.9475	0.733214	246
1	p33	PDZK1IP1	NM_005764	47649260	47655771	0.37875	0.378805	BLCA	1p	del	tel	n	1	n	0.95	35950140	51533628	0.27902	0.411862	0.37649	0.000174716	3.75767	0.011285	1.9475	0.733214	246
1	p33	TAL1	NM_001290406	47681961	47698007	0.379028	0.379165	BLCA	1p	del	tel	n	1	n	0.95	35950140	51533628	0.27902	0.411862	0.37649	0.000174716	3.75767	0.011285	1.9475	0.733214	246
1	p33	STIL	NM_001282939	47715810	47779819	0.379317	0.379863	BLCA	1p	del	tel	n	1	n	0.95	35950140	51533628	0.27902	0.411862	0.37649	0.000174716	3.75767	0.011285	1.9475	0.733214	246
1	p33	CMPK1	NM_001136140	47799468	47844511	0.38003	0.380414	BLCA	1p	del	tel	n	1	n	0.95	35950140	51533628	0.27902	0.411862	0.37649	0.000174716	3.75767	0.011285	1.9475	0.733214	246
1	p33	LINC01389	NR_126355	47846467	47902989	0.380431	0.380913	BLCA	1p	del	tel	n	1	n	0.95	35950140	51533628	0.27902	0.411862	0.37649	0.000174716	3.75767	0.011285	1.9475	0.733214	246
1	p33	FOXE3	NM_012186	47881743	47883724	0.380731	0.380748	BLCA	1p	del	tel	n	1	n	0.95	35950140	51533628	0.27902	0.411862	0.37649	0.000174716	3.75767	0.011285	1.9475	0.733214	246
1	p33	FOXD2-AS1	NR_026878	47897806	47900313	0.380868	0.38089	BLCA	1p	del	tel	n	1	n	0.95	35950140	51533628	0.27902	0.411862	0.37649	0.000174716	3.75767	0.011285	1.9475	0.733214	246
1	p33	FOXD2	NM_004474	47901688	47906363	0.380901	0.380941	BLCA	1p	del	tel	n	1	n	0.95	35950140	51533628	0.27902	0.411862	0.37649	0.000174716	3.75767	0.011285	1.9475	0.733214	246
1	p33	TRABD2B	NM_001194986	48226199	48462562	0.383668	0.385683	BLCA	1p	del	tel	n	1	n	0.95	35950140	51533628	0.27902	0.411862	0.37649	0.000174716	3.75767	0.011285	1.9475	0.733214	246
1	p33	SKINT1L	NR_026749	48567386	48648100	0.386576	0.387264	BLCA	1p	del	tel	n	1	n	0.95	35950140	51533628	0.27902	0.411862	0.37649	0.000174716	3.75767	0.011285	1.9475	0.733214	246
1	p33	SLC5A9	NM_001135181	48688356	48714316	0.387607	0.387829	BLCA	1p	del	tel	n	1	n	0.95	35950140	51533628	0.27902	0.411862	0.37649	0.000174716	3.75767	0.011285	1.9475	0.733214	246
1	p33	SPATA6	NM_001286239	48761043	48937880	0.388227	0.389735	BLCA	1p	del	tel	n	1	n	0.95	35950140	51533628	0.27902	0.411862	0.37649	0.000174716	3.75767	0.011285	1.9475	0.733214	246
1	p33	AGBL4	NR_136623	48998526	50489626	0.390252	0.402962	BLCA	1p	del	tel	n	1	n	0.95	35950140	51533628	0.27902	0.411862	0.37649	0.000174716	3.75767	0.011285	1.9475	0.733214	246
1	p33	BEND5	NR_146232	49193194	49242641	0.391911	0.392332	BLCA	1p	del	tel	n	1	n	0.95	35950140	51533628	0.27902	0.411862	0.37649	0.000174716	3.75767	0.011285	1.9475	0.733214	246
1	p33	LOC101929721	NR_125988	49723082	49734966	0.396428	0.396529	BLCA	1p	del	tel	n	1	n	0.95	35950140	51533628	0.27902	0.411862	0.37649	0.000174716	3.75767	0.011285	1.9475	0.733214	246
1	p33	AGBL4-IT1	NR_046839	49839872	49937757	0.397424	0.398258	BLCA	1p	del	tel	n	1	n	0.95	35950140	51533628	0.27902	0.411862	0.37649	0.000174716	3.75767	0.011285	1.9475	0.733214	246
1	p33	ELAVL4	NM_001144777	50513685	50669457	0.403167	0.404495	BLCA	1p	del	tel	n	1	n	0.95	35950140	51533628	0.27902	0.411862	0.37649	0.000174716	3.75767	0.011285	1.9475	0.733214	246
1	p32.3	DMRTA2	NM_032110	50883222	50889119	0.406318	0.406368	BLCA	1p	del	tel	n	1	n	0.95	35950140	51533628	0.27902	0.411862	0.37649	0.000174716	3.75767	0.011285	1.9475	0.733214	246
1	p32.3	FAF1	NM_007051	50906934	51425936	0.40652	0.410944	BLCA	1p	del	tel	n	1	n	0.95	35950140	51533628	0.27902	0.411862	0.37649	0.000174716	3.75767	0.011285	1.9475	0.733214	246
1	p32.3	CDKN2C	NM_001262	51434366	51440306	0.411016	0.411066	BLCA	1p	del	tel	n	1	n	0.95	35950140	51533628	0.27902	0.411862	0.37649	0.000174716	3.75767	0.011285	1.9475	0.733214	246
1	p32.3	MIR4421	NR_039617	51525508	51525577	0.411793	0.411793	BLCA	1p	del	tel	n	1	n	0.95	35950140	51533628	0.27902	0.411862	0.37649	0.000174716	3.75767	0.011285	1.9475	0.733214	246
1	p32.3	MIR6500	NR_106754	51525689	51525775	0.411794	0.411795	BLCA	1p	del	tel	n	1	n	0.95	35950140	51533628	0.27902	0.411862	0.37649	0.000174716	3.75767	0.011285	1.9475	0.733214	246
16	p13.2	ABAT	NM_020686	8768443	8878432	0.260122	0.263648	BLCA	16p	del	tel	n	1	n	0.95	8764428	10215441	0.259993	0.306505	0.284436	3.40939e-05	4.46732	0.00272005	2.56542	0.729698	11
16	p13.2	TMEM186	NM_015421	8889036	8891505	0.263988	0.264067	BLCA	16p	del	tel	n	1	n	0.95	8764428	10215441	0.259993	0.306505	0.284436	3.40939e-05	4.46732	0.00272005	2.56542	0.729698	11
16	p13.2	PMM2	NM_000303	8891669	8943194	0.264072	0.265724	BLCA	16p	del	tel	n	1	n	0.95	8764428	10215441	0.259993	0.306505	0.284436	3.40939e-05	4.46732	0.00272005	2.56542	0.729698	11
16	p13.2	LOC100130283	NR_147908	8943325	8954274	0.265728	0.266079	BLCA	16p	del	tel	n	1	n	0.95	8764428	10215441	0.259993	0.306505	0.284436	3.40939e-05	4.46732	0.00272005	2.56542	0.729698	11
16	p13.2	CARHSP1	NM_014316	8946798	8962869	0.265839	0.266354	BLCA	16p	del	tel	n	1	n	0.95	8764428	10215441	0.259993	0.306505	0.284436	3.40939e-05	4.46732	0.00272005	2.56542	0.729698	11
16	p13.2	USP7	NM_003470	8985950	9057341	0.267094	0.269382	BLCA	16p	del	tel	n	1	n	0.95	8764428	10215441	0.259993	0.306505	0.284436	3.40939e-05	4.46732	0.00272005	2.56542	0.729698	11
16	p13.2	C16orf72	NM_014117	9185536	9213555	0.273492	0.27439	BLCA	16p	del	tel	n	1	n	0.95	8764428	10215441	0.259993	0.306505	0.284436	3.40939e-05	4.46732	0.00272005	2.56542	0.729698	11
16	p13.2	LINC02177	NR_135195	9449444	9501950	0.281951	0.283634	BLCA	16p	del	tel	n	1	n	0.95	8764428	10215441	0.259993	0.306505	0.284436	3.40939e-05	4.46732	0.00272005	2.56542	0.729698	11
16	p13.2	LINC01177	NR_126397	9535150	9538842	0.284698	0.284817	BLCA	16p	del	tel	n	1	n	0.95	8764428	10215441	0.259993	0.306505	0.284436	3.40939e-05	4.46732	0.00272005	2.56542	0.729698	11
16	p13.2	LINC01195	NR_126349	9539869	9549362	0.28485	0.285154	BLCA	16p	del	tel	n	1	n	0.95	8764428	10215441	0.259993	0.306505	0.284436	3.40939e-05	4.46732	0.00272005	2.56542	0.729698	11
16	p13.2	GRIN2A	NM_000833	9847261	10276611	0.294703	0.308466	BLCA	16p	del	tel	n	1	n	0.95	8764428	10215441	0.259993	0.306505	0.284436	3.40939e-05	4.46732	0.00272005	2.56542	0.729698	11
9	p22.2	CNTLN	NM_017738	17134988	17503921	0.430612	0.440331	BLCA	9p	del	tel	p	1	p	0.95	17412099	31389171	0.437912	0.806139	0.369725	0.000420593	3.37614	0.0242061	1.61607	0.597504	70
9	p22.2	SH3GL2	NM_003026	17578951	17797126	0.442308	0.448056	BLCA	9p	del	tel	p	1	p	0.95	17412099	31389171	0.437912	0.806139	0.369725	0.000420593	3.37614	0.0242061	1.61607	0.597504	70
9	p22.1	ADAMTSL1	NM_001040272	18474078	18910947	0.46589	0.4774	BLCA	9p	del	tel	p	1	p	0.95	17412099	31389171	0.437912	0.806139	0.369725	0.000420593	3.37614	0.0242061	1.61607	0.597504	70
9	p22.1	MIR3152	NR_036107	18573303	18573377	0.468504	0.468506	BLCA	9p	del	tel	p	1	p	0.95	17412099	31389171	0.437912	0.806139	0.369725	0.000420593	3.37614	0.0242061	1.61607	0.597504	70
9	p22.1	SAXO1	NM_001287049	18927657	19049352	0.47784	0.481046	BLCA	9p	del	tel	p	1	p	0.95	17412099	31389171	0.437912	0.806139	0.369725	0.000420593	3.37614	0.0242061	1.61607	0.597504	70
9	p22.1	RRAGA	NM_006570	19049371	19051021	0.481046	0.48109	BLCA	9p	del	tel	p	1	p	0.95	17412099	31389171	0.437912	0.806139	0.369725	0.000420593	3.37614	0.0242061	1.61607	0.597504	70
9	p22.1	HAUS6	NM_001270890	19053134	19102940	0.481145	0.482458	BLCA	9p	del	tel	p	1	p	0.95	17412099	31389171	0.437912	0.806139	0.369725	0.000420593	3.37614	0.0242061	1.61607	0.597504	70
9	p22.1	SCARNA8	NR_003009	19063653	19063784	0.481423	0.481426	BLCA	9p	del	tel	p	1	p	0.95	17412099	31389171	0.437912	0.806139	0.369725	0.000420593	3.37614	0.0242061	1.61607	0.597504	70
9	p22.1	PLIN2	NM_001122	19115758	19127604	0.482795	0.483107	BLCA	9p	del	tel	p	1	p	0.95	17412099	31389171	0.437912	0.806139	0.369725	0.000420593	3.37614	0.0242061	1.61607	0.597504	70
9	p22.1	DENND4C	NM_001330640	19230487	19374266	0.485818	0.489606	BLCA	9p	del	tel	p	1	p	0.95	17412099	31389171	0.437912	0.806139	0.369725	0.000420593	3.37614	0.0242061	1.61607	0.597504	70
9	p22.1	RPS6	NM_001010	19376253	19380235	0.489658	0.489763	BLCA	9p	del	tel	p	1	p	0.95	17412099	31389171	0.437912	0.806139	0.369725	0.000420593	3.37614	0.0242061	1.61607	0.597504	70
9	p22.1	ACER2	NM_001010887	19408924	19452500	0.490519	0.491667	BLCA	9p	del	tel	p	1	p	0.95	17412099	31389171	0.437912	0.806139	0.369725	0.000420593	3.37614	0.0242061	1.61607	0.597504	70
9	p22.1	SLC24A2	NM_001193288	19507449	19787017	0.493114	0.50048	BLCA	9p	del	tel	p	1	p	0.95	17412099	31389171	0.437912	0.806139	0.369725	0.000420593	3.37614	0.0242061	1.61607	0.597504	70
9	p21.3	MLLT3	NM_004529	20341662	20622542	0.515092	0.522492	BLCA	9p	del	tel	p	1	p	0.95	17412099	31389171	0.437912	0.806139	0.369725	0.000420593	3.37614	0.0242061	1.61607	0.597504	70
9	p21.3	MIR4473	NR_039684	20411145	20411236	0.516922	0.516925	BLCA	9p	del	tel	p	1	p	0.95	17412099	31389171	0.437912	0.806139	0.369725	0.000420593	3.37614	0.0242061	1.61607	0.597504	70
9	p21.3	MIR4474	NR_039685	20502262	20502340	0.519323	0.519325	BLCA	9p	del	tel	p	1	p	0.95	17412099	31389171	0.437912	0.806139	0.369725	0.000420593	3.37614	0.0242061	1.61607	0.597504	70
9	p21.3	FOCAD	NM_017794	20658307	20995954	0.523434	0.532329	BLCA	9p	del	tel	p	1	p	0.95	17412099	31389171	0.437912	0.806139	0.369725	0.000420593	3.37614	0.0242061	1.61607	0.597504	70
9	p21.3	FOCAD-AS1	NR_121601	20683300	20684749	0.524092	0.52413	BLCA	9p	del	tel	p	1	p	0.95	17412099	31389171	0.437912	0.806139	0.369725	0.000420593	3.37614	0.0242061	1.61607	0.597504	70
9	p21.3	MIR491	NR_030166	20716103	20716187	0.524957	0.524959	BLCA	9p	del	tel	p	1	p	0.95	17412099	31389171	0.437912	0.806139	0.369725	0.000420593	3.37614	0.0242061	1.61607	0.597504	70
9	p21.3	SNORA30B	NR_145762	20786925	20787054	0.526822	0.526826	BLCA	9p	del	tel	p	1	p	0.95	17412099	31389171	0.437912	0.806139	0.369725	0.000420593	3.37614	0.0242061	1.61607	0.597504	70
9	p21.3	HACD4	NM_001321903	21003622	21031674	0.532531	0.53327	BLCA	9p	del	tel	p	1	p	0.95	17412099	31389171	0.437912	0.806139	0.369725	0.000420593	3.37614	0.0242061	1.61607	0.597504	70
9	p21.3	IFNB1	NM_002176	21077103	21077962	0.534467	0.53449	BLCA	9p	del	tel	p	1	p	0.95	17412099	31389171	0.437912	0.806139	0.369725	0.000420593	3.37614	0.0242061	1.61607	0.597504	70
9	p21.3	IFNW1	NM_002177	21140630	21141900	0.536141	0.536174	BLCA	9p	del	tel	p	1	p	0.95	17412099	31389171	0.437912	0.806139	0.369725	0.000420593	3.37614	0.0242061	1.61607	0.597504	70
9	p21.3	IFNA21	NM_002175	21165635	21166659	0.536799	0.536826	BLCA	9p	del	tel	p	1	p	0.95	17412099	31389171	0.437912	0.806139	0.369725	0.000420593	3.37614	0.0242061	1.61607	0.597504	70
9	p21.3	IFNA4	NM_021068	21186617	21187598	0.537352	0.537378	BLCA	9p	del	tel	p	1	p	0.95	17412099	31389171	0.437912	0.806139	0.369725	0.000420593	3.37614	0.0242061	1.61607	0.597504	70
9	p21.3	IFNA7	NM_021057	21201467	21202204	0.537743	0.537763	BLCA	9p	del	tel	p	1	p	0.95	17412099	31389171	0.437912	0.806139	0.369725	0.000420593	3.37614	0.0242061	1.61607	0.597504	70
9	p21.3	IFNA10	NM_002171	21206179	21207142	0.537868	0.537893	BLCA	9p	del	tel	p	1	p	0.95	17412099	31389171	0.437912	0.806139	0.369725	0.000420593	3.37614	0.0242061	1.61607	0.597504	70
9	p21.3	IFNA16	NM_002173	21216371	21217310	0.538136	0.538161	BLCA	9p	del	tel	p	1	p	0.95	17412099	31389171	0.437912	0.806139	0.369725	0.000420593	3.37614	0.0242061	1.61607	0.597504	70
9	p21.3	IFNA17	NM_021268	21227241	21228221	0.538422	0.538448	BLCA	9p	del	tel	p	1	p	0.95	17412099	31389171	0.437912	0.806139	0.369725	0.000420593	3.37614	0.0242061	1.61607	0.597504	70
9	p21.3	IFNA14	NM_002172	21239200	21239978	0.538738	0.538758	BLCA	9p	del	tel	p	1	p	0.95	17412099	31389171	0.437912	0.806139	0.369725	0.000420593	3.37614	0.0242061	1.61607	0.597504	70
9	p21.3	IFNA22P	NR_036676	21277686	21278562	0.539751	0.539775	BLCA	9p	del	tel	p	1	p	0.95	17412099	31389171	0.437912	0.806139	0.369725	0.000420593	3.37614	0.0242061	1.61607	0.597504	70
9	p21.3	IFNA5	NM_002169	21304612	21305312	0.540461	0.540479	BLCA	9p	del	tel	p	1	p	0.95	17412099	31389171	0.437912	0.806139	0.369725	0.000420593	3.37614	0.0242061	1.61607	0.597504	70
9	p21.3	KLHL9	NM_018847	21329669	21335431	0.541121	0.541273	BLCA	9p	del	tel	p	1	p	0.95	17412099	31389171	0.437912	0.806139	0.369725	0.000420593	3.37614	0.0242061	1.61607	0.597504	70
9	p21.3	IFNA6	NM_021002	21350316	21350886	0.541665	0.54168	BLCA	9p	del	tel	p	1	p	0.95	17412099	31389171	0.437912	0.806139	0.369725	0.000420593	3.37614	0.0242061	1.61607	0.597504	70
9	p21.3	IFNA13	NM_006900	21367370	21368075	0.542114	0.542133	BLCA	9p	del	tel	p	1	p	0.95	17412099	31389171	0.437912	0.806139	0.369725	0.000420593	3.37614	0.0242061	1.61607	0.597504	70
9	p21.3	IFNA2	NM_000605	21384253	21385396	0.542559	0.542589	BLCA	9p	del	tel	p	1	p	0.95	17412099	31389171	0.437912	0.806139	0.369725	0.000420593	3.37614	0.0242061	1.61607	0.597504	70
9	p21.3	IFNA8	NM_002170	21409145	21410184	0.543215	0.543242	BLCA	9p	del	tel	p	1	p	0.95	17412099	31389171	0.437912	0.806139	0.369725	0.000420593	3.37614	0.0242061	1.61607	0.597504	70
9	p21.3	IFNA1	NM_024013	21440452	21441315	0.54404	0.544062	BLCA	9p	del	tel	p	1	p	0.95	17412099	31389171	0.437912	0.806139	0.369725	0.000420593	3.37614	0.0242061	1.61607	0.597504	70
9	p21.3	MIR31HG	NR_027054	21454266	21559797	0.544403	0.547184	BLCA	9p	del	tel	p	1	p	0.95	17412099	31389171	0.437912	0.806139	0.369725	0.000420593	3.37614	0.0242061	1.61607	0.597504	70
9	p21.3	IFNE	NM_176891	21480838	21482312	0.545104	0.545142	BLCA	9p	del	tel	p	1	p	0.95	17412099	31389171	0.437912	0.806139	0.369725	0.000420593	3.37614	0.0242061	1.61607	0.597504	70
9	p21.3	MIR31	NR_029505	21512113	21512184	0.545927	0.545929	BLCA	9p	del	tel	p	1	p	0.95	17412099	31389171	0.437912	0.806139	0.369725	0.000420593	3.37614	0.0242061	1.61607	0.597504	70
9	p21.3	MTAP	NM_002451	21802634	21865969	0.553581	0.55525	BLCA	9p	del	tel	p	1	p	0.95	17412099	31389171	0.437912	0.806139	0.369725	0.000420593	3.37614	0.0242061	1.61607	0.597504	70
9	p21.3	CDKN2A-AS1	NR_024274	21967137	21967753	0.557915	0.557931	BLCA	9p	del	tel	p	1	p	0.95	17412099	31389171	0.437912	0.806139	0.369725	0.000420593	3.37614	0.0242061	1.61607	0.597504	70
9	p21.3	CDKN2A	NM_058195	21967750	21994490	0.557931	0.558636	BLCA	9p	del	tel	p	1	p	0.95	17412099	31389171	0.437912	0.806139	0.369725	0.000420593	3.37614	0.0242061	1.61607	0.597504	70
9	p21.3	CDKN2B-AS1	NR_047534	21994789	22121093	0.558644	0.561971	BLCA	9p	del	tel	p	1	p	0.95	17412099	31389171	0.437912	0.806139	0.369725	0.000420593	3.37614	0.0242061	1.61607	0.597504	70
9	p21.3	CDKN2B	NM_078487	22002901	22009312	0.558857	0.559026	BLCA	9p	del	tel	p	1	p	0.95	17412099	31389171	0.437912	0.806139	0.369725	0.000420593	3.37614	0.0242061	1.61607	0.597504	70
9	p21.3	DMRTA1	NM_022160	22446839	22452472	0.570553	0.570701	BLCA	9p	del	tel	p	1	p	0.95	17412099	31389171	0.437912	0.806139	0.369725	0.000420593	3.37614	0.0242061	1.61607	0.597504	70
9	p21.3	LINC01239	NR_038977	22646198	22824212	0.575805	0.580495	BLCA	9p	del	tel	p	1	p	0.95	17412099	31389171	0.437912	0.806139	0.369725	0.000420593	3.37614	0.0242061	1.61607	0.597504	70
9	p21.3	LOC101929563	NR_121602	23500688	23672397	0.598317	0.60284	BLCA	9p	del	tel	p	1	p	0.95	17412099	31389171	0.437912	0.806139	0.369725	0.000420593	3.37614	0.0242061	1.61607	0.597504	70
9	p21.3	ELAVL2	NM_001351466	23690102	23850638	0.603307	0.607536	BLCA	9p	del	tel	p	1	p	0.95	17412099	31389171	0.437912	0.806139	0.369725	0.000420593	3.37614	0.0242061	1.61607	0.597504	70
9	p21.3	IZUMO3	NM_001271706	24543212	24545674	0.625782	0.625847	BLCA	9p	del	tel	p	1	p	0.95	17412099	31389171	0.437912	0.806139	0.369725	0.000420593	3.37614	0.0242061	1.61607	0.597504	70
9	p21.2	TUSC1	NM_001004125	25676386	25678856	0.655636	0.655701	BLCA	9p	del	tel	p	1	p	0.95	17412099	31389171	0.437912	0.806139	0.369725	0.000420593	3.37614	0.0242061	1.61607	0.597504	70
9	p21.2	LINC01241	NR_121604	25780053	25812966	0.658367	0.659234	BLCA	9p	del	tel	p	1	p	0.95	17412099	31389171	0.437912	0.806139	0.369725	0.000420593	3.37614	0.0242061	1.61607	0.597504	70
9	p21.2	LOC100506422	NM_001004352	26066672	26118406	0.665918	0.667281	BLCA	9p	del	tel	p	1	p	0.95	17412099	31389171	0.437912	0.806139	0.369725	0.000420593	3.37614	0.0242061	1.61607	0.597504	70
9	p21.2	CAAP1	NM_024828	26840682	26892826	0.686309	0.687683	BLCA	9p	del	tel	p	1	p	0.95	17412099	31389171	0.437912	0.806139	0.369725	0.000420593	3.37614	0.0242061	1.61607	0.597504	70
9	p21.2	PLAA	NM_001031689	26903367	26947468	0.68796	0.689122	BLCA	9p	del	tel	p	1	p	0.95	17412099	31389171	0.437912	0.806139	0.369725	0.000420593	3.37614	0.0242061	1.61607	0.597504	70
9	p21.2	IFT74	NM_001099223	26946987	27066132	0.68911	0.692249	BLCA	9p	del	tel	p	1	p	0.95	17412099	31389171	0.437912	0.806139	0.369725	0.000420593	3.37614	0.0242061	1.61607	0.597504	70
9	p21.2	IFT74-AS1	NR_121605	26955777	26956305	0.689341	0.689355	BLCA	9p	del	tel	p	1	p	0.95	17412099	31389171	0.437912	0.806139	0.369725	0.000420593	3.37614	0.0242061	1.61607	0.597504	70
9	p21.2	LRRC19	NM_022901	26993134	27005691	0.690325	0.690656	BLCA	9p	del	tel	p	1	p	0.95	17412099	31389171	0.437912	0.806139	0.369725	0.000420593	3.37614	0.0242061	1.61607	0.597504	70
9	p21.2	TEK	NM_001290078	27109138	27230176	0.693382	0.69657	BLCA	9p	del	tel	p	1	p	0.95	17412099	31389171	0.437912	0.806139	0.369725	0.000420593	3.37614	0.0242061	1.61607	0.597504	70
9	p21.2	LINC00032	NR_026679	27245681	27282791	0.696979	0.697956	BLCA	9p	del	tel	p	1	p	0.95	17412099	31389171	0.437912	0.806139	0.369725	0.000420593	3.37614	0.0242061	1.61607	0.597504	70
9	p21.2	EQTN	NM_020641	27284653	27297137	0.698005	0.698334	BLCA	9p	del	tel	p	1	p	0.95	17412099	31389171	0.437912	0.806139	0.369725	0.000420593	3.37614	0.0242061	1.61607	0.597504	70
9	p21.2	MOB3B	NM_024761	27325206	27529850	0.699074	0.704465	BLCA	9p	del	tel	p	1	p	0.95	17412099	31389171	0.437912	0.806139	0.369725	0.000420593	3.37614	0.0242061	1.61607	0.597504	70
9	p21.2	IFNK	NM_020124	27524311	27526496	0.704319	0.704377	BLCA	9p	del	tel	p	1	p	0.95	17412099	31389171	0.437912	0.806139	0.369725	0.000420593	3.37614	0.0242061	1.61607	0.597504	70
9	p21.2	C9orf72	NM_001256054	27546543	27573864	0.704905	0.705625	BLCA	9p	del	tel	p	1	p	0.95	17412099	31389171	0.437912	0.806139	0.369725	0.000420593	3.37614	0.0242061	1.61607	0.597504	70
9	p21.1	LINGO2	NM_001258282	27937618	29213965	0.715208	0.748833	BLCA	9p	del	tel	p	1	p	0.95	17412099	31389171	0.437912	0.806139	0.369725	0.000420593	3.37614	0.0242061	1.61607	0.597504	70
9	p21.1	MIR876	NR_030597	28863623	28863704	0.739604	0.739606	BLCA	9p	del	tel	p	1	p	0.95	17412099	31389171	0.437912	0.806139	0.369725	0.000420593	3.37614	0.0242061	1.61607	0.597504	70
9	p21.1	MIR873	NR_030618	28888876	28888953	0.740269	0.740271	BLCA	9p	del	tel	p	1	p	0.95	17412099	31389171	0.437912	0.806139	0.369725	0.000420593	3.37614	0.0242061	1.61607	0.597504	70
9	p21.1	LINC01242	NR_046204	30388932	30408452	0.779788	0.780302	BLCA	9p	del	tel	p	1	p	0.95	17412099	31389171	0.437912	0.806139	0.369725	0.000420593	3.37614	0.0242061	1.61607	0.597504	70
9	p21.1	LINC01243	NR_135134	31371608	31381488	0.805677	0.805937	BLCA	9p	del	tel	p	1	p	0.95	17412099	31389171	0.437912	0.806139	0.369725	0.000420593	3.37614	0.0242061	1.61607	0.597504	70
6	q12	LOC102723883	NR_125869	68765242	68770394	0.939903	0.939856	BLCA	6q	del	tel	p	1	p	0.95	68167111	90307632	0.741665	0.945407	0.252492	5.91509e-05	4.22804	0.00440339	2.35621	0.594924	116
6	q12	LINC02549	NR_125854	68936861	69039791	0.938324	0.937376	BLCA	6q	del	tel	p	1	p	0.95	68167111	90307632	0.741665	0.945407	0.252492	5.91509e-05	4.22804	0.00440339	2.35621	0.594924	116
6	q12	LOC101928307	NR_125872	69342554	69344216	0.93459	0.934575	BLCA	6q	del	tel	p	1	p	0.95	68167111	90307632	0.741665	0.945407	0.252492	5.91509e-05	4.22804	0.00440339	2.35621	0.594924	116
6	q12	ADGRB3	NM_001704	69345631	70099403	0.934562	0.927626	BLCA	6q	del	tel	p	1	p	0.95	68167111	90307632	0.741665	0.945407	0.252492	5.91509e-05	4.22804	0.00440339	2.35621	0.594924	116
6	q13	LMBRD1	NM_018368	70385640	70507049	0.924992	0.923874	BLCA	6q	del	tel	p	1	p	0.95	68167111	90307632	0.741665	0.945407	0.252492	5.91509e-05	4.22804	0.00440339	2.35621	0.594924	116
6	q13	COL19A1	NM_001858	70576447	70922157	0.923236	0.920055	BLCA	6q	del	tel	p	1	p	0.95	68167111	90307632	0.741665	0.945407	0.252492	5.91509e-05	4.22804	0.00440339	2.35621	0.594924	116
6	q13	COL9A1	NM_001851	70925742	71012786	0.920022	0.919221	BLCA	6q	del	tel	p	1	p	0.95	68167111	90307632	0.741665	0.945407	0.252492	5.91509e-05	4.22804	0.00440339	2.35621	0.594924	116
6	q13	EVADR	NR_125857	71103904	71109120	0.918382	0.918334	BLCA	6q	del	tel	p	1	p	0.95	68167111	90307632	0.741665	0.945407	0.252492	5.91509e-05	4.22804	0.00440339	2.35621	0.594924	116
6	q13	LOC105377849	NR_147708	71122530	71123661	0.918211	0.9182	BLCA	6q	del	tel	p	1	p	0.95	68167111	90307632	0.741665	0.945407	0.252492	5.91509e-05	4.22804	0.00440339	2.35621	0.594924	116
6	q13	FAM135A	NM_001331003	71123106	71270877	0.918205	0.916846	BLCA	6q	del	tel	p	1	p	0.95	68167111	90307632	0.741665	0.945407	0.252492	5.91509e-05	4.22804	0.00440339	2.35621	0.594924	116
6	q13	SDHAF4	NM_145267	71276624	71298606	0.916793	0.91659	BLCA	6q	del	tel	p	1	p	0.95	68167111	90307632	0.741665	0.945407	0.252492	5.91509e-05	4.22804	0.00440339	2.35621	0.594924	116
6	q13	SMAP1	NM_001281439	71377473	71571716	0.915865	0.914077	BLCA	6q	del	tel	p	1	p	0.95	68167111	90307632	0.741665	0.945407	0.252492	5.91509e-05	4.22804	0.00440339	2.35621	0.594924	116
6	q13	B3GAT2	NM_080742	71571068	71666788	0.914083	0.913202	BLCA	6q	del	tel	p	1	p	0.95	68167111	90307632	0.741665	0.945407	0.252492	5.91509e-05	4.22804	0.00440339	2.35621	0.594924	116
6	q13	OGFRL1	NM_024576	71998144	72018762	0.910153	0.909963	BLCA	6q	del	tel	p	1	p	0.95	68167111	90307632	0.741665	0.945407	0.252492	5.91509e-05	4.22804	0.00440339	2.35621	0.594924	116
6	q13	MIR30C2	NR_029598	72086662	72086734	0.909338	0.909338	BLCA	6q	del	tel	p	1	p	0.95	68167111	90307632	0.741665	0.945407	0.252492	5.91509e-05	4.22804	0.00440339	2.35621	0.594924	116
6	q13	MIR30A	NR_029504	72113253	72113324	0.909094	0.909093	BLCA	6q	del	tel	p	1	p	0.95	68167111	90307632	0.741665	0.945407	0.252492	5.91509e-05	4.22804	0.00440339	2.35621	0.594924	116
6	q13	LINC00472	NR_026807	72117566	72130448	0.909054	0.908936	BLCA	6q	del	tel	p	1	p	0.95	68167111	90307632	0.741665	0.945407	0.252492	5.91509e-05	4.22804	0.00440339	2.35621	0.594924	116
6	q13	LINC01626	NR_121615	72130729	72168575	0.908933	0.908585	BLCA	6q	del	tel	p	1	p	0.95	68167111	90307632	0.741665	0.945407	0.252492	5.91509e-05	4.22804	0.00440339	2.35621	0.594924	116
6	q13	RIMS1	NM_014989	72596405	73112845	0.904648	0.899895	BLCA	6q	del	tel	p	1	p	0.95	68167111	90307632	0.741665	0.945407	0.252492	5.91509e-05	4.22804	0.00440339	2.35621	0.594924	116
6	q13	KCNQ5	NM_019842	73331570	73908573	0.897883	0.892573	BLCA	6q	del	tel	p	1	p	0.95	68167111	90307632	0.741665	0.945407	0.252492	5.91509e-05	4.22804	0.00440339	2.35621	0.594924	116
6	q13	KCNQ5-IT1	NR_120503	73340222	73388282	0.897803	0.897361	BLCA	6q	del	tel	p	1	p	0.95	68167111	90307632	0.741665	0.945407	0.252492	5.91509e-05	4.22804	0.00440339	2.35621	0.594924	116
6	q13	MIR4282	NR_036244	73677409	73677476	0.8947	0.894699	BLCA	6q	del	tel	p	1	p	0.95	68167111	90307632	0.741665	0.945407	0.252492	5.91509e-05	4.22804	0.00440339	2.35621	0.594924	116
6	q13	KCNQ5-AS1	NR_046621	73844525	73853237	0.893162	0.893082	BLCA	6q	del	tel	p	1	p	0.95	68167111	90307632	0.741665	0.945407	0.252492	5.91509e-05	4.22804	0.00440339	2.35621	0.594924	116
6	q13	KHDC1L	NM_001126063	73933267	73935175	0.892346	0.892328	BLCA	6q	del	tel	p	1	p	0.95	68167111	90307632	0.741665	0.945407	0.252492	5.91509e-05	4.22804	0.00440339	2.35621	0.594924	116
6	q13	KHDC1	NM_001251874	73951037	74019938	0.892182	0.891548	BLCA	6q	del	tel	p	1	p	0.95	68167111	90307632	0.741665	0.945407	0.252492	5.91509e-05	4.22804	0.00440339	2.35621	0.594924	116
6	q13	DPPA5	NM_001025290	74062784	74063999	0.891154	0.891143	BLCA	6q	del	tel	p	1	p	0.95	68167111	90307632	0.741665	0.945407	0.252492	5.91509e-05	4.22804	0.00440339	2.35621	0.594924	116
6	q13	KHDC3L	NM_001017361	74072399	74073898	0.891065	0.891052	BLCA	6q	del	tel	p	1	p	0.95	68167111	90307632	0.741665	0.945407	0.252492	5.91509e-05	4.22804	0.00440339	2.35621	0.594924	116
6	q13	OOEP	NM_001080507	74078279	74079515	0.891011	0.891	BLCA	6q	del	tel	p	1	p	0.95	68167111	90307632	0.741665	0.945407	0.252492	5.91509e-05	4.22804	0.00440339	2.35621	0.594924	116
6	q13	DDX43	NM_018665	74104284	74127289	0.890772	0.89056	BLCA	6q	del	tel	p	1	p	0.95	68167111	90307632	0.741665	0.945407	0.252492	5.91509e-05	4.22804	0.00440339	2.35621	0.594924	116
6	q13	CGAS	NM_138441	74134855	74162043	0.890491	0.89024	BLCA	6q	del	tel	p	1	p	0.95	68167111	90307632	0.741665	0.945407	0.252492	5.91509e-05	4.22804	0.00440339	2.35621	0.594924	116
6	q13	MTO1	NM_133645	74171453	74211179	0.890154	0.889788	BLCA	6q	del	tel	p	1	p	0.95	68167111	90307632	0.741665	0.945407	0.252492	5.91509e-05	4.22804	0.00440339	2.35621	0.594924	116
6	q13	EEF1A1	NM_001402	74225472	74230755	0.889657	0.889608	BLCA	6q	del	tel	p	1	p	0.95	68167111	90307632	0.741665	0.945407	0.252492	5.91509e-05	4.22804	0.00440339	2.35621	0.594924	116
6	q13	SNORD141A	NR_132980	74227967	74228161	0.889634	0.889632	BLCA	6q	del	tel	p	1	p	0.95	68167111	90307632	0.741665	0.945407	0.252492	5.91509e-05	4.22804	0.00440339	2.35621	0.594924	116
6	q13	SNORD141B	NR_132981	74227967	74228161	0.889634	0.889632	BLCA	6q	del	tel	p	1	p	0.95	68167111	90307632	0.741665	0.945407	0.252492	5.91509e-05	4.22804	0.00440339	2.35621	0.594924	116
6	q13	SLC17A5	NM_012434	74303101	74363737	0.888942	0.888384	BLCA	6q	del	tel	p	1	p	0.95	68167111	90307632	0.741665	0.945407	0.252492	5.91509e-05	4.22804	0.00440339	2.35621	0.594924	116
6	q13	LOC101928489	NR_110889	74403625	74405854	0.888017	0.887997	BLCA	6q	del	tel	p	1	p	0.95	68167111	90307632	0.741665	0.945407	0.252492	5.91509e-05	4.22804	0.00440339	2.35621	0.594924	116
6	q13	CD109	NM_133493	74405807	74538041	0.887997	0.88678	BLCA	6q	del	tel	p	1	p	0.95	68167111	90307632	0.741665	0.945407	0.252492	5.91509e-05	4.22804	0.00440339	2.35621	0.594924	116
6	q13	LOC101928516	NR_110856	74779166	75400443	0.884561	0.878844	BLCA	6q	del	tel	p	1	p	0.95	68167111	90307632	0.741665	0.945407	0.252492	5.91509e-05	4.22804	0.00440339	2.35621	0.594924	116
6	q13	COL12A1	NM_080645	75794041	75915623	0.875222	0.874104	BLCA	6q	del	tel	p	1	p	0.95	68167111	90307632	0.741665	0.945407	0.252492	5.91509e-05	4.22804	0.00440339	2.35621	0.594924	116
6	q13	SNORD156	NR_145788	75838424	75838498	0.874814	0.874813	BLCA	6q	del	tel	p	1	p	0.95	68167111	90307632	0.741665	0.945407	0.252492	5.91509e-05	4.22804	0.00440339	2.35621	0.594924	116
6	q14.1	COX7A2	NR_029466	75947390	75953644	0.873811	0.873754	BLCA	6q	del	tel	p	1	p	0.95	68167111	90307632	0.741665	0.945407	0.252492	5.91509e-05	4.22804	0.00440339	2.35621	0.594924	116
6	q14.1	TMEM30A	NM_001143958	75962637	75994632	0.873671	0.873376	BLCA	6q	del	tel	p	1	p	0.95	68167111	90307632	0.741665	0.945407	0.252492	5.91509e-05	4.22804	0.00440339	2.35621	0.594924	116
6	q14.1	LOC100506804	NR_040081	75994729	76001580	0.873376	0.873313	BLCA	6q	del	tel	p	1	p	0.95	68167111	90307632	0.741665	0.945407	0.252492	5.91509e-05	4.22804	0.00440339	2.35621	0.594924	116
6	q14.1	FILIP1	NM_001300866	76001573	76203630	0.873313	0.871453	BLCA	6q	del	tel	p	1	p	0.95	68167111	90307632	0.741665	0.945407	0.252492	5.91509e-05	4.22804	0.00440339	2.35621	0.594924	116
6	q14.1	LOC101928540	NR_125859	76092901	76168615	0.872472	0.871775	BLCA	6q	del	tel	p	1	p	0.95	68167111	90307632	0.741665	0.945407	0.252492	5.91509e-05	4.22804	0.00440339	2.35621	0.594924	116
6	q14.1	MIR4463	NR_039670	76138122	76138189	0.872056	0.872055	BLCA	6q	del	tel	p	1	p	0.95	68167111	90307632	0.741665	0.945407	0.252492	5.91509e-05	4.22804	0.00440339	2.35621	0.594924	116
6	q14.1	SENP6	NM_001100409	76311224	76428001	0.870463	0.869389	BLCA	6q	del	tel	p	1	p	0.95	68167111	90307632	0.741665	0.945407	0.252492	5.91509e-05	4.22804	0.00440339	2.35621	0.594924	116
6	q14.1	MYO6	NM_001300899	76458892	76629254	0.869104	0.867537	BLCA	6q	del	tel	p	1	p	0.95	68167111	90307632	0.741665	0.945407	0.252492	5.91509e-05	4.22804	0.00440339	2.35621	0.594924	116
6	q14.1	IMPG1	NM_001563	76630830	76782395	0.867522	0.866127	BLCA	6q	del	tel	p	1	p	0.95	68167111	90307632	0.741665	0.945407	0.252492	5.91509e-05	4.22804	0.00440339	2.35621	0.594924	116
6	q14.1	LINC02540	NR_149101	77232165	77303340	0.861988	0.861333	BLCA	6q	del	tel	p	1	p	0.95	68167111	90307632	0.741665	0.945407	0.252492	5.91509e-05	4.22804	0.00440339	2.35621	0.594924	116
6	q14.1	HTR1B	NM_000863	78170564	78173739	0.853353	0.853324	BLCA	6q	del	tel	p	1	p	0.95	68167111	90307632	0.741665	0.945407	0.252492	5.91509e-05	4.22804	0.00440339	2.35621	0.594924	116
6	q14.1	MEI4	NM_001282136	78359990	78636759	0.85161	0.849063	BLCA	6q	del	tel	p	1	p	0.95	68167111	90307632	0.741665	0.945407	0.252492	5.91509e-05	4.22804	0.00440339	2.35621	0.594924	116
6	q14.1	IRAK1BP1	NM_001010844	79577260	79610683	0.840408	0.840101	BLCA	6q	del	tel	p	1	p	0.95	68167111	90307632	0.741665	0.945407	0.252492	5.91509e-05	4.22804	0.00440339	2.35621	0.594924	116
6	q14.1	PHIP	NM_017934	79644135	79788015	0.839793	0.838469	BLCA	6q	del	tel	p	1	p	0.95	68167111	90307632	0.741665	0.945407	0.252492	5.91509e-05	4.22804	0.00440339	2.35621	0.594924	116
6	q14.1	HMGN3	NM_004242	79910961	79944455	0.837338	0.837029	BLCA	6q	del	tel	p	1	p	0.95	68167111	90307632	0.741665	0.945407	0.252492	5.91509e-05	4.22804	0.00440339	2.35621	0.594924	116
6	q14.1	HMGN3-AS1	NR_040671	79943390	79946517	0.837039	0.83701	BLCA	6q	del	tel	p	1	p	0.95	68167111	90307632	0.741665	0.945407	0.252492	5.91509e-05	4.22804	0.00440339	2.35621	0.594924	116
6	q14.1	LCAL1	NR_130915	80017385	80023101	0.836358	0.836306	BLCA	6q	del	tel	p	1	p	0.95	68167111	90307632	0.741665	0.945407	0.252492	5.91509e-05	4.22804	0.00440339	2.35621	0.594924	116
6	q14.1	LCA5	NM_181714	80194707	80247147	0.834726	0.834244	BLCA	6q	del	tel	p	1	p	0.95	68167111	90307632	0.741665	0.945407	0.252492	5.91509e-05	4.22804	0.00440339	2.35621	0.594924	116
6	q14.1	SH3BGRL2	NM_031469	80340821	80413387	0.833382	0.832714	BLCA	6q	del	tel	p	1	p	0.95	68167111	90307632	0.741665	0.945407	0.252492	5.91509e-05	4.22804	0.00440339	2.35621	0.594924	116
6	q14.1	RNY4	NR_004393	80451635	80451669	0.832362	0.832362	BLCA	6q	del	tel	p	1	p	0.95	68167111	90307632	0.741665	0.945407	0.252492	5.91509e-05	4.22804	0.00440339	2.35621	0.594924	116
6	q14.1	LINC01621	NR_131786	80513299	80521963	0.831795	0.831715	BLCA	6q	del	tel	p	1	p	0.95	68167111	90307632	0.741665	0.945407	0.252492	5.91509e-05	4.22804	0.00440339	2.35621	0.594924	116
6	q14.1	ELOVL4	NM_022726	80624528	80657315	0.830771	0.830469	BLCA	6q	del	tel	p	1	p	0.95	68167111	90307632	0.741665	0.945407	0.252492	5.91509e-05	4.22804	0.00440339	2.35621	0.594924	116
6	q14.1	TTK	NM_003318	80714321	80752244	0.829945	0.829596	BLCA	6q	del	tel	p	1	p	0.95	68167111	90307632	0.741665	0.945407	0.252492	5.91509e-05	4.22804	0.00440339	2.35621	0.594924	116
6	q14.1	BCKDHB	NM_183050	80816326	81055987	0.829006	0.826801	BLCA	6q	del	tel	p	1	p	0.95	68167111	90307632	0.741665	0.945407	0.252492	5.91509e-05	4.22804	0.00440339	2.35621	0.594924	116
6	q14.1	FAM46A	NM_017633	82455446	82462428	0.813923	0.813858	BLCA	6q	del	tel	p	1	p	0.95	68167111	90307632	0.741665	0.945407	0.252492	5.91509e-05	4.22804	0.00440339	2.35621	0.594924	116
6	q14.1	LINC01526	NR_126363	82523002	82523909	0.813301	0.813293	BLCA	6q	del	tel	p	1	p	0.95	68167111	90307632	0.741665	0.945407	0.252492	5.91509e-05	4.22804	0.00440339	2.35621	0.594924	116
6	q14.1	LINC02542	NR_149135	82553497	82811482	0.81302	0.810646	BLCA	6q	del	tel	p	1	p	0.95	68167111	90307632	0.741665	0.945407	0.252492	5.91509e-05	4.22804	0.00440339	2.35621	0.594924	116
6	q14.1	IBTK	NM_001300906	82879703	82957471	0.810019	0.809303	BLCA	6q	del	tel	p	1	p	0.95	68167111	90307632	0.741665	0.945407	0.252492	5.91509e-05	4.22804	0.00440339	2.35621	0.594924	116
6	q14.1	TPBG	NM_006670	83072922	83077133	0.80824	0.808202	BLCA	6q	del	tel	p	1	p	0.95	68167111	90307632	0.741665	0.945407	0.252492	5.91509e-05	4.22804	0.00440339	2.35621	0.594924	116
6	q14.1	UBE3D	NM_001304437	83602116	83775560	0.803371	0.801775	BLCA	6q	del	tel	p	1	p	0.95	68167111	90307632	0.741665	0.945407	0.252492	5.91509e-05	4.22804	0.00440339	2.35621	0.594924	116
6	q14.1	DOPEY1	NM_015018	83777384	83878190	0.801758	0.80083	BLCA	6q	del	tel	p	1	p	0.95	68167111	90307632	0.741665	0.945407	0.252492	5.91509e-05	4.22804	0.00440339	2.35621	0.594924	116
6	q14.1	PGM3	NM_001199917	83874592	83903655	0.800863	0.800596	BLCA	6q	del	tel	p	1	p	0.95	68167111	90307632	0.741665	0.945407	0.252492	5.91509e-05	4.22804	0.00440339	2.35621	0.594924	116
6	q14.2	RWDD2A	NM_033411	83903031	83908654	0.800602	0.80055	BLCA	6q	del	tel	p	1	p	0.95	68167111	90307632	0.741665	0.945407	0.252492	5.91509e-05	4.22804	0.00440339	2.35621	0.594924	116
6	q14.2	ME1	NM_002395	83920109	84140938	0.800444	0.798412	BLCA	6q	del	tel	p	1	p	0.95	68167111	90307632	0.741665	0.945407	0.252492	5.91509e-05	4.22804	0.00440339	2.35621	0.594924	116
6	q14.2	PRSS35	NM_001170423	84222193	84235421	0.797665	0.797543	BLCA	6q	del	tel	p	1	p	0.95	68167111	90307632	0.741665	0.945407	0.252492	5.91509e-05	4.22804	0.00440339	2.35621	0.594924	116
6	q14.2	SNAP91	NM_001242794	84262604	84419127	0.797293	0.795852	BLCA	6q	del	tel	p	1	p	0.95	68167111	90307632	0.741665	0.945407	0.252492	5.91509e-05	4.22804	0.00440339	2.35621	0.594924	116
6	q14.2	LOC105377879	NR_136251	84419160	84436214	0.795852	0.795695	BLCA	6q	del	tel	p	1	p	0.95	68167111	90307632	0.741665	0.945407	0.252492	5.91509e-05	4.22804	0.00440339	2.35621	0.594924	116
6	q14.2	RIPPLY2	NM_001009994	84562984	84567234	0.794529	0.794489	BLCA	6q	del	tel	p	1	p	0.95	68167111	90307632	0.741665	0.945407	0.252492	5.91509e-05	4.22804	0.00440339	2.35621	0.594924	116
6	q14.2	CYB5R4	NM_016230	84569369	84670146	0.79447	0.793542	BLCA	6q	del	tel	p	1	p	0.95	68167111	90307632	0.741665	0.945407	0.252492	5.91509e-05	4.22804	0.00440339	2.35621	0.594924	116
6	q14.2	MRAP2	NM_138409	84743377	84800605	0.792869	0.792342	BLCA	6q	del	tel	p	1	p	0.95	68167111	90307632	0.741665	0.945407	0.252492	5.91509e-05	4.22804	0.00440339	2.35621	0.594924	116
6	q14.2	CEP162	NM_014895	84833959	84937353	0.792035	0.791084	BLCA	6q	del	tel	p	1	p	0.95	68167111	90307632	0.741665	0.945407	0.252492	5.91509e-05	4.22804	0.00440339	2.35621	0.594924	116
6	q14.3	LINC01611	NR_132100	85130750	85184647	0.789304	0.788808	BLCA	6q	del	tel	p	1	p	0.95	68167111	90307632	0.741665	0.945407	0.252492	5.91509e-05	4.22804	0.00440339	2.35621	0.594924	116
6	q14.3	TBX18-AS1	NR_125875	85399175	85419252	0.786834	0.786649	BLCA	6q	del	tel	p	1	p	0.95	68167111	90307632	0.741665	0.945407	0.252492	5.91509e-05	4.22804	0.00440339	2.35621	0.594924	116
6	q14.3	TBX18	NM_001080508	85442215	85473954	0.786438	0.786146	BLCA	6q	del	tel	p	1	p	0.95	68167111	90307632	0.741665	0.945407	0.252492	5.91509e-05	4.22804	0.00440339	2.35621	0.594924	116
6	q14.3	LINC02535	NR_134633	86096936	86114520	0.780413	0.780251	BLCA	6q	del	tel	p	1	p	0.95	68167111	90307632	0.741665	0.945407	0.252492	5.91509e-05	4.22804	0.00440339	2.35621	0.594924	116
6	q14.3	NT5E	NM_001204813	86159301	86205509	0.779839	0.779414	BLCA	6q	del	tel	p	1	p	0.95	68167111	90307632	0.741665	0.945407	0.252492	5.91509e-05	4.22804	0.00440339	2.35621	0.594924	116
6	q14.3	SNX14	NM_001350538	86215214	86303874	0.779324	0.778509	BLCA	6q	del	tel	p	1	p	0.95	68167111	90307632	0.741665	0.945407	0.252492	5.91509e-05	4.22804	0.00440339	2.35621	0.594924	116
6	q14.3	SYNCRIP	NM_001159677	86317501	86353043	0.778383	0.778056	BLCA	6q	del	tel	p	1	p	0.95	68167111	90307632	0.741665	0.945407	0.252492	5.91509e-05	4.22804	0.00440339	2.35621	0.594924	116
6	q14.3	SNHG5	NR_003038	86386724	86388451	0.777746	0.77773	BLCA	6q	del	tel	p	1	p	0.95	68167111	90307632	0.741665	0.945407	0.252492	5.91509e-05	4.22804	0.00440339	2.35621	0.594924	116
6	q14.3	SNORD50A	NR_002743	86387011	86387086	0.777743	0.777743	BLCA	6q	del	tel	p	1	p	0.95	68167111	90307632	0.741665	0.945407	0.252492	5.91509e-05	4.22804	0.00440339	2.35621	0.594924	116
6	q14.3	SNORD50B	NR_003044	86387306	86387377	0.777741	0.77774	BLCA	6q	del	tel	p	1	p	0.95	68167111	90307632	0.741665	0.945407	0.252492	5.91509e-05	4.22804	0.00440339	2.35621	0.594924	116
6	q14.3	HTR1E	NM_000865	87647023	87726397	0.766149	0.765418	BLCA	6q	del	tel	p	1	p	0.95	68167111	90307632	0.741665	0.945407	0.252492	5.91509e-05	4.22804	0.00440339	2.35621	0.594924	116
6	q14.3	CGA	NM_001252383	87795215	87804865	0.764785	0.764696	BLCA	6q	del	tel	p	1	p	0.95	68167111	90307632	0.741665	0.945407	0.252492	5.91509e-05	4.22804	0.00440339	2.35621	0.594924	116
6	q14.3	ZNF292	NM_015021	87865266	87975661	0.76414	0.763124	BLCA	6q	del	tel	p	1	p	0.95	68167111	90307632	0.741665	0.945407	0.252492	5.91509e-05	4.22804	0.00440339	2.35621	0.594924	116
6	q15	GJB7	NM_198568	87992696	88038996	0.762968	0.762542	BLCA	6q	del	tel	p	1	p	0.95	68167111	90307632	0.741665	0.945407	0.252492	5.91509e-05	4.22804	0.00440339	2.35621	0.594924	116
6	q15	SMIM8	NM_001287445	88032305	88052046	0.762603	0.762421	BLCA	6q	del	tel	p	1	p	0.95	68167111	90307632	0.741665	0.945407	0.252492	5.91509e-05	4.22804	0.00440339	2.35621	0.594924	116
6	q15	C6orf163	NM_001010868	88054570	88075181	0.762398	0.762209	BLCA	6q	del	tel	p	1	p	0.95	68167111	90307632	0.741665	0.945407	0.252492	5.91509e-05	4.22804	0.00440339	2.35621	0.594924	116
6	q15	LINC01590	NR_026784	88106841	88109459	0.761917	0.761893	BLCA	6q	del	tel	p	1	p	0.95	68167111	90307632	0.741665	0.945407	0.252492	5.91509e-05	4.22804	0.00440339	2.35621	0.594924	116
6	q15	CFAP206	NM_001031743	88117689	88174191	0.761817	0.761297	BLCA	6q	del	tel	p	1	p	0.95	68167111	90307632	0.741665	0.945407	0.252492	5.91509e-05	4.22804	0.00440339	2.35621	0.594924	116
6	q15	SLC35A1	NM_001168398	88182642	88222057	0.76122	0.760857	BLCA	6q	del	tel	p	1	p	0.95	68167111	90307632	0.741665	0.945407	0.252492	5.91509e-05	4.22804	0.00440339	2.35621	0.594924	116
6	q15	RARS2	NR_146749	88223652	88299750	0.760842	0.760142	BLCA	6q	del	tel	p	1	p	0.95	68167111	90307632	0.741665	0.945407	0.252492	5.91509e-05	4.22804	0.00440339	2.35621	0.594924	116
6	q15	ORC3	NM_001197259	88299784	88377172	0.760142	0.75943	BLCA	6q	del	tel	p	1	p	0.95	68167111	90307632	0.741665	0.945407	0.252492	5.91509e-05	4.22804	0.00440339	2.35621	0.594924	116
6	q15	AKIRIN2	NM_018064	88384577	88411985	0.759361	0.759109	BLCA	6q	del	tel	p	1	p	0.95	68167111	90307632	0.741665	0.945407	0.252492	5.91509e-05	4.22804	0.00440339	2.35621	0.594924	116
6	q15	LOC101928911	NR_110869	88494577	88621449	0.758349	0.757182	BLCA	6q	del	tel	p	1	p	0.95	68167111	90307632	0.741665	0.945407	0.252492	5.91509e-05	4.22804	0.00440339	2.35621	0.594924	116
6	q15	SPACA1	NM_030960	88757506	88776550	0.75593	0.755754	BLCA	6q	del	tel	p	1	p	0.95	68167111	90307632	0.741665	0.945407	0.252492	5.91509e-05	4.22804	0.00440339	2.35621	0.594924	116
6	q15	CNR1	NM_001160258	88849584	88875767	0.755082	0.754841	BLCA	6q	del	tel	p	1	p	0.95	68167111	90307632	0.741665	0.945407	0.252492	5.91509e-05	4.22804	0.00440339	2.35621	0.594924	116
6	q15	LOC101928936	NR_110867	89235642	89249088	0.75153	0.751406	BLCA	6q	del	tel	p	1	p	0.95	68167111	90307632	0.741665	0.945407	0.252492	5.91509e-05	4.22804	0.00440339	2.35621	0.594924	116
6	q15	RNGTT	NM_001286428	89319615	89673348	0.750757	0.747502	BLCA	6q	del	tel	p	1	p	0.95	68167111	90307632	0.741665	0.945407	0.252492	5.91509e-05	4.22804	0.00440339	2.35621	0.594924	116
6	q15	PNRC1	NM_006813	89790428	89794879	0.746424	0.746384	BLCA	6q	del	tel	p	1	p	0.95	68167111	90307632	0.741665	0.945407	0.252492	5.91509e-05	4.22804	0.00440339	2.35621	0.594924	116
6	q15	SRSF12	NM_080743	89805677	89827800	0.746284	0.746081	BLCA	6q	del	tel	p	1	p	0.95	68167111	90307632	0.741665	0.945407	0.252492	5.91509e-05	4.22804	0.00440339	2.35621	0.594924	116
6	q15	PM20D2	NM_001010853	89855768	89875288	0.745823	0.745644	BLCA	6q	del	tel	p	1	p	0.95	68167111	90307632	0.741665	0.945407	0.252492	5.91509e-05	4.22804	0.00440339	2.35621	0.594924	116
6	q15	GABRR1	NM_001267582	89887222	89941007	0.745534	0.745039	BLCA	6q	del	tel	p	1	p	0.95	68167111	90307632	0.741665	0.945407	0.252492	5.91509e-05	4.22804	0.00440339	2.35621	0.594924	116
6	q15	GABRR2	NM_002043	89964185	90025018	0.744826	0.744266	BLCA	6q	del	tel	p	1	p	0.95	68167111	90307632	0.741665	0.945407	0.252492	5.91509e-05	4.22804	0.00440339	2.35621	0.594924	116
6	q15	UBE2J1	NM_016021	90036343	90062619	0.744162	0.74392	BLCA	6q	del	tel	p	1	p	0.95	68167111	90307632	0.741665	0.945407	0.252492	5.91509e-05	4.22804	0.00440339	2.35621	0.594924	116
6	q15	RRAGD	NM_021244	90074334	90121995	0.743812	0.743373	BLCA	6q	del	tel	p	1	p	0.95	68167111	90307632	0.741665	0.945407	0.252492	5.91509e-05	4.22804	0.00440339	2.35621	0.594924	116
6	q15	ANKRD6	NM_001242813	90142896	90343553	0.743181	0.741335	BLCA	6q	del	tel	p	1	p	0.95	68167111	90307632	0.741665	0.945407	0.252492	5.91509e-05	4.22804	0.00440339	2.35621	0.594924	116
6	p25.2	PXDC1	NM_183373	3722835	3752246	0.0482016	0.048725	BLCA	6p	del	tel	n	2	n-ln	0.95	3623257	7222813	0.0464295	0.110487	0.312537	0.000382711	3.41713	0.0223653	1.65043	0.515819	26
6	p25.2	FAM50B	NM_012135	3849599	3851554	0.0504575	0.0504923	BLCA	6p	del	tel	n	2	n-ln	0.95	3623257	7222813	0.0464295	0.110487	0.312537	0.000382711	3.41713	0.0223653	1.65043	0.515819	26
6	p25.2	PRPF4B	NM_003913	4021568	4065217	0.0535179	0.0542947	BLCA	6p	del	tel	n	2	n-ln	0.95	3623257	7222813	0.0464295	0.110487	0.312537	0.000382711	3.41713	0.0223653	1.65043	0.515819	26
6	p25.2	FAM217A	NM_173563	4068592	4079457	0.0543547	0.0545481	BLCA	6p	del	tel	n	2	n-ln	0.95	3623257	7222813	0.0464295	0.110487	0.312537	0.000382711	3.41713	0.0223653	1.65043	0.515819	26
6	p25.2	C6orf201	NM_001085401	4079439	4130999	0.0545478	0.0554653	BLCA	6p	del	tel	n	2	n-ln	0.95	3623257	7222813	0.0464295	0.110487	0.312537	0.000382711	3.41713	0.0223653	1.65043	0.515819	26
6	p25.2	ECI2	NR_028588	4115926	4135831	0.0551971	0.0555513	BLCA	6p	del	tel	n	2	n-ln	0.95	3623257	7222813	0.0464295	0.110487	0.312537	0.000382711	3.41713	0.0223653	1.65043	0.515819	26
6	p25.2	LOC100507506	NR_103764	4136305	4157619	0.0555598	0.0559391	BLCA	6p	del	tel	n	2	n-ln	0.95	3623257	7222813	0.0464295	0.110487	0.312537	0.000382711	3.41713	0.0223653	1.65043	0.515819	26
6	p25.2	LOC102724096	NR_125874	4186553	4190263	0.056454	0.05652	BLCA	6p	del	tel	n	2	n-ln	0.95	3623257	7222813	0.0464295	0.110487	0.312537	0.000382711	3.41713	0.0223653	1.65043	0.515819	26
6	p25.1	LINC02533	NR_149117	4489031	4496005	0.0618369	0.061961	BLCA	6p	del	tel	n	2	n-ln	0.95	3623257	7222813	0.0464295	0.110487	0.312537	0.000382711	3.41713	0.0223653	1.65043	0.515819	26
6	p25.1	KU-MEL-3	NR_122107	4610798	4612153	0.0640039	0.064028	BLCA	6p	del	tel	n	2	n-ln	0.95	3623257	7222813	0.0464295	0.110487	0.312537	0.000382711	3.41713	0.0223653	1.65043	0.515819	26
6	p25.1	CDYL	NR_026590	4706392	4955778	0.0657051	0.0701431	BLCA	6p	del	tel	n	2	n-ln	0.95	3623257	7222813	0.0464295	0.110487	0.312537	0.000382711	3.41713	0.0223653	1.65043	0.515819	26
6	p25.1	RPP40	NM_006638	4995279	5004297	0.0708461	0.0710066	BLCA	6p	del	tel	n	2	n-ln	0.95	3623257	7222813	0.0464295	0.110487	0.312537	0.000382711	3.41713	0.0223653	1.65043	0.515819	26
6	p25.1	LYRM4-AS1	NR_126015	5004049	5240729	0.0710022	0.0752142	BLCA	6p	del	tel	n	2	n-ln	0.95	3623257	7222813	0.0464295	0.110487	0.312537	0.000382711	3.41713	0.0223653	1.65043	0.515819	26
6	p25.1	LYRM4	NR_134856	5068560	5261183	0.0721502	0.0755782	BLCA	6p	del	tel	n	2	n-ln	0.95	3623257	7222813	0.0464295	0.110487	0.312537	0.000382711	3.41713	0.0223653	1.65043	0.515819	26
6	p25.1	PPP1R3G	NM_001145115	5085719	5087455	0.0724556	0.0724865	BLCA	6p	del	tel	n	2	n-ln	0.95	3623257	7222813	0.0464295	0.110487	0.312537	0.000382711	3.41713	0.0223653	1.65043	0.515819	26
6	p25.1	MIR3691	NR_037462	5148466	5148556	0.0735722	0.0735738	BLCA	6p	del	tel	n	2	n-ln	0.95	3623257	7222813	0.0464295	0.110487	0.312537	0.000382711	3.41713	0.0223653	1.65043	0.515819	26
6	p25.1	FARS2	NM_001318872	5261250	5771825	0.0755793	0.0846656	BLCA	6p	del	tel	n	2	n-ln	0.95	3623257	7222813	0.0464295	0.110487	0.312537	0.000382711	3.41713	0.0223653	1.65043	0.515819	26
6	p25.1	LOC101927972	NR_125846	5452700	5458308	0.0789864	0.0790862	BLCA	6p	del	tel	n	2	n-ln	0.95	3623257	7222813	0.0464295	0.110487	0.312537	0.000382711	3.41713	0.0223653	1.65043	0.515819	26
6	p25.1	LOC101927950	NR_110842	5665219	5695505	0.0827684	0.0833074	BLCA	6p	del	tel	n	2	n-ln	0.95	3623257	7222813	0.0464295	0.110487	0.312537	0.000382711	3.41713	0.0223653	1.65043	0.515819	26
6	p25.1	NRN1	NM_001278710	5998232	6007838	0.0886947	0.0888657	BLCA	6p	del	tel	n	2	n-ln	0.95	3623257	7222813	0.0464295	0.110487	0.312537	0.000382711	3.41713	0.0223653	1.65043	0.515819	26
6	p25.1	F13A1	NM_000129	6144310	6320924	0.0912943	0.0944374	BLCA	6p	del	tel	n	2	n-ln	0.95	3623257	7222813	0.0464295	0.110487	0.312537	0.000382711	3.41713	0.0223653	1.65043	0.515819	26
6	p25.1	MIR7853	NR_107007	6169536	6169668	0.0917433	0.0917456	BLCA	6p	del	tel	n	2	n-ln	0.95	3623257	7222813	0.0464295	0.110487	0.312537	0.000382711	3.41713	0.0223653	1.65043	0.515819	26
6	p25.1	MIR5683	NR_049863	6169566	6169642	0.0917438	0.0917451	BLCA	6p	del	tel	n	2	n-ln	0.95	3623257	7222813	0.0464295	0.110487	0.312537	0.000382711	3.41713	0.0223653	1.65043	0.515819	26
6	p25.1	LY86-AS1	NR_026970	6346697	6623059	0.094896	0.0998142	BLCA	6p	del	tel	n	2	n-ln	0.95	3623257	7222813	0.0464295	0.110487	0.312537	0.000382711	3.41713	0.0223653	1.65043	0.515819	26
6	p25.1	LY86	NM_004271	6588933	6655216	0.0992069	0.100386	BLCA	6p	del	tel	n	2	n-ln	0.95	3623257	7222813	0.0464295	0.110487	0.312537	0.000382711	3.41713	0.0223653	1.65043	0.515819	26
6	p24.3	RREB1	NM_001168344	7107829	7252213	0.108441	0.111011	BLCA	6p	del	tel	n	2	n-ln	0.95	3623257	7222813	0.0464295	0.110487	0.312537	0.000382711	3.41713	0.0223653	1.65043	0.515819	26
10	q23.2	LDB3	NM_001171610	88428205	88495824	0.507134	0.506401	BLCA	10q	del	tel	p	1	p	0.95	88455268	110561434	0.267278	0.506841	0.250163	0.000361767	3.44157	0.0212754	1.67212	0.418304	262
10	q23.2	BMPR1A	NM_004329	88516395	88684945	0.506178	0.504352	BLCA	10q	del	tel	p	1	p	0.95	88455268	110561434	0.267278	0.506841	0.250163	0.000361767	3.44157	0.0212754	1.67212	0.418304	262
10	q23.2	MMRN2	NM_024756	88695297	88717425	0.50424	0.504	BLCA	10q	del	tel	p	1	p	0.95	88455268	110561434	0.267278	0.506841	0.250163	0.000361767	3.44157	0.0212754	1.67212	0.418304	262
10	q23.2	SNCG	NM_001330120	88715557	88723017	0.50402	0.503939	BLCA	10q	del	tel	p	1	p	0.95	88455268	110561434	0.267278	0.506841	0.250163	0.000361767	3.44157	0.0212754	1.67212	0.418304	262
10	q23.2	ADIRF	NM_006829	88728187	88730666	0.503883	0.503856	BLCA	10q	del	tel	p	1	p	0.95	88455268	110561434	0.267278	0.506841	0.250163	0.000361767	3.44157	0.0212754	1.67212	0.418304	262
10	q23.2	AGAP11	NM_133447	88730497	88769960	0.503858	0.503431	BLCA	10q	del	tel	p	1	p	0.95	88455268	110561434	0.267278	0.506841	0.250163	0.000361767	3.44157	0.0212754	1.67212	0.418304	262
10	q23.2	FAM25A	NM_001146157	88780045	88784487	0.503321	0.503273	BLCA	10q	del	tel	p	1	p	0.95	88455268	110561434	0.267278	0.506841	0.250163	0.000361767	3.44157	0.0212754	1.67212	0.418304	262
10	q23.2	GLUD1	NM_005271	88809958	88854804	0.502997	0.502511	BLCA	10q	del	tel	p	1	p	0.95	88455268	110561434	0.267278	0.506841	0.250163	0.000361767	3.44157	0.0212754	1.67212	0.418304	262
10	q23.2	FAM35A	NM_001330112	88854921	88951240	0.50251	0.501466	BLCA	10q	del	tel	p	1	p	0.95	88455268	110561434	0.267278	0.506841	0.250163	0.000361767	3.44157	0.0212754	1.67212	0.418304	262
10	q23.2	NUTM2A	NM_001099338	88985204	88994733	0.501098	0.500995	BLCA	10q	del	tel	p	1	p	0.95	88455268	110561434	0.267278	0.506841	0.250163	0.000361767	3.44157	0.0212754	1.67212	0.418304	262
10	q23.2	NUTM2A-AS1	NR_024397	88998423	89102315	0.500955	0.499829	BLCA	10q	del	tel	p	1	p	0.95	88455268	110561434	0.267278	0.506841	0.250163	0.000361767	3.44157	0.0212754	1.67212	0.418304	262
10	q23.2	LINC00863	NR_135292	89102492	89117059	0.499827	0.499669	BLCA	10q	del	tel	p	1	p	0.95	88455268	110561434	0.267278	0.506841	0.250163	0.000361767	3.44157	0.0212754	1.67212	0.418304	262
10	q23.2	NUTM2D	NM_001009610	89117476	89130452	0.499665	0.499524	BLCA	10q	del	tel	p	1	p	0.95	88455268	110561434	0.267278	0.506841	0.250163	0.000361767	3.44157	0.0212754	1.67212	0.418304	262
10	q23.2	LINC00864	NR_046091	89156330	89167457	0.499244	0.499123	BLCA	10q	del	tel	p	1	p	0.95	88455268	110561434	0.267278	0.506841	0.250163	0.000361767	3.44157	0.0212754	1.67212	0.418304	262
10	q23.2	MIR4678	NR_039825	89263637	89263711	0.498081	0.49808	BLCA	10q	del	tel	p	1	p	0.95	88455268	110561434	0.267278	0.506841	0.250163	0.000361767	3.44157	0.0212754	1.67212	0.418304	262
10	q23.2	MINPP1	NM_004897	89264222	89313218	0.498074	0.497543	BLCA	10q	del	tel	p	1	p	0.95	88455268	110561434	0.267278	0.506841	0.250163	0.000361767	3.44157	0.0212754	1.67212	0.418304	262
10	q23.2	PAPSS2	NM_004670	89419475	89507462	0.496392	0.495438	BLCA	10q	del	tel	p	1	p	0.95	88455268	110561434	0.267278	0.506841	0.250163	0.000361767	3.44157	0.0212754	1.67212	0.418304	262
10	q23.31	ATAD1	NM_001321969	89511268	89577988	0.495397	0.494674	BLCA	10q	del	tel	p	1	p	0.95	88455268	110561434	0.267278	0.506841	0.250163	0.000361767	3.44157	0.0212754	1.67212	0.418304	262
10	q23.31	CFL1P1	NR_028492	89578069	89605369	0.494673	0.494377	BLCA	10q	del	tel	p	1	p	0.95	88455268	110561434	0.267278	0.506841	0.250163	0.000361767	3.44157	0.0212754	1.67212	0.418304	262
10	q23.31	KLLN	NM_001126049	89618917	89623194	0.494231	0.494184	BLCA	10q	del	tel	p	1	p	0.95	88455268	110561434	0.267278	0.506841	0.250163	0.000361767	3.44157	0.0212754	1.67212	0.418304	262
10	q23.31	PTEN	NM_001304718	89623194	89731687	0.494184	0.493008	BLCA	10q	del	tel	p	1	p	0.95	88455268	110561434	0.267278	0.506841	0.250163	0.000361767	3.44157	0.0212754	1.67212	0.418304	262
10	q23.31	RNLS	NM_018363	90033620	90343082	0.489736	0.486383	BLCA	10q	del	tel	p	1	p	0.95	88455268	110561434	0.267278	0.506841	0.250163	0.000361767	3.44157	0.0212754	1.67212	0.418304	262
10	q23.31	LIPJ	NM_001010939	90346518	90366733	0.486346	0.486127	BLCA	10q	del	tel	p	1	p	0.95	88455268	110561434	0.267278	0.506841	0.250163	0.000361767	3.44157	0.0212754	1.67212	0.418304	262
10	q23.31	LIPF	NM_001198828	90424145	90438572	0.485504	0.485348	BLCA	10q	del	tel	p	1	p	0.95	88455268	110561434	0.267278	0.506841	0.250163	0.000361767	3.44157	0.0212754	1.67212	0.418304	262
10	q23.31	LIPK	NM_001080518	90484300	90512513	0.484852	0.484547	BLCA	10q	del	tel	p	1	p	0.95	88455268	110561434	0.267278	0.506841	0.250163	0.000361767	3.44157	0.0212754	1.67212	0.418304	262
10	q23.31	LIPN	NM_001102469	90521162	90537999	0.484453	0.484271	BLCA	10q	del	tel	p	1	p	0.95	88455268	110561434	0.267278	0.506841	0.250163	0.000361767	3.44157	0.0212754	1.67212	0.418304	262
10	q23.31	LIPM	NM_001128215	90562486	90580303	0.484005	0.483812	BLCA	10q	del	tel	p	1	p	0.95	88455268	110561434	0.267278	0.506841	0.250163	0.000361767	3.44157	0.0212754	1.67212	0.418304	262
10	q23.31	ANKRD22	NM_144590	90579658	90611732	0.483819	0.483471	BLCA	10q	del	tel	p	1	p	0.95	88455268	110561434	0.267278	0.506841	0.250163	0.000361767	3.44157	0.0212754	1.67212	0.418304	262
10	q23.31	STAMBPL1	NM_020799	90639943	90683259	0.483166	0.482696	BLCA	10q	del	tel	p	1	p	0.95	88455268	110561434	0.267278	0.506841	0.250163	0.000361767	3.44157	0.0212754	1.67212	0.418304	262
10	q23.31	ACTA2-AS1	NR_125373	90692440	90699731	0.482597	0.482518	BLCA	10q	del	tel	p	1	p	0.95	88455268	110561434	0.267278	0.506841	0.250163	0.000361767	3.44157	0.0212754	1.67212	0.418304	262
10	q23.31	ACTA2	NM_001141945	90694830	90751154	0.482571	0.481961	BLCA	10q	del	tel	p	1	p	0.95	88455268	110561434	0.267278	0.506841	0.250163	0.000361767	3.44157	0.0212754	1.67212	0.418304	262
10	q23.31	FAS	NR_135313	90750315	90776818	0.48197	0.481682	BLCA	10q	del	tel	p	1	p	0.95	88455268	110561434	0.267278	0.506841	0.250163	0.000361767	3.44157	0.0212754	1.67212	0.418304	262
10	q23.31	FAS-AS1	NR_028371	90751180	90752732	0.48196	0.481943	BLCA	10q	del	tel	p	1	p	0.95	88455268	110561434	0.267278	0.506841	0.250163	0.000361767	3.44157	0.0212754	1.67212	0.418304	262
10	q23.31	MIR4679-2	NR_039827	90823091	90823168	0.481181	0.48118	BLCA	10q	del	tel	p	1	p	0.95	88455268	110561434	0.267278	0.506841	0.250163	0.000361767	3.44157	0.0212754	1.67212	0.418304	262
10	q23.31	MIR4679-1	NR_039826	90823092	90823167	0.481181	0.48118	BLCA	10q	del	tel	p	1	p	0.95	88455268	110561434	0.267278	0.506841	0.250163	0.000361767	3.44157	0.0212754	1.67212	0.418304	262
10	q23.31	CH25H	NM_003956	90965693	90967071	0.479636	0.479621	BLCA	10q	del	tel	p	1	p	0.95	88455268	110561434	0.267278	0.506841	0.250163	0.000361767	3.44157	0.0212754	1.67212	0.418304	262
10	q23.31	LIPA	NM_001288979	90973325	91011796	0.479553	0.479136	BLCA	10q	del	tel	p	1	p	0.95	88455268	110561434	0.267278	0.506841	0.250163	0.000361767	3.44157	0.0212754	1.67212	0.418304	262
10	q23.31	IFIT2	NM_001547	91061705	91069033	0.478595	0.478516	BLCA	10q	del	tel	p	1	p	0.95	88455268	110561434	0.267278	0.506841	0.250163	0.000361767	3.44157	0.0212754	1.67212	0.418304	262
10	q23.31	IFIT3	NM_001549	91087575	91100725	0.478315	0.478172	BLCA	10q	del	tel	p	1	p	0.95	88455268	110561434	0.267278	0.506841	0.250163	0.000361767	3.44157	0.0212754	1.67212	0.418304	262
10	q23.31	IFIT1B	NM_001010987	91137812	91144962	0.47777	0.477693	BLCA	10q	del	tel	p	1	p	0.95	88455268	110561434	0.267278	0.506841	0.250163	0.000361767	3.44157	0.0212754	1.67212	0.418304	262
10	q23.31	IFIT1	NM_001548	91152302	91166244	0.477613	0.477462	BLCA	10q	del	tel	p	1	p	0.95	88455268	110561434	0.267278	0.506841	0.250163	0.000361767	3.44157	0.0212754	1.67212	0.418304	262
10	q23.31	IFIT5	NM_012420	91174324	91180759	0.477375	0.477305	BLCA	10q	del	tel	p	1	p	0.95	88455268	110561434	0.267278	0.506841	0.250163	0.000361767	3.44157	0.0212754	1.67212	0.418304	262
10	q23.31	SLC16A12	NM_213606	91190050	91295313	0.477204	0.476064	BLCA	10q	del	tel	p	1	p	0.95	88455268	110561434	0.267278	0.506841	0.250163	0.000361767	3.44157	0.0212754	1.67212	0.418304	262
10	q23.31	SLC16A12-AS1	NR_120614	91215747	91227908	0.476926	0.476794	BLCA	10q	del	tel	p	1	p	0.95	88455268	110561434	0.267278	0.506841	0.250163	0.000361767	3.44157	0.0212754	1.67212	0.418304	262
10	q23.31	PANK1	NM_148977	91339253	91405329	0.475587	0.474871	BLCA	10q	del	tel	p	1	p	0.95	88455268	110561434	0.267278	0.506841	0.250163	0.000361767	3.44157	0.0212754	1.67212	0.418304	262
10	q23.31	MIR107	NR_029524	91352503	91352584	0.475444	0.475443	BLCA	10q	del	tel	p	1	p	0.95	88455268	110561434	0.267278	0.506841	0.250163	0.000361767	3.44157	0.0212754	1.67212	0.418304	262
10	q23.31	FLJ37201	NR_026835	91451056	91457685	0.474376	0.474304	BLCA	10q	del	tel	p	1	p	0.95	88455268	110561434	0.267278	0.506841	0.250163	0.000361767	3.44157	0.0212754	1.67212	0.418304	262
10	q23.31	KIF20B	NM_016195	91461346	91534700	0.474264	0.473469	BLCA	10q	del	tel	p	1	p	0.95	88455268	110561434	0.267278	0.506841	0.250163	0.000361767	3.44157	0.0212754	1.67212	0.418304	262
10	q23.31	LINC00865	NR_038382	91589249	91600618	0.472878	0.472755	BLCA	10q	del	tel	p	1	p	0.95	88455268	110561434	0.267278	0.506841	0.250163	0.000361767	3.44157	0.0212754	1.67212	0.418304	262
10	q23.31	LINC01374	NR_149080	91613662	91674713	0.472614	0.471952	BLCA	10q	del	tel	p	1	p	0.95	88455268	110561434	0.267278	0.506841	0.250163	0.000361767	3.44157	0.0212754	1.67212	0.418304	262
10	q23.31	LINC01375	NR_110655	91675245	91717130	0.471946	0.471492	BLCA	10q	del	tel	p	1	p	0.95	88455268	110561434	0.267278	0.506841	0.250163	0.000361767	3.44157	0.0212754	1.67212	0.418304	262
10	q23.31	LOC101926942	NR_110657	92162277	92300562	0.466668	0.46517	BLCA	10q	del	tel	p	1	p	0.95	88455268	110561434	0.267278	0.506841	0.250163	0.000361767	3.44157	0.0212754	1.67212	0.418304	262
10	q23.31	HTR7	NM_019859	92500575	92617671	0.463002	0.461733	BLCA	10q	del	tel	p	1	p	0.95	88455268	110561434	0.267278	0.506841	0.250163	0.000361767	3.44157	0.0212754	1.67212	0.418304	262
10	q23.31	RPP30	NM_001104546	92631708	92668312	0.461581	0.461184	BLCA	10q	del	tel	p	1	p	0.95	88455268	110561434	0.267278	0.506841	0.250163	0.000361767	3.44157	0.0212754	1.67212	0.418304	262
10	q23.31	ANKRD1	NM_014391	92671856	92681032	0.461146	0.461047	BLCA	10q	del	tel	p	1	p	0.95	88455268	110561434	0.267278	0.506841	0.250163	0.000361767	3.44157	0.0212754	1.67212	0.418304	262
10	q23.31	XLOC_008559	NR_131214	92707056	92751889	0.460765	0.460279	BLCA	10q	del	tel	p	1	p	0.95	88455268	110561434	0.267278	0.506841	0.250163	0.000361767	3.44157	0.0212754	1.67212	0.418304	262
10	q23.31	LOC105378430	NR_134319	92792922	92801012	0.459834	0.459746	BLCA	10q	del	tel	p	1	p	0.95	88455268	110561434	0.267278	0.506841	0.250163	0.000361767	3.44157	0.0212754	1.67212	0.418304	262
10	q23.31	LINC00502	NR_047467	92805564	92821916	0.459697	0.45952	BLCA	10q	del	tel	p	1	p	0.95	88455268	110561434	0.267278	0.506841	0.250163	0.000361767	3.44157	0.0212754	1.67212	0.418304	262
10	q23.32	NUDT9P1	NR_002779	92911760	92912837	0.458546	0.458535	BLCA	10q	del	tel	p	1	p	0.95	88455268	110561434	0.267278	0.506841	0.250163	0.000361767	3.44157	0.0212754	1.67212	0.418304	262
10	q23.32	PCGF5	NM_001257101	92922768	93044088	0.458427	0.457112	BLCA	10q	del	tel	p	1	p	0.95	88455268	110561434	0.267278	0.506841	0.250163	0.000361767	3.44157	0.0212754	1.67212	0.418304	262
10	q23.32	HECTD2-AS1	NR_024467	93066718	93371217	0.456867	0.453567	BLCA	10q	del	tel	p	1	p	0.95	88455268	110561434	0.267278	0.506841	0.250163	0.000361767	3.44157	0.0212754	1.67212	0.418304	262
10	q23.32	HECTD2	NM_001348365	93168991	93274585	0.455759	0.454614	BLCA	10q	del	tel	p	1	p	0.95	88455268	110561434	0.267278	0.506841	0.250163	0.000361767	3.44157	0.0212754	1.67212	0.418304	262
10	q23.32	PPP1R3C	NM_005398	93388197	93392858	0.453383	0.453333	BLCA	10q	del	tel	p	1	p	0.95	88455268	110561434	0.267278	0.506841	0.250163	0.000361767	3.44157	0.0212754	1.67212	0.418304	262
10	q23.32	TNKS2-AS1	NR_108071	93542595	93558048	0.45171	0.451542	BLCA	10q	del	tel	p	1	p	0.95	88455268	110561434	0.267278	0.506841	0.250163	0.000361767	3.44157	0.0212754	1.67212	0.418304	262
10	q23.32	TNKS2	NM_025235	93558150	93625232	0.451541	0.450814	BLCA	10q	del	tel	p	1	p	0.95	88455268	110561434	0.267278	0.506841	0.250163	0.000361767	3.44157	0.0212754	1.67212	0.418304	262
10	q23.32	FGFBP3	NM_152429	93666344	93669258	0.450369	0.450337	BLCA	10q	del	tel	p	1	p	0.95	88455268	110561434	0.267278	0.506841	0.250163	0.000361767	3.44157	0.0212754	1.67212	0.418304	262
10	q23.32	BTAF1	NM_003972	93683735	93790080	0.45018	0.449028	BLCA	10q	del	tel	p	1	p	0.95	88455268	110561434	0.267278	0.506841	0.250163	0.000361767	3.44157	0.0212754	1.67212	0.418304	262
10	q23.32	CPEB3	NM_014912	93808396	94050875	0.448829	0.446202	BLCA	10q	del	tel	p	1	p	0.95	88455268	110561434	0.267278	0.506841	0.250163	0.000361767	3.44157	0.0212754	1.67212	0.418304	262
10	q23.32	MARCH5	NM_017824	94050919	94113721	0.446201	0.445521	BLCA	10q	del	tel	p	1	p	0.95	88455268	110561434	0.267278	0.506841	0.250163	0.000361767	3.44157	0.0212754	1.67212	0.418304	262
10	q23.33	MARK2P9	NR_038243	94178417	94179363	0.44482	0.444809	BLCA	10q	del	tel	p	1	p	0.95	88455268	110561434	0.267278	0.506841	0.250163	0.000361767	3.44157	0.0212754	1.67212	0.418304	262
10	q23.33	IDE	NM_001322794	94211440	94333852	0.444462	0.443135	BLCA	10q	del	tel	p	1	p	0.95	88455268	110561434	0.267278	0.506841	0.250163	0.000361767	3.44157	0.0212754	1.67212	0.418304	262
10	q23.33	KIF11	NM_004523	94352824	94415152	0.44293	0.442254	BLCA	10q	del	tel	p	1	p	0.95	88455268	110561434	0.267278	0.506841	0.250163	0.000361767	3.44157	0.0212754	1.67212	0.418304	262
10	q23.33	HHEX	NM_002729	94449680	94455408	0.44188	0.441818	BLCA	10q	del	tel	p	1	p	0.95	88455268	110561434	0.267278	0.506841	0.250163	0.000361767	3.44157	0.0212754	1.67212	0.418304	262
10	q23.33	EXOC6	NM_001013848	94586587	94819251	0.440396	0.437875	BLCA	10q	del	tel	p	1	p	0.95	88455268	110561434	0.267278	0.506841	0.250163	0.000361767	3.44157	0.0212754	1.67212	0.418304	262
10	q23.33	CYP26C1	NM_183374	94821020	94828454	0.437856	0.437775	BLCA	10q	del	tel	p	1	p	0.95	88455268	110561434	0.267278	0.506841	0.250163	0.000361767	3.44157	0.0212754	1.67212	0.418304	262
10	q23.33	CYP26A1	NM_057157	94833231	94837641	0.437723	0.437676	BLCA	10q	del	tel	p	1	p	0.95	88455268	110561434	0.267278	0.506841	0.250163	0.000361767	3.44157	0.0212754	1.67212	0.418304	262
10	q23.33	MYOF	NM_013451	95066185	95242074	0.435199	0.433293	BLCA	10q	del	tel	p	1	p	0.95	88455268	110561434	0.267278	0.506841	0.250163	0.000361767	3.44157	0.0212754	1.67212	0.418304	262
10	q23.33	CEP55	NM_001127182	95256368	95288849	0.433138	0.432786	BLCA	10q	del	tel	p	1	p	0.95	88455268	110561434	0.267278	0.506841	0.250163	0.000361767	3.44157	0.0212754	1.67212	0.418304	262
10	q23.33	FFAR4	NM_001195755	95326421	95349829	0.432379	0.432125	BLCA	10q	del	tel	p	1	p	0.95	88455268	110561434	0.267278	0.506841	0.250163	0.000361767	3.44157	0.0212754	1.67212	0.418304	262
10	q23.33	RBP4	NM_001323518	95351592	95361501	0.432106	0.431999	BLCA	10q	del	tel	p	1	p	0.95	88455268	110561434	0.267278	0.506841	0.250163	0.000361767	3.44157	0.0212754	1.67212	0.418304	262
10	q23.33	PDE6C	NM_006204	95372344	95425429	0.431881	0.431306	BLCA	10q	del	tel	p	1	p	0.95	88455268	110561434	0.267278	0.506841	0.250163	0.000361767	3.44157	0.0212754	1.67212	0.418304	262
10	q23.33	FRA10AC1	NM_001347714	95427639	95462716	0.431282	0.430902	BLCA	10q	del	tel	p	1	p	0.95	88455268	110561434	0.267278	0.506841	0.250163	0.000361767	3.44157	0.0212754	1.67212	0.418304	262
10	q23.33	LGI1	NR_131777	95517565	95557931	0.430307	0.42987	BLCA	10q	del	tel	p	1	p	0.95	88455268	110561434	0.267278	0.506841	0.250163	0.000361767	3.44157	0.0212754	1.67212	0.418304	262
10	q23.33	SLC35G1	NR_144335	95653726	95669590	0.428832	0.42866	BLCA	10q	del	tel	p	1	p	0.95	88455268	110561434	0.267278	0.506841	0.250163	0.000361767	3.44157	0.0212754	1.67212	0.418304	262
10	q23.33	PIPSL	NR_002319	95717896	95721672	0.428136	0.428095	BLCA	10q	del	tel	p	1	p	0.95	88455268	110561434	0.267278	0.506841	0.250163	0.000361767	3.44157	0.0212754	1.67212	0.418304	262
10	q23.33	PLCE1	NM_001288989	95753745	96088148	0.427748	0.424124	BLCA	10q	del	tel	p	1	p	0.95	88455268	110561434	0.267278	0.506841	0.250163	0.000361767	3.44157	0.0212754	1.67212	0.418304	262
10	q23.33	PLCE1-AS2	NR_120616	95841706	95868551	0.426795	0.426504	BLCA	10q	del	tel	p	1	p	0.95	88455268	110561434	0.267278	0.506841	0.250163	0.000361767	3.44157	0.0212754	1.67212	0.418304	262
10	q23.33	PLCE1-AS1	NR_033969	96039046	96046827	0.424656	0.424572	BLCA	10q	del	tel	p	1	p	0.95	88455268	110561434	0.267278	0.506841	0.250163	0.000361767	3.44157	0.0212754	1.67212	0.418304	262
10	q23.33	NOC3L	NM_022451	96092982	96122733	0.424072	0.423749	BLCA	10q	del	tel	p	1	p	0.95	88455268	110561434	0.267278	0.506841	0.250163	0.000361767	3.44157	0.0212754	1.67212	0.418304	262
10	q23.33	TBC1D12	NM_015188	96162185	96296089	0.423322	0.421871	BLCA	10q	del	tel	p	1	p	0.95	88455268	110561434	0.267278	0.506841	0.250163	0.000361767	3.44157	0.0212754	1.67212	0.418304	262
10	q23.33	HELLS	NM_001289068	96305523	96361856	0.421768	0.421158	BLCA	10q	del	tel	p	1	p	0.95	88455268	110561434	0.267278	0.506841	0.250163	0.000361767	3.44157	0.0212754	1.67212	0.418304	262
10	q23.33	CYP2C18	NM_001128925	96443250	96495947	0.420276	0.419705	BLCA	10q	del	tel	p	1	p	0.95	88455268	110561434	0.267278	0.506841	0.250163	0.000361767	3.44157	0.0212754	1.67212	0.418304	262
10	q23.33	CYP2C19	NM_000769	96522437	96612962	0.419418	0.418437	BLCA	10q	del	tel	p	1	p	0.95	88455268	110561434	0.267278	0.506841	0.250163	0.000361767	3.44157	0.0212754	1.67212	0.418304	262
10	q23.33	CYP2C9	NM_000771	96698414	96749148	0.417511	0.416961	BLCA	10q	del	tel	p	1	p	0.95	88455268	110561434	0.267278	0.506841	0.250163	0.000361767	3.44157	0.0212754	1.67212	0.418304	262
10	q23.33	CYP2C8	NM_001198853	96796528	96829254	0.416447	0.416093	BLCA	10q	del	tel	p	1	p	0.95	88455268	110561434	0.267278	0.506841	0.250163	0.000361767	3.44157	0.0212754	1.67212	0.418304	262
10	q23.33	ACSM6	NM_207321	96953956	96988686	0.414741	0.414365	BLCA	10q	del	tel	p	1	p	0.95	88455268	110561434	0.267278	0.506841	0.250163	0.000361767	3.44157	0.0212754	1.67212	0.418304	262
10	q24.1	PDLIM1	NM_020992	96997324	97050905	0.414271	0.413691	BLCA	10q	del	tel	p	1	p	0.95	88455268	110561434	0.267278	0.506841	0.250163	0.000361767	3.44157	0.0212754	1.67212	0.418304	262
10	q24.1	SORBS1	NM_024991	97071529	97321177	0.413467	0.410762	BLCA	10q	del	tel	p	1	p	0.95	88455268	110561434	0.267278	0.506841	0.250163	0.000361767	3.44157	0.0212754	1.67212	0.418304	262
10	q24.1	ALDH18A1	NM_001323412	97365685	97416567	0.410279	0.409728	BLCA	10q	del	tel	p	1	p	0.95	88455268	110561434	0.267278	0.506841	0.250163	0.000361767	3.44157	0.0212754	1.67212	0.418304	262
10	q24.1	TCTN3	NM_015631	97423152	97453900	0.409657	0.409323	BLCA	10q	del	tel	p	1	p	0.95	88455268	110561434	0.267278	0.506841	0.250163	0.000361767	3.44157	0.0212754	1.67212	0.418304	262
10	q24.1	ENTPD1	NM_001098175	97471535	97637023	0.409132	0.407339	BLCA	10q	del	tel	p	1	p	0.95	88455268	110561434	0.267278	0.506841	0.250163	0.000361767	3.44157	0.0212754	1.67212	0.418304	262
10	q24.1	ENTPD1-AS1	NR_038444	97512962	97849992	0.408683	0.405031	BLCA	10q	del	tel	p	1	p	0.95	88455268	110561434	0.267278	0.506841	0.250163	0.000361767	3.44157	0.0212754	1.67212	0.418304	262
10	q24.1	CC2D2B	NM_001349008	97667721	97792441	0.407006	0.405655	BLCA	10q	del	tel	p	1	p	0.95	88455268	110561434	0.267278	0.506841	0.250163	0.000361767	3.44157	0.0212754	1.67212	0.418304	262
10	q24.1	CCNJ	NM_019084	97803158	97820625	0.405539	0.405349	BLCA	10q	del	tel	p	1	p	0.95	88455268	110561434	0.267278	0.506841	0.250163	0.000361767	3.44157	0.0212754	1.67212	0.418304	262
10	q24.1	MIR3157	NR_036113	97824071	97824156	0.405312	0.405311	BLCA	10q	del	tel	p	1	p	0.95	88455268	110561434	0.267278	0.506841	0.250163	0.000361767	3.44157	0.0212754	1.67212	0.418304	262
10	q24.1	ZNF518A	NR_138482	97889471	97965047	0.404603	0.403784	BLCA	10q	del	tel	p	1	p	0.95	88455268	110561434	0.267278	0.506841	0.250163	0.000361767	3.44157	0.0212754	1.67212	0.418304	262
10	q24.1	BLNK	NM_001114094	97951454	98031333	0.403931	0.403066	BLCA	10q	del	tel	p	1	p	0.95	88455268	110561434	0.267278	0.506841	0.250163	0.000361767	3.44157	0.0212754	1.67212	0.418304	262
10	q24.1	DNTT	NM_004088	98064084	98098321	0.402711	0.40234	BLCA	10q	del	tel	p	1	p	0.95	88455268	110561434	0.267278	0.506841	0.250163	0.000361767	3.44157	0.0212754	1.67212	0.418304	262
10	q24.1	OPALIN	NM_001284320	98102974	98119122	0.402289	0.402114	BLCA	10q	del	tel	p	1	p	0.95	88455268	110561434	0.267278	0.506841	0.250163	0.000361767	3.44157	0.0212754	1.67212	0.418304	262
10	q24.1	TLL2	NM_012465	98124362	98273683	0.402058	0.40044	BLCA	10q	del	tel	p	1	p	0.95	88455268	110561434	0.267278	0.506841	0.250163	0.000361767	3.44157	0.0212754	1.67212	0.418304	262
10	q24.1	TM9SF3	NM_020123	98277866	98346809	0.400394	0.399647	BLCA	10q	del	tel	p	1	p	0.95	88455268	110561434	0.267278	0.506841	0.250163	0.000361767	3.44157	0.0212754	1.67212	0.418304	262
10	q24.1	PIK3AP1	NM_152309	98353068	98480279	0.399579	0.398201	BLCA	10q	del	tel	p	1	p	0.95	88455268	110561434	0.267278	0.506841	0.250163	0.000361767	3.44157	0.0212754	1.67212	0.418304	262
10	q24.1	MIR607	NR_030338	98588425	98588521	0.397029	0.397028	BLCA	10q	del	tel	p	1	p	0.95	88455268	110561434	0.267278	0.506841	0.250163	0.000361767	3.44157	0.0212754	1.67212	0.418304	262
10	q24.1	LOC102723665	NR_135921	98590388	98592215	0.397007	0.396988	BLCA	10q	del	tel	p	1	p	0.95	88455268	110561434	0.267278	0.506841	0.250163	0.000361767	3.44157	0.0212754	1.67212	0.418304	262
10	q24.1	LCOR	NM_001346516	98592016	98745969	0.39699	0.395321	BLCA	10q	del	tel	p	1	p	0.95	88455268	110561434	0.267278	0.506841	0.250163	0.000361767	3.44157	0.0212754	1.67212	0.418304	262
10	q24.1	SLIT1	NM_003061	98757794	98945683	0.395193	0.393157	BLCA	10q	del	tel	p	1	p	0.95	88455268	110561434	0.267278	0.506841	0.250163	0.000361767	3.44157	0.0212754	1.67212	0.418304	262
10	q24.1	SLIT1-AS1	NR_038330	98862512	98863504	0.394058	0.394048	BLCA	10q	del	tel	p	1	p	0.95	88455268	110561434	0.267278	0.506841	0.250163	0.000361767	3.44157	0.0212754	1.67212	0.418304	262
10	q24.1	ARHGAP19-SLIT1	NR_037909	98912798	99052430	0.393513	0.392	BLCA	10q	del	tel	p	1	p	0.95	88455268	110561434	0.267278	0.506841	0.250163	0.000361767	3.44157	0.0212754	1.67212	0.418304	262
10	q24.1	ARHGAP19	NM_032900	98981929	99052430	0.392764	0.392	BLCA	10q	del	tel	p	1	p	0.95	88455268	110561434	0.267278	0.506841	0.250163	0.000361767	3.44157	0.0212754	1.67212	0.418304	262
10	q24.1	FRAT1	NM_005479	99079021	99081672	0.391712	0.391683	BLCA	10q	del	tel	p	1	p	0.95	88455268	110561434	0.267278	0.506841	0.250163	0.000361767	3.44157	0.0212754	1.67212	0.418304	262
10	q24.1	FRAT2	NM_012083	99092253	99094458	0.391569	0.391545	BLCA	10q	del	tel	p	1	p	0.95	88455268	110561434	0.267278	0.506841	0.250163	0.000361767	3.44157	0.0212754	1.67212	0.418304	262
10	q24.1	RRP12	NM_001145114	99116457	99161127	0.391306	0.390822	BLCA	10q	del	tel	p	1	p	0.95	88455268	110561434	0.267278	0.506841	0.250163	0.000361767	3.44157	0.0212754	1.67212	0.418304	262
10	q24.1	PGAM1	NM_002629	99185881	99193201	0.390554	0.390475	BLCA	10q	del	tel	p	1	p	0.95	88455268	110561434	0.267278	0.506841	0.250163	0.000361767	3.44157	0.0212754	1.67212	0.418304	262
10	q24.1	EXOSC1	NM_001318366	99195665	99205774	0.390448	0.390339	BLCA	10q	del	tel	p	1	p	0.95	88455268	110561434	0.267278	0.506841	0.250163	0.000361767	3.44157	0.0212754	1.67212	0.418304	262
10	q24.1	ZDHHC16	NR_109895	99205887	99217127	0.390337	0.390215	BLCA	10q	del	tel	p	1	p	0.95	88455268	110561434	0.267278	0.506841	0.250163	0.000361767	3.44157	0.0212754	1.67212	0.418304	262
10	q24.1	MMS19	NM_001289405	99218080	99258551	0.390205	0.389767	BLCA	10q	del	tel	p	1	p	0.95	88455268	110561434	0.267278	0.506841	0.250163	0.000361767	3.44157	0.0212754	1.67212	0.418304	262
10	q24.1	UBTD1	NM_024954	99258638	99330967	0.389766	0.388982	BLCA	10q	del	tel	p	1	p	0.95	88455268	110561434	0.267278	0.506841	0.250163	0.000361767	3.44157	0.0212754	1.67212	0.418304	262
10	q24.2	ANKRD2	NM_001346797	99332197	99343653	0.388968	0.388844	BLCA	10q	del	tel	p	1	p	0.95	88455268	110561434	0.267278	0.506841	0.250163	0.000361767	3.44157	0.0212754	1.67212	0.418304	262
10	q24.2	HOGA1	NM_001134670	99344101	99372555	0.388839	0.388531	BLCA	10q	del	tel	p	1	p	0.95	88455268	110561434	0.267278	0.506841	0.250163	0.000361767	3.44157	0.0212754	1.67212	0.418304	262
10	q24.2	C10orf62	NM_001009997	99349449	99350691	0.388782	0.388768	BLCA	10q	del	tel	p	1	p	0.95	88455268	110561434	0.267278	0.506841	0.250163	0.000361767	3.44157	0.0212754	1.67212	0.418304	262
10	q24.2	MORN4	NM_001098831	99374309	99393913	0.388512	0.3883	BLCA	10q	del	tel	p	1	p	0.95	88455268	110561434	0.267278	0.506841	0.250163	0.000361767	3.44157	0.0212754	1.67212	0.418304	262
10	q24.2	PI4K2A	NM_018425	99400442	99436189	0.388229	0.387842	BLCA	10q	del	tel	p	1	p	0.95	88455268	110561434	0.267278	0.506841	0.250163	0.000361767	3.44157	0.0212754	1.67212	0.418304	262
10	q24.2	AVPI1	NM_021732	99437180	99447015	0.387831	0.387724	BLCA	10q	del	tel	p	1	p	0.95	88455268	110561434	0.267278	0.506841	0.250163	0.000361767	3.44157	0.0212754	1.67212	0.418304	262
10	q24.2	MARVELD1	NM_031484	99473464	99477909	0.387438	0.387389	BLCA	10q	del	tel	p	1	p	0.95	88455268	110561434	0.267278	0.506841	0.250163	0.000361767	3.44157	0.0212754	1.67212	0.418304	262
10	q24.2	ZFYVE27	NM_144588	99496877	99520664	0.387184	0.386926	BLCA	10q	del	tel	p	1	p	0.95	88455268	110561434	0.267278	0.506841	0.250163	0.000361767	3.44157	0.0212754	1.67212	0.418304	262
10	q24.2	SFRP5	NM_003015	99526507	99531756	0.386863	0.386806	BLCA	10q	del	tel	p	1	p	0.95	88455268	110561434	0.267278	0.506841	0.250163	0.000361767	3.44157	0.0212754	1.67212	0.418304	262
10	q24.2	LINC00866	NR_108035	99588234	99609555	0.386194	0.385963	BLCA	10q	del	tel	p	1	p	0.95	88455268	110561434	0.267278	0.506841	0.250163	0.000361767	3.44157	0.0212754	1.67212	0.418304	262
10	q24.2	GOLGA7B	NM_001010917	99609994	99631335	0.385958	0.385727	BLCA	10q	del	tel	p	1	p	0.95	88455268	110561434	0.267278	0.506841	0.250163	0.000361767	3.44157	0.0212754	1.67212	0.418304	262
10	q24.2	CRTAC1	NM_018058	99624756	99790585	0.385798	0.384001	BLCA	10q	del	tel	p	1	p	0.95	88455268	110561434	0.267278	0.506841	0.250163	0.000361767	3.44157	0.0212754	1.67212	0.418304	262
10	q24.2	R3HCC1L	NM_138469	99894380	100004654	0.382876	0.381681	BLCA	10q	del	tel	p	1	p	0.95	88455268	110561434	0.267278	0.506841	0.250163	0.000361767	3.44157	0.0212754	1.67212	0.418304	262
10	q24.2	LOXL4	NM_032211	100007442	100028007	0.381651	0.381428	BLCA	10q	del	tel	p	1	p	0.95	88455268	110561434	0.267278	0.506841	0.250163	0.000361767	3.44157	0.0212754	1.67212	0.418304	262
10	q24.2	PYROXD2	NM_032709	100143321	100174978	0.380178	0.379835	BLCA	10q	del	tel	p	1	p	0.95	88455268	110561434	0.267278	0.506841	0.250163	0.000361767	3.44157	0.0212754	1.67212	0.418304	262
10	q24.2	MIR1287	NR_031619	100154974	100155064	0.380052	0.380051	BLCA	10q	del	tel	p	1	p	0.95	88455268	110561434	0.267278	0.506841	0.250163	0.000361767	3.44157	0.0212754	1.67212	0.418304	262
10	q24.2	HPS1	NM_001311345	100175954	100206720	0.379825	0.379491	BLCA	10q	del	tel	p	1	p	0.95	88455268	110561434	0.267278	0.506841	0.250163	0.000361767	3.44157	0.0212754	1.67212	0.418304	262
10	q24.2	MIR4685	NR_039833	100191048	100191117	0.379661	0.37966	BLCA	10q	del	tel	p	1	p	0.95	88455268	110561434	0.267278	0.506841	0.250163	0.000361767	3.44157	0.0212754	1.67212	0.418304	262
10	q24.2	LOC101927278	NR_134451	100206077	100213562	0.379498	0.379417	BLCA	10q	del	tel	p	1	p	0.95	88455268	110561434	0.267278	0.506841	0.250163	0.000361767	3.44157	0.0212754	1.67212	0.418304	262
10	q24.2	HPSE2	NM_001166245	100216833	100995632	0.379382	0.370942	BLCA	10q	del	tel	p	1	p	0.95	88455268	110561434	0.267278	0.506841	0.250163	0.000361767	3.44157	0.0212754	1.67212	0.418304	262
10	q24.2	MIR6507	NR_106762	100684255	100684325	0.374316	0.374316	BLCA	10q	del	tel	p	1	p	0.95	88455268	110561434	0.267278	0.506841	0.250163	0.000361767	3.44157	0.0212754	1.67212	0.418304	262
10	q24.2	CNNM1	NM_001345889	101088855	101154087	0.369932	0.369225	BLCA	10q	del	tel	p	1	p	0.95	88455268	110561434	0.267278	0.506841	0.250163	0.000361767	3.44157	0.0212754	1.67212	0.418304	262
10	q24.2	GOT1	NM_002079	101156626	101190530	0.369197	0.36883	BLCA	10q	del	tel	p	1	p	0.95	88455268	110561434	0.267278	0.506841	0.250163	0.000361767	3.44157	0.0212754	1.67212	0.418304	262
10	q24.2	LINC01475	NR_120618	101286106	101290934	0.367794	0.367742	BLCA	10q	del	tel	p	1	p	0.95	88455268	110561434	0.267278	0.506841	0.250163	0.000361767	3.44157	0.0212754	1.67212	0.418304	262
10	q24.2	NKX2-3	NM_145285	101292689	101296280	0.367723	0.367684	BLCA	10q	del	tel	p	1	p	0.95	88455268	110561434	0.267278	0.506841	0.250163	0.000361767	3.44157	0.0212754	1.67212	0.418304	262
10	q24.2	SLC25A28	NM_031212	101370274	101380221	0.366882	0.366774	BLCA	10q	del	tel	p	1	p	0.95	88455268	110561434	0.267278	0.506841	0.250163	0.000361767	3.44157	0.0212754	1.67212	0.418304	262
10	q24.2	ENTPD7	NM_001349962	101419133	101471002	0.366353	0.36579	BLCA	10q	del	tel	p	1	p	0.95	88455268	110561434	0.267278	0.506841	0.250163	0.000361767	3.44157	0.0212754	1.67212	0.418304	262
10	q24.2	COX15	NM_001320974	101454549	101492423	0.365969	0.365558	BLCA	10q	del	tel	p	1	p	0.95	88455268	110561434	0.267278	0.506841	0.250163	0.000361767	3.44157	0.0212754	1.67212	0.418304	262
10	q24.2	CUTC	NM_015960	101491957	101515894	0.365563	0.365304	BLCA	10q	del	tel	p	1	p	0.95	88455268	110561434	0.267278	0.506841	0.250163	0.000361767	3.44157	0.0212754	1.67212	0.418304	262
10	q24.2	ABCC2	NM_000392	101542354	101611949	0.365017	0.364263	BLCA	10q	del	tel	p	1	p	0.95	88455268	110561434	0.267278	0.506841	0.250163	0.000361767	3.44157	0.0212754	1.67212	0.418304	262
10	q24.2	DNMBP	NM_015221	101635327	101769710	0.36401	0.362553	BLCA	10q	del	tel	p	1	p	0.95	88455268	110561434	0.267278	0.506841	0.250163	0.000361767	3.44157	0.0212754	1.67212	0.418304	262
10	q24.2	DNMBP-AS1	NR_024130	101686961	101718755	0.36345	0.363106	BLCA	10q	del	tel	p	1	p	0.95	88455268	110561434	0.267278	0.506841	0.250163	0.000361767	3.44157	0.0212754	1.67212	0.418304	262
10	q24.2	CPN1	NM_001308	101802064	101841642	0.362203	0.361774	BLCA	10q	del	tel	p	1	p	0.95	88455268	110561434	0.267278	0.506841	0.250163	0.000361767	3.44157	0.0212754	1.67212	0.418304	262
10	q24.31	ERLIN1	NR_144756	101909846	101945814	0.361035	0.360645	BLCA	10q	del	tel	p	1	p	0.95	88455268	110561434	0.267278	0.506841	0.250163	0.000361767	3.44157	0.0212754	1.67212	0.418304	262
10	q24.31	CHUK	NM_001278	101948054	101989367	0.360621	0.360173	BLCA	10q	del	tel	p	1	p	0.95	88455268	110561434	0.267278	0.506841	0.250163	0.000361767	3.44157	0.0212754	1.67212	0.418304	262
10	q24.31	CWF19L1	NM_018294	101992052	102027438	0.360144	0.35976	BLCA	10q	del	tel	p	1	p	0.95	88455268	110561434	0.267278	0.506841	0.250163	0.000361767	3.44157	0.0212754	1.67212	0.418304	262
10	q24.31	SNORA12	NR_002954	101996912	101997059	0.360091	0.36009	BLCA	10q	del	tel	p	1	p	0.95	88455268	110561434	0.267278	0.506841	0.250163	0.000361767	3.44157	0.0212754	1.67212	0.418304	262
10	q24.31	BLOC1S2	NM_173809	102033034	102046469	0.3597	0.359554	BLCA	10q	del	tel	p	1	p	0.95	88455268	110561434	0.267278	0.506841	0.250163	0.000361767	3.44157	0.0212754	1.67212	0.418304	262
10	q24.31	PKD2L1	NM_001253837	102047902	102090243	0.359539	0.35908	BLCA	10q	del	tel	p	1	p	0.95	88455268	110561434	0.267278	0.506841	0.250163	0.000361767	3.44157	0.0212754	1.67212	0.418304	262
10	q24.31	SCD	NM_005063	102106771	102124588	0.358901	0.358708	BLCA	10q	del	tel	p	1	p	0.95	88455268	110561434	0.267278	0.506841	0.250163	0.000361767	3.44157	0.0212754	1.67212	0.418304	262
10	q24.31	OLMALINC	NR_026762	102133332	102148111	0.358613	0.358453	BLCA	10q	del	tel	p	1	p	0.95	88455268	110561434	0.267278	0.506841	0.250163	0.000361767	3.44157	0.0212754	1.67212	0.418304	262
10	q24.31	WNT8B	NM_003393	102222811	102243399	0.357643	0.35742	BLCA	10q	del	tel	p	1	p	0.95	88455268	110561434	0.267278	0.506841	0.250163	0.000361767	3.44157	0.0212754	1.67212	0.418304	262
10	q24.31	SEC31B	NM_015490	102246402	102279595	0.357387	0.357028	BLCA	10q	del	tel	p	1	p	0.95	88455268	110561434	0.267278	0.506841	0.250163	0.000361767	3.44157	0.0212754	1.67212	0.418304	262
10	q24.31	NDUFB8	NM_001284368	102283485	102289680	0.356986	0.356918	BLCA	10q	del	tel	p	1	p	0.95	88455268	110561434	0.267278	0.506841	0.250163	0.000361767	3.44157	0.0212754	1.67212	0.418304	262
10	q24.31	HIF1AN	NM_017902	102295640	102313681	0.356854	0.356658	BLCA	10q	del	tel	p	1	p	0.95	88455268	110561434	0.267278	0.506841	0.250163	0.000361767	3.44157	0.0212754	1.67212	0.418304	262
10	q24.31	PAX2	NM_001304569	102495465	102589698	0.354688	0.353667	BLCA	10q	del	tel	p	1	p	0.95	88455268	110561434	0.267278	0.506841	0.250163	0.000361767	3.44157	0.0212754	1.67212	0.418304	262
10	q24.31	SLF2	NM_018121	102672325	102724891	0.352772	0.352202	BLCA	10q	del	tel	p	1	p	0.95	88455268	110561434	0.267278	0.506841	0.250163	0.000361767	3.44157	0.0212754	1.67212	0.418304	262
10	q24.31	SEMA4G	NM_017893	102732285	102745373	0.352122	0.35198	BLCA	10q	del	tel	p	1	p	0.95	88455268	110561434	0.267278	0.506841	0.250163	0.000361767	3.44157	0.0212754	1.67212	0.418304	262
10	q24.31	MIR608	NR_030339	102734741	102734841	0.352095	0.352094	BLCA	10q	del	tel	p	1	p	0.95	88455268	110561434	0.267278	0.506841	0.250163	0.000361767	3.44157	0.0212754	1.67212	0.418304	262
10	q24.31	MRPL43	NM_176792	102737578	102747272	0.352065	0.35196	BLCA	10q	del	tel	p	1	p	0.95	88455268	110561434	0.267278	0.506841	0.250163	0.000361767	3.44157	0.0212754	1.67212	0.418304	262
10	q24.31	TWNK	NM_021830	102747292	102754158	0.351959	0.351885	BLCA	10q	del	tel	p	1	p	0.95	88455268	110561434	0.267278	0.506841	0.250163	0.000361767	3.44157	0.0212754	1.67212	0.418304	262
10	q24.31	LZTS2	NM_032429	102756822	102767593	0.351856	0.351739	BLCA	10q	del	tel	p	1	p	0.95	88455268	110561434	0.267278	0.506841	0.250163	0.000361767	3.44157	0.0212754	1.67212	0.418304	262
10	q24.31	PDZD7	NM_001195263	102767439	102790914	0.351741	0.351487	BLCA	10q	del	tel	p	1	p	0.95	88455268	110561434	0.267278	0.506841	0.250163	0.000361767	3.44157	0.0212754	1.67212	0.418304	262
10	q24.31	SFXN3	NM_030971	102790995	102800998	0.351486	0.351377	BLCA	10q	del	tel	p	1	p	0.95	88455268	110561434	0.267278	0.506841	0.250163	0.000361767	3.44157	0.0212754	1.67212	0.418304	262
10	q24.31	KAZALD1	NR_135067	102820998	102827898	0.351161	0.351086	BLCA	10q	del	tel	p	1	p	0.95	88455268	110561434	0.267278	0.506841	0.250163	0.000361767	3.44157	0.0212754	1.67212	0.418304	262
10	q24.31	TLX1NB	NR_130722	102849077	102890903	0.350856	0.350403	BLCA	10q	del	tel	p	1	p	0.95	88455268	110561434	0.267278	0.506841	0.250163	0.000361767	3.44157	0.0212754	1.67212	0.418304	262
10	q24.31	TLX1	NM_001195517	102891060	102897546	0.350401	0.350331	BLCA	10q	del	tel	p	1	p	0.95	88455268	110561434	0.267278	0.506841	0.250163	0.000361767	3.44157	0.0212754	1.67212	0.418304	262
10	q24.31	LINC01514	NR_120620	102936078	102953904	0.349913	0.34972	BLCA	10q	del	tel	p	1	p	0.95	88455268	110561434	0.267278	0.506841	0.250163	0.000361767	3.44157	0.0212754	1.67212	0.418304	262
10	q24.31	LBX1	NM_006562	102986732	102988717	0.349365	0.349343	BLCA	10q	del	tel	p	1	p	0.95	88455268	110561434	0.267278	0.506841	0.250163	0.000361767	3.44157	0.0212754	1.67212	0.418304	262
10	q24.31	LBX1-AS1	NR_029380	102989350	102998616	0.349336	0.349236	BLCA	10q	del	tel	p	1	p	0.95	88455268	110561434	0.267278	0.506841	0.250163	0.000361767	3.44157	0.0212754	1.67212	0.418304	262
10	q24.32	LOC101927419	NR_120621	103012577	103023307	0.349084	0.348968	BLCA	10q	del	tel	p	1	p	0.95	88455268	110561434	0.267278	0.506841	0.250163	0.000361767	3.44157	0.0212754	1.67212	0.418304	262
10	q24.32	BTRC	NM_033637	103113789	103317078	0.347988	0.345785	BLCA	10q	del	tel	p	1	p	0.95	88455268	110561434	0.267278	0.506841	0.250163	0.000361767	3.44157	0.0212754	1.67212	0.418304	262
10	q24.32	POLL	NR_033406	103338638	103348027	0.345551	0.345449	BLCA	10q	del	tel	p	1	p	0.95	88455268	110561434	0.267278	0.506841	0.250163	0.000361767	3.44157	0.0212754	1.67212	0.418304	262
10	q24.32	DPCD	NM_001329743	103348044	103369421	0.345449	0.345217	BLCA	10q	del	tel	p	1	p	0.95	88455268	110561434	0.267278	0.506841	0.250163	0.000361767	3.44157	0.0212754	1.67212	0.418304	262
10	q24.32	MIR3158-1	NR_036114	103361173	103361254	0.345307	0.345306	BLCA	10q	del	tel	p	1	p	0.95	88455268	110561434	0.267278	0.506841	0.250163	0.000361767	3.44157	0.0212754	1.67212	0.418304	262
10	q24.32	MIR3158-2	NR_036115	103361173	103361254	0.345307	0.345306	BLCA	10q	del	tel	p	1	p	0.95	88455268	110561434	0.267278	0.506841	0.250163	0.000361767	3.44157	0.0212754	1.67212	0.418304	262
10	q24.32	FBXW4	NM_001323541	103370420	103455052	0.345207	0.344289	BLCA	10q	del	tel	p	1	p	0.95	88455268	110561434	0.267278	0.506841	0.250163	0.000361767	3.44157	0.0212754	1.67212	0.418304	262
10	q24.32	FGF8	NM_001206389	103529886	103540126	0.343478	0.343367	BLCA	10q	del	tel	p	1	p	0.95	88455268	110561434	0.267278	0.506841	0.250163	0.000361767	3.44157	0.0212754	1.67212	0.418304	262
10	q24.32	NPM3	NM_006993	103541081	103543170	0.343357	0.343334	BLCA	10q	del	tel	p	1	p	0.95	88455268	110561434	0.267278	0.506841	0.250163	0.000361767	3.44157	0.0212754	1.67212	0.418304	262
10	q24.32	MGEA5	NM_012215	103544199	103578222	0.343323	0.342955	BLCA	10q	del	tel	p	1	p	0.95	88455268	110561434	0.267278	0.506841	0.250163	0.000361767	3.44157	0.0212754	1.67212	0.418304	262
10	q24.32	KCNIP2-AS1	NR_045118	103578824	103588646	0.342948	0.342842	BLCA	10q	del	tel	p	1	p	0.95	88455268	110561434	0.267278	0.506841	0.250163	0.000361767	3.44157	0.0212754	1.67212	0.418304	262
10	q24.32	KCNIP2	NM_173192	103585730	103603677	0.342873	0.342679	BLCA	10q	del	tel	p	1	p	0.95	88455268	110561434	0.267278	0.506841	0.250163	0.000361767	3.44157	0.0212754	1.67212	0.418304	262
10	q24.32	C10orf76	NM_024541	103605355	103815932	0.342661	0.340379	BLCA	10q	del	tel	p	1	p	0.95	88455268	110561434	0.267278	0.506841	0.250163	0.000361767	3.44157	0.0212754	1.67212	0.418304	262
10	q24.32	HPS6	NM_024747	103825123	103827795	0.340279	0.34025	BLCA	10q	del	tel	p	1	p	0.95	88455268	110561434	0.267278	0.506841	0.250163	0.000361767	3.44157	0.0212754	1.67212	0.418304	262
10	q24.32	LDB1	NM_001321612	103866248	103880230	0.339833	0.339682	BLCA	10q	del	tel	p	1	p	0.95	88455268	110561434	0.267278	0.506841	0.250163	0.000361767	3.44157	0.0212754	1.67212	0.418304	262
10	q24.32	PPRC1	NM_001288727	103892750	103910090	0.339546	0.339358	BLCA	10q	del	tel	p	1	p	0.95	88455268	110561434	0.267278	0.506841	0.250163	0.000361767	3.44157	0.0212754	1.67212	0.418304	262
10	q24.32	NOLC1	NM_004741	103911932	103923628	0.339338	0.339211	BLCA	10q	del	tel	p	1	p	0.95	88455268	110561434	0.267278	0.506841	0.250163	0.000361767	3.44157	0.0212754	1.67212	0.418304	262
10	q24.32	ELOVL3	NM_152310	103986034	103989344	0.338535	0.338499	BLCA	10q	del	tel	p	1	p	0.95	88455268	110561434	0.267278	0.506841	0.250163	0.000361767	3.44157	0.0212754	1.67212	0.418304	262
10	q24.32	PITX3	NM_005029	103989945	104001231	0.338493	0.338371	BLCA	10q	del	tel	p	1	p	0.95	88455268	110561434	0.267278	0.506841	0.250163	0.000361767	3.44157	0.0212754	1.67212	0.418304	262
10	q24.32	GBF1	NM_004193	104005254	104142656	0.338327	0.336838	BLCA	10q	del	tel	p	1	p	0.95	88455268	110561434	0.267278	0.506841	0.250163	0.000361767	3.44157	0.0212754	1.67212	0.418304	262
10	q24.32	NFKB2	NM_001288724	104153866	104162286	0.336716	0.336625	BLCA	10q	del	tel	p	1	p	0.95	88455268	110561434	0.267278	0.506841	0.250163	0.000361767	3.44157	0.0212754	1.67212	0.418304	262
10	q24.32	PSD	NM_001270965	104162373	104179691	0.336624	0.336437	BLCA	10q	del	tel	p	1	p	0.95	88455268	110561434	0.267278	0.506841	0.250163	0.000361767	3.44157	0.0212754	1.67212	0.418304	262
10	q24.32	FBXL15	NM_024326	104179570	104182893	0.336438	0.336402	BLCA	10q	del	tel	p	1	p	0.95	88455268	110561434	0.267278	0.506841	0.250163	0.000361767	3.44157	0.0212754	1.67212	0.418304	262
10	q24.32	CUEDC2	NM_024040	104183001	104192423	0.336401	0.336299	BLCA	10q	del	tel	p	1	p	0.95	88455268	110561434	0.267278	0.506841	0.250163	0.000361767	3.44157	0.0212754	1.67212	0.418304	262
10	q24.32	MIR146B	NR_030169	104196268	104196341	0.336257	0.336256	BLCA	10q	del	tel	p	1	p	0.95	88455268	110561434	0.267278	0.506841	0.250163	0.000361767	3.44157	0.0212754	1.67212	0.418304	262
10	q24.32	RPARP-AS1	NR_038937	104209573	104216050	0.336113	0.336043	BLCA	10q	del	tel	p	1	p	0.95	88455268	110561434	0.267278	0.506841	0.250163	0.000361767	3.44157	0.0212754	1.67212	0.418304	262
10	q24.32	C10orf95	NM_024886	104209593	104211300	0.336113	0.336094	BLCA	10q	del	tel	p	1	p	0.95	88455268	110561434	0.267278	0.506841	0.250163	0.000361767	3.44157	0.0212754	1.67212	0.418304	262
10	q24.32	MFSD13A	NM_024789	104221169	104236802	0.335987	0.335818	BLCA	10q	del	tel	p	1	p	0.95	88455268	110561434	0.267278	0.506841	0.250163	0.000361767	3.44157	0.0212754	1.67212	0.418304	262
10	q24.32	ACTR1A	NM_005736	104238985	104262512	0.335794	0.335539	BLCA	10q	del	tel	p	1	p	0.95	88455268	110561434	0.267278	0.506841	0.250163	0.000361767	3.44157	0.0212754	1.67212	0.418304	262
10	q24.32	SUFU	NM_016169	104263718	104393214	0.335526	0.334123	BLCA	10q	del	tel	p	1	p	0.95	88455268	110561434	0.267278	0.506841	0.250163	0.000361767	3.44157	0.0212754	1.67212	0.418304	262
10	q24.32	TRIM8	NM_001345950	104404251	104418076	0.334003	0.333853	BLCA	10q	del	tel	p	1	p	0.95	88455268	110561434	0.267278	0.506841	0.250163	0.000361767	3.44157	0.0212754	1.67212	0.418304	262
10	q24.32	ARL3	NM_004311	104433483	104474190	0.333686	0.333245	BLCA	10q	del	tel	p	1	p	0.95	88455268	110561434	0.267278	0.506841	0.250163	0.000361767	3.44157	0.0212754	1.67212	0.418304	262
10	q24.32	SFXN2	NR_146992	104474274	104498947	0.333244	0.332977	BLCA	10q	del	tel	p	1	p	0.95	88455268	110561434	0.267278	0.506841	0.250163	0.000361767	3.44157	0.0212754	1.67212	0.418304	262
10	q24.32	WBP1L	NM_001083913	104503726	104576021	0.332925	0.332142	BLCA	10q	del	tel	p	1	p	0.95	88455268	110561434	0.267278	0.506841	0.250163	0.000361767	3.44157	0.0212754	1.67212	0.418304	262
10	q24.32	CYP17A1	NM_000102	104590287	104597290	0.331987	0.331911	BLCA	10q	del	tel	p	1	p	0.95	88455268	110561434	0.267278	0.506841	0.250163	0.000361767	3.44157	0.0212754	1.67212	0.418304	262
10	q24.32	BORCS7	NM_144591	104613966	104624718	0.33173	0.331614	BLCA	10q	del	tel	p	1	p	0.95	88455268	110561434	0.267278	0.506841	0.250163	0.000361767	3.44157	0.0212754	1.67212	0.418304	262
10	q24.32	BORCS7-ASMT	NR_037644	104613966	104661655	0.33173	0.331214	BLCA	10q	del	tel	p	1	p	0.95	88455268	110561434	0.267278	0.506841	0.250163	0.000361767	3.44157	0.0212754	1.67212	0.418304	262
10	q24.32	AS3MT	NM_020682	104629209	104661655	0.331565	0.331214	BLCA	10q	del	tel	p	1	p	0.95	88455268	110561434	0.267278	0.506841	0.250163	0.000361767	3.44157	0.0212754	1.67212	0.418304	262
10	q24.32	CNNM2	NM_199076	104678074	104838344	0.331036	0.329299	BLCA	10q	del	tel	p	1	p	0.95	88455268	110561434	0.267278	0.506841	0.250163	0.000361767	3.44157	0.0212754	1.67212	0.418304	262
10	q24.33	NT5C2	NM_001351194	104847773	104953063	0.329197	0.328056	BLCA	10q	del	tel	p	1	p	0.95	88455268	110561434	0.267278	0.506841	0.250163	0.000361767	3.44157	0.0212754	1.67212	0.418304	262
10	q24.33	RPEL1	NM_001143909	105005643	105007773	0.327486	0.327463	BLCA	10q	del	tel	p	1	p	0.95	88455268	110561434	0.267278	0.506841	0.250163	0.000361767	3.44157	0.0212754	1.67212	0.418304	262
10	q24.33	INA	NM_032727	105036919	105050108	0.327147	0.327004	BLCA	10q	del	tel	p	1	p	0.95	88455268	110561434	0.267278	0.506841	0.250163	0.000361767	3.44157	0.0212754	1.67212	0.418304	262
10	q24.33	PCGF6	NM_032154	105062552	105110891	0.326869	0.326345	BLCA	10q	del	tel	p	1	p	0.95	88455268	110561434	0.267278	0.506841	0.250163	0.000361767	3.44157	0.0212754	1.67212	0.418304	262
10	q24.33	TAF5	NM_006951	105127709	105148822	0.326163	0.325934	BLCA	10q	del	tel	p	1	p	0.95	88455268	110561434	0.267278	0.506841	0.250163	0.000361767	3.44157	0.0212754	1.67212	0.418304	262
10	q24.33	ATP5MD	NM_001206427	105148808	105156270	0.325934	0.325853	BLCA	10q	del	tel	p	1	p	0.95	88455268	110561434	0.267278	0.506841	0.250163	0.000361767	3.44157	0.0212754	1.67212	0.418304	262
10	q24.33	MIR1307	NR_031707	105154009	105154158	0.325878	0.325876	BLCA	10q	del	tel	p	1	p	0.95	88455268	110561434	0.267278	0.506841	0.250163	0.000361767	3.44157	0.0212754	1.67212	0.418304	262
10	q24.33	PDCD11	NM_014976	105156411	105206019	0.325852	0.325314	BLCA	10q	del	tel	p	1	p	0.95	88455268	110561434	0.267278	0.506841	0.250163	0.000361767	3.44157	0.0212754	1.67212	0.418304	262
10	q24.33	CALHM2	NR_024552	105206542	105212162	0.325309	0.325248	BLCA	10q	del	tel	p	1	p	0.95	88455268	110561434	0.267278	0.506841	0.250163	0.000361767	3.44157	0.0212754	1.67212	0.418304	262
10	q24.33	CALHM1	NM_001001412	105213143	105218648	0.325237	0.325177	BLCA	10q	del	tel	p	1	p	0.95	88455268	110561434	0.267278	0.506841	0.250163	0.000361767	3.44157	0.0212754	1.67212	0.418304	262
10	q24.33	CALHM3	NM_001129742	105232560	105238997	0.325027	0.324957	BLCA	10q	del	tel	p	1	p	0.95	88455268	110561434	0.267278	0.506841	0.250163	0.000361767	3.44157	0.0212754	1.67212	0.418304	262
10	q24.33	NEURL1-AS1	NR_120675	105239359	105277199	0.324953	0.324543	BLCA	10q	del	tel	p	1	p	0.95	88455268	110561434	0.267278	0.506841	0.250163	0.000361767	3.44157	0.0212754	1.67212	0.418304	262
10	q24.33	NEURL1	NM_004210	105253734	105352309	0.324797	0.323729	BLCA	10q	del	tel	p	1	p	0.95	88455268	110561434	0.267278	0.506841	0.250163	0.000361767	3.44157	0.0212754	1.67212	0.418304	262
10	q24.33	SH3PXD2A	NM_014631	105353783	105615164	0.323713	0.32088	BLCA	10q	del	tel	p	1	p	0.95	88455268	110561434	0.267278	0.506841	0.250163	0.000361767	3.44157	0.0212754	1.67212	0.418304	262
10	q24.33	SH3PXD2A-AS1	NR_038940	105506536	105515167	0.322058	0.321964	BLCA	10q	del	tel	p	1	p	0.95	88455268	110561434	0.267278	0.506841	0.250163	0.000361767	3.44157	0.0212754	1.67212	0.418304	262
10	q24.33	STN1	NM_024928	105637317	105678045	0.32064	0.320199	BLCA	10q	del	tel	p	1	p	0.95	88455268	110561434	0.267278	0.506841	0.250163	0.000361767	3.44157	0.0212754	1.67212	0.418304	262
10	q24.33	SLK	NM_014720	105726942	105788991	0.319669	0.318997	BLCA	10q	del	tel	p	1	p	0.95	88455268	110561434	0.267278	0.506841	0.250163	0.000361767	3.44157	0.0212754	1.67212	0.418304	262
10	q25.1	COL17A1	NM_000494	105791045	105845638	0.318974	0.318383	BLCA	10q	del	tel	p	1	p	0.95	88455268	110561434	0.267278	0.506841	0.250163	0.000361767	3.44157	0.0212754	1.67212	0.418304	262
10	q25.1	MIR936	NR_030760	105807846	105807944	0.318792	0.318791	BLCA	10q	del	tel	p	1	p	0.95	88455268	110561434	0.267278	0.506841	0.250163	0.000361767	3.44157	0.0212754	1.67212	0.418304	262
10	q25.1	SFR1	NM_145247	105881815	105886143	0.317991	0.317944	BLCA	10q	del	tel	p	1	p	0.95	88455268	110561434	0.267278	0.506841	0.250163	0.000361767	3.44157	0.0212754	1.67212	0.418304	262
10	q25.1	CFAP43	NM_025145	105889645	105992135	0.317906	0.316795	BLCA	10q	del	tel	p	1	p	0.95	88455268	110561434	0.267278	0.506841	0.250163	0.000361767	3.44157	0.0212754	1.67212	0.418304	262
10	q25.1	MIR609	NR_030340	105978546	105978641	0.316943	0.316941	BLCA	10q	del	tel	p	1	p	0.95	88455268	110561434	0.267278	0.506841	0.250163	0.000361767	3.44157	0.0212754	1.67212	0.418304	262
10	q25.1	GSTO1	NM_001191003	106013951	106027222	0.316559	0.316415	BLCA	10q	del	tel	p	1	p	0.95	88455268	110561434	0.267278	0.506841	0.250163	0.000361767	3.44157	0.0212754	1.67212	0.418304	262
10	q25.1	MIR4482	NR_039702	106028093	106028163	0.316406	0.316405	BLCA	10q	del	tel	p	1	p	0.95	88455268	110561434	0.267278	0.506841	0.250163	0.000361767	3.44157	0.0212754	1.67212	0.418304	262
10	q25.1	GSTO2	NM_001191013	106028630	106059176	0.3164	0.316069	BLCA	10q	del	tel	p	1	p	0.95	88455268	110561434	0.267278	0.506841	0.250163	0.000361767	3.44157	0.0212754	1.67212	0.418304	262
10	q25.1	ITPRIP	NM_001272013	106069453	106098251	0.315957	0.315645	BLCA	10q	del	tel	p	1	p	0.95	88455268	110561434	0.267278	0.506841	0.250163	0.000361767	3.44157	0.0212754	1.67212	0.418304	262
10	q25.1	LOC101927472	NR_120622	106083121	106086503	0.315809	0.315773	BLCA	10q	del	tel	p	1	p	0.95	88455268	110561434	0.267278	0.506841	0.250163	0.000361767	3.44157	0.0212754	1.67212	0.418304	262
10	q25.1	CFAP58-AS1	NR_108036	106111058	106113333	0.315506	0.315482	BLCA	10q	del	tel	p	1	p	0.95	88455268	110561434	0.267278	0.506841	0.250163	0.000361767	3.44157	0.0212754	1.67212	0.418304	262
10	q25.1	CFAP58	NM_001008723	106113521	106214848	0.31548	0.314382	BLCA	10q	del	tel	p	1	p	0.95	88455268	110561434	0.267278	0.506841	0.250163	0.000361767	3.44157	0.0212754	1.67212	0.418304	262
10	q25.1	LOC101927523	NR_120624	106234697	106240033	0.314167	0.314109	BLCA	10q	del	tel	p	1	p	0.95	88455268	110561434	0.267278	0.506841	0.250163	0.000361767	3.44157	0.0212754	1.67212	0.418304	262
10	q25.1	SORCS3	NM_014978	106400858	107025000	0.312366	0.305602	BLCA	10q	del	tel	p	1	p	0.95	88455268	110561434	0.267278	0.506841	0.250163	0.000361767	3.44157	0.0212754	1.67212	0.418304	262
10	q25.1	SORCS3-AS1	NR_104028	106424365	106425974	0.312111	0.312094	BLCA	10q	del	tel	p	1	p	0.95	88455268	110561434	0.267278	0.506841	0.250163	0.000361767	3.44157	0.0212754	1.67212	0.418304	262
10	q25.1	LOC101927549	NR_120625	107433367	107580091	0.301177	0.299587	BLCA	10q	del	tel	p	1	p	0.95	88455268	110561434	0.267278	0.506841	0.250163	0.000361767	3.44157	0.0212754	1.67212	0.418304	262
10	q25.1	LOC105378470	NR_134330	107899922	107948480	0.296121	0.295594	BLCA	10q	del	tel	p	1	p	0.95	88455268	110561434	0.267278	0.506841	0.250163	0.000361767	3.44157	0.0212754	1.67212	0.418304	262
10	q25.1	SORCS1	NM_001206570	108333420	108924466	0.291423	0.285018	BLCA	10q	del	tel	p	1	p	0.95	88455268	110561434	0.267278	0.506841	0.250163	0.000361767	3.44157	0.0212754	1.67212	0.418304	262
10	q25.1	LINC01435	NR_125760	109631334	109829051	0.277358	0.275215	BLCA	10q	del	tel	p	1	p	0.95	88455268	110561434	0.267278	0.506841	0.250163	0.000361767	3.44157	0.0212754	1.67212	0.418304	262
11	p14.1	MIR8068	NR_107035	28499027	28499095	0.56539	0.565392	BLCA	11p	del	tel	p	1	p	0.95	28387772	33957705	0.563147	0.675446	0.230128	0.000585583	3.23241	0.0321285	1.49311	0.343606	35
11	p14.1	LINC02546	NR_149107	29615959	29652221	0.587909	0.58864	BLCA	11p	del	tel	p	1	p	0.95	28387772	33957705	0.563147	0.675446	0.230128	0.000585583	3.23241	0.0321285	1.49311	0.343606	35
11	p14.1	LINC01616	NR_132652	30001667	30003940	0.595686	0.595732	BLCA	11p	del	tel	p	1	p	0.95	28387772	33957705	0.563147	0.675446	0.230128	0.000585583	3.23241	0.0321285	1.49311	0.343606	35
11	p14.1	KCNA4	NM_002233	30031287	30038577	0.596283	0.59643	BLCA	11p	del	tel	p	1	p	0.95	28387772	33957705	0.563147	0.675446	0.230128	0.000585583	3.23241	0.0321285	1.49311	0.343606	35
11	p14.1	FSHB	NM_001018080	30252562	30256824	0.600744	0.60083	BLCA	11p	del	tel	p	1	p	0.95	28387772	33957705	0.563147	0.675446	0.230128	0.000585583	3.23241	0.0321285	1.49311	0.343606	35
11	p14.1	ARL14EP	NM_152316	30344645	30359770	0.602601	0.602906	BLCA	11p	del	tel	p	1	p	0.95	28387772	33957705	0.563147	0.675446	0.230128	0.000585583	3.23241	0.0321285	1.49311	0.343606	35
11	p14.1	MPPED2	NM_001145399	30406039	30607930	0.603839	0.607909	BLCA	11p	del	tel	p	1	p	0.95	28387772	33957705	0.563147	0.675446	0.230128	0.000585583	3.23241	0.0321285	1.49311	0.343606	35
11	p13	DCDC1	NM_001350255	30886490	31391357	0.613525	0.623704	BLCA	11p	del	tel	p	1	p	0.95	28387772	33957705	0.563147	0.675446	0.230128	0.000585583	3.23241	0.0321285	1.49311	0.343606	35
11	p13	DNAJC24	NM_181706	31391376	31454382	0.623705	0.624975	BLCA	11p	del	tel	p	1	p	0.95	28387772	33957705	0.563147	0.675446	0.230128	0.000585583	3.23241	0.0321285	1.49311	0.343606	35
11	p13	IMMP1L	NM_001304274	31453945	31531175	0.624966	0.626523	BLCA	11p	del	tel	p	1	p	0.95	28387772	33957705	0.563147	0.675446	0.230128	0.000585583	3.23241	0.0321285	1.49311	0.343606	35
11	p13	ELP4	NM_001288726	31531275	31806073	0.626525	0.632066	BLCA	11p	del	tel	p	1	p	0.95	28387772	33957705	0.563147	0.675446	0.230128	0.000585583	3.23241	0.0321285	1.49311	0.343606	35
11	p13	PAX6	NM_001258462	31806339	31839509	0.632071	0.63274	BLCA	11p	del	tel	p	1	p	0.95	28387772	33957705	0.563147	0.675446	0.230128	0.000585583	3.23241	0.0321285	1.49311	0.343606	35
11	p13	PAX6-AS1	NR_033971	31838113	31908587	0.632712	0.634132	BLCA	11p	del	tel	p	1	p	0.95	28387772	33957705	0.563147	0.675446	0.230128	0.000585583	3.23241	0.0321285	1.49311	0.343606	35
11	p13	PAUPAR	NR_117094	31848113	31850850	0.632913	0.632968	BLCA	11p	del	tel	p	1	p	0.95	28387772	33957705	0.563147	0.675446	0.230128	0.000585583	3.23241	0.0321285	1.49311	0.343606	35
11	p13	LOC100506675	NR_120526	32057524	32062864	0.637135	0.637243	BLCA	11p	del	tel	p	1	p	0.95	28387772	33957705	0.563147	0.675446	0.230128	0.000585583	3.23241	0.0321285	1.49311	0.343606	35
11	p13	RCN1	NM_002901	32112476	32127272	0.638243	0.638541	BLCA	11p	del	tel	p	1	p	0.95	28387772	33957705	0.563147	0.675446	0.230128	0.000585583	3.23241	0.0321285	1.49311	0.343606	35
11	p13	SNORA88	NR_132770	32165287	32165458	0.639308	0.639311	BLCA	11p	del	tel	p	1	p	0.95	28387772	33957705	0.563147	0.675446	0.230128	0.000585583	3.23241	0.0321285	1.49311	0.343606	35
11	p13	WT1	NM_000378	32409320	32457085	0.644228	0.645191	BLCA	11p	del	tel	p	1	p	0.95	28387772	33957705	0.563147	0.675446	0.230128	0.000585583	3.23241	0.0321285	1.49311	0.343606	35
11	p13	WT1-AS	NR_120548	32457063	32480315	0.645191	0.645659	BLCA	11p	del	tel	p	1	p	0.95	28387772	33957705	0.563147	0.675446	0.230128	0.000585583	3.23241	0.0321285	1.49311	0.343606	35
11	p13	EIF3M	NM_001307929	32605312	32624419	0.64818	0.648565	BLCA	11p	del	tel	p	1	p	0.95	28387772	33957705	0.563147	0.675446	0.230128	0.000585583	3.23241	0.0321285	1.49311	0.343606	35
11	p13	CCDC73	NM_001008391	32623625	32816204	0.648549	0.652431	BLCA	11p	del	tel	p	1	p	0.95	28387772	33957705	0.563147	0.675446	0.230128	0.000585583	3.23241	0.0321285	1.49311	0.343606	35
11	p13	PRRG4	NM_024081	32851480	32879669	0.653143	0.653711	BLCA	11p	del	tel	p	1	p	0.95	28387772	33957705	0.563147	0.675446	0.230128	0.000585583	3.23241	0.0321285	1.49311	0.343606	35
11	p13	QSER1	NM_001076786	32914723	33001814	0.654418	0.656174	BLCA	11p	del	tel	p	1	p	0.95	28387772	33957705	0.563147	0.675446	0.230128	0.000585583	3.23241	0.0321285	1.49311	0.343606	35
11	p13	DEPDC7	NM_001077242	33037409	33055128	0.656891	0.657249	BLCA	11p	del	tel	p	1	p	0.95	28387772	33957705	0.563147	0.675446	0.230128	0.000585583	3.23241	0.0321285	1.49311	0.343606	35
11	p13	TCP11L1	NM_018393	33060962	33095109	0.657366	0.658055	BLCA	11p	del	tel	p	1	p	0.95	28387772	33957705	0.563147	0.675446	0.230128	0.000585583	3.23241	0.0321285	1.49311	0.343606	35
11	p13	LINC00294	NR_015451	33097695	33101000	0.658107	0.658173	BLCA	11p	del	tel	p	1	p	0.95	28387772	33957705	0.563147	0.675446	0.230128	0.000585583	3.23241	0.0321285	1.49311	0.343606	35
11	p13	CSTF3	NM_001326	33106129	33183037	0.658277	0.659827	BLCA	11p	del	tel	p	1	p	0.95	28387772	33957705	0.563147	0.675446	0.230128	0.000585583	3.23241	0.0321285	1.49311	0.343606	35
11	p13	CSTF3-AS1	NR_034027	33183202	33213142	0.659831	0.660434	BLCA	11p	del	tel	p	1	p	0.95	28387772	33957705	0.563147	0.675446	0.230128	0.000585583	3.23241	0.0321285	1.49311	0.343606	35
11	p13	HIPK3	NM_001278163	33278217	33378568	0.661746	0.66377	BLCA	11p	del	tel	p	1	p	0.95	28387772	33957705	0.563147	0.675446	0.230128	0.000585583	3.23241	0.0321285	1.49311	0.343606	35
11	p13	KIAA1549L	NM_012194	33563876	33695646	0.667506	0.670162	BLCA	11p	del	tel	p	1	p	0.95	28387772	33957705	0.563147	0.675446	0.230128	0.000585583	3.23241	0.0321285	1.49311	0.343606	35
11	p13	C11orf91	NM_001166692	33719653	33722286	0.670646	0.6707	BLCA	11p	del	tel	p	1	p	0.95	28387772	33957705	0.563147	0.675446	0.230128	0.000585583	3.23241	0.0321285	1.49311	0.343606	35
11	p13	CD59	NM_203331	33724555	33758025	0.670745	0.67142	BLCA	11p	del	tel	p	1	p	0.95	28387772	33957705	0.563147	0.675446	0.230128	0.000585583	3.23241	0.0321285	1.49311	0.343606	35
11	p13	FBXO3	NM_012175	33762489	33796071	0.67151	0.672187	BLCA	11p	del	tel	p	1	p	0.95	28387772	33957705	0.563147	0.675446	0.230128	0.000585583	3.23241	0.0321285	1.49311	0.343606	35
11	p13	FBXO3-AS1	NR_120550	33796244	33797216	0.672191	0.67221	BLCA	11p	del	tel	p	1	p	0.95	28387772	33957705	0.563147	0.675446	0.230128	0.000585583	3.23241	0.0321285	1.49311	0.343606	35
11	p13	LMO2	NM_005574	33880122	33913836	0.673882	0.674561	BLCA	11p	del	tel	p	1	p	0.95	28387772	33957705	0.563147	0.675446	0.230128	0.000585583	3.23241	0.0321285	1.49311	0.343606	35
8	p21.1	INTS9	NM_018250	28625174	28747698	0.66187	0.664766	BRCA	8p	del	tel	p	1	p	0.95	28746324	29180515	0.664733	0.674994	0.485592	0	inf	0	16	7.76948	3
8	p12	HMBOX1	NM_001324393	28747886	28910787	0.66477	0.66862	BRCA	8p	del	tel	p	1	p	0.95	28746324	29180515	0.664733	0.674994	0.485592	0	inf	0	16	7.76948	3
8	p12	KIF13B	NM_015254	28924794	29120610	0.668951	0.673578	BRCA	8p	del	tel	p	1	p	0.95	28746324	29180515	0.664733	0.674994	0.485592	0	inf	0	16	7.76948	3
8	q21.3	CPNE3	NM_003909	87526655	87573726	0.590211	0.58973	BRCA	8q	amp	tel	p	1	p	0.95	87566214	94932839	0.514461	0.589806	0.395858	0	inf	0	16	6.33372	35
8	q21.3	CNGB3	NM_019098	87586162	87755903	0.589602	0.587866	BRCA	8q	amp	tel	p	1	p	0.95	87566214	94932839	0.514461	0.589806	0.395858	0	inf	0	16	6.33372	35
8	q21.3	CNBD1	NM_173538	87878675	88394955	0.586611	0.58133	BRCA	8q	amp	tel	p	1	p	0.95	87566214	94932839	0.514461	0.589806	0.395858	0	inf	0	16	6.33372	35
8	q21.3	DCAF4L2	NM_152418	88882970	88886296	0.576339	0.576305	BRCA	8q	amp	tel	p	1	p	0.95	87566214	94932839	0.514461	0.589806	0.395858	0	inf	0	16	6.33372	35
8	q21.3	MMP16	NM_005941	89049459	89339717	0.574636	0.571667	BRCA	8q	amp	tel	p	1	p	0.95	87566214	94932839	0.514461	0.589806	0.395858	0	inf	0	16	6.33372	35
8	q21.3	LOC101929709	NR_125822	90729626	90769939	0.557451	0.557039	BRCA	8q	amp	tel	p	1	p	0.95	87566214	94932839	0.514461	0.589806	0.395858	0	inf	0	16	6.33372	35
8	q21.3	RIPK2	NM_003821	90769974	90803292	0.557039	0.556698	BRCA	8q	amp	tel	p	1	p	0.95	87566214	94932839	0.514461	0.589806	0.395858	0	inf	0	16	6.33372	35
8	q21.3	OSGIN2	NM_004337	90914095	90940095	0.555564	0.555299	BRCA	8q	amp	tel	p	1	p	0.95	87566214	94932839	0.514461	0.589806	0.395858	0	inf	0	16	6.33372	35
8	q21.3	NBN	NM_001024688	90945563	90996952	0.555243	0.554717	BRCA	8q	amp	tel	p	1	p	0.95	87566214	94932839	0.514461	0.589806	0.395858	0	inf	0	16	6.33372	35
8	q21.3	DECR1	NM_001330575	91013579	91065861	0.554547	0.554012	BRCA	8q	amp	tel	p	1	p	0.95	87566214	94932839	0.514461	0.589806	0.395858	0	inf	0	16	6.33372	35
8	q21.3	CALB1	NM_004929	91070835	91095109	0.553961	0.553713	BRCA	8q	amp	tel	p	1	p	0.95	87566214	94932839	0.514461	0.589806	0.395858	0	inf	0	16	6.33372	35
8	q21.3	LINC00534	NR_051989	91233715	91400187	0.552295	0.550593	BRCA	8q	amp	tel	p	1	p	0.95	87566214	94932839	0.514461	0.589806	0.395858	0	inf	0	16	6.33372	35
8	q21.3	LINC01030	NR_104062	91605002	91618291	0.548498	0.548362	BRCA	8q	amp	tel	p	1	p	0.95	87566214	94932839	0.514461	0.589806	0.395858	0	inf	0	16	6.33372	35
8	q21.3	TMEM64	NM_001146273	91634222	91658133	0.548199	0.547955	BRCA	8q	amp	tel	p	1	p	0.95	87566214	94932839	0.514461	0.589806	0.395858	0	inf	0	16	6.33372	35
8	q21.3	NECAB1	NM_022351	91803920	91971630	0.546463	0.544748	BRCA	8q	amp	tel	p	1	p	0.95	87566214	94932839	0.514461	0.589806	0.395858	0	inf	0	16	6.33372	35
8	q21.3	C8orf88	NM_001190972	91970705	91997485	0.544758	0.544484	BRCA	8q	amp	tel	p	1	p	0.95	87566214	94932839	0.514461	0.589806	0.395858	0	inf	0	16	6.33372	35
8	q21.3	PIP4P2	NM_018710	92006501	92053203	0.544391	0.543914	BRCA	8q	amp	tel	p	1	p	0.95	87566214	94932839	0.514461	0.589806	0.395858	0	inf	0	16	6.33372	35
8	q21.3	OTUD6B-AS1	NR_110438	92072133	92082417	0.54372	0.543615	BRCA	8q	amp	tel	p	1	p	0.95	87566214	94932839	0.514461	0.589806	0.395858	0	inf	0	16	6.33372	35
8	q21.3	OTUD6B	NM_001286745	92082423	92099323	0.543615	0.543442	BRCA	8q	amp	tel	p	1	p	0.95	87566214	94932839	0.514461	0.589806	0.395858	0	inf	0	16	6.33372	35
8	q21.3	LRRC69	NM_001354470	92114846	92231482	0.543283	0.54209	BRCA	8q	amp	tel	p	1	p	0.95	87566214	94932839	0.514461	0.589806	0.395858	0	inf	0	16	6.33372	35
8	q21.3	MIR4661	NR_039805	92217712	92217786	0.542231	0.54223	BRCA	8q	amp	tel	p	1	p	0.95	87566214	94932839	0.514461	0.589806	0.395858	0	inf	0	16	6.33372	35
8	q21.3	SLC26A7	NM_001282356	92221721	92410382	0.54219	0.540261	BRCA	8q	amp	tel	p	1	p	0.95	87566214	94932839	0.514461	0.589806	0.395858	0	inf	0	16	6.33372	35
8	q21.3	RUNX1T1	NM_175634	92967194	93115454	0.534566	0.533049	BRCA	8q	amp	tel	p	1	p	0.95	87566214	94932839	0.514461	0.589806	0.395858	0	inf	0	16	6.33372	35
8	q22.1	LOC102724710	NR_125827	93577670	93667722	0.528322	0.527401	BRCA	8q	amp	tel	p	1	p	0.95	87566214	94932839	0.514461	0.589806	0.395858	0	inf	0	16	6.33372	35
8	q22.1	FLJ46284	NR_046114	93725189	93798288	0.526813	0.526065	BRCA	8q	amp	tel	p	1	p	0.95	87566214	94932839	0.514461	0.589806	0.395858	0	inf	0	16	6.33372	35
8	q22.1	TRIQK	NM_001171799	93895757	93978372	0.525068	0.524223	BRCA	8q	amp	tel	p	1	p	0.95	87566214	94932839	0.514461	0.589806	0.395858	0	inf	0	16	6.33372	35
8	q22.1	MIR8084	NR_107051	94041978	94042067	0.523573	0.523572	BRCA	8q	amp	tel	p	1	p	0.95	87566214	94932839	0.514461	0.589806	0.395858	0	inf	0	16	6.33372	35
8	q22.1	C8orf87	NM_001242668	94146323	94179079	0.522505	0.52217	BRCA	8q	amp	tel	p	1	p	0.95	87566214	94932839	0.514461	0.589806	0.395858	0	inf	0	16	6.33372	35
8	q22.1	LINC00535	NR_033858	94358694	94712661	0.520333	0.516713	BRCA	8q	amp	tel	p	1	p	0.95	87566214	94932839	0.514461	0.589806	0.395858	0	inf	0	16	6.33372	35
8	q22.1	FAM92A	NM_001283034	94712734	94741478	0.516712	0.516418	BRCA	8q	amp	tel	p	1	p	0.95	87566214	94932839	0.514461	0.589806	0.395858	0	inf	0	16	6.33372	35
8	q22.1	RBM12B	NM_203390	94743730	94753224	0.516395	0.516298	BRCA	8q	amp	tel	p	1	p	0.95	87566214	94932839	0.514461	0.589806	0.395858	0	inf	0	16	6.33372	35
8	q22.1	RBM12B-AS1	NR_027259	94752338	94753047	0.516307	0.5163	BRCA	8q	amp	tel	p	1	p	0.95	87566214	94932839	0.514461	0.589806	0.395858	0	inf	0	16	6.33372	35
8	q22.1	TMEM67	NR_024522	94767071	94831460	0.516157	0.515498	BRCA	8q	amp	tel	p	1	p	0.95	87566214	94932839	0.514461	0.589806	0.395858	0	inf	0	16	6.33372	35
8	q22.1	MIR378D2	NR_039602	94928249	94928347	0.514508	0.514507	BRCA	8q	amp	tel	p	1	p	0.95	87566214	94932839	0.514461	0.589806	0.395858	0	inf	0	16	6.33372	35
8	q22.1	PDP1	NM_018444	94929082	94938296	0.514499	0.514405	BRCA	8q	amp	tel	p	1	p	0.95	87566214	94932839	0.514461	0.589806	0.395858	0	inf	0	16	6.33372	35
17	p12	LINC02087	NR_110839	15709555	15721056	0.72459	0.725156	BRCA	17p	del	tel	p	1	p	0.95	15695418	16563481	0.723894	0.766617	0.386607	0	inf	0	16	6.18571	18
17	p12	ADORA2B	NM_000676	15848230	15879210	0.731415	0.732939	BRCA	17p	del	tel	p	1	p	0.95	15695418	16563481	0.723894	0.766617	0.386607	0	inf	0	16	6.18571	18
17	p12	ZSWIM7	NM_001042698	15879874	15903006	0.732972	0.734111	BRCA	17p	del	tel	p	1	p	0.95	15695418	16563481	0.723894	0.766617	0.386607	0	inf	0	16	6.18571	18
17	p12	TTC19	NM_017775	15902693	15932723	0.734095	0.735573	BRCA	17p	del	tel	p	1	p	0.95	15695418	16563481	0.723894	0.766617	0.386607	0	inf	0	16	6.18571	18
17	p11.2	NCOR1	NM_006311	15933407	16118874	0.735607	0.744735	BRCA	17p	del	tel	p	1	p	0.95	15695418	16563481	0.723894	0.766617	0.386607	0	inf	0	16	6.18571	18
17	p11.2	SNORD163	NR_145787	16056446	16056510	0.741662	0.741666	BRCA	17p	del	tel	p	1	p	0.95	15695418	16563481	0.723894	0.766617	0.386607	0	inf	0	16	6.18571	18
17	p11.2	PIGL	NM_004278	16120508	16229573	0.744815	0.750183	BRCA	17p	del	tel	p	1	p	0.95	15695418	16563481	0.723894	0.766617	0.386607	0	inf	0	16	6.18571	18
17	p11.2	MIR1288	NR_031698	16185327	16185402	0.748006	0.748009	BRCA	17p	del	tel	p	1	p	0.95	15695418	16563481	0.723894	0.766617	0.386607	0	inf	0	16	6.18571	18
17	p11.2	CENPV	NM_181716	16245847	16256812	0.750984	0.751524	BRCA	17p	del	tel	p	1	p	0.95	15695418	16563481	0.723894	0.766617	0.386607	0	inf	0	16	6.18571	18
17	p11.2	UBB	NM_001281716	16284106	16286059	0.752867	0.752963	BRCA	17p	del	tel	p	1	p	0.95	15695418	16563481	0.723894	0.766617	0.386607	0	inf	0	16	6.18571	18
17	p11.2	TRPV2	NM_016113	16318855	16340317	0.754577	0.755634	BRCA	17p	del	tel	p	1	p	0.95	15695418	16563481	0.723894	0.766617	0.386607	0	inf	0	16	6.18571	18
17	p11.2	LRRC75A-AS1	NR_027176	16342300	16373962	0.755731	0.75729	BRCA	17p	del	tel	p	1	p	0.95	15695418	16563481	0.723894	0.766617	0.386607	0	inf	0	16	6.18571	18
17	p11.2	SNORD49B	NR_003043	16342822	16342870	0.755757	0.755759	BRCA	17p	del	tel	p	1	p	0.95	15695418	16563481	0.723894	0.766617	0.386607	0	inf	0	16	6.18571	18
17	p11.2	SNORD49A	NR_002744	16343349	16343420	0.755783	0.755786	BRCA	17p	del	tel	p	1	p	0.95	15695418	16563481	0.723894	0.766617	0.386607	0	inf	0	16	6.18571	18
17	p11.2	SNORD65	NR_003054	16344539	16344612	0.755842	0.755845	BRCA	17p	del	tel	p	1	p	0.95	15695418	16563481	0.723894	0.766617	0.386607	0	inf	0	16	6.18571	18
17	p11.2	LRRC75A	NM_207387	16345318	16395505	0.75588	0.75835	BRCA	17p	del	tel	p	1	p	0.95	15695418	16563481	0.723894	0.766617	0.386607	0	inf	0	16	6.18571	18
17	p11.2	ZNF287	NM_001346171	16450276	16472526	0.761046	0.762141	BRCA	17p	del	tel	p	1	p	0.95	15695418	16563481	0.723894	0.766617	0.386607	0	inf	0	16	6.18571	18
17	p11.2	ZNF624	NM_020787	16524047	16557167	0.764676	0.766306	BRCA	17p	del	tel	p	1	p	0.95	15695418	16563481	0.723894	0.766617	0.386607	0	inf	0	16	6.18571	18
8	q23.3	TRPS1	NM_014112	116420723	116681255	0.294685	0.29202	BRCA	8q	del	tel	n	1	n	0.95	115453296	119379239	0.264425	0.304579	0.588901	1.84874e-12	11.7331	5.04363e-10	9.29726	5.47516	14
8	q23.3	LINC00536	NR_046215	116962735	117337297	0.289141	0.28531	BRCA	8q	del	tel	n	1	n	0.95	115453296	119379239	0.264425	0.304579	0.588901	1.84874e-12	11.7331	5.04363e-10	9.29726	5.47516	14
8	q24.11	EIF3H	NM_003756	117657054	117768062	0.28204	0.280904	BRCA	8q	del	tel	n	1	n	0.95	115453296	119379239	0.264425	0.304579	0.588901	1.84874e-12	11.7331	5.04363e-10	9.29726	5.47516	14
8	q23.3	LOC105375713	NR_136278	117664338	117666863	0.281965	0.281939	BRCA	8q	del	tel	n	1	n	0.95	115453296	119379239	0.264425	0.304579	0.588901	1.84874e-12	11.7331	5.04363e-10	9.29726	5.47516	14
8	q24.11	UTP23	NM_032334	117778741	117786921	0.280795	0.280711	BRCA	8q	del	tel	n	1	n	0.95	115453296	119379239	0.264425	0.304579	0.588901	1.84874e-12	11.7331	5.04363e-10	9.29726	5.47516	14
8	q24.11	RAD21	NM_006265	117858172	117887105	0.279983	0.279687	BRCA	8q	del	tel	n	1	n	0.95	115453296	119379239	0.264425	0.304579	0.588901	1.84874e-12	11.7331	5.04363e-10	9.29726	5.47516	14
8	q24.11	RAD21-AS1	NR_033886	117886662	117889107	0.279691	0.279666	BRCA	8q	del	tel	n	1	n	0.95	115453296	119379239	0.264425	0.304579	0.588901	1.84874e-12	11.7331	5.04363e-10	9.29726	5.47516	14
8	q24.11	MIR3610	NR_037404	117886966	117887039	0.279688	0.279687	BRCA	8q	del	tel	n	1	n	0.95	115453296	119379239	0.264425	0.304579	0.588901	1.84874e-12	11.7331	5.04363e-10	9.29726	5.47516	14
8	q24.11	AARD	NM_001025357	117950463	117956239	0.279039	0.278979	BRCA	8q	del	tel	n	1	n	0.95	115453296	119379239	0.264425	0.304579	0.588901	1.84874e-12	11.7331	5.04363e-10	9.29726	5.47516	14
8	q24.11	SLC30A8	NM_001172811	117962511	118188953	0.278915	0.276599	BRCA	8q	del	tel	n	1	n	0.95	115453296	119379239	0.264425	0.304579	0.588901	1.84874e-12	11.7331	5.04363e-10	9.29726	5.47516	14
8	q24.11	MED30	NM_080651	118532951	118552501	0.273081	0.272881	BRCA	8q	del	tel	n	1	n	0.95	115453296	119379239	0.264425	0.304579	0.588901	1.84874e-12	11.7331	5.04363e-10	9.29726	5.47516	14
8	q24.11	EXT1	NM_000127	118811601	119124058	0.270231	0.267035	BRCA	8q	del	tel	n	1	n	0.95	115453296	119379239	0.264425	0.304579	0.588901	1.84874e-12	11.7331	5.04363e-10	9.29726	5.47516	14
8	q24.11	SNORD168	NR_145799	118933094	118933152	0.268988	0.268988	BRCA	8q	del	tel	n	1	n	0.95	115453296	119379239	0.264425	0.304579	0.588901	1.84874e-12	11.7331	5.04363e-10	9.29726	5.47516	14
8	q24.12	SAMD12	NR_146234	119144066	119634184	0.26683	0.261818	BRCA	8q	del	tel	n	1	n	0.95	115453296	119379239	0.264425	0.304579	0.588901	1.84874e-12	11.7331	5.04363e-10	9.29726	5.47516	14
1	p36.11	LOC101928728	NR_135804	27018400	27020622	0.202882	0.202901	BRCA	1p	del	tel	p	2	n-lp	0.95	26960556	31901187	0.202389	0.244505	0.375492	1.11022e-16	15.9546	4.65574e-14	13.332	5.00607	79
1	p36.11	ARID1A	NM_006015	27022523	27108601	0.202917	0.203651	BRCA	1p	del	tel	p	2	n-lp	0.95	26960556	31901187	0.202389	0.244505	0.375492	1.11022e-16	15.9546	4.65574e-14	13.332	5.00607	79
1	p36.11	PIGV	NM_017837	27114453	27124894	0.2037	0.203789	BRCA	1p	del	tel	p	2	n-lp	0.95	26960556	31901187	0.202389	0.244505	0.375492	1.11022e-16	15.9546	4.65574e-14	13.332	5.00607	79
1	p36.11	ZDHHC18	NM_032283	27153200	27182211	0.204031	0.204278	BRCA	1p	del	tel	p	2	n-lp	0.95	26960556	31901187	0.202389	0.244505	0.375492	1.11022e-16	15.9546	4.65574e-14	13.332	5.00607	79
1	p36.11	SFN	NM_006142	27189628	27190948	0.204341	0.204353	BRCA	1p	del	tel	p	2	n-lp	0.95	26960556	31901187	0.202389	0.244505	0.375492	1.11022e-16	15.9546	4.65574e-14	13.332	5.00607	79
1	p36.11	GPN2	NM_018066	27205872	27216869	0.20448	0.204573	BRCA	1p	del	tel	p	2	n-lp	0.95	26960556	31901187	0.202389	0.244505	0.375492	1.11022e-16	15.9546	4.65574e-14	13.332	5.00607	79
1	p36.11	GPATCH3	NM_022078	27216978	27226962	0.204574	0.20466	BRCA	1p	del	tel	p	2	n-lp	0.95	26960556	31901187	0.202389	0.244505	0.375492	1.11022e-16	15.9546	4.65574e-14	13.332	5.00607	79
1	p36.11	NR0B2	NM_021969	27237974	27240567	0.204753	0.204775	BRCA	1p	del	tel	p	2	n-lp	0.95	26960556	31901187	0.202389	0.244505	0.375492	1.11022e-16	15.9546	4.65574e-14	13.332	5.00607	79
1	p36.11	NUDC	NM_006600	27248212	27273362	0.204841	0.205055	BRCA	1p	del	tel	p	2	n-lp	0.95	26960556	31901187	0.202389	0.244505	0.375492	1.11022e-16	15.9546	4.65574e-14	13.332	5.00607	79
1	p36.11	KDF1	NM_152365	27276046	27286901	0.205078	0.20517	BRCA	1p	del	tel	p	2	n-lp	0.95	26960556	31901187	0.202389	0.244505	0.375492	1.11022e-16	15.9546	4.65574e-14	13.332	5.00607	79
1	p36.11	TRNP1	NM_001013642	27320194	27327377	0.205454	0.205516	BRCA	1p	del	tel	p	2	n-lp	0.95	26960556	31901187	0.202389	0.244505	0.375492	1.11022e-16	15.9546	4.65574e-14	13.332	5.00607	79
1	p36.11	FAM46B	NM_052943	27331510	27339333	0.205551	0.205617	BRCA	1p	del	tel	p	2	n-lp	0.95	26960556	31901187	0.202389	0.244505	0.375492	1.11022e-16	15.9546	4.65574e-14	13.332	5.00607	79
1	p36.11	SLC9A1	NM_003047	27425299	27481621	0.20635	0.20683	BRCA	1p	del	tel	p	2	n-lp	0.95	26960556	31901187	0.202389	0.244505	0.375492	1.11022e-16	15.9546	4.65574e-14	13.332	5.00607	79
1	p36.11	WDTC1	NM_015023	27561006	27635124	0.207507	0.208139	BRCA	1p	del	tel	p	2	n-lp	0.95	26960556	31901187	0.202389	0.244505	0.375492	1.11022e-16	15.9546	4.65574e-14	13.332	5.00607	79
1	p36.11	TMEM222	NR_037576	27648635	27662891	0.208254	0.208376	BRCA	1p	del	tel	p	2	n-lp	0.95	26960556	31901187	0.202389	0.244505	0.375492	1.11022e-16	15.9546	4.65574e-14	13.332	5.00607	79
1	p36.11	ACTG1P20	NR_033926	27650364	27653016	0.208269	0.208291	BRCA	1p	del	tel	p	2	n-lp	0.95	26960556	31901187	0.202389	0.244505	0.375492	1.11022e-16	15.9546	4.65574e-14	13.332	5.00607	79
1	p36.11	SYTL1	NM_032872	27668482	27680423	0.208423	0.208525	BRCA	1p	del	tel	p	2	n-lp	0.95	26960556	31901187	0.202389	0.244505	0.375492	1.11022e-16	15.9546	4.65574e-14	13.332	5.00607	79
1	p36.11	MAP3K6	NM_004672	27681669	27693357	0.208536	0.208635	BRCA	1p	del	tel	p	2	n-lp	0.95	26960556	31901187	0.202389	0.244505	0.375492	1.11022e-16	15.9546	4.65574e-14	13.332	5.00607	79
1	p36.11	FCN3	NM_003665	27695600	27701343	0.208654	0.208703	BRCA	1p	del	tel	p	2	n-lp	0.95	26960556	31901187	0.202389	0.244505	0.375492	1.11022e-16	15.9546	4.65574e-14	13.332	5.00607	79
1	p36.11	CD164L2	NM_207397	27705665	27709823	0.20874	0.208776	BRCA	1p	del	tel	p	2	n-lp	0.95	26960556	31901187	0.202389	0.244505	0.375492	1.11022e-16	15.9546	4.65574e-14	13.332	5.00607	79
1	p36.11	GPR3	NM_005281	27719147	27722317	0.208855	0.208882	BRCA	1p	del	tel	p	2	n-lp	0.95	26960556	31901187	0.202389	0.244505	0.375492	1.11022e-16	15.9546	4.65574e-14	13.332	5.00607	79
1	p36.11	WASF2	NM_001201404	27730729	27816698	0.208954	0.209687	BRCA	1p	del	tel	p	2	n-lp	0.95	26960556	31901187	0.202389	0.244505	0.375492	1.11022e-16	15.9546	4.65574e-14	13.332	5.00607	79
1	p36.11	AHDC1	NM_001029882	27860755	27930005	0.210062	0.210653	BRCA	1p	del	tel	p	2	n-lp	0.95	26960556	31901187	0.202389	0.244505	0.375492	1.11022e-16	15.9546	4.65574e-14	13.332	5.00607	79
1	p36.11	FGR	NM_005248	27938800	27961727	0.210728	0.210923	BRCA	1p	del	tel	p	2	n-lp	0.95	26960556	31901187	0.202389	0.244505	0.375492	1.11022e-16	15.9546	4.65574e-14	13.332	5.00607	79
1	p36.11	LINC02574	NR_151722	27986838	27989233	0.211137	0.211158	BRCA	1p	del	tel	p	2	n-lp	0.95	26960556	31901187	0.202389	0.244505	0.375492	1.11022e-16	15.9546	4.65574e-14	13.332	5.00607	79
1	p36.11	IFI6	NM_002038	27992571	27998724	0.211186	0.211238	BRCA	1p	del	tel	p	2	n-lp	0.95	26960556	31901187	0.202389	0.244505	0.375492	1.11022e-16	15.9546	4.65574e-14	13.332	5.00607	79
1	p35.3	FAM76A	NM_152660	28052489	28089423	0.211697	0.212012	BRCA	1p	del	tel	p	2	n-lp	0.95	26960556	31901187	0.202389	0.244505	0.375492	1.11022e-16	15.9546	4.65574e-14	13.332	5.00607	79
1	p35.3	STX12	NM_177424	28099693	28150963	0.212099	0.212536	BRCA	1p	del	tel	p	2	n-lp	0.95	26960556	31901187	0.202389	0.244505	0.375492	1.11022e-16	15.9546	4.65574e-14	13.332	5.00607	79
1	p35.3	PPP1R8	NM_014110	28157251	28178183	0.21259	0.212768	BRCA	1p	del	tel	p	2	n-lp	0.95	26960556	31901187	0.202389	0.244505	0.375492	1.11022e-16	15.9546	4.65574e-14	13.332	5.00607	79
1	p35.3	SCARNA1	NR_002997	28160911	28161077	0.212621	0.212622	BRCA	1p	del	tel	p	2	n-lp	0.95	26960556	31901187	0.202389	0.244505	0.375492	1.11022e-16	15.9546	4.65574e-14	13.332	5.00607	79
1	p35.3	THEMIS2	NM_001286113	28199053	28213196	0.212946	0.213067	BRCA	1p	del	tel	p	2	n-lp	0.95	26960556	31901187	0.202389	0.244505	0.375492	1.11022e-16	15.9546	4.65574e-14	13.332	5.00607	79
1	p35.3	RPA2	NM_001286076	28218035	28241308	0.213108	0.213306	BRCA	1p	del	tel	p	2	n-lp	0.95	26960556	31901187	0.202389	0.244505	0.375492	1.11022e-16	15.9546	4.65574e-14	13.332	5.00607	79
1	p35.3	SMPDL3B	NM_014474	28261465	28285668	0.213478	0.213684	BRCA	1p	del	tel	p	2	n-lp	0.95	26960556	31901187	0.202389	0.244505	0.375492	1.11022e-16	15.9546	4.65574e-14	13.332	5.00607	79
1	p35.3	XKR8	NM_018053	28285972	28294607	0.213687	0.213761	BRCA	1p	del	tel	p	2	n-lp	0.95	26960556	31901187	0.202389	0.244505	0.375492	1.11022e-16	15.9546	4.65574e-14	13.332	5.00607	79
1	p35.3	EYA3	NM_001282562	28296854	28415148	0.21378	0.214788	BRCA	1p	del	tel	p	2	n-lp	0.95	26960556	31901187	0.202389	0.244505	0.375492	1.11022e-16	15.9546	4.65574e-14	13.332	5.00607	79
1	p35.3	PTAFR	NM_001164722	28473676	28520447	0.215287	0.215686	BRCA	1p	del	tel	p	2	n-lp	0.95	26960556	31901187	0.202389	0.244505	0.375492	1.11022e-16	15.9546	4.65574e-14	13.332	5.00607	79
1	p35.3	DNAJC8	NM_014280	28526789	28559542	0.21574	0.216019	BRCA	1p	del	tel	p	2	n-lp	0.95	26960556	31901187	0.202389	0.244505	0.375492	1.11022e-16	15.9546	4.65574e-14	13.332	5.00607	79
1	p35.3	ATP5IF1	NM_178191	28562601	28564616	0.216045	0.216062	BRCA	1p	del	tel	p	2	n-lp	0.95	26960556	31901187	0.202389	0.244505	0.375492	1.11022e-16	15.9546	4.65574e-14	13.332	5.00607	79
1	p35.3	SESN2	NM_031459	28585962	28609002	0.216244	0.216441	BRCA	1p	del	tel	p	2	n-lp	0.95	26960556	31901187	0.202389	0.244505	0.375492	1.11022e-16	15.9546	4.65574e-14	13.332	5.00607	79
1	p35.3	MED18	NM_001127350	28655512	28662478	0.216837	0.216897	BRCA	1p	del	tel	p	2	n-lp	0.95	26960556	31901187	0.202389	0.244505	0.375492	1.11022e-16	15.9546	4.65574e-14	13.332	5.00607	79
1	p35.3	PHACTR4	NM_001048183	28696064	28826881	0.217183	0.218298	BRCA	1p	del	tel	p	2	n-lp	0.95	26960556	31901187	0.202389	0.244505	0.375492	1.11022e-16	15.9546	4.65574e-14	13.332	5.00607	79
1	p35.3	RCC1	NR_030726	28832454	28865708	0.218346	0.218629	BRCA	1p	del	tel	p	2	n-lp	0.95	26960556	31901187	0.202389	0.244505	0.375492	1.11022e-16	15.9546	4.65574e-14	13.332	5.00607	79
1	p35.3	SNHG3	NR_002909	28832454	28837404	0.218346	0.218388	BRCA	1p	del	tel	p	2	n-lp	0.95	26960556	31901187	0.202389	0.244505	0.375492	1.11022e-16	15.9546	4.65574e-14	13.332	5.00607	79
1	p35.3	SNORA73B	NR_004404	28835069	28835274	0.218368	0.21837	BRCA	1p	del	tel	p	2	n-lp	0.95	26960556	31901187	0.202389	0.244505	0.375492	1.11022e-16	15.9546	4.65574e-14	13.332	5.00607	79
1	p35.3	TRNAU1AP	NR_003109	28879528	28905057	0.218747	0.218964	BRCA	1p	del	tel	p	2	n-lp	0.95	26960556	31901187	0.202389	0.244505	0.375492	1.11022e-16	15.9546	4.65574e-14	13.332	5.00607	79
1	p35.3	SNHG12	NR_146382	28905049	28909495	0.218964	0.219002	BRCA	1p	del	tel	p	2	n-lp	0.95	26960556	31901187	0.202389	0.244505	0.375492	1.11022e-16	15.9546	4.65574e-14	13.332	5.00607	79
1	p35.3	SNORD99	NR_003077	28905254	28905334	0.218966	0.218967	BRCA	1p	del	tel	p	2	n-lp	0.95	26960556	31901187	0.202389	0.244505	0.375492	1.11022e-16	15.9546	4.65574e-14	13.332	5.00607	79
1	p35.3	SNORA61	NR_002987	28906275	28906405	0.218975	0.218976	BRCA	1p	del	tel	p	2	n-lp	0.95	26960556	31901187	0.202389	0.244505	0.375492	1.11022e-16	15.9546	4.65574e-14	13.332	5.00607	79
1	p35.3	SNORA44	NR_002976	28906892	28907024	0.21898	0.218981	BRCA	1p	del	tel	p	2	n-lp	0.95	26960556	31901187	0.202389	0.244505	0.375492	1.11022e-16	15.9546	4.65574e-14	13.332	5.00607	79
1	p35.3	SNORA16A	NR_003035	28907431	28907565	0.218985	0.218986	BRCA	1p	del	tel	p	2	n-lp	0.95	26960556	31901187	0.202389	0.244505	0.375492	1.11022e-16	15.9546	4.65574e-14	13.332	5.00607	79
1	p35.3	RAB42	NM_152304	28918711	28921955	0.219081	0.219109	BRCA	1p	del	tel	p	2	n-lp	0.95	26960556	31901187	0.202389	0.244505	0.375492	1.11022e-16	15.9546	4.65574e-14	13.332	5.00607	79
1	p35.3	TAF12	NM_001135218	28929608	28969604	0.219174	0.219515	BRCA	1p	del	tel	p	2	n-lp	0.95	26960556	31901187	0.202389	0.244505	0.375492	1.11022e-16	15.9546	4.65574e-14	13.332	5.00607	79
1	p35.3	LINC01715	NR_146730	28969767	28975311	0.219516	0.219563	BRCA	1p	del	tel	p	2	n-lp	0.95	26960556	31901187	0.202389	0.244505	0.375492	1.11022e-16	15.9546	4.65574e-14	13.332	5.00607	79
1	p35.3	RNU11	NR_004407	28975111	28975246	0.219562	0.219563	BRCA	1p	del	tel	p	2	n-lp	0.95	26960556	31901187	0.202389	0.244505	0.375492	1.11022e-16	15.9546	4.65574e-14	13.332	5.00607	79
1	p35.3	GMEB1	NM_001319674	28995239	29042115	0.219733	0.220133	BRCA	1p	del	tel	p	2	n-lp	0.95	26960556	31901187	0.202389	0.244505	0.375492	1.11022e-16	15.9546	4.65574e-14	13.332	5.00607	79
1	p35.3	YTHDF2	NM_001173128	29063132	29096287	0.220312	0.220595	BRCA	1p	del	tel	p	2	n-lp	0.95	26960556	31901187	0.202389	0.244505	0.375492	1.11022e-16	15.9546	4.65574e-14	13.332	5.00607	79
1	p35.3	OPRD1	NM_000911	29138653	29190208	0.220956	0.221395	BRCA	1p	del	tel	p	2	n-lp	0.95	26960556	31901187	0.202389	0.244505	0.375492	1.11022e-16	15.9546	4.65574e-14	13.332	5.00607	79
1	p35.3	EPB41	NM_001166007	29213602	29446558	0.221595	0.22358	BRCA	1p	del	tel	p	2	n-lp	0.95	26960556	31901187	0.202389	0.244505	0.375492	1.11022e-16	15.9546	4.65574e-14	13.332	5.00607	79
1	p35.3	TMEM200B	NM_001003682	29445936	29450421	0.223575	0.223613	BRCA	1p	del	tel	p	2	n-lp	0.95	26960556	31901187	0.202389	0.244505	0.375492	1.11022e-16	15.9546	4.65574e-14	13.332	5.00607	79
1	p35.3	SRSF4	NM_005626	29474249	29508637	0.223817	0.22411	BRCA	1p	del	tel	p	2	n-lp	0.95	26960556	31901187	0.202389	0.244505	0.375492	1.11022e-16	15.9546	4.65574e-14	13.332	5.00607	79
1	p35.3	MECR	NM_001349714	29519168	29557470	0.224199	0.224526	BRCA	1p	del	tel	p	2	n-lp	0.95	26960556	31901187	0.202389	0.244505	0.375492	1.11022e-16	15.9546	4.65574e-14	13.332	5.00607	79
1	p35.3	PTPRU	NM_133177	29563027	29653325	0.224573	0.225343	BRCA	1p	del	tel	p	2	n-lp	0.95	26960556	31901187	0.202389	0.244505	0.375492	1.11022e-16	15.9546	4.65574e-14	13.332	5.00607	79
1	p35.3	LINC01756	NR_110758	29656131	29676626	0.225367	0.225542	BRCA	1p	del	tel	p	2	n-lp	0.95	26960556	31901187	0.202389	0.244505	0.375492	1.11022e-16	15.9546	4.65574e-14	13.332	5.00607	79
1	p35.2	LINC01648	NR_110790	30486798	30510459	0.232448	0.23265	BRCA	1p	del	tel	p	2	n-lp	0.95	26960556	31901187	0.202389	0.244505	0.375492	1.11022e-16	15.9546	4.65574e-14	13.332	5.00607	79
1	p35.2	MATN1	NM_002379	31184123	31196432	0.238392	0.238497	BRCA	1p	del	tel	p	2	n-lp	0.95	26960556	31901187	0.202389	0.244505	0.375492	1.11022e-16	15.9546	4.65574e-14	13.332	5.00607	79
1	p35.2	MATN1-AS1	NR_034182	31191618	31199593	0.238456	0.238524	BRCA	1p	del	tel	p	2	n-lp	0.95	26960556	31901187	0.202389	0.244505	0.375492	1.11022e-16	15.9546	4.65574e-14	13.332	5.00607	79
1	p35.2	LAPTM5	NM_006762	31205314	31230683	0.238573	0.238789	BRCA	1p	del	tel	p	2	n-lp	0.95	26960556	31901187	0.202389	0.244505	0.375492	1.11022e-16	15.9546	4.65574e-14	13.332	5.00607	79
1	p35.2	MIR4420	NR_039616	31212002	31212079	0.23863	0.238631	BRCA	1p	del	tel	p	2	n-lp	0.95	26960556	31901187	0.202389	0.244505	0.375492	1.11022e-16	15.9546	4.65574e-14	13.332	5.00607	79
1	p35.2	LINC01778	NR_146732	31297498	31307131	0.239359	0.239441	BRCA	1p	del	tel	p	2	n-lp	0.95	26960556	31901187	0.202389	0.244505	0.375492	1.11022e-16	15.9546	4.65574e-14	13.332	5.00607	79
1	p35.2	SDC3	NM_014654	31342312	31381480	0.239741	0.240075	BRCA	1p	del	tel	p	2	n-lp	0.95	26960556	31901187	0.202389	0.244505	0.375492	1.11022e-16	15.9546	4.65574e-14	13.332	5.00607	79
1	p35.2	PUM1	NM_014676	31404352	31538564	0.24027	0.241414	BRCA	1p	del	tel	p	2	n-lp	0.95	26960556	31901187	0.202389	0.244505	0.375492	1.11022e-16	15.9546	4.65574e-14	13.332	5.00607	79
1	p35.2	SNORD103A	NR_004054	31408535	31408623	0.240305	0.240306	BRCA	1p	del	tel	p	2	n-lp	0.95	26960556	31901187	0.202389	0.244505	0.375492	1.11022e-16	15.9546	4.65574e-14	13.332	5.00607	79
1	p35.2	SNORD103B	NR_033295	31408535	31408623	0.240305	0.240306	BRCA	1p	del	tel	p	2	n-lp	0.95	26960556	31901187	0.202389	0.244505	0.375492	1.11022e-16	15.9546	4.65574e-14	13.332	5.00607	79
1	p35.2	SNORD103C	NR_003066	31441009	31441084	0.240582	0.240583	BRCA	1p	del	tel	p	2	n-lp	0.95	26960556	31901187	0.202389	0.244505	0.375492	1.11022e-16	15.9546	4.65574e-14	13.332	5.00607	79
1	p35.2	NKAIN1	NM_024522	31652591	31712734	0.242386	0.242899	BRCA	1p	del	tel	p	2	n-lp	0.95	26960556	31901187	0.202389	0.244505	0.375492	1.11022e-16	15.9546	4.65574e-14	13.332	5.00607	79
1	p35.2	SNRNP40	NM_004814	31732414	31769644	0.243066	0.243384	BRCA	1p	del	tel	p	2	n-lp	0.95	26960556	31901187	0.202389	0.244505	0.375492	1.11022e-16	15.9546	4.65574e-14	13.332	5.00607	79
1	p35.2	ZCCHC17	NM_016505	31769828	31837800	0.243385	0.243965	BRCA	1p	del	tel	p	2	n-lp	0.95	26960556	31901187	0.202389	0.244505	0.375492	1.11022e-16	15.9546	4.65574e-14	13.332	5.00607	79
1	p35.2	FABP3	NM_001320996	31838099	31846135	0.243967	0.244036	BRCA	1p	del	tel	p	2	n-lp	0.95	26960556	31901187	0.202389	0.244505	0.375492	1.11022e-16	15.9546	4.65574e-14	13.332	5.00607	79
1	p35.2	SERINC2	NM_001199038	31882411	31907527	0.244345	0.244559	BRCA	1p	del	tel	p	2	n-lp	0.95	26960556	31901187	0.202389	0.244505	0.375492	1.11022e-16	15.9546	4.65574e-14	13.332	5.00607	79
11	q13.3	FGF3	NM_005247	69624735	69634192	0.825788	0.825667	BRCA	11q	del	tel	n	2	p-rn	0.95	69610793	70530336	0.814197	0.825967	0.305839	0	inf	0	16	4.89343	10
11	q13.3	LOC101928443	NR_120529	69902335	69911477	0.822235	0.822118	BRCA	11q	del	tel	n	2	p-rn	0.95	69610793	70530336	0.814197	0.825967	0.305839	0	inf	0	16	4.89343	10
11	q13.3	ANO1-AS2	NR_103835	69918539	69921454	0.822028	0.82199	BRCA	11q	del	tel	n	2	p-rn	0.95	69610793	70530336	0.814197	0.825967	0.305839	0	inf	0	16	4.89343	10
11	q13.3	ANO1	NM_018043	69924407	70035652	0.821953	0.820529	BRCA	11q	del	tel	n	2	p-rn	0.95	69610793	70530336	0.814197	0.825967	0.305839	0	inf	0	16	4.89343	10
11	q13.3	FADD	NM_003824	70049268	70053508	0.820355	0.8203	BRCA	11q	del	tel	n	2	p-rn	0.95	69610793	70530336	0.814197	0.825967	0.305839	0	inf	0	16	4.89343	10
11	q13.3	PPFIA1	NM_003626	70116805	70230607	0.81949	0.818034	BRCA	11q	del	tel	n	2	p-rn	0.95	69610793	70530336	0.814197	0.825967	0.305839	0	inf	0	16	4.89343	10
11	q13.3	MIR548K	NR_031624	70130060	70130176	0.81932	0.819319	BRCA	11q	del	tel	n	2	p-rn	0.95	69610793	70530336	0.814197	0.825967	0.305839	0	inf	0	16	4.89343	10
11	q13.3	CTTN	NM_138565	70244611	70282690	0.817854	0.817367	BRCA	11q	del	tel	n	2	p-rn	0.95	69610793	70530336	0.814197	0.825967	0.305839	0	inf	0	16	4.89343	10
11	q13.4	SHANK2	NM_012309	70313960	70935842	0.816967	0.809007	BRCA	11q	del	tel	n	2	p-rn	0.95	69610793	70530336	0.814197	0.825967	0.305839	0	inf	0	16	4.89343	10
11	q13.4	SHANK2-AS1	NR_046567	70477198	70481595	0.814877	0.814821	BRCA	11q	del	tel	n	2	p-rn	0.95	69610793	70530336	0.814197	0.825967	0.305839	0	inf	0	16	4.89343	10
6	p24.1	LOC101928253	NR_125853	11990575	12001477	0.195335	0.195529	BRCA	6p	del	tel	n	1	n	0.95	11786631	17573985	0.191705	0.294698	0.378202	4.66516e-13	12.3311	1.37566e-10	9.86149	3.72964	28
6	p24.1	HIVEP1	NM_002114	12012723	12165232	0.195729	0.198443	BRCA	6p	del	tel	n	1	n	0.95	11786631	17573985	0.191705	0.294698	0.378202	4.66516e-13	12.3311	1.37566e-10	9.86149	3.72964	28
6	p24.1	EDN1	NM_001168319	12290528	12297427	0.200673	0.200796	BRCA	6p	del	tel	n	1	n	0.95	11786631	17573985	0.191705	0.294698	0.378202	4.66516e-13	12.3311	1.37566e-10	9.86149	3.72964	28
6	p24.1	LINC02530	NR_149140	12582999	12585636	0.205878	0.205925	BRCA	6p	del	tel	n	1	n	0.95	11786631	17573985	0.191705	0.294698	0.378202	4.66516e-13	12.3311	1.37566e-10	9.86149	3.72964	28
6	p24.1	PHACTR1	NM_001242648	12716887	13288075	0.20826	0.218425	BRCA	6p	del	tel	n	1	n	0.95	11786631	17573985	0.191705	0.294698	0.378202	4.66516e-13	12.3311	1.37566e-10	9.86149	3.72964	28
6	p24.1	TBC1D7-LOC100130357	NM_001318809	13266773	13328815	0.218046	0.21915	BRCA	6p	del	tel	n	1	n	0.95	11786631	17573985	0.191705	0.294698	0.378202	4.66516e-13	12.3311	1.37566e-10	9.86149	3.72964	28
6	p24.1	LOC100130357	NM_001242698	13279526	13295818	0.218273	0.218563	BRCA	6p	del	tel	n	1	n	0.95	11786631	17573985	0.191705	0.294698	0.378202	4.66516e-13	12.3311	1.37566e-10	9.86149	3.72964	28
6	p24.1	TBC1D7	NM_016495	13305183	13328815	0.21873	0.21915	BRCA	6p	del	tel	n	1	n	0.95	11786631	17573985	0.191705	0.294698	0.378202	4.66516e-13	12.3311	1.37566e-10	9.86149	3.72964	28
6	p23	GFOD1	NM_018988	13363586	13487869	0.219769	0.221981	BRCA	6p	del	tel	n	1	n	0.95	11786631	17573985	0.191705	0.294698	0.378202	4.66516e-13	12.3311	1.37566e-10	9.86149	3.72964	28
6	p23	SIRT5	NM_001193267	13574760	13615390	0.223527	0.22425	BRCA	6p	del	tel	n	1	n	0.95	11786631	17573985	0.191705	0.294698	0.378202	4.66516e-13	12.3311	1.37566e-10	9.86149	3.72964	28
6	p23	NOL7	NM_001317724	13615558	13632702	0.224253	0.224558	BRCA	6p	del	tel	n	1	n	0.95	11786631	17573985	0.191705	0.294698	0.378202	4.66516e-13	12.3311	1.37566e-10	9.86149	3.72964	28
6	p23	RANBP9	NM_005493	13621729	13711796	0.224363	0.225966	BRCA	6p	del	tel	n	1	n	0.95	11786631	17573985	0.191705	0.294698	0.378202	4.66516e-13	12.3311	1.37566e-10	9.86149	3.72964	28
6	p23	MCUR1	NM_001031713	13786780	13814792	0.2273	0.227799	BRCA	6p	del	tel	n	1	n	0.95	11786631	17573985	0.191705	0.294698	0.378202	4.66516e-13	12.3311	1.37566e-10	9.86149	3.72964	28
6	p23	RNF182	NM_001165034	13924676	13980240	0.229754	0.230743	BRCA	6p	del	tel	n	1	n	0.95	11786631	17573985	0.191705	0.294698	0.378202	4.66516e-13	12.3311	1.37566e-10	9.86149	3.72964	28
6	p23	CD83	NM_001251901	14117486	14137148	0.233185	0.233535	BRCA	6p	del	tel	n	1	n	0.95	11786631	17573985	0.191705	0.294698	0.378202	4.66516e-13	12.3311	1.37566e-10	9.86149	3.72964	28
6	p23	LINC01108	NR_108096	14280357	14285685	0.236084	0.236179	BRCA	6p	del	tel	n	1	n	0.95	11786631	17573985	0.191705	0.294698	0.378202	4.66516e-13	12.3311	1.37566e-10	9.86149	3.72964	28
6	p22.3	JARID2	NM_004973	15246205	15522273	0.253272	0.258185	BRCA	6p	del	tel	n	1	n	0.95	11786631	17573985	0.191705	0.294698	0.378202	4.66516e-13	12.3311	1.37566e-10	9.86149	3.72964	28
6	p22.3	JARID2-AS1	NR_120502	15248045	15248927	0.253305	0.253321	BRCA	6p	del	tel	n	1	n	0.95	11786631	17573985	0.191705	0.294698	0.378202	4.66516e-13	12.3311	1.37566e-10	9.86149	3.72964	28
6	p22.3	DTNBP1	NM_032122	15523031	15663289	0.258199	0.260695	BRCA	6p	del	tel	n	1	n	0.95	11786631	17573985	0.191705	0.294698	0.378202	4.66516e-13	12.3311	1.37566e-10	9.86149	3.72964	28
6	p22.3	MYLIP	NM_013262	16129316	16148478	0.268988	0.269329	BRCA	6p	del	tel	n	1	n	0.95	11786631	17573985	0.191705	0.294698	0.378202	4.66516e-13	12.3311	1.37566e-10	9.86149	3.72964	28
6	p22.3	MIR4639	NR_039782	16141786	16141855	0.26921	0.269211	BRCA	6p	del	tel	n	1	n	0.95	11786631	17573985	0.191705	0.294698	0.378202	4.66516e-13	12.3311	1.37566e-10	9.86149	3.72964	28
6	p22.3	GMPR	NM_006877	16238810	16295780	0.270937	0.271951	BRCA	6p	del	tel	n	1	n	0.95	11786631	17573985	0.191705	0.294698	0.378202	4.66516e-13	12.3311	1.37566e-10	9.86149	3.72964	28
6	p22.3	ATXN1	NM_001128164	16299342	16761721	0.272014	0.280242	BRCA	6p	del	tel	n	1	n	0.95	11786631	17573985	0.191705	0.294698	0.378202	4.66516e-13	12.3311	1.37566e-10	9.86149	3.72964	28
6	p22.3	LOC101928433	NR_136240	16761368	16767114	0.280236	0.280338	BRCA	6p	del	tel	n	1	n	0.95	11786631	17573985	0.191705	0.294698	0.378202	4.66516e-13	12.3311	1.37566e-10	9.86149	3.72964	28
6	p22.3	STMND1	NM_001190766	17102488	17131603	0.286307	0.286825	BRCA	6p	del	tel	n	1	n	0.95	11786631	17573985	0.191705	0.294698	0.378202	4.66516e-13	12.3311	1.37566e-10	9.86149	3.72964	28
6	p22.3	RBM24	NM_001143942	17281808	17294099	0.289498	0.289717	BRCA	6p	del	tel	n	1	n	0.95	11786631	17573985	0.191705	0.294698	0.378202	4.66516e-13	12.3311	1.37566e-10	9.86149	3.72964	28
6	p22.3	CAP2	NM_006366	17393735	17558023	0.29149	0.294413	BRCA	6p	del	tel	n	1	n	0.95	11786631	17573985	0.191705	0.294698	0.378202	4.66516e-13	12.3311	1.37566e-10	9.86149	3.72964	28
6	p22.3	LOC101928491	NR_110855	17501595	17511496	0.293409	0.293585	BRCA	6p	del	tel	n	1	n	0.95	11786631	17573985	0.191705	0.294698	0.378202	4.66516e-13	12.3311	1.37566e-10	9.86149	3.72964	28
3	p22.1	MYRIP	NM_001284423	39850404	40301811	0.426378	0.431492	BRCA	3p	amp	tel	n	1	n	0.95	40260181	52129042	0.43102	0.565476	0.369772	1.7788e-12	11.7499	4.89909e-10	9.30988	3.44254	248
3	p22.1	EIF1B-AS1	NR_033965	40214637	40351189	0.430504	0.432051	BRCA	3p	amp	tel	n	1	n	0.95	40260181	52129042	0.43102	0.565476	0.369772	1.7788e-12	11.7499	4.89909e-10	9.30988	3.44254	248
3	p22.1	EIF1B	NM_005875	40351172	40353915	0.432051	0.432082	BRCA	3p	amp	tel	n	1	n	0.95	40260181	52129042	0.43102	0.565476	0.369772	1.7788e-12	11.7499	4.89909e-10	9.30988	3.44254	248
3	p22.1	ENTPD3	NM_001248	40428646	40470117	0.432929	0.433398	BRCA	3p	amp	tel	n	1	n	0.95	40260181	52129042	0.43102	0.565476	0.369772	1.7788e-12	11.7499	4.89909e-10	9.30988	3.44254	248
3	p22.1	ENTPD3-AS1	NR_040100	40432441	40494799	0.432972	0.433678	BRCA	3p	amp	tel	n	1	n	0.95	40260181	52129042	0.43102	0.565476	0.369772	1.7788e-12	11.7499	4.89909e-10	9.30988	3.44254	248
3	p22.1	RPL14	NM_003973	40498782	40503863	0.433723	0.433781	BRCA	3p	amp	tel	n	1	n	0.95	40260181	52129042	0.43102	0.565476	0.369772	1.7788e-12	11.7499	4.89909e-10	9.30988	3.44254	248
3	p22.1	ZNF619	NM_001145082	40518603	40531728	0.433948	0.434096	BRCA	3p	amp	tel	n	1	n	0.95	40260181	52129042	0.43102	0.565476	0.369772	1.7788e-12	11.7499	4.89909e-10	9.30988	3.44254	248
3	p22.1	ZNF620	NM_001256167	40547529	40559712	0.434275	0.434413	BRCA	3p	amp	tel	n	1	n	0.95	40260181	52129042	0.43102	0.565476	0.369772	1.7788e-12	11.7499	4.89909e-10	9.30988	3.44254	248
3	p22.1	ZNF621	NM_001287245	40566368	40581285	0.434489	0.434658	BRCA	3p	amp	tel	n	1	n	0.95	40260181	52129042	0.43102	0.565476	0.369772	1.7788e-12	11.7499	4.89909e-10	9.30988	3.44254	248
3	p22.1	CTNNB1	NM_001330729	41240914	41281944	0.44213	0.442595	BRCA	3p	amp	tel	n	1	n	0.95	40260181	52129042	0.43102	0.565476	0.369772	1.7788e-12	11.7499	4.89909e-10	9.30988	3.44254	248
3	p22.1	ULK4	NM_017886	41288089	42003932	0.442665	0.450774	BRCA	3p	amp	tel	n	1	n	0.95	40260181	52129042	0.43102	0.565476	0.369772	1.7788e-12	11.7499	4.89909e-10	9.30988	3.44254	248
3	p22.1	TRAK1	NR_146089	42128691	42267382	0.452187	0.453759	BRCA	3p	amp	tel	n	1	n	0.95	40260181	52129042	0.43102	0.565476	0.369772	1.7788e-12	11.7499	4.89909e-10	9.30988	3.44254	248
3	p22.1	CCK	NM_000729	42299315	42307687	0.45412	0.454215	BRCA	3p	amp	tel	n	1	n	0.95	40260181	52129042	0.43102	0.565476	0.369772	1.7788e-12	11.7499	4.89909e-10	9.30988	3.44254	248
3	p22.1	LYZL4	NM_144634	42438569	42452094	0.455698	0.455851	BRCA	3p	amp	tel	n	1	n	0.95	40260181	52129042	0.43102	0.565476	0.369772	1.7788e-12	11.7499	4.89909e-10	9.30988	3.44254	248
3	p22.1	VIPR1	NM_001251882	42530790	42579065	0.456743	0.457289	BRCA	3p	amp	tel	n	1	n	0.95	40260181	52129042	0.43102	0.565476	0.369772	1.7788e-12	11.7499	4.89909e-10	9.30988	3.44254	248
3	p22.1	VIPR1-AS1	NR_046654	42572387	42574098	0.457214	0.457233	BRCA	3p	amp	tel	n	1	n	0.95	40260181	52129042	0.43102	0.565476	0.369772	1.7788e-12	11.7499	4.89909e-10	9.30988	3.44254	248
3	p22.1	SEC22C	NM_001201572	42589458	42642572	0.457407	0.458009	BRCA	3p	amp	tel	n	1	n	0.95	40260181	52129042	0.43102	0.565476	0.369772	1.7788e-12	11.7499	4.89909e-10	9.30988	3.44254	248
3	p22.1	SS18L2	NM_016305	42623331	42636490	0.457791	0.45794	BRCA	3p	amp	tel	n	1	n	0.95	40260181	52129042	0.43102	0.565476	0.369772	1.7788e-12	11.7499	4.89909e-10	9.30988	3.44254	248
3	p22.1	NKTR	NM_001349125	42642146	42690233	0.458004	0.458549	BRCA	3p	amp	tel	n	1	n	0.95	40260181	52129042	0.43102	0.565476	0.369772	1.7788e-12	11.7499	4.89909e-10	9.30988	3.44254	248
3	p22.1	LOC101928323	NR_125400	42653801	42695880	0.458136	0.458613	BRCA	3p	amp	tel	n	1	n	0.95	40260181	52129042	0.43102	0.565476	0.369772	1.7788e-12	11.7499	4.89909e-10	9.30988	3.44254	248
3	p22.1	ZBTB47	NM_145166	42695175	42709072	0.458605	0.458762	BRCA	3p	amp	tel	n	1	n	0.95	40260181	52129042	0.43102	0.565476	0.369772	1.7788e-12	11.7499	4.89909e-10	9.30988	3.44254	248
3	p22.1	KLHL40	NM_152393	42727010	42733938	0.458965	0.459044	BRCA	3p	amp	tel	n	1	n	0.95	40260181	52129042	0.43102	0.565476	0.369772	1.7788e-12	11.7499	4.89909e-10	9.30988	3.44254	248
3	p22.1	HHATL	NM_020707	42734154	42744319	0.459046	0.459162	BRCA	3p	amp	tel	n	1	n	0.95	40260181	52129042	0.43102	0.565476	0.369772	1.7788e-12	11.7499	4.89909e-10	9.30988	3.44254	248
3	p22.1	HHATL-AS1	NR_146957	42744032	42748257	0.459158	0.459206	BRCA	3p	amp	tel	n	1	n	0.95	40260181	52129042	0.43102	0.565476	0.369772	1.7788e-12	11.7499	4.89909e-10	9.30988	3.44254	248
3	p22.1	CCDC13	NM_144719	42749873	42814745	0.459224	0.459959	BRCA	3p	amp	tel	n	1	n	0.95	40260181	52129042	0.43102	0.565476	0.369772	1.7788e-12	11.7499	4.89909e-10	9.30988	3.44254	248
3	p22.1	CCDC13-AS1	NR_046732	42774066	42786650	0.459499	0.459641	BRCA	3p	amp	tel	n	1	n	0.95	40260181	52129042	0.43102	0.565476	0.369772	1.7788e-12	11.7499	4.89909e-10	9.30988	3.44254	248
3	p22.1	LINC02158	NR_122070	42812103	42815126	0.459929	0.459964	BRCA	3p	amp	tel	n	1	n	0.95	40260181	52129042	0.43102	0.565476	0.369772	1.7788e-12	11.7499	4.89909e-10	9.30988	3.44254	248
3	p22.1	HIGD1A	NM_014056	42824399	42846027	0.460069	0.460314	BRCA	3p	amp	tel	n	1	n	0.95	40260181	52129042	0.43102	0.565476	0.369772	1.7788e-12	11.7499	4.89909e-10	9.30988	3.44254	248
3	p22.1	ACKR2	NM_001296	42850963	42908775	0.46037	0.461025	BRCA	3p	amp	tel	n	1	n	0.95	40260181	52129042	0.43102	0.565476	0.369772	1.7788e-12	11.7499	4.89909e-10	9.30988	3.44254	248
3	p22.1	CYP8B1	NM_004391	42913683	42917633	0.46108	0.461125	BRCA	3p	amp	tel	n	1	n	0.95	40260181	52129042	0.43102	0.565476	0.369772	1.7788e-12	11.7499	4.89909e-10	9.30988	3.44254	248
3	p22.1	ZNF662	NM_207404	42947401	42960825	0.461462	0.461614	BRCA	3p	amp	tel	n	1	n	0.95	40260181	52129042	0.43102	0.565476	0.369772	1.7788e-12	11.7499	4.89909e-10	9.30988	3.44254	248
3	p22.1	KRBOX1-AS1	NR_122033	42975735	42978277	0.461783	0.461812	BRCA	3p	amp	tel	n	1	n	0.95	40260181	52129042	0.43102	0.565476	0.369772	1.7788e-12	11.7499	4.89909e-10	9.30988	3.44254	248
3	p22.1	KRBOX1	NM_001205272	42977833	42984283	0.461807	0.46188	BRCA	3p	amp	tel	n	1	n	0.95	40260181	52129042	0.43102	0.565476	0.369772	1.7788e-12	11.7499	4.89909e-10	9.30988	3.44254	248
3	p22.1	FAM198A	NM_001129908	43020758	43099207	0.462293	0.463182	BRCA	3p	amp	tel	n	1	n	0.95	40260181	52129042	0.43102	0.565476	0.369772	1.7788e-12	11.7499	4.89909e-10	9.30988	3.44254	248
3	p22.1	POMGNT2	NM_032806	43120720	43147575	0.463426	0.46373	BRCA	3p	amp	tel	n	1	n	0.95	40260181	52129042	0.43102	0.565476	0.369772	1.7788e-12	11.7499	4.89909e-10	9.30988	3.44254	248
3	p22.1	SNRK	NM_001330750	43328003	43392634	0.465774	0.466506	BRCA	3p	amp	tel	n	1	n	0.95	40260181	52129042	0.43102	0.565476	0.369772	1.7788e-12	11.7499	4.89909e-10	9.30988	3.44254	248
3	p22.1	SNRK-AS1	NR_046757	43388410	43393454	0.466458	0.466515	BRCA	3p	amp	tel	n	1	n	0.95	40260181	52129042	0.43102	0.565476	0.369772	1.7788e-12	11.7499	4.89909e-10	9.30988	3.44254	248
3	p22.1	ANO10	NM_001346469	43407817	43733086	0.466678	0.470363	BRCA	3p	amp	tel	n	1	n	0.95	40260181	52129042	0.43102	0.565476	0.369772	1.7788e-12	11.7499	4.89909e-10	9.30988	3.44254	248
3	p21.33	ABHD5	NM_001355186	43732361	43775863	0.470355	0.470847	BRCA	3p	amp	tel	n	1	n	0.95	40260181	52129042	0.43102	0.565476	0.369772	1.7788e-12	11.7499	4.89909e-10	9.30988	3.44254	248
3	p21.32	MIR138-1	NR_029700	44155703	44155802	0.47515	0.475151	BRCA	3p	amp	tel	n	1	n	0.95	40260181	52129042	0.43102	0.565476	0.369772	1.7788e-12	11.7499	4.89909e-10	9.30988	3.44254	248
3	p21.31	TOPAZ1	NM_001145030	44283377	44373590	0.476597	0.477619	BRCA	3p	amp	tel	n	1	n	0.95	40260181	52129042	0.43102	0.565476	0.369772	1.7788e-12	11.7499	4.89909e-10	9.30988	3.44254	248
3	p21.31	TCAIM	NM_001282913	44379610	44450940	0.477687	0.478495	BRCA	3p	amp	tel	n	1	n	0.95	40260181	52129042	0.43102	0.565476	0.369772	1.7788e-12	11.7499	4.89909e-10	9.30988	3.44254	248
3	p21.31	LINC00694	NM_001351480	44462623	44465517	0.478627	0.47866	BRCA	3p	amp	tel	n	1	n	0.95	40260181	52129042	0.43102	0.565476	0.369772	1.7788e-12	11.7499	4.89909e-10	9.30988	3.44254	248
3	p21.31	LINC01988	NR_144436	44469413	44471021	0.478704	0.478722	BRCA	3p	amp	tel	n	1	n	0.95	40260181	52129042	0.43102	0.565476	0.369772	1.7788e-12	11.7499	4.89909e-10	9.30988	3.44254	248
3	p21.31	ZNF445	NM_181489	44481261	44519162	0.478838	0.479268	BRCA	3p	amp	tel	n	1	n	0.95	40260181	52129042	0.43102	0.565476	0.369772	1.7788e-12	11.7499	4.89909e-10	9.30988	3.44254	248
3	p21.31	ZNF852	NM_001287349	44540461	44552132	0.479509	0.479641	BRCA	3p	amp	tel	n	1	n	0.95	40260181	52129042	0.43102	0.565476	0.369772	1.7788e-12	11.7499	4.89909e-10	9.30988	3.44254	248
3	p21.31	ZKSCAN7	NM_025169	44596666	44624956	0.480146	0.480466	BRCA	3p	amp	tel	n	1	n	0.95	40260181	52129042	0.43102	0.565476	0.369772	1.7788e-12	11.7499	4.89909e-10	9.30988	3.44254	248
3	p21.31	ZNF660	NM_173658	44626341	44641185	0.480482	0.48065	BRCA	3p	amp	tel	n	1	n	0.95	40260181	52129042	0.43102	0.565476	0.369772	1.7788e-12	11.7499	4.89909e-10	9.30988	3.44254	248
3	p21.31	ZNF660-ZNF197	NM_001351734	44626341	44689963	0.480482	0.481203	BRCA	3p	amp	tel	n	1	n	0.95	40260181	52129042	0.43102	0.565476	0.369772	1.7788e-12	11.7499	4.89909e-10	9.30988	3.44254	248
3	p21.31	ZNF197-AS1	NR_046658	44658619	44666289	0.480848	0.480934	BRCA	3p	amp	tel	n	1	n	0.95	40260181	52129042	0.43102	0.565476	0.369772	1.7788e-12	11.7499	4.89909e-10	9.30988	3.44254	248
3	p21.31	ZNF197	NM_006991	44666510	44689963	0.480937	0.481203	BRCA	3p	amp	tel	n	1	n	0.95	40260181	52129042	0.43102	0.565476	0.369772	1.7788e-12	11.7499	4.89909e-10	9.30988	3.44254	248
3	p21.31	ZNF35	NM_003420	44690232	44702283	0.481206	0.481342	BRCA	3p	amp	tel	n	1	n	0.95	40260181	52129042	0.43102	0.565476	0.369772	1.7788e-12	11.7499	4.89909e-10	9.30988	3.44254	248
3	p21.31	ZNF502	NM_033210	44754134	44765323	0.48193	0.482056	BRCA	3p	amp	tel	n	1	n	0.95	40260181	52129042	0.43102	0.565476	0.369772	1.7788e-12	11.7499	4.89909e-10	9.30988	3.44254	248
3	p21.31	ZNF501	NM_145044	44771097	44778575	0.482122	0.482207	BRCA	3p	amp	tel	n	1	n	0.95	40260181	52129042	0.43102	0.565476	0.369772	1.7788e-12	11.7499	4.89909e-10	9.30988	3.44254	248
3	p21.31	KIAA1143	NM_020696	44790235	44803173	0.482339	0.482485	BRCA	3p	amp	tel	n	1	n	0.95	40260181	52129042	0.43102	0.565476	0.369772	1.7788e-12	11.7499	4.89909e-10	9.30988	3.44254	248
3	p21.31	KIF15	NM_020242	44803208	44894748	0.482486	0.483523	BRCA	3p	amp	tel	n	1	n	0.95	40260181	52129042	0.43102	0.565476	0.369772	1.7788e-12	11.7499	4.89909e-10	9.30988	3.44254	248
3	p21.31	MIR564	NR_030290	44903379	44903473	0.48362	0.483621	BRCA	3p	amp	tel	n	1	n	0.95	40260181	52129042	0.43102	0.565476	0.369772	1.7788e-12	11.7499	4.89909e-10	9.30988	3.44254	248
3	p21.31	TMEM42	NM_144638	44903400	44907159	0.483621	0.483663	BRCA	3p	amp	tel	n	1	n	0.95	40260181	52129042	0.43102	0.565476	0.369772	1.7788e-12	11.7499	4.89909e-10	9.30988	3.44254	248
3	p21.31	TGM4	NM_003241	44916097	44956088	0.483764	0.484217	BRCA	3p	amp	tel	n	1	n	0.95	40260181	52129042	0.43102	0.565476	0.369772	1.7788e-12	11.7499	4.89909e-10	9.30988	3.44254	248
3	p21.31	ZDHHC3	NM_001349380	44956752	45017677	0.484225	0.484915	BRCA	3p	amp	tel	n	1	n	0.95	40260181	52129042	0.43102	0.565476	0.369772	1.7788e-12	11.7499	4.89909e-10	9.30988	3.44254	248
3	p21.31	EXOSC7	NR_023353	45017740	45054158	0.484916	0.485328	BRCA	3p	amp	tel	n	1	n	0.95	40260181	52129042	0.43102	0.565476	0.369772	1.7788e-12	11.7499	4.89909e-10	9.30988	3.44254	248
3	p21.31	CLEC3B	NM_003278	45067758	45077563	0.485483	0.485594	BRCA	3p	amp	tel	n	1	n	0.95	40260181	52129042	0.43102	0.565476	0.369772	1.7788e-12	11.7499	4.89909e-10	9.30988	3.44254	248
3	p21.31	CDCP1	NM_022842	45123765	45187914	0.486117	0.486844	BRCA	3p	amp	tel	n	1	n	0.95	40260181	52129042	0.43102	0.565476	0.369772	1.7788e-12	11.7499	4.89909e-10	9.30988	3.44254	248
3	p21.31	TMEM158	NM_015444	45265955	45267814	0.487728	0.487749	BRCA	3p	amp	tel	n	1	n	0.95	40260181	52129042	0.43102	0.565476	0.369772	1.7788e-12	11.7499	4.89909e-10	9.30988	3.44254	248
3	p21.31	LARS2	NM_015340	45430074	45590328	0.489587	0.491402	BRCA	3p	amp	tel	n	1	n	0.95	40260181	52129042	0.43102	0.565476	0.369772	1.7788e-12	11.7499	4.89909e-10	9.30988	3.44254	248
3	p21.31	LARS2-AS1	NR_048543	45524186	45551037	0.490653	0.490957	BRCA	3p	amp	tel	n	1	n	0.95	40260181	52129042	0.43102	0.565476	0.369772	1.7788e-12	11.7499	4.89909e-10	9.30988	3.44254	248
3	p21.31	LIMD1	NM_014240	45636322	45722755	0.491923	0.492903	BRCA	3p	amp	tel	n	1	n	0.95	40260181	52129042	0.43102	0.565476	0.369772	1.7788e-12	11.7499	4.89909e-10	9.30988	3.44254	248
3	p21.31	LIMD1-AS1	NR_033947	45719656	45730374	0.492867	0.492989	BRCA	3p	amp	tel	n	1	n	0.95	40260181	52129042	0.43102	0.565476	0.369772	1.7788e-12	11.7499	4.89909e-10	9.30988	3.44254	248
3	p21.31	SACM1L	NM_014016	45730732	45786917	0.492993	0.493629	BRCA	3p	amp	tel	n	1	n	0.95	40260181	52129042	0.43102	0.565476	0.369772	1.7788e-12	11.7499	4.89909e-10	9.30988	3.44254	248
3	p21.31	SLC6A20	NM_022405	45796940	45838035	0.493743	0.494209	BRCA	3p	amp	tel	n	1	n	0.95	40260181	52129042	0.43102	0.565476	0.369772	1.7788e-12	11.7499	4.89909e-10	9.30988	3.44254	248
3	p21.31	LZTFL1	NM_001276379	45864809	45957216	0.494512	0.495559	BRCA	3p	amp	tel	n	1	n	0.95	40260181	52129042	0.43102	0.565476	0.369772	1.7788e-12	11.7499	4.89909e-10	9.30988	3.44254	248
3	p21.31	CCR9	NM_031200	45927995	45944667	0.495228	0.495417	BRCA	3p	amp	tel	n	1	n	0.95	40260181	52129042	0.43102	0.565476	0.369772	1.7788e-12	11.7499	4.89909e-10	9.30988	3.44254	248
3	p21.31	FYCO1	NM_024513	45959390	46037316	0.495583	0.496466	BRCA	3p	amp	tel	n	1	n	0.95	40260181	52129042	0.43102	0.565476	0.369772	1.7788e-12	11.7499	4.89909e-10	9.30988	3.44254	248
3	p21.31	CXCR6	NM_006564	45984972	45989845	0.495873	0.495928	BRCA	3p	amp	tel	n	1	n	0.95	40260181	52129042	0.43102	0.565476	0.369772	1.7788e-12	11.7499	4.89909e-10	9.30988	3.44254	248
3	p21.31	XCR1	NM_005283	46062290	46068979	0.496749	0.496825	BRCA	3p	amp	tel	n	1	n	0.95	40260181	52129042	0.43102	0.565476	0.369772	1.7788e-12	11.7499	4.89909e-10	9.30988	3.44254	248
3	p21.31	CCR1	NM_001295	46243199	46249832	0.498798	0.498874	BRCA	3p	amp	tel	n	1	n	0.95	40260181	52129042	0.43102	0.565476	0.369772	1.7788e-12	11.7499	4.89909e-10	9.30988	3.44254	248
3	p21.31	CCR3	NM_178329	46283871	46308197	0.499259	0.499535	BRCA	3p	amp	tel	n	1	n	0.95	40260181	52129042	0.43102	0.565476	0.369772	1.7788e-12	11.7499	4.89909e-10	9.30988	3.44254	248
3	p21.31	CCR2	NM_001123041	46395234	46402413	0.500521	0.500602	BRCA	3p	amp	tel	n	1	n	0.95	40260181	52129042	0.43102	0.565476	0.369772	1.7788e-12	11.7499	4.89909e-10	9.30988	3.44254	248
3	p21.31	LOC102724297	NR_125406	46406150	46448550	0.500644	0.501125	BRCA	3p	amp	tel	n	1	n	0.95	40260181	52129042	0.43102	0.565476	0.369772	1.7788e-12	11.7499	4.89909e-10	9.30988	3.44254	248
3	p21.31	CCR5	NM_001100168	46411632	46417697	0.500707	0.500775	BRCA	3p	amp	tel	n	1	n	0.95	40260181	52129042	0.43102	0.565476	0.369772	1.7788e-12	11.7499	4.89909e-10	9.30988	3.44254	248
3	p21.31	CCRL2	NM_003965	46448720	46451014	0.501127	0.501153	BRCA	3p	amp	tel	n	1	n	0.95	40260181	52129042	0.43102	0.565476	0.369772	1.7788e-12	11.7499	4.89909e-10	9.30988	3.44254	248
3	p21.31	LINC02009	NR_151704	46458006	46465158	0.501232	0.501313	BRCA	3p	amp	tel	n	1	n	0.95	40260181	52129042	0.43102	0.565476	0.369772	1.7788e-12	11.7499	4.89909e-10	9.30988	3.44254	248
3	p21.31	LTF	NM_001321122	46477495	46526724	0.501453	0.50201	BRCA	3p	amp	tel	n	1	n	0.95	40260181	52129042	0.43102	0.565476	0.369772	1.7788e-12	11.7499	4.89909e-10	9.30988	3.44254	248
3	p21.31	RTP3	NM_031440	46539484	46542439	0.502155	0.502188	BRCA	3p	amp	tel	n	1	n	0.95	40260181	52129042	0.43102	0.565476	0.369772	1.7788e-12	11.7499	4.89909e-10	9.30988	3.44254	248
3	p21.31	LRRC2	NM_024512	46556877	46608040	0.502352	0.502932	BRCA	3p	amp	tel	n	1	n	0.95	40260181	52129042	0.43102	0.565476	0.369772	1.7788e-12	11.7499	4.89909e-10	9.30988	3.44254	248
3	p21.31	LRRC2-AS1	NR_073385	46598887	46601178	0.502828	0.502854	BRCA	3p	amp	tel	n	1	n	0.95	40260181	52129042	0.43102	0.565476	0.369772	1.7788e-12	11.7499	4.89909e-10	9.30988	3.44254	248
3	p21.31	TDGF1	NM_001174136	46616044	46623952	0.503022	0.503112	BRCA	3p	amp	tel	n	1	n	0.95	40260181	52129042	0.43102	0.565476	0.369772	1.7788e-12	11.7499	4.89909e-10	9.30988	3.44254	248
3	p21.31	FAM240A	NM_001195442	46653924	46668033	0.503451	0.503611	BRCA	3p	amp	tel	n	1	n	0.95	40260181	52129042	0.43102	0.565476	0.369772	1.7788e-12	11.7499	4.89909e-10	9.30988	3.44254	248
3	p21.31	ALS2CL	NM_147129	46710484	46735203	0.504092	0.504372	BRCA	3p	amp	tel	n	1	n	0.95	40260181	52129042	0.43102	0.565476	0.369772	1.7788e-12	11.7499	4.89909e-10	9.30988	3.44254	248
3	p21.31	TMIE	NM_147196	46742822	46752413	0.504458	0.504567	BRCA	3p	amp	tel	n	1	n	0.95	40260181	52129042	0.43102	0.565476	0.369772	1.7788e-12	11.7499	4.89909e-10	9.30988	3.44254	248
3	p21.31	PRSS50	NM_013270	46753605	46759373	0.504581	0.504646	BRCA	3p	amp	tel	n	1	n	0.95	40260181	52129042	0.43102	0.565476	0.369772	1.7788e-12	11.7499	4.89909e-10	9.30988	3.44254	248
3	p21.31	PRSS46P	NR_147121	46761072	46777917	0.504665	0.504856	BRCA	3p	amp	tel	n	1	n	0.95	40260181	52129042	0.43102	0.565476	0.369772	1.7788e-12	11.7499	4.89909e-10	9.30988	3.44254	248
3	p21.31	PRSS45	NM_199183	46783580	46786245	0.50492	0.50495	BRCA	3p	amp	tel	n	1	n	0.95	40260181	52129042	0.43102	0.565476	0.369772	1.7788e-12	11.7499	4.89909e-10	9.30988	3.44254	248
3	p21.31	PRSS42	NM_182702	46871032	46875585	0.505911	0.505962	BRCA	3p	amp	tel	n	1	n	0.95	40260181	52129042	0.43102	0.565476	0.369772	1.7788e-12	11.7499	4.89909e-10	9.30988	3.44254	248
3	p21.31	MYL3	NM_000258	46899356	46904973	0.506232	0.506295	BRCA	3p	amp	tel	n	1	n	0.95	40260181	52129042	0.43102	0.565476	0.369772	1.7788e-12	11.7499	4.89909e-10	9.30988	3.44254	248
3	p21.31	PTH1R	NM_000316	46919235	46945289	0.506457	0.506752	BRCA	3p	amp	tel	n	1	n	0.95	40260181	52129042	0.43102	0.565476	0.369772	1.7788e-12	11.7499	4.89909e-10	9.30988	3.44254	248
3	p21.31	CCDC12	NM_144716	46963219	47023500	0.506955	0.507638	BRCA	3p	amp	tel	n	1	n	0.95	40260181	52129042	0.43102	0.565476	0.369772	1.7788e-12	11.7499	4.89909e-10	9.30988	3.44254	248
3	p21.31	NBEAL2	NM_015175	47021172	47051194	0.507612	0.507952	BRCA	3p	amp	tel	n	1	n	0.95	40260181	52129042	0.43102	0.565476	0.369772	1.7788e-12	11.7499	4.89909e-10	9.30988	3.44254	248
3	p21.31	NRADDP	NR_024046	47053031	47054957	0.507973	0.507994	BRCA	3p	amp	tel	n	1	n	0.95	40260181	52129042	0.43102	0.565476	0.369772	1.7788e-12	11.7499	4.89909e-10	9.30988	3.44254	248
3	p21.31	SETD2	NR_146158	47057897	47205467	0.508028	0.509699	BRCA	3p	amp	tel	n	1	n	0.95	40260181	52129042	0.43102	0.565476	0.369772	1.7788e-12	11.7499	4.89909e-10	9.30988	3.44254	248
3	p21.31	KIF9-AS1	NR_033373	47205859	47285606	0.509704	0.510607	BRCA	3p	amp	tel	n	1	n	0.95	40260181	52129042	0.43102	0.565476	0.369772	1.7788e-12	11.7499	4.89909e-10	9.30988	3.44254	248
3	p21.31	KIF9	NM_022342	47269515	47324337	0.510425	0.511046	BRCA	3p	amp	tel	n	1	n	0.95	40260181	52129042	0.43102	0.565476	0.369772	1.7788e-12	11.7499	4.89909e-10	9.30988	3.44254	248
3	p21.31	SNORD13J	NR_145712	47292008	47292099	0.51068	0.510681	BRCA	3p	amp	tel	n	1	n	0.95	40260181	52129042	0.43102	0.565476	0.369772	1.7788e-12	11.7499	4.89909e-10	9.30988	3.44254	248
3	p21.31	KLHL18	NM_025010	47324329	47388306	0.511046	0.511771	BRCA	3p	amp	tel	n	1	n	0.95	40260181	52129042	0.43102	0.565476	0.369772	1.7788e-12	11.7499	4.89909e-10	9.30988	3.44254	248
3	p21.31	PTPN23	NM_001304482	47422471	47454931	0.512158	0.512525	BRCA	3p	amp	tel	n	1	n	0.95	40260181	52129042	0.43102	0.565476	0.369772	1.7788e-12	11.7499	4.89909e-10	9.30988	3.44254	248
3	p21.31	SCAP	NM_001320044	47455174	47517449	0.512528	0.513234	BRCA	3p	amp	tel	n	1	n	0.95	40260181	52129042	0.43102	0.565476	0.369772	1.7788e-12	11.7499	4.89909e-10	9.30988	3.44254	248
3	p21.31	ELP6	NM_001031703	47537129	47555199	0.513457	0.513661	BRCA	3p	amp	tel	n	1	n	0.95	40260181	52129042	0.43102	0.565476	0.369772	1.7788e-12	11.7499	4.89909e-10	9.30988	3.44254	248
3	p21.31	CSPG5	NM_001206945	47603727	47621730	0.514211	0.514415	BRCA	3p	amp	tel	n	1	n	0.95	40260181	52129042	0.43102	0.565476	0.369772	1.7788e-12	11.7499	4.89909e-10	9.30988	3.44254	248
3	p21.31	SMARCC1	NM_003074	47627377	47823405	0.514479	0.5167	BRCA	3p	amp	tel	n	1	n	0.95	40260181	52129042	0.43102	0.565476	0.369772	1.7788e-12	11.7499	4.89909e-10	9.30988	3.44254	248
3	p21.31	SNORD146	NR_145791	47703054	47703184	0.515336	0.515338	BRCA	3p	amp	tel	n	1	n	0.95	40260181	52129042	0.43102	0.565476	0.369772	1.7788e-12	11.7499	4.89909e-10	9.30988	3.44254	248
3	p21.31	DHX30	NM_001330990	47844398	47891686	0.516938	0.517473	BRCA	3p	amp	tel	n	1	n	0.95	40260181	52129042	0.43102	0.565476	0.369772	1.7788e-12	11.7499	4.89909e-10	9.30988	3.44254	248
3	p21.31	MIR1226	NR_031595	47891044	47891119	0.517466	0.517467	BRCA	3p	amp	tel	n	1	n	0.95	40260181	52129042	0.43102	0.565476	0.369772	1.7788e-12	11.7499	4.89909e-10	9.30988	3.44254	248
3	p21.31	MAP4	NM_002375	47892179	48130769	0.517479	0.520182	BRCA	3p	amp	tel	n	1	n	0.95	40260181	52129042	0.43102	0.565476	0.369772	1.7788e-12	11.7499	4.89909e-10	9.30988	3.44254	248
3	p21.31	CDC25A	NM_201567	48198667	48229801	0.520951	0.521304	BRCA	3p	amp	tel	n	1	n	0.95	40260181	52129042	0.43102	0.565476	0.369772	1.7788e-12	11.7499	4.89909e-10	9.30988	3.44254	248
3	p21.31	MIR4443	NR_039645	48238053	48238106	0.521397	0.521398	BRCA	3p	amp	tel	n	1	n	0.95	40260181	52129042	0.43102	0.565476	0.369772	1.7788e-12	11.7499	4.89909e-10	9.30988	3.44254	248
3	p21.31	CAMP	NM_004345	48264836	48266981	0.5217	0.521725	BRCA	3p	amp	tel	n	1	n	0.95	40260181	52129042	0.43102	0.565476	0.369772	1.7788e-12	11.7499	4.89909e-10	9.30988	3.44254	248
3	p21.31	ZNF589	NM_016089	48282595	48312479	0.521902	0.52224	BRCA	3p	amp	tel	n	1	n	0.95	40260181	52129042	0.43102	0.565476	0.369772	1.7788e-12	11.7499	4.89909e-10	9.30988	3.44254	248
3	p21.31	FCF1P2	NR_134638	48331768	48333168	0.522459	0.522475	BRCA	3p	amp	tel	n	1	n	0.95	40260181	52129042	0.43102	0.565476	0.369772	1.7788e-12	11.7499	4.89909e-10	9.30988	3.44254	248
3	p21.31	NME6	NM_001308435	48333806	48343175	0.522482	0.522588	BRCA	3p	amp	tel	n	1	n	0.95	40260181	52129042	0.43102	0.565476	0.369772	1.7788e-12	11.7499	4.89909e-10	9.30988	3.44254	248
3	p21.31	SPINK8	NM_001080525	48348335	48369831	0.522646	0.52289	BRCA	3p	amp	tel	n	1	n	0.95	40260181	52129042	0.43102	0.565476	0.369772	1.7788e-12	11.7499	4.89909e-10	9.30988	3.44254	248
3	p21.31	MIR2115	NR_031749	48357849	48357949	0.522754	0.522755	BRCA	3p	amp	tel	n	1	n	0.95	40260181	52129042	0.43102	0.565476	0.369772	1.7788e-12	11.7499	4.89909e-10	9.30988	3.44254	248
3	p21.31	FBXW12	NM_001159929	48413708	48436190	0.523387	0.523642	BRCA	3p	amp	tel	n	1	n	0.95	40260181	52129042	0.43102	0.565476	0.369772	1.7788e-12	11.7499	4.89909e-10	9.30988	3.44254	248
3	p21.31	PLXNB1	NM_001130082	48445260	48471460	0.523744	0.524041	BRCA	3p	amp	tel	n	1	n	0.95	40260181	52129042	0.43102	0.565476	0.369772	1.7788e-12	11.7499	4.89909e-10	9.30988	3.44254	248
3	p21.31	CCDC51	NM_024661	48473579	48481529	0.524065	0.524155	BRCA	3p	amp	tel	n	1	n	0.95	40260181	52129042	0.43102	0.565476	0.369772	1.7788e-12	11.7499	4.89909e-10	9.30988	3.44254	248
3	p21.31	TMA7	NM_015933	48481647	48485616	0.524157	0.524202	BRCA	3p	amp	tel	n	1	n	0.95	40260181	52129042	0.43102	0.565476	0.369772	1.7788e-12	11.7499	4.89909e-10	9.30988	3.44254	248
3	p21.31	ATRIP	NM_001271022	48488113	48507054	0.52423	0.524444	BRCA	3p	amp	tel	n	1	n	0.95	40260181	52129042	0.43102	0.565476	0.369772	1.7788e-12	11.7499	4.89909e-10	9.30988	3.44254	248
3	p21.31	TREX1	NM_007248	48506918	48509044	0.524443	0.524467	BRCA	3p	amp	tel	n	1	n	0.95	40260181	52129042	0.43102	0.565476	0.369772	1.7788e-12	11.7499	4.89909e-10	9.30988	3.44254	248
3	p21.31	SHISA5	NM_001272066	48509196	48542259	0.524469	0.524843	BRCA	3p	amp	tel	n	1	n	0.95	40260181	52129042	0.43102	0.565476	0.369772	1.7788e-12	11.7499	4.89909e-10	9.30988	3.44254	248
3	p21.31	PFKFB4	NM_001317136	48555116	48598613	0.524989	0.525482	BRCA	3p	amp	tel	n	1	n	0.95	40260181	52129042	0.43102	0.565476	0.369772	1.7788e-12	11.7499	4.89909e-10	9.30988	3.44254	248
3	p21.31	MIR6823	NR_106881	48587393	48587454	0.525354	0.525355	BRCA	3p	amp	tel	n	1	n	0.95	40260181	52129042	0.43102	0.565476	0.369772	1.7788e-12	11.7499	4.89909e-10	9.30988	3.44254	248
3	p21.31	UCN2	NM_033199	48599150	48601201	0.525488	0.525511	BRCA	3p	amp	tel	n	1	n	0.95	40260181	52129042	0.43102	0.565476	0.369772	1.7788e-12	11.7499	4.89909e-10	9.30988	3.44254	248
3	p21.31	COL7A1	NM_000094	48601505	48632593	0.525514	0.525867	BRCA	3p	amp	tel	n	1	n	0.95	40260181	52129042	0.43102	0.565476	0.369772	1.7788e-12	11.7499	4.89909e-10	9.30988	3.44254	248
3	p21.31	MIR711	NR_031756	48616334	48616410	0.525682	0.525683	BRCA	3p	amp	tel	n	1	n	0.95	40260181	52129042	0.43102	0.565476	0.369772	1.7788e-12	11.7499	4.89909e-10	9.30988	3.44254	248
3	p21.31	UQCRC1	NM_003365	48636431	48647098	0.52591	0.526031	BRCA	3p	amp	tel	n	1	n	0.95	40260181	52129042	0.43102	0.565476	0.369772	1.7788e-12	11.7499	4.89909e-10	9.30988	3.44254	248
3	p21.31	SNORA94	NR_132776	48642352	48642583	0.525977	0.52598	BRCA	3p	amp	tel	n	1	n	0.95	40260181	52129042	0.43102	0.565476	0.369772	1.7788e-12	11.7499	4.89909e-10	9.30988	3.44254	248
3	p21.31	TMEM89	NM_001008269	48658191	48659288	0.526157	0.526169	BRCA	3p	amp	tel	n	1	n	0.95	40260181	52129042	0.43102	0.565476	0.369772	1.7788e-12	11.7499	4.89909e-10	9.30988	3.44254	248
3	p21.31	SLC26A6	NM_001281733	48663155	48672926	0.526213	0.526323	BRCA	3p	amp	tel	n	1	n	0.95	40260181	52129042	0.43102	0.565476	0.369772	1.7788e-12	11.7499	4.89909e-10	9.30988	3.44254	248
3	p21.31	MIR6824	NR_106882	48671068	48671131	0.526302	0.526303	BRCA	3p	amp	tel	n	1	n	0.95	40260181	52129042	0.43102	0.565476	0.369772	1.7788e-12	11.7499	4.89909e-10	9.30988	3.44254	248
3	p21.31	CELSR3	NM_001407	48673895	48700348	0.526334	0.526634	BRCA	3p	amp	tel	n	1	n	0.95	40260181	52129042	0.43102	0.565476	0.369772	1.7788e-12	11.7499	4.89909e-10	9.30988	3.44254	248
3	p21.31	MIR4793	NR_039956	48681626	48681713	0.526422	0.526423	BRCA	3p	amp	tel	n	1	n	0.95	40260181	52129042	0.43102	0.565476	0.369772	1.7788e-12	11.7499	4.89909e-10	9.30988	3.44254	248
3	p21.31	CELSR3-AS1	NR_111921	48701200	48706603	0.526644	0.526705	BRCA	3p	amp	tel	n	1	n	0.95	40260181	52129042	0.43102	0.565476	0.369772	1.7788e-12	11.7499	4.89909e-10	9.30988	3.44254	248
3	p21.31	NCKIPSD	NM_016453	48711271	48723366	0.526758	0.526895	BRCA	3p	amp	tel	n	1	n	0.95	40260181	52129042	0.43102	0.565476	0.369772	1.7788e-12	11.7499	4.89909e-10	9.30988	3.44254	248
3	p21.31	IP6K2	NM_016291	48725435	48754711	0.526918	0.52725	BRCA	3p	amp	tel	n	1	n	0.95	40260181	52129042	0.43102	0.565476	0.369772	1.7788e-12	11.7499	4.89909e-10	9.30988	3.44254	248
3	p21.31	PRKAR2A	NM_004157	48784011	48885283	0.527582	0.528729	BRCA	3p	amp	tel	n	1	n	0.95	40260181	52129042	0.43102	0.565476	0.369772	1.7788e-12	11.7499	4.89909e-10	9.30988	3.44254	248
3	p21.31	PRKAR2A-AS1	NR_109996	48885369	48889415	0.52873	0.528776	BRCA	3p	amp	tel	n	1	n	0.95	40260181	52129042	0.43102	0.565476	0.369772	1.7788e-12	11.7499	4.89909e-10	9.30988	3.44254	248
3	p21.31	SLC25A20	NM_000387	48894355	48936426	0.528832	0.529308	BRCA	3p	amp	tel	n	1	n	0.95	40260181	52129042	0.43102	0.565476	0.369772	1.7788e-12	11.7499	4.89909e-10	9.30988	3.44254	248
3	p21.31	ARIH2OS	NM_001123040	48955220	48956818	0.529521	0.52954	BRCA	3p	amp	tel	n	1	n	0.95	40260181	52129042	0.43102	0.565476	0.369772	1.7788e-12	11.7499	4.89909e-10	9.30988	3.44254	248
3	p21.31	ARIH2	NM_001349224	48956252	49022971	0.529533	0.530289	BRCA	3p	amp	tel	n	1	n	0.95	40260181	52129042	0.43102	0.565476	0.369772	1.7788e-12	11.7499	4.89909e-10	9.30988	3.44254	248
3	p21.31	P4HTM	NM_177939	49027340	49044581	0.530338	0.530534	BRCA	3p	amp	tel	n	1	n	0.95	40260181	52129042	0.43102	0.565476	0.369772	1.7788e-12	11.7499	4.89909e-10	9.30988	3.44254	248
3	p21.31	WDR6	NM_001320546	49044494	49053386	0.530533	0.530633	BRCA	3p	amp	tel	n	1	n	0.95	40260181	52129042	0.43102	0.565476	0.369772	1.7788e-12	11.7499	4.89909e-10	9.30988	3.44254	248
3	p21.31	DALRD3	NM_018114	49052920	49058504	0.530628	0.530691	BRCA	3p	amp	tel	n	1	n	0.95	40260181	52129042	0.43102	0.565476	0.369772	1.7788e-12	11.7499	4.89909e-10	9.30988	3.44254	248
3	p21.31	MIR425	NR_029948	49057580	49057667	0.530681	0.530682	BRCA	3p	amp	tel	n	1	n	0.95	40260181	52129042	0.43102	0.565476	0.369772	1.7788e-12	11.7499	4.89909e-10	9.30988	3.44254	248
3	p21.31	NDUFAF3	NM_199074	49057907	49060926	0.530685	0.530719	BRCA	3p	amp	tel	n	1	n	0.95	40260181	52129042	0.43102	0.565476	0.369772	1.7788e-12	11.7499	4.89909e-10	9.30988	3.44254	248
3	p21.31	MIR191	NR_029690	49058050	49058142	0.530686	0.530687	BRCA	3p	amp	tel	n	1	n	0.95	40260181	52129042	0.43102	0.565476	0.369772	1.7788e-12	11.7499	4.89909e-10	9.30988	3.44254	248
3	p21.31	IMPDH2	NM_000884	49061761	49066875	0.530728	0.530786	BRCA	3p	amp	tel	n	1	n	0.95	40260181	52129042	0.43102	0.565476	0.369772	1.7788e-12	11.7499	4.89909e-10	9.30988	3.44254	248
3	p21.31	QRICH1	NM_198880	49067139	49131806	0.530789	0.531522	BRCA	3p	amp	tel	n	1	n	0.95	40260181	52129042	0.43102	0.565476	0.369772	1.7788e-12	11.7499	4.89909e-10	9.30988	3.44254	248
3	p21.31	QARS	NM_001272073	49133364	49142562	0.531539	0.531644	BRCA	3p	amp	tel	n	1	n	0.95	40260181	52129042	0.43102	0.565476	0.369772	1.7788e-12	11.7499	4.89909e-10	9.30988	3.44254	248
3	p21.31	MIR6890	NR_106950	49137286	49137347	0.531584	0.531585	BRCA	3p	amp	tel	n	1	n	0.95	40260181	52129042	0.43102	0.565476	0.369772	1.7788e-12	11.7499	4.89909e-10	9.30988	3.44254	248
3	p21.31	USP19	NM_001351101	49145478	49158371	0.531677	0.531823	BRCA	3p	amp	tel	n	1	n	0.95	40260181	52129042	0.43102	0.565476	0.369772	1.7788e-12	11.7499	4.89909e-10	9.30988	3.44254	248
3	p21.31	LAMB2	NM_002292	49158546	49170599	0.531825	0.531961	BRCA	3p	amp	tel	n	1	n	0.95	40260181	52129042	0.43102	0.565476	0.369772	1.7788e-12	11.7499	4.89909e-10	9.30988	3.44254	248
3	p21.31	LAMB2P1	NR_004405	49190291	49191834	0.532184	0.532202	BRCA	3p	amp	tel	n	1	n	0.95	40260181	52129042	0.43102	0.565476	0.369772	1.7788e-12	11.7499	4.89909e-10	9.30988	3.44254	248
3	p21.31	CCDC71	NM_022903	49199967	49203785	0.532294	0.532337	BRCA	3p	amp	tel	n	1	n	0.95	40260181	52129042	0.43102	0.565476	0.369772	1.7788e-12	11.7499	4.89909e-10	9.30988	3.44254	248
3	p21.31	KLHDC8B	NM_173546	49209017	49213919	0.532397	0.532452	BRCA	3p	amp	tel	n	1	n	0.95	40260181	52129042	0.43102	0.565476	0.369772	1.7788e-12	11.7499	4.89909e-10	9.30988	3.44254	248
3	p21.31	C3orf84	NM_001080528	49215068	49229291	0.532465	0.532626	BRCA	3p	amp	tel	n	1	n	0.95	40260181	52129042	0.43102	0.565476	0.369772	1.7788e-12	11.7499	4.89909e-10	9.30988	3.44254	248
3	p21.31	CCDC36	NM_178173	49235860	49295537	0.532701	0.533377	BRCA	3p	amp	tel	n	1	n	0.95	40260181	52129042	0.43102	0.565476	0.369772	1.7788e-12	11.7499	4.89909e-10	9.30988	3.44254	248
3	p21.31	C3orf62	NM_198562	49306029	49314508	0.533496	0.533592	BRCA	3p	amp	tel	n	1	n	0.95	40260181	52129042	0.43102	0.565476	0.369772	1.7788e-12	11.7499	4.89909e-10	9.30988	3.44254	248
3	p21.31	MIR4271	NR_036233	49311552	49311619	0.533558	0.533559	BRCA	3p	amp	tel	n	1	n	0.95	40260181	52129042	0.43102	0.565476	0.369772	1.7788e-12	11.7499	4.89909e-10	9.30988	3.44254	248
3	p21.31	USP4	NM_003363	49314576	49377536	0.533592	0.534306	BRCA	3p	amp	tel	n	1	n	0.95	40260181	52129042	0.43102	0.565476	0.369772	1.7788e-12	11.7499	4.89909e-10	9.30988	3.44254	248
3	p21.31	GPX1	NM_001329455	49394603	49396033	0.534499	0.534515	BRCA	3p	amp	tel	n	1	n	0.95	40260181	52129042	0.43102	0.565476	0.369772	1.7788e-12	11.7499	4.89909e-10	9.30988	3.44254	248
3	p21.31	RHOA	NM_001313943	49396568	49449530	0.534521	0.535121	BRCA	3p	amp	tel	n	1	n	0.95	40260181	52129042	0.43102	0.565476	0.369772	1.7788e-12	11.7499	4.89909e-10	9.30988	3.44254	248
3	p21.31	TCTA	NM_022171	49449638	49453909	0.535122	0.535171	BRCA	3p	amp	tel	n	1	n	0.95	40260181	52129042	0.43102	0.565476	0.369772	1.7788e-12	11.7499	4.89909e-10	9.30988	3.44254	248
3	p21.31	AMT	NR_028435	49454210	49460111	0.535174	0.535241	BRCA	3p	amp	tel	n	1	n	0.95	40260181	52129042	0.43102	0.565476	0.369772	1.7788e-12	11.7499	4.89909e-10	9.30988	3.44254	248
3	p21.31	NICN1	NM_032316	49459765	49466757	0.535237	0.535316	BRCA	3p	amp	tel	n	1	n	0.95	40260181	52129042	0.43102	0.565476	0.369772	1.7788e-12	11.7499	4.89909e-10	9.30988	3.44254	248
3	p21.31	DAG1	NM_001177643	49506135	49573051	0.535762	0.53652	BRCA	3p	amp	tel	n	1	n	0.95	40260181	52129042	0.43102	0.565476	0.369772	1.7788e-12	11.7499	4.89909e-10	9.30988	3.44254	248
3	p21.31	BSN-AS2	NR_038866	49586738	49591799	0.536676	0.536733	BRCA	3p	amp	tel	n	1	n	0.95	40260181	52129042	0.43102	0.565476	0.369772	1.7788e-12	11.7499	4.89909e-10	9.30988	3.44254	248
3	p21.31	BSN	NM_003458	49591921	49708982	0.536734	0.53806	BRCA	3p	amp	tel	n	1	n	0.95	40260181	52129042	0.43102	0.565476	0.369772	1.7788e-12	11.7499	4.89909e-10	9.30988	3.44254	248
3	p21.31	APEH	NM_001640	49711434	49720934	0.538088	0.538196	BRCA	3p	amp	tel	n	1	n	0.95	40260181	52129042	0.43102	0.565476	0.369772	1.7788e-12	11.7499	4.89909e-10	9.30988	3.44254	248
3	p21.31	MST1	NM_020998	49721379	49726196	0.538201	0.538255	BRCA	3p	amp	tel	n	1	n	0.95	40260181	52129042	0.43102	0.565476	0.369772	1.7788e-12	11.7499	4.89909e-10	9.30988	3.44254	248
3	p21.31	RNF123	NM_022064	49726931	49758962	0.538264	0.538627	BRCA	3p	amp	tel	n	1	n	0.95	40260181	52129042	0.43102	0.565476	0.369772	1.7788e-12	11.7499	4.89909e-10	9.30988	3.44254	248
3	p21.31	AMIGO3	NM_198722	49754266	49757238	0.538573	0.538607	BRCA	3p	amp	tel	n	1	n	0.95	40260181	52129042	0.43102	0.565476	0.369772	1.7788e-12	11.7499	4.89909e-10	9.30988	3.44254	248
3	p21.31	GMPPB	NM_013334	49758908	49761407	0.538626	0.538654	BRCA	3p	amp	tel	n	1	n	0.95	40260181	52129042	0.43102	0.565476	0.369772	1.7788e-12	11.7499	4.89909e-10	9.30988	3.44254	248
3	p21.31	IP6K1	NM_153273	49761727	49823973	0.538658	0.539363	BRCA	3p	amp	tel	n	1	n	0.95	40260181	52129042	0.43102	0.565476	0.369772	1.7788e-12	11.7499	4.89909e-10	9.30988	3.44254	248
3	p21.31	CDHR4	NM_001007540	49828166	49837268	0.539411	0.539514	BRCA	3p	amp	tel	n	1	n	0.95	40260181	52129042	0.43102	0.565476	0.369772	1.7788e-12	11.7499	4.89909e-10	9.30988	3.44254	248
3	p21.31	FAM212A	NM_203370	49840686	49842463	0.539552	0.539572	BRCA	3p	amp	tel	n	1	n	0.95	40260181	52129042	0.43102	0.565476	0.369772	1.7788e-12	11.7499	4.89909e-10	9.30988	3.44254	248
3	p21.31	UBA7	NM_003335	49842637	49851391	0.539574	0.539674	BRCA	3p	amp	tel	n	1	n	0.95	40260181	52129042	0.43102	0.565476	0.369772	1.7788e-12	11.7499	4.89909e-10	9.30988	3.44254	248
3	p21.31	MIR5193	NR_049825	49843569	49843678	0.539585	0.539586	BRCA	3p	amp	tel	n	1	n	0.95	40260181	52129042	0.43102	0.565476	0.369772	1.7788e-12	11.7499	4.89909e-10	9.30988	3.44254	248
3	p21.31	TRAIP	NM_005879	49866027	49893992	0.539839	0.540156	BRCA	3p	amp	tel	n	1	n	0.95	40260181	52129042	0.43102	0.565476	0.369772	1.7788e-12	11.7499	4.89909e-10	9.30988	3.44254	248
3	p21.31	CAMKV	NM_001320147	49895413	49907655	0.540172	0.540311	BRCA	3p	amp	tel	n	1	n	0.95	40260181	52129042	0.43102	0.565476	0.369772	1.7788e-12	11.7499	4.89909e-10	9.30988	3.44254	248
3	p21.31	MST1R	NM_001244937	49924435	49941070	0.540501	0.54069	BRCA	3p	amp	tel	n	1	n	0.95	40260181	52129042	0.43102	0.565476	0.369772	1.7788e-12	11.7499	4.89909e-10	9.30988	3.44254	248
3	p21.31	MON1A	NM_001142501	49946301	49967445	0.540749	0.540988	BRCA	3p	amp	tel	n	1	n	0.95	40260181	52129042	0.43102	0.565476	0.369772	1.7788e-12	11.7499	4.89909e-10	9.30988	3.44254	248
3	p21.31	RBM6	NM_001349193	49977476	50114685	0.541102	0.542656	BRCA	3p	amp	tel	n	1	n	0.95	40260181	52129042	0.43102	0.565476	0.369772	1.7788e-12	11.7499	4.89909e-10	9.30988	3.44254	248
3	p21.31	RBM5	NR_036627	50126340	50156397	0.542788	0.543129	BRCA	3p	amp	tel	n	1	n	0.95	40260181	52129042	0.43102	0.565476	0.369772	1.7788e-12	11.7499	4.89909e-10	9.30988	3.44254	248
3	p21.31	RBM5-AS1	NR_045388	50137035	50138421	0.54291	0.542925	BRCA	3p	amp	tel	n	1	n	0.95	40260181	52129042	0.43102	0.565476	0.369772	1.7788e-12	11.7499	4.89909e-10	9.30988	3.44254	248
3	p21.31	SEMA3F-AS1	NR_135301	50153454	50193518	0.543096	0.543549	BRCA	3p	amp	tel	n	1	n	0.95	40260181	52129042	0.43102	0.565476	0.369772	1.7788e-12	11.7499	4.89909e-10	9.30988	3.44254	248
3	p21.31	SEMA3F	NM_001318798	50192477	50226508	0.543538	0.543923	BRCA	3p	amp	tel	n	1	n	0.95	40260181	52129042	0.43102	0.565476	0.369772	1.7788e-12	11.7499	4.89909e-10	9.30988	3.44254	248
3	p21.31	MIR566	NR_030291	50210758	50210852	0.543745	0.543746	BRCA	3p	amp	tel	n	1	n	0.95	40260181	52129042	0.43102	0.565476	0.369772	1.7788e-12	11.7499	4.89909e-10	9.30988	3.44254	248
3	p21.31	GNAT1	NM_144499	50229042	50235129	0.543952	0.544021	BRCA	3p	amp	tel	n	1	n	0.95	40260181	52129042	0.43102	0.565476	0.369772	1.7788e-12	11.7499	4.89909e-10	9.30988	3.44254	248
3	p21.31	SLC38A3	NM_006841	50242678	50258411	0.544106	0.544285	BRCA	3p	amp	tel	n	1	n	0.95	40260181	52129042	0.43102	0.565476	0.369772	1.7788e-12	11.7499	4.89909e-10	9.30988	3.44254	248
3	p21.31	GNAI2	NM_001282619	50264119	50296786	0.544349	0.544719	BRCA	3p	amp	tel	n	1	n	0.95	40260181	52129042	0.43102	0.565476	0.369772	1.7788e-12	11.7499	4.89909e-10	9.30988	3.44254	248
3	p21.31	MIR5787	NR_106714	50264867	50264922	0.544358	0.544358	BRCA	3p	amp	tel	n	1	n	0.95	40260181	52129042	0.43102	0.565476	0.369772	1.7788e-12	11.7499	4.89909e-10	9.30988	3.44254	248
3	p21.31	SEMA3B-AS1	NR_110702	50304072	50304803	0.544802	0.54481	BRCA	3p	amp	tel	n	1	n	0.95	40260181	52129042	0.43102	0.565476	0.369772	1.7788e-12	11.7499	4.89909e-10	9.30988	3.44254	248
3	p21.31	SEMA3B	NM_004636	50304989	50314602	0.544812	0.544921	BRCA	3p	amp	tel	n	1	n	0.95	40260181	52129042	0.43102	0.565476	0.369772	1.7788e-12	11.7499	4.89909e-10	9.30988	3.44254	248
3	p21.31	MIR6872	NR_106932	50310666	50310728	0.544876	0.544877	BRCA	3p	amp	tel	n	1	n	0.95	40260181	52129042	0.43102	0.565476	0.369772	1.7788e-12	11.7499	4.89909e-10	9.30988	3.44254	248
3	p21.31	LSMEM2	NM_153215	50316457	50325545	0.544942	0.545045	BRCA	3p	amp	tel	n	1	n	0.95	40260181	52129042	0.43102	0.565476	0.369772	1.7788e-12	11.7499	4.89909e-10	9.30988	3.44254	248
3	p21.31	IFRD2	NM_006764	50325162	50330026	0.545041	0.545096	BRCA	3p	amp	tel	n	1	n	0.95	40260181	52129042	0.43102	0.565476	0.369772	1.7788e-12	11.7499	4.89909e-10	9.30988	3.44254	248
3	p21.31	HYAL3	NM_003549	50330258	50336899	0.545098	0.545174	BRCA	3p	amp	tel	n	1	n	0.95	40260181	52129042	0.43102	0.565476	0.369772	1.7788e-12	11.7499	4.89909e-10	9.30988	3.44254	248
3	p21.31	NAT6	NM_012191	50333832	50336852	0.545139	0.545173	BRCA	3p	amp	tel	n	1	n	0.95	40260181	52129042	0.43102	0.565476	0.369772	1.7788e-12	11.7499	4.89909e-10	9.30988	3.44254	248
3	p21.31	HYAL1	NM_153281	50337319	50349812	0.545178	0.54532	BRCA	3p	amp	tel	n	1	n	0.95	40260181	52129042	0.43102	0.565476	0.369772	1.7788e-12	11.7499	4.89909e-10	9.30988	3.44254	248
3	p21.31	HYAL2	NM_003773	50355220	50360281	0.545381	0.545439	BRCA	3p	amp	tel	n	1	n	0.95	40260181	52129042	0.43102	0.565476	0.369772	1.7788e-12	11.7499	4.89909e-10	9.30988	3.44254	248
3	p21.31	TUSC2	NM_007275	50362339	50365669	0.545462	0.5455	BRCA	3p	amp	tel	n	1	n	0.95	40260181	52129042	0.43102	0.565476	0.369772	1.7788e-12	11.7499	4.89909e-10	9.30988	3.44254	248
3	p21.31	RASSF1	NM_007182	50367216	50378367	0.545517	0.545643	BRCA	3p	amp	tel	n	1	n	0.95	40260181	52129042	0.43102	0.565476	0.369772	1.7788e-12	11.7499	4.89909e-10	9.30988	3.44254	248
3	p21.31	RASSF1-AS1	NR_109831	50374941	50375727	0.545605	0.545614	BRCA	3p	amp	tel	n	1	n	0.95	40260181	52129042	0.43102	0.565476	0.369772	1.7788e-12	11.7499	4.89909e-10	9.30988	3.44254	248
3	p21.31	ZMYND10	NM_015896	50378536	50383177	0.545645	0.545698	BRCA	3p	amp	tel	n	1	n	0.95	40260181	52129042	0.43102	0.565476	0.369772	1.7788e-12	11.7499	4.89909e-10	9.30988	3.44254	248
3	p21.31	NPRL2	NM_006545	50384918	50388486	0.545718	0.545758	BRCA	3p	amp	tel	n	1	n	0.95	40260181	52129042	0.43102	0.565476	0.369772	1.7788e-12	11.7499	4.89909e-10	9.30988	3.44254	248
3	p21.31	CYB561D2	NR_111912	50388125	50405628	0.545754	0.545952	BRCA	3p	amp	tel	n	1	n	0.95	40260181	52129042	0.43102	0.565476	0.369772	1.7788e-12	11.7499	4.89909e-10	9.30988	3.44254	248
3	p21.31	TMEM115	NM_007024	50392179	50396939	0.5458	0.545854	BRCA	3p	amp	tel	n	1	n	0.95	40260181	52129042	0.43102	0.565476	0.369772	1.7788e-12	11.7499	4.89909e-10	9.30988	3.44254	248
3	p21.31	CACNA2D2	NM_001291101	50400043	50541675	0.545889	0.547493	BRCA	3p	amp	tel	n	1	n	0.95	40260181	52129042	0.43102	0.565476	0.369772	1.7788e-12	11.7499	4.89909e-10	9.30988	3.44254	248
3	p21.2	C3orf18	NM_001171741	50595455	50608458	0.548103	0.54825	BRCA	3p	amp	tel	n	1	n	0.95	40260181	52129042	0.43102	0.565476	0.369772	1.7788e-12	11.7499	4.89909e-10	9.30988	3.44254	248
3	p21.2	HEMK1	NM_001317851	50606582	50622421	0.548229	0.548408	BRCA	3p	amp	tel	n	1	n	0.95	40260181	52129042	0.43102	0.565476	0.369772	1.7788e-12	11.7499	4.89909e-10	9.30988	3.44254	248
3	p21.2	CISH	NM_145071	50643884	50649262	0.548651	0.548712	BRCA	3p	amp	tel	n	1	n	0.95	40260181	52129042	0.43102	0.565476	0.369772	1.7788e-12	11.7499	4.89909e-10	9.30988	3.44254	248
3	p21.2	MAPKAPK3	NM_001243926	50649292	50686728	0.548713	0.549137	BRCA	3p	amp	tel	n	1	n	0.95	40260181	52129042	0.43102	0.565476	0.369772	1.7788e-12	11.7499	4.89909e-10	9.30988	3.44254	248
3	p21.2	MIR4787	NR_039950	50712510	50712594	0.549429	0.54943	BRCA	3p	amp	tel	n	1	n	0.95	40260181	52129042	0.43102	0.565476	0.369772	1.7788e-12	11.7499	4.89909e-10	9.30988	3.44254	248
3	p21.2	DOCK3	NM_004947	50712671	51421629	0.549431	0.557462	BRCA	3p	amp	tel	n	1	n	0.95	40260181	52129042	0.43102	0.565476	0.369772	1.7788e-12	11.7499	4.89909e-10	9.30988	3.44254	248
3	p21.2	MANF	NM_006010	51422667	51426828	0.557474	0.557521	BRCA	3p	amp	tel	n	1	n	0.95	40260181	52129042	0.43102	0.565476	0.369772	1.7788e-12	11.7499	4.89909e-10	9.30988	3.44254	248
3	p21.2	RBM15B	NM_013286	51428698	51435336	0.557542	0.557617	BRCA	3p	amp	tel	n	1	n	0.95	40260181	52129042	0.43102	0.565476	0.369772	1.7788e-12	11.7499	4.89909e-10	9.30988	3.44254	248
3	p21.2	DCAF1	NM_001171904	51433297	51534018	0.557594	0.558735	BRCA	3p	amp	tel	n	1	n	0.95	40260181	52129042	0.43102	0.565476	0.369772	1.7788e-12	11.7499	4.89909e-10	9.30988	3.44254	248
3	p21.2	RAD54L2	NM_001322256	51572698	51702676	0.559173	0.560646	BRCA	3p	amp	tel	n	1	n	0.95	40260181	52129042	0.43102	0.565476	0.369772	1.7788e-12	11.7499	4.89909e-10	9.30988	3.44254	248
3	p21.2	TEX264	NM_015926	51705190	51738339	0.560674	0.56105	BRCA	3p	amp	tel	n	1	n	0.95	40260181	52129042	0.43102	0.565476	0.369772	1.7788e-12	11.7499	4.89909e-10	9.30988	3.44254	248
3	p21.2	GRM2	NM_001349117	51741048	51752625	0.56108	0.561212	BRCA	3p	amp	tel	n	1	n	0.95	40260181	52129042	0.43102	0.565476	0.369772	1.7788e-12	11.7499	4.89909e-10	9.30988	3.44254	248
3	p21.2	IQCF6	NM_001143833	51812576	51813203	0.561891	0.561898	BRCA	3p	amp	tel	n	1	n	0.95	40260181	52129042	0.43102	0.565476	0.369772	1.7788e-12	11.7499	4.89909e-10	9.30988	3.44254	248
3	p21.2	IQCF4	NR_038213	51851618	51853651	0.562333	0.562356	BRCA	3p	amp	tel	n	1	n	0.95	40260181	52129042	0.43102	0.565476	0.369772	1.7788e-12	11.7499	4.89909e-10	9.30988	3.44254	248
3	p21.2	IQCF3	NM_001207023	51860898	51864874	0.562438	0.562483	BRCA	3p	amp	tel	n	1	n	0.95	40260181	52129042	0.43102	0.565476	0.369772	1.7788e-12	11.7499	4.89909e-10	9.30988	3.44254	248
3	p21.2	IQCF2	NM_203424	51895644	51897440	0.562832	0.562852	BRCA	3p	amp	tel	n	1	n	0.95	40260181	52129042	0.43102	0.565476	0.369772	1.7788e-12	11.7499	4.89909e-10	9.30988	3.44254	248
3	p21.2	IQCF5-AS1	NR_109984	51907611	51909783	0.562967	0.562992	BRCA	3p	amp	tel	n	1	n	0.95	40260181	52129042	0.43102	0.565476	0.369772	1.7788e-12	11.7499	4.89909e-10	9.30988	3.44254	248
3	p21.2	IQCF5	NM_001145059	51907736	51909600	0.562969	0.56299	BRCA	3p	amp	tel	n	1	n	0.95	40260181	52129042	0.43102	0.565476	0.369772	1.7788e-12	11.7499	4.89909e-10	9.30988	3.44254	248
3	p21.2	IQCF1	NM_152397	51928891	51937386	0.563208	0.563305	BRCA	3p	amp	tel	n	1	n	0.95	40260181	52129042	0.43102	0.565476	0.369772	1.7788e-12	11.7499	4.89909e-10	9.30988	3.44254	248
3	p21.2	RRP9	NM_004704	51967441	51975957	0.563645	0.563742	BRCA	3p	amp	tel	n	1	n	0.95	40260181	52129042	0.43102	0.565476	0.369772	1.7788e-12	11.7499	4.89909e-10	9.30988	3.44254	248
3	p21.2	PARP3	NM_005485	51976320	51982883	0.563746	0.56382	BRCA	3p	amp	tel	n	1	n	0.95	40260181	52129042	0.43102	0.565476	0.369772	1.7788e-12	11.7499	4.89909e-10	9.30988	3.44254	248
3	p21.2	GPR62	NM_080865	51989329	51991520	0.563893	0.563918	BRCA	3p	amp	tel	n	1	n	0.95	40260181	52129042	0.43102	0.565476	0.369772	1.7788e-12	11.7499	4.89909e-10	9.30988	3.44254	248
3	p21.2	PCBP4	NM_001174100	51991469	52001482	0.563917	0.564031	BRCA	3p	amp	tel	n	1	n	0.95	40260181	52129042	0.43102	0.565476	0.369772	1.7788e-12	11.7499	4.89909e-10	9.30988	3.44254	248
3	p21.2	ABHD14B	NM_001254753	52002525	52008646	0.564043	0.564112	BRCA	3p	amp	tel	n	1	n	0.95	40260181	52129042	0.43102	0.565476	0.369772	1.7788e-12	11.7499	4.89909e-10	9.30988	3.44254	248
3	p21.2	ABHD14A	NM_015407	52009041	52015216	0.564116	0.564186	BRCA	3p	amp	tel	n	1	n	0.95	40260181	52129042	0.43102	0.565476	0.369772	1.7788e-12	11.7499	4.89909e-10	9.30988	3.44254	248
3	p21.2	ABHD14A-ACY1	NM_001316331	52009041	52023218	0.564116	0.564277	BRCA	3p	amp	tel	n	1	n	0.95	40260181	52129042	0.43102	0.565476	0.369772	1.7788e-12	11.7499	4.89909e-10	9.30988	3.44254	248
3	p21.2	ACY1	NM_001198895	52017299	52023218	0.56421	0.564277	BRCA	3p	amp	tel	n	1	n	0.95	40260181	52129042	0.43102	0.565476	0.369772	1.7788e-12	11.7499	4.89909e-10	9.30988	3.44254	248
3	p21.2	RPL29	NM_000992	52027643	52029958	0.564327	0.564353	BRCA	3p	amp	tel	n	1	n	0.95	40260181	52129042	0.43102	0.565476	0.369772	1.7788e-12	11.7499	4.89909e-10	9.30988	3.44254	248
3	p21.2	DUSP7	NM_001947	52082936	52090461	0.564954	0.565039	BRCA	3p	amp	tel	n	1	n	0.95	40260181	52129042	0.43102	0.565476	0.369772	1.7788e-12	11.7499	4.89909e-10	9.30988	3.44254	248
3	p21.2	LINC00696	NR_027331	52096109	52099128	0.565103	0.565137	BRCA	3p	amp	tel	n	1	n	0.95	40260181	52129042	0.43102	0.565476	0.369772	1.7788e-12	11.7499	4.89909e-10	9.30988	3.44254	248
3	p21.2	POC1A	NM_001161581	52109248	52188706	0.565252	0.566152	BRCA	3p	amp	tel	n	1	n	0.95	40260181	52129042	0.43102	0.565476	0.369772	1.7788e-12	11.7499	4.89909e-10	9.30988	3.44254	248
11	q22.3	MIR4693	NR_039842	103720633	103720708	0.389382	0.389381	BRCA	11q	del	tel	p	1	p	0.95	103509476	106106310	0.358846	0.392084	0.235917	5.55112e-16	15.2556	2.2379e-13	12.6502	2.98439	19
11	q22.3	PDGFD	NM_033135	103777913	104035027	0.388649	0.385358	BRCA	11q	del	tel	p	1	p	0.95	103509476	106106310	0.358846	0.392084	0.235917	5.55112e-16	15.2556	2.2379e-13	12.6502	2.98439	19
11	q22.3	DDI1	NM_001001711	103907307	103909922	0.386992	0.386959	BRCA	11q	del	tel	p	1	p	0.95	103509476	106106310	0.358846	0.392084	0.235917	5.55112e-16	15.2556	2.2379e-13	12.6502	2.98439	19
11	q22.3	MIR7641-1	NR_106987	104123318	104123379	0.384228	0.384227	BRCA	11q	del	tel	p	1	p	0.95	103509476	106106310	0.358846	0.392084	0.235917	5.55112e-16	15.2556	2.2379e-13	12.6502	2.98439	19
11	q22.3	LINC02552	NR_120585	104439216	104480030	0.380184	0.379662	BRCA	11q	del	tel	p	1	p	0.95	103509476	106106310	0.358846	0.392084	0.235917	5.55112e-16	15.2556	2.2379e-13	12.6502	2.98439	19
11	q22.3	CASP12	NM_001191016	104756444	104769397	0.376124	0.375958	BRCA	11q	del	tel	p	1	p	0.95	103509476	106106310	0.358846	0.392084	0.235917	5.55112e-16	15.2556	2.2379e-13	12.6502	2.98439	19
11	q22.3	LOC643733	NR_034078	104772275	104788902	0.375921	0.375708	BRCA	11q	del	tel	p	1	p	0.95	103509476	106106310	0.358846	0.392084	0.235917	5.55112e-16	15.2556	2.2379e-13	12.6502	2.98439	19
11	q22.3	CASP4	NM_001225	104813593	104839325	0.375392	0.375063	BRCA	11q	del	tel	p	1	p	0.95	103509476	106106310	0.358846	0.392084	0.235917	5.55112e-16	15.2556	2.2379e-13	12.6502	2.98439	19
11	q22.3	CASP5	NM_001136112	104864961	104893895	0.374735	0.374365	BRCA	11q	del	tel	p	1	p	0.95	103509476	106106310	0.358846	0.392084	0.235917	5.55112e-16	15.2556	2.2379e-13	12.6502	2.98439	19
11	q22.3	CASP1	NM_033293	104896236	104905884	0.374335	0.374211	BRCA	11q	del	tel	p	1	p	0.95	103509476	106106310	0.358846	0.392084	0.235917	5.55112e-16	15.2556	2.2379e-13	12.6502	2.98439	19
11	q22.3	CARD16	NM_052889	104912052	104916051	0.374132	0.374081	BRCA	11q	del	tel	p	1	p	0.95	103509476	106106310	0.358846	0.392084	0.235917	5.55112e-16	15.2556	2.2379e-13	12.6502	2.98439	19
11	q22.3	CASP1P2	NR_131905	104933328	104942257	0.37386	0.373746	BRCA	11q	del	tel	p	1	p	0.95	103509476	106106310	0.358846	0.392084	0.235917	5.55112e-16	15.2556	2.2379e-13	12.6502	2.98439	19
11	q22.3	CARD17	NM_001007232	104963195	104972158	0.373478	0.373363	BRCA	11q	del	tel	p	1	p	0.95	103509476	106106310	0.358846	0.392084	0.235917	5.55112e-16	15.2556	2.2379e-13	12.6502	2.98439	19
11	q22.3	CARD18	NM_021571	105008447	105010461	0.372898	0.372873	BRCA	11q	del	tel	p	1	p	0.95	103509476	106106310	0.358846	0.392084	0.235917	5.55112e-16	15.2556	2.2379e-13	12.6502	2.98439	19
11	q22.3	GRIA4	NM_001077243	105480799	105852819	0.366853	0.362091	BRCA	11q	del	tel	p	1	p	0.95	103509476	106106310	0.358846	0.392084	0.235917	5.55112e-16	15.2556	2.2379e-13	12.6502	2.98439	19
11	q22.3	MSANTD4	NM_001318750	105878647	105893014	0.36176	0.361577	BRCA	11q	del	tel	p	1	p	0.95	103509476	106106310	0.358846	0.392084	0.235917	5.55112e-16	15.2556	2.2379e-13	12.6502	2.98439	19
11	q22.3	KBTBD3	NM_001330359	105921824	105948465	0.361208	0.360867	BRCA	11q	del	tel	p	1	p	0.95	103509476	106106310	0.358846	0.392084	0.235917	5.55112e-16	15.2556	2.2379e-13	12.6502	2.98439	19
11	q22.3	AASDHPPT	NM_015423	105948291	105969419	0.360869	0.360599	BRCA	11q	del	tel	p	1	p	0.95	103509476	106106310	0.358846	0.392084	0.235917	5.55112e-16	15.2556	2.2379e-13	12.6502	2.98439	19
11	q22.3	LOC105369473	NR_135099	105983185	106002843	0.360422	0.360171	BRCA	11q	del	tel	p	1	p	0.95	103509476	106106310	0.358846	0.392084	0.235917	5.55112e-16	15.2556	2.2379e-13	12.6502	2.98439	19
8	p11.23	ZNF703	NM_025069	37553268	37557539	0.872858	0.872959	BRCA	8p	del	tel	n	2	p-rn	0.95	37469998	38118376	0.87089	0.886213	0.232546	2.22045e-15	14.6536	8.19904e-13	12.0862	2.8106	17
8	p11.23	LOC101929622	NR_125820	37575096	37591011	0.873374	0.87375	BRCA	8p	del	tel	n	2	p-rn	0.95	37469998	38118376	0.87089	0.886213	0.232546	2.22045e-15	14.6536	8.19904e-13	12.0862	2.8106	17
8	p11.23	LOC102723701	NR_125821	37592278	37594944	0.87378	0.873843	BRCA	8p	del	tel	n	2	p-rn	0.95	37469998	38118376	0.87089	0.886213	0.232546	2.22045e-15	14.6536	8.19904e-13	12.0862	2.8106	17
8	p11.23	ERLIN2	NM_007175	37594096	37615319	0.873823	0.874324	BRCA	8p	del	tel	n	2	p-rn	0.95	37469998	38118376	0.87089	0.886213	0.232546	2.22045e-15	14.6536	8.19904e-13	12.0862	2.8106	17
8	p11.23	LOC728024	NR_003671	37604073	37605564	0.874059	0.874094	BRCA	8p	del	tel	n	2	p-rn	0.95	37469998	38118376	0.87089	0.886213	0.232546	2.22045e-15	14.6536	8.19904e-13	12.0862	2.8106	17
8	p11.23	PLPBP	NM_001349347	37620100	37637286	0.874437	0.874843	BRCA	8p	del	tel	n	2	p-rn	0.95	37469998	38118376	0.87089	0.886213	0.232546	2.22045e-15	14.6536	8.19904e-13	12.0862	2.8106	17
8	p11.23	ADGRA2	NM_032777	37654400	37701504	0.875248	0.876361	BRCA	8p	del	tel	n	2	p-rn	0.95	37469998	38118376	0.87089	0.886213	0.232546	2.22045e-15	14.6536	8.19904e-13	12.0862	2.8106	17
8	p11.23	BRF2	NM_018310	37701397	37707431	0.876359	0.876501	BRCA	8p	del	tel	n	2	p-rn	0.95	37469998	38118376	0.87089	0.886213	0.232546	2.22045e-15	14.6536	8.19904e-13	12.0862	2.8106	17
8	p11.23	RAB11FIP1	NM_025151	37716464	37757015	0.876715	0.877673	BRCA	8p	del	tel	n	2	p-rn	0.95	37469998	38118376	0.87089	0.886213	0.232546	2.22045e-15	14.6536	8.19904e-13	12.0862	2.8106	17
8	p11.23	GOT1L1	NM_152413	37791799	37797647	0.878495	0.878633	BRCA	8p	del	tel	n	2	p-rn	0.95	37469998	38118376	0.87089	0.886213	0.232546	2.22045e-15	14.6536	8.19904e-13	12.0862	2.8106	17
8	p11.23	ADRB3	NM_000025	37820513	37824184	0.879173	0.87926	BRCA	8p	del	tel	n	2	p-rn	0.95	37469998	38118376	0.87089	0.886213	0.232546	2.22045e-15	14.6536	8.19904e-13	12.0862	2.8106	17
8	p11.23	EIF4EBP1	NM_004095	37888019	37917883	0.880769	0.881475	BRCA	8p	del	tel	n	2	p-rn	0.95	37469998	38118376	0.87089	0.886213	0.232546	2.22045e-15	14.6536	8.19904e-13	12.0862	2.8106	17
8	p11.23	ASH2L	NM_004674	37963010	37997598	0.882541	0.883358	BRCA	8p	del	tel	n	2	p-rn	0.95	37469998	38118376	0.87089	0.886213	0.232546	2.22045e-15	14.6536	8.19904e-13	12.0862	2.8106	17
8	p11.23	STAR	NM_000349	38000217	38008600	0.88342	0.883618	BRCA	8p	del	tel	n	2	p-rn	0.95	37469998	38118376	0.87089	0.886213	0.232546	2.22045e-15	14.6536	8.19904e-13	12.0862	2.8106	17
8	p11.23	LSM1	NR_045492	38020838	38034248	0.883908	0.884224	BRCA	8p	del	tel	n	2	p-rn	0.95	37469998	38118376	0.87089	0.886213	0.232546	2.22045e-15	14.6536	8.19904e-13	12.0862	2.8106	17
8	p11.23	BAG4	NM_001204878	38034105	38070819	0.884221	0.885089	BRCA	8p	del	tel	n	2	p-rn	0.95	37469998	38118376	0.87089	0.886213	0.232546	2.22045e-15	14.6536	8.19904e-13	12.0862	2.8106	17
8	p11.23	DDHD2	NM_015214	38089008	38120287	0.885519	0.886258	BRCA	8p	del	tel	n	2	p-rn	0.95	37469998	38118376	0.87089	0.886213	0.232546	2.22045e-15	14.6536	8.19904e-13	12.0862	2.8106	17
13	q14.11	VWA8-AS1	NR_039974	42535304	42555701	0.75837	0.758157	BRCA	13	del	tel	p	1	p	0.95	42551567	44962945	0.73296	0.7582	0.364699	1.20765e-09	8.91806	2.28007e-07	6.64205	2.42235	22
13	q14.11	DGKH	NM_001204504	42614171	42817033	0.757545	0.755421	BRCA	13	del	tel	p	1	p	0.95	42551567	44962945	0.73296	0.7582	0.364699	1.20765e-09	8.91806	2.28007e-07	6.64205	2.42235	22
13	q14.11	AKAP11	NM_016248	42846288	42897403	0.755115	0.75458	BRCA	13	del	tel	p	1	p	0.95	42551567	44962945	0.73296	0.7582	0.364699	1.20765e-09	8.91806	2.28007e-07	6.64205	2.42235	22
13	q14.11	LINC02341	NR_135319	42999027	43060092	0.753516	0.752877	BRCA	13	del	tel	p	1	p	0.95	42551567	44962945	0.73296	0.7582	0.364699	1.20765e-09	8.91806	2.28007e-07	6.64205	2.42235	22
13	q14.11	TNFSF11	NM_033012	43136871	43182149	0.752074	0.7516	BRCA	13	del	tel	p	1	p	0.95	42551567	44962945	0.73296	0.7582	0.364699	1.20765e-09	8.91806	2.28007e-07	6.64205	2.42235	22
13	q14.11	FAM216B	NM_001318932	43355685	43365686	0.749783	0.749678	BRCA	13	del	tel	p	1	p	0.95	42551567	44962945	0.73296	0.7582	0.364699	1.20765e-09	8.91806	2.28007e-07	6.64205	2.42235	22
13	q14.11	LINC01050	NR_125747	43384501	43386698	0.749482	0.749459	BRCA	13	del	tel	p	1	p	0.95	42551567	44962945	0.73296	0.7582	0.364699	1.20765e-09	8.91806	2.28007e-07	6.64205	2.42235	22
13	q14.11	LINC00428	NR_126389	43416547	43446880	0.749146	0.748829	BRCA	13	del	tel	p	1	p	0.95	42551567	44962945	0.73296	0.7582	0.364699	1.20765e-09	8.91806	2.28007e-07	6.64205	2.42235	22
13	q14.11	EPSTI1	NM_033255	43460523	43566448	0.748686	0.747577	BRCA	13	del	tel	p	1	p	0.95	42551567	44962945	0.73296	0.7582	0.364699	1.20765e-09	8.91806	2.28007e-07	6.64205	2.42235	22
13	q14.11	DNAJC15	NM_013238	43597361	43683306	0.747253	0.746354	BRCA	13	del	tel	p	1	p	0.95	42551567	44962945	0.73296	0.7582	0.364699	1.20765e-09	8.91806	2.28007e-07	6.64205	2.42235	22
13	q14.11	LINC00400	NR_047013	43687300	43733602	0.746312	0.745827	BRCA	13	del	tel	p	1	p	0.95	42551567	44962945	0.73296	0.7582	0.364699	1.20765e-09	8.91806	2.28007e-07	6.64205	2.42235	22
13	q14.11	ENOX1	NM_017993	43787268	44361116	0.745266	0.739259	BRCA	13	del	tel	p	1	p	0.95	42551567	44962945	0.73296	0.7582	0.364699	1.20765e-09	8.91806	2.28007e-07	6.64205	2.42235	22
13	q14.11	ENOX1-AS2	NR_120399	44022987	44033624	0.742798	0.742687	BRCA	13	del	tel	p	1	p	0.95	42551567	44962945	0.73296	0.7582	0.364699	1.20765e-09	8.91806	2.28007e-07	6.64205	2.42235	22
13	q14.11	CCDC122	NM_144974	44410488	44453872	0.738742	0.738288	BRCA	13	del	tel	p	1	p	0.95	42551567	44962945	0.73296	0.7582	0.364699	1.20765e-09	8.91806	2.28007e-07	6.64205	2.42235	22
13	q14.11	LACC1	NM_001128303	44453313	44468068	0.738294	0.73814	BRCA	13	del	tel	p	1	p	0.95	42551567	44962945	0.73296	0.7582	0.364699	1.20765e-09	8.91806	2.28007e-07	6.64205	2.42235	22
13	q14.11	LINC00284	NR_026955	44596470	44604599	0.736796	0.736711	BRCA	13	del	tel	p	1	p	0.95	42551567	44962945	0.73296	0.7582	0.364699	1.20765e-09	8.91806	2.28007e-07	6.64205	2.42235	22
13	q14.11	LINC00390	NR_132368	44680226	44721871	0.735919	0.735483	BRCA	13	del	tel	p	1	p	0.95	42551567	44962945	0.73296	0.7582	0.364699	1.20765e-09	8.91806	2.28007e-07	6.64205	2.42235	22
13	q14.11	SMIM2-AS1	NR_104065	44684684	44728211	0.735872	0.735417	BRCA	13	del	tel	p	1	p	0.95	42551567	44962945	0.73296	0.7582	0.364699	1.20765e-09	8.91806	2.28007e-07	6.64205	2.42235	22
13	q14.11	SMIM2	NM_024058	44717286	44735393	0.735531	0.735341	BRCA	13	del	tel	p	1	p	0.95	42551567	44962945	0.73296	0.7582	0.364699	1.20765e-09	8.91806	2.28007e-07	6.64205	2.42235	22
13	q14.11	SMIM2-IT1	NR_046843	44720605	44732358	0.735496	0.735373	BRCA	13	del	tel	p	1	p	0.95	42551567	44962945	0.73296	0.7582	0.364699	1.20765e-09	8.91806	2.28007e-07	6.64205	2.42235	22
13	q14.11	MIR8079	NR_107046	44770264	44770336	0.734976	0.734976	BRCA	13	del	tel	p	1	p	0.95	42551567	44962945	0.73296	0.7582	0.364699	1.20765e-09	8.91806	2.28007e-07	6.64205	2.42235	22
13	q14.11	SERP2	NM_001346980	44947785	44971850	0.733118	0.732866	BRCA	13	del	tel	p	1	p	0.95	42551567	44962945	0.73296	0.7582	0.364699	1.20765e-09	8.91806	2.28007e-07	6.64205	2.42235	22
19	p13.2	PDE4A	NM_001243121	10527448	10580307	0.430958	0.433182	BRCA	19p	del	tel	n	1	n	0.95	10577640	11501776	0.43307	0.47195	0.25733	1.42325e-11	10.8467	3.50359e-09	8.45549	2.17585	37
19	p13.2	KEAP1	NM_203500	10596795	10614054	0.433876	0.434602	BRCA	19p	del	tel	n	1	n	0.95	10577640	11501776	0.43307	0.47195	0.25733	1.42325e-11	10.8467	3.50359e-09	8.45549	2.17585	37
19	p13.2	S1PR5	NM_001166215	10623417	10628668	0.434996	0.435217	BRCA	19p	del	tel	n	1	n	0.95	10577640	11501776	0.43307	0.47195	0.25733	1.42325e-11	10.8467	3.50359e-09	8.45549	2.17585	37
19	p13.2	ATG4D	NR_104025	10654569	10664099	0.436306	0.436707	BRCA	19p	del	tel	n	1	n	0.95	10577640	11501776	0.43307	0.47195	0.25733	1.42325e-11	10.8467	3.50359e-09	8.45549	2.17585	37
19	p13.2	MIR1238	NR_031603	10662797	10662880	0.436652	0.436656	BRCA	19p	del	tel	n	1	n	0.95	10577640	11501776	0.43307	0.47195	0.25733	1.42325e-11	10.8467	3.50359e-09	8.45549	2.17585	37
19	p13.2	KRI1	NM_023008	10663760	10676702	0.436693	0.437237	BRCA	19p	del	tel	n	1	n	0.95	10577640	11501776	0.43307	0.47195	0.25733	1.42325e-11	10.8467	3.50359e-09	8.45549	2.17585	37
19	p13.2	CDKN2D	NM_079421	10677137	10679655	0.437256	0.437362	BRCA	19p	del	tel	n	1	n	0.95	10577640	11501776	0.43307	0.47195	0.25733	1.42325e-11	10.8467	3.50359e-09	8.45549	2.17585	37
19	p13.2	AP1M2	NM_005498	10683346	10697991	0.437517	0.438133	BRCA	19p	del	tel	n	1	n	0.95	10577640	11501776	0.43307	0.47195	0.25733	1.42325e-11	10.8467	3.50359e-09	8.45549	2.17585	37
19	p13.2	SLC44A2	NM_001145056	10713120	10755235	0.43877	0.440541	BRCA	19p	del	tel	n	1	n	0.95	10577640	11501776	0.43307	0.47195	0.25733	1.42325e-11	10.8467	3.50359e-09	8.45549	2.17585	37
19	p13.2	ILF3-AS1	NR_024333	10762537	10764548	0.440849	0.440933	BRCA	19p	del	tel	n	1	n	0.95	10577640	11501776	0.43307	0.47195	0.25733	1.42325e-11	10.8467	3.50359e-09	8.45549	2.17585	37
19	p13.2	ILF3	NM_012218	10764936	10803095	0.44095	0.442555	BRCA	19p	del	tel	n	1	n	0.95	10577640	11501776	0.43307	0.47195	0.25733	1.42325e-11	10.8467	3.50359e-09	8.45549	2.17585	37
19	p13.2	QTRT1	NM_031209	10812111	10824043	0.442934	0.443436	BRCA	19p	del	tel	n	1	n	0.95	10577640	11501776	0.43307	0.47195	0.25733	1.42325e-11	10.8467	3.50359e-09	8.45549	2.17585	37
19	p13.2	DNM2	NM_004945	10828728	10942586	0.443633	0.448424	BRCA	19p	del	tel	n	1	n	0.95	10577640	11501776	0.43307	0.47195	0.25733	1.42325e-11	10.8467	3.50359e-09	8.45549	2.17585	37
19	p13.2	MIR638	NR_030368	10829079	10829179	0.443648	0.443652	BRCA	19p	del	tel	n	1	n	0.95	10577640	11501776	0.43307	0.47195	0.25733	1.42325e-11	10.8467	3.50359e-09	8.45549	2.17585	37
19	p13.2	MIR4748	NR_039903	10890929	10891011	0.44625	0.446254	BRCA	19p	del	tel	n	1	n	0.95	10577640	11501776	0.43307	0.47195	0.25733	1.42325e-11	10.8467	3.50359e-09	8.45549	2.17585	37
19	p13.2	MIR199A1	NR_029586	10928101	10928172	0.447814	0.447817	BRCA	19p	del	tel	n	1	n	0.95	10577640	11501776	0.43307	0.47195	0.25733	1.42325e-11	10.8467	3.50359e-09	8.45549	2.17585	37
19	p13.2	MIR6793	NR_106851	10939648	10939711	0.4483	0.448303	BRCA	19p	del	tel	n	1	n	0.95	10577640	11501776	0.43307	0.47195	0.25733	1.42325e-11	10.8467	3.50359e-09	8.45549	2.17585	37
19	p13.2	TMED1	NM_006858	10942742	10946983	0.44843	0.448609	BRCA	19p	del	tel	n	1	n	0.95	10577640	11501776	0.43307	0.47195	0.25733	1.42325e-11	10.8467	3.50359e-09	8.45549	2.17585	37
19	p13.2	C19orf38	NM_001136482	10959077	10980466	0.449117	0.450017	BRCA	19p	del	tel	n	1	n	0.95	10577640	11501776	0.43307	0.47195	0.25733	1.42325e-11	10.8467	3.50359e-09	8.45549	2.17585	37
19	p13.2	CARM1	NM_199141	10982252	11033448	0.450092	0.452246	BRCA	19p	del	tel	n	1	n	0.95	10577640	11501776	0.43307	0.47195	0.25733	1.42325e-11	10.8467	3.50359e-09	8.45549	2.17585	37
19	p13.2	YIPF2	NM_024029	11033443	11039688	0.452246	0.452509	BRCA	19p	del	tel	n	1	n	0.95	10577640	11501776	0.43307	0.47195	0.25733	1.42325e-11	10.8467	3.50359e-09	8.45549	2.17585	37
19	p13.2	TIMM29	NM_138358	11039411	11040930	0.452497	0.452561	BRCA	19p	del	tel	n	1	n	0.95	10577640	11501776	0.43307	0.47195	0.25733	1.42325e-11	10.8467	3.50359e-09	8.45549	2.17585	37
19	p13.2	SMARCA4	NM_001128844	11071597	11172958	0.453851	0.458116	BRCA	19p	del	tel	n	1	n	0.95	10577640	11501776	0.43307	0.47195	0.25733	1.42325e-11	10.8467	3.50359e-09	8.45549	2.17585	37
19	p13.2	LDLR	NM_001195800	11200037	11244505	0.459255	0.461126	BRCA	19p	del	tel	n	1	n	0.95	10577640	11501776	0.43307	0.47195	0.25733	1.42325e-11	10.8467	3.50359e-09	8.45549	2.17585	37
19	p13.2	MIR6886	NR_106946	11224149	11224210	0.460269	0.460272	BRCA	19p	del	tel	n	1	n	0.95	10577640	11501776	0.43307	0.47195	0.25733	1.42325e-11	10.8467	3.50359e-09	8.45549	2.17585	37
19	p13.2	SPC24	NM_001317033	11256169	11266488	0.461617	0.462051	BRCA	19p	del	tel	n	1	n	0.95	10577640	11501776	0.43307	0.47195	0.25733	1.42325e-11	10.8467	3.50359e-09	8.45549	2.17585	37
19	p13.2	KANK2	NM_001136191	11274942	11308243	0.462406	0.463807	BRCA	19p	del	tel	n	1	n	0.95	10577640	11501776	0.43307	0.47195	0.25733	1.42325e-11	10.8467	3.50359e-09	8.45549	2.17585	37
19	p13.2	DOCK6	NM_020812	11309968	11373168	0.46388	0.466539	BRCA	19p	del	tel	n	1	n	0.95	10577640	11501776	0.43307	0.47195	0.25733	1.42325e-11	10.8467	3.50359e-09	8.45549	2.17585	37
19	p13.2	LOC105372273	NR_134909	11314303	11326844	0.464062	0.46459	BRCA	19p	del	tel	n	1	n	0.95	10577640	11501776	0.43307	0.47195	0.25733	1.42325e-11	10.8467	3.50359e-09	8.45549	2.17585	37
19	p13.2	ANGPTL8	NM_018687	11350294	11352619	0.465577	0.465674	BRCA	19p	del	tel	n	1	n	0.95	10577640	11501776	0.43307	0.47195	0.25733	1.42325e-11	10.8467	3.50359e-09	8.45549	2.17585	37
19	p13.2	TSPAN16	NM_012466	11406814	11437672	0.467954	0.469253	BRCA	19p	del	tel	n	1	n	0.95	10577640	11501776	0.43307	0.47195	0.25733	1.42325e-11	10.8467	3.50359e-09	8.45549	2.17585	37
19	p13.2	RAB3D	NM_004283	11432721	11450344	0.469044	0.469786	BRCA	19p	del	tel	n	1	n	0.95	10577640	11501776	0.43307	0.47195	0.25733	1.42325e-11	10.8467	3.50359e-09	8.45549	2.17585	37
19	p13.2	TMEM205	NM_001321114	11453451	11456981	0.469917	0.470065	BRCA	19p	del	tel	n	1	n	0.95	10577640	11501776	0.43307	0.47195	0.25733	1.42325e-11	10.8467	3.50359e-09	8.45549	2.17585	37
19	p13.2	CCDC159	NM_001080503	11457180	11465620	0.470073	0.470428	BRCA	19p	del	tel	n	1	n	0.95	10577640	11501776	0.43307	0.47195	0.25733	1.42325e-11	10.8467	3.50359e-09	8.45549	2.17585	37
19	p13.2	PLPPR2	NM_001170635	11466061	11476374	0.470447	0.470881	BRCA	19p	del	tel	n	1	n	0.95	10577640	11501776	0.43307	0.47195	0.25733	1.42325e-11	10.8467	3.50359e-09	8.45549	2.17585	37
19	p13.2	SWSAP1	NM_175871	11485382	11487627	0.47126	0.471354	BRCA	19p	del	tel	n	1	n	0.95	10577640	11501776	0.43307	0.47195	0.25733	1.42325e-11	10.8467	3.50359e-09	8.45549	2.17585	37
19	p13.2	EPOR	NR_033663	11487880	11495018	0.471365	0.471665	BRCA	19p	del	tel	n	1	n	0.95	10577640	11501776	0.43307	0.47195	0.25733	1.42325e-11	10.8467	3.50359e-09	8.45549	2.17585	37
1	q32.1	TNNI1	NM_003281	201372894	201390874	0.474204	0.474021	BRCA	1q	del	tel	n	1	n	0.95	201370246	209278401	0.393482	0.474231	0.536312	1.14842e-06	5.9399	0.000127104	3.89584	2.08938	130
1	q32.1	PHLDA3	NM_012396	201433411	201438299	0.473586	0.473537	BRCA	1q	del	tel	n	1	n	0.95	201370246	209278401	0.393482	0.474231	0.536312	1.14842e-06	5.9399	0.000127104	3.89584	2.08938	130
1	q32.1	CSRP1	NM_001193570	201452657	201476387	0.47339	0.473148	BRCA	1q	del	tel	n	1	n	0.95	201370246	209278401	0.393482	0.474231	0.536312	1.14842e-06	5.9399	0.000127104	3.89584	2.08938	130
1	q32.1	RPS10P7	NR_026667	201489031	201489720	0.473019	0.473012	BRCA	1q	del	tel	n	1	n	0.95	201370246	209278401	0.393482	0.474231	0.536312	1.14842e-06	5.9399	0.000127104	3.89584	2.08938	130
1	q32.1	NAV1	NM_020443	201617449	201796102	0.471707	0.469883	BRCA	1q	del	tel	n	1	n	0.95	201370246	209278401	0.393482	0.474231	0.536312	1.14842e-06	5.9399	0.000127104	3.89584	2.08938	130
1	q32.1	IPO9-AS1	NR_046696	201657383	201798687	0.4713	0.469857	BRCA	1q	del	tel	n	1	n	0.95	201370246	209278401	0.393482	0.474231	0.536312	1.14842e-06	5.9399	0.000127104	3.89584	2.08938	130
1	q32.1	MIR5191	NR_049823	201688635	201688755	0.47098	0.470979	BRCA	1q	del	tel	n	1	n	0.95	201370246	209278401	0.393482	0.474231	0.536312	1.14842e-06	5.9399	0.000127104	3.89584	2.08938	130
1	q32.1	MIR1231	NR_031599	201777738	201777830	0.470071	0.47007	BRCA	1q	del	tel	n	1	n	0.95	201370246	209278401	0.393482	0.474231	0.536312	1.14842e-06	5.9399	0.000127104	3.89584	2.08938	130
1	q32.1	IPO9	NM_018085	201798287	201853422	0.469861	0.469298	BRCA	1q	del	tel	n	1	n	0.95	201370246	209278401	0.393482	0.474231	0.536312	1.14842e-06	5.9399	0.000127104	3.89584	2.08938	130
1	q32.1	MIR6739	NR_106797	201832500	201832575	0.469511	0.469511	BRCA	1q	del	tel	n	1	n	0.95	201370246	209278401	0.393482	0.474231	0.536312	1.14842e-06	5.9399	0.000127104	3.89584	2.08938	130
1	q32.1	SHISA4	NR_030775	201857796	201861715	0.469253	0.469213	BRCA	1q	del	tel	n	1	n	0.95	201370246	209278401	0.393482	0.474231	0.536312	1.14842e-06	5.9399	0.000127104	3.89584	2.08938	130
1	q32.1	LMOD1	NM_012134	201865583	201915716	0.469174	0.468662	BRCA	1q	del	tel	n	1	n	0.95	201370246	209278401	0.393482	0.474231	0.536312	1.14842e-06	5.9399	0.000127104	3.89584	2.08938	130
1	q32.1	TIMM17A	NM_006335	201924618	201939789	0.468571	0.468416	BRCA	1q	del	tel	n	1	n	0.95	201370246	209278401	0.393482	0.474231	0.536312	1.14842e-06	5.9399	0.000127104	3.89584	2.08938	130
1	q32.1	SNORA70H	NR_145769	201947588	201947723	0.468336	0.468335	BRCA	1q	del	tel	n	1	n	0.95	201370246	209278401	0.393482	0.474231	0.536312	1.14842e-06	5.9399	0.000127104	3.89584	2.08938	130
1	q32.1	RNPEP	NM_001319183	201951765	201975275	0.468294	0.468054	BRCA	1q	del	tel	n	1	n	0.95	201370246	209278401	0.393482	0.474231	0.536312	1.14842e-06	5.9399	0.000127104	3.89584	2.08938	130
1	q32.1	ELF3-AS1	NR_146472	201969178	201979481	0.468116	0.468011	BRCA	1q	del	tel	n	1	n	0.95	201370246	209278401	0.393482	0.474231	0.536312	1.14842e-06	5.9399	0.000127104	3.89584	2.08938	130
1	q32.1	MIR6740	NR_106798	201972251	201972364	0.468084	0.468083	BRCA	1q	del	tel	n	1	n	0.95	201370246	209278401	0.393482	0.474231	0.536312	1.14842e-06	5.9399	0.000127104	3.89584	2.08938	130
1	q32.1	ELF3	NM_001114309	201979689	201986315	0.468008	0.467941	BRCA	1q	del	tel	n	1	n	0.95	201370246	209278401	0.393482	0.474231	0.536312	1.14842e-06	5.9399	0.000127104	3.89584	2.08938	130
1	q32.1	GPR37L1	NM_004767	202091968	202102716	0.466862	0.466752	BRCA	1q	del	tel	n	1	n	0.95	201370246	209278401	0.393482	0.474231	0.536312	1.14842e-06	5.9399	0.000127104	3.89584	2.08938	130
1	q32.1	ARL8A	NM_001256129	202102531	202113871	0.466754	0.466638	BRCA	1q	del	tel	n	1	n	0.95	201370246	209278401	0.393482	0.474231	0.536312	1.14842e-06	5.9399	0.000127104	3.89584	2.08938	130
1	q32.1	PTPN7	NR_037663	202116140	202130716	0.466615	0.466466	BRCA	1q	del	tel	n	1	n	0.95	201370246	209278401	0.393482	0.474231	0.536312	1.14842e-06	5.9399	0.000127104	3.89584	2.08938	130
1	q32.1	PTPRVP	NR_002930	202137178	202158577	0.4664	0.466182	BRCA	1q	del	tel	n	1	n	0.95	201370246	209278401	0.393482	0.474231	0.536312	1.14842e-06	5.9399	0.000127104	3.89584	2.08938	130
1	q32.1	LGR6	NM_001017403	202163117	202288889	0.466135	0.464851	BRCA	1q	del	tel	n	1	n	0.95	201370246	209278401	0.393482	0.474231	0.536312	1.14842e-06	5.9399	0.000127104	3.89584	2.08938	130
1	q32.1	UBE2T	NM_014176	202300784	202311094	0.46473	0.464625	BRCA	1q	del	tel	n	1	n	0.95	201370246	209278401	0.393482	0.474231	0.536312	1.14842e-06	5.9399	0.000127104	3.89584	2.08938	130
1	q32.1	PPP1R12B	NM_001331029	202317829	202557697	0.464556	0.462106	BRCA	1q	del	tel	n	1	n	0.95	201370246	209278401	0.393482	0.474231	0.536312	1.14842e-06	5.9399	0.000127104	3.89584	2.08938	130
1	q32.1	SYT2	NM_177402	202559724	202679551	0.462086	0.460862	BRCA	1q	del	tel	n	1	n	0.95	201370246	209278401	0.393482	0.474231	0.536312	1.14842e-06	5.9399	0.000127104	3.89584	2.08938	130
1	q32.1	KDM5B	NM_001347591	202694312	202778598	0.460711	0.459851	BRCA	1q	del	tel	n	1	n	0.95	201370246	209278401	0.393482	0.474231	0.536312	1.14842e-06	5.9399	0.000127104	3.89584	2.08938	130
1	q32.1	PCAT6	NR_046325	202780073	202781041	0.459836	0.459826	BRCA	1q	del	tel	n	1	n	0.95	201370246	209278401	0.393482	0.474231	0.536312	1.14842e-06	5.9399	0.000127104	3.89584	2.08938	130
1	q32.1	MGAT4EP	NR_038135	202789384	202796341	0.459741	0.45967	BRCA	1q	del	tel	n	1	n	0.95	201370246	209278401	0.393482	0.474231	0.536312	1.14842e-06	5.9399	0.000127104	3.89584	2.08938	130
1	q32.1	LOC148709	NR_002929	202830881	202844369	0.459317	0.459179	BRCA	1q	del	tel	n	1	n	0.95	201370246	209278401	0.393482	0.474231	0.536312	1.14842e-06	5.9399	0.000127104	3.89584	2.08938	130
1	q32.1	RABIF	NM_002871	202847409	202858385	0.459148	0.459036	BRCA	1q	del	tel	n	1	n	0.95	201370246	209278401	0.393482	0.474231	0.536312	1.14842e-06	5.9399	0.000127104	3.89584	2.08938	130
1	q32.1	KLHL12	NM_001303051	202860223	202897772	0.459017	0.458634	BRCA	1q	del	tel	n	1	n	0.95	201370246	209278401	0.393482	0.474231	0.536312	1.14842e-06	5.9399	0.000127104	3.89584	2.08938	130
1	q32.1	ADIPOR1	NM_001290629	202909952	202927700	0.45851	0.458328	BRCA	1q	del	tel	n	1	n	0.95	201370246	209278401	0.393482	0.474231	0.536312	1.14842e-06	5.9399	0.000127104	3.89584	2.08938	130
1	q32.1	CYB5R1	NM_016243	202931000	202936404	0.458295	0.45824	BRCA	1q	del	tel	n	1	n	0.95	201370246	209278401	0.393482	0.474231	0.536312	1.14842e-06	5.9399	0.000127104	3.89584	2.08938	130
1	q32.1	LOC100506747	NR_036557	202955579	202976393	0.458044	0.457831	BRCA	1q	del	tel	n	1	n	0.95	201370246	209278401	0.393482	0.474231	0.536312	1.14842e-06	5.9399	0.000127104	3.89584	2.08938	130
1	q32.1	TMEM183A	NR_136530	202976494	202993976	0.45783	0.457652	BRCA	1q	del	tel	n	1	n	0.95	201370246	209278401	0.393482	0.474231	0.536312	1.14842e-06	5.9399	0.000127104	3.89584	2.08938	130
1	q32.1	TMEM183B	NM_001079809	202976535	202992668	0.45783	0.457665	BRCA	1q	del	tel	n	1	n	0.95	201370246	209278401	0.393482	0.474231	0.536312	1.14842e-06	5.9399	0.000127104	3.89584	2.08938	130
1	q32.1	PPFIA4	NM_001304331	202995648	203047864	0.457635	0.457101	BRCA	1q	del	tel	n	1	n	0.95	201370246	209278401	0.393482	0.474231	0.536312	1.14842e-06	5.9399	0.000127104	3.89584	2.08938	130
1	q32.1	MYOG	NM_002479	203052256	203055166	0.457057	0.457027	BRCA	1q	del	tel	n	1	n	0.95	201370246	209278401	0.393482	0.474231	0.536312	1.14842e-06	5.9399	0.000127104	3.89584	2.08938	130
1	q32.1	ADORA1	NM_001048230	203096835	203136533	0.456601	0.456196	BRCA	1q	del	tel	n	1	n	0.95	201370246	209278401	0.393482	0.474231	0.536312	1.14842e-06	5.9399	0.000127104	3.89584	2.08938	130
1	q32.1	MYBPH	NM_004997	203136938	203144942	0.456192	0.45611	BRCA	1q	del	tel	n	1	n	0.95	201370246	209278401	0.393482	0.474231	0.536312	1.14842e-06	5.9399	0.000127104	3.89584	2.08938	130
1	q32.1	CHI3L1	NM_001276	203148058	203155922	0.456078	0.455998	BRCA	1q	del	tel	n	1	n	0.95	201370246	209278401	0.393482	0.474231	0.536312	1.14842e-06	5.9399	0.000127104	3.89584	2.08938	130
1	q32.1	CHIT1	NM_003465	203185206	203198860	0.455699	0.45556	BRCA	1q	del	tel	n	1	n	0.95	201370246	209278401	0.393482	0.474231	0.536312	1.14842e-06	5.9399	0.000127104	3.89584	2.08938	130
1	q32.1	LINC01353	NR_117097	203256279	203257924	0.454973	0.454956	BRCA	1q	del	tel	n	1	n	0.95	201370246	209278401	0.393482	0.474231	0.536312	1.14842e-06	5.9399	0.000127104	3.89584	2.08938	130
1	q32.1	LINC01136	NR_034150	203267885	203274453	0.454855	0.454788	BRCA	1q	del	tel	n	1	n	0.95	201370246	209278401	0.393482	0.474231	0.536312	1.14842e-06	5.9399	0.000127104	3.89584	2.08938	130
1	q32.1	BTG2	NM_006763	203274663	203278729	0.454786	0.454744	BRCA	1q	del	tel	n	1	n	0.95	201370246	209278401	0.393482	0.474231	0.536312	1.14842e-06	5.9399	0.000127104	3.89584	2.08938	130
1	q32.1	FMOD	NM_002023	203309748	203320557	0.454427	0.454317	BRCA	1q	del	tel	n	1	n	0.95	201370246	209278401	0.393482	0.474231	0.536312	1.14842e-06	5.9399	0.000127104	3.89584	2.08938	130
1	q32.1	PRELP	NM_201348	203444882	203460479	0.453047	0.452888	BRCA	1q	del	tel	n	1	n	0.95	201370246	209278401	0.393482	0.474231	0.536312	1.14842e-06	5.9399	0.000127104	3.89584	2.08938	130
1	q32.1	OPTC	NM_014359	203463270	203478077	0.45286	0.452709	BRCA	1q	del	tel	n	1	n	0.95	201370246	209278401	0.393482	0.474231	0.536312	1.14842e-06	5.9399	0.000127104	3.89584	2.08938	130
1	q32.1	ATP2B4	NM_001684	203595914	203713209	0.451505	0.450308	BRCA	1q	del	tel	n	1	n	0.95	201370246	209278401	0.393482	0.474231	0.536312	1.14842e-06	5.9399	0.000127104	3.89584	2.08938	130
1	q32.1	SNORA77	NR_003019	203698708	203698833	0.450456	0.450454	BRCA	1q	del	tel	n	1	n	0.95	201370246	209278401	0.393482	0.474231	0.536312	1.14842e-06	5.9399	0.000127104	3.89584	2.08938	130
1	q32.1	LINC00260	NR_046213	203699704	203700979	0.450445	0.450432	BRCA	1q	del	tel	n	1	n	0.95	201370246	209278401	0.393482	0.474231	0.536312	1.14842e-06	5.9399	0.000127104	3.89584	2.08938	130
1	q32.1	LAX1	NM_017773	203734283	203745480	0.450092	0.449978	BRCA	1q	del	tel	n	1	n	0.95	201370246	209278401	0.393482	0.474231	0.536312	1.14842e-06	5.9399	0.000127104	3.89584	2.08938	130
1	q32.1	ZC3H11A	NM_001319239	203764664	203823256	0.449782	0.449184	BRCA	1q	del	tel	n	1	n	0.95	201370246	209278401	0.393482	0.474231	0.536312	1.14842e-06	5.9399	0.000127104	3.89584	2.08938	130
1	q32.1	ZBED6	NM_001174108	203766650	203770200	0.449762	0.449726	BRCA	1q	del	tel	n	1	n	0.95	201370246	209278401	0.393482	0.474231	0.536312	1.14842e-06	5.9399	0.000127104	3.89584	2.08938	130
1	q32.1	SNRPE	NR_130746	203830712	203840280	0.449108	0.44901	BRCA	1q	del	tel	n	1	n	0.95	201370246	209278401	0.393482	0.474231	0.536312	1.14842e-06	5.9399	0.000127104	3.89584	2.08938	130
1	q32.1	LINC00303	NR_027902	204001574	204010392	0.447363	0.447273	BRCA	1q	del	tel	n	1	n	0.95	201370246	209278401	0.393482	0.474231	0.536312	1.14842e-06	5.9399	0.000127104	3.89584	2.08938	130
1	q32.1	SOX13	NM_005686	204042245	204096871	0.446948	0.44639	BRCA	1q	del	tel	n	1	n	0.95	201370246	209278401	0.393482	0.474231	0.536312	1.14842e-06	5.9399	0.000127104	3.89584	2.08938	130
1	q32.1	ETNK2	NM_001297761	204100188	204121310	0.446356	0.44614	BRCA	1q	del	tel	n	1	n	0.95	201370246	209278401	0.393482	0.474231	0.536312	1.14842e-06	5.9399	0.000127104	3.89584	2.08938	130
1	q32.1	ERLNC1	NR_123739	204110535	204112137	0.446251	0.446234	BRCA	1q	del	tel	n	1	n	0.95	201370246	209278401	0.393482	0.474231	0.536312	1.14842e-06	5.9399	0.000127104	3.89584	2.08938	130
1	q32.1	REN	NM_000537	204123943	204135465	0.446114	0.445996	BRCA	1q	del	tel	n	1	n	0.95	201370246	209278401	0.393482	0.474231	0.536312	1.14842e-06	5.9399	0.000127104	3.89584	2.08938	130
1	q32.1	KISS1	NM_002256	204159468	204165619	0.445751	0.445688	BRCA	1q	del	tel	n	1	n	0.95	201370246	209278401	0.393482	0.474231	0.536312	1.14842e-06	5.9399	0.000127104	3.89584	2.08938	130
1	q32.1	GOLT1A	NM_198447	204167287	204183220	0.445671	0.445508	BRCA	1q	del	tel	n	1	n	0.95	201370246	209278401	0.393482	0.474231	0.536312	1.14842e-06	5.9399	0.000127104	3.89584	2.08938	130
1	q32.1	PLEKHA6	NM_014935	204187978	204329057	0.44546	0.444019	BRCA	1q	del	tel	n	1	n	0.95	201370246	209278401	0.393482	0.474231	0.536312	1.14842e-06	5.9399	0.000127104	3.89584	2.08938	130
1	q32.1	LINC00628	NR_027022	204337557	204338847	0.443932	0.443919	BRCA	1q	del	tel	n	1	n	0.95	201370246	209278401	0.393482	0.474231	0.536312	1.14842e-06	5.9399	0.000127104	3.89584	2.08938	130
1	q32.1	PPP1R15B	NM_032833	204372491	204380945	0.443576	0.443489	BRCA	1q	del	tel	n	1	n	0.95	201370246	209278401	0.393482	0.474231	0.536312	1.14842e-06	5.9399	0.000127104	3.89584	2.08938	130
1	q32.1	PIK3C2B	NM_002646	204391757	204459474	0.443379	0.442688	BRCA	1q	del	tel	n	1	n	0.95	201370246	209278401	0.393482	0.474231	0.536312	1.14842e-06	5.9399	0.000127104	3.89584	2.08938	130
1	q32.1	MDM4	NM_001278516	204485506	204527248	0.442422	0.441995	BRCA	1q	del	tel	n	1	n	0.95	201370246	209278401	0.393482	0.474231	0.536312	1.14842e-06	5.9399	0.000127104	3.89584	2.08938	130
1	q32.1	LRRN2	NM_201630	204586302	204654597	0.441392	0.440695	BRCA	1q	del	tel	n	1	n	0.95	201370246	209278401	0.393482	0.474231	0.536312	1.14842e-06	5.9399	0.000127104	3.89584	2.08938	130
1	q32.1	NFASC	NM_015090	204797781	204991950	0.439233	0.43725	BRCA	1q	del	tel	n	1	n	0.95	201370246	209278401	0.393482	0.474231	0.536312	1.14842e-06	5.9399	0.000127104	3.89584	2.08938	130
1	q32.1	CNTN2	NM_001346083	205012064	205047400	0.437045	0.436684	BRCA	1q	del	tel	n	1	n	0.95	201370246	209278401	0.393482	0.474231	0.536312	1.14842e-06	5.9399	0.000127104	3.89584	2.08938	130
1	q32.1	TMEM81	NM_203376	205052256	205053588	0.436635	0.436621	BRCA	1q	del	tel	n	1	n	0.95	201370246	209278401	0.393482	0.474231	0.536312	1.14842e-06	5.9399	0.000127104	3.89584	2.08938	130
1	q32.1	RBBP5	NM_001193272	205055269	205091150	0.436604	0.436238	BRCA	1q	del	tel	n	1	n	0.95	201370246	209278401	0.393482	0.474231	0.536312	1.14842e-06	5.9399	0.000127104	3.89584	2.08938	130
1	q32.1	DSTYK	NM_199462	205111630	205180727	0.436028	0.435323	BRCA	1q	del	tel	n	1	n	0.95	201370246	209278401	0.393482	0.474231	0.536312	1.14842e-06	5.9399	0.000127104	3.89584	2.08938	130
1	q32.1	TMCC2	NM_014858	205197037	205242471	0.435156	0.434692	BRCA	1q	del	tel	n	1	n	0.95	201370246	209278401	0.393482	0.474231	0.536312	1.14842e-06	5.9399	0.000127104	3.89584	2.08938	130
1	q32.1	NUAK2	NM_030952	205271190	205290919	0.434399	0.434198	BRCA	1q	del	tel	n	1	n	0.95	201370246	209278401	0.393482	0.474231	0.536312	1.14842e-06	5.9399	0.000127104	3.89584	2.08938	130
1	q32.1	KLHDC8A	NM_001271864	205305192	205326218	0.434052	0.433837	BRCA	1q	del	tel	n	1	n	0.95	201370246	209278401	0.393482	0.474231	0.536312	1.14842e-06	5.9399	0.000127104	3.89584	2.08938	130
1	q32.1	LEMD1-AS1	NR_038425	205342379	205356568	0.433672	0.433527	BRCA	1q	del	tel	n	1	n	0.95	201370246	209278401	0.393482	0.474231	0.536312	1.14842e-06	5.9399	0.000127104	3.89584	2.08938	130
1	q32.1	LEMD1	NR_037583	205350505	205391214	0.433589	0.433174	BRCA	1q	del	tel	n	1	n	0.95	201370246	209278401	0.393482	0.474231	0.536312	1.14842e-06	5.9399	0.000127104	3.89584	2.08938	130
1	q32.1	BLACAT1	NR_103783	205404013	205425214	0.433043	0.432826	BRCA	1q	del	tel	n	1	n	0.95	201370246	209278401	0.393482	0.474231	0.536312	1.14842e-06	5.9399	0.000127104	3.89584	2.08938	130
1	q32.1	MIR135B	NR_029893	205417429	205417526	0.432906	0.432905	BRCA	1q	del	tel	n	1	n	0.95	201370246	209278401	0.393482	0.474231	0.536312	1.14842e-06	5.9399	0.000127104	3.89584	2.08938	130
1	q32.1	LOC284577	NR_148934	205425185	205438152	0.432827	0.432694	BRCA	1q	del	tel	n	1	n	0.95	201370246	209278401	0.393482	0.474231	0.536312	1.14842e-06	5.9399	0.000127104	3.89584	2.08938	130
1	q32.1	CDK18	NM_212503	205473683	205501921	0.432331	0.432043	BRCA	1q	del	tel	n	1	n	0.95	201370246	209278401	0.393482	0.474231	0.536312	1.14842e-06	5.9399	0.000127104	3.89584	2.08938	130
1	q32.1	LOC284578	NR_152721	205523399	205538433	0.431824	0.43167	BRCA	1q	del	tel	n	1	n	0.95	201370246	209278401	0.393482	0.474231	0.536312	1.14842e-06	5.9399	0.000127104	3.89584	2.08938	130
1	q32.1	MFSD4A	NM_181644	205538111	205572046	0.431674	0.431327	BRCA	1q	del	tel	n	1	n	0.95	201370246	209278401	0.393482	0.474231	0.536312	1.14842e-06	5.9399	0.000127104	3.89584	2.08938	130
1	q32.1	ELK4	NM_001973	205577070	205602000	0.431276	0.431021	BRCA	1q	del	tel	n	1	n	0.95	201370246	209278401	0.393482	0.474231	0.536312	1.14842e-06	5.9399	0.000127104	3.89584	2.08938	130
1	q32.1	SLC45A3	NM_033102	205626980	205649630	0.430766	0.430535	BRCA	1q	del	tel	n	1	n	0.95	201370246	209278401	0.393482	0.474231	0.536312	1.14842e-06	5.9399	0.000127104	3.89584	2.08938	130
1	q32.1	NUCKS1	NM_022731	205681946	205719372	0.430205	0.429823	BRCA	1q	del	tel	n	1	n	0.95	201370246	209278401	0.393482	0.474231	0.536312	1.14842e-06	5.9399	0.000127104	3.89584	2.08938	130
1	q32.1	RAB29	NM_003929	205737113	205744610	0.429642	0.429565	BRCA	1q	del	tel	n	1	n	0.95	201370246	209278401	0.393482	0.474231	0.536312	1.14842e-06	5.9399	0.000127104	3.89584	2.08938	130
1	q32.1	SLC41A1	NM_173854	205758220	205782324	0.429426	0.42918	BRCA	1q	del	tel	n	1	n	0.95	201370246	209278401	0.393482	0.474231	0.536312	1.14842e-06	5.9399	0.000127104	3.89584	2.08938	130
1	q32.1	PM20D1	NR_135186	205797149	205819276	0.429029	0.428803	BRCA	1q	del	tel	n	1	n	0.95	201370246	209278401	0.393482	0.474231	0.536312	1.14842e-06	5.9399	0.000127104	3.89584	2.08938	130
1	q32.1	LOC284581	NR_046097	205831206	205865215	0.428681	0.428334	BRCA	1q	del	tel	n	1	n	0.95	201370246	209278401	0.393482	0.474231	0.536312	1.14842e-06	5.9399	0.000127104	3.89584	2.08938	130
1	q32.1	SLC26A9	NM_134325	205882176	205912588	0.42816	0.42785	BRCA	1q	del	tel	n	1	n	0.95	201370246	209278401	0.393482	0.474231	0.536312	1.14842e-06	5.9399	0.000127104	3.89584	2.08938	130
1	q32.1	FAM72A	NM_001317901	206137264	206155151	0.425556	0.425373	BRCA	1q	del	tel	n	1	n	0.95	201370246	209278401	0.393482	0.474231	0.536312	1.14842e-06	5.9399	0.000127104	3.89584	2.08938	130
1	q32.1	AVPR1B	NM_000707	206224280	206234394	0.424667	0.424564	BRCA	1q	del	tel	n	1	n	0.95	201370246	209278401	0.393482	0.474231	0.536312	1.14842e-06	5.9399	0.000127104	3.89584	2.08938	130
1	q32.1	RHEX	NM_001007544	206238871	206288647	0.424518	0.42401	BRCA	1q	del	tel	n	1	n	0.95	201370246	209278401	0.393482	0.474231	0.536312	1.14842e-06	5.9399	0.000127104	3.89584	2.08938	130
1	q32.1	CTSE	NM_001317331	206317458	206332104	0.423716	0.423566	BRCA	1q	del	tel	n	1	n	0.95	201370246	209278401	0.393482	0.474231	0.536312	1.14842e-06	5.9399	0.000127104	3.89584	2.08938	130
1	q32.1	SRGAP2	NM_015326	206516199	206637783	0.421686	0.420445	BRCA	1q	del	tel	n	1	n	0.95	201370246	209278401	0.393482	0.474231	0.536312	1.14842e-06	5.9399	0.000127104	3.89584	2.08938	130
1	q32.1	SRGAP2D	NR_120535	206557366	206581301	0.421266	0.421022	BRCA	1q	del	tel	n	1	n	0.95	201370246	209278401	0.393482	0.474231	0.536312	1.14842e-06	5.9399	0.000127104	3.89584	2.08938	130
1	q32.1	IKBKE	NM_001193321	206643585	206670223	0.420386	0.420114	BRCA	1q	del	tel	n	1	n	0.95	201370246	209278401	0.393482	0.474231	0.536312	1.14842e-06	5.9399	0.000127104	3.89584	2.08938	130
1	q32.1	MIR6769B	NR_106919	206648145	206648207	0.420339	0.420339	BRCA	1q	del	tel	n	1	n	0.95	201370246	209278401	0.393482	0.474231	0.536312	1.14842e-06	5.9399	0.000127104	3.89584	2.08938	130
1	q32.1	RASSF5	NM_182664	206680862	206762616	0.420005	0.41917	BRCA	1q	del	tel	n	1	n	0.95	201370246	209278401	0.393482	0.474231	0.536312	1.14842e-06	5.9399	0.000127104	3.89584	2.08938	130
1	q32.1	EIF2D	NM_001201478	206764973	206785904	0.419146	0.418932	BRCA	1q	del	tel	n	1	n	0.95	201370246	209278401	0.393482	0.474231	0.536312	1.14842e-06	5.9399	0.000127104	3.89584	2.08938	130
1	q32.1	DYRK3	NM_003582	206808880	206822542	0.418698	0.418558	BRCA	1q	del	tel	n	1	n	0.95	201370246	209278401	0.393482	0.474231	0.536312	1.14842e-06	5.9399	0.000127104	3.89584	2.08938	130
1	q32.1	MAPKAPK2	NM_004759	206858364	206907630	0.418193	0.41769	BRCA	1q	del	tel	n	1	n	0.95	201370246	209278401	0.393482	0.474231	0.536312	1.14842e-06	5.9399	0.000127104	3.89584	2.08938	130
1	q32.1	IL10	NM_000572	206940947	206945839	0.417349	0.417299	BRCA	1q	del	tel	n	1	n	0.95	201370246	209278401	0.393482	0.474231	0.536312	1.14842e-06	5.9399	0.000127104	3.89584	2.08938	130
1	q32.1	IL19	NM_153758	206972214	207016326	0.41703	0.41658	BRCA	1q	del	tel	n	1	n	0.95	201370246	209278401	0.393482	0.474231	0.536312	1.14842e-06	5.9399	0.000127104	3.89584	2.08938	130
1	q32.1	IL20	NM_018724	207039153	207042568	0.416347	0.416312	BRCA	1q	del	tel	n	1	n	0.95	201370246	209278401	0.393482	0.474231	0.536312	1.14842e-06	5.9399	0.000127104	3.89584	2.08938	130
1	q32.1	IL24	NM_001185157	207070787	207077484	0.416024	0.415955	BRCA	1q	del	tel	n	1	n	0.95	201370246	209278401	0.393482	0.474231	0.536312	1.14842e-06	5.9399	0.000127104	3.89584	2.08938	130
1	q32.1	FCMR	NM_005449	207076630	207095378	0.415964	0.415772	BRCA	1q	del	tel	n	1	n	0.95	201370246	209278401	0.393482	0.474231	0.536312	1.14842e-06	5.9399	0.000127104	3.89584	2.08938	130
1	q32.1	PIGR	NM_002644	207101866	207119811	0.415706	0.415523	BRCA	1q	del	tel	n	1	n	0.95	201370246	209278401	0.393482	0.474231	0.536312	1.14842e-06	5.9399	0.000127104	3.89584	2.08938	130
1	q32.1	FCAMR	NM_032029	207131311	207143970	0.415406	0.415276	BRCA	1q	del	tel	n	1	n	0.95	201370246	209278401	0.393482	0.474231	0.536312	1.14842e-06	5.9399	0.000127104	3.89584	2.08938	130
1	q32.1	C1orf116	NM_001083924	207191865	207206101	0.414787	0.414642	BRCA	1q	del	tel	n	1	n	0.95	201370246	209278401	0.393482	0.474231	0.536312	1.14842e-06	5.9399	0.000127104	3.89584	2.08938	130
1	q32.2	YOD1	NM_001276320	207217193	207226325	0.414529	0.414435	BRCA	1q	del	tel	n	1	n	0.95	201370246	209278401	0.393482	0.474231	0.536312	1.14842e-06	5.9399	0.000127104	3.89584	2.08938	130
1	q32.2	PFKFB2	NM_001018053	207226619	207254368	0.414432	0.414149	BRCA	1q	del	tel	n	1	n	0.95	201370246	209278401	0.393482	0.474231	0.536312	1.14842e-06	5.9399	0.000127104	3.89584	2.08938	130
1	q32.2	C4BPB	NM_001017366	207262186	207273337	0.414069	0.413955	BRCA	1q	del	tel	n	1	n	0.95	201370246	209278401	0.393482	0.474231	0.536312	1.14842e-06	5.9399	0.000127104	3.89584	2.08938	130
1	q32.2	C4BPA	NM_000715	207277606	207318317	0.413912	0.413496	BRCA	1q	del	tel	n	1	n	0.95	201370246	209278401	0.393482	0.474231	0.536312	1.14842e-06	5.9399	0.000127104	3.89584	2.08938	130
1	q32.2	CD55	NR_125349	207494816	207534311	0.411694	0.411291	BRCA	1q	del	tel	n	1	n	0.95	201370246	209278401	0.393482	0.474231	0.536312	1.14842e-06	5.9399	0.000127104	3.89584	2.08938	130
1	q32.2	CR2	NM_001877	207627644	207663240	0.410338	0.409974	BRCA	1q	del	tel	n	1	n	0.95	201370246	209278401	0.393482	0.474231	0.536312	1.14842e-06	5.9399	0.000127104	3.89584	2.08938	130
1	q32.2	CR1	NM_000651	207669472	207815110	0.40991	0.408423	BRCA	1q	del	tel	n	1	n	0.95	201370246	209278401	0.393482	0.474231	0.536312	1.14842e-06	5.9399	0.000127104	3.89584	2.08938	130
1	q32.2	CR1L	NM_175710	207818457	207897036	0.408389	0.407587	BRCA	1q	del	tel	n	1	n	0.95	201370246	209278401	0.393482	0.474231	0.536312	1.14842e-06	5.9399	0.000127104	3.89584	2.08938	130
1	q32.2	CD46	NM_172361	207925382	207968861	0.407297	0.406853	BRCA	1q	del	tel	n	1	n	0.95	201370246	209278401	0.393482	0.474231	0.536312	1.14842e-06	5.9399	0.000127104	3.89584	2.08938	130
1	q32.2	MIR29B2CHG	NR_135298	207974862	207996048	0.406792	0.406576	BRCA	1q	del	tel	n	1	n	0.95	201370246	209278401	0.393482	0.474231	0.536312	1.14842e-06	5.9399	0.000127104	3.89584	2.08938	130
1	q32.2	MIR29C	NR_029832	207975196	207975284	0.406789	0.406788	BRCA	1q	del	tel	n	1	n	0.95	201370246	209278401	0.393482	0.474231	0.536312	1.14842e-06	5.9399	0.000127104	3.89584	2.08938	130
1	q32.2	MIR29B2	NR_029518	207975787	207975868	0.406783	0.406782	BRCA	1q	del	tel	n	1	n	0.95	201370246	209278401	0.393482	0.474231	0.536312	1.14842e-06	5.9399	0.000127104	3.89584	2.08938	130
1	q32.2	LOC148696	NR_026817	207991723	207995941	0.40662	0.406577	BRCA	1q	del	tel	n	1	n	0.95	201370246	209278401	0.393482	0.474231	0.536312	1.14842e-06	5.9399	0.000127104	3.89584	2.08938	130
1	q32.2	CD34	NM_001773	208059882	208084683	0.405924	0.405671	BRCA	1q	del	tel	n	1	n	0.95	201370246	209278401	0.393482	0.474231	0.536312	1.14842e-06	5.9399	0.000127104	3.89584	2.08938	130
1	q32.2	PLXNA2	NM_025179	208195587	208417665	0.404538	0.402271	BRCA	1q	del	tel	n	1	n	0.95	201370246	209278401	0.393482	0.474231	0.536312	1.14842e-06	5.9399	0.000127104	3.89584	2.08938	130
1	q32.2	LINC01717	NR_146914	208902032	208906529	0.397325	0.397279	BRCA	1q	del	tel	n	1	n	0.95	201370246	209278401	0.393482	0.474231	0.536312	1.14842e-06	5.9399	0.000127104	3.89584	2.08938	130
1	q32.2	LINC01774	NR_146915	209145798	209148652	0.394836	0.394807	BRCA	1q	del	tel	n	1	n	0.95	201370246	209278401	0.393482	0.474231	0.536312	1.14842e-06	5.9399	0.000127104	3.89584	2.08938	130
5	q12.1	PDE4D	NM_001165899	58264865	59783925	0.937498	0.925834	BRCA	5q	del	tel	p	1	p	0.95	59552321	63182542	0.899738	0.927612	0.397164	4.38384e-08	7.35815	6.42945e-06	5.19183	2.06201	18
5	q12.1	PART1	NR_024617	59783539	59843484	0.925837	0.925377	BRCA	5q	del	tel	p	1	p	0.95	59552321	63182542	0.899738	0.927612	0.397164	4.38384e-08	7.35815	6.42945e-06	5.19183	2.06201	18
5	q12.1	DEPDC1B	NM_001145208	59892738	59995993	0.924998	0.924206	BRCA	5q	del	tel	p	1	p	0.95	59552321	63182542	0.899738	0.927612	0.397164	4.38384e-08	7.35815	6.42945e-06	5.19183	2.06201	18
5	q12.1	ELOVL7	NM_001297618	60047615	60140101	0.923809	0.923099	BRCA	5q	del	tel	p	1	p	0.95	59552321	63182542	0.899738	0.927612	0.397164	4.38384e-08	7.35815	6.42945e-06	5.19183	2.06201	18
5	q12.1	ERCC8	NM_001290285	60169658	60240905	0.922872	0.922325	BRCA	5q	del	tel	p	1	p	0.95	59552321	63182542	0.899738	0.927612	0.397164	4.38384e-08	7.35815	6.42945e-06	5.19183	2.06201	18
5	q12.1	NDUFAF2	NM_174889	60240955	60448864	0.922325	0.920728	BRCA	5q	del	tel	p	1	p	0.95	59552321	63182542	0.899738	0.927612	0.397164	4.38384e-08	7.35815	6.42945e-06	5.19183	2.06201	18
5	q12.1	SMIM15	NM_001048249	60453535	60458302	0.920692	0.920656	BRCA	5q	del	tel	p	1	p	0.95	59552321	63182542	0.899738	0.927612	0.397164	4.38384e-08	7.35815	6.42945e-06	5.19183	2.06201	18
5	q12.1	SMIM15-AS1	NR_109908	60458142	60527907	0.920657	0.920121	BRCA	5q	del	tel	p	1	p	0.95	59552321	63182542	0.899738	0.927612	0.397164	4.38384e-08	7.35815	6.42945e-06	5.19183	2.06201	18
5	q12.1	LINC02057	NR_146624	60546386	60560756	0.919979	0.919869	BRCA	5q	del	tel	p	1	p	0.95	59552321	63182542	0.899738	0.927612	0.397164	4.38384e-08	7.35815	6.42945e-06	5.19183	2.06201	18
5	q12.1	ZSWIM6	NM_020928	60628099	60841999	0.919352	0.91771	BRCA	5q	del	tel	p	1	p	0.95	59552321	63182542	0.899738	0.927612	0.397164	4.38384e-08	7.35815	6.42945e-06	5.19183	2.06201	18
5	q12.1	C5orf64	NR_126525	60933607	61026824	0.917006	0.91629	BRCA	5q	del	tel	p	1	p	0.95	59552321	63182542	0.899738	0.927612	0.397164	4.38384e-08	7.35815	6.42945e-06	5.19183	2.06201	18
5	q12.1	LOC101928651	NR_109910	60958984	60994259	0.916811	0.91654	BRCA	5q	del	tel	p	1	p	0.95	59552321	63182542	0.899738	0.927612	0.397164	4.38384e-08	7.35815	6.42945e-06	5.19183	2.06201	18
5	q12.1	C5orf64-AS1	NR_105000	61028616	61031525	0.916277	0.916254	BRCA	5q	del	tel	p	1	p	0.95	59552321	63182542	0.899738	0.927612	0.397164	4.38384e-08	7.35815	6.42945e-06	5.19183	2.06201	18
5	q12.1	KIF2A	NM_001243953	61601988	61683011	0.911874	0.911252	BRCA	5q	del	tel	p	1	p	0.95	59552321	63182542	0.899738	0.927612	0.397164	4.38384e-08	7.35815	6.42945e-06	5.19183	2.06201	18
5	q12.1	DIMT1	NM_001348077	61683779	61699787	0.911246	0.911123	BRCA	5q	del	tel	p	1	p	0.95	59552321	63182542	0.899738	0.927612	0.397164	4.38384e-08	7.35815	6.42945e-06	5.19183	2.06201	18
5	q12.1	IPO11	NM_016338	61708572	61924416	0.911056	0.909398	BRCA	5q	del	tel	p	1	p	0.95	59552321	63182542	0.899738	0.927612	0.397164	4.38384e-08	7.35815	6.42945e-06	5.19183	2.06201	18
5	q12.1	IPO11-LRRC70	NR_073584	61874561	61924416	0.909781	0.909398	BRCA	5q	del	tel	p	1	p	0.95	59552321	63182542	0.899738	0.927612	0.397164	4.38384e-08	7.35815	6.42945e-06	5.19183	2.06201	18
5	q12.1	LRRC70	NM_181506	61874561	61877275	0.909781	0.90976	BRCA	5q	del	tel	p	1	p	0.95	59552321	63182542	0.899738	0.927612	0.397164	4.38384e-08	7.35815	6.42945e-06	5.19183	2.06201	18
3	p14.1	MAGI1	NM_015520	65339905	66024509	0.715134	0.72289	BRCA	3p	del	tel	p	1	p	0.95	65741880	81650776	0.719688	0.899911	0.334728	4.60988e-09	8.33631	7.96799e-07	6.09865	2.04139	57
3	p14.1	MAGI1-IT1	NR_145422	65858488	65940233	0.721009	0.721935	BRCA	3p	del	tel	p	1	p	0.95	65741880	81650776	0.719688	0.899911	0.334728	4.60988e-09	8.33631	7.96799e-07	6.09865	2.04139	57
3	p14.1	MAGI1-AS1	NR_046575	65879490	65910972	0.721247	0.721604	BRCA	3p	del	tel	p	1	p	0.95	65741880	81650776	0.719688	0.899911	0.334728	4.60988e-09	8.33631	7.96799e-07	6.09865	2.04139	57
3	p14.1	SLC25A26	NM_173471	66119284	66429351	0.723964	0.727476	BRCA	3p	del	tel	p	1	p	0.95	65741880	81650776	0.719688	0.899911	0.334728	4.60988e-09	8.33631	7.96799e-07	6.09865	2.04139	57
3	p14.1	LRIG1	NM_015541	66429220	66550845	0.727475	0.728852	BRCA	3p	del	tel	p	1	p	0.95	65741880	81650776	0.719688	0.899911	0.334728	4.60988e-09	8.33631	7.96799e-07	6.09865	2.04139	57
3	p14.1	LOC105377143	NR_135533	66780801	66788760	0.731457	0.731548	BRCA	3p	del	tel	p	1	p	0.95	65741880	81650776	0.719688	0.899911	0.334728	4.60988e-09	8.33631	7.96799e-07	6.09865	2.04139	57
3	p14.1	KBTBD8	NM_032505	67048726	67061632	0.734493	0.734639	BRCA	3p	del	tel	p	1	p	0.95	65741880	81650776	0.719688	0.899911	0.334728	4.60988e-09	8.33631	7.96799e-07	6.09865	2.04139	57
3	p14.1	MIR4272	NR_036234	67275887	67275951	0.737066	0.737067	BRCA	3p	del	tel	p	1	p	0.95	65741880	81650776	0.719688	0.899911	0.334728	4.60988e-09	8.33631	7.96799e-07	6.09865	2.04139	57
3	p14.1	SUCLG2	NM_001177599	67410883	67705038	0.738595	0.741928	BRCA	3p	del	tel	p	1	p	0.95	65741880	81650776	0.719688	0.899911	0.334728	4.60988e-09	8.33631	7.96799e-07	6.09865	2.04139	57
3	p14.1	SUCLG2-AS1	NR_109992	67705120	67998136	0.741929	0.745248	BRCA	3p	del	tel	p	1	p	0.95	65741880	81650776	0.719688	0.899911	0.334728	4.60988e-09	8.33631	7.96799e-07	6.09865	2.04139	57
3	p14.1	FAM19A1	NM_001252216	68040733	68594771	0.745731	0.752007	BRCA	3p	del	tel	p	1	p	0.95	65741880	81650776	0.719688	0.899911	0.334728	4.60988e-09	8.33631	7.96799e-07	6.09865	2.04139	57
3	p14.1	LOC105377146	NR_135532	68549787	68555023	0.751497	0.751557	BRCA	3p	del	tel	p	1	p	0.95	65741880	81650776	0.719688	0.899911	0.334728	4.60988e-09	8.33631	7.96799e-07	6.09865	2.04139	57
3	p14.1	FAM19A4	NM_001005527	68780914	68981761	0.754116	0.756391	BRCA	3p	del	tel	p	1	p	0.95	65741880	81650776	0.719688	0.899911	0.334728	4.60988e-09	8.33631	7.96799e-07	6.09865	2.04139	57
3	p14.1	EOGT	NM_001278689	69024362	69063045	0.756874	0.757312	BRCA	3p	del	tel	p	1	p	0.95	65741880	81650776	0.719688	0.899911	0.334728	4.60988e-09	8.33631	7.96799e-07	6.09865	2.04139	57
3	p14.1	TMF1	NM_007114	69068977	69101484	0.757379	0.757747	BRCA	3p	del	tel	p	1	p	0.95	65741880	81650776	0.719688	0.899911	0.334728	4.60988e-09	8.33631	7.96799e-07	6.09865	2.04139	57
3	p14.1	MIR3136	NR_036087	69098108	69098186	0.757709	0.75771	BRCA	3p	del	tel	p	1	p	0.95	65741880	81650776	0.719688	0.899911	0.334728	4.60988e-09	8.33631	7.96799e-07	6.09865	2.04139	57
3	p14.1	UBA3	NM_003968	69103880	69129524	0.757774	0.758065	BRCA	3p	del	tel	p	1	p	0.95	65741880	81650776	0.719688	0.899911	0.334728	4.60988e-09	8.33631	7.96799e-07	6.09865	2.04139	57
3	p14.1	ARL6IP5	NM_006407	69134089	69155239	0.758117	0.758356	BRCA	3p	del	tel	p	1	p	0.95	65741880	81650776	0.719688	0.899911	0.334728	4.60988e-09	8.33631	7.96799e-07	6.09865	2.04139	57
3	p14.1	LMOD3	NM_001304418	69157822	69171746	0.758385	0.758543	BRCA	3p	del	tel	p	1	p	0.95	65741880	81650776	0.719688	0.899911	0.334728	4.60988e-09	8.33631	7.96799e-07	6.09865	2.04139	57
3	p14.1	FRMD4B	NM_015123	69217933	69435455	0.759066	0.761531	BRCA	3p	del	tel	p	1	p	0.95	65741880	81650776	0.719688	0.899911	0.334728	4.60988e-09	8.33631	7.96799e-07	6.09865	2.04139	57
3	p13	MITF	NM_001354608	69788585	70017488	0.765531	0.768124	BRCA	3p	del	tel	p	1	p	0.95	65741880	81650776	0.719688	0.899911	0.334728	4.60988e-09	8.33631	7.96799e-07	6.09865	2.04139	57
3	p13	SAMMSON	NR_110000	70048894	70064451	0.76848	0.768656	BRCA	3p	del	tel	p	1	p	0.95	65741880	81650776	0.719688	0.899911	0.334728	4.60988e-09	8.33631	7.96799e-07	6.09865	2.04139	57
3	p13	FOXP1	NM_001244810	71003864	71633140	0.779298	0.786427	BRCA	3p	del	tel	p	1	p	0.95	65741880	81650776	0.719688	0.899911	0.334728	4.60988e-09	8.33631	7.96799e-07	6.09865	2.04139	57
3	p13	FOXP1-AS1	NR_126463	71338908	71355005	0.783094	0.783276	BRCA	3p	del	tel	p	1	p	0.95	65741880	81650776	0.719688	0.899911	0.334728	4.60988e-09	8.33631	7.96799e-07	6.09865	2.04139	57
3	p13	MIR1284	NR_031697	71591120	71591240	0.785951	0.785952	BRCA	3p	del	tel	p	1	p	0.95	65741880	81650776	0.719688	0.899911	0.334728	4.60988e-09	8.33631	7.96799e-07	6.09865	2.04139	57
3	p13	EIF4E3	NM_173359	71728439	71803924	0.787506	0.788362	BRCA	3p	del	tel	p	1	p	0.95	65741880	81650776	0.719688	0.899911	0.334728	4.60988e-09	8.33631	7.96799e-07	6.09865	2.04139	57
3	p13	GPR27	NM_018971	71802874	71805531	0.78835	0.78838	BRCA	3p	del	tel	p	1	p	0.95	65741880	81650776	0.719688	0.899911	0.334728	4.60988e-09	8.33631	7.96799e-07	6.09865	2.04139	57
3	p13	PROK2	NM_021935	71820805	71834357	0.788553	0.788706	BRCA	3p	del	tel	p	1	p	0.95	65741880	81650776	0.719688	0.899911	0.334728	4.60988e-09	8.33631	7.96799e-07	6.09865	2.04139	57
3	p13	LINC00877	NR_104116	72084669	72149606	0.791542	0.792278	BRCA	3p	del	tel	p	1	p	0.95	65741880	81650776	0.719688	0.899911	0.334728	4.60988e-09	8.33631	7.96799e-07	6.09865	2.04139	57
3	p13	LINC00870	NR_038221	72200407	72223490	0.792853	0.793115	BRCA	3p	del	tel	p	1	p	0.95	65741880	81650776	0.719688	0.899911	0.334728	4.60988e-09	8.33631	7.96799e-07	6.09865	2.04139	57
3	p13	RYBP	NM_012234	72423743	72495774	0.795383	0.796199	BRCA	3p	del	tel	p	1	p	0.95	65741880	81650776	0.719688	0.899911	0.334728	4.60988e-09	8.33631	7.96799e-07	6.09865	2.04139	57
3	p13	LOC105377162	NR_135531	72712446	72713400	0.798654	0.798665	BRCA	3p	del	tel	p	1	p	0.95	65741880	81650776	0.719688	0.899911	0.334728	4.60988e-09	8.33631	7.96799e-07	6.09865	2.04139	57
3	p13	SHQ1	NM_018130	72798427	72897598	0.799628	0.800751	BRCA	3p	del	tel	p	1	p	0.95	65741880	81650776	0.719688	0.899911	0.334728	4.60988e-09	8.33631	7.96799e-07	6.09865	2.04139	57
3	p13	GXYLT2	NR_138564	72937384	73024522	0.801202	0.802189	BRCA	3p	del	tel	p	1	p	0.95	65741880	81650776	0.719688	0.899911	0.334728	4.60988e-09	8.33631	7.96799e-07	6.09865	2.04139	57
3	p13	PPP4R2	NM_001318026	73045893	73118352	0.802431	0.803252	BRCA	3p	del	tel	p	1	p	0.95	65741880	81650776	0.719688	0.899911	0.334728	4.60988e-09	8.33631	7.96799e-07	6.09865	2.04139	57
3	p13	EBLN2	NM_018029	73110809	73112471	0.803167	0.803185	BRCA	3p	del	tel	p	1	p	0.95	65741880	81650776	0.719688	0.899911	0.334728	4.60988e-09	8.33631	7.96799e-07	6.09865	2.04139	57
3	p13	PDZRN3	NM_015009	73431580	73674072	0.8068	0.809547	BRCA	3p	del	tel	p	1	p	0.95	65741880	81650776	0.719688	0.899911	0.334728	4.60988e-09	8.33631	7.96799e-07	6.09865	2.04139	57
3	p13	LOC101927296	NR_121660	73570472	73618925	0.808374	0.808923	BRCA	3p	del	tel	p	1	p	0.95	65741880	81650776	0.719688	0.899911	0.334728	4.60988e-09	8.33631	7.96799e-07	6.09865	2.04139	57
3	p13	PDZRN3-AS1	NR_046681	73672718	73677050	0.809532	0.809581	BRCA	3p	del	tel	p	1	p	0.95	65741880	81650776	0.719688	0.899911	0.334728	4.60988e-09	8.33631	7.96799e-07	6.09865	2.04139	57
3	p13	LINC02005	NR_146637	73858394	73928771	0.811636	0.812433	BRCA	3p	del	tel	p	1	p	0.95	65741880	81650776	0.719688	0.899911	0.334728	4.60988e-09	8.33631	7.96799e-07	6.09865	2.04139	57
3	p12.3	CNTN3	NM_020872	74311719	74570291	0.816771	0.8197	BRCA	3p	del	tel	p	1	p	0.95	65741880	81650776	0.719688	0.899911	0.334728	4.60988e-09	8.33631	7.96799e-07	6.09865	2.04139	57
3	p12.3	FAM86DP	NR_024241	75470702	75484266	0.8299	0.830054	BRCA	3p	del	tel	p	1	p	0.95	65741880	81650776	0.719688	0.899911	0.334728	4.60988e-09	8.33631	7.96799e-07	6.09865	2.04139	57
3	p12.3	LINC02018	NR_151705	75484458	75561328	0.830056	0.830927	BRCA	3p	del	tel	p	1	p	0.95	65741880	81650776	0.719688	0.899911	0.334728	4.60988e-09	8.33631	7.96799e-07	6.09865	2.04139	57
3	p12.3	MIR1324	NR_031714	75679913	75680009	0.832271	0.832272	BRCA	3p	del	tel	p	1	p	0.95	65741880	81650776	0.719688	0.899911	0.334728	4.60988e-09	8.33631	7.96799e-07	6.09865	2.04139	57
3	p12.3	FRG2C	NM_001124759	75713341	75716368	0.832649	0.832684	BRCA	3p	del	tel	p	1	p	0.95	65741880	81650776	0.719688	0.899911	0.334728	4.60988e-09	8.33631	7.96799e-07	6.09865	2.04139	57
3	p12.3	FRG2EP	NR_037925	75713480	75716368	0.832651	0.832684	BRCA	3p	del	tel	p	1	p	0.95	65741880	81650776	0.719688	0.899911	0.334728	4.60988e-09	8.33631	7.96799e-07	6.09865	2.04139	57
3	p12.3	LINC00960	NR_040005	75721431	75728454	0.832741	0.83282	BRCA	3p	del	tel	p	1	p	0.95	65741880	81650776	0.719688	0.899911	0.334728	4.60988e-09	8.33631	7.96799e-07	6.09865	2.04139	57
3	p12.3	ZNF717	NM_001290210	75779111	75834734	0.833394	0.834024	BRCA	3p	del	tel	p	1	p	0.95	65741880	81650776	0.719688	0.899911	0.334728	4.60988e-09	8.33631	7.96799e-07	6.09865	2.04139	57
3	p12.3	MIR4273	NR_036235	75787430	75787514	0.833489	0.833489	BRCA	3p	del	tel	p	1	p	0.95	65741880	81650776	0.719688	0.899911	0.334728	4.60988e-09	8.33631	7.96799e-07	6.09865	2.04139	57
3	p12.3	ROBO2	NM_002942	77089293	77699114	0.848237	0.855145	BRCA	3p	del	tel	p	1	p	0.95	65741880	81650776	0.719688	0.899911	0.334728	4.60988e-09	8.33631	7.96799e-07	6.09865	2.04139	57
3	p12.3	LINC02077	NR_146636	78087855	78098114	0.859549	0.859665	BRCA	3p	del	tel	p	1	p	0.95	65741880	81650776	0.719688	0.899911	0.334728	4.60988e-09	8.33631	7.96799e-07	6.09865	2.04139	57
3	p12.3	ROBO1	NM_002941	78646387	79817059	0.865876	0.879138	BRCA	3p	del	tel	p	1	p	0.95	65741880	81650776	0.719688	0.899911	0.334728	4.60988e-09	8.33631	7.96799e-07	6.09865	2.04139	57
3	p12.3	LOC101927374	NR_110133	79460876	79484377	0.875103	0.875369	BRCA	3p	del	tel	p	1	p	0.95	65741880	81650776	0.719688	0.899911	0.334728	4.60988e-09	8.33631	7.96799e-07	6.09865	2.04139	57
3	p12.3	MIR3923	NR_037488	79557036	79557119	0.876192	0.876193	BRCA	3p	del	tel	p	1	p	0.95	65741880	81650776	0.719688	0.899911	0.334728	4.60988e-09	8.33631	7.96799e-07	6.09865	2.04139	57
3	p12.2	LINC02050	NR_147143	80814047	80838539	0.890432	0.89071	BRCA	3p	del	tel	p	1	p	0.95	65741880	81650776	0.719688	0.899911	0.334728	4.60988e-09	8.33631	7.96799e-07	6.09865	2.04139	57
3	p12.2	LINC02027	NR_132411	81043018	81144798	0.893026	0.894179	BRCA	3p	del	tel	p	1	p	0.95	65741880	81650776	0.719688	0.899911	0.334728	4.60988e-09	8.33631	7.96799e-07	6.09865	2.04139	57
3	p12.2	GBE1	NM_000158	81538849	81810950	0.898643	0.901726	BRCA	3p	del	tel	p	1	p	0.95	65741880	81650776	0.719688	0.899911	0.334728	4.60988e-09	8.33631	7.96799e-07	6.09865	2.04139	57
14	q21.3	RPS29	NM_001030001	50037701	50053134	0.654492	0.654311	BRCA	14	del	tel	n	2	p-rn	0.95	49534063	51332727	0.639343	0.660383	0.322571	8.59835e-09	8.06558	1.41527e-06	5.84916	1.88677	25
14	q21.3	LRR1	NM_203467	50065414	50081390	0.654168	0.653981	BRCA	14	del	tel	n	2	p-rn	0.95	49534063	51332727	0.639343	0.660383	0.322571	8.59835e-09	8.06558	1.41527e-06	5.84916	1.88677	25
14	q21.3	RPL36AL	NM_001001	50085405	50087403	0.653934	0.653911	BRCA	14	del	tel	n	2	p-rn	0.95	49534063	51332727	0.639343	0.660383	0.322571	8.59835e-09	8.06558	1.41527e-06	5.84916	1.88677	25
14	q21.3	MGAT2	NM_002408	50087488	50090199	0.65391	0.653878	BRCA	14	del	tel	n	2	p-rn	0.95	49534063	51332727	0.639343	0.660383	0.322571	8.59835e-09	8.06558	1.41527e-06	5.84916	1.88677	25
14	q21.3	DNAAF2	NM_001083908	50091891	50101948	0.653858	0.65374	BRCA	14	del	tel	n	2	p-rn	0.95	49534063	51332727	0.639343	0.660383	0.322571	8.59835e-09	8.06558	1.41527e-06	5.84916	1.88677	25
14	q21.3	POLE2	NM_001348385	50110269	50155098	0.653643	0.653119	BRCA	14	del	tel	n	2	p-rn	0.95	49534063	51332727	0.639343	0.660383	0.322571	8.59835e-09	8.06558	1.41527e-06	5.84916	1.88677	25
14	q21.3	KLHDC1	NM_172193	50159822	50219870	0.653063	0.652361	BRCA	14	del	tel	n	2	p-rn	0.95	49534063	51332727	0.639343	0.660383	0.322571	8.59835e-09	8.06558	1.41527e-06	5.84916	1.88677	25
14	q21.3	KLHDC2	NM_014315	50234786	50249856	0.652186	0.65201	BRCA	14	del	tel	n	2	p-rn	0.95	49534063	51332727	0.639343	0.660383	0.322571	8.59835e-09	8.06558	1.41527e-06	5.84916	1.88677	25
14	q21.3	NEMF	NM_004713	50250238	50319921	0.652006	0.651191	BRCA	14	del	tel	n	2	p-rn	0.95	49534063	51332727	0.639343	0.660383	0.322571	8.59835e-09	8.06558	1.41527e-06	5.84916	1.88677	25
14	q21.3	RN7SL3	NR_145670	50320333	50320632	0.651186	0.651182	BRCA	14	del	tel	n	2	p-rn	0.95	49534063	51332727	0.639343	0.660383	0.322571	8.59835e-09	8.06558	1.41527e-06	5.84916	1.88677	25
14	q21.3	ARF6	NM_001663	50359735	50363772	0.650725	0.650678	BRCA	14	del	tel	n	2	p-rn	0.95	49534063	51332727	0.639343	0.660383	0.322571	8.59835e-09	8.06558	1.41527e-06	5.84916	1.88677	25
14	q21.3	MIR6076	NR_106724	50433116	50433229	0.649866	0.649865	BRCA	14	del	tel	n	2	p-rn	0.95	49534063	51332727	0.639343	0.660383	0.322571	8.59835e-09	8.06558	1.41527e-06	5.84916	1.88677	25
14	q21.3	LINC01588	NR_126498	50448386	50474238	0.649688	0.649385	BRCA	14	del	tel	n	2	p-rn	0.95	49534063	51332727	0.639343	0.660383	0.322571	8.59835e-09	8.06558	1.41527e-06	5.84916	1.88677	25
14	q21.3	LINC01599	NR_131171	50474030	50571761	0.649388	0.648245	BRCA	14	del	tel	n	2	p-rn	0.95	49534063	51332727	0.639343	0.660383	0.322571	8.59835e-09	8.06558	1.41527e-06	5.84916	1.88677	25
14	q21.3	VCPKMT	NR_049738	50575349	50583297	0.648203	0.64811	BRCA	14	del	tel	n	2	p-rn	0.95	49534063	51332727	0.639343	0.660383	0.322571	8.59835e-09	8.06558	1.41527e-06	5.84916	1.88677	25
14	q21.3	SOS2	NM_006939	50583838	50698411	0.648103	0.646763	BRCA	14	del	tel	n	2	p-rn	0.95	49534063	51332727	0.639343	0.660383	0.322571	8.59835e-09	8.06558	1.41527e-06	5.84916	1.88677	25
14	q21.3	L2HGDH	NM_024884	50709151	50778947	0.646637	0.645821	BRCA	14	del	tel	n	2	p-rn	0.95	49534063	51332727	0.639343	0.660383	0.322571	8.59835e-09	8.06558	1.41527e-06	5.84916	1.88677	25
14	q21.3	MIR4504	NR_039726	50766572	50766664	0.645966	0.645965	BRCA	14	del	tel	n	2	p-rn	0.95	49534063	51332727	0.639343	0.660383	0.322571	8.59835e-09	8.06558	1.41527e-06	5.84916	1.88677	25
14	q21.3	ATP5S	NR_033761	50779046	50792946	0.64582	0.645657	BRCA	14	del	tel	n	2	p-rn	0.95	49534063	51332727	0.639343	0.660383	0.322571	8.59835e-09	8.06558	1.41527e-06	5.84916	1.88677	25
14	q21.3	CDKL1	NM_004196	50796308	50862642	0.645618	0.644842	BRCA	14	del	tel	n	2	p-rn	0.95	49534063	51332727	0.639343	0.660383	0.322571	8.59835e-09	8.06558	1.41527e-06	5.84916	1.88677	25
14	q22.1	MAP4K5	NM_006575	50885210	50999376	0.644578	0.643243	BRCA	14	del	tel	n	2	p-rn	0.95	49534063	51332727	0.639343	0.660383	0.322571	8.59835e-09	8.06558	1.41527e-06	5.84916	1.88677	25
14	q22.1	ATL1	NM_001127713	50999799	51099784	0.643238	0.642068	BRCA	14	del	tel	n	2	p-rn	0.95	49534063	51332727	0.639343	0.660383	0.322571	8.59835e-09	8.06558	1.41527e-06	5.84916	1.88677	25
14	q22.1	SAV1	NM_021818	51100297	51135071	0.642062	0.641655	BRCA	14	del	tel	n	2	p-rn	0.95	49534063	51332727	0.639343	0.660383	0.322571	8.59835e-09	8.06558	1.41527e-06	5.84916	1.88677	25
14	q22.1	NIN	NM_020921	51186480	51297839	0.641054	0.639751	BRCA	14	del	tel	n	2	p-rn	0.95	49534063	51332727	0.639343	0.660383	0.322571	8.59835e-09	8.06558	1.41527e-06	5.84916	1.88677	25
14	q22.1	LOC105370489	NR_135258	51288514	51290226	0.63986	0.63984	BRCA	14	del	tel	n	2	p-rn	0.95	49534063	51332727	0.639343	0.660383	0.322571	8.59835e-09	8.06558	1.41527e-06	5.84916	1.88677	25
17	q24.1	CEP112	NM_001353128	63631657	64188349	0.310628	0.300624	BRCA	17q	del	tel	n	1	n	0.95	63903118	72971019	0.142794	0.30575	0.342548	7.54898e-08	7.12211	1.05346e-05	4.97738	1.70499	98
17	q24.2	APOH	NM_000042	64208146	64225556	0.300268	0.299955	BRCA	17q	del	tel	n	1	n	0.95	63903118	72971019	0.142794	0.30575	0.342548	7.54898e-08	7.12211	1.05346e-05	4.97738	1.70499	98
17	q24.2	PRKCA	NM_002737	64298925	64806862	0.298637	0.289509	BRCA	17q	del	tel	n	1	n	0.95	63903118	72971019	0.142794	0.30575	0.342548	7.54898e-08	7.12211	1.05346e-05	4.97738	1.70499	98
17	q24.2	PRKCA-AS1	NR_110822	64394186	64412972	0.296925	0.296587	BRCA	17q	del	tel	n	1	n	0.95	63903118	72971019	0.142794	0.30575	0.342548	7.54898e-08	7.12211	1.05346e-05	4.97738	1.70499	98
17	q24.2	MIR634	NR_030364	64783189	64783286	0.289934	0.289933	BRCA	17q	del	tel	n	1	n	0.95	63903118	72971019	0.142794	0.30575	0.342548	7.54898e-08	7.12211	1.05346e-05	4.97738	1.70499	98
17	q24.2	CACNG5	NM_145811	64873390	64881395	0.288313	0.288169	BRCA	17q	del	tel	n	1	n	0.95	63903118	72971019	0.142794	0.30575	0.342548	7.54898e-08	7.12211	1.05346e-05	4.97738	1.70499	98
17	q24.2	CACNG4	NM_014405	64960979	65029518	0.286739	0.285508	BRCA	17q	del	tel	n	1	n	0.95	63903118	72971019	0.142794	0.30575	0.342548	7.54898e-08	7.12211	1.05346e-05	4.97738	1.70499	98
17	q24.2	CACNG1	NM_000727	65040651	65052911	0.285308	0.285087	BRCA	17q	del	tel	n	1	n	0.95	63903118	72971019	0.142794	0.30575	0.342548	7.54898e-08	7.12211	1.05346e-05	4.97738	1.70499	98
17	q24.2	HELZ	NM_001330447	65066553	65241320	0.284842	0.281701	BRCA	17q	del	tel	n	1	n	0.95	63903118	72971019	0.142794	0.30575	0.342548	7.54898e-08	7.12211	1.05346e-05	4.97738	1.70499	98
17	q24.2	LOC101928021	NR_136398	65240891	65258196	0.281709	0.281398	BRCA	17q	del	tel	n	1	n	0.95	63903118	72971019	0.142794	0.30575	0.342548	7.54898e-08	7.12211	1.05346e-05	4.97738	1.70499	98
17	q24.2	PSMD12	NM_002816	65334031	65362743	0.280035	0.279519	BRCA	17q	del	tel	n	1	n	0.95	63903118	72971019	0.142794	0.30575	0.342548	7.54898e-08	7.12211	1.05346e-05	4.97738	1.70499	98
17	q24.2	PITPNC1	NM_181671	65373396	65693379	0.279328	0.273578	BRCA	17q	del	tel	n	1	n	0.95	63903118	72971019	0.142794	0.30575	0.342548	7.54898e-08	7.12211	1.05346e-05	4.97738	1.70499	98
17	q24.2	MIR548AA2	NR_037517	65467604	65467701	0.277635	0.277633	BRCA	17q	del	tel	n	1	n	0.95	63903118	72971019	0.142794	0.30575	0.342548	7.54898e-08	7.12211	1.05346e-05	4.97738	1.70499	98
17	q24.2	MIR548D2	NR_030385	65467606	65467701	0.277635	0.277633	BRCA	17q	del	tel	n	1	n	0.95	63903118	72971019	0.142794	0.30575	0.342548	7.54898e-08	7.12211	1.05346e-05	4.97738	1.70499	98
17	q24.2	NOL11	NM_015462	65713948	65740324	0.273208	0.272734	BRCA	17q	del	tel	n	1	n	0.95	63903118	72971019	0.142794	0.30575	0.342548	7.54898e-08	7.12211	1.05346e-05	4.97738	1.70499	98
17	q24.2	SNORA38B	NR_003706	65736785	65736917	0.272798	0.272795	BRCA	17q	del	tel	n	1	n	0.95	63903118	72971019	0.142794	0.30575	0.342548	7.54898e-08	7.12211	1.05346e-05	4.97738	1.70499	98
17	q24.2	BPTF	NM_004459	65821779	65980494	0.27127	0.268418	BRCA	17q	del	tel	n	1	n	0.95	63903118	72971019	0.142794	0.30575	0.342548	7.54898e-08	7.12211	1.05346e-05	4.97738	1.70499	98
17	q24.2	C17orf58	NM_181656	65987214	65989765	0.268297	0.268251	BRCA	17q	del	tel	n	1	n	0.95	63903118	72971019	0.142794	0.30575	0.342548	7.54898e-08	7.12211	1.05346e-05	4.97738	1.70499	98
17	q24.2	KPNA2	NM_002266	66031717	66042975	0.267497	0.267295	BRCA	17q	del	tel	n	1	n	0.95	63903118	72971019	0.142794	0.30575	0.342548	7.54898e-08	7.12211	1.05346e-05	4.97738	1.70499	98
17	q24.2	LINC00674	NR_027418	66097695	66132070	0.266312	0.265694	BRCA	17q	del	tel	n	1	n	0.95	63903118	72971019	0.142794	0.30575	0.342548	7.54898e-08	7.12211	1.05346e-05	4.97738	1.70499	98
17	q24.2	ARHGAP27P2	NR_027283	66194800	66196443	0.264567	0.264537	BRCA	17q	del	tel	n	1	n	0.95	63903118	72971019	0.142794	0.30575	0.342548	7.54898e-08	7.12211	1.05346e-05	4.97738	1.70499	98
17	q24.2	AMZ2	NM_001346481	66202269	66253305	0.264433	0.263515	BRCA	17q	del	tel	n	1	n	0.95	63903118	72971019	0.142794	0.30575	0.342548	7.54898e-08	7.12211	1.05346e-05	4.97738	1.70499	98
17	q24.2	ARSG	NM_001352904	66255322	66425514	0.263479	0.260421	BRCA	17q	del	tel	n	1	n	0.95	63903118	72971019	0.142794	0.30575	0.342548	7.54898e-08	7.12211	1.05346e-05	4.97738	1.70499	98
17	q24.2	SLC16A6	NM_001174166	66263166	66287405	0.263338	0.262903	BRCA	17q	del	tel	n	1	n	0.95	63903118	72971019	0.142794	0.30575	0.342548	7.54898e-08	7.12211	1.05346e-05	4.97738	1.70499	98
17	q24.2	PRKAR1A	NM_001278433	66409763	66529570	0.260704	0.258551	BRCA	17q	del	tel	n	1	n	0.95	63903118	72971019	0.142794	0.30575	0.342548	7.54898e-08	7.12211	1.05346e-05	4.97738	1.70499	98
17	q24.2	WIPI1	NR_135470	66417421	66453665	0.260566	0.259915	BRCA	17q	del	tel	n	1	n	0.95	63903118	72971019	0.142794	0.30575	0.342548	7.54898e-08	7.12211	1.05346e-05	4.97738	1.70499	98
17	q24.2	MIR635	NR_030365	66420591	66420689	0.260509	0.260507	BRCA	17q	del	tel	n	1	n	0.95	63903118	72971019	0.142794	0.30575	0.342548	7.54898e-08	7.12211	1.05346e-05	4.97738	1.70499	98
17	q24.2	FAM20A	NM_017565	66531256	66597095	0.25852	0.257337	BRCA	17q	del	tel	n	1	n	0.95	63903118	72971019	0.142794	0.30575	0.342548	7.54898e-08	7.12211	1.05346e-05	4.97738	1.70499	98
17	q24.2	LINC01482	NR_110825	66624294	66675747	0.256849	0.255924	BRCA	17q	del	tel	n	1	n	0.95	63903118	72971019	0.142794	0.30575	0.342548	7.54898e-08	7.12211	1.05346e-05	4.97738	1.70499	98
17	q24.2	ABCA8	NM_001288985	66863427	66951533	0.252551	0.250968	BRCA	17q	del	tel	n	1	n	0.95	63903118	72971019	0.142794	0.30575	0.342548	7.54898e-08	7.12211	1.05346e-05	4.97738	1.70499	98
17	q24.2	ABCA9	NM_080283	66970772	67057136	0.250622	0.24907	BRCA	17q	del	tel	n	1	n	0.95	63903118	72971019	0.142794	0.30575	0.342548	7.54898e-08	7.12211	1.05346e-05	4.97738	1.70499	98
17	q24.2	ABCA9-AS1	NR_126414	67000854	67014464	0.250082	0.249837	BRCA	17q	del	tel	n	1	n	0.95	63903118	72971019	0.142794	0.30575	0.342548	7.54898e-08	7.12211	1.05346e-05	4.97738	1.70499	98
17	q24.3	ABCA6	NM_080284	67074846	67138015	0.248752	0.247617	BRCA	17q	del	tel	n	1	n	0.95	63903118	72971019	0.142794	0.30575	0.342548	7.54898e-08	7.12211	1.05346e-05	4.97738	1.70499	98
17	q24.2	MIR4524B	NR_049834	67095682	67095797	0.248377	0.248375	BRCA	17q	del	tel	n	1	n	0.95	63903118	72971019	0.142794	0.30575	0.342548	7.54898e-08	7.12211	1.05346e-05	4.97738	1.70499	98
17	q24.2	MIR4524A	NR_039750	67095704	67095773	0.248377	0.248376	BRCA	17q	del	tel	n	1	n	0.95	63903118	72971019	0.142794	0.30575	0.342548	7.54898e-08	7.12211	1.05346e-05	4.97738	1.70499	98
17	q24.3	ABCA10	NM_080282	67144147	67240956	0.247506	0.245767	BRCA	17q	del	tel	n	1	n	0.95	63903118	72971019	0.142794	0.30575	0.342548	7.54898e-08	7.12211	1.05346e-05	4.97738	1.70499	98
17	q24.3	PRO1804	NR_130736	67229115	67231153	0.24598	0.245943	BRCA	17q	del	tel	n	1	n	0.95	63903118	72971019	0.142794	0.30575	0.342548	7.54898e-08	7.12211	1.05346e-05	4.97738	1.70499	98
17	q24.3	ABCA5	NM_172232	67240575	67323323	0.245774	0.244287	BRCA	17q	del	tel	n	1	n	0.95	63903118	72971019	0.142794	0.30575	0.342548	7.54898e-08	7.12211	1.05346e-05	4.97738	1.70499	98
17	q24.3	MAP2K6	NM_002758	67410837	67538470	0.242714	0.24042	BRCA	17q	del	tel	n	1	n	0.95	63903118	72971019	0.142794	0.30575	0.342548	7.54898e-08	7.12211	1.05346e-05	4.97738	1.70499	98
17	q24.3	LOC105371880	NR_145982	67471394	67481673	0.241626	0.241441	BRCA	17q	del	tel	n	1	n	0.95	63903118	72971019	0.142794	0.30575	0.342548	7.54898e-08	7.12211	1.05346e-05	4.97738	1.70499	98
17	q24.3	LINC01483	NR_109971	67590127	67899141	0.239492	0.233939	BRCA	17q	del	tel	n	1	n	0.95	63903118	72971019	0.142794	0.30575	0.342548	7.54898e-08	7.12211	1.05346e-05	4.97738	1.70499	98
17	q24.3	LINC01497	NR_110874	67957847	67979685	0.232884	0.232491	BRCA	17q	del	tel	n	1	n	0.95	63903118	72971019	0.142794	0.30575	0.342548	7.54898e-08	7.12211	1.05346e-05	4.97738	1.70499	98
17	q24.3	LINC01028	NR_104129	68047411	68064236	0.231274	0.230972	BRCA	17q	del	tel	n	1	n	0.95	63903118	72971019	0.142794	0.30575	0.342548	7.54898e-08	7.12211	1.05346e-05	4.97738	1.70499	98
17	q24.3	KCNJ16	NM_018658	68071365	68131746	0.230844	0.229759	BRCA	17q	del	tel	n	1	n	0.95	63903118	72971019	0.142794	0.30575	0.342548	7.54898e-08	7.12211	1.05346e-05	4.97738	1.70499	98
17	q24.3	KCNJ2-AS1	NR_036534	68163101	68165543	0.229195	0.229151	BRCA	17q	del	tel	n	1	n	0.95	63903118	72971019	0.142794	0.30575	0.342548	7.54898e-08	7.12211	1.05346e-05	4.97738	1.70499	98
17	q24.3	KCNJ2	NM_000891	68165675	68176183	0.229149	0.22896	BRCA	17q	del	tel	n	1	n	0.95	63903118	72971019	0.142794	0.30575	0.342548	7.54898e-08	7.12211	1.05346e-05	4.97738	1.70499	98
17	q24.3	CASC17	NR_104152	69093914	69198320	0.212468	0.210592	BRCA	17q	del	tel	n	1	n	0.95	63903118	72971019	0.142794	0.30575	0.342548	7.54898e-08	7.12211	1.05346e-05	4.97738	1.70499	98
17	q24.3	ROCR	NR_110876	70017991	70022120	0.195862	0.195788	BRCA	17q	del	tel	n	1	n	0.95	63903118	72971019	0.142794	0.30575	0.342548	7.54898e-08	7.12211	1.05346e-05	4.97738	1.70499	98
17	q24.3	LINC01152	NR_110132	70026794	70037438	0.195704	0.195512	BRCA	17q	del	tel	n	1	n	0.95	63903118	72971019	0.142794	0.30575	0.342548	7.54898e-08	7.12211	1.05346e-05	4.97738	1.70499	98
17	q24.3	LOC102723517	NR_110877	70030247	70053875	0.195642	0.195217	BRCA	17q	del	tel	n	1	n	0.95	63903118	72971019	0.142794	0.30575	0.342548	7.54898e-08	7.12211	1.05346e-05	4.97738	1.70499	98
17	q24.3	SOX9-AS1	NR_103738	70067182	70112157	0.194978	0.19417	BRCA	17q	del	tel	n	1	n	0.95	63903118	72971019	0.142794	0.30575	0.342548	7.54898e-08	7.12211	1.05346e-05	4.97738	1.70499	98
17	q24.3	LINC02097	NR_110827	70068473	70089622	0.194955	0.194575	BRCA	17q	del	tel	n	1	n	0.95	63903118	72971019	0.142794	0.30575	0.342548	7.54898e-08	7.12211	1.05346e-05	4.97738	1.70499	98
17	q24.3	SOX9	NM_000346	70117160	70122560	0.19408	0.193983	BRCA	17q	del	tel	n	1	n	0.95	63903118	72971019	0.142794	0.30575	0.342548	7.54898e-08	7.12211	1.05346e-05	4.97738	1.70499	98
17	q24.3	LINC02003	NR_135222	70338951	70351277	0.190094	0.189872	BRCA	17q	del	tel	n	1	n	0.95	63903118	72971019	0.142794	0.30575	0.342548	7.54898e-08	7.12211	1.05346e-05	4.97738	1.70499	98
17	q24.3	LINC00673	NR_137280	70399462	70588943	0.189007	0.185601	BRCA	17q	del	tel	n	1	n	0.95	63903118	72971019	0.142794	0.30575	0.342548	7.54898e-08	7.12211	1.05346e-05	4.97738	1.70499	98
17	q24.3	LINC00511	NR_033876	70594179	70636611	0.185507	0.184745	BRCA	17q	del	tel	n	1	n	0.95	63903118	72971019	0.142794	0.30575	0.342548	7.54898e-08	7.12211	1.05346e-05	4.97738	1.70499	98
17	q24.3	SLC39A11	NM_001159770	70642084	71088853	0.184647	0.176618	BRCA	17q	del	tel	n	1	n	0.95	63903118	72971019	0.142794	0.30575	0.342548	7.54898e-08	7.12211	1.05346e-05	4.97738	1.70499	98
17	q25.1	SSTR2	NM_001050	71161159	71168062	0.175318	0.175194	BRCA	17q	del	tel	n	1	n	0.95	63903118	72971019	0.142794	0.30575	0.342548	7.54898e-08	7.12211	1.05346e-05	4.97738	1.70499	98
17	q25.1	COG1	NM_018714	71189172	71204645	0.174815	0.174537	BRCA	17q	del	tel	n	1	n	0.95	63903118	72971019	0.142794	0.30575	0.342548	7.54898e-08	7.12211	1.05346e-05	4.97738	1.70499	98
17	q25.1	FAM104A	NM_032837	71203491	71228533	0.174558	0.174108	BRCA	17q	del	tel	n	1	n	0.95	63903118	72971019	0.142794	0.30575	0.342548	7.54898e-08	7.12211	1.05346e-05	4.97738	1.70499	98
17	q25.1	C17orf80	NM_001351264	71228228	71245095	0.174113	0.17381	BRCA	17q	del	tel	n	1	n	0.95	63903118	72971019	0.142794	0.30575	0.342548	7.54898e-08	7.12211	1.05346e-05	4.97738	1.70499	98
17	q25.1	CPSF4L	NM_001129885	71244587	71258019	0.173819	0.173578	BRCA	17q	del	tel	n	1	n	0.95	63903118	72971019	0.142794	0.30575	0.342548	7.54898e-08	7.12211	1.05346e-05	4.97738	1.70499	98
17	q25.1	CDC42EP4	NM_012121	71279762	71308143	0.173187	0.172677	BRCA	17q	del	tel	n	1	n	0.95	63903118	72971019	0.142794	0.30575	0.342548	7.54898e-08	7.12211	1.05346e-05	4.97738	1.70499	98
17	q25.1	SDK2	NM_001144952	71330522	71640227	0.172275	0.166709	BRCA	17q	del	tel	n	1	n	0.95	63903118	72971019	0.142794	0.30575	0.342548	7.54898e-08	7.12211	1.05346e-05	4.97738	1.70499	98
17	q25.1	LOC101928251	NR_135635	71509821	71514909	0.169053	0.168961	BRCA	17q	del	tel	n	1	n	0.95	63903118	72971019	0.142794	0.30575	0.342548	7.54898e-08	7.12211	1.05346e-05	4.97738	1.70499	98
17	q25.1	LOC100134391	NM_001278587	71733992	71752696	0.165024	0.164688	BRCA	17q	del	tel	n	1	n	0.95	63903118	72971019	0.142794	0.30575	0.342548	7.54898e-08	7.12211	1.05346e-05	4.97738	1.70499	98
17	q25.1	LINC00469	NR_027146	71745408	71824676	0.164819	0.163395	BRCA	17q	del	tel	n	1	n	0.95	63903118	72971019	0.142794	0.30575	0.342548	7.54898e-08	7.12211	1.05346e-05	4.97738	1.70499	98
17	q25.1	LINC02092	NR_040020	71782960	71796934	0.164144	0.163893	BRCA	17q	del	tel	n	1	n	0.95	63903118	72971019	0.142794	0.30575	0.342548	7.54898e-08	7.12211	1.05346e-05	4.97738	1.70499	98
17	q25.1	RPL38	NM_001035258	72199794	72206019	0.156654	0.156542	BRCA	17q	del	tel	n	1	n	0.95	63903118	72971019	0.142794	0.30575	0.342548	7.54898e-08	7.12211	1.05346e-05	4.97738	1.70499	98
17	q25.1	MGC16275	NR_026914	72206134	72209460	0.15654	0.15648	BRCA	17q	del	tel	n	1	n	0.95	63903118	72971019	0.142794	0.30575	0.342548	7.54898e-08	7.12211	1.05346e-05	4.97738	1.70499	98
17	q25.1	TTYH2	NM_032646	72209695	72258157	0.156476	0.155605	BRCA	17q	del	tel	n	1	n	0.95	63903118	72971019	0.142794	0.30575	0.342548	7.54898e-08	7.12211	1.05346e-05	4.97738	1.70499	98
17	q25.1	DNAI2	NM_023036	72270348	72311023	0.155386	0.154655	BRCA	17q	del	tel	n	1	n	0.95	63903118	72971019	0.142794	0.30575	0.342548	7.54898e-08	7.12211	1.05346e-05	4.97738	1.70499	98
17	q25.1	KIF19	NM_153209	72322350	72351959	0.154451	0.153919	BRCA	17q	del	tel	n	1	n	0.95	63903118	72971019	0.142794	0.30575	0.342548	7.54898e-08	7.12211	1.05346e-05	4.97738	1.70499	98
17	q25.1	BTBD17	NM_001080466	72352555	72358007	0.153908	0.15381	BRCA	17q	del	tel	n	1	n	0.95	63903118	72971019	0.142794	0.30575	0.342548	7.54898e-08	7.12211	1.05346e-05	4.97738	1.70499	98
17	q25.1	GPR142	NM_001331077	72363644	72368739	0.153709	0.153618	BRCA	17q	del	tel	n	1	n	0.95	63903118	72971019	0.142794	0.30575	0.342548	7.54898e-08	7.12211	1.05346e-05	4.97738	1.70499	98
17	q25.1	GPRC5C	NM_022036	72427666	72443568	0.152559	0.152273	BRCA	17q	del	tel	n	1	n	0.95	63903118	72971019	0.142794	0.30575	0.342548	7.54898e-08	7.12211	1.05346e-05	4.97738	1.70499	98
17	q25.1	CD300A	NM_001330457	72462511	72480937	0.151932	0.151601	BRCA	17q	del	tel	n	1	n	0.95	63903118	72971019	0.142794	0.30575	0.342548	7.54898e-08	7.12211	1.05346e-05	4.97738	1.70499	98
17	q25.1	CD300LB	NM_174892	72517312	72527613	0.150948	0.150762	BRCA	17q	del	tel	n	1	n	0.95	63903118	72971019	0.142794	0.30575	0.342548	7.54898e-08	7.12211	1.05346e-05	4.97738	1.70499	98
17	q25.1	CD300C	NM_006678	72537204	72542310	0.15059	0.150498	BRCA	17q	del	tel	n	1	n	0.95	63903118	72971019	0.142794	0.30575	0.342548	7.54898e-08	7.12211	1.05346e-05	4.97738	1.70499	98
17	q25.1	CD300H	NM_001324073	72556839	72563482	0.150237	0.150118	BRCA	17q	del	tel	n	1	n	0.95	63903118	72971019	0.142794	0.30575	0.342548	7.54898e-08	7.12211	1.05346e-05	4.97738	1.70499	98
17	q25.1	LOC100130520	NM_001324076	72556839	72563482	0.150237	0.150118	BRCA	17q	del	tel	n	1	n	0.95	63903118	72971019	0.142794	0.30575	0.342548	7.54898e-08	7.12211	1.05346e-05	4.97738	1.70499	98
17	q25.1	CD300LD	NM_001115152	72575503	72588422	0.149902	0.14967	BRCA	17q	del	tel	n	1	n	0.95	63903118	72971019	0.142794	0.30575	0.342548	7.54898e-08	7.12211	1.05346e-05	4.97738	1.70499	98
17	q25.1	C17orf77	NM_001302809	72580817	72590348	0.149806	0.149635	BRCA	17q	del	tel	n	1	n	0.95	63903118	72971019	0.142794	0.30575	0.342548	7.54898e-08	7.12211	1.05346e-05	4.97738	1.70499	98
17	q25.1	CD300E	NM_181449	72606021	72619897	0.149353	0.149104	BRCA	17q	del	tel	n	1	n	0.95	63903118	72971019	0.142794	0.30575	0.342548	7.54898e-08	7.12211	1.05346e-05	4.97738	1.70499	98
17	q25.1	RAB37	NM_175738	72667255	72743474	0.148253	0.146883	BRCA	17q	del	tel	n	1	n	0.95	63903118	72971019	0.142794	0.30575	0.342548	7.54898e-08	7.12211	1.05346e-05	4.97738	1.70499	98
17	q25.1	CD300LF	NM_001289087	72690446	72709139	0.147836	0.1475	BRCA	17q	del	tel	n	1	n	0.95	63903118	72971019	0.142794	0.30575	0.342548	7.54898e-08	7.12211	1.05346e-05	4.97738	1.70499	98
17	q25.1	SLC9A3R1	NM_004252	72744750	72765499	0.14686	0.146488	BRCA	17q	del	tel	n	1	n	0.95	63903118	72971019	0.142794	0.30575	0.342548	7.54898e-08	7.12211	1.05346e-05	4.97738	1.70499	98
17	q25.1	MIR3615	NR_037409	72744751	72744838	0.14686	0.146859	BRCA	17q	del	tel	n	1	n	0.95	63903118	72971019	0.142794	0.30575	0.342548	7.54898e-08	7.12211	1.05346e-05	4.97738	1.70499	98
17	q25.1	NAT9	NM_001305088	72766667	72772564	0.146467	0.146361	BRCA	17q	del	tel	n	1	n	0.95	63903118	72971019	0.142794	0.30575	0.342548	7.54898e-08	7.12211	1.05346e-05	4.97738	1.70499	98
17	q25.1	TMEM104	NM_001321264	72772621	72835922	0.14636	0.145222	BRCA	17q	del	tel	n	1	n	0.95	63903118	72971019	0.142794	0.30575	0.342548	7.54898e-08	7.12211	1.05346e-05	4.97738	1.70499	98
17	q25.1	GRIN2C	NR_103735	72838161	72856007	0.145182	0.144861	BRCA	17q	del	tel	n	1	n	0.95	63903118	72971019	0.142794	0.30575	0.342548	7.54898e-08	7.12211	1.05346e-05	4.97738	1.70499	98
17	q25.1	FDXR	NM_001258015	72858618	72869156	0.144814	0.144625	BRCA	17q	del	tel	n	1	n	0.95	63903118	72971019	0.142794	0.30575	0.342548	7.54898e-08	7.12211	1.05346e-05	4.97738	1.70499	98
17	q25.1	FADS6	NM_178128	72873441	72889909	0.144548	0.144252	BRCA	17q	del	tel	n	1	n	0.95	63903118	72971019	0.142794	0.30575	0.342548	7.54898e-08	7.12211	1.05346e-05	4.97738	1.70499	98
17	q25.1	USH1G	NM_001282489	72912175	72919358	0.143852	0.143723	BRCA	17q	del	tel	n	1	n	0.95	63903118	72971019	0.142794	0.30575	0.342548	7.54898e-08	7.12211	1.05346e-05	4.97738	1.70499	98
17	q25.1	OTOP2	NM_178160	72920369	72930006	0.143704	0.143531	BRCA	17q	del	tel	n	1	n	0.95	63903118	72971019	0.142794	0.30575	0.342548	7.54898e-08	7.12211	1.05346e-05	4.97738	1.70499	98
17	q25.1	OTOP3	NM_001272005	72931896	72946087	0.143497	0.143242	BRCA	17q	del	tel	n	1	n	0.95	63903118	72971019	0.142794	0.30575	0.342548	7.54898e-08	7.12211	1.05346e-05	4.97738	1.70499	98
17	q25.1	HID1	NM_030630	72946838	72968900	0.143229	0.142832	BRCA	17q	del	tel	n	1	n	0.95	63903118	72971019	0.142794	0.30575	0.342548	7.54898e-08	7.12211	1.05346e-05	4.97738	1.70499	98
17	q25.1	HID1-AS1	NR_110878	72966783	72971823	0.14287	0.14278	BRCA	17q	del	tel	n	1	n	0.95	63903118	72971019	0.142794	0.30575	0.342548	7.54898e-08	7.12211	1.05346e-05	4.97738	1.70499	98
1	p21.3	PLPPR5	NM_001037317	99355800	99470449	0.819523	0.8205	BRCA	1p	del	tel	p	2	n-rp	0.95	99413369	102944572	0.820013	0.850115	0.273876	1.38027e-08	7.86003	2.21937e-06	5.65377	1.54843	30
1	p21.3	LOC100129620	NR_033940	99469831	99614408	0.820495	0.821727	BRCA	1p	del	tel	p	2	n-rp	0.95	99413369	102944572	0.820013	0.850115	0.273876	1.38027e-08	7.86003	2.21937e-06	5.65377	1.54843	30
1	p21.2	PLPPR4	NM_014839	99729847	99775138	0.822711	0.823097	BRCA	1p	del	tel	p	2	n-rp	0.95	99413369	102944572	0.820013	0.850115	0.273876	1.38027e-08	7.86003	2.21937e-06	5.65377	1.54843	30
1	p21.2	LINC01708	NR_125951	99937975	99953360	0.824486	0.824617	BRCA	1p	del	tel	p	2	n-rp	0.95	99413369	102944572	0.820013	0.850115	0.273876	1.38027e-08	7.86003	2.21937e-06	5.65377	1.54843	30
1	p21.2	PALMD	NM_017734	100111430	100160097	0.825964	0.826379	BRCA	1p	del	tel	p	2	n-rp	0.95	99413369	102944572	0.820013	0.850115	0.273876	1.38027e-08	7.86003	2.21937e-06	5.65377	1.54843	30
1	p21.2	MIR548AA1	NR_037516	100154610	100178513	0.826332	0.826536	BRCA	1p	del	tel	p	2	n-rp	0.95	99413369	102944572	0.820013	0.850115	0.273876	1.38027e-08	7.86003	2.21937e-06	5.65377	1.54843	30
1	p21.2	FRRS1	NM_001013660	100174258	100231349	0.8265	0.826986	BRCA	1p	del	tel	p	2	n-rp	0.95	99413369	102944572	0.820013	0.850115	0.273876	1.38027e-08	7.86003	2.21937e-06	5.65377	1.54843	30
1	p21.2	AGL	NM_000642	100315639	100389579	0.827705	0.828335	BRCA	1p	del	tel	p	2	n-rp	0.95	99413369	102944572	0.820013	0.850115	0.273876	1.38027e-08	7.86003	2.21937e-06	5.65377	1.54843	30
1	p21.2	SLC35A3	NM_012243	100435344	100492534	0.828725	0.829213	BRCA	1p	del	tel	p	2	n-rp	0.95	99413369	102944572	0.820013	0.850115	0.273876	1.38027e-08	7.86003	2.21937e-06	5.65377	1.54843	30
1	p21.2	MFSD14A	NM_033055	100503788	100548929	0.829309	0.829694	BRCA	1p	del	tel	p	2	n-rp	0.95	99413369	102944572	0.820013	0.850115	0.273876	1.38027e-08	7.86003	2.21937e-06	5.65377	1.54843	30
1	p21.2	SASS6	NM_194292	100549100	100598651	0.829695	0.830117	BRCA	1p	del	tel	p	2	n-rp	0.95	99413369	102944572	0.820013	0.850115	0.273876	1.38027e-08	7.86003	2.21937e-06	5.65377	1.54843	30
1	p21.2	TRMT13	NR_135078	100598705	100616054	0.830118	0.830266	BRCA	1p	del	tel	p	2	n-rp	0.95	99413369	102944572	0.820013	0.850115	0.273876	1.38027e-08	7.86003	2.21937e-06	5.65377	1.54843	30
1	p21.2	LRRC39	NM_001256387	100614003	100643829	0.830248	0.830503	BRCA	1p	del	tel	p	2	n-rp	0.95	99413369	102944572	0.820013	0.850115	0.273876	1.38027e-08	7.86003	2.21937e-06	5.65377	1.54843	30
1	p21.2	DBT	NM_001918	100652477	100715409	0.830576	0.831113	BRCA	1p	del	tel	p	2	n-rp	0.95	99413369	102944572	0.820013	0.850115	0.273876	1.38027e-08	7.86003	2.21937e-06	5.65377	1.54843	30
1	p21.2	RTCA-AS1	NR_110434	100730297	100731730	0.83124	0.831252	BRCA	1p	del	tel	p	2	n-rp	0.95	99413369	102944572	0.820013	0.850115	0.273876	1.38027e-08	7.86003	2.21937e-06	5.65377	1.54843	30
1	p21.2	RTCA	NM_003729	100731713	100758325	0.831252	0.831479	BRCA	1p	del	tel	p	2	n-rp	0.95	99413369	102944572	0.820013	0.850115	0.273876	1.38027e-08	7.86003	2.21937e-06	5.65377	1.54843	30
1	p21.2	MIR553	NR_030279	100746796	100746864	0.83138	0.831381	BRCA	1p	del	tel	p	2	n-rp	0.95	99413369	102944572	0.820013	0.850115	0.273876	1.38027e-08	7.86003	2.21937e-06	5.65377	1.54843	30
1	p21.2	CDC14A	NM_001319210	100818022	100985833	0.831987	0.833418	BRCA	1p	del	tel	p	2	n-rp	0.95	99413369	102944572	0.820013	0.850115	0.273876	1.38027e-08	7.86003	2.21937e-06	5.65377	1.54843	30
1	p21.2	GPR88	NM_022049	101003727	101007583	0.833571	0.833603	BRCA	1p	del	tel	p	2	n-rp	0.95	99413369	102944572	0.820013	0.850115	0.273876	1.38027e-08	7.86003	2.21937e-06	5.65377	1.54843	30
1	p21.2	LINC01349	NR_038914	101092605	101112560	0.834328	0.834498	BRCA	1p	del	tel	p	2	n-rp	0.95	99413369	102944572	0.820013	0.850115	0.273876	1.38027e-08	7.86003	2.21937e-06	5.65377	1.54843	30
1	p21.2	VCAM1	NM_001199834	101185195	101204601	0.835117	0.835283	BRCA	1p	del	tel	p	2	n-rp	0.95	99413369	102944572	0.820013	0.850115	0.273876	1.38027e-08	7.86003	2.21937e-06	5.65377	1.54843	30
1	p21.2	EXTL2	NR_048570	101337927	101360735	0.836419	0.836614	BRCA	1p	del	tel	p	2	n-rp	0.95	99413369	102944572	0.820013	0.850115	0.273876	1.38027e-08	7.86003	2.21937e-06	5.65377	1.54843	30
1	p21.2	SLC30A7	NM_001144884	101361631	101447311	0.836621	0.837352	BRCA	1p	del	tel	p	2	n-rp	0.95	99413369	102944572	0.820013	0.850115	0.273876	1.38027e-08	7.86003	2.21937e-06	5.65377	1.54843	30
1	p21.2	DPH5	NM_015958	101455179	101491362	0.837419	0.837727	BRCA	1p	del	tel	p	2	n-rp	0.95	99413369	102944572	0.820013	0.850115	0.273876	1.38027e-08	7.86003	2.21937e-06	5.65377	1.54843	30
1	p21.2	LOC102606465	NR_109849	101491401	101552935	0.837728	0.838252	BRCA	1p	del	tel	p	2	n-rp	0.95	99413369	102944572	0.820013	0.850115	0.273876	1.38027e-08	7.86003	2.21937e-06	5.65377	1.54843	30
1	p21.2	LOC101928370	NR_104626	101700428	101702084	0.83951	0.839524	BRCA	1p	del	tel	p	2	n-rp	0.95	99413369	102944572	0.820013	0.850115	0.273876	1.38027e-08	7.86003	2.21937e-06	5.65377	1.54843	30
1	p21.2	S1PR1	NM_001400	101702304	101707076	0.839526	0.839566	BRCA	1p	del	tel	p	2	n-rp	0.95	99413369	102944572	0.820013	0.850115	0.273876	1.38027e-08	7.86003	2.21937e-06	5.65377	1.54843	30
1	p21.2	LINC01307	NR_126402	101789392	101842869	0.840268	0.840724	BRCA	1p	del	tel	p	2	n-rp	0.95	99413369	102944572	0.820013	0.850115	0.273876	1.38027e-08	7.86003	2.21937e-06	5.65377	1.54843	30
1	p21.1	OLFM3	NR_110210	102268122	102462790	0.844349	0.846008	BRCA	1p	del	tel	p	2	n-rp	0.95	99413369	102944572	0.820013	0.850115	0.273876	1.38027e-08	7.86003	2.21937e-06	5.65377	1.54843	30
1	p21.1	DNAJA1P5	NR_033424	102337567	102360299	0.844941	0.845135	BRCA	1p	del	tel	p	2	n-rp	0.95	99413369	102944572	0.820013	0.850115	0.273876	1.38027e-08	7.86003	2.21937e-06	5.65377	1.54843	30
5	q21.2	RAB9BP1	NR_000039	104435174	104435799	0.582984	0.582979	BRCA	5q	amp	tel	n	1	n	0.95	103980992	137527916	0.328885	0.586472	0.310305	1.67042e-07	6.77717	2.1747e-05	4.6626	1.44683	213
5	q21.3	LINC01950	NR_104671	106150897	106346715	0.56981	0.568307	BRCA	5q	amp	tel	n	1	n	0.95	103980992	137527916	0.328885	0.586472	0.310305	1.67042e-07	6.77717	2.1747e-05	4.6626	1.44683	213
5	q21.3	EFNA5	NM_001962	106712589	107006596	0.565497	0.56324	BRCA	5q	amp	tel	n	1	n	0.95	103980992	137527916	0.328885	0.586472	0.310305	1.67042e-07	6.77717	2.1747e-05	4.6626	1.44683	213
5	q21.3	FBXL17	NM_001163315	107194733	107717799	0.561795	0.557779	BRCA	5q	amp	tel	n	1	n	0.95	103980992	137527916	0.328885	0.586472	0.310305	1.67042e-07	6.77717	2.1747e-05	4.6626	1.44683	213
5	q21.3	LINC01023	NR_046368	108063525	108063962	0.555124	0.555121	BRCA	5q	amp	tel	n	1	n	0.95	103980992	137527916	0.328885	0.586472	0.310305	1.67042e-07	6.77717	2.1747e-05	4.6626	1.44683	213
5	q21.3	FER	NM_005246	108083522	108532541	0.554971	0.551523	BRCA	5q	amp	tel	n	1	n	0.95	103980992	137527916	0.328885	0.586472	0.310305	1.67042e-07	6.77717	2.1747e-05	4.6626	1.44683	213
5	q21.3	LOC285638	NR_149040	108572835	108662070	0.551214	0.550528	BRCA	5q	amp	tel	n	1	n	0.95	103980992	137527916	0.328885	0.586472	0.310305	1.67042e-07	6.77717	2.1747e-05	4.6626	1.44683	213
5	q21.3	PJA2	NM_014819	108670409	108745675	0.550464	0.549886	BRCA	5q	amp	tel	n	1	n	0.95	103980992	137527916	0.328885	0.586472	0.310305	1.67042e-07	6.77717	2.1747e-05	4.6626	1.44683	213
5	q21.3	MAN2A1	NM_002372	109025066	109205326	0.547741	0.546357	BRCA	5q	amp	tel	n	1	n	0.95	103980992	137527916	0.328885	0.586472	0.310305	1.67042e-07	6.77717	2.1747e-05	4.6626	1.44683	213
5	q21.3	LINC01848	NR_033175	109218882	109220604	0.546253	0.54624	BRCA	5q	amp	tel	n	1	n	0.95	103980992	137527916	0.328885	0.586472	0.310305	1.67042e-07	6.77717	2.1747e-05	4.6626	1.44683	213
5	q22.1	TMEM232	NM_001039763	109755197	110062450	0.542135	0.539776	BRCA	5q	amp	tel	n	1	n	0.95	103980992	137527916	0.328885	0.586472	0.310305	1.67042e-07	6.77717	2.1747e-05	4.6626	1.44683	213
5	q22.1	SLC25A46	NM_001303250	110073836	110100874	0.539688	0.539481	BRCA	5q	amp	tel	n	1	n	0.95	103980992	137527916	0.328885	0.586472	0.310305	1.67042e-07	6.77717	2.1747e-05	4.6626	1.44683	213
5	q22.1	TSLP	NR_045089	110405777	110413722	0.537139	0.537078	BRCA	5q	amp	tel	n	1	n	0.95	103980992	137527916	0.328885	0.586472	0.310305	1.67042e-07	6.77717	2.1747e-05	4.6626	1.44683	213
5	q22.1	WDR36	NM_139281	110427869	110466200	0.53697	0.536676	BRCA	5q	amp	tel	n	1	n	0.95	103980992	137527916	0.328885	0.586472	0.310305	1.67042e-07	6.77717	2.1747e-05	4.6626	1.44683	213
5	q22.1	CAMK4	NM_001323375	110559350	110830582	0.53596	0.533878	BRCA	5q	amp	tel	n	1	n	0.95	103980992	137527916	0.328885	0.586472	0.310305	1.67042e-07	6.77717	2.1747e-05	4.6626	1.44683	213
5	q22.1	STARD4	NR_131754	110831731	110848295	0.533869	0.533742	BRCA	5q	amp	tel	n	1	n	0.95	103980992	137527916	0.328885	0.586472	0.310305	1.67042e-07	6.77717	2.1747e-05	4.6626	1.44683	213
5	q22.1	STARD4-AS1	NR_040093	110847923	111075423	0.533745	0.531998	BRCA	5q	amp	tel	n	1	n	0.95	103980992	137527916	0.328885	0.586472	0.310305	1.67042e-07	6.77717	2.1747e-05	4.6626	1.44683	213
5	q22.1	NREP	NM_001142475	111064999	111312628	0.532078	0.530176	BRCA	5q	amp	tel	n	1	n	0.95	103980992	137527916	0.328885	0.586472	0.310305	1.67042e-07	6.77717	2.1747e-05	4.6626	1.44683	213
5	q22.1	NREP-AS1	NR_046678	111248204	111353003	0.530671	0.529866	BRCA	5q	amp	tel	n	1	n	0.95	103980992	137527916	0.328885	0.586472	0.310305	1.67042e-07	6.77717	2.1747e-05	4.6626	1.44683	213
5	q22.2	EPB41L4A	NM_001347887	111478138	111755013	0.528905	0.52678	BRCA	5q	amp	tel	n	1	n	0.95	103980992	137527916	0.328885	0.586472	0.310305	1.67042e-07	6.77717	2.1747e-05	4.6626	1.44683	213
5	q22.1	EPB41L4A-AS1	NR_015370	111496222	111498198	0.528767	0.528751	BRCA	5q	amp	tel	n	1	n	0.95	103980992	137527916	0.328885	0.586472	0.310305	1.67042e-07	6.77717	2.1747e-05	4.6626	1.44683	213
5	q22.1	SNORA13	NR_002922	111497181	111497314	0.528759	0.528758	BRCA	5q	amp	tel	n	1	n	0.95	103980992	137527916	0.328885	0.586472	0.310305	1.67042e-07	6.77717	2.1747e-05	4.6626	1.44683	213
5	q22.2	LOC101927023	NR_110559	111563979	111593006	0.528246	0.528023	BRCA	5q	amp	tel	n	1	n	0.95	103980992	137527916	0.328885	0.586472	0.310305	1.67042e-07	6.77717	2.1747e-05	4.6626	1.44683	213
5	q22.2	EPB41L4A-AS2	NR_027706	111755279	111756677	0.526777	0.526767	BRCA	5q	amp	tel	n	1	n	0.95	103980992	137527916	0.328885	0.586472	0.310305	1.67042e-07	6.77717	2.1747e-05	4.6626	1.44683	213
5	q22.2	LINC02200	NR_104672	111964132	111966618	0.525174	0.525155	BRCA	5q	amp	tel	n	1	n	0.95	103980992	137527916	0.328885	0.586472	0.310305	1.67042e-07	6.77717	2.1747e-05	4.6626	1.44683	213
5	q22.2	LOC102467216	NR_104673	111992124	112018585	0.524959	0.524756	BRCA	5q	amp	tel	n	1	n	0.95	103980992	137527916	0.328885	0.586472	0.310305	1.67042e-07	6.77717	2.1747e-05	4.6626	1.44683	213
5	q22.2	APC	NM_001354897	112043201	112181936	0.524567	0.523501	BRCA	5q	amp	tel	n	1	n	0.95	103980992	137527916	0.328885	0.586472	0.310305	1.67042e-07	6.77717	2.1747e-05	4.6626	1.44683	213
5	q22.2	SRP19	NM_001204199	112196884	112228776	0.523387	0.523142	BRCA	5q	amp	tel	n	1	n	0.95	103980992	137527916	0.328885	0.586472	0.310305	1.67042e-07	6.77717	2.1747e-05	4.6626	1.44683	213
5	q22.2	REEP5	NM_005669	112212080	112258031	0.52327	0.522917	BRCA	5q	amp	tel	n	1	n	0.95	103980992	137527916	0.328885	0.586472	0.310305	1.67042e-07	6.77717	2.1747e-05	4.6626	1.44683	213
5	q22.2	DCP2	NM_001242377	112312406	112357892	0.5225	0.52215	BRCA	5q	amp	tel	n	1	n	0.95	103980992	137527916	0.328885	0.586472	0.310305	1.67042e-07	6.77717	2.1747e-05	4.6626	1.44683	213
5	q22.2	MCC	NM_001085377	112357795	112824527	0.522151	0.518567	BRCA	5q	amp	tel	n	1	n	0.95	103980992	137527916	0.328885	0.586472	0.310305	1.67042e-07	6.77717	2.1747e-05	4.6626	1.44683	213
[truncated: 32,167 more rows]

## Sheet: Table S4d
Table S4d
List of genes under selection across diploid (DIPLOID) and whole genome doubled (WGD) samples, with peak information. Peaks are sorted from largest to smallest by Significance Score (combined_sig). Genes are sorted by genomic location.
Start, End = hg19 start and end of gene
Start.1, End.1 = start and end of gene as fraction of chromosome arm (starting in telomere if tSCNA; starting in centromere if cSCNA)
iter = # of iteration
code = unique identifier for each peak; each element separated by a dash represents an iteration. First iteration is always "n" or "p" (for negative or positive), and next iterations include "l" or "r" (for left or right) along with "n" or "p".
Peak.Start, Peak.End = hg19 start and end of BrISCUT peak
Peak.Start.1, Peak.End.1 = start and end of BrISCUT peak as fraction of chromosome arm
ks_stat = Kolmogorov-Smirnov statistic
ks_p = Kolmogorov-Smirnov p-value
log10_ks_p = log10 of KS p-value
ks_by = Kolmogorov-Smirnov q-value (multiple hypothesis correction by the Benjamini-Yekutieli method)
log10_ksby = log10 of KS q-value
combined_sig = log10_ksby * ks_stat = Significance Score
num_genes = number of genes in peak
Chr	Cytoband	Gene	RefSeqName	Start	End	Start.1	End.1	type	arm	direction	telcent	negpos	iter	code	conf	Peak.Start	Peak.End	Peak.Start.1	Peak.End.1	ks_stat	ks_p	log10_ks_p	ksby	log10_ksby	combined_sig	num_genes
8	q24.13	LOC105375744	NR_134457	126009230	126010440	0.196614	0.196602	DIPLOID	8q	del	tel	n	1	n	0.95	125999170	128762863	0.16845	0.196717	0.506509	0	inf	0	16	8.10414	19
8	q24.13	SQLE	NM_003129	126010719	126034525	0.196599	0.196355	DIPLOID	8q	del	tel	n	1	n	0.95	125999170	128762863	0.16845	0.196717	0.506509	0	inf	0	16	8.10414	19
8	q24.13	WASHC5	NM_001330609	126036502	126104061	0.196335	0.195644	DIPLOID	8q	del	tel	n	1	n	0.95	125999170	128762863	0.16845	0.196717	0.506509	0	inf	0	16	8.10414	19
8	q24.13	NSMCE2	NM_001349485	126104064	126379367	0.195644	0.192828	DIPLOID	8q	del	tel	n	1	n	0.95	125999170	128762863	0.16845	0.196717	0.506509	0	inf	0	16	8.10414	19
8	q24.13	TRIB1	NM_025195	126442562	126450647	0.192182	0.192099	DIPLOID	8q	del	tel	n	1	n	0.95	125999170	128762863	0.16845	0.196717	0.506509	0	inf	0	16	8.10414	19
8	q24.13	LINC00861	NR_038447	126934766	126963441	0.187148	0.186855	DIPLOID	8q	del	tel	n	1	n	0.95	125999170	128762863	0.16845	0.196717	0.506509	0	inf	0	16	8.10414	19
8	q24.21	LOC101927657	NR_125421	127337739	127341778	0.183026	0.182985	DIPLOID	8q	del	tel	n	1	n	0.95	125999170	128762863	0.16845	0.196717	0.506509	0	inf	0	16	8.10414	19
8	q24.21	FAM84B	NM_174911	127564682	127570711	0.180705	0.180643	DIPLOID	8q	del	tel	n	1	n	0.95	125999170	128762863	0.16845	0.196717	0.506509	0	inf	0	16	8.10414	19
8	q24.21	PCAT1	NR_045262	128025398	128033259	0.175993	0.175912	DIPLOID	8q	del	tel	n	1	n	0.95	125999170	128762863	0.16845	0.196717	0.506509	0	inf	0	16	8.10414	19
8	q24.21	PCAT2	NR_119373	128084938	128094466	0.175384	0.175286	DIPLOID	8q	del	tel	n	1	n	0.95	125999170	128762863	0.16845	0.196717	0.506509	0	inf	0	16	8.10414	19
8	q24.21	PRNCR1	NR_109833	128092118	128104840	0.17531	0.17518	DIPLOID	8q	del	tel	n	1	n	0.95	125999170	128762863	0.16845	0.196717	0.506509	0	inf	0	16	8.10414	19
8	q24.21	CASC19	NR_120364	128200030	128209872	0.174207	0.174106	DIPLOID	8q	del	tel	n	1	n	0.95	125999170	128762863	0.16845	0.196717	0.506509	0	inf	0	16	8.10414	19
8	q24.21	CCAT1	NR_108049	128219626	128231513	0.174006	0.173885	DIPLOID	8q	del	tel	n	1	n	0.95	125999170	128762863	0.16845	0.196717	0.506509	0	inf	0	16	8.10414	19
8	q24.21	CASC21	NR_117099	128256881	128404876	0.173625	0.172112	DIPLOID	8q	del	tel	n	1	n	0.95	125999170	128762863	0.16845	0.196717	0.506509	0	inf	0	16	8.10414	19
8	q24.21	CASC8	NR_117100	128301920	128494384	0.173165	0.171196	DIPLOID	8q	del	tel	n	1	n	0.95	125999170	128762863	0.16845	0.196717	0.506509	0	inf	0	16	8.10414	19
8	q24.21	CCAT2	NR_109834	128412643	128414395	0.172032	0.172014	DIPLOID	8q	del	tel	n	1	n	0.95	125999170	128762863	0.16845	0.196717	0.506509	0	inf	0	16	8.10414	19
8	q24.21	POU5F1B	NM_001159542	128427856	128429441	0.171877	0.17186	DIPLOID	8q	del	tel	n	1	n	0.95	125999170	128762863	0.16845	0.196717	0.506509	0	inf	0	16	8.10414	19
8	q24.21	CASC11	NR_117102	128712852	128746213	0.168962	0.16862	DIPLOID	8q	del	tel	n	1	n	0.95	125999170	128762863	0.16845	0.196717	0.506509	0	inf	0	16	8.10414	19
8	q24.21	MYC	NM_001354870	128747679	128755197	0.168605	0.168529	DIPLOID	8q	del	tel	n	1	n	0.95	125999170	128762863	0.16845	0.196717	0.506509	0	inf	0	16	8.10414	19
3	q26.2	PHC3	NM_024947	169805367	169899537	0.26717	0.266263	DIPLOID	3q	del	tel	n	1	n	0.95	169832115	179784455	0.171036	0.266912	0.465557	0	inf	0	16	7.44891	52
3	q26.2	PRKCI	NM_002740	169940219	170023770	0.265871	0.265066	DIPLOID	3q	del	tel	n	1	n	0.95	169832115	179784455	0.171036	0.266912	0.465557	0	inf	0	16	7.44891	52
3	q26.2	SKIL	NM_001145098	170075472	170114637	0.264568	0.264191	DIPLOID	3q	del	tel	n	1	n	0.95	169832115	179784455	0.171036	0.266912	0.465557	0	inf	0	16	7.44891	52
3	q26.2	CLDN11	NM_005602	170136652	170152479	0.263978	0.263826	DIPLOID	3q	del	tel	n	1	n	0.95	169832115	179784455	0.171036	0.266912	0.465557	0	inf	0	16	7.44891	52
3	q26.2	MIR6828	NR_106886	170140890	170140950	0.263938	0.263937	DIPLOID	3q	del	tel	n	1	n	0.95	169832115	179784455	0.171036	0.266912	0.465557	0	inf	0	16	7.44891	52
3	q26.2	SLC7A14	NM_020949	170177341	170303863	0.263587	0.262368	DIPLOID	3q	del	tel	n	1	n	0.95	169832115	179784455	0.171036	0.266912	0.465557	0	inf	0	16	7.44891	52
3	q26.2	LOC101928583	NR_135556	170185072	170472994	0.263512	0.260738	DIPLOID	3q	del	tel	n	1	n	0.95	169832115	179784455	0.171036	0.266912	0.465557	0	inf	0	16	7.44891	52
3	q26.2	RPL22L1	NM_001099645	170582664	170588045	0.259682	0.25963	DIPLOID	3q	del	tel	n	1	n	0.95	169832115	179784455	0.171036	0.266912	0.465557	0	inf	0	16	7.44891	52
3	q26.2	EIF5A2	NM_020390	170606203	170626426	0.259455	0.25926	DIPLOID	3q	del	tel	n	1	n	0.95	169832115	179784455	0.171036	0.266912	0.465557	0	inf	0	16	7.44891	52
3	q26.2	SLC2A2	NM_001278659	170714136	170744768	0.258415	0.25812	DIPLOID	3q	del	tel	n	1	n	0.95	169832115	179784455	0.171036	0.266912	0.465557	0	inf	0	16	7.44891	52
3	q26.31	TNIK	NM_015028	170776202	171178197	0.257817	0.253945	DIPLOID	3q	del	tel	n	1	n	0.95	169832115	179784455	0.171036	0.266912	0.465557	0	inf	0	16	7.44891	52
3	q26.2	MIR569	NR_030295	170824452	170824548	0.257353	0.257352	DIPLOID	3q	del	tel	n	1	n	0.95	169832115	179784455	0.171036	0.266912	0.465557	0	inf	0	16	7.44891	52
3	q26.31	PLD1	NM_001130081	171318194	171528284	0.252596	0.250572	DIPLOID	3q	del	tel	n	1	n	0.95	169832115	179784455	0.171036	0.266912	0.465557	0	inf	0	16	7.44891	52
3	q26.31	TMEM212	NM_001164436	171561138	171577108	0.250256	0.250102	DIPLOID	3q	del	tel	n	1	n	0.95	169832115	179784455	0.171036	0.266912	0.465557	0	inf	0	16	7.44891	52
3	q26.31	TMEM212-AS1	NR_046852	171594141	171618530	0.249938	0.249703	DIPLOID	3q	del	tel	n	1	n	0.95	169832115	179784455	0.171036	0.266912	0.465557	0	inf	0	16	7.44891	52
3	q26.31	FNDC3B	NM_022763	171757417	172118492	0.248365	0.244886	DIPLOID	3q	del	tel	n	1	n	0.95	169832115	179784455	0.171036	0.266912	0.465557	0	inf	0	16	7.44891	52
3	q26.31	GHSR	NM_198407	172161080	172166246	0.244476	0.244426	DIPLOID	3q	del	tel	n	1	n	0.95	169832115	179784455	0.171036	0.266912	0.465557	0	inf	0	16	7.44891	52
3	q26.31	TNFSF10	NM_001190942	172223297	172241297	0.243877	0.243703	DIPLOID	3q	del	tel	n	1	n	0.95	169832115	179784455	0.171036	0.266912	0.465557	0	inf	0	16	7.44891	52
3	q26.31	LINC02068	NR_146714	172278690	172313397	0.243343	0.243009	DIPLOID	3q	del	tel	n	1	n	0.95	169832115	179784455	0.171036	0.266912	0.465557	0	inf	0	16	7.44891	52
3	q26.31	NCEH1	NM_020792	172348434	172429008	0.242671	0.241895	DIPLOID	3q	del	tel	n	1	n	0.95	169832115	179784455	0.171036	0.266912	0.465557	0	inf	0	16	7.44891	52
3	q26.31	ECT2	NM_001258316	172468474	172539264	0.241515	0.240833	DIPLOID	3q	del	tel	n	1	n	0.95	169832115	179784455	0.171036	0.266912	0.465557	0	inf	0	16	7.44891	52
3	q26.31	SPATA16	NM_031955	172607146	172859058	0.240179	0.237752	DIPLOID	3q	del	tel	n	1	n	0.95	169832115	179784455	0.171036	0.266912	0.465557	0	inf	0	16	7.44891	52
3	q26.31	NLGN1	NM_014932	173116237	174001139	0.235275	0.22675	DIPLOID	3q	del	tel	n	1	n	0.95	169832115	179784455	0.171036	0.266912	0.465557	0	inf	0	16	7.44891	52
3	q26.31	NLGN1-AS1	NR_046664	173628288	173638586	0.230342	0.230242	DIPLOID	3q	del	tel	n	1	n	0.95	169832115	179784455	0.171036	0.266912	0.465557	0	inf	0	16	7.44891	52
3	q26.31	NAALADL2	NM_207015	174577110	175523428	0.221201	0.212085	DIPLOID	3q	del	tel	n	1	n	0.95	169832115	179784455	0.171036	0.266912	0.465557	0	inf	0	16	7.44891	52
3	q26.31	NAALADL2-AS3	NR_046390	174797101	174833032	0.219082	0.218736	DIPLOID	3q	del	tel	n	1	n	0.95	169832115	179784455	0.171036	0.266912	0.465557	0	inf	0	16	7.44891	52
3	q26.31	NAALADL2-AS2	NR_046713	174952881	174988885	0.217581	0.217234	DIPLOID	3q	del	tel	n	1	n	0.95	169832115	179784455	0.171036	0.266912	0.465557	0	inf	0	16	7.44891	52
3	q26.31	MIR4789	NR_039952	175087328	175087410	0.216286	0.216285	DIPLOID	3q	del	tel	n	1	n	0.95	169832115	179784455	0.171036	0.266912	0.465557	0	inf	0	16	7.44891	52
3	q26.31	NAALADL2-AS1	NR_046714	175491365	175494121	0.212394	0.212367	DIPLOID	3q	del	tel	n	1	n	0.95	169832115	179784455	0.171036	0.266912	0.465557	0	inf	0	16	7.44891	52
3	q26.32	MIR7977	NR_107017	176232890	176232939	0.20525	0.20525	DIPLOID	3q	del	tel	n	1	n	0.95	169832115	179784455	0.171036	0.266912	0.465557	0	inf	0	16	7.44891	52
[truncated: 15,540 more rows]

## Sheet: Table S4e
Table S4e
[truncated: 18,650 more rows]

## Sheet: Table S4f
Table S4f
[truncated: 36 more rows]

[truncated: 1 more sheets: Table S4g]
