# Supplementary material for: Selective and mechanistic pressures shaping cancer aneuploidies
Source: Research Square preprint supplement (doi:10.21203/rs.3.rs-550953/v1), 2021-05-26
Supplement: Supplementary file 8 [file f4114175e997fdcb5c0053cb.xlsx]

## Sheet: Table S5a
Table S5a
All BrISCUT peaks sorted from highest to lowest effect size (column "rel_selection", in bold). Effect size greater than 1 denotes positive selection, and smaller than 1 denotes negative selection.
Chr	Cytoband	Peak.Start	Peak.End	Peak.Start.1	Peak.End.1	type	arm	direction	telcent	negpos	iter	code	conf	ks_stat	log10_ksby	combined_sig	rel_selection
12	q12	40647876	41361372	0.977242	0.984838	LGG	12q	del	tel	p	1	p	0.95	0.538812	3.71823	2.00343	47.056
3	p21.2	51315296	52734077	0.556257	0.57233	KIPAN	3p	del	tel	p	1	p	0.95	0.475186	16	7.60298	40.4977
8	p21.1	28354306	28977608	0.655469	0.670199	BRCALUM	8p	del	tel	p	1	p	0.95	0.52696	16	8.43136	40.3783
3	p21.2	51315296	52743824	0.556257	0.57244	KIRC	3p	del	tel	p	1	p	0.95	0.474606	16	7.5937	39.1258
17	p11.2	17473434	18824701	0.811402	0.877908	READ	17p	del	tel	p	1	p	0.95	0.696089	3.19791	2.22603	34.409
12	q12	40647876	41361372	0.977242	0.984838	GBMLGG	12q	del	tel	p	1	p	0.95	0.38405	2.31079	0.88746	26.5444
3	q26.1	166393576	169334014	0.271711	0.300038	CESC	3q	amp	tel	p	1	p	0.95	0.376072	8.31811	3.12821	26.3239
10	p12.2	24632343	29323844	0.626595	0.747983	GBM	10p	amp	tel	p	1	p	0.95	0.667402	2.1141	1.41096	21.7973
3	q26.2	167804824	172035365	0.245687	0.286442	LUSC	3q	amp	tel	p	1	p	0.95	0.3474	11.6316	4.04083	18.754
8	p12	30380584	31112628	0.703354	0.720654	LUSC	8p	del	tel	p	1	p	0.95	0.472934	16	7.56694	17.6712
3	p12.3	78106430	78867201	0.859759	0.868378	LUSC	3p	del	tel	p	1	p	0.95	0.597478	16	9.55965	17.5999
20	q13.13	47659901	49554652	0.391192	0.449716	BRCALUM	20q	amp	tel	p	1	p	0.95	0.472251	4.73003	2.23376	16.5679
17	p11.2	17437833	18045604	0.80965	0.839563	COADREAD	17p	del	tel	p	1	p	0.95	0.582131	16	9.3141	15.2278
17	p12	14132778	16837930	0.646985	0.780125	COAD	17p	del	tel	p	1	p	0.95	0.573749	13.332	7.64923	14.9952
8	p12	31952044	32998985	0.74049	0.765232	READ	8p	del	tel	p	1	p	0.95	0.528419	16	8.45471	13.6459
8	p21.2	26334260	30791599	0.607732	0.713067	LIHC	8p	del	tel	p	1	p	0.95	0.510937	16	8.17499	13.1699
5	q13.3	74810486	77015423	0.793524	0.810454	LUSC	5q	del	tel	p	1	p	0.95	0.527678	16	8.44286	12.7009
8	p12	31840726	32574845	0.73786	0.755208	LUAD	8p	del	tel	p	1	p	0.95	0.491853	16	7.86965	11.3527
18	q12.1	27536777	29595942	0.813312	0.84856	PAAD	18q	del	tel	p	1	p	0.95	0.52609	13.332	7.01384	11.2927
8	p21.3	22204212	31155025	0.510131	0.721655	UCS	8p	del	tel	p	1	p	0.95	0.501687	2.02463	1.01573	10.7747
3	q26.2	168917100	171073293	0.254955	0.275727	PANSCC	3q	amp	tel	p	2	p-lp	0.95	0.514555	16	8.23288	10.4417
10	p12.1	28224563	29499958	0.71954	0.752539	GBMLGG	10p	amp	tel	p	1	p	0.95	0.558312	11.9951	6.69698	10.2753
19	p13.3	3700859	3903004	0.143752	0.152257	OV	19p	del	tel	p	2	n-lp	0.95	0.304219	16	4.8675	10.2509
8	p12	28982998	30375892	0.670326	0.703243	BLCA	8p	del	tel	p	1	p	0.95	0.468366	16	7.49386	10.1708
8	p21.2	25297120	26316176	0.583222	0.607304	PRAD	8p	del	tel	p	1	p	0.95	0.418061	13.0396	5.45135	9.74836
4	q21.1	78447143	92373721	0.708411	0.810764	TGCT	4q	del	tel	p	1	p	0.95	0.566909	4.81988	2.73243	9.34035
18	q12.2	37070214	44012476	0.566536	0.685371	READ	18q	del	tel	p	1	p	0.95	0.515803	1.6315	0.841532	9.32025
6	q14.1	82747696	88463226	0.758638	0.811233	PAAD	6q	del	tel	p	1	p	0.95	0.50093	3.37021	1.68824	9.30248
14	q23.2	63867307	70469119	0.415491	0.492717	LGG	14	del	tel	p	1	p	0.95	0.306134	1.66956	0.511109	9.17022
14	q23.2	63867307	68878368	0.434099	0.492717	GBMLGG	14	del	tel	p	1	p	0.95	0.307536	2.85086	0.876743	9.03839
8	p21.2	25297120	29199556	0.583222	0.675444	BRCABAS	8p	del	tel	p	1	p	0.95	0.463221	4.48436	2.07725	8.56819
5	p15.33	1020354	1287540	0.00238668	0.00839569	PANCAN	5p	amp	tel	p	4	p-ln-ln-lp	0.95	0.623884	16	9.98214	8.55814
3	q26.1	162412427	179158366	0.177067	0.33839	KIRC	3q	amp	tel	p	1	p	0.95	0.391542	1.88512	0.738104	8.45861
9	p21.3	21121854	22190574	0.535646	0.563802	GBM	9p	del	tel	p	1	p	0.95	0.39361	9.84485	3.87503	8.39407
3	q26.2	168669945	170378408	0.26165	0.278108	OV	3q	amp	tel	p	1	p	0.95	0.30916	11.7195	3.62322	8.38912
1	p13.1	116036792	117617705	0.96172	0.975197	LUSC	1p	del	tel	p	1	p	0.95	0.28202	3.54942	1.00101	8.31848
4	p13	42050818	43324155	0.871998	0.899082	CESC	4p	del	tel	p	1	p	0.95	0.478922	3.83119	1.83484	8.0362
19	p13.3	3815535	4692354	0.148577	0.185466	UCEC	19p	del	tel	p	2	n-lp	0.95	0.36429	7.35102	2.6779	7.87742
9	p21.3	21125944	22190574	0.535754	0.563802	GBMLGG	9p	del	tel	p	1	p	0.95	0.359178	16	5.74684	7.82626
5	q11.2	56015975	63182542	0.899738	0.954766	UCEC	5q	del	tel	p	1	p	0.95	0.511461	1.77678	0.908751	7.71289
17	p11.2	16621758	17671402	0.769485	0.821146	BLCA	17p	del	tel	p	1	p	0.95	0.479932	8.86674	4.25544	7.60949
8	p12	29402040	31107532	0.680229	0.720533	PANSCC	8p	del	tel	p	1	p	0.95	0.418154	16	6.69046	7.54105
17	p12	15722853	16301185	0.725244	0.753708	BRCALUM	17p	del	tel	p	1	p	0.95	0.457551	8.72688	3.99299	7.50234
8	q24.13	126504534	132597922	0.129225	0.191548	LUAD	8q	amp	tel	p	2	p-lp	0.95	0.352051	2.14699	0.75585	7.41475
17	p13.2	5969683	7889455	0.245222	0.339707	PRAD	17p	del	tel	p	1	p	0.95	0.307098	2.04342	0.627532	7.41276
5	q13.2	70749744	85771234	0.726293	0.841634	LUAD	5q	del	tel	p	1	p	0.95	0.50934	10.6985	5.44918	7.3474
8	p21.1	27775528	28267173	0.641792	0.65341	WGD	8p	del	tel	p	1	p	0.95	0.432327	16	6.91722	7.17995
5	q23.2	122361704	124723524	0.427202	0.445337	KIPAN	5q	amp	tel	p	1	p	0.95	0.339531	13.332	4.52664	7.09494
8	q22.1	97293129	104296097	0.418694	0.49032	LIHC	8q	amp	tel	p	1	p	0.95	0.440346	10.7821	4.74788	7.09401
5	q12.1	59187580	61520132	0.912503	0.930413	BLCA	5q	del	tel	p	1	p	0.95	0.423087	7.16309	3.03061	7.06758
6	p21.31	36087881	43892190	0.624172	0.763058	UVM	6p	amp	tel	p	1	p	0.95	0.618513	3.653	2.25943	7.05082
18	q21.2	51477720	55088954	0.376934	0.438749	COAD	18q	del	tel	p	1	p	0.95	0.348057	2.62458	0.913504	6.87731
20	p12.1	12614084	15179820	0.472312	0.571983	READ	20p	del	tel	p	1	p	0.95	0.404238	2.4879	1.00571	6.8368
5	q12.3	65207877	68736516	0.857092	0.884187	ESCASTADCIN	5q	del	tel	p	1	p	0.95	0.458107	5.34635	2.4492	6.73079
11	q22.3	107122142	121574857	0.160859	0.345844	SKCM	11q	del	tel	p	1	p	0.95	0.267932	4.38223	1.17414	6.63254
9	p21.3	20146343	22864694	0.509946	0.581561	SKCM	9p	del	tel	p	1	p	0.95	0.385932	5.27496	2.03578	6.59229
6	q21	105885199	107652836	0.582051	0.598317	SKCM	6q	del	tel	p	1	p	0.95	0.374277	16	5.98843	6.58558
9	p21.3	20748703	22272137	0.525815	0.56595	ESCASTADCIN	9p	del	tel	p	1	p	0.95	0.340016	4.87599	1.65792	6.54851
3	q25.2	154716698	156578397	0.394592	0.412527	HNSC	3q	amp	tel	p	1	p	0.95	0.379064	13.332	5.05368	6.53568
7	p12.3	48809570	57233096	0.840534	0.98772	READ	7p	amp	tel	p	1	p	0.95	0.69826	2.46759	1.72302	6.53448
8	p21.1	28746324	29180515	0.664733	0.674994	BRCA	8p	del	tel	p	1	p	0.95	0.485592	16	7.76948	6.52244
5	q12.3	65207877	70661207	0.842314	0.884187	ESCASTAD	5q	del	tel	p	1	p	0.95	0.456102	7.80569	3.56019	6.52155
7	p12.2	49892547	57233096	0.859457	0.98772	COADREAD	7p	amp	tel	p	1	p	0.95	0.482019	3.90051	1.88012	6.4451
8	q23.2	111595048	132597922	0.129225	0.344041	LGG	8q	amp	tel	p	1	p	0.95	0.346819	2.77663	0.962989	6.39904
10	p12.1	27441218	31564701	0.699272	0.805963	LGG	10p	amp	tel	p	1	p	0.95	0.534932	8.22942	4.40218	6.33914
3	p12.3	75199046	76211681	0.826823	0.838295	HNSC	3p	del	tel	p	1	p	0.95	0.549044	16	8.78471	6.3142
18	q21.2	48569013	51296298	0.441855	0.488539	COADREAD	18q	del	tel	p	1	p	0.95	0.348759	4.16265	1.45176	6.09309
1	p31.1	80596275	114961233	0.659607	0.952551	PCPG	1p	del	tel	p	1	p	0.95	0.59881	1.66678	0.998084	5.91358
20	p12.1	14348026	15179820	0.53967	0.571983	COADREAD	20p	del	tel	p	1	p	0.95	0.358784	7.19828	2.58262	5.88482
1	p36.11	26603712	27797219	0.199347	0.209521	OV	1p	del	tel	p	2	n-lp	0.95	0.453844	16	7.2615	5.8121
5	q12.1	59552321	63182542	0.899738	0.927612	BRCA	5q	del	tel	p	1	p	0.95	0.397164	5.19183	2.06201	5.77769
8	p12	32540036	32998249	0.754386	0.765214	COADREAD	8p	del	tel	p	1	p	0.95	0.501928	16	8.03085	5.71354
3	q25.31	156867804	174551337	0.221449	0.391804	ESCA	3q	amp	tel	p	1	p	0.95	0.362584	1.98533	0.719848	5.66799
17	p11.2	18098195	18858057	0.842151	0.879549	CESC	17p	del	tel	p	1	p	0.95	0.429231	2.87828	1.23545	5.66496
6	q14.1	80419034	83118291	0.807823	0.832662	BRCALUM	6q	del	tel	p	1	p	0.95	0.404558	5.71881	2.31359	5.59831
9	p21.3	20603743	22272137	0.521996	0.56595	STAD	9p	del	tel	p	1	p	0.95	0.321471	3.51778	1.13086	5.58071
8	q21.3	87566214	97891460	0.484201	0.589806	BRCALUM	8q	amp	tel	p	1	p	0.95	0.445506	5.11073	2.27686	5.56823
3	p14.1	64049503	84491611	0.700516	0.932093	CESC	3p	del	tel	p	1	p	0.95	0.521515	3.58948	1.87197	5.55207
17	p13.1	7145281	7583743	0.303081	0.324661	SARC	17p	del	tel	p	2	n-lp	0.95	0.495533	7.96112	3.945	5.49122
7	p12.2	50243488	52742745	0.865589	0.909259	HNSC	7p	amp	tel	p	1	p	0.95	0.359681	3.6225	1.30295	5.47348
2	q33.3	206746704	209731843	0.222546	0.242835	HNSC	2q	del	tel	p	2	n-lp	0.95	0.316512	6.09865	1.9303	5.45417
5	q12.3	66129876	72604788	0.82739	0.877107	COADREAD	5q	del	tel	p	1	p	0.95	0.412073	1.62147	0.668162	5.40289
6	q13	73117042	76900291	0.865042	0.899857	LGG	6q	del	tel	p	1	p	0.95	0.271533	1.31791	0.357856	5.36908
8	q13.2	68709690	78843246	0.679024	0.782669	PRAD	8q	amp	tel	p	1	p	0.95	0.515932	5.57873	2.87825	5.35843
9	p21.3	21121854	22272137	0.535646	0.56595	ESCASTAD	9p	del	tel	p	1	p	0.95	0.301812	4.68114	1.41283	5.28158
8	p21.2	24028570	25431910	0.553244	0.586407	BRCA	8p	del	tel	p	2	p-lp	0.95	0.408004	2.43416	0.993146	5.25501
5	q11.2	52707105	65207877	0.884187	0.980172	BRCABAS	5q	del	tel	p	1	p	0.95	0.615536	2.13237	1.31255	5.20752
9	p21.3	20870618	22380211	0.529027	0.568798	LGG	9p	del	tel	p	1	p	0.95	0.318088	4.19972	1.33588	5.18786
8	q24.13	124945089	132597922	0.129225	0.207498	OV	8q	amp	tel	p	1	p	0.95	0.233406	6.69316	1.56222	5.11713
8	p12	29032672	30059318	0.6715	0.695762	ESCASTADCIN	8p	del	tel	p	1	p	0.95	0.367936	7.88935	2.90278	5.10502
8	p21.2	24572189	28230036	0.566091	0.652532	COAD	8p	del	tel	p	2	p-lp	0.95	0.467471	3.39239	1.58584	5.0904
13	q14.11	42551567	44962945	0.73296	0.7582	BRCA	13	del	tel	p	1	p	0.95	0.364699	6.64205	2.42235	5.07271
7	p14.1	41037581	44142845	0.704733	0.758992	GBMLGG	7p	amp	tel	p	1	p	0.95	0.444417	4.13451	1.83745	5.0165
8	q23.1	106843060	110623764	0.353975	0.392644	STAD	8q	amp	tel	p	1	p	0.95	0.346199	4.82835	1.67157	4.93862
1	p13.2	114135133	116856942	0.945509	0.968711	PANSCC	1p	del	tel	p	2	n-rp	0.95	0.353657	6.31828	2.23451	4.90169
5	q12.1	59928947	70661207	0.842314	0.92472	OV	5q	del	tel	p	1	p	0.95	0.42294	12.2984	5.20147	4.89204
11	q22.3	108048881	115236882	0.241981	0.333983	BRCALUM	11q	del	tel	p	2	p-lp	0.95	0.542494	4.02069	2.1812	4.88055
7	p14.1	37668400	44142845	0.645863	0.758992	GBM	7p	amp	tel	p	1	p	0.95	0.469884	3.62007	1.70101	4.8304
1	p36.13	18849811	22292266	0.133248	0.162594	UCEC	1p	del	tel	p	2	n-lp	0.95	0.427611	4.40805	1.88493	4.74941
17	p12	11651949	13042365	0.524886	0.593318	LIHC	17p	del	tel	p	1	p	0.95	0.391372	9.70637	3.7988	4.74595
5	q11.2	58145165	72146990	0.830905	0.938417	ESCA	5q	del	tel	p	1	p	0.95	0.48444	1.96005	0.949527	4.72737
5	q11.2	56100293	70749744	0.841634	0.954118	STAD	5q	del	tel	p	1	p	0.95	0.448769	4.25828	1.91098	4.708
17	q24.2	65482041	69469124	0.205725	0.277375	LUSC	17q	amp	tel	p	1	p	0.95	0.272277	2.77663	0.756013	4.65073
8	p12	29076737	30059318	0.672542	0.695762	ESCASTAD	8p	del	tel	p	1	p	0.95	0.343233	7.84688	2.69331	4.60462
17	q22	54483559	58979186	0.394236	0.475025	SKCM	17q	amp	tel	p	1	p	0.95	0.351839	5.34099	1.87917	4.57708
16	q22.3	72854577	74538726	0.346173	0.385456	PRAD	16q	del	tel	p	1	p	0.95	0.183423	1.50956	0.276888	4.57154
10	p11.1	38502717	38751526	0.985477	0.991915	WGD	10p	amp	tel	p	2	p-rp	0.95	0.352917	5.60715	1.97886	4.55335
9	p21.3	21121854	22512508	0.535646	0.572283	PANSCC	9p	del	tel	p	1	p	0.95	0.279571	9.08887	2.54098	4.54081
7	q22.1	102024186	111354928	0.493637	0.591574	LGG	7q	amp	tel	p	1	p	0.95	0.469738	7.49637	3.52133	4.53671
8	p21.2	24786568	28230036	0.571157	0.652532	COADREAD	8p	del	tel	p	2	p-lp	0.95	0.416277	2.47033	1.02834	4.44447
3	q26.1	162479615	178491260	0.183494	0.337743	KIPAN	3q	amp	tel	p	1	p	0.95	0.340217	1.82101	0.61954	4.43225
11	q12.2	60819420	72121529	0.793831	0.938491	ESCA	11q	amp	tel	p	1	p	0.95	0.617958	2.16109	1.33546	4.42411
14	q13.1	35214409	41049097	0.759638	0.827891	LUAD	14	amp	tel	p	1	p	0.95	0.424484	1.54588	0.656201	4.40433
8	q21.3	87566214	94932839	0.514461	0.589806	BRCA	8q	amp	tel	p	1	p	0.95	0.395858	16	6.33372	4.39887
2	q34	214806074	215409169	0.18396	0.188059	PANSCC	2q	del	tel	p	2	n-lp	0.95	0.315485	16	5.04776	4.36479
3	q26.2	169384296	170516109	0.260323	0.271226	PANCAN	3q	amp	tel	p	1	p	0.95	0.248217	16	3.97148	4.3428
11	q22.3	105580767	120400418	0.175891	0.365573	CESC	11q	del	tel	p	1	p	0.95	0.238865	2.4153	0.576931	4.25479
2	q33.3	206173501	215181487	0.185508	0.246731	CESC	2q	del	tel	p	2	n-lp	0.95	0.493359	12.4605	6.14749	4.25207
9	p21.3	21125944	23625105	0.535754	0.601594	DIPLOID	9p	del	tel	p	1	p	0.95	0.301241	16	4.81986	4.24887
2	q34	213573985	218424573	0.163466	0.196433	LUSC	2q	del	tel	p	2	n-lp	0.95	0.288037	5.5767	1.6063	4.24428
9	p21.3	21125944	22003260	0.535754	0.558867	PANCAN	9p	del	tel	p	1	p	0.95	0.267985	16	4.28776	4.24246
10	p11.1	38914683	38968238	0.996137	0.997522	PANCAN	10p	amp	tel	p	3	p-rp-rp	0.95	0.262991	1.44786	0.380775	4.23606
11	q13.4	71700565	74078394	0.768784	0.799219	HNSC	11q	del	tel	p	3	p-rn-lp	0.95	0.253677	3.79329	0.962271	4.23568
4	q21.22	83994582	88687692	0.735502	0.769993	LIHC	4q	del	tel	p	1	p	0.95	0.337611	4.0588	1.3703	4.21721
7	p14.1	37668400	42191039	0.645863	0.724887	SARC	7p	amp	tel	p	1	p	0.95	0.422175	1.78067	0.751755	4.2028
8	p21.2	23383636	30262786	0.538003	0.70057	HNSC	8p	del	tel	p	1	p	0.95	0.32102	6.94447	2.22931	4.16385
3	q26.2	169384296	171691725	0.248998	0.271226	WGD	3q	amp	tel	p	1	p	0.95	0.24773	16	3.96369	4.15134
5	p15.1	16760970	19471648	0.356393	0.417356	HNSC	5p	amp	tel	p	1	p	0.95	0.346776	2.58676	0.897027	4.14067
3	p13	71432139	79525026	0.78415	0.87583	BLCA	3p	del	tel	p	1	p	0.95	0.424054	2.08176	0.882778	4.13414
18	q21.2	48450640	55216689	0.374747	0.490566	STAD	18q	del	tel	p	2	p-lp	0.95	0.373562	5.37663	2.00851	4.11512
9	p21.3	21121854	27230152	0.535646	0.69657	LUSC	9p	del	tel	p	1	p	0.95	0.373877	7.53507	2.81719	4.07747
17	p12	11866891	13369870	0.535465	0.609437	LUSC	17p	del	tel	p	1	p	0.95	0.337515	3.2543	1.09837	4.06019
11	q13.4	71700565	73939434	0.770563	0.799219	PANSCC	11q	del	tel	p	3	p-rn-lp	0.95	0.134437	2.8509	0.383267	4.05983
13	q13.3	39069380	53251039	0.646207	0.794649	PRAD	13	del	tel	p	1	p	0.95	0.364572	1.92749	0.70271	4.05505
3	p21.31	45004750	63966610	0.484769	0.699577	LUAD	3p	del	tel	p	1	p	0.95	0.358951	7.41699	2.66233	4.01873
3	q26.2	168606041	176529286	0.202395	0.278724	UCEC	3q	amp	tel	p	1	p	0.95	0.265028	2.06544	0.547398	4.00866
18	q21.2	48511620	52780977	0.416441	0.489522	ESCASTADCIN	18q	del	tel	p	2	p-lp	0.95	0.416691	5.34285	2.22631	4.00712
6	p22.3	18751348	22527696	0.31565	0.382854	SKCM	6p	amp	tel	p	2	p-lp	0.95	0.365744	4.3266	1.58243	4.00544
12	q13.11	47800713	57038397	0.810355	0.908693	BRCABAS	12q	del	tel	p	1	p	0.95	0.422146	1.64623	0.694947	3.9826
8	p12	29846492	33615617	0.690732	0.779804	CESC	8p	del	tel	p	1	p	0.95	0.360269	3.94917	1.42277	3.96107
8	p21.2	26230632	36154393	0.605283	0.8398	UCEC	8p	del	tel	p	1	p	0.95	0.427978	10.3891	4.44632	3.91677
19	q13.33	48400360	48983346	0.322964	0.341992	OV	19q	del	tel	p	1	p	0.95	0.203791	5.33323	1.08686	3.90084
7	q22.1	102024186	110346981	0.504216	0.591574	GBMLGG	7q	amp	tel	p	1	p	0.95	0.407369	7.69511	3.13475	3.88778
6	q14.3	85437089	87716536	0.765509	0.786485	LUAD	6q	del	tel	p	1	p	0.95	0.397027	16	6.35244	3.81042
2	p25.1	9283099	14895525	0.099258	0.16257	BRCA	2p	del	tel	p	2	n-lp	0.95	0.303557	1.47491	0.44772	3.80876
8	p21.2	25455330	26863433	0.586961	0.620237	OV	8p	del	tel	p	1	p	0.95	0.400991	16	6.41586	3.80035
11	q12.2	60699356	72121529	0.793831	0.940028	ESCASTADCIN	11q	amp	tel	p	1	p	0.95	0.546802	4.11425	2.24968	3.79854
5	q31.2	137818744	145020305	0.271356	0.326652	KIRC	5q	amp	tel	p	2	p-lp	0.95	0.424784	1.95089	0.828709	3.78758
8	q23.1	106843060	109329694	0.367211	0.392644	ESCASTAD	8q	amp	tel	p	1	p	0.95	0.306591	5.99646	1.83846	3.7831
3	q26.2	167904844	169565570	0.26948	0.285479	DIPLOID	3q	amp	tel	p	1	p	0.95	0.250617	16	4.00988	3.75839
4	q22.2	93505135	102893888	0.631094	0.700096	OV	4q	del	tel	p	1	p	0.95	0.254395	9.8456	2.50467	3.71681
7	p11.2	56704382	57233096	0.978481	0.98772	WGD	7p	amp	tel	p	2	p-rp	0.95	0.29115	4.0408	1.17648	3.70638
8	p21.2	26942659	30059318	0.622109	0.695762	STAD	8p	del	tel	p	1	p	0.95	0.321322	2.54471	0.817671	3.70466
8	q23.3	112508800	118505562	0.273361	0.334695	HNSC	8q	amp	tel	p	1	p	0.95	0.305034	4.2208	1.28749	3.6978
8	p12	28801124	31869291	0.666028	0.738535	ESCA	8p	del	tel	p	1	p	0.95	0.380607	3.93114	1.49622	3.6853
7	p12.1	50807974	54261280	0.875452	0.935793	ESCASTADCIN	7p	amp	tel	p	1	p	0.95	0.271847	1.5368	0.417776	3.67816
10	p12.1	28835938	32563922	0.735359	0.831817	ESCASTADCIN	10p	amp	tel	p	1	p	0.95	0.383041	1.62708	0.623237	3.63113
8	q24.21	128606666	132597922	0.129225	0.170048	DIPLOID	8q	amp	tel	p	2	p-lp	0.95	0.304957	9.49738	2.89629	3.62374
8	q24.13	124979472	132597922	0.129225	0.207146	LUSC	8q	amp	tel	p	1	p	0.95	0.20402	1.66996	0.340706	3.61502
9	p21.3	21125944	22003260	0.535754	0.558867	WGD	9p	del	tel	p	1	p	0.95	0.242891	16	3.88625	3.60629
10	p12.1	28835938	32563922	0.735359	0.831817	ESCASTAD	10p	amp	tel	p	1	p	0.95	0.377479	1.74965	0.660455	3.60443
5	q12.3	65575131	66790950	0.872031	0.881367	PANSCC	5q	del	tel	p	1	p	0.95	0.419143	16	6.70629	3.59359
5	q23.2	122361704	124723524	0.427202	0.445337	KIRC	5q	amp	tel	p	1	p	0.95	0.353581	16	5.65729	3.58828
1	p36.11	26216081	27689910	0.196042	0.208606	PANSCC	1p	del	tel	p	2	n-lp	0.95	0.35256	8.53502	3.00911	3.57513
6	q13	73373578	75912410	0.874133	0.897496	GBMLGG	6q	del	tel	p	1	p	0.95	0.280363	5.59216	1.56784	3.5591
8	q24.21	128606666	130425528	0.151445	0.170048	PANCAN	8q	amp	tel	p	2	p-lp	0.95	0.289731	16	4.6357	3.54295
17	q24.2	65482041	68432595	0.224352	0.277375	PANSCC	17q	amp	tel	p	1	p	0.95	0.236182	4.78222	1.12947	3.53148
6	q13	73373578	76663783	0.867219	0.897496	GBM	6q	del	tel	p	1	p	0.95	0.292027	2.73309	0.798138	3.51926
17	q23.2	59492086	63453471	0.31383	0.385018	LUAD	17q	amp	tel	p	1	p	0.95	0.298668	4.04272	1.20743	3.50784
17	p12	15695418	16563481	0.723894	0.766617	BRCA	17p	del	tel	p	1	p	0.95	0.386607	16	6.18571	3.48209
11	q23.1	112400635	114709254	0.248734	0.278283	BRCA	11q	del	tel	p	2	p-lp	0.95	0.375685	3.7697	1.41622	3.47892
5	q12.3	63182936	66979904	0.87058	0.899735	WGD	5q	del	tel	p	1	p	0.95	0.410036	16	6.56057	3.47842
4	p15.1	28410654	30595557	0.581874	0.628346	BRCA	4p	del	tel	p	1	p	0.95	0.289749	4.10509	1.18945	3.47217
17	p13.1	7253001	7583290	0.308383	0.324639	DIPLOID	17p	del	tel	p	2	p-lp	0.95	0.333066	16	5.32906	3.45757
19	p13.3	1448228	1933960	0.0489803	0.0694158	BRCA	19p	del	tel	p	2	n-lp	0.95	0.173545	1.41869	0.246206	3.44196
5	q11.2	51889891	62586849	0.904312	0.986447	HNSC	5q	del	tel	p	1	p	0.95	0.332624	3.1092	1.03419	3.43277
3	p12.1	83644799	83893432	0.9225	0.925317	PANSCC	3p	del	tel	p	2	p-rp	0.95	0.238644	7.42488	1.77191	3.43149
5	q12.3	65575131	66927830	0.87098	0.881367	PANCAN	5q	del	tel	p	1	p	0.95	0.31201	16	4.99216	3.43115
16	p13.3	4125795	5861006	0.111304	0.166925	BLCA	16p	del	tel	p	2	n-lp	0.95	0.459547	4.70138	2.1605	3.41516
7	p22.1	4671546	6191895	0.0693032	0.0958685	OV	7p	del	tel	p	2	n-lp	0.95	0.205982	1.75822	0.362161	3.33601
8	p12	32505127	34348002	0.753561	0.797112	COAD	8p	del	tel	p	1	p	0.95	0.491393	16	7.86229	3.30121
8	p21.3	22204212	22933759	0.510131	0.527371	DIPLOID	8p	del	tel	p	2	p-lp	0.95	0.296808	11.195	3.32276	3.30075
8	p21.1	27775528	29188572	0.641792	0.675184	DIPLOID	8p	del	tel	p	1	p	0.95	0.398183	16	6.37092	3.28652
1	q31.3	195161567	219861287	0.285421	0.537628	BRCALUM	1q	amp	tel	p	1	p	0.95	0.432497	1.66353	0.719473	3.22564
17	p11.2	18764077	18860535	0.874924	0.879671	PANCAN	17p	del	tel	p	4	p-rp-rn-lp	0.95	0.0903058	1.69747	0.153292	3.22486
11	q22.3	107682996	108596176	0.326978	0.338666	DIPLOID	11q	del	tel	p	1	p	0.95	0.174035	16	2.78455	3.22349
8	q22.1	97913960	110059050	0.359751	0.48397	ESCASTADCIN	8q	amp	tel	p	1	p	0.95	0.337027	5.73964	1.93442	3.21732
7	p12.1	50629433	54261280	0.872333	0.935793	ESCASTAD	7p	amp	tel	p	1	p	0.95	0.23543	1.30614	0.307504	3.21245
17	p12	11270216	12566674	0.506098	0.569906	PANSCC	17p	del	tel	p	1	p	0.95	0.264591	5.89311	1.55927	3.20762
7	p12.1	50853428	52815289	0.876247	0.910527	PANSCC	7p	amp	tel	p	1	p	0.95	0.21498	3.04819	0.6553	3.20121
7	q21.11	77538221	90618020	0.711295	0.848583	LUSC	7q	amp	tel	p	1	p	0.95	0.342444	1.51545	0.518956	3.18797
3	p14.1	65741880	81650776	0.719688	0.899911	BRCA	3p	del	tel	p	1	p	0.95	0.334728	6.09865	2.04139	3.16905
13	q31.3	93499013	100459693	0.152065	0.224924	LIHC	13	amp	tel	p	2	n-lp	0.95	0.288223	1.42245	0.409982	3.15352
3	p13	72533768	85021208	0.79663	0.938093	ESCA	3p	del	tel	p	1	p	0.95	0.403971	1.9876	0.802931	3.14802
1	p36.11	26902694	27312816	0.201895	0.205391	PANCAN	1p	del	tel	p	2	n-lp	0.95	0.253905	16	4.06247	3.13784
11	q12.2	60699356	71726211	0.798891	0.940028	ESCASTAD	11q	amp	tel	p	1	p	0.95	0.432863	3.09914	1.3415	3.12026
1	p36.12	23841546	27690297	0.1758	0.208609	HNSC	1p	del	tel	p	2	n-lp	0.95	0.380075	2.44147	0.927943	3.10659
3	p21.2	51577321	52734077	0.559226	0.57233	DIPLOID	3p	del	tel	p	1	p	0.95	0.292295	16	4.67673	3.09662
19	q13.32	46546848	48983346	0.322964	0.40249	LUAD	19q	del	tel	p	2	n-lp	0.95	0.424207	6.76437	2.86949	3.09559
13	q14.13	46835398	53251039	0.646207	0.71336	GBMLGG	13	del	tel	p	1	p	0.95	0.294808	1.31126	0.38657	3.08091
7	q31.33	125975677	133889428	0.257111	0.340175	HNSC	7q	del	tel	p	2	n-lp	0.95	0.377093	8.48566	3.19988	3.07356
1	p21.3	99413369	102944572	0.820013	0.850115	BRCA	1p	del	tel	p	2	n-rp	0.95	0.273876	5.65377	1.54843	3.07308
17	p12	13475437	15722853	0.614633	0.725244	LUAD	17p	del	tel	p	1	p	0.95	0.273268	4.45172	1.21651	3.05333
17	q24.2	64888919	68813477	0.217508	0.288034	BRCA	17q	amp	tel	p	1	p	0.95	0.233298	6.16722	1.4388	3.04628
5	p14.1	28034230	30161958	0.609929	0.657781	LUAD	5p	amp	tel	p	1	p	0.95	0.307921	2.12855	0.655425	3.0288
18	q21.2	48450640	52530017	0.420737	0.490566	ESCASTAD	18q	del	tel	p	2	p-lp	0.95	0.352174	4.6706	1.64486	3.02185
5	q11.2	53785436	54271617	0.96816	0.971893	PANSCC	5q	del	tel	p	2	p-rp	0.95	0.310761	6.2132	1.93082	3.0093
17	p13.1	7253001	7583290	0.308383	0.324639	PANCAN	17p	del	tel	p	2	p-lp	0.95	0.308226	16	4.93162	3.0004
11	q22.3	107283038	108983907	0.322015	0.343785	PANCAN	11q	del	tel	p	1	p	0.95	0.152903	16	2.44645	2.97815
13	q12.11	20110194	50189312	0.678254	0.993098	COAD	13	amp	tel	p	1	p	0.95	0.51526	1.42707	0.735315	2.97732
6	q12	68295582	82747696	0.811233	0.944225	LIHC	6q	del	tel	p	1	p	0.95	0.314549	6.19302	1.94801	2.97203
1	p36.11	25136287	27755669	0.186838	0.209166	LUSC	1p	del	tel	p	3	p-ln-lp	0.95	0.386215	3.03846	1.1735	2.96052
3	p12.1	83478492	86219051	0.920616	0.951663	HNSC	3p	del	tel	p	2	p-rp	0.95	0.304148	3.51363	1.06866	2.95471
1	p36.11	26769355	27312816	0.200759	0.205391	DIPLOID	1p	del	tel	p	2	n-lp	0.95	0.256974	16	4.11158	2.95427
8	p21.1	27775528	28090343	0.641792	0.649231	PANCAN	8p	del	tel	p	1	p	0.95	0.412662	16	6.60259	2.95011
16	q22.1	70704454	74472459	0.347718	0.435607	OV	16q	del	tel	p	2	p-lp	0.95	0.406696	2.15397	0.876012	2.93181
8	p21.1	27702522	37924264	0.640066	0.881625	KIPAN	8p	del	tel	p	1	p	0.95	0.441989	3.61789	1.59907	2.92956
1	p36.11	25698469	31959438	0.19163	0.245002	COADREAD	1p	del	tel	p	2	n-lp	0.95	0.39787	4.44557	1.76876	2.92713
6	q11.1	62850876	81998014	0.818132	0.994328	CHOL	6q	del	tel	p	1	p	0.95	0.583853	2.53624	1.48079	2.92631
8	q23.3	114779214	117325043	0.285435	0.311474	PANSCC	8q	amp	tel	p	1	p	0.95	0.223503	7.76549	1.73561	2.92508
8	p21.2	23641181	34509722	0.544089	0.800933	SKCM	8p	del	tel	p	1	p	0.95	0.345767	1.84505	0.637956	2.90317
19	q13.32	47446561	48104221	0.351658	0.373124	PANCAN	19q	del	tel	p	2	n-lp	0.95	0.227225	16	3.63559	2.88286
9	p21.3	21125944	31343975	0.535754	0.804949	LIHC	9p	del	tel	p	1	p	0.95	0.504259	2.44884	1.23485	2.88154
15	q26.1	90361163	93162837	0.111533	0.147361	ESCASTAD	15	amp	tel	p	2	n-lp	0.95	0.24052	1.97499	0.475025	2.8686
5	q11.2	57020864	61520132	0.912503	0.94705	DIPLOID	5q	del	tel	p	1	p	0.95	0.195257	6.7969	1.32714	2.82401
9	p22.1	19337944	32668703	0.488649	0.839849	BRCALUM	9p	del	tel	p	1	p	0.95	0.398485	2.24662	0.895247	2.8238
19	p13.2	11548539	14292655	0.473917	0.589367	LUAD	19p	del	tel	p	1	p	0.95	0.268052	3.26058	0.874006	2.81573
3	p14.3	54438330	59635356	0.591636	0.650511	ESCASTADCIN	3p	del	tel	p	1	p	0.95	0.261175	2.58282	0.67457	2.7991
3	q25.32	157289935	170770137	0.257876	0.387738	ESCASTADCIN	3q	amp	tel	p	1	p	0.95	0.2853	2.58504	0.737512	2.78717
13	q14.11	42555160	44001544	0.743023	0.758162	DIPLOID	13	del	tel	p	1	p	0.95	0.176984	4.5804	0.810657	2.78627
10	q23.2	88455268	110561434	0.267278	0.506841	BLCA	10q	del	tel	p	1	p	0.95	0.250163	1.67212	0.418304	2.774
8	q24.21	128291577	130425528	0.151445	0.17327	WGD	8q	amp	tel	p	2	p-lp	0.95	0.295735	6.00603	1.7762	2.76648
3	q21.1	122944358	143538847	0.520209	0.718607	PRAD	3q	amp	tel	p	1	p	0.95	0.43611	1.71783	0.749164	2.76336
1	p36.11	26258544	27689910	0.196404	0.208606	WGD	1p	del	tel	p	2	n-lp	0.95	0.265411	16	4.24658	2.74276
18	q12.1	29930164	30465615	0.798426	0.807591	ESCASTAD	18q	del	tel	p	1	p	0.95	0.334497	16	5.35195	2.73751
3	p14.3	55137510	59702821	0.599557	0.651275	ESCASTAD	3p	del	tel	p	1	p	0.95	0.25278	3.25501	0.822803	2.73177
1	p36.11	26960556	31901187	0.202389	0.244505	BRCA	1p	del	tel	p	2	n-lp	0.95	0.375492	13.332	5.00607	2.71391
8	p21.3	21428969	25450823	0.49181	0.586854	OV	8p	del	tel	p	2	p-lp	0.95	0.316746	1.44566	0.457906	2.71266
6	q15	91026876	106664579	0.591145	0.735046	KIRC	6q	del	tel	p	1	p	0.95	0.324145	2.37965	0.771352	2.70627
18	q12.3	39259147	51475929	0.43878	0.647902	LUAD	18q	del	tel	p	1	p	0.95	0.304774	5.17611	1.57754	2.70106
1	p13.3	110485495	111421427	0.914398	0.922376	PANCAN	1p	del	tel	p	2	n-rp	0.95	0.242503	16	3.88004	2.68972
13	q14.11	42555160	43790912	0.745228	0.758162	PANCAN	13	del	tel	p	1	p	0.95	0.164656	9.15983	1.50822	2.68869
3	p14.3	53934793	74951093	0.585932	0.824014	PANSCC	3p	del	tel	p	2	p-lp	0.95	0.388395	4.76322	1.85001	2.68787
17	q21.31	41338647	50319724	0.549851	0.711246	SARC	17q	amp	tel	p	1	p	0.95	0.407138	2.41825	0.984562	2.66076
4	q22.2	93508341	95206517	0.687592	0.700073	PANCAN	4q	del	tel	p	1	p	0.95	0.0882379	6.3112	0.556887	2.66043
1	q24.2	170438724	182074768	0.671256	0.790071	BRCA	1q	amp	tel	p	1	p	0.95	0.302254	4.54544	1.37388	2.65153
14	q23.3	66607554	77177814	0.337014	0.460662	BRCA	14	del	tel	p	1	p	0.95	0.184418	1.34486	0.248017	2.64073
1	p21.1	106238621	111671707	0.878195	0.92451	DIPLOID	1p	del	tel	p	3	n-rp-lp	0.95	0.175174	2.55231	0.447097	2.63965
1	p36.11	24795949	29079671	0.183936	0.220453	KIPAN	1p	del	tel	p	2	n-lp	0.95	0.350231	2.29566	0.804009	2.62391
17	p11.2	16109675	16563481	0.744282	0.766617	WGD	17p	del	tel	p	1	p	0.95	0.281321	16	4.50114	2.62098
18	q11.2	24184977	25816230	0.878012	0.905935	ESCASTADCIN	18q	del	tel	p	2	p-rp	0.95	0.184857	1.37076	0.253396	2.61077
7	p11.2	56423816	57233096	0.973579	0.98772	PANCAN	7p	amp	tel	p	2	p-rp	0.95	0.234157	5.40892	1.26654	2.5998
3	q25.32	157289935	169947587	0.2658	0.387738	ESCASTAD	3q	amp	tel	p	1	p	0.95	0.255748	3.61828	0.925368	2.59335
18	q12.1	31617048	41273364	0.613423	0.778716	BLCA	18q	del	tel	p	1	p	0.95	0.268511	2.9391	0.78918	2.58296
18	q21.1	47400115	48993406	0.481275	0.508548	PANSCC	18q	del	tel	p	1	p	0.95	0.219857	12.4114	2.72872	2.56851
3	q27.3	187438192	188164924	0.0903024	0.0973034	GBMLGG	3q	del	tel	p	2	n-lp	0.95	0.347483	1.67757	0.582925	2.55237
7	q21.13	90618020	96859114	0.645787	0.711295	PANSCC	7q	amp	tel	p	1	p	0.95	0.272045	2.09405	0.569677	2.53324
8	q11.21	50618863	74534820	0.72309	0.967701	COADREAD	8q	amp	tel	p	1	p	0.95	0.302367	2.13237	0.644759	2.52485
3	p14.3	56079214	56536253	0.610225	0.615403	PANCAN	3p	del	tel	p	1	p	0.95	0.266944	16	4.2711	2.51869
10	q21.3	66852706	95239975	0.433316	0.740946	GBM	10q	del	tel	p	1	p	0.95	0.280974	1.34456	0.377787	2.51576
2	p16.2	53731906	57450236	0.600674	0.64262	LUSC	2p	amp	tel	p	1	p	0.95	0.270143	2.14845	0.580387	2.51162
4	p14	38559113	47398060	0.79773	0.985733	LUSC	4p	del	tel	p	1	p	0.95	0.401729	6.65366	2.67297	2.51051
18	q21.2	48383015	52286145	0.424911	0.491723	HNSC	18q	del	tel	p	2	p-lp	0.95	0.286903	2.89124	0.829506	2.49926
9	p22.1	19337944	23297360	0.488649	0.59296	BRCA	9p	del	tel	p	1	p	0.95	0.234392	2.01597	0.472527	2.48314
6	q14.1	80419034	88720738	0.756268	0.832662	BRCA	6q	del	tel	p	1	p	0.95	0.211848	5.80846	1.23051	2.46954
4	p14	34991566	38753177	0.721849	0.801857	OV	4p	del	tel	p	1	p	0.95	0.249931	1.94806	0.486882	2.4686
6	q12	68167111	90307632	0.741665	0.945407	BLCA	6q	del	tel	p	1	p	0.95	0.252492	2.35621	0.594924	2.46683
4	p14	39964070	42895715	0.827613	0.889969	PANSCC	4p	del	tel	p	1	p	0.95	0.300262	11.9381	3.58456	2.46493
17	q25.3	77272835	77876183	0.0546455	0.0654881	DIPLOID	17q	amp	tel	p	2	p-lp	0.95	0.208646	1.97887	0.412882	2.43739
5	q11.2	56182483	56463157	0.951332	0.953487	WGD	5q	del	tel	p	2	p-rp	0.95	0.254407	11.2521	2.86262	2.43648
5	p13.3	30681307	33717880	0.669461	0.737754	OV	5p	amp	tel	p	1	p	0.95	0.262997	4.30488	1.13217	2.43563
20	p12.1	12614084	20748435	0.472312	0.788306	COAD	20p	del	tel	p	1	p	0.95	0.332669	3.02431	1.0061	2.43205
6	p22.3	21502768	24204423	0.364614	0.412693	OV	6p	amp	tel	p	1	p	0.95	0.23594	3.59718	0.848718	2.43015
2	q34	213469492	218103135	0.165651	0.197143	BLCA	2q	del	tel	p	2	n-lp	0.95	0.332905	5.8888	1.96041	2.42749
16	q23.2	79300987	79939048	0.22021	0.235092	DIPLOID	16q	del	tel	p	1	p	0.95	0.118433	3.55883	0.421484	2.42084
6	q15	91026876	105840255	0.59873	0.735046	KIPAN	6q	del	tel	p	1	p	0.95	0.286081	2.23824	0.640317	2.39593
19	q13.32	47446561	47921059	0.357636	0.373124	DIPLOID	19q	del	tel	p	2	n-lp	0.95	0.237506	12.2334	2.9055	2.39404
3	p14.3	56537003	57021793	0.615411	0.620903	WGD	3p	del	tel	p	1	p	0.95	0.264223	16	4.22757	2.38462
18	q11.2	23218832	27997171	0.840679	0.922473	STAD	18q	del	tel	p	1	p	0.95	0.364021	10.185	3.70755	2.38236
1	p13.3	110485495	111421427	0.914398	0.922376	WGD	1p	del	tel	p	2	n-rp	0.95	0.241297	12.5793	3.03534	2.36772
18	q21.1	47940246	49186916	0.477962	0.499302	WGD	18q	del	tel	p	2	p-lp	0.95	0.193771	7.20468	1.39606	2.35889
3	p21.1	53743374	59702821	0.583764	0.651275	STAD	3p	del	tel	p	1	p	0.95	0.237006	1.42707	0.338225	2.34287
17	q21.1	38197304	50572132	0.545315	0.767698	BRCALUM	17q	amp	tel	p	1	p	0.95	0.369656	3.38955	1.25297	2.33877
11	q13.1	64592907	76573529	0.736848	0.890193	OV	11q	amp	tel	p	1	p	0.95	0.217567	2.0811	0.452778	2.33582
1	p36.13	16796721	27644604	0.115747	0.20822	BRCABAS	1p	del	tel	p	2	n-lp	0.95	0.447277	1.73566	0.776321	2.31845
11	p14.1	28387772	33957705	0.563147	0.675446	BLCA	11p	del	tel	p	1	p	0.95	0.230128	1.49311	0.343606	2.31115
3	p12.3	75363574	80236103	0.828687	0.883885	PANSCC	3p	del	tel	p	1	p	0.95	0.562366	16	8.99786	2.3069
20	q13.13	48452671	50459529	0.363243	0.425229	BRCA	20q	amp	tel	p	1	p	0.95	0.244424	4.40805	1.07743	2.29789
5	p15.2	12775705	21339189	0.266764	0.459357	PANSCC	5p	amp	tel	p	1	p	0.95	0.256559	4.88756	1.25395	2.28723
11	q13.3	68468754	73157555	0.78057	0.840584	DIPLOID	11q	amp	tel	p	1	p	0.95	0.159189	2.47033	0.393248	2.26727
19	p13.3	2934057	3187430	0.111492	0.122151	DIPLOID	19p	del	tel	p	2	n-lp	0.95	0.160398	7.60383	1.21964	2.26041
19	p13.3	1210606	1726233	0.0389831	0.0606764	WGD	19p	del	tel	p	3	n-lp-lp	0.95	0.227565	1.88322	0.428555	2.25688
4	p14	36840731	40566874	0.76118	0.840435	WGD	4p	del	tel	p	1	p	0.95	0.18856	8.07747	1.52309	2.25044
19	q13.32	47388305	48924962	0.324869	0.375025	WGD	19q	del	tel	p	2	n-lp	0.95	0.222652	12.5793	2.8008	2.24339
11	q14.3	89980181	96974219	0.475732	0.565251	BRCALUM	11q	del	tel	p	1	p	0.95	0.28432	4.39511	1.24961	2.24148
11	q23.2	113203022	117404768	0.214233	0.268013	PANSCC	11q	del	tel	p	2	p-lp	0.95	0.249839	1.42245	0.355383	2.23947
11	q22.3	107293621	109602013	0.314104	0.34365	ESCASTADCIN	11q	del	tel	p	2	n-lp	0.95	0.231149	2.07637	0.47995	2.2333
19	p13.3	3429937	3901888	0.132354	0.15221	WGD	19p	del	tel	p	2	n-lp	0.95	0.220049	16	3.52078	2.23021
18	q21.2	48595048	48980675	0.481493	0.488094	PANCAN	18q	del	tel	p	1	p	0.95	0.194841	16	3.11746	2.22856
3	q26.1	167279035	172561853	0.240615	0.291507	BRCA	3q	amp	tel	p	1	p	0.95	0.183761	1.83708	0.337584	2.21794
18	q21.2	48595048	48993406	0.481275	0.488094	DIPLOID	18q	del	tel	p	1	p	0.95	0.177543	16	2.84069	2.21576
8	p12	33706219	34252379	0.781945	0.794852	WGD	8p	del	tel	p	3	p-rn-lp	0.95	0.0949685	3.8449	0.365144	2.21417
10	q23.33	96215840	98815335	0.39457	0.42274	DIPLOID	10q	del	tel	p	1	p	0.95	0.122412	3.31495	0.405792	2.20992
11	q22.3	103509476	106106310	0.358846	0.392084	BRCA	11q	del	tel	p	1	p	0.95	0.235917	12.6502	2.98439	2.20312
5	q11.2	55926493	56463157	0.951332	0.955453	PANCAN	5q	del	tel	p	2	p-rp	0.95	0.232994	16	3.7279	2.19258
6	q14.3	86592361	89107157	0.752712	0.775854	DIPLOID	6q	del	tel	p	1	p	0.95	0.207327	16	3.31724	2.19157
6	q12	68764546	71859782	0.911426	0.939909	PANSCC	6q	del	tel	p	2	p-rp	0.95	0.204497	2.23532	0.457115	2.18622
17	q23.2	59164084	62006996	0.339824	0.390913	WGD	17q	amp	tel	p	1	p	0.95	0.176311	11.0931	1.95583	2.17737
2	p16.1	57541471	88615224	0.643649	0.994184	HNSC	2p	amp	tel	p	1	p	0.95	0.434814	2.26385	0.984355	2.17684
2	q33.3	206792266	207433905	0.238164	0.242525	PANSCC	2q	del	tel	p	4	n-lp-rn-lp	0.95	0.18468	3.21142	0.593087	2.16326
12	p13.1	13018781	14121252	0.371696	0.405482	WGD	12p	del	tel	p	1	p	0.95	0.145775	2.08273	0.303609	2.14657
11	q13.4	70944477	71900963	0.796654	0.808896	PANCAN	11q	del	tel	p	4	p-rn-lp-rp	0.95	0.110464	2.53552	0.280085	2.14496
11	q22.3	103816273	115236882	0.241981	0.388158	HNSC	11q	del	tel	p	2	p-lp	0.95	0.483358	6.16068	2.97781	2.13961
11	q13.1	65721348	75605940	0.749233	0.875749	WGD	11q	amp	tel	p	1	p	0.95	0.171886	3.23199	0.555535	2.1362
7	p12.1	51114374	51747538	0.880806	0.89187	PANCAN	7p	amp	tel	p	1	p	0.95	0.182555	12.8699	2.34946	2.13431
5	q11.1	50263787	54307864	0.967881	0.998933	LUSC	5q	del	tel	p	2	p-rp	0.95	0.397503	6.43423	2.55763	2.13077
15	q26.1	89833558	93404322	0.108444	0.154108	ESCASTADCIN	15	amp	tel	p	2	n-lp	0.95	0.252536	1.72321	0.435171	2.1264
11	q22.3	107620402	109602013	0.314104	0.339467	WGD	11q	del	tel	p	1	p	0.95	0.135678	8.5739	1.16329	2.11757
14	q24.1	69215951	70793280	0.411699	0.43015	PANCAN	14	del	tel	p	1	p	0.95	0.0901665	3.31495	0.298898	2.10006
1	q23.1	158774243	162772984	0.868346	0.909177	PANCAN	1q	amp	tel	p	1	p	0.95	0.123416	5.01426	0.618838	2.09267
18	q11.2	21217775	36550096	0.694274	0.956726	ESCA	18q	del	tel	p	1	p	0.95	0.337338	4.49962	1.51789	2.08736
22	q13.2	41935911	44251325	0.159202	0.23177	OV	22	del	tel	p	2	n-lp	0.95	0.200052	2.71919	0.543981	2.0825
10	q23.31	89603159	90339696	0.48642	0.494401	PANCAN	10q	del	tel	p	1	p	0.95	0.111493	8.16494	0.910333	2.07982
4	q22.1	91131207	98883310	0.66057	0.717543	LUSC	4q	del	tel	p	1	p	0.95	0.183702	1.51837	0.278928	2.07634
10	p11.1	38271494	38756073	0.979495	0.992033	PANSCC	10p	del	tel	p	2	p-rp	0.95	0.29044	2.01969	0.586598	2.07456
18	q12.1	31714672	35388483	0.714158	0.777045	HNSC	18q	del	tel	p	1	p	0.95	0.289905	10.5674	3.06353	2.07048
6	q13	70437205	71568040	0.914111	0.924517	LUAD	6q	del	tel	p	2	p-rp	0.95	0.194598	1.37312	0.267207	2.06423
16	q23.2	79300987	79836243	0.222608	0.235092	PANCAN	16q	del	tel	p	1	p	0.95	0.0997818	5.37962	0.536788	2.06173
3	p12.2	81398530	81874809	0.897054	0.902449	WGD	3p	del	tel	p	2	p-rp	0.95	0.170498	8.22942	1.4031	2.06141
4	p14	37461793	40566874	0.77439	0.840435	PANCAN	4p	del	tel	p	1	p	0.95	0.157586	10.733	1.69136	2.05591
8	p21.3	22525980	24993723	0.517735	0.576052	PANCAN	8p	del	tel	p	2	p-lp	0.95	0.165469	4.45243	0.736741	2.04939
17	p11.2	16109675	16326331	0.744282	0.754945	PANCAN	17p	del	tel	p	2	p-rp	0.95	0.0907698	2.53821	0.230393	2.04286
4	q22.1	91024033	93504574	0.7001	0.718331	WGD	4q	del	tel	p	1	p	0.95	0.161654	13.0396	2.10791	2.04225
7	p11.2	54908629	57233927	0.947104	0.987734	DIPLOID	7p	amp	tel	p	2	p-rp	0.95	0.227917	2.11737	0.482583	2.01082
2	p22.1	40273557	46720510	0.448854	0.52158	PANSCC	2p	amp	tel	p	2	p-lp	0.95	0.252132	2.18765	0.551577	1.99821
6	p22.3	19790560	24204423	0.334144	0.412693	DIPLOID	6p	amp	tel	p	1	p	0.95	0.195873	7.80538	1.52887	1.99128
11	q13.3	70171623	75558645	0.749838	0.818788	PANCAN	11q	amp	tel	p	1	p	0.95	0.158331	6.91502	1.09486	1.98346
8	p21.1	27464519	42869992	0.634442	0.998502	KIRC	8p	del	tel	p	1	p	0.95	0.428597	2.86408	1.22753	1.98173
10	q23.1	87135503	93697595	0.45003	0.521143	PANSCC	10q	del	tel	p	1	p	0.95	0.211732	4.06655	0.861017	1.96669
19	p13.3	3695700	3815535	0.143535	0.148577	PANCAN	19p	del	tel	p	2	n-lp	0.95	0.195008	16	3.12012	1.95933
17	q21.33	48094610	49771127	0.55971	0.589838	OV	17q	amp	tel	p	2	n-lp	0.95	0.168015	2.2072	0.370843	1.94003
10	p11.22	31564701	32192912	0.805963	0.822217	DIPLOID	10p	amp	tel	p	1	p	0.95	0.14445	1.56956	0.226723	1.93957
11	p15.3	12395563	13813234	0.240718	0.269301	BRCA	11p	del	tel	p	2	n-lp	0.95	0.259007	2.75331	0.713127	1.9149
8	q22.3	102327841	102853837	0.433446	0.438826	DIPLOID	8q	amp	tel	p	1	p	0.95	0.288401	16	4.61441	1.90937
3	p12.2	80976279	81874809	0.89227	0.902449	PANCAN	3p	del	tel	p	2	p-rp	0.95	0.157329	16	2.51726	1.90075
7	q31.31	117859670	128751954	0.311035	0.425362	PANSCC	7q	del	tel	p	2	n-lp	0.95	0.297047	11.9951	3.5631	1.88924
7	p12.1	51114374	52827565	0.880806	0.910741	WGD	7p	amp	tel	p	1	p	0.95	0.193362	6.34271	1.22644	1.88747
11	q14.1	80570527	83080441	0.653564	0.685689	PANCAN	11q	amp	tel	p	3	p-ln-rp	0.95	0.180889	1.85208	0.335023	1.88674
11	q22.3	105553016	110378527	0.304165	0.365928	PANSCC	11q	del	tel	p	1	p	0.95	0.218175	16	3.4908	1.88129
7	p12.3	47539459	51747538	0.818341	0.89187	DIPLOID	7p	amp	tel	p	1	p	0.95	0.186419	5.6767	1.05825	1.87277
6	q13	70437205	71322508	0.91637	0.924517	WGD	6q	del	tel	p	2	p-rp	0.95	0.170752	7.20381	1.23006	1.87222
1	p36.23	7711426	7955089	0.0382991	0.0403762	PANCAN	1p	del	tel	p	3	n-lp-lp	0.95	0.122565	2.36245	0.289553	1.87134
12	q21.31	80712419	81268917	0.552413	0.558337	PANCAN	12q	del	tel	p	3	n-ln-rp	0.95	0.15529	5.94203	0.922738	1.86351
17	p13.1	6724556	14131833	0.282375	0.646939	BRCA	17p	del	tel	p	2	p-lp	0.95	0.321454	2.9441	0.946395	1.86213
14	q23.3	65351558	70793280	0.411699	0.475355	DIPLOID	14	del	tel	p	2	n-lp	0.95	0.225416	9.06952	2.04442	1.8522
15	q26.1	90712554	91759547	0.129478	0.142867	PANCAN	15	amp	tel	p	2	n-lp	0.95	0.136638	6.7869	0.927351	1.85069
17	p13.1	6724556	9933397	0.282375	0.440304	WGD	17p	del	tel	p	2	p-lp	0.95	0.275646	8.98913	2.47782	1.84964
10	q23.2	89167879	92340989	0.464732	0.499118	WGD	10q	del	tel	p	1	p	0.95	0.115688	4.24234	0.490787	1.84939
8	p12	34997591	35489569	0.812463	0.824089	PANSCC	8p	del	tel	p	3	p-rn-lp	0.95	0.14605	2.40642	0.351458	1.84873
17	q25.3	77273584	78415910	0.0449463	0.0654746	PANCAN	17q	amp	tel	p	3	p-lp-lp	0.95	0.201217	3.13326	0.630466	1.84691
16	q12.1	49950940	58801361	0.713248	0.919685	BRCA	16q	del	tel	p	1	p	0.95	0.221875	3.98478	0.884121	1.8445
2	q34	214389006	216387903	0.177308	0.190894	WGD	2q	del	tel	p	2	n-lp	0.95	0.0911462	1.49303	0.136084	1.82334
12	p13.2	12358957	14121252	0.351475	0.405482	PANCAN	12p	del	tel	p	1	p	0.95	0.132769	4.57886	0.607929	1.81933
16	q22.1	66916289	70253820	0.446119	0.523967	OV	16q	del	tel	p	1	p	0.95	0.310603	10.3147	3.20378	1.81714
1	q25.3	180549163	182858007	0.663259	0.686834	DIPLOID	1q	amp	tel	p	1	p	0.95	0.161016	3.94993	0.636003	1.80853
17	p12	13975529	15694785	0.639246	0.723863	DIPLOID	17p	del	tel	p	1	p	0.95	0.247545	16	3.96072	1.80408
4	q13.1	63933657	64734417	0.911545	0.91743	PANCAN	4q	del	tel	p	4	p-rn-rn-lp	0.95	0.133721	2.87095	0.383906	1.79627
9	p22.1	18672995	28985510	0.471131	0.742815	LUAD	9p	del	tel	p	1	p	0.95	0.292054	1.63414	0.477258	1.793
2	q33.3	207461282	220992753	0.146011	0.237978	KIRC	2q	del	tel	p	2	n-lp	0.95	0.390663	2.20739	0.862346	1.78843
17	q21.33	48420693	60984315	0.358202	0.583978	GBMLGG	17q	amp	tel	p	1	p	0.95	0.296652	1.47208	0.436695	1.78833
15	q14	35370076	44322876	0.736111	0.850602	WGD	15	del	tel	p	1	p	0.95	0.149356	1.83287	0.27375	1.77357
2	q37.1	232661067	236675081	0.0394264	0.0667077	LGG	2q	del	tel	p	2	n-lp	0.95	0.291431	1.41164	0.411396	1.7728
10	q22.1	72090110	100864518	0.372363	0.684189	LUSC	10q	del	tel	p	1	p	0.95	0.240568	2.29566	0.552261	1.77168
17	q24.2	65463761	67843699	0.234935	0.277704	DIPLOID	17q	amp	tel	p	1	p	0.95	0.176128	11.7195	2.06414	1.7666
5	p13.3	30681307	31714202	0.669461	0.692691	WGD	5p	amp	tel	p	1	p	0.95	0.152858	4.13507	0.632077	1.76298
7	q31.1	110423442	130347013	0.294293	0.503414	ESCA	7q	del	tel	p	2	n-lp	0.95	0.309267	1.8069	0.558816	1.75881
15	q25.1	79372352	94598291	0.0931756	0.287889	BRCA	15	amp	tel	p	2	n-lp	0.95	0.227981	1.92522	0.438913	1.75251
14	q23.1	62010566	81048405	0.291737	0.514437	LUAD	14	del	tel	p	2	n-lp	0.95	0.265791	2.08756	0.554853	1.74972
6	p22.3	20777093	24013681	0.3517	0.409299	PANCAN	6p	amp	tel	p	1	p	0.95	0.161619	11.9951	1.93863	1.74894
3	p12.3	79109468	81341960	0.871122	0.896413	DIPLOID	3p	del	tel	p	2	p-rp	0.95	0.129299	3.73821	0.483345	1.74007
7	q21.2	90924951	106762846	0.541836	0.708073	DIPLOID	7q	amp	tel	p	1	p	0.95	0.1831	5.88513	1.07757	1.73971
20	p12.1	14328401	18806046	0.538908	0.71285	WGD	20p	del	tel	p	1	p	0.95	0.150621	3.35434	0.505235	1.72439
19	p13.3	1448228	2203721	0.0489803	0.0807651	PANCAN	19p	del	tel	p	3	n-lp-lp	0.95	0.190044	3.25501	0.618596	1.72349
2	p16.3	48519922	61644062	0.310071	0.458121	DIPLOID	2p	amp	cent	p	1	p	0.95	0.230815	3.1623	0.729905	1.72125
10	p11.1	38150141	38751526	0.976355	0.991915	PANCAN	10p	amp	tel	p	2	p-rp	0.95	0.255533	6.00507	1.53449	1.7166
1	p13.1	117187397	117539373	0.971528	0.974529	WGD	1p	del	tel	p	3	n-rp-rp	0.95	0.222179	4.13873	0.91954	1.71294
18	q12.2	35949513	38758206	0.656477	0.704555	WGD	18q	del	tel	p	1	p	0.95	0.21372	16	3.41953	1.71177
4	p15.2	22573546	34136488	0.457719	0.703661	PANSCC	4p	del	tel	p	2	p-lp	0.95	0.214129	1.86679	0.399733	1.71022
6	q13	70437205	71322508	0.91637	0.924517	PANCAN	6q	del	tel	p	2	p-rp	0.95	0.144389	12.1281	1.75117	1.70671
2	q35	215562576	216246762	0.178268	0.182918	PANCAN	2q	del	tel	p	2	n-lp	0.95	0.115028	6.76611	0.778291	1.70344
22	q13.2	42003025	44538369	0.150206	0.229666	DIPLOID	22	del	tel	p	3	n-ln-lp	0.95	0.183178	2.43121	0.445344	1.70203
15	q26.1	90712554	91759547	0.129478	0.142867	DIPLOID	15	amp	tel	p	2	n-lp	0.95	0.107867	1.51418	0.163329	1.70102
11	q14.3	89414796	93235747	0.523582	0.572488	HNSC	11q	del	tel	p	1	p	0.95	0.27919	8.86674	2.47551	1.69967
2	p16.1	60739537	74125166	0.679726	0.830726	PANSCC	2p	amp	tel	p	1	p	0.95	0.299619	7.14997	2.14226	1.69511
19	q13.2	43080656	48468788	0.339759	0.515625	PANSCC	19q	del	tel	p	2	n-lp	0.95	0.273043	3.49898	0.955371	1.68629
20	q13.2	52127086	53297173	0.275596	0.311737	PANCAN	20q	amp	tel	p	1	p	0.95	0.126072	5.13474	0.647348	1.68389
10	p11.22	33612761	36839237	0.858954	0.942436	PANSCC	10p	del	tel	p	1	p	0.95	0.164025	1.37932	0.226243	1.68171
7	q21.2	90924951	94181479	0.673892	0.708073	PANCAN	7q	amp	tel	p	1	p	0.95	0.142442	7.04047	1.00286	1.6727
5	p13.3	28581733	31773999	0.622242	0.694036	PANCAN	5p	amp	tel	p	1	p	0.95	0.12095	5.55522	0.671904	1.66991
4	p14	37415305	44350712	0.773401	0.920916	DIPLOID	4p	del	tel	p	1	p	0.95	0.127052	1.78005	0.226159	1.66891
11	p15.4	8899668	13572708	0.170236	0.264452	GBMLGG	11p	del	tel	p	2	n-lp	0.95	0.274635	1.48226	0.407079	1.66062
16	q11.2	46795160	61139381	0.658714	0.993294	BRCALUM	16q	del	tel	p	1	p	0.95	0.298258	2.1049	0.627803	1.65926
7	q11.21	64510663	101342956	0.0146778	0.401276	STAD	7q	amp	cent	p	1	p	0.95	0.315023	3.07015	0.967168	1.65349
3	q24	146336607	150855211	0.449727	0.493257	PANSCC	3q	amp	tel	p	1	p	0.95	0.35392	16	5.66272	1.65316
13	q12.3	31896691	52311480	0.656041	0.869727	WGD	13	del	tel	p	1	p	0.95	0.16331	3.32354	0.542767	1.65198
2	q33.3	207461282	221905184	0.13981	0.237978	KIPAN	2q	del	tel	p	2	n-lp	0.95	0.316187	1.57953	0.499427	1.6509
16	q23.1	74472858	87469139	0.0445695	0.347709	TGCT	16q	del	tel	p	2	n-lp	0.95	0.415308	1.41442	0.587421	1.63725
20	q13.13	48437998	49700603	0.386684	0.425682	WGD	20q	amp	tel	p	1	p	0.95	0.153484	3.323	0.510026	1.63077
1	p13.2	114441209	118096426	0.948119	0.979277	DIPLOID	1p	del	tel	p	2	n-rp	0.95	0.264746	11.3256	2.99839	1.62993
8	p12	33854650	34252379	0.785453	0.794852	PANCAN	8p	del	tel	p	3	p-rn-lp	0.95	0.0756544	4.6704	0.353337	1.62868
10	p11.22	33948383	35506679	0.867638	0.907958	WGD	10p	amp	tel	p	1	p	0.95	0.141157	2.44091	0.344551	1.62315
2	p16.1	60739537	69571124	0.679726	0.779353	DIPLOID	2p	amp	tel	p	1	p	0.95	0.15287	2.1682	0.331452	1.62301
22	q13.2	42982860	43773876	0.174166	0.198957	PANCAN	22	del	tel	p	3	n-ln-lp	0.95	0.13494	3.68557	0.497329	1.62152
9	p22.2	17412099	31389171	0.437912	0.806139	BLCA	9p	del	tel	p	1	p	0.95	0.369725	1.61607	0.597504	1.61894
11	q14.1	84795483	85183645	0.626644	0.631612	PANCAN	11q	del	tel	p	3	p-rn-lp	0.95	0.0667467	1.34456	0.0897453	1.61722
1	p13.1	116308035	117617705	0.964032	0.975197	PANCAN	1p	del	tel	p	3	n-rp-rp	0.95	0.211459	7.65465	1.61865	1.61242
20	p12.1	13814538	15555358	0.518946	0.586571	PANCAN	20p	del	tel	p	1	p	0.95	0.116962	3.85325	0.450685	1.60165
2	p16.3	52596977	57464172	0.587871	0.642777	WGD	2p	amp	tel	p	1	p	0.95	0.142739	3.2281	0.460775	1.59821
8	p12	30937325	31813810	0.716511	0.737224	PANCAN	8p	del	tel	p	4	p-rn-lp-lp	0.95	0.120871	2.94367	0.355805	1.59729
2	q31.1	172498162	189090190	0.524395	0.637162	PANCAN	2q	amp	cent	p	1	p	0.95	0.138961	10.9681	1.52414	1.59656
19	q11	28493000	37754420	0.0082417	0.31053	PANCAN	19q	amp	cent	p	1	p	0.95	0.205739	16	3.29183	1.59277
2	p16.1	55682348	57539294	0.622677	0.643624	PANCAN	2p	amp	tel	p	1	p	0.95	0.133345	5.58554	0.744805	1.59033
17	q21.33	48466595	49129123	0.571247	0.583153	PANCAN	17q	amp	tel	p	3	p-rn-lp	0.95	0.140199	6.31828	0.885813	1.58791
8	q21.13	80044272	108536617	0.375323	0.66674	LUAD	8q	amp	tel	p	1	p	0.95	0.293814	4.12395	1.21168	1.58421
18	q21.2	49318146	59776305	0.296698	0.475716	OV	18q	del	tel	p	1	p	0.95	0.156621	2.24169	0.351095	1.58126
17	q21.32	46989153	49565546	0.563404	0.609703	DIPLOID	17q	amp	tel	p	3	p-rn-lp	0.95	0.165058	6.50678	1.074	1.56459
19	p13.2	8565169	11451971	0.530146	0.651598	PANCAN	19p	amp	cent	p	2	p-rp	0.95	0.172508	11.6712	2.01338	1.5623
6	q14.1	80420870	86721386	0.774666	0.832645	WGD	6q	del	tel	p	1	p	0.95	0.177904	16	2.84647	1.5568
15	q26.1	89898913	94009515	0.100705	0.153273	WGD	15	amp	tel	p	2	n-lp	0.95	0.120274	1.83382	0.220561	1.54943
11	q13.4	70732967	91440372	0.546562	0.811604	ESCASTAD	11q	del	tel	p	2	n-lp	0.95	0.229919	2.47288	0.568562	1.52609
13	q32.2	99212505	99762818	0.159359	0.165119	PANCAN	13	amp	tel	p	2	n-lp	0.95	0.0934032	2.35376	0.219848	1.52096
10	p11.22	31622082	33426239	0.807447	0.854128	PANCAN	10p	amp	tel	p	1	p	0.95	0.135814	5.15048	0.699505	1.5151
1	q21.3	154945047	162885216	0.0517236	0.1328	WGD	1q	amp	cent	p	1	p	0.95	0.144333	4.44464	0.641511	1.50677
1	p36.11	24739061	56129365	0.548962	0.816549	DIPLOID	1p	amp	cent	p	1	p	0.95	0.169436	7.58365	1.28494	1.50593
6	q16.1	95836631	103297766	0.622127	0.690786	PANSCC	6q	del	tel	p	1	p	0.95	0.184366	3.42612	0.631659	1.50495
17	q23.1	57992761	61932912	0.341155	0.411962	PANCAN	17q	amp	tel	p	1	p	0.95	0.1732	16	2.7712	1.5011
7	q21.3	95821461	112379605	0.343321	0.517118	DIPLOID	7q	amp	cent	p	1	p	0.95	0.217536	7.85866	1.70954	1.49171
8	q21.3	88803115	121828918	0.23937	0.577155	GBMLGG	8q	amp	tel	p	1	p	0.95	0.282611	2.08568	0.589438	1.47281
15	q14	35805405	48551454	0.154965	0.317965	WGD	15	del	cent	p	1	p	0.95	0.160111	8.03868	1.28708	1.47261
7	q22.3	105353347	113102424	0.475295	0.55663	ESCASTAD	7q	del	tel	p	2	n-lp	0.95	0.211474	2.00973	0.425006	1.47173
18	q12.1	29930164	39025414	0.651903	0.807591	ESCASTADCIN	18q	del	tel	p	1	p	0.95	0.348491	12.5164	4.36186	1.46715
19	q13.2	41884803	47662715	0.366069	0.554657	GBMLGG	19q	del	tel	p	2	n-lp	0.95	0.26484	3.62478	0.959987	1.45565
6	q12	68297006	71568040	0.914111	0.944212	DIPLOID	6q	del	tel	p	2	p-rp	0.95	0.124026	3.55348	0.440726	1.45151
8	q13.3	70961223	71897674	0.750063	0.759641	DIPLOID	8q	amp	tel	p	2	p-rp	0.95	0.0900388	1.413	0.127225	1.44689
2	p22.2	38546917	66911894	0.250646	0.570624	PANCAN	2p	amp	cent	p	1	p	0.95	0.222531	13.332	2.96678	1.44655
12	p12.1	23116164	27989184	0.681135	0.830471	PANCAN	12p	amp	tel	p	2	n-rp	0.95	0.149506	2.11908	0.316815	1.44599
7	q31.31	118500397	121270535	0.389561	0.418637	PANCAN	7q	del	tel	p	4	n-lp-ln-rp	0.95	0.182098	5.29272	0.963794	1.44554
8	q22.3	102319239	103298753	0.428895	0.438914	PANCAN	8q	amp	tel	p	1	p	0.95	0.248112	16	3.96979	1.44532
8	q13.3	70961223	71804445	0.751017	0.759641	PANCAN	8q	amp	tel	p	2	p-rp	0.95	0.0900967	3.65152	0.32899	1.44395
8	q13.2	68962860	71804445	0.751017	0.78008	WGD	8q	amp	tel	p	2	p-rp	0.95	0.0979987	1.67882	0.164522	1.44187
12	p12.1	25962449	33399832	0.00371653	0.231639	WGD	12p	amp	cent	p	1	p	0.95	0.191299	5.28758	1.01151	1.43505
6	p22.3	18791791	24669228	0.31637	0.420965	WGD	6p	amp	tel	p	1	p	0.95	0.13274	2.95566	0.392336	1.42183
3	p23	31013358	59701429	0.348741	0.673732	PANCAN	3p	del	cent	p	1	p	0.95	0.237521	16	3.80033	1.42166
6	q16.3	100923527	103148957	0.623496	0.643975	PANCAN	6q	del	tel	p	2	p-lp	0.95	0.0734069	1.73566	0.127409	1.41362
16	q11.2	46631585	61013009	0.00289047	0.338339	PANCAN	16q	del	cent	p	1	p	0.95	0.148972	2.51113	0.374088	1.40731
2	q31.1	172498162	189090190	0.524395	0.637162	WGD	2q	amp	cent	p	1	p	0.95	0.107864	3.65289	0.394015	1.39943
5	q11.1	50355315	110401941	0.00176956	0.462831	PANCAN	5q	del	cent	p	1	p	0.95	0.183843	12.3302	2.26682	1.39701
8	q23.3	113632854	117415284	0.284512	0.323199	WGD	8q	amp	tel	p	1	p	0.95	0.213955	16	3.42327	1.36843
18	q11.2	24184977	28017918	0.840324	0.905935	PANCAN	18q	del	tel	p	2	p-rp	0.95	0.0665993	1.92349	0.128103	1.36419
6	q14.1	82494351	88728693	0.756195	0.813565	PANCAN	6q	del	tel	p	1	p	0.95	0.184438	16	2.95101	1.36035
11	p11.2	46628164	48374491	0.930903	0.966112	PANCAN	11p	del	tel	p	2	n-rp	0.95	0.0959493	2.51846	0.241645	1.35888
19	p13.2	11753832	19945779	0.172797	0.517446	PANCAN	19p	amp	cent	p	1	p	0.95	0.25052	16	4.00832	1.35657
15	q14	35805405	56928547	0.154965	0.425093	PANCAN	15	del	cent	p	1	p	0.95	0.163984	16	2.62375	1.35396
19	p13.3	6190970	7954070	0.248515	0.322692	PANSCC	19p	del	tel	p	2	n-lp	0.95	0.185801	3.45145	0.641282	1.35028
1	q21.3	151089055	159244974	0.0123502	0.0956299	PANCAN	1q	amp	cent	p	2	p-lp	0.95	0.161869	4.75025	0.768916	1.34638
11	p15.4	8659807	9280171	0.1654	0.177907	PANCAN	11p	del	tel	p	2	n-lp	0.95	0.0992746	2.75539	0.27354	1.33387
7	q22.3	105353347	129967667	0.298274	0.55663	ESCASTADCIN	7q	del	tel	p	2	n-lp	0.95	0.256375	2.9766	0.763127	1.32761
6	p21.1	43115619	51536923	0.100896	0.250762	WGD	6p	amp	cent	p	1	p	0.95	0.153275	4.61595	0.707511	1.29814
17	q24.3	70490887	73376680	0.135504	0.187364	PANCAN	17q	amp	tel	p	2	p-lp	0.95	0.144437	3.94993	0.570518	1.2972
16	p13.2	9782135	22785203	0.290577	0.707385	WGD	16p	amp	cent	p	1	p	0.95	0.157152	2.82036	0.443224	1.27316
6	p22.2	26616415	47385998	0.174766	0.544383	DIPLOID	6p	amp	cent	p	1	p	0.95	0.201908	3.80946	0.76916	1.24574
6	p22.2	26274498	45940957	0.449532	0.799518	SKCM	6p	amp	tel	p	1	p	0.95	0.339767	6.32584	2.14931	1.2456
11	p14.3	23348271	36962490	0.263973	0.538457	PANCAN	11p	amp	cent	p	1	p	0.95	0.129543	4.38223	0.567688	1.19671
11	q12.1	59039527	76553731	0.0387275	0.262899	DIPLOID	11q	amp	cent	p	1	p	0.95	0.202558	4.67847	0.947664	1.19542
10	q24.32	104507155	107147106	0.304279	0.332888	PANCAN	10q	del	tel	p	2	p-lp	0.95	0.108498	1.55741	0.168976	1.1834
6	p21.31	35484752	47385998	0.174766	0.386561	PANCAN	6p	amp	cent	p	1	p	0.95	0.165911	9.62915	1.59758	1.17893
22	q11.21	18613737	31596896	0.0372898	0.444195	WGD	22	amp	cent	p	1	p	0.95	0.202549	7.39768	1.49839	1.16702
1	q24.1	166627412	183524293	0.171012	0.343545	PANCAN	1q	amp	cent	p	1	p	0.95	0.173825	16	2.7812	1.16589
7	q21.13	88141179	124071291	0.262708	0.639836	WGD	7q	amp	cent	p	1	p	0.95	0.158062	8.56661	1.35405	1.16136
7	q22.3	105204480	112331795	0.483383	0.558193	PANCAN	7q	del	tel	p	2	n-lp	0.95	0.104296	2.96396	0.30913	1.15323
13	q12.3	29447351	75525094	0.104636	0.58694	WGD	13	del	cent	p	1	p	0.95	0.133866	5.14112	0.688224	1.15262
12	q14.1	60857478	70808335	0.2303	0.336231	PANCAN	12q	amp	cent	p	1	p	0.95	0.116481	6.04921	0.704617	1.14754
22	q11.21	18613737	31596896	0.0372898	0.444195	PANCAN	22	amp	cent	p	1	p	0.95	0.18248	10.5456	1.92436	1.13844
13	q12.3	29636796	75370756	0.106619	0.585325	PANCAN	13	del	cent	p	1	p	0.95	0.132276	10.4875	1.38724	1.13189
12	p12.3	18089290	29023246	0.137839	0.472916	PANCAN	12p	amp	cent	p	1	p	0.95	0.190404	8.7735	1.67051	1.12819
7	p12.1	50833111	57198660	0.0128821	0.124108	DIPLOID	7p	amp	cent	p	1	p	0.95	0.156374	1.65998	0.259577	1.12026
11	q13.2	67181011	76115699	0.142934	0.257292	PANCAN	11q	amp	cent	p	1	p	0.95	0.144169	7.85898	1.13302	1.1164
13	q13.2	34856295	75525094	0.161252	0.58694	PANSCC	13	del	cent	p	1	p	0.95	0.141549	2.41835	0.342317	1.103
14	q12	32579389	72604504	0.141285	0.609488	PANCAN	14	del	cent	p	1	p	0.95	0.100105	1.88184	0.188382	1.04287
14	q21.1	40072663	80594245	0.22894	0.70295	WGD	14	del	cent	p	1	p	0.95	0.131542	1.74821	0.229963	1.04184
21	q21.1	16443414	24146380	0.0338928	0.272145	PANCAN	21	amp	cent	p	1	p	0.95	0.127987	2.58469	0.330808	1.03125
20	p12.1	13700579	23576821	0.101821	0.485481	WGD	20p	amp	cent	p	1	p	0.95	0.100791	1.47208	0.148373	1.0088
12	q12	43741540	83527711	0.0480954	0.471633	DIPLOID	12q	amp	cent	p	1	p	0.95	0.223387	6.60998	1.47658	1.00038
17	p12	13807528	15694785	0.630977	0.723863	PANCAN	17p	del	tel	p	1	p	0.95	0.245383	16	3.92613	0.959052
17	q21.2	39313305	57918370	0.252357	0.586701	DIPLOID	17q	del	cent	n	1	n	0.95	0.135458	4.40871	0.597193	0.945543
11	q13.1	64592908	89414797	0.109807	0.427512	WGD	11q	amp	cent	n	1	n	0.95	0.110717	1.92775	0.213434	0.902826
8	p11.21	40591969	41540387	0.944668	0.967081	WGD	8p	del	tel	n	2	p-rn	0.95	0.120986	8.47778	1.02569	0.894311
17	q11.1	25332216	51655022	0.00110878	0.474145	OV	17q	del	cent	p	1	p	0.95	0.228552	10.6762	2.44006	0.878271
11	p14.2	25123866	33001531	0.497342	0.656168	DIPLOID	11p	del	tel	n	1	n	0.95	0.152602	8.06762	1.23114	0.86349
9	p21.1	28550575	36958016	0.731356	0.952851	LGG	9p	del	tel	n	2	p-rn	0.95	0.252093	1.38857	0.35005	0.843121
19	p13.3	390340	6320962	0.746016	0.995527	PANCAN	19p	amp	cent	n	3	p-rp-rn	0.95	0.186539	7.47329	1.39406	0.842322
11	p13	34098912	35504853	0.678293	0.706639	PANCAN	11p	del	tel	n	3	n-rp-ln	0.95	0.126758	4.38309	0.555591	0.840895
8	p11.21	40815373	41540387	0.949948	0.967081	PANCAN	8p	del	tel	n	2	p-rn	0.95	0.100786	11.4095	1.14992	0.814929
17	q21.1	38166879	49307326	0.231755	0.431955	PANCAN	17q	del	cent	n	1	n	0.95	0.143447	13.332	1.91243	0.803978
10	q22.3	77422505	82012098	0.576665	0.626402	WGD	10q	del	tel	n	2	p-rn	0.95	0.104244	1.57552	0.164238	0.801936
18	q11.2	19568145	24451444	0.901374	0.984964	PAAD	18q	del	tel	n	2	p-rn	0.95	0.2647	1.37247	0.363293	0.793819
18	q11.1	19082611	39604315	0.0067249	0.358007	WGD	18q	amp	cent	n	1	n	0.95	0.141833	4.95507	0.702792	0.792463
17	q12	35057020	49307326	0.175869	0.431955	WGD	17q	del	cent	n	1	n	0.95	0.166543	9.39696	1.565	0.785295
19	q13.42	55426779	56352137	0.0824503	0.112653	PANCAN	19q	del	tel	n	3	n-lp-ln	0.95	0.178725	4.44557	0.794533	0.78318
9	p21.1	28543418	35149993	0.731168	0.905218	STAD	9p	del	tel	n	2	p-rn	0.95	0.286046	1.74501	0.499153	0.77989
12	p12.1	25209870	26622098	0.745298	0.788576	PANCAN	12p	del	tel	n	2	p-rn	0.95	0.147172	4.20657	0.619091	0.779356
18	q11.1	19088391	33206151	0.00682384	0.248486	PANCAN	18q	amp	cent	n	1	n	0.95	0.12938	7.09843	0.918393	0.775901
16	q21	66194608	69707240	0.458868	0.5408	DIPLOID	16q	del	tel	n	2	p-rn	0.95	0.105769	1.92962	0.204094	0.772092
4	p16.3	2512054	9595918	0.031014	0.181687	PANCAN	4p	amp	tel	n	2	n-ln	0.95	0.14914	2.58386	0.385356	0.768383
9	q21.33	87600796	97268900	0.62475	0.763064	PANCAN	9q	del	tel	n	2	n-rn	0.95	0.173101	2.50117	0.432955	0.766931
16	q21	66524750	66812613	0.526385	0.533099	PANCAN	16q	del	tel	n	2	p-rn	0.95	0.0886568	2.98401	0.264553	0.766689
6	p22.2	26415999	52162773	0.0897582	0.547949	PANCAN	6p	del	cent	n	1	n	0.95	0.159121	4.69281	0.746724	0.755681
17	q12	35857150	48525696	0.582091	0.809752	SKCM	17q	amp	tel	n	2	p-rn	0.95	0.255523	1.41233	0.360882	0.75154
11	q12.1	58206120	64573761	0.890438	0.97194	DIPLOID	11q	amp	tel	n	2	p-rn	0.95	0.226471	1.39023	0.314848	0.750208
12	q15	69001046	84657443	0.516341	0.683008	WGD	12q	del	tel	n	1	n	0.95	0.160313	6.89392	1.10519	0.745095
8	p11.23	37211584	38250450	0.864783	0.889334	PANCAN	8p	del	tel	n	4	p-rn-lp-rn	0.95	0.107882	7.95479	0.85818	0.741206
11	p14.3	22607734	24326481	0.446612	0.481265	PANCAN	11p	del	tel	n	1	n	0.95	0.0993102	7.2267	0.717684	0.734574
5	p15.32	4407065	5130480	0.0785538	0.0948234	PANCAN	5p	amp	tel	n	2	p-ln	0.95	0.10293	1.53227	0.157717	0.728972
18	q21.1	43947215	47364068	0.509165	0.567653	WGD	18q	del	tel	n	3	p-lp-rn	0.95	0.171778	1.37721	0.236575	0.721687
7	q33	136532978	141904310	0.172985	0.229364	PANCAN	7q	del	tel	n	3	n-lp-ln	0.95	0.0937238	1.61328	0.151203	0.716811
9	p21.1	28543418	35046418	0.731168	0.90249	ESCASTADCIN	9p	del	tel	n	2	p-rn	0.95	0.298591	2.57931	0.770159	0.701555
19	q13.2	42775930	47388577	0.474429	0.624984	PANCAN	19q	amp	cent	n	2	p-rn	0.95	0.187779	16	3.00446	0.700944
6	q11.1	62346745	89163505	0.00103261	0.247806	PANCAN	6q	amp	cent	n	1	n	0.95	0.177364	16	2.83782	0.697607
16	p12.2	21352038	27302729	0.663483	0.85423	OV	16p	del	tel	n	2	n-rn	0.95	0.259539	1.96652	0.510387	0.69206
10	q11.21	43604950	56907782	0.00711965	0.151281	WGD	10q	amp	cent	n	1	n	0.95	0.127716	3.36749	0.430082	0.692014
22	q11.21	18358204	23816387	0.799654	0.970719	DIPLOID	22	del	tel	n	1	n	0.95	0.130686	3.9034	0.510121	0.688415
11	p13	34098912	35775926	0.678293	0.712104	DIPLOID	11p	del	tel	n	2	n-rn	0.95	0.158833	2.92504	0.464594	0.686738
12	p12.1	24026765	26622098	0.709041	0.788576	WGD	12p	del	tel	n	2	p-rn	0.95	0.203025	3.93114	0.798118	0.681452
19	q13.2	39622639	39955454	0.61763	0.628493	PANCAN	19q	del	tel	n	3	n-lp-rn	0.95	0.105835	2.08318	0.220474	0.679616
8	p11.23	38130119	38299419	0.88649	0.890491	WGD	8p	del	tel	n	4	p-rn-lp-rn	0.95	0.105012	3.54236	0.371991	0.677373
1	p35.2	32082000	34772705	0.246046	0.268983	PANCAN	1p	del	tel	n	3	n-lp-rn	0.95	0.117215	2.98269	0.349615	0.677321
8	p21.2	23557231	38533343	0.103981	0.457895	BRCALUM	8p	amp	cent	n	1	n	0.95	0.336502	6.44545	2.16891	0.674268
7	q21.13	89902164	109739123	0.510597	0.718809	LUSC	7q	del	tel	n	1	n	0.95	0.232746	1.56182	0.363508	0.673645
16	p13.3	6632888	12127769	0.191668	0.367804	STAD	16p	del	tel	n	1	n	0.95	0.349699	2.7608	0.965447	0.672186
12	p13.31	9158320	14357770	0.25339	0.41273	WGD	12p	amp	tel	n	1	n	0.95	0.126872	1.7148	0.217561	0.671722
9	q22.2	92340882	97786815	0.617341	0.695251	PANCAN	9q	amp	tel	n	2	n-rn	0.95	0.109268	1.38098	0.150897	0.671292
19	q13.32	47519083	50638497	0.268941	0.370757	PANCAN	19q	amp	tel	n	1	n	0.95	0.125485	4.33177	0.543571	0.668906
2	p16.1	58418326	60405491	0.653541	0.675957	PANCAN	2p	del	tel	n	2	n-rn	0.95	0.174372	2.95832	0.51585	0.666911
1	q24.2	170195230	184743664	0.644005	0.792558	PANCAN	1q	del	tel	n	2	n-rn	0.95	0.231352	4.38668	1.01487	0.666297
8	p21.3	23113718	42246931	0.0162219	0.468376	COAD	8p	amp	cent	n	1	n	0.95	0.380144	9.37813	3.56504	0.665186
6	q24.2	143214828	163913273	0.0643295	0.254801	DIPLOID	6q	amp	tel	n	1	n	0.95	0.266526	4.63915	1.23645	0.661507
1	p33	49766462	70475156	0.396798	0.573329	DIPLOID	1p	del	tel	n	4	n-rp-lp-ln	0.95	0.199356	2.13703	0.426029	0.660782
21	q22.11	34183883	35451192	0.378198	0.417396	PANCAN	21	del	tel	n	1	n	0.95	0.108438	2.86166	0.310312	0.658584
9	q33.3	127994563	131903880	0.129255	0.185182	PANCAN	9q	amp	tel	n	1	n	0.95	0.139651	5.91003	0.825339	0.657486
19	q13.12	35958676	36751714	0.722198	0.748082	PANCAN	19q	del	tel	n	1	n	0.95	0.165269	16	2.6443	0.655268
9	q32	116422275	130546049	0.14868	0.350738	DIPLOID	9q	amp	tel	n	1	n	0.95	0.143699	2.14153	0.307737	0.651283
6	q11.1	62409651	80602960	0.00161148	0.16903	WGD	6q	amp	cent	n	1	n	0.95	0.17987	13.332	2.39803	0.650811
19	q13.12	36197764	37084975	0.711321	0.740279	OV	19q	del	tel	n	2	p-rn	0.95	0.272389	9.21194	2.50923	0.64564
4	p15.1	32569457	42257240	0.123612	0.329669	PANCAN	4p	amp	cent	n	1	n	0.95	0.117045	1.81205	0.212091	0.642164
5	q23.2	124075270	136096117	0.339879	0.43218	WGD	5q	amp	tel	n	1	n	0.95	0.244447	12.8699	3.14601	0.642144
7	p22.2	3849481	22676860	0.0549391	0.383913	LGG	7p	del	tel	n	1	n	0.95	0.528903	2.00697	1.06149	0.638538
21	q21.3	30897807	34154807	0.418295	0.519034	PANCAN	21	amp	tel	n	1	n	0.95	0.112497	1.68514	0.189573	0.63819
1	p13.3	108872872	120331631	0.0016685	0.0993488	PANCAN	1p	amp	cent	n	1	n	0.95	0.155372	16	2.48596	0.638126
4	q31.3	151612960	182290595	0.0475733	0.273037	PANCAN	4q	amp	tel	n	1	n	0.95	0.219597	8.03655	1.7648	0.63291
9	q31.3	113185521	116570359	0.348619	0.397044	PANCAN	9q	del	tel	n	1	n	0.95	0.217966	16	3.48746	0.629856
18	q11.1	19082611	40587026	0.0067249	0.374828	STAD	18q	amp	cent	n	1	n	0.95	0.439722	8.83657	3.88564	0.628813
15	q22.2	59315883	60984196	0.523042	0.544377	PANCAN	15	amp	tel	n	1	n	0.95	0.158363	16	2.5338	0.627949
14	q24.2	71496209	79305092	0.31213	0.403476	WGD	14	amp	tel	n	1	n	0.95	0.141923	2.60489	0.369694	0.62682
15	q21.3	55705584	66386896	0.453951	0.590546	OV	15	amp	tel	n	1	n	0.95	0.228482	4.1521	0.948678	0.625389
15	q21.3	57523004	59962922	0.536102	0.567305	WGD	15	amp	tel	n	1	n	0.95	0.166587	7.11716	1.18563	0.625062
9	q33.3	127945970	130581722	0.14817	0.185877	PANCAN	9q	del	tel	n	2	n-ln	0.95	0.129648	1.48201	0.192139	0.62222
12	q14.3	65195976	73845240	0.63144	0.723515	OV	12q	del	tel	n	1	n	0.95	0.175436	1.9568	0.343293	0.620662
8	p11.21	40815373	41816121	0.949948	0.973597	DIPLOID	8p	del	tel	n	2	p-rn	0.95	0.102594	4.88756	0.501434	0.620195
11	p15.5	724088	1920255	0.00540269	0.0295193	PANCAN	11p	amp	tel	n	2	n-ln	0.95	0.223568	1.31024	0.292927	0.618795
17	p13.3	1180023	11092446	0.00948919	0.497349	BRCA	17p	amp	tel	n	1	n	0.95	0.44342	2.42212	1.07402	0.615421
14	q21.3	47733243	60057380	0.537284	0.681449	GBMLGG	14	del	tel	n	2	p-rn	0.95	0.446618	6.74382	3.01191	0.613568
14	q21.3	50566072	59830511	0.539938	0.648311	PANCAN	14	del	tel	n	2	p-rn	0.95	0.207121	16	3.31394	0.612781
6	q21	107181101	132840546	0.350268	0.586392	WGD	6q	amp	tel	n	1	n	0.95	0.168144	2.69461	0.453084	0.611003
1	q32.1	201894655	205292689	0.43418	0.468877	PANCAN	1q	del	tel	n	1	n	0.95	0.22007	12.2984	2.7065	0.610639
11	q22.1	101811726	102578772	0.403997	0.413815	PANCAN	11q	del	tel	n	4	p-rn-lp-ln	0.95	0.11029	2.37305	0.261724	0.608204
3	q13.33	120785742	142458855	0.260598	0.469386	WGD	3q	del	cent	n	1	n	0.95	0.185998	6.01345	1.11849	0.605128
5	q31.1	132106560	144060169	0.278728	0.370512	PANCAN	5q	del	tel	n	2	p-ln	0.95	0.118329	1.89197	0.223874	0.604833
10	q22.3	78155893	82012098	0.576665	0.618454	DIPLOID	10q	del	tel	n	2	p-rn	0.95	0.195778	7.76662	1.52053	0.604726
19	q13.11	33895256	39249070	0.640686	0.815431	DIPLOID	19q	del	tel	n	1	n	0.95	0.177615	7.39768	1.31394	0.604536
3	q13.33	120785742	144618360	0.260598	0.49019	PANCAN	3q	del	cent	n	1	n	0.95	0.190759	13.332	2.5432	0.604429
17	q12	33608309	34394290	0.83604	0.850165	WGD	17q	amp	tel	n	2	p-rn	0.95	0.116713	2.32249	0.271065	0.602269
19	q13.32	45501275	50255765	0.281433	0.436617	DIPLOID	19q	amp	tel	n	1	n	0.95	0.156599	2.53838	0.397507	0.59855
17	q12	33769836	34393295	0.836058	0.847262	PANCAN	17q	amp	tel	n	3	p-rn-rn	0.95	0.17019	3.95596	0.673264	0.598542
14	q21.2	44558042	59832232	0.539918	0.718592	DIPLOID	14	del	tel	n	1	n	0.95	0.132002	3.29965	0.435561	0.595147
6	p21.32	32869044	43777698	0.23898	0.433111	WGD	6p	del	cent	n	1	n	0.95	0.170852	2.746	0.469159	0.594351
10	q22.3	78812948	82012098	0.576665	0.611334	PANCAN	10q	del	tel	n	2	p-rn	0.95	0.12856	6.83434	0.878625	0.592654
11	q12.2	59970033	64573237	0.890444	0.949363	WGD	11q	amp	tel	n	2	p-rn	0.95	0.239012	2.09875	0.501626	0.591201
12	p13.2	12210389	13493060	0.346922	0.38623	DIPLOID	12p	amp	tel	n	1	n	0.95	0.140501	1.80853	0.2541	0.589301
1	p34.1	46039612	55474325	0.365028	0.445455	PANCAN	1p	del	tel	n	3	n-rp-ln	0.95	0.144206	2.77771	0.400562	0.589102
17	q21.2	39633679	40583940	0.724809	0.741886	PANCAN	17q	amp	tel	n	2	p-rn	0.95	0.145813	11.1982	1.63285	0.588885
5	p13.2	36184213	40566003	0.793222	0.891768	PANCAN	5p	del	tel	n	2	n-rn	0.95	0.192281	1.55814	0.299601	0.58853
17	q23.1	57958802	70590710	0.18557	0.412572	ESCASTAD	17q	del	tel	n	1	n	0.95	0.286359	2.4973	0.715124	0.586734
4	q13.3	72994295	74723014	0.838134	0.850839	PANCAN	4q	del	tel	n	2	p-rn	0.95	0.0979824	3.19989	0.313533	0.584984
5	p15.2	13687293	18547640	0.287266	0.396575	PANCAN	5p	del	tel	n	1	n	0.95	0.20382	5.17126	1.05401	0.583994
9	q31.1	105450807	116570359	0.348619	0.507698	WGD	9q	del	tel	n	1	n	0.95	0.17622	3.51074	0.618663	0.582606
12	q23.2	103245520	104844704	0.30144	0.318464	PANCAN	12q	amp	tel	n	1	n	0.95	0.141581	4.50323	0.637571	0.58104
11	q13.3	68408003	70255374	0.817717	0.841362	WGD	11q	del	tel	n	2	p-rn	0.95	0.185661	16	2.97058	0.578322
22	q12.2	30955877	31873127	0.547148	0.575895	WGD	22	del	tel	n	1	n	0.95	0.179681	10.3465	1.85908	0.577756
11	p14.1	29067634	30792024	0.576854	0.611621	OV	11p	del	tel	n	1	n	0.95	0.173407	3.80795	0.660325	0.575053
12	q23.2	102689255	109209316	0.254978	0.324386	WGD	12q	amp	tel	n	1	n	0.95	0.15679	2.92499	0.458608	0.569548
11	q12.2	60099542	62082103	0.922329	0.947705	PANCAN	11q	amp	tel	n	2	p-rn	0.95	0.193354	3.20546	0.619789	0.568527
11	q23.1	110913367	133990449	0.00194654	0.297319	BRCA	11q	amp	tel	n	1	n	0.95	0.327123	1.48622	0.486177	0.567558
19	q13.42	55426779	56652591	0.0726436	0.112653	WGD	19q	del	tel	n	3	n-lp-ln	0.95	0.1788	2.10984	0.377239	0.566649
17	q25.3	76958758	79567537	0.0242509	0.0711322	PANCAN	17q	del	tel	n	2	n-ln	0.95	0.18114	5.65861	1.025	0.563245
19	p13.2	11154129	14115718	0.457324	0.581922	DIPLOID	19p	del	tel	n	1	n	0.95	0.305389	16	4.88623	0.562026
19	q13.43	57379036	57633133	0.0406392	0.0489328	PANCAN	19q	del	tel	n	4	n-lp-ln-ln	0.95	0.169567	1.33757	0.226807	0.560763
8	p21.2	27162443	41262624	0.0394829	0.372697	PRAD	8p	amp	cent	n	1	n	0.95	0.400989	5.06805	2.03224	0.559803
19	p13.2	8505360	18271424	0.345885	0.75676	CESC	19p	del	tel	n	1	n	0.95	0.320436	1.82634	0.585225	0.559144
10	p15.1	4829934	6500292	0.114226	0.157445	PANCAN	10p	del	tel	n	1	n	0.95	0.110823	3.75466	0.416103	0.557891
4	q31.21	141544702	144496279	0.32534	0.347033	PANCAN	4q	del	tel	n	2	p-ln	0.95	0.0936381	2.80533	0.262686	0.557776
7	p15.3	23402936	27883018	0.3966	0.474881	WGD	7p	del	tel	n	1	n	0.95	0.172412	4.09044	0.705239	0.557141
3	q26.33	181815848	183897844	0.13141	0.151466	PANCAN	3q	del	tel	n	2	n-ln	0.95	0.133349	1.64493	0.21935	0.555963
15	q24.3	77162633	92424654	0.120973	0.316148	DIPLOID	15	del	tel	n	1	n	0.95	0.167355	1.5766	0.263853	0.555303
2	q31.1	171448379	192433450	0.340115	0.48274	DIPLOID	2q	del	tel	n	2	n-rn	0.95	0.177718	1.83102	0.325405	0.554822
20	q13.13	49530839	50676788	0.356533	0.391928	PANCAN	20q	del	tel	n	1	n	0.95	0.148872	2.17095	0.323195	0.553479
7	p15.3	22676860	29822279	0.383913	0.508766	DIPLOID	7p	del	tel	n	1	n	0.95	0.183664	3.6225	0.665322	0.547727
19	p13.2	13151134	17088318	0.293015	0.458659	PANCAN	19p	del	cent	n	1	n	0.95	0.212804	5.37663	1.14417	0.54477
19	p13.2	13305524	13784368	0.547836	0.567982	PANCAN	19p	del	tel	n	1	n	0.95	0.262089	16	4.19342	0.543235
19	q12	29981028	30493072	0.926477	0.94319	PANCAN	19q	del	tel	n	2	n-rn	0.95	0.174686	2.99112	0.522505	0.542789
11	p15.4	4229598	6146580	0.0760794	0.114729	PANCAN	11p	amp	tel	n	1	n	0.95	0.161243	2.85505	0.460355	0.539562
19	q13.33	48797816	58776090	0.00333367	0.329019	GBMLGG	19q	amp	tel	n	1	n	0.95	0.419659	1.87103	0.785193	0.538713
17	q21.32	47018188	51428223	0.529931	0.609182	DIPLOID	17q	del	tel	n	2	n-rn	0.95	0.249527	3.31844	0.82804	0.536597
11	q13.3	69945890	70240415	0.817908	0.821678	DIPLOID	11q	del	tel	n	2	p-rn	0.95	0.291544	16	4.6647	0.533647
12	q24.23	119568420	122148726	0.117233	0.144701	PANCAN	12q	del	tel	n	2	n-ln	0.95	0.0958757	2.50272	0.23995	0.532423
20	q13.13	49530839	53257949	0.276808	0.391928	WGD	20q	del	tel	n	1	n	0.95	0.183746	1.84567	0.339135	0.531865
9	p13.3	34448223	35394747	0.88673	0.911667	GBMLGG	9p	del	tel	n	2	p-rn	0.95	0.209515	3.27579	0.686328	0.530085
8	q21.3	90634735	103057161	0.431366	0.558422	PANCAN	8q	del	tel	n	2	n-rn	0.95	0.216837	2.41493	0.523644	0.529929
19	p13.2	9013355	10056129	0.367258	0.411129	OV	19p	del	tel	n	3	n-lp-rn	0.95	0.127563	2.71773	0.346682	0.528754
8	p11.21	41579398	41814900	0.968003	0.973568	PANCAN	8p	del	tel	n	3	p-rn-rn	0.95	0.125129	1.75169	0.219187	0.526594
7	p15.3	23402936	27024428	0.3966	0.459879	PANCAN	7p	del	tel	n	1	n	0.95	0.174981	9.48669	1.65999	0.525684
16	p13.13	10539829	11285382	0.316903	0.340801	OV	16p	del	tel	n	1	n	0.95	0.211159	3.41082	0.720224	0.52514
19	q13.33	48401420	58776090	0.00333367	0.341958	GBM	19q	amp	tel	n	1	n	0.95	0.46861	2.06247	0.966492	0.520637
18	q21.1	47079361	54011948	0.39537	0.514039	WGD	18q	amp	tel	n	1	n	0.95	0.194165	1.95361	0.379323	0.520313
22	q11.21	18410894	22096801	0.853548	0.969068	PANCAN	22	del	tel	n	1	n	0.95	0.15373	16	2.45969	0.520151
22	q13.1	40086012	41117440	0.257422	0.289748	DIPLOID	22	del	tel	n	2	n-ln	0.95	0.103001	1.67347	0.172369	0.519667
22	q13.1	38796765	39553002	0.306453	0.330154	PANCAN	22	del	tel	n	2	n-ln	0.95	0.118305	7.82828	0.926124	0.517412
4	p16.1	9596453	22264580	0.181698	0.451147	DIPLOID	4p	amp	tel	n	1	n	0.95	0.218388	4.08743	0.892645	0.516513
7	q21.3	95956038	100117279	0.611589	0.655266	WGD	7q	del	tel	n	1	n	0.95	0.188844	10.3627	1.95693	0.512193
19	p13.3	3626786	4271622	0.140636	0.167765	PANCAN	19p	amp	tel	n	1	n	0.95	0.270708	12.3302	3.3379	0.51116
7	p15.3	22676860	29822279	0.383913	0.508766	OV	7p	del	tel	n	1	n	0.95	0.168051	2.08756	0.350816	0.509228
22	q11.21	18358204	22096801	0.853548	0.970719	WGD	22	del	tel	n	2	n-rn	0.95	0.24146	5.80767	1.40232	0.508348
9	p13.3	34198058	34905958	0.88014	0.898789	WGD	9p	del	tel	n	2	p-rn	0.95	0.179538	6.16793	1.10738	0.507723
14	q24.2	71645615	73543316	0.37953	0.401728	PANCAN	14	amp	tel	n	1	n	0.95	0.164508	8.83582	1.45356	0.506782
12	p13.2	12752236	13479485	0.363527	0.385814	PANCAN	12p	amp	tel	n	1	n	0.95	0.130923	5.04555	0.660576	0.504733
9	q22.31	94159598	102301736	0.552749	0.669232	WGD	9q	amp	tel	n	1	n	0.95	0.156405	3.16241	0.494615	0.504514
4	p15.31	20537784	22264580	0.414419	0.451147	PANCAN	4p	amp	tel	n	1	n	0.95	0.183966	7.84656	1.4435	0.503951
7	q21.13	89902164	105344657	0.556722	0.718809	ESCASTADCIN	7q	del	tel	n	1	n	0.95	0.233687	3.12379	0.72999	0.503146
2	q33.1	197582013	228544377	0.0946868	0.305123	SKCM	2q	del	tel	n	1	n	0.95	0.423806	5.74158	2.43332	0.502667
4	q13.2	68986570	70319479	0.870498	0.880294	OV	4q	del	tel	n	2	p-rn	0.95	0.207829	3.62098	0.752542	0.501295
4	p16.3	2414668	8412669	0.0289426	0.156519	OV	4p	amp	tel	n	1	n	0.95	0.214693	1.88066	0.403765	0.499965
4	p16.1	6397236	9596453	0.113651	0.181698	WGD	4p	amp	tel	n	1	n	0.95	0.190416	3.66321	0.697534	0.492969
5	q12.3	63339165	70661207	0.842314	0.898535	PANCAN	5q	amp	tel	n	2	n-rn	0.95	0.279882	2.38754	0.668228	0.491542
11	q13.5	75333977	79421985	0.70039	0.752714	SKCM	11q	del	tel	n	2	p-rn	0.95	0.285468	5.15038	1.47027	0.490933
10	q23.32	92848303	122682223	0.135926	0.459234	PANSCC	10q	amp	tel	n	1	n	0.95	0.301472	2.66801	0.804331	0.487585
2	p23.2	28982827	51382941	0.321486	0.574176	BRCA	2p	del	tel	n	1	n	0.95	0.26098	1.55114	0.404816	0.484346
18	q21.2	49095650	51362457	0.440722	0.479525	PANCAN	18q	amp	tel	n	1	n	0.95	0.17984	4.12451	0.741752	0.483788
10	p15.1	5308403	6611326	0.126606	0.160318	DIPLOID	10p	del	tel	n	1	n	0.95	0.140114	2.54896	0.357144	0.483489
7	q21.3	95008026	102406679	0.587559	0.665217	DIPLOID	7q	del	tel	n	1	n	0.95	0.229828	11.9496	2.74636	0.481919
22	q11.23	25074034	26504001	0.715421	0.760238	OV	22	del	tel	n	1	n	0.95	0.173676	2.45107	0.425692	0.4815
13	q14.2	49297164	51624281	0.663234	0.687593	PANCAN	13	amp	tel	n	1	n	0.95	0.106894	4.85272	0.518725	0.481181
5	p13.3	31827425	33433424	0.695237	0.731356	WGD	5p	del	tel	n	1	n	0.95	0.197025	1.40445	0.276711	0.481118
17	q21.31	44811097	56045570	0.446954	0.648844	PANSCC	17q	del	tel	n	2	n-rn	0.95	0.380291	1.37291	0.522105	0.480465
7	q21.11	81124286	105344657	0.556722	0.810943	ESCA	7q	del	tel	n	1	n	0.95	0.271666	1.48201	0.402611	0.477752
19	q13.43	57354052	58189934	0.0224655	0.0497483	DIPLOID	19q	del	tel	n	3	n-lp-ln	0.95	0.199089	1.30723	0.260255	0.477603
17	q25.3	76728667	79475591	0.0259032	0.0752671	DIPLOID	17q	del	tel	n	2	n-ln	0.95	0.244724	4.78536	1.17109	0.476351
6	p21.1	41439249	44845514	0.719405	0.780023	WGD	6p	del	tel	n	1	n	0.95	0.197779	8.08738	1.59951	0.475442
4	q12	54710951	55550949	0.979038	0.985212	PANCAN	4q	del	tel	n	3	p-rn-rn	0.95	0.104888	1.55347	0.16294	0.471601
4	q24	101499847	109707618	0.581017	0.64134	PANCAN	4q	amp	tel	n	2	n-rn	0.95	0.166331	2.3018	0.38286	0.471174
10	q23.32	92848303	103468023	0.344149	0.459234	DIPLOID	10q	amp	tel	n	1	n	0.95	0.23898	5.25413	1.25563	0.470156
3	q27.1	183049777	185902700	0.112096	0.139579	DIPLOID	3q	del	tel	n	2	n-ln	0.95	0.209806	2.15515	0.452164	0.4695
15	q21.2	52351912	80272817	0.276374	0.633434	ESCASTADCIN	15	amp	tel	n	1	n	0.95	0.273973	2.83393	0.77642	0.468408
4	q32.1	156449829	188394336	0.00271426	0.237488	GBM	4q	del	tel	n	1	n	0.95	0.316673	1.52175	0.481896	0.467955
16	q21	64431810	72408955	0.39585	0.581918	PANSCC	16q	del	tel	n	1	n	0.95	0.281263	3.82859	1.07684	0.467645
2	q31.1	174086491	179127511	0.430549	0.46481	PANCAN	2q	del	tel	n	2	n-rn	0.95	0.177352	10.1369	1.79779	0.467561
2	q32.1	185424359	209456124	0.22442	0.387752	ESCA	2q	del	tel	n	1	n	0.95	0.333351	1.938	0.646035	0.467116
11	q23.1	111124486	116705099	0.223188	0.294617	PANCAN	11q	amp	tel	n	2	p-ln	0.95	0.166536	4.69352	0.781642	0.466215
9	p13.3	34675471	35415710	0.892717	0.912219	PANCAN	9p	del	tel	n	2	p-rn	0.95	0.182732	16	2.92372	0.465088
8	p11.23	36971355	37738616	0.859106	0.877238	BRCALUM	8p	del	tel	n	2	p-rn	0.95	0.26222	4.63219	1.21465	0.464402
19	p13.2	7309687	16973979	0.295582	0.702174	COAD	19p	del	tel	n	1	n	0.95	0.444495	1.69747	0.754519	0.463687
21	q22.11	34080643	35451192	0.378198	0.420589	DIPLOID	21	del	tel	n	1	n	0.95	0.205409	4.88165	1.00273	0.462529
11	q13.1	65670509	67060205	0.858613	0.8764	DIPLOID	11q	del	tel	n	3	p-rn-rn	0.95	0.204744	1.4019	0.287031	0.462256
19	p13.12	15467509	15629669	0.638795	0.645617	PANCAN	19p	del	tel	n	2	n-rn	0.95	0.175104	7.46625	1.30737	0.461904
5	q21.1	100714116	161315513	0.146235	0.611556	ESCASTADCIN	5q	amp	tel	n	1	n	0.95	0.355062	1.37328	0.487598	0.460579
17	q22	57235477	70590710	0.18557	0.425571	ESCASTADCIN	17q	del	tel	n	1	n	0.95	0.27591	1.74776	0.482223	0.459949
6	q21	107181101	128798980	0.387459	0.586392	DIPLOID	6q	amp	tel	n	2	n-rn	0.95	0.239246	1.98729	0.475451	0.459661
19	q12	30613187	31626577	0.88948	0.922556	DIPLOID	19q	del	tel	n	2	n-rn	0.95	0.221708	2.73541	0.606463	0.459411
6	q21	107277443	117592611	0.490583	0.585505	PANCAN	6q	amp	tel	n	1	n	0.95	0.188072	7.29238	1.37149	0.459349
16	p13.13	10512834	11285382	0.316038	0.340801	DIPLOID	16p	del	tel	n	1	n	0.95	0.184053	5.52921	1.01767	0.459346
8	p23.2	3796293	4285608	0.075117	0.0866804	PANCAN	8p	amp	tel	n	2	n-ln	0.95	0.198661	4.33662	0.861518	0.458554
14	q24.2	71496209	74083900	0.373206	0.403476	DIPLOID	14	amp	tel	n	1	n	0.95	0.190892	4.28534	0.818038	0.458416
5	p15.31	8984193	18547640	0.181493	0.396575	DIPLOID	5p	del	tel	n	1	n	0.95	0.256238	3.74978	0.960838	0.45679
19	q13.11	34374805	39486353	0.632941	0.799779	GBMLGG	19q	del	tel	n	1	n	0.95	0.184946	1.43237	0.264911	0.456566
11	q13.1	65670509	68230024	0.84364	0.8764	HNSC	11q	del	tel	n	2	p-rn	0.95	0.305225	7.9329	2.42132	0.45611
2	p23.2	30120058	31809284	0.334315	0.35337	PANCAN	2p	del	tel	n	1	n	0.95	0.254005	16	4.06408	0.455778
22	q12.2	31674199	41513922	0.244995	0.553382	BRCA	22	amp	tel	n	1	n	0.95	0.280432	1.79519	0.50343	0.453947
6	p25.2	3623257	7222813	0.0464295	0.110487	BLCA	6p	del	tel	n	2	n-ln	0.95	0.312537	1.65043	0.515819	0.448684
5	q22.1	109352941	112229713	0.523135	0.545224	WGD	5q	amp	tel	n	2	n-rn	0.95	0.191752	1.34355	0.257628	0.447445
2	q33.1	197833210	198940250	0.295892	0.303416	WGD	2q	del	tel	n	3	n-lp-rn	0.95	0.143982	2.62916	0.378551	0.442805
8	p11.23	37469998	38118376	0.87089	0.886213	BRCA	8p	del	tel	n	2	p-rn	0.95	0.232546	12.0862	2.8106	0.441453
13	q14.11	42407758	50464441	0.675374	0.759705	DIPLOID	13	amp	tel	n	1	n	0.95	0.145943	3.66201	0.534446	0.438331
2	q32.1	183954504	185416737	0.387804	0.397742	WGD	2q	del	tel	n	1	n	0.95	0.289679	16	4.63487	0.437577
8	p21.3	21528491	27752630	0.494162	0.64125	WGD	8p	amp	tel	n	2	n-rn	0.95	0.259291	1.40704	0.364833	0.436589
9	p21.1	32717495	34934379	0.841134	0.899538	ESCASTAD	9p	del	tel	n	2	p-rn	0.95	0.302789	3.487	1.05582	0.434923
15	q21.3	57483340	80272817	0.276374	0.567812	ESCASTAD	15	amp	tel	n	1	n	0.95	0.259661	3.31165	0.859907	0.432788
8	p11.21	41684488	41816121	0.970487	0.973597	WGD	8p	del	tel	n	3	p-rn-rn	0.95	0.169942	1.96005	0.333095	0.431494
10	q24.1	97274837	109789832	0.27564	0.411264	OV	10q	amp	tel	n	1	n	0.95	0.255925	3.31879	0.849361	0.430712
19	q13.12	37443624	37794849	0.688151	0.699614	WGD	19q	del	tel	n	1	n	0.95	0.16347	8.54912	1.39753	0.427854
19	p13.3	1210938	1580189	0.0389971	0.0545321	PANCAN	19p	amp	tel	n	2	n-ln	0.95	0.196451	1.8517	0.363767	0.425443
19	q13.12	36523989	40145485	0.611427	0.729631	PANSCC	19q	del	tel	n	1	n	0.95	0.193191	1.64832	0.318441	0.425332
1	p36.11	24476370	27752741	0.181212	0.209142	DIPLOID	1p	amp	tel	n	1	n	0.95	0.214994	5.45734	1.17329	0.424017
8	p11.23	37924264	38988938	0.881625	0.906786	HNSC	8p	del	tel	n	2	p-rn	0.95	0.251867	2.61487	0.658601	0.423828
17	q24.2	66267690	74032522	0.123718	0.263257	DIPLOID	17q	del	tel	n	1	n	0.95	0.384843	16	6.15749	0.423763
2	q32.3	193639152	242272532	0.00138329	0.33192	COADREAD	2q	del	tel	n	1	n	0.95	0.49336	2.46016	1.21374	0.422864
4	q28.3	134111153	141485133	0.34747	0.401665	WGD	4q	amp	tel	n	1	n	0.95	0.240094	4.37242	1.04979	0.420339
14	q21.3	49534063	51332727	0.639343	0.660383	BRCA	14	del	tel	n	2	p-rn	0.95	0.322571	5.84916	1.88677	0.418064
16	p13.13	10512834	11106707	0.316038	0.335074	PANCAN	16p	del	tel	n	1	n	0.95	0.204409	16	3.27054	0.417361
9	p13.3	34584105	35301140	0.89031	0.9092	DIPLOID	9p	del	tel	n	2	p-rn	0.95	0.221027	16	3.53643	0.417335
16	p13.13	11106707	12976146	0.335074	0.394998	WGD	16p	del	tel	n	1	n	0.95	0.223029	11.9635	2.66821	0.414613
20	q13.13	49597286	61143486	0.0332455	0.389875	BRCA	20q	del	tel	n	1	n	0.95	0.441672	1.9506	0.861527	0.414449
9	q31.2	109039618	137096950	0.0549616	0.456356	PANSCC	9q	del	tel	n	1	n	0.95	0.394255	5.71016	2.25126	0.412378
15	q14	39054255	44851206	0.729355	0.803488	PANSCC	15	amp	tel	n	1	n	0.95	0.158681	1.67882	0.266397	0.4118
5	q14.1	79209029	85942366	0.724979	0.77668	DIPLOID	5q	amp	tel	n	1	n	0.95	0.169686	6.78235	1.15087	0.410754
10	q24.1	99147935	109194872	0.282087	0.390965	WGD	10q	amp	tel	n	1	n	0.95	0.258459	9.63414	2.49003	0.409377
9	p13.3	33558244	34542636	0.863284	0.889218	PANSCC	9p	del	tel	n	2	p-rn	0.95	0.247422	4.88766	1.20931	0.406508
1	p34.3	35950140	51533628	0.27902	0.411862	BLCA	1p	del	tel	n	1	n	0.95	0.37649	1.9475	0.733214	0.405725
7	q21.13	90026246	104431187	0.56631	0.717506	ESCASTAD	7q	del	tel	n	1	n	0.95	0.230896	3.75466	0.866936	0.405636
22	q12.1	29496383	33582802	0.493565	0.621637	PANSCC	22	del	tel	n	1	n	0.95	0.278313	4.99419	1.38995	0.405306
1	p36.11	26478393	27903342	0.198278	0.210425	PANCAN	1p	amp	tel	n	1	n	0.95	0.214193	16	3.42709	0.404996
1	p36.11	27068202	30246515	0.203306	0.2304	WGD	1p	amp	tel	n	1	n	0.95	0.22487	11.5015	2.58633	0.40293
5	q14.1	79497582	85962717	0.724823	0.774465	PANCAN	5q	amp	tel	n	1	n	0.95	0.165916	13.332	2.21199	0.402585
17	p11.2	20804010	20890728	0.975323	0.979591	PANCAN	17p	del	tel	n	3	p-rp-rn	0.95	0.124079	5.33072	0.66143	0.402088
19	p13.3	1210938	4271622	0.0389971	0.167765	DIPLOID	19p	amp	tel	n	1	n	0.95	0.251431	4.62467	1.16279	0.401503
7	q32.1	127458008	143620310	0.154974	0.324616	SARC	7q	del	tel	n	1	n	0.95	0.341459	2.8258	0.964895	0.400843
2	q33.1	199862391	213469492	0.197143	0.289624	BRCA	2q	del	tel	n	1	n	0.95	0.230104	5.34267	1.22937	0.400076
10	q23.31	90619533	110865068	0.263988	0.483387	LUSC	10q	amp	tel	n	1	n	0.95	0.34531	1.56537	0.54054	0.398591
12	q22	92962234	104836543	0.301527	0.427933	OV	12q	amp	tel	n	1	n	0.95	0.301734	2.74523	0.828328	0.398527
2	q32.3	195002984	200531808	0.285074	0.322651	SARC	2q	del	tel	n	1	n	0.95	0.231993	1.78462	0.414021	0.396439
12	q14.3	66769921	73975599	0.630053	0.70676	DIPLOID	12q	del	tel	n	1	n	0.95	0.262197	16	4.19514	0.394136
19	p13.2	12678078	14619464	0.521439	0.603116	PANSCC	19p	del	tel	n	1	n	0.95	0.239743	10.103	2.42213	0.389945
6	q12	67362196	70232323	0.926403	0.952814	LGG	6q	del	tel	n	2	p-rn	0.95	0.470555	2.58477	1.21628	0.389806
2	p23.2	28782264	45026929	0.319223	0.502475	OV	2p	del	tel	n	1	n	0.95	0.454138	11.1237	5.0517	0.38625
10	q25.1	109194872	117852568	0.188265	0.282087	BRCA	10q	amp	tel	n	1	n	0.95	0.288298	1.48917	0.429325	0.385865
8	p23.1	6825412	9040858	0.146701	0.199056	WGD	8p	amp	tel	n	1	n	0.95	0.305966	7.7698	2.3773	0.385203
2	p23.2	28982827	30115546	0.321486	0.334264	WGD	2p	del	tel	n	1	n	0.95	0.232768	9.61149	2.23725	0.384722
6	p21.1	41439249	42958900	0.719405	0.746449	PANCAN	6p	del	tel	n	1	n	0.95	0.222038	16	3.5526	0.384395
2	q32.3	196217325	232772214	0.0659523	0.314398	STAD	2q	del	tel	n	1	n	0.95	0.306454	2.52507	0.773819	0.38236
2	q32.1	189162257	203678212	0.26369	0.362348	ESCASTADCIN	2q	del	tel	n	1	n	0.95	0.264738	2.70292	0.715565	0.380808
22	q12.1	28668393	33582802	0.493565	0.647587	LUSC	22	del	tel	n	1	n	0.95	0.341039	2.81471	0.959927	0.375921
19	p13.12	15012234	15895353	0.61964	0.656795	DIPLOID	19p	del	tel	n	2	n-rn	0.95	0.306573	11.862	3.63657	0.37484
7	q22.1	98108470	100117279	0.611589	0.632674	PANCAN	7q	del	tel	n	1	n	0.95	0.202113	16	3.23381	0.373319
8	p11.21	41437022	41886329	0.964638	0.975256	PANSCC	8p	del	tel	n	3	p-rn-rn	0.95	0.220978	2.01597	0.445484	0.373087
13	q33.3	108572831	109924657	0.0529933	0.0671431	PANCAN	13	del	tel	n	2	p-ln	0.95	0.160626	3.19791	0.513667	0.372899
9	p21.1	33005741	35166763	0.848728	0.90566	LUSC	9p	del	tel	n	2	p-rn	0.95	0.315326	4.00336	1.26236	0.372411
17	q12	34933485	40078016	0.733901	0.826351	ESCASTAD	17q	del	tel	n	2	n-rn	0.95	0.329457	1.53078	0.504326	0.370294
1	p32.2	56638782	63820276	0.455381	0.5166	OV	1p	amp	tel	n	1	n	0.95	0.232915	2.7052	0.630083	0.369545
1	p36.22	9773718	31334415	0.0558791	0.239674	BRCA	1p	amp	tel	n	1	n	0.95	0.378584	2.19438	0.830759	0.369352
11	q13.1	64487517	66804094	0.861891	0.891542	PANSCC	11q	del	tel	n	2	p-rn	0.95	0.260679	16	4.17087	0.368639
8	q24.12	120312904	144950719	0.00288199	0.254876	ESCASTADCIN	8q	del	tel	n	1	n	0.95	0.489126	1.84864	0.904218	0.367738
12	q21.2	77154973	120681066	0.132857	0.596207	LIHC	12q	del	tel	n	1	n	0.95	0.507609	3.70953	1.88299	0.366385
8	q24.12	120799330	145009609	0.00227967	0.249901	ESCASTAD	8q	del	tel	n	1	n	0.95	0.486734	2.35229	1.14494	0.365548
3	p21.31	46644268	52432137	0.503342	0.568909	DIPLOID	3p	amp	tel	n	1	n	0.95	0.224612	6.21353	1.39563	0.36542
1	p36.12	21568809	45849805	0.156427	0.36341	STAD	1p	amp	tel	n	1	n	0.95	0.395539	2.91366	1.15247	0.365114
20	q13.2	52355200	61989110	0.00712651	0.304691	GBMLGG	20q	del	tel	n	1	n	0.95	0.508255	1.35273	0.687532	0.365004
7	q32.3	132301400	158156563	0.00239895	0.273779	GBMLGG	7q	del	tel	n	1	n	0.95	0.564002	1.54171	0.869525	0.364986
8	p11.23	37953891	38312762	0.882325	0.890806	PANSCC	8p	del	tel	n	2	p-rn	0.95	0.259746	16	4.15594	0.363434
9	q21.33	87936628	97268900	0.62475	0.75826	BRCA	9q	del	tel	n	1	n	0.95	0.279845	2.1908	0.613084	0.359664
5	q21.2	103980992	137527916	0.328885	0.586472	BRCA	5q	amp	tel	n	1	n	0.95	0.310305	4.6626	1.44683	0.358865
15	q14	39687126	42852310	0.754917	0.795395	PANCAN	15	amp	tel	n	2	n-rn	0.95	0.310728	16	4.97164	0.357108
15	q21.3	54425796	60815439	0.5252	0.606913	BRCA	15	amp	tel	n	1	n	0.95	0.213951	2.09605	0.448452	0.356795
6	p21.2	40542238	44845514	0.703442	0.780023	DIPLOID	6p	del	tel	n	1	n	0.95	0.243314	16	3.89302	0.355717
19	p13.3	326972	5633238	0.00180719	0.225051	STAD	19p	amp	tel	n	1	n	0.95	0.681932	1.57788	1.07601	0.354323
2	q33.1	197511821	202077281	0.274571	0.3056	HNSC	2q	del	tel	n	3	n-lp-rn	0.95	0.296015	3.07155	0.909223	0.354197
10	q24.1	99147935	101004945	0.370841	0.390965	PANCAN	10q	amp	tel	n	1	n	0.95	0.251501	16	4.02402	0.353233
12	q15	69022295	72088228	0.650144	0.682782	PANCAN	12q	del	tel	n	1	n	0.95	0.203875	16	3.262	0.353112
19	p13.2	13027306	13676587	0.536131	0.563448	WGD	19p	del	tel	n	1	n	0.95	0.228536	16	3.65657	0.350764
11	p15.1	18656174	20611698	0.366942	0.406369	BRCA	11p	del	tel	n	1	n	0.95	0.184488	2.4866	0.458747	0.350452
3	p21.32	43810960	52129042	0.471245	0.565476	WGD	3p	amp	tel	n	1	n	0.95	0.243405	10.706	2.60589	0.350173
1	p34.3	38491265	65316227	0.300682	0.529352	KIPAN	1p	del	tel	n	1	n	0.95	0.287808	2.10031	0.604486	0.348751
12	q24.21	114226283	125141714	0.0853717	0.20157	ESCASTAD	12q	del	tel	n	1	n	0.95	0.29285	1.97371	0.578001	0.34756
8	p11.21	41432121	41597242	0.964523	0.968425	OV	8p	del	tel	n	2	p-rn	0.95	0.123981	1.38313	0.171481	0.346936
16	p13.2	8847502	11880407	0.262656	0.359875	ESCASTAD	16p	del	tel	n	1	n	0.95	0.302993	3.64717	1.10507	0.346524
16	p13.2	8874690	12047513	0.263528	0.365231	ESCASTADCIN	16p	del	tel	n	1	n	0.95	0.299357	2.88834	0.864644	0.343912
15	q21.3	57523004	68946462	0.421218	0.567305	STAD	15	amp	tel	n	1	n	0.95	0.275286	2.06886	0.569529	0.343559
11	q13.3	69317647	70715517	0.811827	0.829719	BRCALUM	11q	del	tel	n	2	p-rn	0.95	0.338393	5.25247	1.7774	0.342469
3	p21.31	46644268	52129042	0.503342	0.565476	PANCAN	3p	amp	tel	n	1	n	0.95	0.233785	16	3.74056	0.341989
8	q24.13	125489063	143504669	0.0176721	0.201934	PANSCC	8q	del	tel	n	1	n	0.95	0.491213	2.23807	1.09937	0.340744
3	p24.3	17521203	23257156	0.173423	0.238402	OV	3p	amp	tel	n	1	n	0.95	0.291009	2.7608	0.803417	0.339301
13	q33.3	107216958	111804327	0.0333184	0.0813353	DIPLOID	13	del	tel	n	2	p-ln	0.95	0.228807	3.28022	0.750537	0.335733
17	p11.2	19165168	19227335	0.894665	0.897724	PANCAN	17p	del	tel	n	5	p-rp-rn-lp-rn	0.95	0.228715	12.0862	2.7643	0.333134
19	p13.3	5638054	6307502	0.225253	0.253418	WGD	19p	amp	tel	n	1	n	0.95	0.286345	5.18273	1.48405	0.332711
16	q22.1	67129902	68265192	0.492503	0.518984	PRAD	16q	del	tel	n	2	p-rn	0.95	0.288681	4.77436	1.37827	0.332272
11	q13.3	69610793	70530336	0.814197	0.825967	BRCA	11q	del	tel	n	2	p-rn	0.95	0.305839	16	4.89343	0.330072
13	q12.13	25969378	30368797	0.885719	0.931769	PRAD	13	del	tel	n	2	p-rn	0.95	0.431682	2.20542	0.952038	0.330015
8	q24.13	125556035	143504669	0.0176721	0.201249	LUSC	8q	del	tel	n	1	n	0.95	0.521126	1.69747	0.884597	0.329545
6	q24.2	143309345	147881000	0.211862	0.253931	STAD	6q	del	tel	n	1	n	0.95	0.289814	2.21108	0.640801	0.329146
14	q24.2	71496209	77976324	0.327673	0.403476	OV	14	amp	tel	n	1	n	0.95	0.344541	8.96479	3.08874	0.327822
17	q12	35487337	36120157	0.805026	0.816398	DIPLOID	17q	amp	tel	n	2	p-rn	0.95	0.150249	6.27372	0.94262	0.325169
5	p15.33	1314316	1428514	0.00899789	0.0115662	PANCAN	5p	amp	tel	n	3	p-ln-ln	0.95	0.217721	3.12245	0.679822	0.325162
9	q32	116313581	125914034	0.214947	0.352293	DIPLOID	9q	del	tel	n	1	n	0.95	0.29844	11.3988	3.40186	0.325006
19	p13.2	7309687	13744939	0.295582	0.566323	SKCM	19p	del	tel	n	1	n	0.95	0.434674	3.14335	1.36633	0.324846
15	q14	39179657	43778169	0.743077	0.801884	OV	15	amp	tel	n	2	n-rn	0.95	0.352931	2.25269	0.795045	0.324121
2	q33.1	197511821	201520597	0.278354	0.3056	LUSC	2q	del	tel	n	3	n-lp-rn	0.95	0.247922	2.54328	0.630536	0.323152
11	p15.5	894450	7650789	0.00883746	0.145056	OV	11p	amp	tel	n	1	n	0.95	0.391566	1.31804	0.5161	0.322145
17	q24.1	62904578	80776042	0.00253338	0.323694	GBM	17q	del	tel	n	1	n	0.95	0.674518	1.51334	1.02077	0.321155
2	p22.2	37387486	41276577	0.416297	0.460169	DIPLOID	2p	del	tel	n	1	n	0.95	0.294912	11.9381	3.52069	0.319937
11	q13.4	71573281	78057967	0.717848	0.800848	OV	11q	del	tel	n	1	n	0.95	0.258	4.66791	1.20432	0.318426
12	q23.3	104848408	113757569	0.20656	0.301401	GBMLGG	12q	amp	tel	n	1	n	0.95	0.427364	1.58659	0.67805	0.318351
17	q24.1	63903118	72971019	0.142794	0.30575	BRCA	17q	del	tel	n	1	n	0.95	0.342548	4.97738	1.70499	0.317877
7	q32.1	127872834	146569701	0.124017	0.320262	OV	7q	del	tel	n	1	n	0.95	0.368599	3.68249	1.35736	0.317111
19	p13.2	10577640	11501776	0.43307	0.47195	BRCA	19p	del	tel	n	1	n	0.95	0.25733	8.45549	2.17585	0.317003
9	p21.1	31354658	32675417	0.80523	0.840026	LIHC	9p	del	tel	n	2	p-rn	0.95	0.450203	1.4794	0.666032	0.314539
2	q31.1	173345395	185416737	0.387804	0.469847	LUSC	2q	del	tel	n	1	n	0.95	0.365843	16	5.85349	0.314141
16	p13.12	14747102	18808403	0.451765	0.581948	STAD	16p	del	tel	n	2	n-rn	0.95	0.362997	1.30998	0.47552	0.311203
11	p15.1	16652324	18816245	0.326542	0.37017	GBMLGG	11p	del	tel	n	1	n	0.95	0.209729	1.63127	0.342125	0.310925
2	q31.1	171074364	202484571	0.271803	0.485282	BRCABAS	2q	del	tel	n	1	n	0.95	0.383774	2.98668	1.14621	0.308172
2	q33.1	197805899	198934377	0.295931	0.303601	PANCAN	2q	del	tel	n	1	n	0.95	0.340428	16	5.44685	0.307129
5	p15.33	3266760	12183983	0.0529083	0.253457	SARC	5p	del	tel	n	1	n	0.95	0.477886	1.69236	0.808753	0.306408
22	q12.2	31801625	36716400	0.395355	0.549389	COADREAD	22	del	tel	n	1	n	0.95	0.379688	1.8978	0.720572	0.305558
1	p32.3	50674403	58141173	0.404538	0.468188	LIHC	1p	del	tel	n	1	n	0.95	0.305024	5.4833	1.67254	0.305466
13	q21.33	71717824	93045502	0.229671	0.452911	GBMLGG	13	amp	tel	n	1	n	0.95	0.435833	2.72436	1.18737	0.305409
1	q31.3	196140901	205279491	0.434314	0.527628	DIPLOID	1q	del	tel	n	1	n	0.95	0.329233	12.5793	4.14152	0.302289
2	q32.3	194989599	203678212	0.26369	0.322742	ESCASTAD	2q	del	tel	n	1	n	0.95	0.301872	5.40361	1.6312	0.302057
15	q14	39687126	40877321	0.780174	0.795395	WGD	15	amp	tel	n	2	n-rn	0.95	0.309746	5.87191	1.8188	0.300589
1	p36.12	21568809	37279036	0.156427	0.290349	ESCASTAD	1p	amp	tel	n	1	n	0.95	0.399161	5.13187	2.04844	0.299517
5	q23.2	124075270	152819981	0.211467	0.43218	PANSCC	5q	amp	tel	n	1	n	0.95	0.399613	5.78194	2.31054	0.298725
5	q23.1	115687462	127887452	0.402908	0.496585	OV	5q	amp	tel	n	1	n	0.95	0.300515	6.62445	1.99075	0.293481
8	p11.23	37953891	38346584	0.882325	0.891606	LUSC	8p	del	tel	n	2	p-rn	0.95	0.337557	16	5.40091	0.292458
6	p21.33	31143652	37791896	0.536184	0.654497	GBMLGG	6p	del	tel	n	1	n	0.95	0.334614	2.30049	0.769777	0.290516
1	p34.3	37679989	49756140	0.293766	0.39671	COADREAD	1p	del	tel	n	1	n	0.95	0.209547	1.37072	0.287232	0.29037
11	q12.2	59970033	61893119	0.924748	0.949363	OV	11q	amp	tel	n	2	p-rn	0.95	0.290943	1.33818	0.389335	0.29012
2	q31.1	176333763	178430602	0.435286	0.449537	PANSCC	2q	del	tel	n	1	n	0.95	0.370087	16	5.9214	0.28774
8	p22	18780426	19669367	0.42922	0.450228	PANCAN	8p	amp	tel	n	1	n	0.95	0.318205	16	5.09128	0.286579
1	p34.3	37004808	66612407	0.288011	0.540401	KIRP	1p	del	tel	n	1	n	0.95	0.442893	1.38571	0.613723	0.283792
5	q14.1	79209029	89302881	0.699176	0.77668	KIPAN	5q	amp	tel	n	2	p-rn	0.95	0.372928	13.0396	4.86284	0.282209
12	q15	68118697	71269184	0.658863	0.692401	PANSCC	12q	del	tel	n	1	n	0.95	0.304268	5.89311	1.79309	0.277412
17	q24.3	68820968	74082402	0.122822	0.217373	WGD	17q	del	tel	n	1	n	0.95	0.339891	16	5.43825	0.276771
8	q12.1	60714731	88779091	0.135559	0.422599	BRCALUM	8q	del	cent	n	1	n	0.95	0.454843	1.38857	0.631579	0.274225
19	p13.2	13034045	16141295	0.536415	0.667142	HNSC	19p	del	tel	n	1	n	0.95	0.335085	5.9348	1.98866	0.273355
12	q14.3	65195976	72005864	0.651021	0.723515	LUSC	12q	del	tel	n	1	n	0.95	0.337602	2.72436	0.91975	0.271345
2	q24.3	169040418	178826184	0.432597	0.499106	SKCM	2q	del	tel	n	2	n-rn	0.95	0.353792	1.35444	0.479189	0.266911
9	q34.13	135013785	137007089	0.0562472	0.0847638	OV	9q	amp	tel	n	1	n	0.95	0.28155	3.46073	0.97437	0.264841
6	p21.1	41080251	46572297	0.713017	0.810753	STAD	6p	del	tel	n	1	n	0.95	0.3061	2.30135	0.704441	0.264818
17	q24.3	67895465	68616595	0.221046	0.234005	PANCAN	17q	del	tel	n	1	n	0.95	0.358661	16	5.73858	0.262826
4	q32.3	166070952	187599837	0.00855337	0.166778	HNSC	4q	amp	tel	n	1	n	0.95	0.500676	1.44821	0.725082	0.261279
3	q25.33	160522615	172155962	0.244525	0.356596	LUAD	3q	del	tel	n	1	n	0.95	0.391167	3.65152	1.42835	0.260056
3	q26.2	169832115	179784455	0.171036	0.266912	DIPLOID	3q	del	tel	n	1	n	0.95	0.465557	16	7.44891	0.260026
5	p15.33	1373493	7373630	0.0103288	0.145272	GBMLGG	5p	amp	tel	n	1	n	0.95	0.455563	1.39928	0.637459	0.25843
10	q23.31	91191195	101292997	0.367719	0.477192	ESCASTADCIN	10q	amp	tel	n	1	n	0.95	0.392767	1.90745	0.749184	0.256669
6	q24.1	140938658	151452070	0.179	0.275747	OV	6q	amp	tel	n	1	n	0.95	0.405805	2.39178	0.970595	0.255068
19	q12	29807305	30452060	0.927816	0.94886	OV	19q	del	tel	n	3	p-rn-rn	0.95	0.304783	2.96865	0.904794	0.253951
2	q32.3	196708970	198917935	0.296043	0.311056	DIPLOID	2q	del	tel	n	1	n	0.95	0.428824	16	6.86118	0.25192
5	q12.3	62069672	67743504	0.864717	0.908283	DIPLOID	5q	amp	tel	n	2	n-rn	0.95	0.390217	2.41614	0.942818	0.251334
16	p13.2	8925726	12047513	0.265164	0.365231	BRCA	16p	del	tel	n	1	n	0.95	0.384109	2.42505	0.931483	0.250825
11	q13.3	69945890	70240415	0.817908	0.821678	HNSC	11q	del	tel	n	4	p-rn-lp-rn	0.95	0.33041	4.04797	1.33749	0.249966
17	q22	56074505	70590710	0.18557	0.446434	ESCA	17q	del	tel	n	1	n	0.95	0.457277	2.84889	1.30273	0.249823
6	p21.1	41439249	42977486	0.719405	0.74678	ESCASTAD	6p	del	tel	n	1	n	0.95	0.275803	4.27043	1.1778	0.246934
5	q14.1	79209029	86940596	0.717314	0.77668	KIRC	5q	amp	tel	n	2	p-rn	0.95	0.382956	13.332	5.10557	0.24658
1	p35.1	32775347	44923598	0.251957	0.355515	ESCASTADCIN	1p	amp	tel	n	1	n	0.95	0.382873	3.76303	1.44076	0.245613
6	p25.3	2219728	6897007	0.0214522	0.104689	ESCASTAD	6p	amp	tel	n	1	n	0.95	0.381942	2.4879	0.950235	0.244009
1	q42.3	236308247	245381340	0.0248367	0.117482	PANSCC	1q	del	tel	n	1	n	0.95	0.364061	2.92989	1.06666	0.240666
3	q25.1	149055914	172367460	0.242488	0.467061	BRCA	3q	del	tel	n	1	n	0.95	0.417234	3.16767	1.32166	0.238933
6	p24.1	11786631	17573985	0.191705	0.294698	BRCA	6p	del	tel	n	1	n	0.95	0.378202	9.86149	3.72964	0.238611
16	q21	62564668	70253820	0.446119	0.625469	SKCM	16q	del	tel	n	1	n	0.95	0.38765	2.61548	1.01389	0.23851
14	q21.3	49492042	52669001	0.623712	0.660875	LGG	14	del	tel	n	2	p-rn	0.95	0.508346	6.39773	3.25226	0.238056
17	p13.1	9710862	11101045	0.429352	0.497772	DIPLOID	17p	amp	tel	n	1	n	0.95	0.328653	6.6602	2.1889	0.236997
21	q21.3	30897807	34818925	0.397754	0.519034	PANSCC	21	amp	tel	n	1	n	0.95	0.333548	2.02093	0.674076	0.23635
1	q25.3	183648675	194343959	0.545976	0.655185	OV	1q	del	tel	n	1	n	0.95	0.374623	3.09446	1.15926	0.236235
3	q26.2	170147874	172215574	0.243951	0.26387	PANCAN	3q	del	tel	n	1	n	0.95	0.438149	16	7.01039	0.235445
19	p13.3	1204593	8507177	0.0387302	0.345962	BRCA	19p	amp	tel	n	1	n	0.95	0.509671	2.53513	1.29208	0.232573
19	p13.2	8878707	12464192	0.361593	0.51244	BRCABAS	19p	del	tel	n	1	n	0.95	0.405787	3.54942	1.44031	0.231956
11	q13.1	64396735	67770618	0.84952	0.892704	CESC	11q	del	tel	n	2	p-rn	0.95	0.289371	4.216	1.21999	0.231651
11	q12.1	56670809	57851912	0.976473	0.991591	PANCAN	11q	amp	tel	n	3	p-rn-rn	0.95	0.331507	1.66956	0.553471	0.229556
12	q24.13	113231973	120420669	0.135629	0.212155	BLCA	12q	del	tel	n	1	n	0.95	0.379452	2.0021	0.7597	0.228785
13	q14.2	47940659	51624281	0.663234	0.701791	BRCA	13	amp	tel	n	1	n	0.95	0.221323	2.02287	0.447708	0.226427
1	p34.3	36387819	47068677	0.282751	0.3738	BRCABAS	1p	del	tel	n	1	n	0.95	0.343216	1.36032	0.466884	0.22603
19	q13.11	35430385	39955633	0.617624	0.765326	LUAD	19q	del	tel	n	1	n	0.95	0.301201	2.94367	0.886637	0.225924
11	q13.2	68022005	69945890	0.821678	0.846302	ESCASTAD	11q	del	tel	n	1	n	0.95	0.189915	1.51545	0.287807	0.224872
10	q22.2	75650497	81244526	0.584983	0.645605	LGG	10q	del	tel	n	1	n	0.95	0.361819	3.99864	1.44678	0.222399
16	q21	64411943	68805783	0.479894	0.582381	TGCT	16q	del	tel	n	1	n	0.95	0.407863	1.80853	0.737631	0.221447
11	q13.3	70071718	70240415	0.817908	0.820067	PANSCC	11q	del	tel	n	4	p-rn-lp-rn	0.95	0.378609	16	6.05775	0.220966
19	q13.33	48018859	50252314	0.281545	0.354444	OV	19q	amp	tel	n	1	n	0.95	0.401004	5.0677	2.03217	0.219999
8	p22	17526746	21367399	0.399593	0.490355	DIPLOID	8p	amp	tel	n	1	n	0.95	0.367378	9.38342	3.44726	0.219908
1	q31.3	198029451	205167655	0.435456	0.508344	GBMLGG	1q	del	tel	n	1	n	0.95	0.426169	3.66321	1.56115	0.219811
10	q23.1	83225777	99067303	0.391839	0.563513	ESCASTAD	10q	amp	tel	n	1	n	0.95	0.360681	2.33965	0.843866	0.217927
17	p13.1	9114837	10228815	0.400017	0.454844	PANCAN	17p	amp	tel	n	1	n	0.95	0.332551	16	5.32082	0.215647
10	q23.1	85891595	99067303	0.391839	0.534623	STAD	10q	amp	tel	n	1	n	0.95	0.373314	1.37051	0.511631	0.215444
6	p21.1	41439249	45106685	0.719405	0.784671	ESCASTADCIN	6p	del	tel	n	1	n	0.95	0.292342	4.1409	1.21056	0.214255
2	p25.1	9283099	17388272	0.099258	0.19069	GBMLGG	2p	del	tel	n	1	n	0.95	0.422386	2.45755	1.03803	0.213546
15	q14	37707539	40828921	0.780793	0.82071	DIPLOID	15	amp	tel	n	1	n	0.95	0.155133	5.29577	0.821547	0.21182
11	q24.2	125771604	132362621	0.0227817	0.107143	GBMLGG	11q	del	tel	n	1	n	0.95	0.405265	2.25479	0.913789	0.210916
14	q12	32230753	34991143	0.830503	0.862793	GBMLGG	14	del	tel	n	3	p-rn-rn	0.95	0.384014	2.64635	1.01624	0.210806
7	p15.2	25655407	38789904	0.435958	0.665459	GBMLGG	7p	del	tel	n	1	n	0.95	0.487727	2.00734	0.979032	0.210007
16	p13.2	8764428	10215441	0.259993	0.306505	BLCA	16p	del	tel	n	1	n	0.95	0.284436	2.56542	0.729698	0.207917
2	q31.3	181830637	188391120	0.367589	0.412177	BLCA	2q	del	tel	n	1	n	0.95	0.299265	7.37093	2.20586	0.20781
3	p22.1	40260181	52129042	0.43102	0.565476	BRCA	3p	amp	tel	n	1	n	0.95	0.369772	9.30988	3.44254	0.207689
18	q11.2	19404298	20069698	0.976379	0.987769	ESCASTADCIN	18q	del	tel	n	3	p-rp-rn	0.95	0.225311	1.38195	0.311367	0.207141
7	p15.2	25655407	40263420	0.435958	0.691206	LGG	7p	del	tel	n	2	n-rn	0.95	0.578868	1.70598	0.987538	0.207116
8	q24.13	125999170	129681896	0.15905	0.196717	PANCAN	8q	del	tel	n	1	n	0.95	0.460587	16	7.36939	0.206925
1	p34.2	41039049	41756048	0.322401	0.328513	PANCAN	1p	del	tel	n	1	n	0.95	0.27524	16	4.40383	0.206158
4	q28.3	136141690	143882544	0.329851	0.386742	BRCA	4q	amp	tel	n	1	n	0.95	0.393715	3.35382	1.32045	0.204411
2	p16.1	56950711	63748452	0.636985	0.713668	ESCASTAD	2p	del	tel	n	1	n	0.95	0.371261	2.47361	0.918355	0.203457
1	p35.3	29162568	41039049	0.22116	0.322401	SARC	1p	del	tel	n	1	n	0.95	0.448614	6.82756	3.06294	0.20256
5	q33.2	152819981	168889374	0.0880796	0.211467	SKCM	5q	amp	tel	n	1	n	0.95	0.480205	2.2405	1.0759	0.200207
17	p13.1	9114837	10228815	0.400017	0.454844	WGD	17p	amp	tel	n	1	n	0.95	0.354732	12.2984	4.36262	0.200024
2	q31.1	172476110	176300600	0.449762	0.475755	HNSC	2q	del	tel	n	1	n	0.95	0.355	11.2425	3.99108	0.197912
3	p22.1	42726815	52432137	0.458963	0.568909	PANSCC	3p	amp	tel	n	1	n	0.95	0.34954	3.5159	1.22895	0.197778
6	p24.1	12772924	20974380	0.209258	0.355211	OV	6p	del	tel	n	1	n	0.95	0.445007	9.11463	4.05608	0.197081
1	p34.3	39090285	47907662	0.305789	0.380952	LUSC	1p	del	tel	n	2	p-ln	0.95	0.334225	3.32968	1.11286	0.195547
17	p11.2	20804010	20893761	0.975323	0.979741	DIPLOID	17p	del	tel	n	2	p-rn	0.95	0.128009	2.36405	0.302618	0.192155
8	p23.1	6825412	11072156	0.146701	0.247059	OV	8p	amp	tel	n	1	n	0.95	0.472398	4.20215	1.98509	0.190217
1	q32.3	212935718	221859212	0.26502	0.356137	LGG	1q	del	tel	n	1	n	0.95	0.427529	1.32419	0.56613	0.188977
7	q21.3	96795040	103258807	0.578615	0.64646	PANSCC	7q	del	tel	n	1	n	0.95	0.310116	16	4.96186	0.188366
17	p12	11588360	13111657	0.521757	0.596729	SARC	17p	del	tel	n	1	n	0.95	0.299691	2.75945	0.826982	0.188099
2	q33.1	197833210	198934377	0.295931	0.303416	PANSCC	2q	del	tel	n	3	n-lp-rn	0.95	0.281554	13.332	3.75369	0.187489
11	q13.1	64396735	69945890	0.821678	0.892704	ESCASTADCIN	11q	del	tel	n	1	n	0.95	0.221494	1.92749	0.426929	0.187346
14	q12	33035384	37473353	0.801466	0.85338	LUAD	14	del	tel	n	1	n	0.95	0.260807	2.10642	0.549368	0.187158
7	q33	136335760	150259750	0.0852852	0.231434	PRAD	7q	del	tel	n	1	n	0.95	0.643824	1.86012	1.19759	0.183397
2	q33.2	204198512	223810579	0.12686	0.260154	PRAD	2q	del	tel	n	1	n	0.95	0.607938	3.18429	1.93585	0.180514
1	p35.1	34390606	47318400	0.265726	0.375929	HNSC	1p	del	tel	n	1	n	0.95	0.396857	4.4309	1.75843	0.174025
1	p35.3	28013783	37176009	0.211367	0.28947	LGG	1p	del	tel	n	1	n	0.95	0.487563	1.64832	0.803661	0.173914
8	p11.21	41744611	41886329	0.971907	0.975256	COADREAD	8p	del	tel	n	2	p-rn	0.95	0.167186	2.09622	0.35046	0.173597
16	p13.3	3898491	5092118	0.104018	0.142279	UCEC	16p	amp	tel	n	1	n	0.95	0.427843	2.00697	0.858667	0.172953
3	q26.2	170147874	172231928	0.243794	0.26387	WGD	3q	del	tel	n	1	n	0.95	0.418909	16	6.70255	0.169829
8	q24.13	125999170	129697563	0.15889	0.196717	WGD	8q	del	tel	n	1	n	0.95	0.426238	16	6.81981	0.169545
1	p34.2	41039049	44433864	0.322401	0.35134	WGD	1p	del	tel	n	1	n	0.95	0.197159	16	3.15455	0.169021
11	q13.3	70071718	70240415	0.817908	0.820067	PANCAN	11q	del	tel	n	2	p-rn	0.95	0.238073	16	3.80916	0.167664
19	p13.3	827975	5051133	0.0228852	0.20056	ESCASTADCIN	19p	amp	tel	n	1	n	0.95	0.70971	2.99417	2.12499	0.167516
2	p23.3	27370055	29757473	0.303293	0.330224	PANSCC	2p	del	tel	n	1	n	0.95	0.442827	10.9556	4.85146	0.164626
2	q32.2	190687357	199081994	0.294928	0.351982	UCEC	2q	del	tel	n	1	n	0.95	0.453583	3.90087	1.76937	0.161323
5	q23.2	125689461	138978863	0.317744	0.419785	UCEC	5q	amp	tel	n	1	n	0.95	0.493334	2.45803	1.21263	0.160982
17	q12	36122951	37223758	0.785193	0.804975	OV	17q	amp	tel	n	1	n	0.95	0.150391	1.64905	0.248001	0.157087
12	q14.1	62718691	71066471	0.661021	0.749886	SKCM	12q	del	tel	n	1	n	0.95	0.351558	1.58796	0.558262	0.156271
13	q14.2	50044584	64946542	0.523788	0.679769	LIHC	13	amp	tel	n	1	n	0.95	0.297431	1.75087	0.520763	0.153414
19	p13.2	13058969	14555178	0.537463	0.600411	UCEC	19p	del	tel	n	1	n	0.95	0.362423	8.88145	3.21884	0.152352
9	q31.3	112723383	128620254	0.176231	0.403655	HNSC	9q	del	tel	n	1	n	0.95	0.580583	4.61059	2.67683	0.151238
5	q31.1	130759809	136151873	0.339451	0.380853	LUAD	5q	amp	tel	n	1	n	0.95	0.428215	5.16349	2.21108	0.151174
2	q31.1	173345395	176149145	0.450791	0.469847	OV	2q	del	tel	n	1	n	0.95	0.417208	16	6.67533	0.150355
6	p21.33	31143652	38465656	0.536184	0.666487	LGG	6p	del	tel	n	1	n	0.95	0.466693	2.3629	1.10275	0.150349
19	p13.13	13925410	14555178	0.573916	0.600411	OV	19p	del	tel	n	1	n	0.95	0.391319	16	6.2611	0.149681
5	q23.1	115506747	123435790	0.43709	0.497972	ESCASTAD	5q	amp	tel	n	1	n	0.95	0.365046	2.64132	0.964205	0.14859
7	q21.3	95320948	105359694	0.556564	0.661932	HNSC	7q	del	tel	n	1	n	0.95	0.399478	10.6149	4.24041	0.147385
17	q23.3	61137317	73996167	0.124372	0.355453	CESC	17q	del	tel	n	1	n	0.95	0.57258	4.6925	2.68683	0.147177
8	q24.12	120312904	138444172	0.0694305	0.254876	PRAD	8q	del	tel	n	1	n	0.95	0.715634	2.67931	1.91741	0.14573
6	p24.1	12676191	15348065	0.207536	0.255085	BRCALUM	6p	del	tel	n	1	n	0.95	0.493017	3.78164	1.86442	0.145451
1	p35.2	31740845	51659055	0.243138	0.412931	CESC	1p	del	tel	n	1	n	0.95	0.608338	4.94428	3.00779	0.142071
1	p35.2	31139580	48734666	0.238013	0.388002	MESO	1p	del	tel	n	1	n	0.95	0.532127	2.92089	1.55429	0.13665
6	p22.3	19627445	22045044	0.331241	0.374265	BLCA	6p	del	tel	n	1	n	0.95	0.519883	9.21983	4.79324	0.136487
9	q33.3	125956460	131905853	0.129227	0.21434	UCEC	9q	amp	tel	n	1	n	0.95	0.630955	3.25159	2.05161	0.136315
2	p16.1	56950711	64736072	0.636985	0.72481	ESCASTADCIN	2p	del	tel	n	1	n	0.95	0.418772	2.92989	1.22696	0.135237
1	p34.3	39090285	46035470	0.305789	0.364993	PANSCC	1p	del	tel	n	1	n	0.95	0.266426	7.77392	2.07118	0.133246
16	p13.12	14747102	19426403	0.451765	0.601758	BRCABAS	16p	del	tel	n	1	n	0.95	0.510854	1.38076	0.705366	0.132544
3	p25.2	12673371	17338547	0.118505	0.171354	PRAD	3p	del	tel	n	1	n	0.95	0.481266	1.7407	0.837738	0.13177
17	q25.1	73844409	75394976	0.0992343	0.127099	SARC	17q	del	tel	n	1	n	0.95	0.46882	4.81445	2.25711	0.129921
8	q24.12	120312904	129435017	0.161575	0.254876	LUAD	8q	del	tel	n	1	n	0.95	0.585654	3.36607	1.97135	0.129093
1	p34.3	39544148	43554651	0.309658	0.343845	BRCA	1p	del	tel	n	1	n	0.95	0.184121	5.02728	0.925628	0.12744
17	p12	11101045	12245838	0.497772	0.554116	OV	17p	amp	tel	n	1	n	0.95	0.355598	4.99419	1.77592	0.126074
5	q31.2	137407249	146835534	0.257418	0.329812	ESCA	5q	amp	tel	n	1	n	0.95	0.486886	2.71882	1.32376	0.123995
2	p16.1	58408289	64675020	0.653427	0.724121	OV	2p	del	tel	n	2	n-rn	0.95	0.528478	3.07149	1.62321	0.123521
5	q33.3	157915092	165398694	0.114882	0.172344	GBMLGG	5q	amp	tel	n	1	n	0.95	0.521771	2.11357	1.1028	0.123512
17	q24.3	69832042	70725325	0.183151	0.199203	PANSCC	17q	del	tel	n	1	n	0.95	0.574675	16	9.1948	0.12071
3	q26.1	166150574	179829018	0.170607	0.302379	ESCASTAD	3q	del	tel	n	1	n	0.95	0.655834	6.39797	4.19601	0.1188
8	q24.13	125999170	128762863	0.16845	0.196717	DIPLOID	8q	del	tel	n	1	n	0.95	0.506509	16	8.10414	0.116902
10	q26.13	124017378	132914908	0.0250352	0.121457	TGCT	10q	del	tel	n	1	n	0.95	0.627085	1.68324	1.05553	0.116408
2	p23.3	25280871	30650458	0.279725	0.340298	LUSC	2p	del	tel	n	1	n	0.95	0.516859	7.3427	3.79514	0.115708
17	q24.3	68555886	74466972	0.115911	0.222137	LUSC	17q	del	tel	n	1	n	0.95	0.595955	12.5164	7.45923	0.114287
3	q26.33	180768109	186252770	0.108723	0.16156	LGG	3q	del	tel	n	1	n	0.95	0.573787	4.98261	2.85896	0.112395
21	q22.12	36551028	39875587	0.241352	0.34418	PRAD	21	del	tel	n	1	n	0.95	0.537696	1.69149	0.909506	0.111901
19	p13.3	827975	2551470	0.0228852	0.0953955	ESCASTAD	19p	amp	tel	n	1	n	0.95	0.669064	3.52236	2.35668	0.107136
17	q24.3	68761824	74032522	0.123718	0.218436	HNSC	17q	del	tel	n	1	n	0.95	0.603579	9.27486	5.59811	0.106207
1	p34.3	39544148	40169724	0.309658	0.31499	DIPLOID	1p	del	tel	n	1	n	0.95	0.355569	16	5.6891	0.103121
19	p13.3	1728501	3051550	0.0607718	0.116435	OV	19p	amp	tel	n	1	n	0.95	0.610099	1.79061	1.09245	0.100201
17	q25.1	73242156	77630846	0.0590544	0.137922	SKCM	17q	del	tel	n	1	n	0.95	0.633813	2.05689	1.30368	0.0992677
9	q31.1	107643944	112723383	0.403655	0.476323	SARC	9q	del	tel	n	1	n	0.95	0.522576	6.65949	3.48009	0.098497
3	q26.1	165960318	176613173	0.201587	0.304211	ESCASTADCIN	3q	del	tel	n	1	n	0.95	0.648258	5.53069	3.58531	0.0969892
17	q25.1	71625475	74082402	0.122822	0.166974	LUAD	17q	del	tel	n	1	n	0.95	0.545648	2.92598	1.59656	0.0953433
2	q32.3	194059817	202100035	0.274416	0.329061	LIHC	2q	del	tel	n	1	n	0.95	0.561839	5.20225	2.92283	0.0932778
1	q32.1	201370246	209278401	0.393482	0.474231	BRCA	1q	del	tel	n	1	n	0.95	0.536312	3.89584	2.08938	0.0909801
12	p13.33	1944497	6102125	0.0323186	0.159731	LGG	12p	del	tel	n	1	n	0.95	0.691225	2.38634	1.6495	0.0859611
11	q24.2	126212410	131836606	0.0295144	0.101501	LGG	11q	del	tel	n	1	n	0.95	0.651033	3.57715	2.32885	0.0794622
1	q31.2	192202678	209278401	0.393482	0.567841	BRCALUM	1q	del	tel	n	1	n	0.95	0.616312	1.57308	0.969506	0.0742019
1	p36.12	21404668	39652190	0.155027	0.310579	PRAD	1p	amp	tel	n	1	n	0.95	0.754213	1.42747	1.07662	0.0734639
12	q12	40338408	40521492	0.986183	0.988132	LGG	12q	del	tel	n	2	p-rn	0.95	0.759092	4.53311	3.44105	0.0734537
1	p34.3	39544148	50655714	0.309658	0.404378	UCEC	1p	del	tel	n	1	n	0.95	0.531557	9.03843	4.80444	0.0724499
8	q23.3	115453296	119379239	0.264425	0.304579	BRCA	8q	del	tel	n	1	n	0.95	0.588901	9.29726	5.47516	0.07132
8	q24.21	127984878	131056737	0.144989	0.176407	GBMLGG	8q	del	tel	n	1	n	0.95	0.624233	7.50841	4.68699	0.0693528
12	q12	40338408	40521492	0.986183	0.988132	GBMLGG	12q	del	tel	n	2	p-rn	0.95	0.763854	5.06805	3.87125	0.068207
8	p21.3	19174346	24603403	0.438529	0.566828	PRAD	8p	amp	tel	n	1	n	0.95	0.482762	1.58351	0.76446	0.0674735
5	p15.33	1325803	4405805	0.00925623	0.0785254	ACC	5p	amp	tel	n	1	n	0.95	0.68644	1.61952	1.11171	0.0667429
19	p13.3	6190970	7112265	0.248515	0.287276	SARC	19p	del	tel	n	1	n	0.95	0.584066	11.3728	6.64246	0.0665972
3	q26.1	163768896	181216924	0.157236	0.325323	LUSC	3q	del	tel	n	1	n	0.95	0.813118	1.41846	1.15337	0.0650552
2	p24.3	12421708	17924576	0.134664	0.19674	GBM	2p	del	tel	n	1	n	0.95	0.633939	2.98282	1.89093	0.0639751
1	p34.3	38572176	41338665	0.301372	0.324955	OV	1p	del	tel	n	1	n	0.95	0.460982	16	7.3757	0.061693
1	p35.3	28718701	32962670	0.217376	0.253554	GBMLGG	1p	del	tel	n	1	n	0.95	0.619126	16	9.90601	0.0616425
15	q21.2	52123815	59962922	0.536102	0.636351	UCEC	15	amp	tel	n	1	n	0.95	0.401926	1.58614	0.637512	0.0608242
2	q24.3	167075021	175531410	0.45499	0.512464	KIPAN	2q	del	tel	n	1	n	0.95	0.509445	7.49637	3.81899	0.0580486
2	q35	219790059	222914494	0.13295	0.154186	GBMLGG	2q	del	tel	n	1	n	0.95	0.623267	16	9.97227	0.0570818
2	q36.3	227766383	231701318	0.0732306	0.0999745	GBM	2q	del	tel	n	1	n	0.95	0.608619	4.36279	2.65527	0.0568565
3	p21.31	45371687	55235020	0.488926	0.600662	LUSC	3p	amp	tel	n	1	n	0.95	0.440449	2.07637	0.914534	0.0554047
6	p22.3	22903331	28999218	0.389539	0.498022	PRAD	6p	del	tel	n	1	n	0.95	0.61938	3.07015	1.90159	0.0452419
3	q26.2	169832115	176613173	0.201587	0.266912	STAD	3q	del	tel	n	1	n	0.95	0.663153	4.46953	2.96398	0.0436905
2	q32.2	190148619	193438841	0.333282	0.355644	CESC	2q	del	tel	n	1	n	0.95	0.517339	16	8.27743	0.039791
2	q35	220692980	222914494	0.13295	0.148049	LGG	2q	del	tel	n	1	n	0.95	0.645598	16	10.3296	0.0385587
8	q24.21	128493073	133354449	0.121488	0.17121	LGG	8q	del	tel	n	1	n	0.95	0.735379	6.79745	4.9987	0.0377472
3	q26.2	170147874	181216924	0.157236	0.26387	PANSCC	3q	del	tel	n	1	n	0.95	0.813118	2.92504	2.3784	0.0366848
3	q26.33	182448692	185214091	0.118729	0.14537	GBMLGG	3q	del	tel	n	1	n	0.95	0.643018	13.332	8.57273	0.0350846
2	q24.3	166652092	175531410	0.45499	0.515338	KIRC	2q	del	tel	n	1	n	0.95	0.5467	6.26772	3.42656	0.0344473
8	q24.12	119859757	129022892	0.165791	0.25951	COAD	8q	del	tel	n	1	n	0.95	0.805229	3.34164	2.69078	0.0328857
1	p35.2	31139580	33314296	0.238013	0.256551	GBM	1p	del	tel	n	1	n	0.95	0.662952	16	10.6072	0.0298688
3	q26.2	167703039	172267718	0.243449	0.287423	OV	3q	del	tel	n	1	n	0.95	0.680853	16	10.8936	0.0270736
12	q21.32	88500551	94443572	0.412164	0.47543	PRAD	12q	del	tel	n	1	n	0.95	0.603287	6.29254	3.79621	0.0255631
3	q26.33	181393775	185214091	0.118729	0.155533	GBM	3q	del	tel	n	1	n	0.95	0.744267	6.56311	4.88471	0.0246683
8	q24.12	120799330	129022892	0.165791	0.249901	COADREAD	8q	del	tel	n	1	n	0.95	0.805229	5.3959	4.34493	0.0227996
3	q26.1	165960318	171690969	0.249005	0.304211	PRAD	3q	del	tel	n	1	n	0.95	0.729461	7.95532	5.8031	0.0177645
17	q24.3	67308195	70380423	0.189349	0.244558	GBMLGG	17q	del	tel	n	1	n	0.95	0.735629	6.80283	5.00436	0.0169411
20	q13.33	60300362	61410100	0.0250105	0.0592872	LGG	20q	del	tel	n	1	n	0.95	0.807581	1.86492	1.50607	0.0150262
4	q28.3	132364171	151612960	0.273037	0.414504	BRCALUM	4q	amp	tel	n	1	n	0.95	0.639824	1.81863	1.16361	0
5	q23.2	122336034	132690231	0.366031	0.445534	LUSC	5q	amp	tel	n	1	n	0.95	0.549613	3.93789	2.16431	0
17	q24.2	65579342	70583956	0.185691	0.275627	LGG	17q	del	tel	n	1	n	0.95	0.788948	3.62675	2.86131	0

## Sheet: Table S5b
Table S5b
Pan-cancer selection and mechanism scores, with associated information and rates of SCNAs affecting each arm. Log2 scores (in bold) are reflected in figures.
type	arm	direction	selection_score_p	log_selection_score_p	selection_score_n	log_selection_score_n	selection_score_net	log_selection_score_net	telomeric_mechanism_score	log_telomeric_mechanism_score	arm_length	centromere_length	RTLU	aSCNAs	aSCNA_rate	cSCNAs	cSCNA_rate	tSCNAs	tSCNA_rate	pSCNAs	pSCNA_rate
PANCAN	13	amp	1.52096	0.604981	0.481181	-1.05535	0.731857	-0.450366	6.92612	2.79205	95536653	19450805	13.82	928	0.0853569	327	0.0300773	763	0.0701803	1090	0.100258
PANCAN	14	amp	1	0	0.506782	-0.980564	0.506782	-0.980564	7.98947	2.9981	85486671	20501367	13.29	895	0.0823216	594	0.0546358	504	0.0463576	1098	0.100993
PANCAN	15	amp	1.85069	0.888064	0.224246	-2.15685	0.415009	-1.26878	8.56593	3.09861	78196623	23687684	12.52	703	0.0646615	318	0.0292494	810	0.0745033	1128	0.103753
PANCAN	21	amp	1	0	0.63819	-0.647943	0.63819	-0.647943	12.8672	3.68563	32331154	15347620	10.87	1049	0.0964864	342	0.031457	348	0.0320088	690	0.0634658
PANCAN	22	amp	1	0	1	0	1	0	7.74123	2.95256	31907083	17423929	11.19	819	0.0753311	471	0.0433223	247	0.0227189	718	0.0660412
PANCAN	10p	amp	11.0173	3.4617	1	0	11.0173	3.4617	10.6145	3.40796	38648761	3883970	11.45	1082	0.0995217	269	0.0247425	487	0.044794	756	0.0695364
PANCAN	10q	amp	1	0	0.353233	-1.50131	0.353233	-1.50131	6.3962	2.67721	92277118	3883970	14.04	513	0.0471854	597	0.0549117	380	0.0349522	977	0.0898639
PANCAN	11p	amp	1	0	0.333878	-1.58261	0.333878	-1.58261	11.2568	3.49273	49599211	5958468	12.22	654	0.0601545	475	0.0436902	228	0.0209713	703	0.0646615
PANCAN	11q	amp	3.74228	1.90392	0.0608451	-4.03871	0.227699	-2.1348	6.29105	2.6533	78128733	5958468	14.23	651	0.0598786	599	0.0550957	447	0.0411148	1046	0.0962104
PANCAN	12p	amp	1.44599	0.53206	0.504733	-0.986408	0.72984	-0.454348	20.4774	4.35596	32631206	5702459	10.62	2069	0.190305	371	0.0341244	517	0.0475533	888	0.0816777
PANCAN	12q	amp	1	0	0.58104	-0.78329	0.58104	-0.78329	5.72681	2.51773	93937781	5702459	13.14	1266	0.116446	754	0.0693525	405	0.0372517	1159	0.106604
PANCAN	16p	amp	1	0	1	0	1	0	11.0268	3.46294	31196841	14657366	11.28	1568	0.144224	376	0.0345843	344	0.0316409	720	0.0662252
PANCAN	16q	amp	1	0	1	0	1	0	6.36775	2.67078	42872272	14657366	11.78	960	0.0883002	429	0.0394592	273	0.0251104	702	0.0645695
PANCAN	17p	amp	1	0	0.215647	-2.21326	0.215647	-2.21326	20.1836	4.33511	20318172	3965125	10.69	568	0.0522443	468	0.0430464	247	0.0227189	715	0.0657653
PANCAN	17q	amp	5.71068	2.51366	0.352473	-1.50442	2.01286	1.00925	7.04265	2.81612	55646500	3965125	10.82	1208	0.111111	339	0.031181	1102	0.101361	1441	0.132542
PANCAN	18p	amp	1	0	1	0	1	0	24.9106	4.63869	14291122	4069040	11.57	1297	0.119297	231	0.0212472	356	0.0327447	587	0.0539919
PANCAN	18q	amp	1	0	0.483788	-1.04755	0.483788	-1.04755	5.40806	2.43511	58419494	4069040	12.24	680	0.062546	689	0.0633738	234	0.0215232	923	0.084897
PANCAN	19p	amp	1	0	0.21747	-2.20111	0.21747	-2.20111	30.1839	4.91571	23768975	4187502	9.82	863	0.0793782	777	0.071468	242	0.022259	1019	0.093727
PANCAN	19q	amp	1	0	0.668906	-0.580125	0.668906	-0.580125	21.4145	4.42052	30637733	4187502	10.38	1254	0.115342	797	0.0733076	504	0.0463576	1301	0.119665
PANCAN	1p	amp	1	0	0.404996	-1.30402	0.404996	-1.30402	8.03599	3.00648	117308752	29352184	14.38	541	0.0497609	1086	0.0998896	546	0.0502208	1632	0.15011
PANCAN	1q	amp	2.09267	1.06534	1	0	2.09267	1.06534	5.15285	2.36537	97934162	29352184	13.24	3024	0.278146	666	0.0612583	581	0.05344	1247	0.114698
PANCAN	20p	amp	1	0	1	0	1	0	11.5375	3.52826	25742136	3646074	12.76	2868	0.263797	618	0.0568433	297	0.0273179	915	0.0841611
PANCAN	20q	amp	1.68389	0.751794	1	0	1.68389	0.751794	12.2194	3.6111	32375865	3646074	10.18	3468	0.318985	446	0.0410228	566	0.0520603	1012	0.0930831
PANCAN	2p	amp	1.59033	0.669324	1	0	1.59033	0.669324	5.06474	2.34049	88646532	6210947	12.74	1235	0.113595	384	0.0353201	538	0.0494849	922	0.084805
PANCAN	2q	amp	1	0	1	0	1	0	2.1341	1.09363	147134363	6210947	10.55	707	0.0650294	854	0.0785504	314	0.0288815	1168	0.107432
PANCAN	3p	amp	1	0	0.341989	-1.54798	0.341989	-1.54798	7.65806	2.93698	88273392	3248709	14.46	720	0.0662252	742	0.0682487	484	0.044518	1226	0.112767
PANCAN	3q	amp	4.3428	2.11863	1	0	4.3428	2.11863	3.6907	1.8839	103804007	3248709	13	1977	0.181843	286	0.0263061	1218	0.112031	1504	0.138337
PANCAN	4p	amp	1	0	0.387227	-1.36875	0.387227	-1.36875	12.6933	3.666	47014893	4629931	13.32	659	0.0606144	333	0.0306291	364	0.0334805	697	0.0641096
PANCAN	4q	amp	1	0	0.298211	-1.74559	0.298211	-1.74559	3.02911	1.59889	136064895	4629931	14.02	397	0.0365158	656	0.0603385	259	0.0238227	915	0.0841611
PANCAN	5p	amp	14.2913	3.83707	0.237034	-2.07684	3.38752	1.76023	5.49635	2.45847	44464224	4746400	12.74	2624	0.241354	238	0.0218911	655	0.0602465	893	0.0821376
PANCAN	5q	amp	1	0	0.197888	-2.33725	0.197888	-2.33725	6.50735	2.70207	130235614	4746400	13.13	899	0.0826895	624	0.0573951	710	0.0653054	1334	0.122701
PANCAN	6p	amp	1.74894	0.806479	1	0	1.74894	0.806479	8.6665	3.11545	56192205	5028048	11.53	1368	0.125828	531	0.0488411	678	0.062362	1209	0.111203
PANCAN	6q	amp	1	0	0.459349	-1.12234	0.459349	-1.12234	3.86615	1.9509	108669387	5028048	13.53	615	0.0565673	911	0.0837932	328	0.0301692	1239	0.113962
PANCAN	7p	amp	5.5488	2.47218	1	0	5.5488	2.47218	7.78598	2.96088	57230627	5176355	12.57	3365	0.309511	484	0.044518	563	0.0517844	1047	0.0963024
PANCAN	7q	amp	1.6727	0.742177	1	0	1.6727	0.742177	4.88027	2.28696	95272854	5176355	14	2963	0.272535	807	0.0742274	563	0.0517844	1370	0.126012
PANCAN	8p	amp	1	0	0.131412	-2.92783	0.131412	-2.92783	14.5469	3.86264	42315706	4527573	12.87	1265	0.116354	1514	0.139257	237	0.0217991	1751	0.161056
PANCAN	8q	amp	7.39402	2.88636	1	0	7.39402	2.88636	2.99593	1.583	97771552	4527573	13.55	3216	0.295806	383	0.0352281	1263	0.11617	1646	0.151398
PANCAN	9p	amp	1	0	1	0	1	0	10.7488	3.4261	37957757	32291356	11.62	847	0.0779065	389	0.03578	408	0.0375276	797	0.0733076
PANCAN	9q	amp	1	0	0.441365	-1.17996	0.441365	-1.17996	10.742	3.42519	69899709	32291356	11.83	904	0.0831494	284	0.0261221	511	0.0470015	795	0.0731236
PANCAN	13	del	2.68869	1.4269	0.372899	-1.42314	1.00261	0.0037576	8.41316	3.07265	95536653	19450805	13.82	2076	0.190949	938	0.0862767	513	0.0471854	1451	0.133462
PANCAN	14	del	2.10006	1.07043	0.612781	-0.706556	1.28688	0.363877	7.55948	2.91829	85486671	20501367	13.29	1561	0.14358	475	0.0436902	813	0.0747792	1288	0.118469
PANCAN	15	del	1	0	1	0	1	0	4.61657	2.20682	78196623	23687684	12.52	1513	0.139165	833	0.0766188	361	0.0332046	1194	0.109823
PANCAN	21	del	1	0	0.658584	-0.602561	0.658584	-0.602561	19.788	4.30655	32331154	15347620	10.87	1704	0.156733	419	0.0385394	507	0.0466336	926	0.0851729
PANCAN	22	del	1.62152	0.697344	0.269133	-1.89361	0.436403	-1.19627	31.6677	4.98494	31907083	17423929	11.19	2232	0.205298	341	0.031365	924	0.084989	1265	0.116354
PANCAN	10p	del	1	0	0.557891	-0.841946	0.557891	-0.841946	24.038	4.58725	38648761	3883970	11.45	1781	0.163815	217	0.0199595	581	0.05344	798	0.0733996
PANCAN	10q	del	2.46126	1.2994	0.592654	-0.754738	1.45867	0.544657	8.31512	3.05574	92277118	3883970	14.04	1943	0.178716	265	0.0243745	1037	0.0953826	1302	0.119757
PANCAN	11p	del	1.81256	0.858028	0.6177	-0.695022	1.11962	0.163006	23.0307	4.52549	49599211	5958468	12.22	1379	0.12684	205	0.0188558	1192	0.109639	1397	0.128495
PANCAN	11q	del	10.3308	3.36888	0.101974	-3.29373	1.05347	0.0751511	11.2898	3.49695	78128733	5958468	14.23	1182	0.10872	263	0.0241906	1452	0.133554	1715	0.157745
PANCAN	12p	del	1.81933	0.863407	0.779356	-0.359646	1.4179	0.503761	10.0822	3.33374	32631206	5702459	10.62	553	0.0508646	177	0.0162804	463	0.0425865	640	0.0588668
PANCAN	12q	del	1.86351	0.898019	0.188005	-2.41116	0.350348	-1.51314	15.0758	3.91417	93937781	5702459	13.14	550	0.0505887	280	0.0257542	786	0.0722958	1066	0.09805
PANCAN	16p	del	1	0	0.417361	-1.26063	0.417361	-1.26063	33.9578	5.08567	31196841	14657366	11.28	900	0.0827815	262	0.0240986	641	0.0589588	903	0.0830574
PANCAN	16q	del	2.06173	1.04385	0.766689	-0.383286	1.5807	0.660567	13.8842	3.79537	42872272	14657366	11.78	2052	0.188742	249	0.0229029	936	0.0860927	1185	0.108996
PANCAN	17p	del	18.9571	4.24466	0.133949	-2.90024	2.53928	1.34442	13.8737	3.79428	20318172	3965125	10.69	2671	0.245677	335	0.0308131	1006	0.0925313	1341	0.123344
PANCAN	17q	del	1	0	0.148035	-2.75599	0.148035	-2.75599	31.1146	4.95952	55646500	3965125	10.82	742	0.0682487	995	0.0915195	487	0.044794	1482	0.136313
PANCAN	18p	del	1	0	1	0	1	0	24.8406	4.63463	14291122	4069040	11.57	1986	0.182671	282	0.0259382	355	0.0326527	637	0.0585909
PANCAN	18q	del	3.04018	1.60416	1	0	3.04018	1.60416	13.8359	3.79034	58419494	4069040	12.24	2008	0.184695	179	0.0164643	1470	0.13521	1649	0.151674
PANCAN	19p	del	3.37688	1.75569	0.250922	-1.99469	0.847335	-0.238996	32.5089	5.02276	23768975	4187502	9.82	1037	0.0953826	203	0.0186718	1436	0.132082	1639	0.150754
PANCAN	19q	del	2.88286	1.5275	0.106159	-3.23571	0.306041	-1.70821	40.2943	5.3325	30637733	4187502	10.38	764	0.0702723	247	0.0227189	880	0.0809419	1127	0.103661
PANCAN	1p	del	25.4666	4.67053	0.0822595	-3.60367	2.09487	1.06686	8.58884	3.10246	117308752	29352184	14.38	1204	0.110743	378	0.0347682	1402	0.128955	1780	0.163723
PANCAN	1q	del	1	0	0.406867	-1.29737	0.406867	-1.29737	5.35638	2.42126	97934162	29352184	13.24	282	0.0259382	82	0.00754231	365	0.0335725	447	0.0411148
PANCAN	20p	del	1.60165	0.679563	1	0	1.60165	0.679563	15.7177	3.97432	25742136	3646074	12.76	475	0.0436902	120	0.0110375	530	0.0487491	650	0.0597866
PANCAN	20q	del	1	0	0.553479	-0.853401	0.553479	-0.853401	9.70543	3.27879	32375865	3646074	10.18	130	0.0119573	110	0.0101177	226	0.0207873	336	0.0309051
PANCAN	2p	del	1	0	0.303963	-1.71803	0.303963	-1.71803	9.13639	3.19162	88646532	6210947	12.74	430	0.0395511	179	0.0164643	470	0.0432303	649	0.0596946
PANCAN	2q	del	1.70344	0.768447	0.143602	-2.79986	0.244616	-2.03141	16.0002	4.00002	147134363	6210947	10.55	457	0.0420346	112	0.0103017	1349	0.12408	1461	0.134382
PANCAN	3p	del	4.7874	2.25924	1	0	4.7874	2.25924	6.34439	2.66548	88273392	3248709	14.46	1682	0.154709	349	0.0321008	1169	0.107524	1518	0.139625
PANCAN	3q	del	1	0	0.130899	-2.93348	0.130899	-2.93348	10.2634	3.35944	103804007	3248709	13	620	0.0570272	538	0.0494849	348	0.0320088	886	0.0814937
PANCAN	4p	del	2.05591	1.03978	1	0	2.05591	1.03978	10.5121	3.39398	47014893	4629931	13.32	1901	0.174853	261	0.0240066	640	0.0588668	901	0.0828734
PANCAN	4q	del	4.77884	2.25666	0.153879	-2.70013	0.735362	-0.443473	10.097	3.33585	136064895	4629931	14.02	1692	0.155629	292	0.026858	1367	0.125736	1659	0.152594
PANCAN	5p	del	1	0	0.343698	-1.54079	0.343698	-1.54079	7.11791	2.83145	44464224	4746400	12.74	558	0.0513245	244	0.022443	213	0.0195916	457	0.0420346
PANCAN	5q	del	7.52308	2.91132	0.604833	-0.725391	4.55021	2.18593	4.14676	2.05198	130235614	4746400	13.13	1443	0.132726	541	0.0497609	705	0.0648455	1246	0.114606
PANCAN	6p	del	1	0	0.384395	-1.37934	0.384395	-1.37934	15.6107	3.96446	56192205	5028048	11.53	816	0.0750552	332	0.0305372	687	0.0631898	1019	0.093727
PANCAN	6q	del	3.28203	1.71459	1	0	3.28203	1.71459	9.78604	3.29072	108669387	5028048	13.53	1214	0.111663	154	0.0141648	1638	0.150662	1792	0.164827
PANCAN	7p	del	1	0	0.525684	-0.927733	0.525684	-0.927733	11.4528	3.51763	57230627	5176355	12.57	291	0.026766	123	0.0113135	467	0.0429544	590	0.0542678
PANCAN	7q	del	1.66705	0.737295	0.267599	-1.90185	0.4461	-1.16456	11.2667	3.494	95272854	5176355	14	302	0.0277778	140	0.0128771	773	0.0711001	913	0.0839772
PANCAN	8p	del	15.7283	3.97529	0.318079	-1.65254	5.00284	2.32275	10.2663	3.35984	42315706	4527573	12.87	1582	0.145511	155	0.0142568	2107	0.193801	2262	0.208057
PANCAN	8q	del	1	0	0.109656	-3.18895	0.109656	-3.18895	9.37865	3.22938	97771552	4527573	13.55	274	0.0252024	507	0.0466336	295	0.0271339	802	0.0737675
PANCAN	9p	del	4.24246	2.0849	0.465088	-1.10443	1.97312	0.980476	10.8183	3.4354	37957757	32291356	11.62	2374	0.218359	327	0.0300773	935	0.0860007	1262	0.116078
PANCAN	9q	del	1	0	0.300567	-1.73424	0.300567	-1.73424	11.6211	3.53868	69899709	32291356	11.83	1927	0.177244	531	0.0488411	414	0.0380795	945	0.0869205

## Sheet: Table S5c
Table S5c
Selection and mechanism scores for all cohorts other than pan-cancer. Log2 scores (in bold) are reflected in figures.
type	arm	direction	selection_score_p	log_selection_score_p	selection_score_n	log_selection_score_n	selection_score_net	log_selection_score_net	telomeric_mechanism_score	log_telomeric_mechanism_score	arm_length	final_segment	centromeric_density	centromeric_mechanism_score_individual	centromeric_mechanism_score	log_centromeric_mechanism_score
ACC	10p	amp	1	0	1	0	1	0	0.0776222	-3.68739	38648761	0.0776222	0	0	1.4849	0.570369
ACC	10p	del	1	0	1	0	1	0	0.206992	-2.27235	38648761	0.206992	0	0	1.4849	0.570369
ACC	10q	amp	1	0	1	0	1	0	0.0758585	-3.72055	92277118	0.0758585	0	0	1.4849	0.570369
ACC	10q	del	1	0	1	0	1	0	0.0433477	-4.5279	92277118	0.0433477	0.257469	5.93961	1.4849	0.570369
ACC	11p	amp	1	0	1	0	1	0	0.0201616	-5.63225	49599211	0.0201616	0.335657	16.6483	4.68234	2.22723
ACC	11p	del	1	0	1	0	1	0	0.0806464	-3.63225	49599211	0.0806464	0.167828	2.08104	4.68234	2.22723
ACC	11q	amp	1	0	1	0	1	0	0.0127994	-6.28778	78128733	0.0127994	0	0	4.68234	2.22723
ACC	11q	del	1	0	1	0	1	0	0.0639969	-3.96585	78128733	0.0639969	0	0	4.68234	2.22723
ACC	12p	amp	1	0	1	0	1	0	0	#NAME?	32631206	0	0.175363	inf	inf	inf
ACC	12p	del	1	0	1	0	1	0	0.061291	-4.02818	32631206	0.061291	0	0	inf	inf
ACC	12q	amp	1	0	1	0	1	0	0.031936	-4.96867	93937781	0.031936	0.350726	10.9821	inf	inf
ACC	12q	del	1	0	1	0	1	0	0.0425814	-4.55363	93937781	0.0425814	0	0	inf	inf
ACC	13	amp	1	0	1	0	1	0	0.0418687	-4.57798	95536653	0.0418687	0.205647	4.91171	147.351	7.20312
ACC	13	del	1	0	1	0	1	0	0.0104672	-6.57798	95536653	0.0104672	3.03329	289.791	147.351	7.20312
ACC	14	amp	1	0	1	0	1	0	0.0467909	-4.41763	85486671	0.0467909	1.02432	21.8915	21.3702	4.41753
ACC	14	del	1	0	1	0	1	0	0.0701864	-3.83267	85486671	0.0701864	1.46332	20.849	21.3702	4.41753
ACC	15	amp	1	0	1	0	1	0	0.0895179	-3.48168	78196623	0.0895179	0.506592	5.65912	38.3169	5.25991
ACC	15	del	1	0	1	0	1	0	0.0255766	-5.28903	78196623	0.0255766	1.81529	70.9747	38.3169	5.25991
ACC	16p	amp	1	0	1	0	1	0	0.0641091	-3.96333	31196841	0.0641091	0.2729	4.25681	2.04594	1.03276
ACC	16p	del	1	0	1	0	1	0	0.0961636	-3.37837	31196841	0.0961636	0.0682251	0.709469	2.04594	1.03276
ACC	16q	amp	1	0	1	0	1	0	0.0466502	-4.42197	42872272	0.0466502	0.0682251	1.46248	2.04594	1.03276
ACC	16q	del	1	0	1	0	1	0	0.116625	-3.10004	42872272	0.116625	0.204675	1.75498	2.04594	1.03276
ACC	17p	amp	1	0	1	0	1	0	0.147651	-2.75974	20318172	0.147651	0	0	0	#NAME?
ACC	17p	del	1	0	1	0	1	0	0.442953	-1.17477	20318172	0.442953	0	0	0	#NAME?
ACC	17q	amp	1	0	1	0	1	0	0.107823	-3.21326	55646500	0.107823	0	0	0	#NAME?
ACC	17q	del	1	0	1	0	1	0	0.0359412	-4.79822	55646500	0.0359412	0	0	0	#NAME?
ACC	18p	amp	1	0	1	0	1	0	0	#NAME?	14291122	0	0		1.17072	0.227397
ACC	18p	del	1	0	1	0	1	0	0.139947	-2.83705	14291122	0.139947	0.491517	3.51216	1.17072	0.227397
ACC	18q	amp	1	0	1	0	1	0	0.0342351	-4.86838	58419494	0.0342351	0	0	1.17072	0.227397
ACC	18q	del	1	0	1	0	1	0	0.0684703	-3.86838	58419494	0.0684703	0	0	1.17072	0.227397
ACC	19p	amp	1	0	1	0	1	0	0.0420717	-4.57101	23768975	0.0420717	0.716418	17.0285	5.79713	2.53534
ACC	19p	del	1	0	1	0	1	0	0.126215	-2.98605	23768975	0.126215	0.238806	1.89206	5.79713	2.53534
ACC	19q	amp	1	0	1	0	1	0	0.0979185	-3.35228	30637733	0.0979185	0.238806	2.43882	5.79713	2.53534
ACC	19q	del	1	0	1	0	1	0	0.130558	-2.93724	30637733	0.130558	0.238806	1.82912	5.79713	2.53534
ACC	1p	amp	1	0	1	0	1	0	0.0340981	-4.87417	117308752	0.0340981	0	0	1.55524	0.637133
ACC	1p	del	1	0	1	0	1	0	0.0937696	-3.41474	117308752	0.0937696	0.374759	3.99659	1.55524	0.637133
ACC	1q	amp	1	0	1	0	1	0	0.0612656	-4.02878	97934162	0.0612656	0.136276	2.22435	1.55524	0.637133
ACC	1q	del	1	0	1	0	1	0	0.0408438	-4.61374	97934162	0.0408438	0	0	1.55524	0.637133
ACC	20p	amp	1	0	1	0	1	0	0	#NAME?	25742136	0	0		inf	inf
ACC	20p	del	1	0	1	0	1	0	0.233081	-2.1011	25742136	0.233081	1.09707	4.70682	inf	inf
ACC	20q	amp	1	0	1	0	1	0	0	#NAME?	32375865	0	0.822803	inf	inf	inf
ACC	20q	del	1	0	1	0	1	0	0.0308872	-5.01685	32375865	0.0308872	0	0	inf	inf
ACC	21	amp	1	0	1	0	1	0	0.0309299	-5.01485	32331154	0.0309299	1.9547	63.1977	40.8152	5.35103
ACC	21	del	1	0	1	0	1	0	0.12372	-3.01485	32331154	0.12372	2.28048	18.4327	40.8152	5.35103
ACC	22	amp	1	0	1	0	1	0	0.031341	-4.9958	31907083	0.031341	0.229569	7.32489	13.5816	3.76358
ACC	22	del	1	0	1	0	1	0	0.188046	-2.41084	31907083	0.188046	3.7305	19.8382	13.5816	3.76358
ACC	2p	amp	1	0	1	0	1	0	0.0225615	-5.46999	88646532	0.0225615	0	0	0.713631	-0.486749
ACC	2p	del	1	0	1	0	1	0	0.0564038	-4.14806	88646532	0.0564038	0.161006	2.85453	0.713631	-0.486749
ACC	2q	amp	1	0	1	0	1	0	0.027186	-5.20099	147134363	0.027186	0	0	0.713631	-0.486749
ACC	2q	del	1	0	1	0	1	0	0.0339825	-4.87906	147134363	0.0339825	0	0	0.713631	-0.486749
ACC	3p	amp	1	0	1	0	1	0	0.0339853	-4.87894	88273392	0.0339853	0	0	11.3185	3.50061
ACC	3p	del	1	0	1	0	1	0	0.0339853	-4.87894	88273392	0.0339853	0.615629	18.1146	11.3185	3.50061
ACC	3q	amp	1	0	1	0	1	0	0.0770683	-3.69772	103804007	0.0770683	0.615629	7.9881	11.3185	3.50061
ACC	3q	del	1	0	1	0	1	0	0.0481677	-4.37579	103804007	0.0481677	0.923444	19.1714	11.3185	3.50061
ACC	4p	amp	1	0	1	0	1	0	0.0212699	-5.55505	47014893	0.0212699	0.215986	10.1546	3.38485	1.75909
ACC	4p	del	1	0	1	0	1	0	0.0638096	-3.97008	47014893	0.0638096	0.215986	3.38485	3.38485	1.75909
ACC	4q	amp	1	0	1	0	1	0	0.00734943	-7.08815	136064895	0.00734943	0	0	3.38485	1.75909
ACC	4q	del	1	0	1	0	1	0	0.102892	-3.2808	136064895	0.102892	0	0	3.38485	1.75909
ACC	5p	amp	1	0	0.0667429	-3.90524	0.0667429	-3.90524	1.04754	0.0670002	44464224	0.0699156	0.632058	9.0403	5.71764	2.51542
ACC	5p	del	1	0	1	0	1	0	0.04498	-4.47457	44464224	0.04498	0.210686	4.684	5.71764	2.51542
ACC	5q	amp	1	0	1	0	1	0	0.0230352	-5.44002	130235614	0.0230352	0.210686	9.14628	5.71764	2.51542
ACC	5q	del	1	0	1	0	1	0	0.00767839	-7.02498	130235614	0.00767839	0	0	5.71764	2.51542
ACC	6p	amp	1	0	1	0	1	0	0	#NAME?	56192205	0	0		5.66045	2.50092
ACC	6p	del	1	0	1	0	1	0	0.0889803	-3.49037	56192205	0.0889803	0	0	5.66045	2.50092
ACC	6q	amp	1	0	1	0	1	0	0.0184044	-5.7638	108669387	0.0184044	0.198884	10.8063	5.66045	2.50092
ACC	6q	del	1	0	1	0	1	0	0.0644156	-3.95645	108669387	0.0644156	0.397769	6.17504	5.66045	2.50092
ACC	7p	amp	1	0	1	0	1	0	0.122312	-3.03136	57230627	0.122312	0	0	9.2027	3.20206
ACC	7p	del	1	0	1	0	1	0	0.0174732	-5.83872	57230627	0.0174732	0	0	9.2027	3.20206
ACC	7q	amp	1	0	1	0	1	0	0.0104962	-6.57399	95272854	0.0104962	0.386372	36.8108	9.2027	3.20206
ACC	7q	del	1	0	1	0	1	0	0.062977	-3.98903	95272854	0.062977	0	0	9.2027	3.20206
ACC	8p	amp	1	0	1	0	1	0	0	#NAME?	42315706	0	0		2.5017	1.32291
ACC	8p	del	1	0	1	0	1	0	0.165423	-2.59577	42315706	0.165423	0.220869	1.33517	2.5017	1.32291
ACC	8q	amp	1	0	1	0	1	0	0.0715955	-3.80399	97771552	0.0715955	0.441738	6.16991	2.5017	1.32291
ACC	8q	del	1	0	1	0	1	0	0.0204558	-5.61134	97771552	0.0204558	0	0	2.5017	1.32291
ACC	9p	amp	1	0	1	0	1	0	0.0526902	-4.24632	37957757	0.0526902	0	0	1.27354	0.348845
ACC	9p	del	1	0	1	0	1	0	0.184416	-2.43897	37957757	0.184416	0.340648	1.84718	1.27354	0.348845
ACC	9q	amp	1	0	1	0	1	0	0.0858373	-3.54225	69899709	0.0858373	0.278712	3.24699	1.27354	0.348845
ACC	9q	del	1	0	1	0	1	0	0.0429186	-4.54225	69899709	0.0429186	0	0	1.27354	0.348845
BLCA	10p	amp	1	0	1	0	1	0	1.31958	0.400075	38648761	1.31958	7.98153	6.04855	3.82735	1.93635
BLCA	10p	del	1	0	1	0	1	0	0.310489	-1.68739	38648761	0.310489	1.02987	3.31695	3.82735	1.93635
BLCA	10q	amp	1	0	1	0	1	0	0.151717	-2.72055	92277118	0.151717	0	0	3.82735	1.93635
BLCA	10q	del	2.774	1.47197	1	0	2.774	1.47197	0.327918	-1.60859	92277118	0.909646	5.40684	5.94389	3.82735	1.93635
BLCA	11p	amp	1	0	1	0	1	0	0.0806464	-3.63225	49599211	0.0806464	0.167828	2.08104	3.56881	1.83544
BLCA	11p	del	2.31115	1.20861	1	0	2.31115	1.20861	0.974276	-0.0375977	49599211	2.25169	7.21662	3.20497	3.56881	1.83544
BLCA	11q	amp	1	0	1	0	1	0	0.166392	-2.58734	78128733	0.166392	1.34263	8.06906	3.56881	1.83544
BLCA	11q	del	1	0	1	0	1	0	0.729565	-0.454891	78128733	0.729565	0.671314	0.920156	3.56881	1.83544
BLCA	12p	amp	1	0	1	0	1	0	0.704847	-0.504618	32631206	0.704847	2.98117	4.22953	3.74147	1.9036
BLCA	12p	del	1	0	1	0	1	0	0.429037	-1.22083	32631206	0.429037	1.22754	2.86115	3.74147	1.9036
BLCA	12q	amp	1	0	1	0	1	0	0.287424	-1.79875	93937781	0.287424	0.526089	1.83036	3.74147	1.9036
BLCA	12q	del	1	0	0.228785	-2.12794	0.228785	-2.12794	0.887614	-0.171995	93937781	0.203073	1.22754	6.04483	3.74147	1.9036
BLCA	13	amp	1	0	1	0	1	0	0.554761	-0.850062	95536653	0.554761	2.31353	4.17032	6.07592	2.6031
BLCA	13	del	1	0	1	0	1	0	0.167475	-2.57798	95536653	0.167475	1.33671	7.98152	6.07592	2.6031
BLCA	14	amp	1	0	1	0	1	0	0.280746	-1.83267	85486671	0.280746	1.17065	4.1698	5.52217	2.46524
BLCA	14	del	1	0	1	0	1	0	0.432816	-1.20817	85486671	0.432816	2.97541	6.87454	5.52217	2.46524
BLCA	15	amp	1	0	1	0	1	0	0.191824	-2.38214	78196623	0.191824	0.591024	3.08107	5.60803	2.48749
BLCA	15	del	1	0	1	0	1	0	0.358072	-1.48168	78196623	0.358072	2.91291	8.13498	5.60803	2.48749
BLCA	16p	amp	1	0	1	0	1	0	0.192327	-2.37837	31196841	0.192327	0.13645	0.709469	1.14976	0.201338
BLCA	16p	del	3.41516	1.77195	0.207917	-2.26592	0.710069	-0.49397	2.03337	1.02387	31196841	1.44383	0.545801	0.378022	1.14976	0.201338
BLCA	16q	amp	1	0	1	0	1	0	0.606453	-0.721533	42872272	0.606453	0.545801	0.899989	1.14976	0.201338
BLCA	16q	del	1	0	1	0	1	0	0.653103	-0.614618	42872272	0.653103	1.70563	2.61158	1.14976	0.201338
BLCA	17p	amp	1	0	1	0	1	0	0.442953	-1.17477	20318172	0.442953	0.252199	0.569358	3.27709	1.71241
BLCA	17p	del	7.60949	2.9278	1	0	7.60949	2.9278	0.939888	-0.0894395	20318172	7.15207	19.4193	2.7152	3.27709	1.71241
BLCA	17q	amp	1	0	1	0	1	0	1.07823	0.108672	55646500	1.07823	10.5924	9.82379	3.27709	1.71241
BLCA	17q	del	1	0	1	0	1	0	0.143765	-2.79822	55646500	0.143765	0	0	3.27709	1.71241
BLCA	18p	amp	1	0	1	0	1	0	1.74934	0.806809	14291122	1.74934	4.66941	2.66924	2.32516	1.21733
BLCA	18p	del	1	0	1	0	1	0	0.699735	-0.515119	14291122	0.699735	1.96607	2.80973	2.32516	1.21733
BLCA	18q	amp	1	0	1	0	1	0	0.102705	-3.28342	58419494	0.102705	0.245758	2.39285	2.32516	1.21733
BLCA	18q	del	2.58296	1.36903	1	0	2.58296	1.36903	0.865685	-0.208085	58419494	2.23603	3.19486	1.42881	2.32516	1.21733
BLCA	19p	amp	1	0	1	0	1	0	0.336573	-1.57101	23768975	0.336573	0.238806	0.709521	2.48814	1.31506
BLCA	19p	del	1	0	1	0	1	0	2.01944	1.01395	23768975	2.01944	5.25373	2.60158	2.48814	1.31506
BLCA	19q	amp	1	0	1	0	1	0	1.04446	0.0627624	30637733	1.04446	6.20895	5.94463	2.48814	1.31506
BLCA	19q	del	1	0	1	0	1	0	0.685429	-0.54492	30637733	0.685429	0.477612	0.696807	2.48814	1.31506
BLCA	1p	amp	1	0	1	0	1	0	0.26426	-1.91997	117308752	0.26426	0.170345	0.644612	1.71098	0.774822
BLCA	1p	del	1	0	0.405725	-1.30143	0.405725	-1.30143	0.527304	-0.923292	117308752	0.21394	0.272552	1.27396	1.71098	0.774822
BLCA	1q	amp	1	0	1	0	1	0	0.285906	-1.80639	97934162	0.285906	1.36276	4.76646	1.71098	0.774822
BLCA	1q	del	1	0	1	0	1	0	0.21443	-2.22142	97934162	0.21443	0.034069	0.158882	1.71098	0.774822
BLCA	20p	amp	1	0	1	0	1	0	0.505009	-0.98562	25742136	0.505009	0.822803	1.62929	6.57551	2.7171
BLCA	20p	del	1	0	1	0	1	0	0.543855	-0.878705	25742136	0.543855	3.01694	5.54733	6.57551	2.7171
BLCA	20q	amp	1	0	1	0	1	0	0.401534	-1.31641	32375865	0.401534	7.6795	19.1254	6.57551	2.7171
BLCA	20q	del	1	0	1	0	1	0	0.463308	-1.10996	32375865	0.463308	0	0	6.57551	2.7171
BLCA	21	amp	1	0	1	0	1	0	0.680458	-0.555421	32331154	0.680458	4.69128	6.8943	4.74351	2.24596
BLCA	21	del	1	0	1	0	1	0	0.804178	-0.314413	32331154	0.804178	2.08501	2.59273	4.74351	2.24596
BLCA	22	amp	1	0	1	0	1	0	0.031341	-4.9958	31907083	0.031341	1.32002	42.1181	22.0024	4.45959
BLCA	22	del	1	0	1	0	1	0	2.06851	1.04859	31907083	2.06851	3.90268	1.88671	22.0024	4.45959
BLCA	2p	amp	1	0	1	0	1	0	0.518915	-0.94643	88646532	0.518915	2.89811	5.58494	2.78173	1.47598
BLCA	2p	del	1	0	1	0	1	0	0.101527	-3.30007	88646532	0.101527	0	0	2.78173	1.47598
BLCA	2q	amp	1	0	1	0	1	0	0.0203895	-5.61603	147134363	0.0203895	0	0	2.78173	1.47598
BLCA	2q	del	2.42749	1.27947	0.20781	-2.26667	0.504456	-0.9872	0.979044	-0.0305537	147134363	0.493885	2.7371	5.54199	2.78173	1.47598
BLCA	3p	amp	1	0	1	0	1	0	0.634393	-0.656552	88273392	0.634393	0.307815	0.485212	6.03109	2.59242
BLCA	3p	del	4.13414	2.04759	1	0	4.13414	2.04759	0.171937	-2.54004	88273392	0.710813	4.00159	5.6296	6.03109	2.59242
BLCA	3q	amp	1	0	1	0	1	0	0.529845	-0.916359	103804007	0.529845	9.54225	18.0095	6.03109	2.59242
BLCA	3q	del	1	0	1	0	1	0	0.0481677	-4.37579	103804007	0.0481677	0	0	6.03109	2.59242
BLCA	4p	amp	1	0	1	0	1	0	0.467937	-1.09561	47014893	0.467937	0.863944	1.84628	1.33973	0.421946
BLCA	4p	del	1	0	1	0	1	0	0.723175	-0.467583	47014893	0.723175	1.5119	2.09064	1.33973	0.421946
BLCA	4q	amp	1	0	1	0	1	0	0.0881932	-3.50319	136064895	0.0881932	0	0	1.33973	0.421946
BLCA	4q	del	1	0	1	0	1	0	0.455665	-1.13395	136064895	0.455665	0.647958	1.42201	1.33973	0.421946
BLCA	5p	amp	1	0	1	0	1	0	0.83213	-0.26512	44464224	0.83213	20.0152	24.053	8.24998	3.04439
BLCA	5p	del	1	0	1	0	1	0	0.2249	-2.15265	44464224	0.2249	0.210686	0.936799	8.24998	3.04439
BLCA	5q	amp	1	0	1	0	1	0	0.0691055	-3.85506	130235614	0.0691055	0	0	8.24998	3.04439
BLCA	5q	del	7.06758	2.82122	1	0	7.06758	2.82122	0.2419	-2.04752	130235614	1.70965	13.6946	8.01019	8.24998	3.04439
BLCA	6p	amp	1	0	1	0	1	0	0.67625	-0.564371	56192205	0.67625	1.98884	2.94099	2.00966	1.00695
BLCA	6p	del	1	0	0.0612397	-4.02939	0.0612397	-4.02939	3.87184	1.95302	56192205	0.23711	0.198884	0.838784	2.00966	1.00695
BLCA	6q	amp	1	0	1	0	1	0	0.128831	-2.95645	108669387	0.128831	0.198884	1.54376	2.00966	1.00695
BLCA	6q	del	2.46683	1.30266	1	0	2.46683	1.30266	0.534498	-0.903743	108669387	1.31852	3.57992	2.71511	2.00966	1.00695
BLCA	7p	amp	1	0	1	0	1	0	0.541668	-0.884519	57230627	0.541668	0.772745	1.4266	2.77933	1.47474
BLCA	7p	del	1	0	1	0	1	0	0.244624	-2.03136	57230627	0.244624	0	0	2.77933	1.47474
BLCA	7q	amp	1	0	1	0	1	0	0.167939	-2.57399	95272854	0.167939	1.15912	6.90202	2.77933	1.47474
BLCA	7q	del	1	0	1	0	1	0	0.346374	-1.5296	95272854	0.346374	0.965931	2.7887	2.77933	1.47474
BLCA	8p	amp	1	0	1	0	1	0	0.141791	-2.81816	42315706	0.141791	0	0	4.09803	2.03493
BLCA	8p	del	10.1708	3.34636	1	0	10.1708	3.34636	0.643781	-0.635359	42315706	6.54774	10.8226	1.65287	4.09803	2.03493
BLCA	8q	amp	1	0	1	0	1	0	0.644359	-0.634063	97771552	0.644359	9.49736	14.7392	4.09803	2.03493
BLCA	8q	del	1	0	1	0	1	0	0.102279	-3.28941	97771552	0.102279	0	0	4.09803	2.03493
BLCA	9p	amp	1	0	1	0	1	0	0.658627	-0.602467	37957757	0.658627	0.588393	0.893363	1.72548	0.786994
BLCA	9p	del	1.61894	0.695052	1	0	1.61894	0.695052	0.770215	-0.376668	37957757	1.24693	0.557425	0.447037	1.72548	0.786994
BLCA	9q	amp	1	0	1	0	1	0	0.214593	-2.22032	69899709	0.214593	0.371616	1.73173	1.72548	0.786994
BLCA	9q	del	1	0	1	0	1	0	0.185981	-2.42677	69899709	0.185981	0.712265	3.82978	1.72548	0.786994
BRCA	10p	amp	1	0	1	0	1	0	2.40629	1.26681	38648761	2.40629	11.5861	4.81492	3.04933	1.60849
BRCA	10p	del	1	0	1	0	1	0	0.879718	-0.184887	38648761	0.879718	0.257469	0.292672	3.04933	1.60849
BRCA	10q	amp	1	0	0.385865	-1.37383	0.385865	-1.37383	0.890755	-0.166899	92277118	0.343711	0.772406	2.24725	3.04933	1.60849
BRCA	10q	del	1	0	1	0	1	0	1.7014	0.76672	92277118	1.7014	8.23899	4.84249	3.04933	1.60849
BRCA	11p	amp	1	0	1	0	1	0	0.705656	-0.502962	49599211	0.705656	4.36354	6.18366	3.18385	1.67077
BRCA	11p	del	1.9149	0.937268	0.350452	-1.51271	0.671079	-0.575445	3.66673	1.87449	49599211	2.46067	4.86702	1.97793	3.18385	1.67077
BRCA	11q	amp	1	0	0.567558	-0.81716	0.567558	-0.81716	0.844654	-0.243567	78128733	0.47939	0.503485	1.05026	3.18385	1.67077
BRCA	11q	del	7.66448	2.93819	0.330072	-1.59915	2.52983	1.33904	0.997862	-0.00308718	78128733	2.52442	8.89491	3.52354	3.18385	1.67077
BRCA	12p	amp	1	0	1	0	1	0	2.3597	1.23861	32631206	2.3597	5.43625	2.30379	2.06266	1.04451
BRCA	12p	del	1	0	1	0	1	0	2.05325	1.03791	32631206	2.05325	2.45508	1.19571	2.06266	1.04451
BRCA	12q	amp	1	0	1	0	1	0	0.489686	-1.03007	93937781	0.489686	1.4029	2.86491	2.06266	1.04451
BRCA	12q	del	1	0	1	0	1	0	1.39454	0.479789	93937781	1.39454	2.63044	1.88625	2.06266	1.04451
BRCA	13	amp	1	0	0.226427	-2.14288	0.226427	-2.14288	1.31686	0.397103	95536653	0.298172	2.72482	9.13841	8.93841	3.16002
BRCA	13	del	5.07271	2.34276	1	0	5.07271	2.34276	0.342147	-1.54731	95536653	1.73561	15.1665	8.7384	8.93841	3.16002
BRCA	14	amp	1	0	1	0	1	0	0.690166	-0.534985	85486671	0.690166	4.2924	6.21937	7.11182	2.83022
BRCA	14	del	2.64073	1.40094	0.418064	-1.2582	1.10399	0.142732	0.960458	-0.0582063	85486671	1.06034	8.48724	8.00427	7.11182	2.83022
BRCA	15	amp	1.75251	0.809422	0.356795	-1.48683	0.625286	-0.677412	1.24333	0.31421	78196623	0.777437	2.23745	2.87798	7.65292	2.93601
BRCA	15	del	1	0	1	0	1	0	0.652202	-0.616609	78196623	0.652202	8.10548	12.4279	7.65292	2.93601
BRCA	16p	amp	1	0	1	0	1	0	2.27587	1.18642	31196841	2.27587	22.0367	9.68275	3.80302	1.92715
BRCA	16p	del	1	0	0.250825	-1.99525	0.250825	-1.99525	2.28074	1.1895	31196841	0.572065	0.13645	0.238522	3.80302	1.92715
BRCA	16q	amp	1	0	1	0	1	0	1.07295	0.101589	42872272	1.07295	0.2729	0.254345	3.80302	1.92715
BRCA	16q	del	1.8445	0.883227	1	0	1.8445	0.883227	3.09922	1.63191	42872272	5.7165	28.791	5.03647	3.80302	1.92715
BRCA	17p	amp	1	0	0.615421	-0.700354	0.615421	-0.700354	2.23892	1.1628	20318172	1.37788	0.252199	0.183034	2.00821	1.00591
BRCA	17p	del	6.48413	2.69691	1	0	6.48413	2.69691	3.07562	1.62088	20318172	19.9427	38.3342	1.92222	2.00821	1.00591
BRCA	17q	amp	3.04628	1.60705	1	0	3.04628	1.60705	1.40695	0.492566	55646500	4.28596	16.6451	3.88364	2.00821	1.00591
BRCA	17q	del	1	0	0.317877	-1.65346	0.317877	-1.65346	2.71713	1.44208	55646500	0.863713	1.76539	2.04396	2.00821	1.00591
BRCA	18p	amp	1	0	1	0	1	0	1.81931	0.863392	14291122	1.81931	4.66941	2.56658	2.41134	1.26983
BRCA	18p	del	1	0	1	0	1	0	3.91852	1.97031	14291122	3.91852	8.11002	2.06967	2.41134	1.26983
BRCA	18q	amp	1	0	1	0	1	0	0.684703	-0.54645	58419494	0.684703	2.21182	3.23034	2.41134	1.26983
BRCA	18q	del	1	0	1	0	1	0	1.93429	0.951801	58419494	1.93429	3.44062	1.77875	2.41134	1.26983
BRCA	19p	amp	1	0	0.232573	-2.10425	0.232573	-2.10425	1.79438	0.843486	23768975	0.417324	1.91045	4.57785	2.48138	1.31114
BRCA	19p	del	3.44196	1.78323	0.317003	-1.65743	1.09111	0.125801	4.33911	2.1174	23768975	4.73446	10.0298	2.11848	2.48138	1.31114
BRCA	19q	amp	1	0	1	0	1	0	2.6438	1.40261	30637733	2.6438	6.92537	2.61948	2.48138	1.31114
BRCA	19q	del	1	0	1	0	1	0	2.74172	1.45508	30637733	2.74172	1.67164	0.609706	2.48138	1.31114
BRCA	1p	amp	1	0	0.369352	-1.43693	0.369352	-1.43693	0.602569	-0.730802	117308752	0.22256	0.068138	0.306156	2.77285	1.47137
BRCA	1p	del	8.34006	3.06006	0.12744	-2.97211	1.06285	0.0879441	2.54357	1.34685	117308752	2.70344	3.8498	1.42404	2.77285	1.47137
BRCA	1q	amp	2.65153	1.40683	1	0	2.65153	1.40683	0.634691	-0.655873	97934162	1.6829	14.5815	8.66452	2.77285	1.47137
BRCA	1q	del	1	0	0.0909801	-3.45831	0.0909801	-3.45831	0.537486	-0.895701	97934162	0.0489005	0.034069	0.696701	2.77285	1.47137
BRCA	20p	amp	1	0	1	0	1	0	1.55387	0.635868	25742136	1.55387	3.56548	2.29458	1.85892	0.894468
BRCA	20p	del	1	0	1	0	1	0	3.34083	1.7402	25742136	3.34083	8.22803	2.46287	1.85892	0.894468
BRCA	20q	amp	2.29789	1.20031	1	0	2.29789	1.20031	2.45933	1.29827	32375865	5.65129	10.1479	1.79568	1.85892	0.894468
BRCA	20q	del	1	0	0.414449	-1.27073	0.414449	-1.27073	1.49963	0.58461	32375865	0.621521	0.548535	0.882569	1.85892	0.894468
BRCA	21	amp	1	0	1	0	1	0	2.41253	1.27055	32331154	2.41253	9.31741	3.86208	4.97706	2.31529
BRCA	21	del	1	0	1	0	1	0	1.14441	0.1946	32331154	1.14441	6.97177	6.09203	4.97706	2.31529
BRCA	22	amp	1	0	0.453947	-1.1394	0.453947	-1.1394	2.47474	1.30728	31907083	1.1234	2.75483	2.45222	5.28569	2.40209
BRCA	22	del	1	0	1	0	1	0	2.6013	1.37923	31907083	2.6013	21.1204	8.11915	5.28569	2.40209
BRCA	2p	amp	1	0	1	0	1	0	0.518915	-0.94643	88646532	0.518915	3.22012	6.20549	3.14479	1.65296
BRCA	2p	del	3.80876	1.92932	0.484346	-1.04589	1.84476	0.88343	0.304307	-1.7164	88646532	0.561373	0.322012	0.573616	3.14479	1.65296
BRCA	2q	amp	1	0	1	0	1	0	0.176709	-2.50055	147134363	0.176709	0.483018	2.73341	3.14479	1.65296
BRCA	2q	del	1	0	0.400076	-1.32165	0.400076	-1.32165	2.0997	1.07018	147134363	0.840039	2.5761	3.06664	3.14479	1.65296
BRCA	3p	amp	1	0	0.207689	-2.2675	0.207689	-2.2675	1.83494	0.875733	88273392	0.381098	0.923444	2.42312	3.91047	1.96734
BRCA	3p	del	3.16905	1.66405	1	0	3.16905	1.66405	0.622868	-0.683001	88273392	1.9739	10.1579	5.1461	3.91047	1.96734
BRCA	3q	amp	2.21794	1.14922	1	0	2.21794	1.14922	0.722059	-0.469811	103804007	1.60148	12.9282	8.07264	3.91047	1.96734
BRCA	3q	del	1	0	0.238933	-2.06532	0.238933	-2.06532	0.647738	-0.626518	103804007	0.154766	0	0	3.91047	1.96734
BRCA	4p	amp	1	0	1	0	1	0	0.723175	-0.467583	47014893	0.723175	0.647958	0.89599	3.95278	1.98287
BRCA	4p	del	3.47217	1.79584	1	0	3.47217	1.79584	0.872605	-0.196599	47014893	3.02984	8.42345	2.78017	3.95278	1.98287
BRCA	4q	amp	1	0	0.204411	-2.29046	0.204411	-2.29046	0.546498	-0.871713	136064895	0.11171	1.07993	9.66727	3.95278	1.98287
BRCA	4q	del	1	0	1	0	1	0	0.962776	-0.0547281	136064895	0.962776	2.37585	2.4677	3.95278	1.98287
BRCA	5p	amp	1	0	1	0	1	0	1.77671	0.829208	44464224	1.77671	19.1724	10.791	6.35714	2.66838
BRCA	5p	del	1	0	1	0	1	0	0.58474	-0.774133	44464224	0.58474	1.26412	2.16184	6.35714	2.66838
BRCA	5q	amp	1	0	0.358865	-1.47849	0.358865	-1.47849	0.938173	-0.0920736	130235614	0.336678	0.632058	1.87734	6.35714	2.66838
BRCA	5q	del	5.77769	2.53049	1	0	5.77769	2.53049	0.233964	-2.09564	130235614	1.35177	14.3267	10.5984	6.35714	2.66838
BRCA	6p	amp	1	0	1	0	1	0	1.3525	0.435629	56192205	1.3525	3.38103	2.49984	1.90401	0.929041
BRCA	6p	del	1	0	0.238611	-2.06727	0.238611	-2.06727	4.15694	2.05552	56192205	0.991892	0.397769	0.40102	1.90401	0.929041
BRCA	6q	amp	1	0	1	0	1	0	0.469313	-1.09138	108669387	0.469313	1.19331	2.54266	1.90401	0.929041
BRCA	6q	del	2.46954	1.30424	1	0	2.46954	1.30424	1.37159	0.455846	108669387	3.38719	7.35872	2.17252	1.90401	0.929041
BRCA	7p	amp	1	0	1	0	1	0	1.13576	0.183652	57230627	1.13576	1.15912	1.02057	2.07378	1.05226
BRCA	7p	del	1	0	1	0	1	0	1.27554	0.351109	57230627	1.27554	1.15912	0.908726	2.07378	1.05226
BRCA	7q	amp	1	0	1	0	1	0	0.703243	-0.507904	95272854	0.703243	1.73868	2.47237	2.07378	1.05226
BRCA	7q	del	1	0	1	0	1	0	1.0916	0.126446	95272854	1.0916	4.2501	3.89345	2.07378	1.05226
BRCA	8p	amp	1	0	1	0	1	0	0.519902	-0.94369	42315706	0.519902	0.220869	0.424828	4.23976	2.08398
BRCA	8p	del	34.2755	5.0991	0.441453	-1.17967	15.131	3.91944	0.763328	-0.389624	42315706	11.5499	24.9582	2.1609	4.23976	2.08398
BRCA	8q	amp	4.39887	2.13713	1	0	4.39887	2.13713	0.671263	-0.575051	97771552	2.9528	26.946	9.12558	4.23976	2.08398
BRCA	8q	del	1	0	0.07132	-3.80955	0.07132	-3.80955	1.18027	0.239119	97771552	0.0841771	0.441738	5.24772	4.23976	2.08398
BRCA	9p	amp	1	0	1	0	1	0	1.52801	0.611658	37957757	1.52801	1.4555	0.952542	1.38637	0.471309
BRCA	9p	del	2.48314	1.31217	1	0	2.48314	1.31217	1.28846	0.365643	37957757	3.19942	1.42453	0.445246	1.38637	0.471309
BRCA	9q	amp	1	0	1	0	1	0	0.815454	-0.294325	69899709	0.815454	0.619361	0.759529	1.38637	0.471309
BRCA	9q	del	1	0	0.359664	-1.47528	0.359664	-1.47528	1.16899	0.225266	69899709	0.420445	1.42453	3.38815	1.38637	0.471309
BRCABAS	10p	amp	1	0	1	0	1	0	0.646851	-0.628494	38648761	0.646851	2.83215	4.37837	2.23614	1.16101
BRCABAS	10p	del	1	0	1	0	1	0	0.0258741	-5.27235	38648761	0.0258741	0	0	2.23614	1.16101
BRCABAS	10q	amp	1	0	1	0	1	0	0.0975323	-3.35798	92277118	0.0975323	0.257469	2.63983	2.23614	1.16101
BRCABAS	10q	del	1	0	1	0	1	0	0.400966	-1.31845	92277118	0.400966	0.772406	1.92636	2.23614	1.16101
BRCABAS	11p	amp	1	0	1	0	1	0	0.0806464	-3.63225	49599211	0.0806464	0.167828	2.08104	0.889756	-0.168518
BRCABAS	11p	del	1	0	1	0	1	0	0.62501	-0.678049	49599211	0.62501	0.503485	0.805564	0.889756	-0.168518
BRCABAS	11q	amp	1	0	1	0	1	0	0.0383982	-4.70282	78128733	0.0383982	0	0	0.889756	-0.168518
BRCABAS	11q	del	1	0	1	0	1	0	0.499176	-1.00238	78128733	0.499176	0.335657	0.672422	0.889756	-0.168518
BRCABAS	12p	amp	1	0	1	0	1	0	0.735492	-0.443218	32631206	0.735492	2.63044	3.57644	1.87109	0.903879
BRCABAS	12p	del	1	0	1	0	1	0	0.0919365	-3.44322	32631206	0.0919365	0.175363	1.90744	1.87109	0.903879
BRCABAS	12q	amp	1	0	1	0	1	0	0.0425814	-4.55363	93937781	0.0425814	0	0	1.87109	0.903879
BRCABAS	12q	del	3.9826	1.99371	1	0	3.9826	1.99371	0.154076	-2.69829	93937781	0.613622	1.22754	2.00048	1.87109	0.903879
BRCABAS	13	amp	1	0	1	0	1	0	0.314016	-1.67109	95536653	0.314016	0.257059	0.818618	5.76753	2.52795
BRCABAS	13	del	1	0	1	0	1	0	0.115139	-3.11855	95536653	0.115139	1.23388	10.7165	5.76753	2.52795
BRCABAS	14	amp	1	0	1	0	1	0	0.0935818	-3.41763	85486671	0.0935818	0.195109	2.0849	6.60219	2.72294
BRCABAS	14	del	1	0	1	0	1	0	0.175466	-2.51074	85486671	0.175466	1.95109	11.1195	6.60219	2.72294
BRCABAS	15	amp	1	0	1	0	1	0	0.268554	-1.89672	78196623	0.268554	0.126648	0.471593	7.30969	2.86981
BRCABAS	15	del	1	0	1	0	1	0	0.0895179	-3.48168	78196623	0.0895179	1.26648	14.1478	7.30969	2.86981
BRCABAS	16p	amp	1	0	1	0	1	0	0.448763	-1.15597	31196841	0.448763	0.409351	0.912175	1.02453	0.0349691
BRCABAS	16p	del	1	0	0.132544	-2.91545	0.132544	-2.91545	0.832912	-0.263765	31196841	0.110398	0.13645	1.23599	1.02453	0.0349691
BRCABAS	16q	amp	1	0	1	0	1	0	0.443177	-1.17405	42872272	0.443177	0	0	1.02453	0.0349691
BRCABAS	16q	del	1	0	1	0	1	0	0.209926	-2.25205	42872272	0.209926	0.409351	1.94998	1.02453	0.0349691
BRCABAS	17p	amp	1	0	1	0	1	0	0.196868	-2.3447	20318172	0.196868	0.252199	1.28106	2.3456	1.22996
BRCABAS	17p	del	1	0	1	0	1	0	0.442953	-1.17477	20318172	0.442953	0.756597	1.70807	2.3456	1.22996
BRCABAS	17q	amp	1	0	1	0	1	0	0.646941	-0.628294	55646500	0.646941	0.504398	0.779666	2.3456	1.22996
BRCABAS	17q	del	1	0	1	0	1	0	0.0898529	-3.47629	55646500	0.0898529	0.504398	5.61359	2.3456	1.22996
BRCABAS	18p	amp	1	0	1	0	1	0	0.209921	-2.25208	14291122	0.209921	1.22879	5.8536	2.31652	1.21196
BRCABAS	18p	del	1	0	1	0	1	0	0.349868	-1.51512	14291122	0.349868	0.737275	2.1073	2.31652	1.21196
BRCABAS	18q	amp	1	0	1	0	1	0	0.0855879	-3.54645	58419494	0.0855879	0	0	2.31652	1.21196
BRCABAS	18q	del	1	0	1	0	1	0	0.376587	-1.40895	58419494	0.376587	0.491517	1.30519	2.31652	1.21196
BRCABAS	19p	amp	1	0	1	0	1	0	0.0420717	-4.57101	23768975	0.0420717	0.238806	5.67617	3.48223	1.80001
BRCABAS	19p	del	1	0	0.231956	-2.10808	0.231956	-2.10808	3.06238	1.61465	23768975	0.710338	2.38806	3.36186	3.48223	1.80001
BRCABAS	19q	amp	1	0	1	0	1	0	0.261116	-1.93724	30637733	0.261116	1.19403	4.57279	3.48223	1.80001
BRCABAS	19q	del	1	0	1	0	1	0	0.750708	-0.413676	30637733	0.750708	0.238806	0.318107	3.48223	1.80001
BRCABAS	1p	amp	1	0	1	0	1	0	0.102294	-3.2892	117308752	0.102294	0.068138	0.666099	1.99944	0.999598
BRCABAS	1p	del	2.31845	1.21316	0.22603	-2.14541	0.524041	-0.932248	0.341642	-1.54944	117308752	0.179034	0.068138	0.380586	1.99944	0.999598
BRCABAS	1q	amp	1	0	1	0	1	0	0.122531	-3.02878	97934162	0.122531	0.851725	6.95108	1.99944	0.999598
BRCABAS	1q	del	1	0	1	0	1	0	0.0204219	-5.61374	97934162	0.0204219	0	0	1.99944	0.999598
BRCABAS	20p	amp	1	0	1	0	1	0	0.194234	-2.36413	25742136	0.194234	0.274268	1.41205	1.07698	0.106993
BRCABAS	20p	del	1	0	1	0	1	0	0.699243	-0.516135	25742136	0.699243	1.37134	1.96118	1.07698	0.106993
BRCABAS	20q	amp	1	0	1	0	1	0	0.586857	-0.768919	32375865	0.586857	0.548535	0.9347	1.07698	0.106993
BRCABAS	20q	del	1	0	1	0	1	0	0.0308872	-5.01685	32375865	0.0308872	0	0	1.07698	0.106993
BRCABAS	21	amp	1	0	1	0	1	0	0.433019	-1.2075	32331154	0.433019	1.56376	3.6113	2.74191	1.45518
BRCABAS	21	del	1	0	1	0	1	0	0.278369	-1.84493	32331154	0.278369	0.521253	1.87253	2.74191	1.45518
BRCABAS	22	amp	1	0	1	0	1	0	0.407433	-1.29537	31907083	0.407433	0.401746	0.986043	4.41707	2.14309
BRCABAS	22	del	1	0	1	0	1	0	0.219387	-2.18845	31907083	0.219387	1.72177	7.84809	4.41707	2.14309
BRCABAS	2p	amp	1	0	1	0	1	0	0.157931	-2.66264	88646532	0.157931	1.44905	9.17526	6.00094	2.58519
BRCABAS	2p	del	1	0	1	0	1	0	0.169211	-2.5631	88646532	0.169211	0	0	6.00094	2.58519
BRCABAS	2q	amp	1	0	1	0	1	0	0.0339825	-4.87906	147134363	0.0339825	0.322012	9.47581	6.00094	2.58519
BRCABAS	2q	del	1	0	0.308172	-1.69819	0.308172	-1.69819	0.488029	-1.03496	147134363	0.150397	0.80503	5.35271	6.00094	2.58519
BRCABAS	3p	amp	1	0	1	0	1	0	0.14727	-2.76347	88273392	0.14727	0.307815	2.09014	5.39036	2.43038
BRCABAS	3p	del	1	0	1	0	1	0	0.226569	-2.14198	88273392	0.226569	2.46252	10.8687	5.39036	2.43038
BRCABAS	3q	amp	1	0	1	0	1	0	0.250472	-1.99728	103804007	0.250472	2.1547	8.60257	5.39036	2.43038
BRCABAS	3q	del	1	0	1	0	1	0	0.0770683	-3.69772	103804007	0.0770683	0	0	5.39036	2.43038
BRCABAS	4p	amp	1	0	1	0	1	0	0.0850794	-3.55505	47014893	0.0850794	0	0	2.65197	1.40707
BRCABAS	4p	del	1	0	1	0	1	0	0.319048	-1.64816	47014893	0.319048	3.0238	9.47759	2.65197	1.40707
BRCABAS	4q	amp	1	0	1	0	1	0	0.0440966	-4.50319	136064895	0.0440966	0	0	2.65197	1.40707
BRCABAS	4q	del	1	0	1	0	1	0	0.191085	-2.38771	136064895	0.191085	0.215986	1.13031	2.65197	1.40707
BRCABAS	5p	amp	1	0	1	0	1	0	0.35984	-1.47457	44464224	0.35984	4.00303	11.1245	6.65801	2.73509
BRCABAS	5p	del	1	0	1	0	1	0	0.17992	-2.47457	44464224	0.17992	0.421372	2.342	6.65801	2.73509
BRCABAS	5q	amp	1	0	1	0	1	0	0.0767839	-3.70305	130235614	0.0767839	0	0	6.65801	2.73509
BRCABAS	5q	del	5.20752	2.3806	1	0	5.20752	2.3806	0.0737524	-3.76117	130235614	0.384067	5.05646	13.1656	6.65801	2.73509
BRCABAS	6p	amp	1	0	1	0	1	0	0.302533	-1.72484	56192205	0.302533	0.596653	1.97219	0.493048	-1.0202
BRCABAS	6p	del	1	0	1	0	1	0	0.302533	-1.72484	56192205	0.302533	0	0	0.493048	-1.0202
BRCABAS	6q	amp	1	0	1	0	1	0	0.08282	-3.59388	108669387	0.08282	0	0	0.493048	-1.0202
BRCABAS	6q	del	1	0	1	0	1	0	0.285269	-1.80961	108669387	0.285269	0	0	0.493048	-1.0202
BRCABAS	7p	amp	1	0	1	0	1	0	0.209678	-2.25375	57230627	0.209678	0.193186	0.921347	2.6107	1.38444
BRCABAS	7p	del	1	0	1	0	1	0	0.262097	-1.93182	57230627	0.262097	0.193186	0.737078	2.6107	1.38444
BRCABAS	7q	amp	1	0	1	0	1	0	0.230916	-2.11456	95272854	0.230916	0.965931	4.18304	2.6107	1.38444
BRCABAS	7q	del	1	0	1	0	1	0	0.0839694	-3.57399	95272854	0.0839694	0.386372	4.60135	2.6107	1.38444
BRCABAS	8p	amp	1	0	1	0	1	0	0.118159	-3.08119	42315706	0.118159	0	0	4.57948	2.19518
BRCABAS	8p	del	8.56819	3.09899	1	0	8.56819	3.09899	0.196892	-2.34452	42315706	1.68701	3.97564	2.35662	4.57948	2.19518
BRCABAS	8q	amp	1	0	1	0	1	0	0.235242	-2.08778	97771552	0.235242	3.75477	15.9613	4.57948	2.19518
BRCABAS	8q	del	1	0	1	0	1	0	0.0306838	-5.02638	97771552	0.0306838	0	0	4.57948	2.19518
BRCABAS	9p	amp	1	0	1	0	1	0	0.711317	-0.491435	37957757	0.711317	0.526457	0.740115	0.651524	-0.61811
BRCABAS	9p	del	1	0	1	0	1	0	0.0790352	-3.66136	37957757	0.0790352	0.0619361	0.783652	0.651524	-0.61811
BRCABAS	9q	amp	1	0	1	0	1	0	0.171675	-2.54225	69899709	0.171675	0	0	0.651524	-0.61811
BRCABAS	9q	del	1	0	1	0	1	0	0.371961	-1.42677	69899709	0.371961	0.402585	1.08233	0.651524	-0.61811
BRCALUM	10p	amp	1	0	1	0	1	0	0.491607	-1.02442	38648761	0.491607	2.31722	4.71356	2.33331	1.22238
BRCALUM	10p	del	1	0	1	0	1	0	0.310489	-1.68739	38648761	0.310489	0	0	2.33331	1.22238
BRCALUM	10q	amp	1	0	1	0	1	0	0.173391	-2.5279	92277118	0.173391	0	0	2.33331	1.22238
BRCALUM	10q	del	1	0	1	0	1	0	0.390129	-1.35798	92277118	0.390129	1.80228	4.6197	2.33331	1.22238
BRCALUM	11p	amp	1	0	1	0	1	0	0.282263	-1.82489	49599211	0.282263	2.3496	8.32416	4.33687	2.11665
BRCALUM	11p	del	1	0	1	0	1	0	0.665333	-0.587851	49599211	0.665333	1.34263	2.01798	4.33687	2.11665
BRCALUM	11q	amp	1	0	1	0	1	0	0.127994	-2.96585	78128733	0.127994	0.335657	2.62244	4.33687	2.11665
BRCALUM	11q	del	10.9397	3.4515	0.342469	-1.54596	3.74649	1.90554	0.235076	-2.0888	78128733	0.88071	3.86005	4.38289	4.33687	2.11665
BRCALUM	12p	amp	1	0	1	0	1	0	0.459683	-1.12129	32631206	0.459683	0.350726	0.762974	1.60244	0.680267
BRCALUM	12p	del	1	0	1	0	1	0	0.674201	-0.568749	32631206	0.674201	1.22754	1.82073	1.60244	0.680267
BRCALUM	12q	amp	1	0	1	0	1	0	0.15968	-2.64674	93937781	0.15968	0.526089	3.29464	1.60244	0.680267
BRCALUM	12q	del	1	0	1	0	1	0	0.330006	-1.59944	93937781	0.330006	0.175363	0.531394	1.60244	0.680267
BRCALUM	13	amp	1	0	1	0	1	0	0.177942	-2.49052	95536653	0.177942	1.13106	6.35633	15.8258	3.98421
BRCALUM	13	del	1	0	1	0	1	0	0.209344	-2.25605	95536653	0.209344	5.29541	25.2953	15.8258	3.98421
BRCALUM	14	amp	1	0	1	0	1	0	0.15207	-2.71719	85486671	0.15207	1.65843	10.9056	8.23269	3.04136
BRCALUM	14	del	1	0	1	0	1	0	0.386025	-1.37323	85486671	0.386025	2.1462	5.55974	8.23269	3.04136
BRCALUM	15	amp	1	0	1	0	1	0	0.37086	-1.43105	78196623	0.37086	0.844321	2.27666	6.91534	2.7898
BRCALUM	15	del	1	0	1	0	1	0	0.204612	-2.28903	78196623	0.204612	2.3641	11.554	6.91534	2.7898
BRCALUM	16p	amp	1	0	1	0	1	0	0.576981	-0.793403	31196841	0.576981	10.4384	18.0915	6.08869	2.60613
BRCALUM	16p	del	1	0	1	0	1	0	0.0641091	-3.96333	31196841	0.0641091	0	0	6.08869	2.60613
BRCALUM	16q	amp	1	0	1	0	1	0	0.139951	-2.83701	42872272	0.139951	0.0682251	0.487494	6.08869	2.60613
BRCALUM	16q	del	1.65926	0.730543	1	0	1.65926	0.730543	1.32413	0.405044	42872272	2.19708	12.6899	5.77579	6.08869	2.60613
BRCALUM	17p	amp	1	0	1	0	1	0	0.196868	-2.3447	20318172	0.196868	0	0	1.67559	0.744671
BRCALUM	17p	del	7.50234	2.90734	1	0	7.50234	2.90734	0.956482	-0.0641903	20318172	7.17585	16.1407	2.24931	1.67559	0.744671
BRCALUM	17q	amp	2.33877	1.22575	1	0	2.33877	1.22575	0.653824	-0.613025	55646500	1.52915	6.80937	4.45306	1.67559	0.744671
BRCALUM	17q	del	1	0	1	0	1	0	0.413323	-1.27466	55646500	0.413323	0	0	1.67559	0.744671
BRCALUM	18p	amp	1	0	1	0	1	0	0.349868	-1.51512	14291122	0.349868	0.737275	2.1073	2.51985	1.33334
BRCALUM	18p	del	1	0	1	0	1	0	1.95926	0.970308	14291122	1.95926	2.9491	1.50521	2.51985	1.33334
BRCALUM	18q	amp	1	0	1	0	1	0	0.273881	-1.86838	58419494	0.273881	1.22879	4.48659	2.51985	1.33334
BRCALUM	18q	del	1	0	1	0	1	0	0.49641	-1.0104	58419494	0.49641	0.983033	1.98029	2.51985	1.33334
BRCALUM	19p	amp	1	0	1	0	1	0	0.210358	-2.24908	23768975	0.210358	0.955224	4.54094	2.07996	1.05656
BRCALUM	19p	del	1	0	1	0	1	0	2.35601	1.23635	23768975	2.35601	2.62687	1.11496	2.07996	1.05656
BRCALUM	19q	amp	1	0	1	0	1	0	0.848627	-0.236798	30637733	0.848627	1.43284	1.68842	2.07996	1.05656
BRCALUM	19q	del	1	0	1	0	1	0	0.489592	-1.03035	30637733	0.489592	0.477612	0.97553	2.07996	1.05656
BRCALUM	1p	amp	1	0	1	0	1	0	0.0426226	-4.55224	117308752	0.0426226	0	0	4.80879	2.26568
BRCALUM	1p	del	1	0	1	0	1	0	0.596716	-0.744884	117308752	0.596716	1.77159	2.9689	4.80879	2.26568
BRCALUM	1q	amp	3.22564	1.68958	1	0	3.22564	1.68958	0.105189	-3.24894	97934162	0.339302	5.51918	16.2663	4.80879	2.26568
BRCALUM	1q	del	1	0	0.0742019	-3.7524	0.0742019	-3.7524	0.219673	-2.18657	97934162	0.0163002	0	0	4.80879	2.26568
BRCALUM	20p	amp	1	0	1	0	1	0	0.427315	-1.22663	25742136	0.427315	1.64561	3.85104	2.06687	1.04745
BRCALUM	20p	del	1	0	1	0	1	0	1.04886	0.0688276	25742136	1.04886	2.19414	2.09192	2.06687	1.04745
BRCALUM	20q	amp	16.5679	4.05032	1	0	16.5679	4.05032	0.121065	-3.04614	32375865	2.0058	4.66255	2.32454	2.06687	1.04745
BRCALUM	20q	del	1	0	1	0	1	0	0.185323	-2.43188	32375865	0.185323	0	0	2.06687	1.04745
BRCALUM	21	amp	1	0	1	0	1	0	0.958828	-0.0606568	32331154	0.958828	1.9547	2.03864	6.58674	2.71956
BRCALUM	21	del	1	0	1	0	1	0	0.216509	-2.2075	32331154	0.216509	2.4108	11.1348	6.58674	2.71956
BRCALUM	22	amp	1	0	1	0	1	0	0.376092	-1.41084	31907083	0.376092	0.516531	1.37342	7.09599	2.827
BRCALUM	22	del	1	0	1	0	1	0	0.658161	-0.603487	31907083	0.658161	8.43667	12.8186	7.09599	2.827
BRCALUM	2p	amp	1	0	1	0	1	0	0.0676845	-3.88503	88646532	0.0676845	0.161006	2.37877	1.79001	0.839967
BRCALUM	2p	del	1	0	1	0	1	0	0.124088	-3.01056	88646532	0.124088	0.161006	1.29751	1.79001	0.839967
BRCALUM	2q	amp	1	0	1	0	1	0	0.0543721	-4.20099	147134363	0.0543721	0	0	1.79001	0.839967
BRCALUM	2q	del	1	0	1	0	1	0	0.231081	-2.11353	147134363	0.231081	0.80503	3.48375	1.79001	0.839967
BRCALUM	3p	amp	1	0	1	0	1	0	0.305868	-1.70902	88273392	0.305868	0.307815	1.00636	6.07088	2.6019
BRCALUM	3p	del	1	0	1	0	1	0	0.158598	-2.65655	88273392	0.158598	2.77033	17.4676	6.07088	2.6019
BRCALUM	3q	amp	1	0	1	0	1	0	0.317907	-1.65332	103804007	0.317907	1.84689	5.80953	6.07088	2.6019
BRCALUM	3q	del	1	0	1	0	1	0	0.105969	-3.23829	103804007	0.105969	0	0	6.07088	2.6019
BRCALUM	4p	amp	1	0	1	0	1	0	0.106349	-3.23312	47014893	0.106349	0.215986	2.03091	inf	inf
BRCALUM	4p	del	1	0	1	0	1	0	0.510477	-0.970083	47014893	0.510477	1.72789	3.38485	inf	inf
BRCALUM	4q	amp	1	0	0	#NAME?	0	#NAME?	0.168148	-2.57219	136064895	0	0.863944	inf	inf	inf
BRCALUM	4q	del	1	0	1	0	1	0	0.242531	-2.04376	136064895	0.242531	1.07993	4.45274	inf	inf
BRCALUM	5p	amp	1	0	1	0	1	0	0.56225	-0.830717	44464224	0.56225	2.9496	5.24608	5.45669	2.44803
BRCALUM	5p	del	1	0	1	0	1	0	0.15743	-2.66722	44464224	0.15743	0	0	5.45669	2.44803
BRCALUM	5q	amp	1	0	1	0	1	0	0.130533	-2.93752	130235614	0.130533	0.210686	1.61405	5.45669	2.44803
BRCALUM	5q	del	1	0	1	0	1	0	0.0844623	-3.56555	130235614	0.0844623	1.26412	14.9666	5.45669	2.44803
BRCALUM	6p	amp	1	0	1	0	1	0	0.213553	-2.22734	56192205	0.213553	0.795538	3.72525	2.37784	1.24965
BRCALUM	6p	del	1	0	0.145451	-2.7814	0.145451	-2.7814	1.419	0.504877	56192205	0.206395	0.198884	0.963612	2.37784	1.24965
BRCALUM	6q	amp	1	0	1	0	1	0	0.16564	-2.59388	108669387	0.16564	0.397769	2.4014	2.37784	1.24965
BRCALUM	6q	del	5.59831	2.48499	1	0	5.59831	2.48499	0.234776	-2.09064	108669387	1.31435	3.18215	2.42108	2.37784	1.24965
BRCALUM	7p	amp	1	0	1	0	1	0	0.262097	-1.93182	57230627	0.262097	0.579559	2.21123	2.03866	1.02762
BRCALUM	7p	del	1	0	1	0	1	0	0.297044	-1.75125	57230627	0.297044	0.193186	0.650363	2.03866	1.02762
BRCALUM	7q	amp	1	0	1	0	1	0	0.188931	-2.40407	95272854	0.188931	0.386372	2.04504	2.03866	1.02762
BRCALUM	7q	del	1	0	1	0	1	0	0.35687	-1.48653	95272854	0.35687	1.15912	3.24801	2.03866	1.02762
BRCALUM	8p	amp	1	0	1	0	1	0	0.189055	-2.40312	42315706	0.189055	0.220869	1.16828	3.15323	1.65683
BRCALUM	8p	del	40.3783	5.33551	0.464402	-1.10655	18.7518	4.22896	0.238039	-2.07073	42315706	4.46364	6.62607	1.48445	3.15323	1.65683
BRCALUM	8q	amp	5.56823	2.47722	1	0	5.56823	2.47722	0.14735	-2.76268	97771552	0.820481	8.17215	9.9602	3.15323	1.65683
BRCALUM	8q	del	1	0	1	0	1	0	0.102279	-3.28941	97771552	0.102279	0	0	3.15323	1.65683
BRCALUM	9p	amp	1	0	1	0	1	0	0.131725	-2.92439	37957757	0.131725	0.123872	0.940382	1.36652	0.450502
BRCALUM	9p	del	2.8238	1.49764	1	0	2.8238	1.49764	0.490411	-1.02794	37957757	1.38482	0.557425	0.402524	1.36652	0.450502
BRCALUM	9q	amp	1	0	1	0	1	0	0.257512	-1.95729	69899709	0.257512	0.185808	0.721552	1.36652	0.450502
BRCALUM	9q	del	1	0	1	0	1	0	0.100143	-3.31986	69899709	0.100143	0.340648	3.4016	1.36652	0.450502
CESC	10p	amp	1	0	1	0	1	0	0.258741	-1.95042	38648761	0.258741	0.772406	2.98525	3.80002	1.92601
CESC	10p	del	1	0	1	0	1	0	0.206992	-2.27235	38648761	0.206992	1.54481	7.46313	3.80002	1.92601
CESC	10q	amp	1	0	1	0	1	0	0.0866954	-3.5279	92277118	0.0866954	0	0	3.80002	1.92601
CESC	10q	del	1	0	1	0	1	0	0.270923	-1.88404	92277118	0.270923	1.28734	4.75169	3.80002	1.92601
CESC	11p	amp	1	0	1	0	1	0	0.0403232	-4.63225	49599211	0.0403232	0.167828	4.16208	2.3949	1.25997
CESC	11p	del	1	0	1	0	1	0	0.725818	-0.46232	49599211	0.725818	2.51743	3.4684	2.3949	1.25997
CESC	11q	amp	1	0	1	0	1	0	0.0383982	-4.70282	78128733	0.0383982	0	0	2.3949	1.25997
CESC	11q	del	4.25479	2.08909	0.231651	-2.10997	0.985627	-0.0208864	0.436801	-1.19495	78128733	0.430523	0.839142	1.94912	2.3949	1.25997
CESC	12p	amp	1	0	1	0	1	0	0.245164	-2.02818	32631206	0.245164	1.57827	6.43759	6.41506	2.68146
CESC	12p	del	1	0	1	0	1	0	0.306455	-1.70625	32631206	0.306455	2.80581	9.15569	6.41506	2.68146
CESC	12q	amp	1	0	1	0	1	0	0.0851628	-3.55363	93937781	0.0851628	0.701452	8.2366	6.41506	2.68146
CESC	12q	del	1	0	1	0	1	0	0.0958081	-3.38371	93937781	0.0958081	0.175363	1.83036	6.41506	2.68146
CESC	13	amp	1	0	1	0	1	0	0.429155	-1.22043	95536653	0.429155	0.462706	1.07818	8.88899	3.15202
CESC	13	del	1	0	1	0	1	0	0.104672	-3.25605	95536653	0.104672	1.748	16.6998	8.88899	3.15202
CESC	14	amp	1	0	1	0	1	0	0.175466	-2.51074	85486671	0.175466	1.26821	7.22766	4.65628	2.21918
CESC	14	del	1	0	1	0	1	0	0.280746	-1.83267	85486671	0.280746	0.585327	2.0849	4.65628	2.21918
CESC	15	amp	1	0	1	0	1	0	0.358072	-1.48168	78196623	0.358072	1.09762	3.06535	5.49406	2.45787
CESC	15	del	1	0	1	0	1	0	0.127883	-2.96711	78196623	0.127883	1.01318	7.92276	5.49406	2.45787
CESC	16p	amp	1	0	1	0	1	0	0.673145	-0.571011	31196841	0.673145	0.409351	0.608116	1.48674	0.572157
CESC	16p	del	1	0	1	0	1	0	0.512872	-0.963328	31196841	0.512872	0.2729	0.532102	1.48674	0.572157
CESC	16q	amp	1	0	1	0	1	0	0.256576	-1.96254	42872272	0.256576	0.13645	0.531812	1.48674	0.572157
CESC	16q	del	1	0	1	0	1	0	0.303226	-1.72153	42872272	0.303226	1.29628	4.27495	1.48674	0.572157
CESC	17p	amp	1	0	1	0	1	0	0.196868	-2.3447	20318172	0.196868	0	0	2.34034	1.22672
CESC	17p	del	5.66496	2.50206	1	0	5.66496	2.50206	0.743069	-0.428431	20318172	4.20946	7.81817	1.85729	2.34034	1.22672
CESC	17q	amp	1	0	1	0	1	0	0.377382	-1.4059	55646500	0.377382	2.26979	6.01457	2.34034	1.22672
CESC	17q	del	1	0	0.147177	-2.76437	0.147177	-2.76437	1.15043	0.202176	55646500	0.169318	0.252199	1.4895	2.34034	1.22672
CESC	18p	amp	1	0	1	0	1	0	0.629762	-0.667122	14291122	0.629762	2.70334	4.29264	2.29304	1.19726
CESC	18p	del	1	0	1	0	1	0	0.559788	-0.837047	14291122	0.559788	1.96607	3.51216	2.29304	1.19726
CESC	18q	amp	1	0	1	0	1	0	0.0855879	-3.54645	58419494	0.0855879	0	0	2.29304	1.19726
CESC	18q	del	1	0	1	0	1	0	0.718938	-0.476061	58419494	0.718938	0.983033	1.36734	2.29304	1.19726
CESC	19p	amp	1	0	1	0	1	0	0.546931	-0.870568	23768975	0.546931	0	0	3.12618	1.6444
CESC	19p	del	1	0	0.559144	-0.838707	0.559144	-0.838707	2.38004	1.25099	23768975	1.33079	6.20895	4.66562	3.12618	1.6444
CESC	19q	amp	1	0	1	0	1	0	0.913906	-0.129883	30637733	0.913906	7.16418	7.83908	3.12618	1.6444
CESC	19q	del	1	0	1	0	1	0	0.359034	-1.47781	30637733	0.359034	0	0	3.12618	1.6444
CESC	1p	amp	1	0	1	0	1	0	0.127868	-2.96728	117308752	0.127868	0	0	3.9369	1.97706
CESC	1p	del	1	0	0.142071	-2.81532	0.142071	-2.81532	0.48232	-1.05194	117308752	0.0685235	0.102207	1.49156	3.9369	1.97706
CESC	1q	amp	1	0	1	0	1	0	0.11232	-3.15431	97934162	0.11232	1.60124	14.256	3.9369	1.97706
CESC	1q	del	1	0	1	0	1	0	0.0408438	-4.61374	97934162	0.0408438	0	0	3.9369	1.97706
CESC	20p	amp	1	0	1	0	1	0	0.310775	-1.68606	25742136	0.310775	0.822803	2.64759	10.4196	3.38122
CESC	20p	del	1	0	1	0	1	0	0.466162	-1.1011	25742136	0.466162	3.01694	6.47188	10.4196	3.38122
CESC	20q	amp	1	0	1	0	1	0	0.185323	-2.43188	32375865	0.185323	6.03389	32.5587	10.4196	3.38122
CESC	20q	del	1	0	1	0	1	0	0.185323	-2.43188	32375865	0.185323	0	0	10.4196	3.38122
CESC	21	amp	1	0	1	0	1	0	0.18558	-2.42989	32331154	0.18558	1.30313	7.02197	5.77962	2.53097
CESC	21	del	1	0	1	0	1	0	0.402089	-1.31441	32331154	0.402089	1.82439	4.53727	5.77962	2.53097
CESC	22	amp	1	0	1	0	1	0	0.282069	-1.82588	31907083	0.282069	0.631316	2.23816	2.45435	1.29534
CESC	22	del	1	0	1	0	1	0	0.752184	-0.410842	31907083	0.752184	2.00873	2.67053	2.45435	1.29534
CESC	2p	amp	1	0	1	0	1	0	0.270738	-1.88503	88646532	0.270738	3.22012	11.8939	4.96892	2.31293
CESC	2p	del	1	0	1	0	1	0	0.0338423	-4.88503	88646532	0.0338423	0	0	4.96892	2.31293
CESC	2q	amp	1	0	1	0	1	0	0.0203895	-5.61603	147134363	0.0203895	0	0	4.96892	2.31293
CESC	2q	del	4.25207	2.08817	0.039791	-4.65142	0.169194	-2.56325	0.715332	-0.483316	147134363	0.12103	0.966036	7.98181	4.96892	2.31293
CESC	3p	amp	1	0	1	0	1	0	0.135941	-2.87894	88273392	0.135941	0.307815	2.26432	17.1196	4.09758
CESC	3p	del	5.55207	2.47302	1	0	5.55207	2.47302	0.118649	-3.07523	88273392	0.658747	18.4689	28.0364	17.1196	4.09758
CESC	3q	amp	26.3239	4.7183	1	0	26.3239	4.7183	0.0505313	-4.30668	103804007	1.33018	28.0111	21.0581	17.1196	4.09758
CESC	3q	del	1	0	1	0	1	0	0	#NAME?	103804007	0	0		17.1196	4.09758
CESC	4p	amp	1	0	1	0	1	0	0.0850794	-3.55505	47014893	0.0850794	0.215986	2.53864	2.4902	1.31626
CESC	4p	del	8.0362	3.00651	1	0	8.0362	3.00651	0.260198	-1.94232	47014893	2.091	4.96768	2.37574	2.4902	1.31626
CESC	4q	amp	1	0	1	0	1	0	0.0661449	-3.91823	136064895	0.0661449	0.215986	3.26535	2.4902	1.31626
CESC	4q	del	1	0	1	0	1	0	0.242531	-2.04376	136064895	0.242531	0.431972	1.7811	2.4902	1.31626
CESC	5p	amp	1	0	1	0	1	0	0.60723	-0.719686	44464224	0.60723	16.6442	27.41	15.9171	3.99251
CESC	5p	del	1	0	1	0	1	0	0.04498	-4.47457	44464224	0.04498	0	0	15.9171	3.99251
CESC	5q	amp	1	0	1	0	1	0	0.0921407	-3.44002	130235614	0.0921407	0.210686	2.28657	15.9171	3.99251
CESC	5q	del	1	0	1	0	1	0	0.161246	-2.63266	130235614	0.161246	5.47784	33.9719	15.9171	3.99251
CESC	6p	amp	1	0	1	0	1	0	0.391513	-1.35287	56192205	0.391513	0.596653	1.52397	1.43813	0.524196
CESC	6p	del	1	0	1	0	1	0	0.284737	-1.8123	56192205	0.284737	0	0	1.43813	0.524196
CESC	6q	amp	1	0	1	0	1	0	0.0460111	-4.44187	108669387	0.0460111	0	0	1.43813	0.524196
CESC	6q	del	1	0	1	0	1	0	0.423302	-1.24024	108669387	0.423302	1.78996	4.22856	1.43813	0.524196
CESC	7p	amp	1	0	1	0	1	0	0.157258	-2.66879	57230627	0.157258	0.386372	2.45693	3.46269	1.79189
CESC	7p	del	1	0	1	0	1	0	0.174732	-2.51679	57230627	0.174732	0	0	3.46269	1.79189
CESC	7q	amp	1	0	1	0	1	0	0.0944655	-3.40407	95272854	0.0944655	0.579559	6.13513	3.46269	1.79189
CESC	7q	del	1	0	1	0	1	0	0.293893	-1.76664	95272854	0.293893	1.54549	5.25869	3.46269	1.79189
CESC	8p	amp	1	0	1	0	1	0	0.0472638	-4.40312	42315706	0.0472638	0	0	4.19093	2.06727
CESC	8p	del	3.96107	1.98589	1	0	3.96107	1.98589	0.64783	-0.626314	42315706	2.5661	3.97564	1.54929	4.19093	2.06727
CESC	8q	amp	1	0	1	0	1	0	0.337521	-1.56695	97771552	0.337521	3.31303	9.81577	4.19093	2.06727
CESC	8q	del	1	0	1	0	1	0	0.0409117	-4.61134	97771552	0.0409117	0.220869	5.39867	4.19093	2.06727
CESC	9p	amp	1	0	1	0	1	0	0.553247	-0.854005	37957757	0.553247	0.123872	0.2239	0.796962	-0.327417
CESC	9p	del	1	0	1	0	1	0	0.474211	-1.0764	37957757	0.474211	0.185808	0.391826	0.796962	-0.327417
CESC	9q	amp	1	0	1	0	1	0	0.243206	-2.03975	69899709	0.243206	0.30968	1.27333	0.796962	-0.327417
CESC	9q	del	1	0	1	0	1	0	0.143062	-2.80529	69899709	0.143062	0.185808	1.29879	0.796962	-0.327417
CHOL	10p	amp	1	0	1	0	1	0	0.0776222	-3.68739	38648761	0.0776222	0	0	6.76885	2.75891
CHOL	10p	del	1	0	1	0	1	0	0.0776222	-3.68739	38648761	0.0776222	0.257469	3.31695	6.76885	2.75891
CHOL	10q	amp	1	0	1	0	1	0	0.0108369	-6.5279	92277118	0.0108369	0.257469	23.7585	6.76885	2.75891
CHOL	10q	del	1	0	1	0	1	0	0.0541846	-4.20597	92277118	0.0541846	0	0	6.76885	2.75891
CHOL	11p	amp	1	0	1	0	1	0	0.0403232	-4.63225	49599211	0.0403232	0	0	inf	inf
CHOL	11p	del	1	0	1	0	1	0	0	#NAME?	49599211	0	0.335657	inf	inf	inf
CHOL	11q	amp	1	0	1	0	1	0	0	#NAME?	78128733	0	0		inf	inf
CHOL	11q	del	1	0	1	0	1	0	0.0895957	-3.48043	78128733	0.0895957	0	0	inf	inf
CHOL	12p	amp	1	0	1	0	1	0	0.061291	-4.02818	32631206	0.061291	0.526089	8.58346	5.05758	2.33845
CHOL	12p	del	1	0	1	0	1	0	0.0306455	-5.02818	32631206	0.0306455	0	0	5.05758	2.33845
CHOL	12q	amp	1	0	1	0	1	0	0	#NAME?	93937781	0	0		5.05758	2.33845
CHOL	12q	del	1	0	1	0	1	0	0.0532267	-4.23171	93937781	0.0532267	0.350726	6.58928	5.05758	2.33845
CHOL	13	amp	1	0	1	0	1	0	0.0209344	-5.57798	95536653	0.0209344	0.205647	9.82341	36.8378	5.20312
CHOL	13	del	1	0	1	0	1	0	0.0104672	-6.57798	95536653	0.0104672	0.668353	63.8522	36.8378	5.20312
CHOL	14	amp	1	0	1	0	1	0	0.0116977	-6.41763	85486671	0.0116977	0.0975545	8.33961	6.25471	2.64494
CHOL	14	del	1	0	1	0	1	0	0.10528	-3.2477	85486671	0.10528	0.438995	4.1698	6.25471	2.64494
CHOL	15	amp	1	0	1	0	1	0	0.0511531	-4.28903	78196623	0.0511531	0.379944	7.42759	inf	inf
CHOL	15	del	1	0	1	0	1	0	0	#NAME?	78196623	0	0.168864	inf	inf	inf
CHOL	16p	amp	1	0	1	0	1	0	0.0320545	-4.96333	31196841	0.0320545	0.0682251	2.12841	2.17195	1.11899
CHOL	16p	del	1	0	1	0	1	0	0.0320545	-4.96333	31196841	0.0320545	0	0	2.17195	1.11899
CHOL	16q	amp	1	0	1	0	1	0	0	#NAME?	42872272	0	0		2.17195	1.11899
CHOL	16q	del	1	0	1	0	1	0	0.0466502	-4.42197	42872272	0.0466502	0.204675	4.38745	2.17195	1.11899
CHOL	17p	amp	1	0	1	0	1	0	0	#NAME?	20318172	0	0		6.95543	2.79814
CHOL	17p	del	1	0	1	0	1	0	0.147651	-2.75974	20318172	0.147651	1.0088	6.83229	6.95543	2.79814
CHOL	17q	amp	1	0	1	0	1	0	0.0718823	-3.79822	55646500	0.0718823	1.0088	14.034	6.95543	2.79814
CHOL	17q	del	1	0	1	0	1	0	0.0179706	-5.79822	55646500	0.0179706	0	0	6.95543	2.79814
CHOL	18p	amp	1	0	1	0	1	0	0.0699735	-3.83705	14291122	0.0699735	0	0	0.58536	-0.772603
CHOL	18p	del	1	0	1	0	1	0	0.139947	-2.83705	14291122	0.139947	0.245758	1.75608	0.58536	-0.772603
CHOL	18q	amp	1	0	1	0	1	0	0	#NAME?	58419494	0	0		0.58536	-0.772603
CHOL	18q	del	1	0	1	0	1	0	0.188293	-2.40895	58419494	0.188293	0	0	0.58536	-0.772603
CHOL	19p	amp	1	0	1	0	1	0	0.0420717	-4.57101	23768975	0.0420717	0	0	5.07728	2.34406
CHOL	19p	del	1	0	1	0	1	0	0.0420717	-4.57101	23768975	0.0420717	0.238806	5.67617	5.07728	2.34406
CHOL	19q	amp	1	0	1	0	1	0	0.0326395	-4.93724	30637733	0.0326395	0.477612	14.6329	5.07728	2.34406
CHOL	19q	del	1	0	1	0	1	0	0.065279	-3.93724	30637733	0.065279	0	0	5.07728	2.34406
CHOL	1p	amp	1	0	1	0	1	0	0	#NAME?	117308752	0	0		15.0884	3.91536
CHOL	1p	del	1	0	1	0	1	0	0.230162	-2.11928	117308752	0.230162	0.034069	0.148022	15.0884	3.91536
CHOL	1q	amp	1	0	1	0	1	0	0.0102109	-6.61374	97934162	0.0102109	0.306621	30.0287	15.0884	3.91536
CHOL	1q	del	1	0	1	0	1	0	0	#NAME?	97934162	0	0		15.0884	3.91536
CHOL	20p	amp	1	0	1	0	1	0	0.0388468	-4.68606	25742136	0.0388468	0	0	inf	inf
CHOL	20p	del	1	0	1	0	1	0	0.194234	-2.36413	25742136	0.194234	0.274268	1.41205	inf	inf
CHOL	20q	amp	1	0	1	0	1	0	0	#NAME?	32375865	0	0.548535	inf	inf	inf
CHOL	20q	del	1	0	1	0	1	0	0	#NAME?	32375865	0	0		inf	inf
CHOL	21	amp	1	0	1	0	1	0	0.0618598	-4.01485	32331154	0.0618598	0.39094	6.31977	16.8527	4.07491
CHOL	21	del	1	0	1	0	1	0	0.0309299	-5.01485	32331154	0.0309299	0.847037	27.3857	16.8527	4.07491
CHOL	22	amp	1	0	1	0	1	0	0.031341	-4.9958	31907083	0.031341	0.344354	10.9873	6.40928	2.68016
CHOL	22	del	1	0	1	0	1	0	0.062682	-3.9958	31907083	0.062682	0.114785	1.83122	6.40928	2.68016
CHOL	2p	amp	1	0	1	0	1	0	0.0225615	-5.46999	88646532	0.0225615	0	0	0	#NAME?
CHOL	2p	del	1	0	1	0	1	0	0.0112808	-6.46999	88646532	0.0112808	0	0	0	#NAME?
CHOL	2q	amp	1	0	1	0	1	0	0.0203895	-5.61603	147134363	0.0203895	0	0	0	#NAME?
CHOL	2q	del	1	0	1	0	1	0	0	#NAME?	147134363	0	0		0	#NAME?
CHOL	3p	amp	1	0	1	0	1	0	0.0113284	-6.46391	88273392	0.0113284	0	0	14.31	3.83896
CHOL	3p	del	1	0	1	0	1	0	0.113284	-3.14198	88273392	0.113284	1.84689	16.3031	14.31	3.83896
CHOL	3q	amp	1	0	1	0	1	0	0.0578012	-4.11276	103804007	0.0578012	1.53907	26.627	14.31	3.83896
CHOL	3q	del	1	0	1	0	1	0	0	#NAME?	103804007	0	0		14.31	3.83896
CHOL	4p	amp	1	0	1	0	1	0	0	#NAME?	47014893	0	0.647958	inf	inf	inf
CHOL	4p	del	1	0	1	0	1	0	0	#NAME?	47014893	0	0		inf	inf
CHOL	4q	amp	1	0	1	0	1	0	0	#NAME?	136064895	0	0		inf	inf
CHOL	4q	del	1	0	1	0	1	0	0.0734943	-3.76622	136064895	0.0734943	0.647958	8.81643	inf	inf
CHOL	5p	amp	1	0	1	0	1	0	0.04498	-4.47457	44464224	0.04498	0.632058	14.052	inf	inf
CHOL	5p	del	1	0	1	0	1	0	0.02249	-5.47457	44464224	0.02249	0	0	inf	inf
CHOL	5q	amp	1	0	1	0	1	0	0.0307136	-5.02498	130235614	0.0307136	0	0	inf	inf
CHOL	5q	del	1	0	1	0	1	0	0	#NAME?	130235614	0	0.210686	inf	inf	inf
CHOL	6p	amp	1	0	1	0	1	0	0.0355921	-4.8123	56192205	0.0355921	0.795538	22.3515	6.14875	2.62029
CHOL	6p	del	1	0	1	0	1	0	0.0355921	-4.8123	56192205	0.0355921	0	0	6.14875	2.62029
CHOL	6q	amp	1	0	1	0	1	0	0.00920222	-6.7638	108669387	0.00920222	0	0	6.14875	2.62029
CHOL	6q	del	2.92631	1.54908	1	0	2.92631	1.54908	0.151468	-2.72292	108669387	0.443243	0.994422	2.24351	6.14875	2.62029
CHOL	7p	amp	1	0	1	0	1	0	0.0349463	-4.83872	57230627	0.0349463	0	0	0	#NAME?
CHOL	7p	del	1	0	1	0	1	0	0.0174732	-5.83872	57230627	0.0174732	0	0	0	#NAME?
CHOL	7q	amp	1	0	1	0	1	0	0.0104962	-6.57399	95272854	0.0104962	0	0	0	#NAME?
CHOL	7q	del	1	0	1	0	1	0	0.0104962	-6.57399	95272854	0.0104962	0	0	0	#NAME?
CHOL	8p	amp	1	0	1	0	1	0	0.0236319	-5.40312	42315706	0.0236319	0	0	6.97922	2.80307
CHOL	8p	del	1	0	1	0	1	0	0.0945275	-3.40312	42315706	0.0945275	1.10434	11.6828	6.97922	2.80307
CHOL	8q	amp	1	0	1	0	1	0	0.0715955	-3.80399	97771552	0.0715955	0.662607	9.25487	6.97922	2.80307
CHOL	8q	del	1	0	1	0	1	0	0	#NAME?	97771552	0	0		6.97922	2.80307
CHOL	9p	amp	1	0	1	0	1	0	0.0790352	-3.66136	37957757	0.0790352	0	0	inf	inf
CHOL	9p	del	1	0	1	0	1	0	0.0526902	-4.24632	37957757	0.0526902	0.030968	0.587739	inf	inf
CHOL	9q	amp	1	0	1	0	1	0	0.0143062	-6.12721	69899709	0.0143062	0.030968	2.16466	inf	inf
CHOL	9q	del	1	0	1	0	1	0	0	#NAME?	69899709	0	0.123872	inf	inf	inf
COAD	10p	amp	1	0	1	0	1	0	0.206992	-2.27235	38648761	0.206992	1.54481	7.46313	2.79385	1.48225
COAD	10p	del	1	0	1	0	1	0	0.388111	-1.36546	38648761	0.388111	0	0	2.79385	1.48225
COAD	10q	amp	1	0	1	0	1	0	0.108369	-3.20597	92277118	0.108369	0	0	2.79385	1.48225
COAD	10q	del	1	0	1	0	1	0	0.346782	-1.5279	92277118	0.346782	1.28734	3.71226	2.79385	1.48225
COAD	11p	amp	1	0	1	0	1	0	0.141131	-2.82489	49599211	0.141131	0.671314	4.75666	2.41099	1.26962
COAD	11p	del	1	0	1	0	1	0	0.282263	-1.82489	49599211	0.282263	0	0	2.41099	1.26962
COAD	11q	amp	1	0	1	0	1	0	0.127994	-2.96585	78128733	0.127994	0.167828	1.31122	2.41099	1.26962
COAD	11q	del	1	0	1	0	1	0	0.140793	-2.82835	78128733	0.140793	0.503485	3.57606	2.41099	1.26962
COAD	12p	amp	1	0	1	0	1	0	0.704847	-0.504618	32631206	0.704847	0.701452	0.995184	0.923232	-0.115234
COAD	12p	del	1	0	1	0	1	0	0.367746	-1.44322	32631206	0.367746	0.526089	1.43058	0.923232	-0.115234
COAD	12q	amp	1	0	1	0	1	0	0.0851628	-3.55363	93937781	0.0851628	0	0	0.923232	-0.115234
COAD	12q	del	1	0	1	0	1	0	0.138389	-2.85319	93937781	0.138389	0.175363	1.26717	0.923232	-0.115234
COAD	13	amp	2.97732	1.57401	1	0	2.97732	1.57401	0.127309	-2.97359	95536653	0.37904	11.4648	30.247	16.7607	4.06701
COAD	13	del	1	0	1	0	1	0	0.0628031	-3.99302	95536653	0.0628031	0.205647	3.27447	16.7607	4.06701
COAD	14	amp	1	0	1	0	1	0	0.0233955	-5.41763	85486671	0.0233955	0.926767	39.6131	36.4858	5.18926
COAD	14	del	1	0	1	0	1	0	0.175466	-2.51074	85486671	0.175466	5.85327	33.3584	36.4858	5.18926
COAD	15	amp	1	0	1	0	1	0	0.204612	-2.28903	78196623	0.204612	0.295512	1.44425	23.6468	4.56357
COAD	15	del	1	0	1	0	1	0	0.115094	-3.11911	78196623	0.115094	5.277	45.8493	23.6468	4.56357
COAD	16p	amp	1	0	1	0	1	0	0.256436	-1.96333	31196841	0.256436	0.2729	1.0642	0.473953	-1.07718
COAD	16p	del	1	0	1	0	1	0	0.7052	-0.503896	31196841	0.7052	0	0	0.473953	-1.07718
COAD	16q	amp	1	0	1	0	1	0	0.139951	-2.83701	42872272	0.139951	0.0682251	0.487494	0.473953	-1.07718
COAD	16q	del	1	0	1	0	1	0	0.396527	-1.33451	42872272	0.396527	0.13645	0.344113	0.473953	-1.07718
COAD	17p	amp	1	0	1	0	1	0	0.393736	-1.3447	20318172	0.393736	0	0	10.9335	3.45069
COAD	17p	del	14.9952	3.90643	1	0	14.9952	3.90643	0.425879	-1.23148	20318172	6.38613	26.4809	4.14663	10.9335	3.45069
COAD	17q	amp	1	0	1	0	1	0	0.287529	-1.79822	55646500	0.287529	10.8446	37.7163	10.9335	3.45069
COAD	17q	del	1	0	1	0	1	0	0.269559	-1.89133	55646500	0.269559	0.504398	1.8712	10.9335	3.45069
COAD	18p	amp	1	0	1	0	1	0	0.279894	-1.83705	14291122	0.279894	0.737275	2.63412	1.70335	0.768377
COAD	18p	del	1	0	1	0	1	0	0.979629	-0.0296924	14291122	0.979629	2.21182	2.25782	1.70335	0.768377
COAD	18q	amp	1	0	1	0	1	0	0.0171176	-5.86838	58419494	0.0171176	0	0	1.70335	0.768377
COAD	18q	del	6.87731	2.78184	1	0	6.87731	2.78184	0.167378	-2.57882	58419494	1.15111	2.21182	1.92147	1.70335	0.768377
COAD	19p	amp	1	0	1	0	1	0	0.336573	-1.57101	23768975	0.336573	0.955224	2.83809	4.39239	2.13501
COAD	19p	del	1	0	0.463687	-1.10878	0.463687	-1.10878	1.4179	0.503759	23768975	0.657464	2.14925	3.26901	4.39239	2.13501
COAD	19q	amp	1	0	1	0	1	0	0.326395	-1.61531	30637733	0.326395	3.58209	10.9747	4.39239	2.13501
COAD	19q	del	1	0	1	0	1	0	0.489592	-1.03035	30637733	0.489592	0.238806	0.487765	4.39239	2.13501
COAD	1p	amp	1	0	1	0	1	0	0.0681961	-3.87417	117308752	0.0681961	0	0	3.47693	1.79781
COAD	1p	del	1	0	1	0	1	0	0.485897	-1.04128	117308752	0.485897	1.4309	2.94486	3.47693	1.79781
COAD	1q	amp	1	0	1	0	1	0	0.142953	-2.80639	97934162	0.142953	1.56717	10.9629	3.47693	1.79781
COAD	1q	del	1	0	1	0	1	0	0.102109	-3.29181	97934162	0.102109	0	0	3.47693	1.79781
COAD	20p	amp	1	0	1	0	1	0	0.194234	-2.36413	25742136	0.194234	1.09707	5.64819	22.227	4.47424
COAD	20p	del	2.43205	1.28217	1	0	2.43205	1.28217	1.32974	0.411144	25742136	3.23399	7.13096	2.205	22.227	4.47424
COAD	20q	amp	1	0	1	0	1	0	0.247098	-2.01685	32375865	0.247098	14.5362	58.8277	22.227	4.47424
COAD	20q	del	1	0	1	0	1	0	0	#NAME?	32375865	0	0		22.227	4.47424
COAD	21	amp	1	0	1	0	1	0	0.15465	-2.69293	32331154	0.15465	0.78188	5.05582	11.6025	3.53636
COAD	21	del	1	0	1	0	1	0	0.402089	-1.31441	32331154	0.402089	7.29755	18.1491	11.6025	3.53636
COAD	22	amp	1	0	1	0	1	0	0.062682	-3.9958	31907083	0.062682	0.0573923	0.915611	5.99507	2.58378
COAD	22	del	1	0	1	0	1	0	0.658161	-0.603487	31907083	0.658161	7.28883	11.0745	5.99507	2.58378
COAD	2p	amp	1	0	1	0	1	0	0.101527	-3.30007	88646532	0.101527	0	0	2.36895	1.24425
COAD	2p	del	1	0	1	0	1	0	0.101527	-3.30007	88646532	0.101527	0	0	2.36895	1.24425
COAD	2q	amp	1	0	1	0	1	0	0.0679651	-3.87906	147134363	0.0679651	0.644024	9.47581	2.36895	1.24425
COAD	2q	del	1	0	1	0	1	0	0.0883546	-3.50055	147134363	0.0883546	0	0	2.36895	1.24425
COAD	3p	amp	1	0	1	0	1	0	0.0566422	-4.14198	88273392	0.0566422	0.307815	5.43437	3.29406	1.71987
COAD	3p	del	1	0	1	0	1	0	0.328525	-1.60593	88273392	0.328525	1.23126	3.74784	3.29406	1.71987
COAD	3q	amp	1	0	1	0	1	0	0.231205	-2.11276	103804007	0.231205	0.923444	3.99405	3.29406	1.71987
COAD	3q	del	1	0	1	0	1	0	0.0289006	-5.11276	103804007	0.0289006	0	0	3.29406	1.71987
COAD	4p	amp	1	0	1	0	1	0	0.170159	-2.55505	47014893	0.170159	0	0	4.65247	2.218
COAD	4p	del	1	0	1	0	1	0	0.382857	-1.38512	47014893	0.382857	1.72789	4.51314	4.65247	2.218
COAD	4q	amp	1	0	1	0	1	0	0.0220483	-5.50319	136064895	0.0220483	0.215986	9.79604	4.65247	2.218
COAD	4q	del	1	0	1	0	1	0	0.301327	-1.7306	136064895	0.301327	1.29592	4.3007	4.65247	2.218
COAD	5p	amp	1	0	1	0	1	0	0.17992	-2.47457	44464224	0.17992	5.89921	32.788	19.0492	4.25166
COAD	5p	del	1	0	1	0	1	0	0.26988	-1.88961	44464224	0.26988	0.210686	0.780666	19.0492	4.25166
COAD	5q	amp	1	0	1	0	1	0	0.122854	-3.02498	130235614	0.122854	0.421372	3.42985	19.0492	4.25166
COAD	5q	del	1	0	1	0	1	0	0.107497	-3.21763	130235614	0.107497	4.21372	39.1983	19.0492	4.25166
COAD	6p	amp	1	0	1	0	1	0	0.160165	-2.64237	56192205	0.160165	0.397769	2.4835	2.44922	1.29232
COAD	6p	del	1	0	1	0	1	0	0.302533	-1.72484	56192205	0.302533	0	0	2.44922	1.29232
COAD	6q	amp	1	0	1	0	1	0	0.08282	-3.59388	108669387	0.08282	0.198884	2.4014	2.44922	1.29232
COAD	6q	del	1	0	1	0	1	0	0.202449	-2.30437	108669387	0.202449	0.994422	4.91196	2.44922	1.29232
COAD	7p	amp	1	0	1	0	1	0	0.349463	-1.51679	57230627	0.349463	0.772745	2.21123	1.47308	0.558834
COAD	7p	del	1	0	1	0	1	0	0.0174732	-5.83872	57230627	0.0174732	0	0	1.47308	0.558834
COAD	7q	amp	1	0	1	0	1	0	0.115458	-3.11456	95272854	0.115458	0	0	1.47308	0.558834
COAD	7q	del	1	0	1	0	1	0	0.0524808	-4.25207	95272854	0.0524808	0.193186	3.68108	1.47308	0.558834
COAD	8p	amp	1	0	1	0	1	0	0.189055	-2.40312	42315706	0.189055	0.220869	1.16828	5.06755	2.34129
COAD	8p	del	16.8045	4.07077	1	0	16.8045	4.07077	0.488291	-1.03419	42315706	8.20546	4.85912	0.592181	5.06755	2.34129
COAD	8q	amp	1	0	1	0	1	0	0.357977	-1.48206	97771552	0.357977	6.62607	18.5097	5.06755	2.34129
COAD	8q	del	1	0	0.0328857	-4.92639	0.0328857	-4.92639	0.383106	-1.38418	97771552	0.0125987	0	0	5.06755	2.34129
COAD	9p	amp	1	0	1	0	1	0	0.210761	-2.24632	37957757	0.210761	0.371616	1.76322	1.52259	0.606524
COAD	9p	del	1	0	1	0	1	0	0.184416	-2.43897	37957757	0.184416	0.15484	0.839627	1.52259	0.606524
COAD	9q	amp	1	0	1	0	1	0	0.128756	-2.95729	69899709	0.128756	0.123872	0.96207	1.52259	0.606524
COAD	9q	del	1	0	1	0	1	0	0.0858373	-3.54225	69899709	0.0858373	0.216776	2.52543	1.52259	0.606524
COADREAD	10p	amp	1	0	1	0	1	0	0.232866	-2.10243	38648761	0.232866	3.08962	13.2678	4.32795	2.11368
COADREAD	10p	del	1	0	1	0	1	0	0.569229	-0.812919	38648761	0.569229	0	0	4.32795	2.11368
COADREAD	10q	amp	1	0	1	0	1	0	0.151717	-2.72055	92277118	0.151717	0	0	4.32795	2.11368
COADREAD	10q	del	1	0	1	0	1	0	0.509335	-0.973312	92277118	0.509335	2.05975	4.04399	4.32795	2.11368
COADREAD	11p	amp	1	0	1	0	1	0	0.241939	-2.04728	49599211	0.241939	1.00697	4.16208	2.4531	1.29461
COADREAD	11p	del	1	0	1	0	1	0	0.423394	-1.23993	49599211	0.423394	0	0	2.4531	1.29461
COADREAD	11q	amp	1	0	1	0	1	0	0.20479	-2.28778	78128733	0.20479	0.167828	0.819514	2.4531	1.29461
COADREAD	11q	del	1	0	1	0	1	0	0.243188	-2.03985	78128733	0.243188	1.1748	4.83082	2.4531	1.29461
COADREAD	12p	amp	1	0	1	0	1	0	0.919365	-0.12129	32631206	0.919365	1.57827	1.71669	2.14186	1.09886
COADREAD	12p	del	1	0	1	0	1	0	0.459683	-1.12129	32631206	0.459683	1.05218	2.28892	2.14186	1.09886
COADREAD	12q	amp	1	0	1	0	1	0	0.138389	-2.85319	93937781	0.138389	0.175363	1.26717	2.14186	1.09886
COADREAD	12q	del	1	0	1	0	1	0	0.212907	-2.23171	93937781	0.212907	0.701452	3.29464	2.14186	1.09886
COADREAD	13	amp	1	0	1	0	1	0	0.240745	-2.05442	95536653	0.240745	16.606	68.9774	36.6717	5.1966
COADREAD	13	del	1	0	1	0	1	0	0.0942047	-3.40806	95536653	0.0942047	0.411294	4.36596	36.6717	5.1966
COADREAD	14	amp	1	0	1	0	1	0	0.0701864	-3.83267	85486671	0.0701864	1.26821	18.0691	24.3239	4.6043
COADREAD	14	del	1	0	1	0	1	0	0.280746	-1.83267	85486671	0.280746	8.58479	30.5786	24.3239	4.6043
COADREAD	15	amp	1	0	1	0	1	0	0.230189	-2.11911	78196623	0.230189	0.42216	1.83397	23.7711	4.57114
COADREAD	15	del	1	0	1	0	1	0	0.166248	-2.58859	78196623	0.166248	7.59889	45.7082	23.7711	4.57114
COADREAD	16p	amp	1	0	1	0	1	0	0.288491	-1.7934	31196841	0.288491	0.341125	1.18245	0.48936	-1.03103
COADREAD	16p	del	1	0	1	0	1	0	0.865472	-0.208441	31196841	0.865472	0	0	0.48936	-1.03103
COADREAD	16q	amp	1	0	1	0	1	0	0.209926	-2.25205	42872272	0.209926	0.0682251	0.324996	0.48936	-1.03103
COADREAD	16q	del	1	0	1	0	1	0	0.606453	-0.721533	42872272	0.606453	0.2729	0.449995	0.48936	-1.03103
COADREAD	17p	amp	1	0	1	0	1	0	0.541387	-0.885267	20318172	0.541387	0	0	10.4224	3.38162
COADREAD	17p	del	15.2278	3.92864	1	0	15.2278	3.92864	0.72013	-0.473671	20318172	10.966	42.8738	3.90971	10.4224	3.38162
COADREAD	17q	amp	1	0	1	0	1	0	0.413323	-1.27466	55646500	0.413323	15.1319	36.6104	10.4224	3.38162
COADREAD	17q	del	1	0	1	0	1	0	0.431294	-1.21326	55646500	0.431294	0.504398	1.1695	10.4224	3.38162
COADREAD	18p	amp	1	0	1	0	1	0	0.489815	-1.02969	14291122	0.489815	1.47455	3.01042	1.76847	0.822499
COADREAD	18p	del	1	0	1	0	1	0	1.25952	0.332878	14291122	1.25952	2.45758	1.9512	1.76847	0.822499
COADREAD	18q	amp	1	0	1	0	1	0	0.0342351	-4.86838	58419494	0.0342351	0	0	1.76847	0.822499
COADREAD	18q	del	6.09309	2.60717	1	0	6.09309	2.60717	0.267335	-1.90328	58419494	1.62889	3.44062	2.11224	1.76847	0.822499
COADREAD	19p	amp	1	0	1	0	1	0	0.50486	-0.986045	23768975	0.50486	0.955224	1.89206	4.07423	2.02653
COADREAD	19p	del	1	0	1	0	1	0	1.30422	0.383189	23768975	1.30422	3.34328	2.56343	4.07423	2.02653
COADREAD	19q	amp	1	0	1	0	1	0	0.424313	-1.2368	30637733	0.424313	4.77612	11.2561	4.07423	2.02653
COADREAD	19q	del	1	0	1	0	1	0	0.815987	-0.293381	30637733	0.815987	0.477612	0.585318	4.07423	2.02653
COADREAD	1p	amp	1	0	1	0	1	0	0.0852451	-3.55224	117308752	0.0852451	0	0	3.15449	1.65741
COADREAD	1p	del	2.92713	1.54949	0.29037	-1.78403	0.849953	-0.234546	0.668291	-0.581452	117308752	0.568015	1.976	3.47878	3.15449	1.65741
COADREAD	1q	amp	1	0	1	0	1	0	0.234852	-2.09018	97934162	0.234852	2.14635	9.13917	3.15449	1.65741
COADREAD	1q	del	1	0	1	0	1	0	0.153164	-2.70685	97934162	0.153164	0	0	3.15449	1.65741
COADREAD	20p	amp	1	0	1	0	1	0	0.466162	-1.1011	25742136	0.466162	1.37134	2.94177	17.5214	4.13105
COADREAD	20p	del	5.88482	2.557	1	0	5.88482	2.557	0.98128	-0.0272629	25742136	5.77466	10.1479	1.75732	17.5214	4.13105
COADREAD	20q	amp	1	0	1	0	1	0	0.339759	-1.55742	32375865	0.339759	22.2157	65.3865	17.5214	4.13105
COADREAD	20q	del	1	0	1	0	1	0	0.0308872	-5.01685	32375865	0.0308872	0	0	17.5214	4.13105
COADREAD	21	amp	1	0	1	0	1	0	0.278369	-1.84493	32331154	0.278369	1.04251	3.74505	11.6448	3.54161
COADREAD	21	del	1	0	1	0	1	0	0.556739	-0.844928	32331154	0.556739	10.8812	19.5445	11.6448	3.54161
COADREAD	22	amp	1	0	1	0	1	0	0.062682	-3.9958	31907083	0.062682	0.344354	5.49367	12.7607	3.67364
COADREAD	22	del	1	0	0.305558	-1.71048	0.305558	-1.71048	1.64122	0.714766	31907083	0.501487	10.0437	20.0278	12.7607	3.67364
COADREAD	2p	amp	1	0	1	0	1	0	0.203054	-2.30007	88646532	0.203054	0	0	2.43078	1.28142
COADREAD	2p	del	1	0	1	0	1	0	0.191773	-2.38253	88646532	0.191773	0.161006	0.839566	2.43078	1.28142
COADREAD	2q	amp	1	0	1	0	1	0	0.108744	-3.20099	147134363	0.108744	0.966036	8.88357	2.43078	1.28142
COADREAD	2q	del	1	0	0.422864	-1.24173	0.422864	-1.24173	0.355452	-1.49228	147134363	0.150308	0	0	2.43078	1.28142
COADREAD	3p	amp	1	0	1	0	1	0	0.113284	-3.14198	88273392	0.113284	0.307815	2.71718	3.41881	1.7735
COADREAD	3p	del	1	0	1	0	1	0	0.441809	-1.1785	88273392	0.441809	1.84689	4.18028	3.41881	1.7735
COADREAD	3q	amp	1	0	1	0	1	0	0.317907	-1.65332	103804007	0.317907	2.1547	6.77778	3.41881	1.7735
COADREAD	3q	del	1	0	1	0	1	0	0.0578012	-4.11276	103804007	0.0578012	0	0	3.41881	1.7735
COADREAD	4p	amp	1	0	1	0	1	0	0.276508	-1.85461	47014893	0.276508	0.215986	0.78112	4.6922	2.23026
COADREAD	4p	del	1	0	1	0	1	0	0.467937	-1.09561	47014893	0.467937	2.80782	6.00042	4.6922	2.23026
COADREAD	4q	amp	1	0	1	0	1	0	0.0587955	-4.08815	136064895	0.0587955	0.431972	7.34703	4.6922	2.23026
COADREAD	4q	del	1	0	1	0	1	0	0.418918	-1.25526	136064895	0.418918	1.94387	4.64023	4.6922	2.23026
COADREAD	5p	amp	1	0	1	0	1	0	0.29237	-1.77413	44464224	0.29237	9.0595	30.9864	12.4583	3.63904
COADREAD	5p	del	1	0	1	0	1	0	0.35984	-1.47457	44464224	0.35984	0.421372	1.171	12.4583	3.63904
COADREAD	5q	amp	1	0	1	0	1	0	0.207317	-2.27009	130235614	0.207317	0.421372	2.03251	12.4583	3.63904
COADREAD	5q	del	5.40289	2.43373	1	0	5.40289	2.43373	0.0872464	-3.51876	130235614	0.471383	7.37401	15.6434	12.4583	3.63904
COADREAD	6p	amp	1	0	1	0	1	0	0.266941	-1.90541	56192205	0.266941	0.795538	2.9802	2.96729	1.56915
COADREAD	6p	del	1	0	1	0	1	0	0.462698	-1.11186	56192205	0.462698	0.198884	0.429837	2.96729	1.56915
COADREAD	6q	amp	1	0	1	0	1	0	0.138033	-2.85691	108669387	0.138033	0.397769	2.88169	2.96729	1.56915
COADREAD	6q	del	1	0	1	0	1	0	0.285269	-1.80961	108669387	0.285269	1.59108	5.57746	2.96729	1.56915
COADREAD	7p	amp	6.4451	2.6882	1	0	6.4451	2.6882	0.339187	-1.55985	57230627	2.1861	1.15912	0.530222	0.486505	-1.03947
COADREAD	7p	del	1	0	1	0	1	0	0.0174732	-5.83872	57230627	0.0174732	0	0	0.486505	-1.03947
COADREAD	7q	amp	1	0	1	0	1	0	0.146946	-2.76664	95272854	0.146946	0	0	0.486505	-1.03947
COADREAD	7q	del	1	0	1	0	1	0	0.13645	-2.87355	95272854	0.13645	0.193186	1.4158	0.486505	-1.03947
COADREAD	8p	amp	1	0	1	0	1	0	0.212687	-2.2332	42315706	0.212687	0.220869	1.03847	7.40899	2.88928
COADREAD	8p	del	25.3937	4.6664	0.173597	-2.52619	4.40826	2.14021	0.610363	-0.71226	42315706	2.69064	7.28867	2.7089	7.40899	2.88928
COADREAD	8q	amp	2.52485	1.3362	1	0	2.52485	1.3362	0.439613	-1.18569	97771552	1.10996	9.2765	8.35752	7.40899	2.88928
COADREAD	8q	del	1	0	0.0227996	-5.45485	0.0227996	-5.45485	0.552585	-0.855731	97771552	0.0125987	0.220869	17.5311	7.40899	2.88928
COADREAD	9p	amp	1	0	1	0	1	0	0.289796	-1.78689	37957757	0.289796	0.619361	2.13723	1.10729	0.147028
COADREAD	9p	del	1	0	1	0	1	0	0.395176	-1.33943	37957757	0.395176	0.15484	0.391826	1.10729	0.147028
COADREAD	9q	amp	1	0	1	0	1	0	0.257512	-1.95729	69899709	0.257512	0.15484	0.601294	1.10729	0.147028
COADREAD	9q	del	1	0	1	0	1	0	0.214593	-2.22032	69899709	0.214593	0.278712	1.29879	1.10729	0.147028
DIPLOID	10p	amp	1.93957	0.955736	1	0	1.93957	0.955736	4.44114	2.15093	38648761	8.6139	20.855	2.42108	3.32611	1.73384
DIPLOID	10p	del	1	0	0.483489	-1.04844	0.483489	-1.04844	12.6994	3.66669	38648761	6.14001	14.6757	2.39018	3.32611	1.73384
DIPLOID	10q	amp	1	0	0.470156	-1.08879	0.470156	-1.08879	2.42607	1.27862	92277118	1.14063	2.57469	2.25725	3.32611	1.73384
DIPLOID	10q	del	2.20992	1.144	0.604726	-0.725646	1.3364	0.418351	3.55291	1.829	92277118	4.74811	29.6089	6.23594	3.32611	1.73384
DIPLOID	11p	amp	1	0	1	0	1	0	2.21778	1.14911	49599211	2.21778	6.20965	2.79994	2.51771	1.33211
DIPLOID	11p	del	1	0	0.592991	-0.753917	0.592991	-0.753917	13.0884	3.71022	49599211	7.76131	21.3142	2.74621	2.51771	1.33211
DIPLOID	11q	amp	2.26727	1.18096	0.750208	-0.414637	1.70092	0.766319	2.30888	1.20719	78128733	3.92723	6.54531	1.66665	2.51771	1.33211
DIPLOID	11q	del	3.22349	1.68862	0.246682	-2.01928	0.795175	-0.330656	4.72623	2.24069	78128733	3.75818	10.741	2.85803	2.51771	1.33211
DIPLOID	12p	amp	1	0	0.589301	-0.762922	0.589301	-0.762922	9.1909	3.20021	32631206	5.41621	18.9392	3.49676	3.01009	1.5898
DIPLOID	12p	del	1	0	1	0	1	0	6.86459	2.77917	32631206	6.86459	12.4508	1.81377	3.01009	1.5898
DIPLOID	12q	amp	1	0	1	0	1	0	1.68196	0.750147	93937781	1.68196	3.3319	1.98096	3.01009	1.5898
DIPLOID	12q	del	1	0	0.394136	-1.34324	0.394136	-1.34324	4.87199	2.28451	93937781	1.92023	9.11887	4.74886	3.01009	1.5898
DIPLOID	13	amp	1	0	0.438331	-1.18991	0.438331	-1.18991	3.97863	1.99227	95536653	1.74395	20.1534	11.5562	11.0682	3.46835
DIPLOID	13	del	2.78627	1.47834	0.335733	-1.57461	0.935444	-0.0962765	4.5972	2.20076	95536653	4.30043	45.4994	10.5802	11.0682	3.46835
DIPLOID	14	amp	1	0	0.458416	-1.12527	0.458416	-1.12527	3.49837	1.80668	85486671	1.60371	18.5841	11.5882	9.79559	3.29213
DIPLOID	14	del	1.8522	0.889237	0.595147	-0.748682	1.10233	0.140555	3.82062	1.93381	85486671	4.21158	33.7051	8.00296	9.79559	3.29213
DIPLOID	15	amp	1.70102	0.766401	0.21182	-2.23909	0.360311	-1.47269	3.71942	1.89508	78196623	1.34015	14.0579	10.4898	11.5485	3.52963
DIPLOID	15	del	1	0	0.555303	-0.848654	0.555303	-0.848654	2.86434	1.5182	78196623	1.59058	20.0526	12.6071	11.5485	3.52963
DIPLOID	16p	amp	1	0	1	0	1	0	5.19283	2.37652	31196841	5.19283	18.6254	3.58676	1.98283	0.987564
DIPLOID	16p	del	1	0	0.459346	-1.12235	0.459346	-1.12235	13.8031	3.78692	31196841	6.3404	2.25143	0.355093	1.98283	0.987564
DIPLOID	16q	amp	1	0	1	0	1	0	2.72904	1.44839	42872272	2.72904	1.70563	0.624992	1.98283	0.987564
DIPLOID	16q	del	2.42084	1.27551	0.772092	-0.373155	1.86911	0.902354	6.4226	2.68316	42872272	12.0046	40.3893	3.36449	1.98283	0.987564
DIPLOID	17p	amp	1	0	0.236997	-2.07706	0.236997	-2.07706	7.78652	2.96098	20318172	1.84539	1.76539	0.956653	6.62321	2.72753
DIPLOID	17p	del	6.23773	2.64102	0.192155	-2.37966	1.19861	0.261365	6.78268	2.76185	20318172	8.1298	132.404	16.2863	6.62321	2.72753
DIPLOID	17q	amp	6.73694	2.75209	0.325169	-1.62074	2.19064	1.13135	2.84375	1.50779	55646500	6.22963	48.17	7.73239	6.62321	2.72753
DIPLOID	17q	del	1	0	0.108317	-3.20666	0.108317	-3.20666	15.3434	3.93955	55646500	1.66196	2.52199	1.51748	6.62321	2.72753
DIPLOID	18p	amp	1	0	1	0	1	0	9.2365	3.20735	14291122	9.2365	21.6267	2.34144	1.98421	0.988561
DIPLOID	18p	del	1	0	1	0	1	0	11.0558	3.46673	14291122	11.0558	27.7707	2.51186	1.98421	0.988561
DIPLOID	18q	amp	1	0	1	0	1	0	1.76311	0.818123	58419494	1.76311	3.44062	1.95145	1.98421	0.988561
DIPLOID	18q	del	2.21576	1.1478	1	0	2.21576	1.1478	6.95615	2.79829	58419494	15.4132	17.4488	1.13207	1.98421	0.988561
DIPLOID	19p	amp	1	0	0.401503	-1.31652	0.401503	-1.31652	10.2835	3.36226	23768975	4.12885	10.5075	2.54489	4.20129	2.07083
DIPLOID	19p	del	2.26041	1.17658	0.21067	-2.24694	0.4762	-1.07036	19.7845	4.3063	23768975	9.42138	28.6567	3.04167	4.20129	2.07083
DIPLOID	19q	amp	1	0	0.59855	-0.740455	0.59855	-0.740455	9.60867	3.26434	30637733	5.75127	22.6866	3.94461	4.20129	2.07083
DIPLOID	19q	del	2.39404	1.25945	0.132645	-2.91436	0.317558	-1.65491	16.4379	4.03896	30637733	5.21999	37.9701	7.27399	4.20129	2.07083
DIPLOID	1p	amp	1	0	0.424017	-1.23781	0.424017	-1.23781	2.8823	1.52722	117308752	1.22214	0.374759	0.306641	2.36529	1.24202
DIPLOID	1p	del	12.7105	3.66795	0.0681405	-3.87534	0.866101	-0.207393	8.59428	3.10338	117308752	7.44351	13.3891	1.79876	2.36529	1.24202
DIPLOID	1q	amp	1.80853	0.854819	1	0	1.80853	0.854819	2.3233	1.21618	97934162	4.20176	30.5599	7.27311	2.36529	1.24202
DIPLOID	1q	del	1	0	0.302289	-1.726	0.302289	-1.726	2.72774	1.44771	97934162	0.824567	0.068138	0.0826349	2.36529	1.24202
DIPLOID	20p	amp	1	0	1	0	1	0	5.51625	2.46369	25742136	5.51625	13.1648	2.38656	3.17025	1.6646
DIPLOID	20p	del	1	0	1	0	1	0	9.129	3.19046	25742136	9.129	37.3004	4.08592	3.17025	1.6646
DIPLOID	20q	amp	1	0	1	0	1	0	8.55576	3.0969	32375865	8.55576	47.9968	5.60989	3.17025	1.6646
DIPLOID	20q	del	1	0	1	0	1	0	2.74896	1.45889	32375865	2.74896	1.64561	0.598628	3.17025	1.6646
DIPLOID	21	amp	1	0	1	0	1	0	4.33019	2.11443	32331154	4.33019	25.5414	5.89845	7.98136	2.99664
DIPLOID	21	del	1	0	0.462529	-1.11239	0.462529	-1.11239	9.32207	3.22065	32331154	4.31172	43.3944	10.0643	7.98136	2.99664
DIPLOID	22	amp	1	0	1	0	1	0	3.32215	1.73212	31907083	3.32215	19.743	5.94283	6.25288	2.64452
DIPLOID	22	del	1.70203	0.767254	0.357747	-1.48299	0.608895	-0.715735	14.4769	3.85568	31907083	8.81489	57.8515	6.56293	6.25288	2.64452
DIPLOID	2p	amp	1.62301	0.698676	1	0	1.62301	0.698676	2.11338	1.07955	88646532	3.43004	8.37232	2.44088	2.87832	1.52523
DIPLOID	2p	del	1	0	0.319937	-1.64414	0.319937	-1.64414	3.70826	1.89074	88646532	1.18641	3.54213	2.98559	2.87832	1.52523
DIPLOID	2q	amp	1	0	1	0	1	0	0.85636	-0.22371	147134363	0.85636	2.7371	3.19621	2.87832	1.52523
DIPLOID	2q	del	1	0	0.139771	-2.83887	0.139771	-2.83887	9.16572	3.19625	147134363	1.2811	3.70314	2.8906	2.87832	1.52523
DIPLOID	3p	amp	1	0	0.36542	-1.45237	0.36542	-1.45237	3.13122	1.64673	88273392	1.14421	4.30941	3.76626	10.8227	3.43599
DIPLOID	3p	del	5.38834	2.42984	1	0	5.38834	2.42984	2.42003	1.27503	88273392	13.0399	115.123	8.82846	10.8227	3.43599
DIPLOID	3q	amp	3.75839	1.91011	1	0	3.75839	1.91011	2.04145	1.02959	103804007	7.67256	109.582	14.2823	10.8227	3.43599
DIPLOID	3q	del	1	0	0.122082	-3.03407	0.122082	-3.03407	5.37641	2.42664	103804007	0.656365	10.7735	16.4139	10.8227	3.43599
DIPLOID	4p	amp	1	0	0.516513	-0.953124	0.516513	-0.953124	4.78258	2.25779	47014893	2.47026	6.47958	2.62303	2.87221	1.52216
DIPLOID	4p	del	1.66891	0.738905	1	0	1.66891	0.738905	5.2135	2.38225	47014893	8.70086	27.8622	3.20223	2.87221	1.52216
DIPLOID	4q	amp	1	0	1	0	1	0	0.874583	-0.193333	136064895	0.874583	3.23979	3.70438	2.87221	1.52216
DIPLOID	4q	del	1	0	1	0	1	0	4.5199	2.17629	136064895	4.5199	8.85543	1.95921	2.87221	1.52216
DIPLOID	5p	amp	1	0	1	0	1	0	6.99439	2.8062	44464224	6.99439	95.4408	13.6453	8.84331	3.14459
DIPLOID	5p	del	1	0	0.45679	-1.1304	0.45679	-1.1304	3.94775	1.98103	44464224	1.80329	3.16029	1.75251	8.84331	3.14459
DIPLOID	5q	amp	1	0	0.103236	-3.27598	0.103236	-3.27598	3.53742	1.8227	130235614	0.36519	2.9496	8.07691	8.84331	3.14459
DIPLOID	5q	del	2.82401	1.49775	1	0	2.82401	1.49775	1.71802	0.780745	130235614	4.8517	57.728	11.8985	8.84331	3.14459
DIPLOID	6p	amp	1.99128	0.993697	1	0	1.99128	0.993697	3.67609	1.87817	56192205	7.32014	16.7063	2.28224	2.67516	1.41963
DIPLOID	6p	del	1	0	0.355717	-1.4912	0.355717	-1.4912	7.85461	2.97354	56192205	2.79402	4.17657	1.49483	2.67516	1.41963
DIPLOID	6q	amp	1	0	0.304069	-1.71753	0.304069	-1.71753	1.84212	0.881364	108669387	0.560131	2.78438	4.97095	2.67516	1.41963
DIPLOID	6q	del	3.18109	1.66952	1	0	3.18109	1.66952	4.89887	2.29245	108669387	15.5838	30.4293	1.95263	2.67516	1.41963
DIPLOID	7p	amp	3.76581	1.91296	1	0	3.76581	1.91296	3.92286	1.97191	57230627	14.7727	4.63647	0.313853	1.74577	0.803867
DIPLOID	7p	del	1	0	0.547727	-0.868472	0.547727	-0.868472	4.78056	2.25718	57230627	2.61844	1.15912	0.442674	1.74577	0.803867
DIPLOID	7q	amp	1.73971	0.798847	1	0	1.73971	0.798847	2.46199	1.29982	95272854	4.28315	12.3639	2.88664	1.74577	0.803867
DIPLOID	7q	del	1	0	0.481919	-1.05314	0.481919	-1.05314	4.56088	2.18931	95272854	2.19797	7.34107	3.33993	1.74577	0.803867
DIPLOID	8p	amp	1	0	0.219908	-2.18503	0.219908	-2.18503	4.04131	2.01482	42315706	0.888716	3.97564	4.47346	4.30128	2.10477
DIPLOID	8p	del	10.848	3.43936	0.620195	-0.689205	6.72788	2.75015	4.78611	2.25885	42315706	32.2004	96.9615	3.01119	4.30128	2.10477
DIPLOID	8q	amp	10.0111	3.32353	1	0	10.0111	3.32353	1.23832	0.308379	97771552	12.3969	91.2189	7.3582	4.30128	2.10477
DIPLOID	8q	del	1	0	0.116902	-3.09663	0.116902	-3.09663	3.99902	1.99965	97771552	0.467492	1.10434	2.36227	4.30128	2.10477
DIPLOID	9p	amp	1	0	1	0	1	0	4.87384	2.28506	37957757	4.87384	2.2297	0.457483	1.34039	0.422651
DIPLOID	9p	del	4.24887	2.08708	0.417335	-1.26072	1.7732	0.826355	6.16253	2.62352	37957757	10.9274	10.4982	0.96072	1.34039	0.422651
DIPLOID	9q	amp	1	0	0.651283	-0.618645	0.651283	-0.618645	4.49796	2.16927	69899709	2.92944	4.11875	1.40598	1.34039	0.422651
DIPLOID	9q	del	1	0	0.325006	-1.62146	0.325006	-1.62146	5.03204	2.33114	69899709	1.63544	4.14972	2.53737	1.34039	0.422651
DLBC	10p	amp	1	0	1	0	1	0	0.0776222	-3.68739	38648761	0.0776222	0	0	0	#NAME?
DLBC	10p	del	1	0	1	0	1	0	0.0517481	-4.27235	38648761	0.0517481	0	0	0	#NAME?
DLBC	10q	amp	1	0	1	0	1	0	0.0216738	-5.5279	92277118	0.0216738	0	0	0	#NAME?
DLBC	10q	del	1	0	1	0	1	0	0.0108369	-6.5279	92277118	0.0108369	0	0	0	#NAME?
DLBC	11p	amp	1	0	1	0	1	0	0.0403232	-4.63225	49599211	0.0403232	0	0	0	#NAME?
DLBC	11p	del	1	0	1	0	1	0	0	#NAME?	49599211	0	0		0	#NAME?
DLBC	11q	amp	1	0	1	0	1	0	0.0895957	-3.48043	78128733	0.0895957	0	0	0	#NAME?
DLBC	11q	del	1	0	1	0	1	0	0	#NAME?	78128733	0	0		0	#NAME?
DLBC	12p	amp	1	0	1	0	1	0	0.0306455	-5.02818	32631206	0.0306455	0	0	0.953718	-0.068366
DLBC	12p	del	1	0	1	0	1	0	0.061291	-4.02818	32631206	0.061291	0.175363	2.86115	0.953718	-0.068366
DLBC	12q	amp	1	0	1	0	1	0	0.0212907	-5.55363	93937781	0.0212907	0	0	0.953718	-0.068366
DLBC	12q	del	1	0	1	0	1	0	0	#NAME?	93937781	0	0		0.953718	-0.068366
DLBC	13	amp	1	0	1	0	1	0	0	#NAME?	95536653	0	0.154235	inf	inf	inf
DLBC	13	del	1	0	1	0	1	0	0.0523359	-4.25605	95536653	0.0523359	0.102824	1.96468	inf	inf
DLBC	14	amp	1	0	1	0	1	0	0.0233955	-5.41763	85486671	0.0233955	0.0487772	2.0849	3.12735	1.64494
DLBC	14	del	1	0	1	0	1	0	0.0116977	-6.41763	85486671	0.0116977	0.0487772	4.1698	3.12735	1.64494
DLBC	15	amp	1	0	1	0	1	0	0.0255766	-5.28903	78196623	0.0255766	0.0844321	3.30115	inf	inf
DLBC	15	del	1	0	1	0	1	0	0	#NAME?	78196623	0	0.21108	inf	inf	inf
DLBC	16p	amp	1	0	1	0	1	0	0	#NAME?	31196841	0	0.0682251	inf	inf	inf
DLBC	16p	del	1	0	1	0	1	0	0.0641091	-3.96333	31196841	0.0641091	0	0	inf	inf
DLBC	16q	amp	1	0	1	0	1	0	0	#NAME?	42872272	0	0		inf	inf
DLBC	16q	del	1	0	1	0	1	0	0	#NAME?	42872272	0	0.204675	inf	inf	inf
DLBC	17p	amp	1	0	1	0	1	0	0	#NAME?	20318172	0	0		0.366016	-1.45002
DLBC	17p	del	1	0	1	0	1	0	0.344519	-1.53734	20318172	0.344519	0.252199	0.732032	0.366016	-1.45002
DLBC	17q	amp	1	0	1	0	1	0	0	#NAME?	55646500	0	0		0.366016	-1.45002
DLBC	17q	del	1	0	1	0	1	0	0.0179706	-5.79822	55646500	0.0179706	0	0	0.366016	-1.45002
DLBC	18p	amp	1	0	1	0	1	0	0.0699735	-3.83705	14291122	0.0699735	0	0	1.31706	0.397322
DLBC	18p	del	1	0	1	0	1	0	0.139947	-2.83705	14291122	0.139947	0.737275	5.26824	1.31706	0.397322
DLBC	18q	amp	1	0	1	0	1	0	0.0342351	-4.86838	58419494	0.0342351	0	0	1.31706	0.397322
DLBC	18q	del	1	0	1	0	1	0	0.0513527	-4.28342	58419494	0.0513527	0	0	1.31706	0.397322
DLBC	19p	amp	1	0	1	0	1	0	0.0420717	-4.57101	23768975	0.0420717	0	0	0	#NAME?
DLBC	19p	del	1	0	1	0	1	0	0	#NAME?	23768975	0	0		0	#NAME?
DLBC	19q	amp	1	0	1	0	1	0	0.195837	-2.35228	30637733	0.195837	0	0	0	#NAME?
DLBC	19q	del	1	0	1	0	1	0	0.0326395	-4.93724	30637733	0.0326395	0	0	0	#NAME?
DLBC	1p	amp	1	0	1	0	1	0	0	#NAME?	117308752	0	0		2.44638	1.29065
DLBC	1p	del	1	0	1	0	1	0	0.0511471	-4.2892	117308752	0.0511471	0.034069	0.666099	2.44638	1.29065
DLBC	1q	amp	1	0	1	0	1	0	0.0102109	-6.61374	97934162	0.0102109	0.068138	6.67304	2.44638	1.29065
DLBC	1q	del	1	0	1	0	1	0	0.0510547	-4.29181	97934162	0.0510547	0	0	2.44638	1.29065
DLBC	20p	amp	1	0	1	0	1	0	0	#NAME?	25742136	0	0.274268	inf	inf	inf
DLBC	20p	del	1	0	1	0	1	0	0.0388468	-4.68606	25742136	0.0388468	0	0	inf	inf
DLBC	20q	amp	1	0	1	0	1	0	0.0308872	-5.01685	32375865	0.0308872	0	0	inf	inf
DLBC	20q	del	1	0	1	0	1	0	0.0308872	-5.01685	32375865	0.0308872	0	0	inf	inf
DLBC	21	amp	1	0	1	0	1	0	0	#NAME?	32331154	0	0.39094	inf	inf	inf
DLBC	21	del	1	0	1	0	1	0	0	#NAME?	32331154	0	0		inf	inf
DLBC	22	amp	1	0	1	0	1	0	0	#NAME?	31907083	0	0		0.610407	-0.712156
DLBC	22	del	1	0	1	0	1	0	0.094023	-3.41084	31907083	0.094023	0.0573923	0.610407	0.610407	-0.712156
DLBC	2p	amp	1	0	1	0	1	0	0.0112808	-6.46999	88646532	0.0112808	0	0	0	#NAME?
DLBC	2p	del	1	0	1	0	1	0	0.045123	-4.46999	88646532	0.045123	0	0	0	#NAME?
DLBC	2q	amp	1	0	1	0	1	0	0	#NAME?	147134363	0	0		0	#NAME?
DLBC	2q	del	1	0	1	0	1	0	0.00679651	-7.20099	147134363	0.00679651	0	0	0	#NAME?
DLBC	3p	amp	1	0	1	0	1	0	0.0113284	-6.46391	88273392	0.0113284	0	0	0	#NAME?
DLBC	3p	del	1	0	1	0	1	0	0.0113284	-6.46391	88273392	0.0113284	0	0	0	#NAME?
DLBC	3q	amp	1	0	1	0	1	0	0.0192671	-5.69772	103804007	0.0192671	0	0	0	#NAME?
DLBC	3q	del	1	0	1	0	1	0	0.0192671	-5.69772	103804007	0.0192671	0	0	0	#NAME?
DLBC	4p	amp	1	0	1	0	1	0	0	#NAME?	47014893	0	0		0	#NAME?
DLBC	4p	del	1	0	1	0	1	0	0.0212699	-5.55505	47014893	0.0212699	0	0	0	#NAME?
DLBC	4q	amp	1	0	1	0	1	0	0.00734943	-7.08815	136064895	0.00734943	0	0	0	#NAME?
DLBC	4q	del	1	0	1	0	1	0	0.0293977	-5.08815	136064895	0.0293977	0	0	0	#NAME?
DLBC	5p	amp	1	0	1	0	1	0	0.02249	-5.47457	44464224	0.02249	0	0	0	#NAME?
DLBC	5p	del	1	0	1	0	1	0	0	#NAME?	44464224	0	0		0	#NAME?
DLBC	5q	amp	1	0	1	0	1	0	0.00767839	-7.02498	130235614	0.00767839	0	0	0	#NAME?
DLBC	5q	del	1	0	1	0	1	0	0.00767839	-7.02498	130235614	0.00767839	0	0	0	#NAME?
DLBC	6p	amp	1	0	1	0	1	0	0.0711843	-3.8123	56192205	0.0711843	0.198884	2.79394	7.45244	2.89771
DLBC	6p	del	1	0	1	0	1	0	0.0177961	-5.8123	56192205	0.0177961	0	0	7.45244	2.89771
DLBC	6q	amp	1	0	1	0	1	0	0.0184044	-5.7638	108669387	0.0184044	0	0	7.45244	2.89771
DLBC	6q	del	1	0	1	0	1	0	0.0368089	-4.7638	108669387	0.0368089	0.994422	27.0158	7.45244	2.89771
DLBC	7p	amp	1	0	1	0	1	0	0.0524195	-4.25375	57230627	0.0524195	0	0	inf	inf
DLBC	7p	del	1	0	1	0	1	0	0	#NAME?	57230627	0	0		inf	inf
DLBC	7q	amp	1	0	1	0	1	0	0	#NAME?	95272854	0	0.193186	inf	inf	inf
DLBC	7q	del	1	0	1	0	1	0	0.0314885	-4.98903	95272854	0.0314885	0	0	inf	inf
DLBC	8p	amp	1	0	1	0	1	0	0.0236319	-5.40312	42315706	0.0236319	0	0	1.48392	0.569412
DLBC	8p	del	1	0	1	0	1	0	0.0945275	-3.40312	42315706	0.0945275	0.220869	2.33656	1.48392	0.569412
DLBC	8q	amp	1	0	1	0	1	0	0.0613675	-4.02638	97771552	0.0613675	0.220869	3.59912	1.48392	0.569412
DLBC	8q	del	1	0	1	0	1	0	0.0102279	-6.61134	97771552	0.0102279	0	0	1.48392	0.569412
DLBC	9p	amp	1	0	1	0	1	0	0.0790352	-3.66136	37957757	0.0790352	0	0	0	#NAME?
DLBC	9p	del	1	0	1	0	1	0	0.0526902	-4.24632	37957757	0.0526902	0	0	0	#NAME?
DLBC	9q	amp	1	0	1	0	1	0	0.0143062	-6.12721	69899709	0.0143062	0	0	0	#NAME?
DLBC	9q	del	1	0	1	0	1	0	0	#NAME?	69899709	0	0		0	#NAME?
ESCA	10p	amp	1	0	1	0	1	0	0.284615	-1.81292	38648761	0.284615	1.54481	5.42773	4.58107	2.19568
ESCA	10p	del	1	0	1	0	1	0	0.698599	-0.517463	38648761	0.698599	1.02987	1.4742	4.58107	2.19568
ESCA	10q	amp	1	0	1	0	1	0	0.130043	-2.94294	92277118	0.130043	0.772406	5.93961	4.58107	2.19568
ESCA	10q	del	1	0	1	0	1	0	0.28176	-1.82746	92277118	0.28176	1.54481	5.48272	4.58107	2.19568
ESCA	11p	amp	1	0	1	0	1	0	0.201616	-2.31032	49599211	0.201616	0.503485	2.49725	1.42681	0.512792
ESCA	11p	del	1	0	1	0	1	0	0.786303	-0.346843	49599211	0.786303	1.51046	1.92096	1.42681	0.512792
ESCA	11q	amp	4.42411	2.14539	1	0	4.42411	2.14539	0.138746	-2.84948	78128733	0.613827	0.335657	0.546826	1.42681	0.512792
ESCA	11q	del	1	0	1	0	1	0	0.678368	-0.559861	78128733	0.678368	0.503485	0.742201	1.42681	0.512792
ESCA	12p	amp	1	0	1	0	1	0	0.398392	-1.32774	32631206	0.398392	4.03335	10.1241	5.47621	2.45318
ESCA	12p	del	1	0	1	0	1	0	0.520974	-0.940718	32631206	0.520974	0.526089	1.00982	5.47621	2.45318
ESCA	12q	amp	1	0	1	0	1	0	0.138389	-2.85319	93937781	0.138389	0.350726	2.53434	5.47621	2.45318
ESCA	12q	del	1	0	1	0	1	0	0.234198	-2.0942	93937781	0.234198	1.92899	8.2366	5.47621	2.45318
ESCA	13	amp	1	0	1	0	1	0	0.240745	-2.05442	95536653	0.240745	1.38812	5.76592	12.5017	3.64405
ESCA	13	del	1	0	1	0	1	0	0.125606	-2.99302	95536653	0.125606	2.41635	19.2375	12.5017	3.64405
ESCA	14	amp	1	0	1	0	1	0	0.175466	-2.51074	85486671	0.175466	1.51209	8.61759	7.85313	2.97327
ESCA	14	del	1	0	1	0	1	0	0.233955	-2.0957	85486671	0.233955	1.65843	7.08867	7.85313	2.97327
ESCA	15	amp	1	0	1	0	1	0	0.409225	-1.28903	78196623	0.409225	1.0554	2.57902	5.58101	2.48053
ESCA	15	del	1	0	1	0	1	0	0.127883	-2.96711	78196623	0.127883	1.09762	8.58299	5.58101	2.48053
ESCA	16p	amp	1	0	1	0	1	0	0.128218	-2.96333	31196841	0.128218	0.341125	2.66051	2.15253	1.10603
ESCA	16p	del	1	0	1	0	1	0	0.897527	-0.155973	31196841	0.897527	0.818701	0.912175	2.15253	1.10603
ESCA	16q	amp	1	0	1	0	1	0	0.209926	-2.25205	42872272	0.209926	0.614026	2.92496	2.15253	1.10603
ESCA	16q	del	1	0	1	0	1	0	0.419852	-1.25205	42872272	0.419852	0.886926	2.11247	2.15253	1.10603
ESCA	17p	amp	1	0	1	0	1	0	0.344519	-1.53734	20318172	0.344519	0.756597	2.19609	10.6409	3.41154
ESCA	17p	del	1	0	1	0	1	0	0.344519	-1.53734	20318172	0.344519	9.83576	28.5492	10.6409	3.41154
ESCA	17q	amp	1	0	1	0	1	0	0.341441	-1.55029	55646500	0.341441	4.03518	11.8181	10.6409	3.41154
ESCA	17q	del	1	0	0.249823	-2.00102	0.249823	-2.00102	0.995707	-0.0062063	55646500	0.24875	0	0	10.6409	3.41154
ESCA	18p	amp	1	0	1	0	1	0	1.53942	0.622384	14291122	1.53942	2.70334	1.75608	2.19117	1.1317
ESCA	18p	del	1	0	1	0	1	0	0.699735	-0.515119	14291122	0.699735	3.19486	4.56581	2.19117	1.1317
ESCA	18q	amp	1	0	1	0	1	0	0.136941	-2.86838	58419494	0.136941	0.245758	1.79463	2.19117	1.1317
ESCA	18q	del	2.08736	1.06168	1	0	2.08736	1.06168	1.08989	0.124185	58419494	2.275	1.47455	0.648155	2.19117	1.1317
ESCA	19p	amp	1	0	1	0	1	0	0.25243	-1.98605	23768975	0.25243	0.716418	2.83809	3.42241	1.77501
ESCA	19p	del	1	0	1	0	1	0	1.38836	0.473386	23768975	1.38836	5.01492	3.61211	3.42241	1.77501
ESCA	19q	amp	1	0	1	0	1	0	0.62015	-0.68931	30637733	0.62015	3.58209	5.77616	3.42241	1.77501
ESCA	19q	del	1	0	1	0	1	0	0.489592	-1.03035	30637733	0.489592	0.716418	1.46329	3.42241	1.77501
ESCA	1p	amp	1	0	1	0	1	0	0.144917	-2.7867	117308752	0.144917	0.068138	0.470188	1.74001	0.799096
ESCA	1p	del	1	0	1	0	1	0	0.281309	-1.82977	117308752	0.281309	0.647311	2.30107	1.74001	0.799096
ESCA	1q	amp	1	0	1	0	1	0	0.234852	-2.09018	97934162	0.234852	0.885794	3.77172	1.74001	0.799096
ESCA	1q	del	1	0	1	0	1	0	0.0816875	-3.61374	97934162	0.0816875	0.034069	0.417065	1.74001	0.799096
ESCA	20p	amp	1	0	1	0	1	0	0.505009	-0.98562	25742136	0.505009	1.64561	3.25857	11.8587	3.56788
ESCA	20p	del	1	0	1	0	1	0	0.233081	-2.1011	25742136	0.233081	4.66255	20.004	11.8587	3.56788
ESCA	20q	amp	1	0	1	0	1	0	0.277985	-1.84692	32375865	0.277985	5.48535	19.7326	11.8587	3.56788
ESCA	20q	del	1	0	1	0	1	0	0.123549	-3.01685	32375865	0.123549	0.548535	4.43983	11.8587	3.56788
ESCA	21	amp	1	0	1	0	1	0	0.216509	-2.2075	32331154	0.216509	0.78188	3.6113	9.09769	3.1855
ESCA	21	del	1	0	1	0	1	0	0.402089	-1.31441	32331154	0.402089	5.8641	14.5841	9.09769	3.1855
ESCA	22	amp	1	0	1	0	1	0	0.219387	-2.18845	31907083	0.219387	1.37742	6.27848	8.54134	3.09446
ESCA	22	del	1	0	1	0	1	0	0.31341	-1.67388	31907083	0.31341	3.38615	10.8042	8.54134	3.09446
ESCA	2p	amp	1	0	1	0	1	0	0.169211	-2.5631	88646532	0.169211	0.644024	3.80603	2.73536	1.45173
ESCA	2p	del	1	0	1	0	1	0	0.191773	-2.38253	88646532	0.191773	0.483018	2.5187	2.73536	1.45173
ESCA	2q	amp	1	0	1	0	1	0	0.0815581	-3.61603	147134363	0.0815581	0.322012	3.94825	2.73536	1.45173
ESCA	2q	del	1	0	0.467116	-1.09815	0.467116	-1.09815	0.515626	-0.955602	147134363	0.240857	0.161006	0.668471	2.73536	1.45173
ESCA	3p	amp	1	0	1	0	1	0	0.113284	-3.14198	88273392	0.113284	0	0	15.5081	3.95495
ESCA	3p	del	3.14802	1.65444	1	0	3.14802	1.65444	0.235035	-2.08906	88273392	0.739893	16.9298	22.8814	15.5081	3.95495
ESCA	3q	amp	5.66799	2.50284	1	0	5.66799	2.50284	0.0834872	-3.5823	103804007	0.473205	16.0064	33.8255	15.5081	3.95495
ESCA	3q	del	1	0	1	0	1	0	0.0578012	-4.11276	103804007	0.0578012	0.307815	5.3254	15.5081	3.95495
ESCA	4p	amp	1	0	1	0	1	0	0.276508	-1.85461	47014893	0.276508	0.647958	2.34336	3.38557	1.7594
ESCA	4p	del	1	0	1	0	1	0	0.638096	-0.648155	47014893	0.638096	2.59183	4.06182	3.38557	1.7594
ESCA	4q	amp	1	0	1	0	1	0	0.0734943	-3.76622	136064895	0.0734943	0.215986	2.93881	3.38557	1.7594
ESCA	4q	del	1	0	1	0	1	0	0.25723	-1.95887	136064895	0.25723	1.07993	4.1983	3.38557	1.7594
ESCA	5p	amp	1	0	1	0	1	0	0.38233	-1.38711	44464224	0.38233	12.4305	32.5124	15.604	3.96384
ESCA	5p	del	1	0	1	0	1	0	0.13494	-2.88961	44464224	0.13494	0.842744	6.24533	15.604	3.96384
ESCA	5q	amp	1	0	0.123995	-3.01165	0.123995	-3.01165	0.376528	-1.40917	130235614	0.0466874	0.210686	4.5127	15.604	3.96384
ESCA	5q	del	4.72737	2.24104	1	0	4.72737	2.24104	0.0884569	-3.49888	130235614	0.418168	8.00607	19.1456	15.604	3.96384
ESCA	6p	amp	1	0	1	0	1	0	0.249145	-2.00494	56192205	0.249145	0.795538	3.19307	3.78627	1.92078
ESCA	6p	del	1	0	1	0	1	0	0.818619	-0.288736	56192205	0.818619	0.795538	0.971804	3.78627	1.92078
ESCA	6q	amp	1	0	1	0	1	0	0.138033	-2.85691	108669387	0.138033	0.795538	5.76337	3.78627	1.92078
ESCA	6q	del	1	0	1	0	1	0	0.266864	-1.90582	108669387	0.266864	1.39219	5.21684	3.78627	1.92078
ESCA	7p	amp	1	0	1	0	1	0	0.401883	-1.31515	57230627	0.401883	0.772745	1.92281	4.00439	2.00158
ESCA	7p	del	1	0	1	0	1	0	0.157258	-2.66879	57230627	0.157258	0.193186	1.22846	4.00439	2.00158
ESCA	7q	amp	1	0	1	0	1	0	0.0839694	-3.57399	95272854	0.0839694	0.772745	9.2027	4.00439	2.00158
ESCA	7q	del	1.75881	0.814598	0.477752	-1.06567	0.840275	-0.251067	0.502038	-0.994132	95272854	0.42185	1.54549	3.6636	4.00439	2.00158
ESCA	8p	amp	1	0	1	0	1	0	0.236319	-2.08119	42315706	0.236319	0	0	4.01199	2.00432
ESCA	8p	del	3.6853	1.88178	1	0	3.6853	1.88178	0.613156	-0.705673	42315706	2.25966	4.19651	1.85714	4.01199	2.00432
ESCA	8q	amp	1	0	1	0	1	0	0.357977	-1.48206	97771552	0.357977	5.07999	14.1908	4.01199	2.00432
ESCA	8q	del	1	0	1	0	1	0	0.102279	-3.28941	97771552	0.102279	0	0	4.01199	2.00432
ESCA	9p	amp	1	0	1	0	1	0	0.263451	-1.92439	37957757	0.263451	0.0929041	0.352643	1.34768	0.430475
ESCA	9p	del	1	0	1	0	1	0	0.658627	-0.602467	37957757	0.658627	1.11485	1.69269	1.34768	0.430475
ESCA	9q	amp	1	0	1	0	1	0	0.314737	-1.66778	69899709	0.314737	0.712265	2.26305	1.34768	0.430475
ESCA	9q	del	1	0	1	0	1	0	0.0572248	-4.12721	69899709	0.0572248	0.0619361	1.08233	1.34768	0.430475
ESCASTAD	10p	amp	3.60443	1.84977	1	0	3.60443	1.84977	0.50246	-0.99292	38648761	1.81108	5.14937	2.84326	6.00975	2.5873
ESCASTAD	10p	del	1	0	1	0	1	0	1.60419	0.681846	38648761	1.60419	2.83215	1.76547	6.00975	2.5873
ESCASTAD	10q	amp	1	0	0.217927	-2.19808	0.217927	-2.19808	0.646513	-0.62925	92277118	0.140893	1.80228	12.7919	6.00975	2.5873
ESCASTAD	10q	del	1	0	1	0	1	0	0.736911	-0.440438	92277118	0.736911	4.8919	6.63839	6.00975	2.5873
ESCASTAD	11p	amp	1	0	1	0	1	0	0.50404	-0.988389	49599211	0.50404	1.00697	1.9978	1.4894	0.574734
ESCASTAD	11p	del	1	0	1	0	1	0	1.77422	0.827186	49599211	1.77422	2.18177	1.2297	1.4894	0.574734
ESCASTAD	11q	amp	3.12026	1.64167	1	0	3.12026	1.64167	0.40168	-1.31588	78128733	1.25335	0.503485	0.401713	1.4894	0.574734
ESCASTAD	11q	del	1.52609	0.609839	0.224872	-2.15282	0.343175	-1.54298	1.68028	0.748705	78128733	0.576632	1.34263	2.3284	1.4894	0.574734
ESCASTAD	12p	amp	1	0	1	0	1	0	1.19517	0.257222	32631206	1.19517	5.96234	4.98868	4.37073	2.12788
ESCASTAD	12p	del	1	0	1	0	1	0	1.59357	0.672259	32631206	1.59357	1.92899	1.21049	4.37073	2.12788
ESCASTAD	12q	amp	1	0	1	0	1	0	0.425814	-1.23171	93937781	0.425814	0.876815	2.05915	4.37073	2.12788
ESCASTAD	12q	del	1	0	0.34756	-1.52467	0.34756	-1.52467	1.31272	0.392555	93937781	0.456248	4.20871	9.22462	4.37073	2.12788
ESCASTAD	13	amp	1	0	1	0	1	0	0.6699	-0.577982	95536653	0.6699	7.04341	10.5141	10.706	3.42035
ESCASTAD	13	del	1	0	1	0	1	0	0.33495	-1.57798	95536653	0.33495	3.65023	10.8978	10.706	3.42035
ESCASTAD	14	amp	1	0	1	0	1	0	0.397723	-1.33016	85486671	0.397723	2.39008	6.00942	6.34055	2.66461
ESCASTAD	14	del	1	0	1	0	1	0	0.818841	-0.288345	85486671	0.818841	5.46305	6.67169	6.34055	2.66461
ESCASTAD	15	amp	2.8686	1.52035	0.432788	-1.20827	1.24149	0.312077	0.772235	-0.372887	78196623	0.958726	1.98415	2.06957	7.56206	2.91878
ESCASTAD	15	del	1	0	1	0	1	0	0.281342	-1.8296	78196623	0.281342	3.67279	13.0546	7.56206	2.91878
ESCASTAD	16p	amp	1	0	1	0	1	0	0.609036	-0.715401	31196841	0.609036	0.955151	1.5683	1.56222	0.643597
ESCASTAD	16p	del	1	0	0.346524	-1.52897	0.346524	-1.52897	4.43224	2.14804	31196841	1.53588	1.29628	0.843997	1.56222	0.643597
ESCASTAD	16q	amp	1	0	1	0	1	0	0.583127	-0.778117	42872272	0.583127	0.886926	1.52098	1.56222	0.643597
ESCASTAD	16q	del	1	0	1	0	1	0	1.1196	0.16299	42872272	1.1196	2.59255	2.3156	1.56222	0.643597
ESCASTAD	17p	amp	1	0	1	0	1	0	0.935123	-0.0967712	20318172	0.935123	1.0088	1.07878	6.57281	2.71651
ESCASTAD	17p	del	1	0	1	0	1	0	1.91946	0.940704	20318172	1.91946	28.2463	14.7157	6.57281	2.71651
ESCASTAD	17q	amp	1	0	1	0	1	0	1.00635	0.00913588	55646500	1.00635	9.33136	9.27246	6.57281	2.71651
ESCASTAD	17q	del	1	0	0.217264	-2.20248	0.217264	-2.20248	1.89628	0.923175	55646500	0.411995	0.504398	1.22428	6.57281	2.71651
ESCASTAD	18p	amp	1	0	1	0	1	0	3.00886	1.58922	14291122	3.00886	4.17789	1.38853	2.08804	1.06215
ESCASTAD	18p	del	1	0	1	0	1	0	1.53942	0.622384	14291122	1.53942	7.12699	4.62967	2.08804	1.06215
ESCASTAD	18q	amp	1	0	1	0	1	0	0.393704	-1.34482	58419494	0.393704	0.737275	1.87266	2.08804	1.06215
ESCASTAD	18q	del	8.27235	3.0483	1	0	8.27235	3.0483	0.83721	-0.256339	58419494	6.92569	3.19486	0.461305	2.08804	1.06215
ESCASTAD	19p	amp	1	0	0.107136	-3.22248	0.107136	-3.22248	2.93918	1.55541	23768975	0.314892	1.19403	3.79187	3.93159	1.97511
ESCASTAD	19p	del	1	0	1	0	1	0	3.32366	1.73277	23768975	3.32366	15.5224	4.67027	3.93159	1.97511
ESCASTAD	19q	amp	1	0	1	0	1	0	1.95837	0.969653	30637733	1.95837	12.1791	6.219	3.93159	1.97511
ESCASTAD	19q	del	1	0	1	0	1	0	1.37086	0.45508	30637733	1.37086	1.43284	1.04521	3.93159	1.97511
ESCASTAD	1p	amp	1	0	0.299517	-1.73929	0.299517	-1.73929	0.938228	-0.0919896	117308752	0.281015	0.102207	0.363707	1.68569	0.753336
ESCASTAD	1p	del	1	0	1	0	1	0	0.79278	-0.335008	117308752	0.79278	1.66938	2.10573	1.68569	0.753336
ESCASTAD	1q	amp	1	0	1	0	1	0	0.602446	-0.731097	97934162	0.602446	2.48704	4.12824	1.68569	0.753336
ESCASTAD	1q	del	1	0	1	0	1	0	0.234852	-2.09018	97934162	0.234852	0.034069	0.145066	1.68569	0.753336
ESCASTAD	20p	amp	1	0	1	0	1	0	0.932324	-0.101097	25742136	0.932324	3.01694	3.23594	5.33243	2.41479
ESCASTAD	20p	del	1	0	1	0	1	0	0.932324	-0.101097	25742136	0.932324	6.03389	6.47188	5.33243	2.41479
ESCASTAD	20q	amp	1	0	1	0	1	0	1.05016	0.070616	32375865	1.05016	9.87364	9.40199	5.33243	2.41479
ESCASTAD	20q	del	1	0	1	0	1	0	0.247098	-2.01685	32375865	0.247098	0.548535	2.21991	5.33243	2.41479
ESCASTAD	21	amp	1	0	1	0	1	0	0.494879	-1.01485	32331154	0.494879	1.30313	2.63324	6.84642	2.77535
ESCASTAD	21	del	1	0	1	0	1	0	1.48464	0.570109	32331154	1.48464	16.4195	11.0596	6.84642	2.77535
ESCASTAD	22	amp	1	0	1	0	1	0	0.501456	-0.995805	31907083	0.501456	2.18091	4.34915	5.94349	2.57131
ESCASTAD	22	del	1	0	1	0	1	0	1.34766	0.43046	31907083	1.34766	10.1584	7.53782	5.94349	2.57131
ESCASTAD	2p	amp	1	0	1	0	1	0	0.406107	-1.30007	88646532	0.406107	0.80503	1.98231	3.09546	1.63015
ESCASTAD	2p	del	1	0	0.203457	-2.29721	0.203457	-2.29721	0.641417	-0.640665	88646532	0.1305	0.80503	6.16879	3.09546	1.63015
ESCASTAD	2q	amp	1	0	1	0	1	0	0.217488	-2.20099	147134363	0.217488	0.483018	2.22089	3.09546	1.63015
ESCASTAD	2q	del	1	0	0.302057	-1.72711	0.302057	-1.72711	1.32607	0.407152	147134363	0.400547	0.80503	2.00983	3.09546	1.63015
ESCASTAD	3p	amp	1	0	1	0	1	0	0.317196	-1.65655	88273392	0.317196	0	0	8.54922	3.09579
ESCASTAD	3p	del	2.73177	1.44983	1	0	2.73177	1.44983	0.644869	-0.632921	88273392	1.76163	24.3174	13.8039	8.54922	3.09579
ESCASTAD	3q	amp	2.59335	1.37481	1	0	2.59335	1.37481	0.525744	-0.927567	103804007	1.36344	22.7783	16.7065	8.54922	3.09579
ESCASTAD	3q	del	1	0	0.1188	-3.07339	0.1188	-3.07339	0.702848	-0.508716	103804007	0.0834986	0.307815	3.68646	8.54922	3.09579
ESCASTAD	4p	amp	1	0	1	0	1	0	0.765715	-0.385121	47014893	0.765715	1.5119	1.9745	2.95046	1.56094
ESCASTAD	4p	del	1	0	1	0	1	0	1.27619	0.351845	47014893	1.27619	4.53571	3.5541	2.95046	1.56094
ESCASTAD	4q	amp	1	0	1	0	1	0	0.146989	-2.76622	136064895	0.146989	0.215986	1.46941	2.95046	1.56094
ESCASTAD	4q	del	1	0	1	0	1	0	0.764341	-0.387711	136064895	0.764341	3.67176	4.80383	2.95046	1.56094
ESCASTAD	5p	amp	1	0	1	0	1	0	0.92209	-0.117021	44464224	0.92209	24.6503	26.733	11.2142	3.48726
ESCASTAD	5p	del	1	0	1	0	1	0	0.40482	-1.30465	44464224	0.40482	0.842744	2.08178	11.2142	3.48726
ESCASTAD	5q	amp	1	0	0.14859	-2.75059	0.14859	-2.75059	0.516478	-0.953222	130235614	0.0767434	0.210686	2.74533	11.2142	3.48726
ESCASTAD	5q	del	6.52155	2.70522	1	0	6.52155	2.70522	0.191941	-2.38126	130235614	1.25176	16.6442	13.2967	11.2142	3.48726
ESCASTAD	6p	amp	1	0	0.244009	-2.035	0.244009	-2.035	1.94375	0.95884	56192205	0.474291	1.78996	3.77397	3.07075	1.61859
ESCASTAD	6p	del	1	0	0.246934	-2.0178	0.246934	-2.0178	2.39022	1.25715	56192205	0.590228	1.19331	2.02177	3.07075	1.61859
ESCASTAD	6q	amp	1	0	1	0	1	0	0.386493	-1.37148	108669387	0.386493	1.19331	3.08752	3.07075	1.61859
ESCASTAD	6q	del	1	0	1	0	1	0	0.818998	-0.288068	108669387	0.818998	2.78438	3.39974	3.07075	1.61859
ESCASTAD	7p	amp	3.21245	1.68367	1	0	3.21245	1.68367	0.968866	-0.0456302	57230627	3.11243	1.3523	0.434485	2.04559	1.03252
ESCASTAD	7p	del	1	0	1	0	1	0	0.454302	-1.13828	57230627	0.454302	0.193186	0.425237	2.04559	1.03252
ESCASTAD	7q	amp	1	0	1	0	1	0	0.22042	-2.18168	95272854	0.22042	0.965931	4.38224	2.04559	1.03252
ESCASTAD	7q	del	1.47173	0.557511	0.405636	-1.30174	0.596986	-0.744231	1.6508	0.723164	95272854	0.985504	2.89779	2.94042	2.04559	1.03252
ESCASTAD	8p	amp	1	0	1	0	1	0	0.685325	-0.54514	42315706	0.685325	0.441738	0.644567	3.15174	1.65615
ESCASTAD	8p	del	4.60462	2.20308	1	0	4.60462	2.20308	0.994946	-0.00730918	42315706	4.58135	12.8104	2.79621	3.15174	1.65615
ESCASTAD	8q	amp	3.7831	1.91957	1	0	3.7831	1.91957	0.420381	-1.25023	97771552	1.59034	14.5773	9.16617	3.15174	1.65615
ESCASTAD	8q	del	1	0	0.365548	-1.45187	0.365548	-1.45187	0.592056	-0.756195	97771552	0.216425	0	0	3.15174	1.65615
ESCASTAD	9p	amp	1	0	1	0	1	0	0.816697	-0.292127	37957757	0.816697	0.216776	0.26543	0.852704	-0.229882
ESCASTAD	9p	del	5.28158	2.40097	0.434923	-1.20117	2.29708	1.1998	0.930218	-0.104359	37957757	2.13679	1.98195	0.927539	0.852704	-0.229882
ESCASTAD	9q	amp	1	0	1	0	1	0	1.03005	0.0427105	69899709	1.03005	1.08388	1.05226	0.852704	-0.229882
ESCASTAD	9q	del	1	0	1	0	1	0	0.185981	-2.42677	69899709	0.185981	0.216776	1.16558	0.852704	-0.229882
ESCASTADCIN	10p	amp	3.63113	1.86042	1	0	3.63113	1.86042	0.471056	-1.08603	38648761	1.71046	4.1195	2.40841	4.69127	2.22998
ESCASTADCIN	10p	del	1	0	1	0	1	0	1.2937	0.371506	38648761	1.2937	1.80228	1.39312	4.69127	2.22998
ESCASTADCIN	10q	amp	1	0	0.256669	-1.96202	0.256669	-1.96202	0.528634	-0.919659	92277118	0.135684	1.02987	7.59025	4.69127	2.22998
ESCASTADCIN	10q	del	1	0	1	0	1	0	0.628542	-0.66992	92277118	0.628542	4.63443	7.37331	4.69127	2.22998
ESCASTADCIN	11p	amp	1	0	1	0	1	0	0.423394	-1.23993	49599211	0.423394	0.839142	1.98194	1.98833	0.991555
ESCASTADCIN	11p	del	1	0	1	0	1	0	1.43147	0.517502	49599211	1.43147	2.18177	1.52414	1.98833	0.991555
ESCASTADCIN	11q	amp	3.79854	1.92545	1	0	3.79854	1.92545	0.290872	-1.78154	78128733	1.10489	0.503485	0.455689	1.98833	0.991555
ESCASTADCIN	11q	del	2.2333	1.15918	0.187346	-2.41622	0.4184	-1.25705	0.803941	-0.314838	78128733	0.336369	1.34263	3.99153	1.98833	0.991555
ESCASTADCIN	12p	amp	1	0	1	0	1	0	0.919365	-0.12129	32631206	0.919365	4.91016	5.34082	3.9413	1.97867
ESCASTADCIN	12p	del	1	0	1	0	1	0	1.31776	0.398084	32631206	1.31776	1.57827	1.19769	3.9413	1.97867
ESCASTADCIN	12q	amp	1	0	1	0	1	0	0.361942	-1.46617	93937781	0.361942	0.876815	2.42253	3.9413	1.97867
ESCASTADCIN	12q	del	1	0	1	0	1	0	0.489686	-1.03007	93937781	0.489686	3.3319	6.80415	3.9413	1.97867
ESCASTADCIN	13	amp	1	0	1	0	1	0	0.533827	-0.905557	95536653	0.533827	4.72988	8.86033	9.90861	3.30868
ESCASTADCIN	13	del	1	0	1	0	1	0	0.272147	-1.87754	95536653	0.272147	2.98188	10.9569	9.90861	3.30868
ESCASTADCIN	14	amp	1	0	1	0	1	0	0.36263	-1.46343	85486671	0.36263	1.80476	4.97686	5.76471	2.52725
ESCASTADCIN	14	del	1	0	1	0	1	0	0.655073	-0.610273	85486671	0.655073	4.2924	6.55255	5.76471	2.52725
ESCASTADCIN	15	amp	2.1264	1.08841	0.468408	-1.09416	0.996021	-0.00575144	0.802129	-0.318093	78196623	0.798938	1.60421	2.00793	7.41208	2.88988
ESCASTADCIN	15	del	1	0	1	0	1	0	0.217401	-2.20157	78196623	0.217401	2.78626	12.8162	7.41208	2.88988
ESCASTADCIN	16p	amp	1	0	1	0	1	0	0.544927	-0.875865	31196841	0.544927	0.955151	1.75281	1.70681	0.771299
ESCASTADCIN	16p	del	1	0	0.343912	-1.53989	0.343912	-1.53989	3.83164	1.93796	31196841	1.31775	1.29628	0.983708	1.70681	0.771299
ESCASTADCIN	16q	amp	1	0	1	0	1	0	0.536477	-0.898411	42872272	0.536477	0.886926	1.65324	1.70681	0.771299
ESCASTADCIN	16q	del	1	0	1	0	1	0	0.979654	-0.0296555	42872272	0.979654	2.38788	2.43747	1.70681	0.771299
ESCASTADCIN	17p	amp	1	0	1	0	1	0	0.787472	-0.344699	20318172	0.787472	1.0088	1.28106	7.4981	2.90653
ESCASTADCIN	17p	del	1	0	1	0	1	0	1.47651	0.562192	20318172	1.47651	24.2111	16.3975	7.4981	2.90653
ESCASTADCIN	17q	amp	1	0	1	0	1	0	0.736794	-0.440667	55646500	0.736794	8.57476	11.6379	7.4981	2.90653
ESCASTADCIN	17q	del	1	0	0.459949	-1.12045	0.459949	-1.12045	1.62246	0.698186	55646500	0.746251	0.504398	0.675909	7.4981	2.90653
ESCASTADCIN	18p	amp	1	0	1	0	1	0	2.72897	1.44835	14291122	2.72897	3.68637	1.35083	2.20287	1.13939
ESCASTADCIN	18p	del	1	0	1	0	1	0	1.53942	0.622384	14291122	1.53942	5.65244	3.67181	2.20287	1.13939
ESCASTADCIN	18q	amp	1	0	1	0	1	0	0.359469	-1.47606	58419494	0.359469	0.737275	2.05101	2.20287	1.13939
ESCASTADCIN	18q	del	15.3489	3.94006	0.207141	-2.27131	3.17938	1.66875	0.533747	-0.905773	58419494	1.69698	2.9491	1.73785	2.20287	1.13939
ESCASTADCIN	19p	amp	1	0	0.167516	-2.57763	0.167516	-2.57763	1.61124	0.68817	23768975	0.269907	0.477612	1.76954	3.67719	1.87861
ESCASTADCIN	19p	del	1	0	1	0	1	0	2.94502	1.55828	23768975	2.94502	13.1343	4.45985	3.67719	1.87861
ESCASTADCIN	19q	amp	1	0	1	0	1	0	1.37086	0.45508	30637733	1.37086	10.2687	7.49067	3.67719	1.87861
ESCASTADCIN	19q	del	1	0	1	0	1	0	1.20766	0.272216	30637733	1.20766	1.19403	0.988712	3.67719	1.87861
ESCASTADCIN	1p	amp	1	0	0.245613	-2.02554	0.245613	-2.02554	0.7329	-0.448312	117308752	0.18001	0.102207	0.567787	1.80247	0.849973
ESCASTADCIN	1p	del	1	0	1	0	1	0	0.630814	-0.664713	117308752	0.630814	1.4309	2.26834	1.80247	0.849973
ESCASTADCIN	1q	amp	1	0	1	0	1	0	0.469703	-1.09018	97934162	0.469703	1.976	4.20692	1.80247	0.849973
ESCASTADCIN	1q	del	1	0	1	0	1	0	0.204219	-2.29181	97934162	0.204219	0.034069	0.166826	1.80247	0.849973
ESCASTADCIN	20p	amp	1	0	1	0	1	0	0.776936	-0.364132	25742136	0.776936	2.46841	3.17711	5.32224	2.41203
ESCASTADCIN	20p	del	1	0	1	0	1	0	0.85463	-0.226628	25742136	0.85463	4.93682	5.77656	5.32224	2.41203
ESCASTADCIN	20q	amp	1	0	1	0	1	0	0.895729	-0.158866	32375865	0.895729	8.77657	9.79824	5.32224	2.41203
ESCASTADCIN	20q	del	1	0	1	0	1	0	0.21621	-2.20949	32375865	0.21621	0.548535	2.53704	5.32224	2.41203
ESCASTADCIN	21	amp	1	0	1	0	1	0	0.463949	-1.10796	32331154	0.463949	0.97735	2.10659	6.16178	2.62335
ESCASTADCIN	21	del	1	0	1	0	1	0	1.2372	0.307075	32331154	1.2372	12.6404	10.217	6.16178	2.62335
ESCASTADCIN	22	amp	1	0	1	0	1	0	0.438774	-1.18845	31907083	0.438774	1.77916	4.05485	6.16155	2.62329
ESCASTADCIN	22	del	1	0	1	0	1	0	1.03425	0.0485893	31907083	1.03425	8.55146	8.26825	6.16155	2.62329
ESCASTADCIN	2p	amp	1	0	1	0	1	0	0.360984	-1.46999	88646532	0.360984	0.644024	1.78408	4.0722	2.02581
ESCASTADCIN	2p	del	1	0	0.135237	-2.88643	0.135237	-2.88643	0.578984	-0.788405	88646532	0.0783003	0.80503	10.2813	4.0722	2.02581
ESCASTADCIN	2q	amp	1	0	1	0	1	0	0.197099	-2.34301	147134363	0.197099	0.483018	2.45064	4.0722	2.02581
ESCASTADCIN	2q	del	1	0	0.380808	-1.39286	0.380808	-1.39286	0.95399	-0.0679547	147134363	0.363287	0.644024	1.77277	4.0722	2.02581
ESCASTADCIN	3p	amp	1	0	1	0	1	0	0.260554	-1.94034	88273392	0.260554	0	0	10.7411	3.42507
ESCASTADCIN	3p	del	2.7991	1.48496	1	0	2.7991	1.48496	0.508641	-0.975281	88273392	1.42374	22.1627	15.5665	10.7411	3.42507
ESCASTADCIN	3q	amp	2.78717	1.4788	1	0	2.78717	1.4788	0.315446	-1.66453	103804007	0.879204	19.7001	22.4068	10.7411	3.42507
ESCASTADCIN	3q	del	1	0	0.0969892	-3.36603	0.0969892	-3.36603	0.635863	-0.653212	103804007	0.0616718	0.307815	4.99117	10.7411	3.42507
ESCASTADCIN	4p	amp	1	0	1	0	1	0	0.701905	-0.510652	47014893	0.701905	1.29592	1.84628	3.26781	1.70832
ESCASTADCIN	4p	del	1	0	1	0	1	0	1.02095	0.0299166	47014893	1.02095	3.88775	3.80796	3.26781	1.70832
ESCASTADCIN	4q	amp	1	0	1	0	1	0	0.146989	-2.76622	136064895	0.146989	0.215986	1.46941	3.26781	1.70832
ESCASTADCIN	4q	del	1	0	1	0	1	0	0.617352	-0.695834	136064895	0.617352	3.67176	5.94759	3.26781	1.70832
ESCASTADCIN	5p	amp	1	0	1	0	1	0	0.78715	-0.34529	44464224	0.78715	21.7007	27.5687	12.074	3.59383
ESCASTADCIN	5p	del	1	0	1	0	1	0	0.29237	-1.77413	44464224	0.29237	0.842744	2.88246	12.074	3.59383
ESCASTADCIN	5q	amp	1	0	0.460579	-1.11848	0.460579	-1.11848	0.34669	-1.52828	130235614	0.159678	0.210686	1.31944	12.074	3.59383
ESCASTADCIN	5q	del	6.73079	2.75078	1	0	6.73079	2.75078	0.143956	-2.7963	130235614	0.968938	16.0121	16.5255	12.074	3.59383
ESCASTADCIN	6p	amp	1	0	1	0	1	0	0.480494	-1.05741	56192205	0.480494	1.78996	3.72525	3.24719	1.69919
ESCASTADCIN	6p	del	1	0	0.214255	-2.2226	0.214255	-2.2226	2.06609	1.04691	56192205	0.442671	0.994422	2.24641	3.24719	1.69919
ESCASTADCIN	6q	amp	1	0	1	0	1	0	0.303673	-1.71941	108669387	0.303673	1.19331	3.92957	3.24719	1.69919
ESCASTADCIN	6q	del	1	0	1	0	1	0	0.644156	-0.634519	108669387	0.644156	1.98884	3.08752	3.24719	1.69919
ESCASTADCIN	7p	amp	3.67816	1.87898	1	0	3.67816	1.87898	0.759895	-0.396127	57230627	2.79502	0.965931	0.34559	2.15765	1.10946
ESCASTADCIN	7p	del	1	0	1	0	1	0	0.366936	-1.4464	57230627	0.366936	0.193186	0.526484	2.15765	1.10946
ESCASTADCIN	7q	amp	1	0	1	0	1	0	0.188931	-2.40407	95272854	0.188931	0.965931	5.11261	2.15765	1.10946
ESCASTADCIN	7q	del	1.32761	0.40883	0.503146	-0.990951	0.667981	-0.58212	1.42094	0.506846	95272854	0.949162	2.51142	2.64593	2.15765	1.10946
ESCASTADCIN	8p	amp	1	0	1	0	1	0	0.543533	-0.879559	42315706	0.543533	0.441738	0.812715	3.28612	1.71639
ESCASTADCIN	8p	del	5.10502	2.35192	1	0	5.10502	2.35192	0.803611	-0.315431	42315706	4.10245	11.0434	2.69192	3.28612	1.71639
ESCASTADCIN	8q	amp	3.21732	1.68586	1	0	3.21732	1.68586	0.398803	-1.32625	97771552	1.28308	12.3687	9.63985	3.28612	1.71639
ESCASTADCIN	8q	del	1	0	0.367738	-1.44325	0.367738	-1.44325	0.505187	-0.985109	97771552	0.185777	0	0	3.28612	1.71639
ESCASTADCIN	9p	amp	1	0	1	0	1	0	0.605937	-0.722761	37957757	0.605937	0.216776	0.357754	0.847068	-0.23945
ESCASTADCIN	9p	del	6.54851	2.71117	0.701555	-0.511372	4.59414	2.19979	0.620145	-0.689322	37957757	2.84903	1.79615	0.630441	0.847068	-0.23945
ESCASTADCIN	9q	amp	1	0	1	0	1	0	0.844066	-0.244571	69899709	0.844066	0.960009	1.13736	0.847068	-0.23945
ESCASTADCIN	9q	del	1	0	1	0	1	0	0.171675	-2.54225	69899709	0.171675	0.216776	1.26272	0.847068	-0.23945
ESCASTADGS	10p	amp	1	0	1	0	1	0	0.0517481	-4.27235	38648761	0.0517481	0.257469	4.97542	3.22373	1.68873
ESCASTADGS	10p	del	1	0	1	0	1	0	0.0776222	-3.68739	38648761	0.0776222	0	0	3.22373	1.68873
ESCASTADGS	10q	amp	1	0	1	0	1	0	0.0325108	-4.94294	92277118	0.0325108	0.257469	7.91949	3.22373	1.68873
ESCASTADGS	10q	del	1	0	1	0	1	0	0.0216738	-5.5279	92277118	0.0216738	0	0	3.22373	1.68873
ESCASTADGS	11p	amp	1	0	1	0	1	0	0.0201616	-5.63225	49599211	0.0201616	0	0	0	#NAME?
ESCASTADGS	11p	del	1	0	1	0	1	0	0.0806464	-3.63225	49599211	0.0806464	0	0	0	#NAME?
ESCASTADGS	11q	amp	1	0	1	0	1	0	0.0383982	-4.70282	78128733	0.0383982	0	0	0	#NAME?
ESCASTADGS	11q	del	1	0	1	0	1	0	0.0767963	-3.70282	78128733	0.0767963	0	0	0	#NAME?
ESCASTADGS	12p	amp	1	0	1	0	1	0	0.0919365	-3.44322	32631206	0.0919365	0.526089	5.72231	5.54888	2.4722
ESCASTADGS	12p	del	1	0	1	0	1	0	0.061291	-4.02818	32631206	0.061291	0	0	5.54888	2.4722
ESCASTADGS	12q	amp	1	0	1	0	1	0	0.0212907	-5.55363	93937781	0.0212907	0	0	5.54888	2.4722
ESCASTADGS	12q	del	1	0	1	0	1	0	0.0212907	-5.55363	93937781	0.0212907	0.350726	16.4732	5.54888	2.4722
ESCASTADGS	13	amp	1	0	1	0	1	0	0.0209344	-5.57798	95536653	0.0209344	0.616941	29.4702	31.9261	4.99666
ESCASTADGS	13	del	1	0	1	0	1	0	0.0104672	-6.57798	95536653	0.0104672	0.359882	34.3819	31.9261	4.99666
ESCASTADGS	14	amp	1	0	1	0	1	0	0.0116977	-6.41763	85486671	0.0116977	0.292663	25.0188	16.6792	4.05998
ESCASTADGS	14	del	1	0	1	0	1	0	0.0350932	-4.83267	85486671	0.0350932	0.292663	8.33961	16.6792	4.05998
ESCASTADGS	15	amp	1	0	1	0	1	0	0.0383648	-4.70407	78196623	0.0383648	0.126648	3.30115	13.2046	3.72297
ESCASTADGS	15	del	1	0	1	0	1	0	0.0127883	-6.28903	78196623	0.0127883	0.295512	23.1081	13.2046	3.72297
ESCASTADGS	16p	amp	1	0	1	0	1	0	0	#NAME?	31196841	0	0		0	#NAME?
ESCASTADGS	16p	del	1	0	1	0	1	0	0.0961636	-3.37837	31196841	0.0961636	0	0	0	#NAME?
ESCASTADGS	16q	amp	1	0	1	0	1	0	0.0466502	-4.42197	42872272	0.0466502	0	0	0	#NAME?
ESCASTADGS	16q	del	1	0	1	0	1	0	0.0233251	-5.42197	42872272	0.0233251	0	0	0	#NAME?
ESCASTADGS	17p	amp	1	0	1	0	1	0	0.049217	-4.3447	20318172	0.049217	0	0	0	#NAME?
ESCASTADGS	17p	del	1	0	1	0	1	0	0.246085	-2.02277	20318172	0.246085	0	0	0	#NAME?
ESCASTADGS	17q	amp	1	0	1	0	1	0	0.0718823	-3.79822	55646500	0.0718823	0	0	0	#NAME?
ESCASTADGS	17q	del	1	0	1	0	1	0	0.0359412	-4.79822	55646500	0.0359412	0	0	0	#NAME?
ESCASTADGS	18p	amp	1	0	1	0	1	0	0	#NAME?	14291122	0	0.245758	inf	inf	inf
ESCASTADGS	18p	del	1	0	1	0	1	0	0	#NAME?	14291122	0	0		inf	inf
ESCASTADGS	18q	amp	1	0	1	0	1	0	0	#NAME?	58419494	0	0		inf	inf
ESCASTADGS	18q	del	1	0	1	0	1	0	0.0684703	-3.86838	58419494	0.0684703	0	0	inf	inf
ESCASTADGS	19p	amp	1	0	1	0	1	0	0	#NAME?	23768975	0	0		0	#NAME?
ESCASTADGS	19p	del	1	0	1	0	1	0	0	#NAME?	23768975	0	0		0	#NAME?
ESCASTADGS	19q	amp	1	0	1	0	1	0	0.163197	-2.61531	30637733	0.163197	0	0	0	#NAME?
ESCASTADGS	19q	del	1	0	1	0	1	0	0	#NAME?	30637733	0	0		0	#NAME?
ESCASTADGS	1p	amp	1	0	1	0	1	0	0.0255735	-5.2892	117308752	0.0255735	0	0	0	#NAME?
ESCASTADGS	1p	del	1	0	1	0	1	0	0.0511471	-4.2892	117308752	0.0511471	0	0	0	#NAME?
ESCASTADGS	1q	amp	1	0	1	0	1	0	0.0306328	-5.02878	97934162	0.0306328	0	0	0	#NAME?
ESCASTADGS	1q	del	1	0	1	0	1	0	0.0102109	-6.61374	97934162	0.0102109	0	0	0	#NAME?
ESCASTADGS	20p	amp	1	0	1	0	1	0	0	#NAME?	25742136	0	0		inf	inf
ESCASTADGS	20p	del	1	0	1	0	1	0	0	#NAME?	25742136	0	0.548535	inf	inf	inf
ESCASTADGS	20q	amp	1	0	1	0	1	0	0.0308872	-5.01685	32375865	0.0308872	0	0	inf	inf
ESCASTADGS	20q	del	1	0	1	0	1	0	0.0308872	-5.01685	32375865	0.0308872	0	0	inf	inf
ESCASTADGS	21	amp	1	0	1	0	1	0	0.0309299	-5.01485	32331154	0.0309299	0.0651567	2.10659	inf	inf
ESCASTADGS	21	del	1	0	1	0	1	0	0	#NAME?	32331154	0	0.97735	inf	inf	inf
ESCASTADGS	22	amp	1	0	1	0	1	0	0	#NAME?	31907083	0	0.114785	inf	inf	inf
ESCASTADGS	22	del	1	0	1	0	1	0	0	#NAME?	31907083	0	0.459139	inf	inf	inf
ESCASTADGS	2p	amp	1	0	1	0	1	0	0	#NAME?	88646532	0	0		0	#NAME?
ESCASTADGS	2p	del	1	0	1	0	1	0	0	#NAME?	88646532	0	0		0	#NAME?
ESCASTADGS	2q	amp	1	0	1	0	1	0	0.00679651	-7.20099	147134363	0.00679651	0	0	0	#NAME?
ESCASTADGS	2q	del	1	0	1	0	1	0	0.0203895	-5.61603	147134363	0.0203895	0	0	0	#NAME?
ESCASTADGS	3p	amp	1	0	1	0	1	0	0	#NAME?	88273392	0	0		0	#NAME?
ESCASTADGS	3p	del	1	0	1	0	1	0	0.0566422	-4.14198	88273392	0.0566422	0	0	0	#NAME?
ESCASTADGS	3q	amp	1	0	1	0	1	0	0.0963354	-3.37579	103804007	0.0963354	0	0	0	#NAME?
ESCASTADGS	3q	del	1	0	1	0	1	0	0.0192671	-5.69772	103804007	0.0192671	0	0	0	#NAME?
ESCASTADGS	4p	amp	1	0	1	0	1	0	0.0212699	-5.55505	47014893	0.0212699	0	0	0	#NAME?
ESCASTADGS	4p	del	1	0	1	0	1	0	0.0638096	-3.97008	47014893	0.0638096	0	0	0	#NAME?
ESCASTADGS	4q	amp	1	0	1	0	1	0	0	#NAME?	136064895	0	0		0	#NAME?
ESCASTADGS	4q	del	1	0	1	0	1	0	0.0220483	-5.50319	136064895	0.0220483	0	0	0	#NAME?
ESCASTADGS	5p	amp	1	0	1	0	1	0	0.02249	-5.47457	44464224	0.02249	0	0	6.85971	2.77815
ESCASTADGS	5p	del	1	0	1	0	1	0	0.06747	-3.88961	44464224	0.06747	0	0	6.85971	2.77815
ESCASTADGS	5q	amp	1	0	1	0	1	0	0.0230352	-5.44002	130235614	0.0230352	0	0	6.85971	2.77815
ESCASTADGS	5q	del	1	0	1	0	1	0	0.00767839	-7.02498	130235614	0.00767839	0.210686	27.4388	6.85971	2.77815
ESCASTADGS	6p	amp	1	0	1	0	1	0	0.0177961	-5.8123	56192205	0.0177961	0	0	0	#NAME?
ESCASTADGS	6p	del	1	0	1	0	1	0	0.0355921	-4.8123	56192205	0.0355921	0	0	0	#NAME?
ESCASTADGS	6q	amp	1	0	1	0	1	0	0.00920222	-6.7638	108669387	0.00920222	0	0	0	#NAME?
ESCASTADGS	6q	del	1	0	1	0	1	0	0.0368089	-4.7638	108669387	0.0368089	0	0	0	#NAME?
ESCASTADGS	7p	amp	1	0	1	0	1	0	0.0349463	-4.83872	57230627	0.0349463	0.193186	5.52808	2.86522	1.51864
ESCASTADGS	7p	del	1	0	1	0	1	0	0.0524195	-4.25375	57230627	0.0524195	0	0	2.86522	1.51864
ESCASTADGS	7q	amp	1	0	1	0	1	0	0	#NAME?	95272854	0	0		2.86522	1.51864
ESCASTADGS	7q	del	1	0	1	0	1	0	0.062977	-3.98903	95272854	0.062977	0.193186	3.06757	2.86522	1.51864
ESCASTADGS	8p	amp	1	0	1	0	1	0	0.0472638	-4.40312	42315706	0.0472638	0	0	0	#NAME?
ESCASTADGS	8p	del	1	0	1	0	1	0	0.0472638	-4.40312	42315706	0.0472638	0	0	0	#NAME?
ESCASTADGS	8q	amp	1	0	1	0	1	0	0.0715955	-3.80399	97771552	0.0715955	0	0	0	#NAME?
ESCASTADGS	8q	del	1	0	1	0	1	0	0.0102279	-6.61134	97771552	0.0102279	0	0	0	#NAME?
ESCASTADGS	9p	amp	1	0	1	0	1	0	0.0263451	-5.24632	37957757	0.0263451	0	0	0	#NAME?
ESCASTADGS	9p	del	1	0	1	0	1	0	0.0790352	-3.66136	37957757	0.0790352	0	0	0	#NAME?
ESCASTADGS	9q	amp	1	0	1	0	1	0	0.0429186	-4.54225	69899709	0.0429186	0	0	0	#NAME?
ESCASTADGS	9q	del	1	0	1	0	1	0	0	#NAME?	69899709	0	0		0	#NAME?
GBM	10p	amp	21.7973	4.44608	1	0	21.7973	4.44608	0.0343501	-4.86354	38648761	0.748739	0.514937	0.68774	3.33108	1.73599
GBM	10p	del	1	0	1	0	1	0	0.413985	-1.27235	38648761	0.413985	3.08962	7.46313	3.33108	1.73599
GBM	10q	amp	1	0	1	0	1	0	0.0108369	-6.5279	92277118	0.0108369	0	0	3.33108	1.73599
GBM	10q	del	2.51576	1.33099	1	0	2.51576	1.33099	0.296735	-1.75276	92277118	0.746512	3.86203	5.17343	3.33108	1.73599
GBM	11p	amp	1	0	1	0	1	0	0.141131	-2.82489	49599211	0.141131	0	0	1.41337	0.499142
GBM	11p	del	1	0	1	0	1	0	0.685495	-0.544782	49599211	0.685495	1.67828	2.44828	1.41337	0.499142
GBM	11q	amp	1	0	1	0	1	0	0.230389	-2.11786	78128733	0.230389	0.335657	1.45691	1.41337	0.499142
GBM	11q	del	1	0	1	0	1	0	0.191991	-2.38089	78128733	0.191991	0.335657	1.7483	1.41337	0.499142
GBM	12p	amp	1	0	1	0	1	0	0.551619	-0.858255	32631206	0.551619	1.05218	1.90744	2.21285	1.14591
GBM	12p	del	1	0	1	0	1	0	0.367746	-1.44322	32631206	0.367746	0.350726	0.953718	2.21285	1.14591
GBM	12q	amp	1	0	1	0	1	0	0.0745174	-3.74628	93937781	0.0745174	0	0	2.21285	1.14591
GBM	12q	del	1	0	1	0	1	0	0.117099	-3.0942	93937781	0.117099	0.701452	5.99026	2.21285	1.14591
GBM	13	amp	1	0	1	0	1	0	0.198877	-2.33005	95536653	0.198877	0.205647	1.03404	12.0406	3.58984
GBM	13	del	1	0	1	0	1	0	0.272147	-1.87754	95536653	0.272147	6.27223	23.0472	12.0406	3.58984
GBM	14	amp	1	0	1	0	1	0	0.10528	-3.2477	85486671	0.10528	0.53655	5.09643	17.5334	4.13204
GBM	14	del	1	0	1	0	1	0	0.187164	-2.41763	85486671	0.187164	5.60938	29.9705	17.5334	4.13204
GBM	15	amp	1	0	1	0	1	0	0.179036	-2.48168	78196623	0.179036	0.970969	5.42332	11.2396	3.49052
GBM	15	del	1	0	1	0	1	0	0.153459	-2.70407	78196623	0.153459	2.61739	17.0559	11.2396	3.49052
GBM	16p	amp	1	0	1	0	1	0	0.256436	-1.96333	31196841	0.256436	0.477576	1.86236	1.23246	0.301543
GBM	16p	del	1	0	1	0	1	0	0.416709	-1.26289	31196841	0.416709	0.0682251	0.163724	1.23246	0.301543
GBM	16q	amp	1	0	1	0	1	0	0.139951	-2.83701	42872272	0.139951	0.0682251	0.487494	1.23246	0.301543
GBM	16q	del	1	0	1	0	1	0	0.536477	-0.898411	42872272	0.536477	1.29628	2.41628	1.23246	0.301543
GBM	17p	amp	1	0	1	0	1	0	0.295302	-1.75974	20318172	0.295302	0.504398	1.70807	1.84369	0.882595
GBM	17p	del	1	0	1	0	1	0	1.08277	0.114733	20318172	1.08277	2.26979	2.09627	1.84369	0.882595
GBM	17q	amp	1	0	1	0	1	0	0.413323	-1.27466	55646500	0.413323	0.756597	1.83052	1.84369	0.882595
GBM	17q	del	1	0	0.321155	-1.63866	0.321155	-1.63866	0.451344	-1.1477	55646500	0.144951	0.252199	1.73989	1.84369	0.882595
GBM	18p	amp	1	0	1	0	1	0	0.419841	-1.25208	14291122	0.419841	0.491517	1.17072	1.4954	0.580534
GBM	18p	del	1	0	1	0	1	0	1.60939	0.686515	14291122	1.60939	1.96607	1.22162	1.4954	0.580534
GBM	18q	amp	1	0	1	0	1	0	0.136941	-2.86838	58419494	0.136941	0.491517	3.58927	1.4954	0.580534
GBM	18q	del	1	0	1	0	1	0	0.410822	-1.28342	58419494	0.410822	0	0	1.4954	0.580534
GBM	19p	amp	1	0	1	0	1	0	1.13593	0.18388	23768975	1.13593	2.86567	2.52274	1.13702	0.185261
GBM	19p	del	1	0	1	0	1	0	0.294502	-1.76365	23768975	0.294502	0	0	1.13702	0.185261
GBM	19q	amp	1	0	0.520637	-0.941651	0.520637	-0.941651	1.40374	0.489279	30637733	0.73084	0.477612	0.653511	1.13702	0.185261
GBM	19q	del	1	0	1	0	1	0	1.5667	0.647725	30637733	1.5667	2.14925	1.37184	1.13702	0.185261
GBM	1p	amp	1	0	1	0	1	0	0.196064	-2.3506	117308752	0.196064	0.068138	0.34753	0.942967	-0.0847206
GBM	1p	del	1	0	0.0298688	-5.06522	0.0298688	-5.06522	1.90105	0.926797	117308752	0.0567821	0.068138	1.19999	0.942967	-0.0847206
GBM	1q	amp	1	0	1	0	1	0	0.153164	-2.70685	97934162	0.153164	0.34069	2.22435	0.942967	-0.0847206
GBM	1q	del	1	0	1	0	1	0	0.173586	-2.52628	97934162	0.173586	0	0	0.942967	-0.0847206
GBM	20p	amp	1	0	1	0	1	0	0.271928	-1.8787	25742136	0.271928	1.64561	6.05163	3.32889	1.73504
GBM	20p	del	1	0	1	0	1	0	0.194234	-2.36413	25742136	0.194234	0.548535	2.82409	3.32889	1.73504
GBM	20q	amp	1	0	1	0	1	0	0.308872	-1.69492	32375865	0.308872	1.37134	4.43983	3.32889	1.73504
GBM	20q	del	1	0	1	0	1	0	0.247098	-2.01685	32375865	0.247098	0	0	3.32889	1.73504
GBM	21	amp	1	0	1	0	1	0	0.247439	-2.01485	32331154	0.247439	3.9094	15.7994	10.3574	3.37259
GBM	21	del	1	0	1	0	1	0	0.278369	-1.84493	32331154	0.278369	1.36829	4.91538	10.3574	3.37259
GBM	22	amp	1	0	1	0	1	0	0.094023	-3.41084	31907083	0.094023	1.09045	11.5977	8.24637	3.04376
GBM	22	del	1	0	1	0	1	0	1.62973	0.704635	31907083	1.62973	7.97753	4.895	8.24637	3.04376
GBM	2p	amp	1	0	1	0	1	0	0.0789653	-3.66264	88646532	0.0789653	0.161006	2.03895	3.87732	1.95506
GBM	2p	del	1	0	0.0639751	-3.96635	0.0639751	-3.96635	0.630036	-0.666493	88646532	0.0403066	0.161006	3.99453	3.87732	1.95506
GBM	2q	amp	1	0	1	0	1	0	0.0339825	-4.87906	147134363	0.0339825	0.322012	9.47581	3.87732	1.95506
GBM	2q	del	1	0	0.0568565	-4.13653	0.0568565	-4.13653	0.797766	-0.325962	147134363	0.0453582	0	0	3.87732	1.95506
GBM	3p	amp	1	0	1	0	1	0	0.158598	-2.65655	88273392	0.158598	0.307815	1.94085	11.125	3.47574
GBM	3p	del	1	0	1	0	1	0	0.158598	-2.65655	88273392	0.158598	1.53907	9.70423	11.125	3.47574
GBM	3q	amp	1	0	1	0	1	0	0.221571	-2.17416	103804007	0.221571	1.23126	5.55694	11.125	3.47574
GBM	3q	del	1	0	0.0246683	-5.3412	0.0246683	-5.3412	0.914211	-0.1294	103804007	0.022552	0.615629	27.2982	11.125	3.47574
GBM	4p	amp	1	0	1	0	1	0	0.127619	-2.97008	47014893	0.127619	0.647958	5.07728	2.97015	1.57054
GBM	4p	del	1	0	1	0	1	0	0.319048	-1.64816	47014893	0.319048	1.94387	6.09273	2.97015	1.57054
GBM	4q	amp	1	0	1	0	1	0	0.0220483	-5.50319	136064895	0.0220483	0	0	2.97015	1.57054
GBM	4q	del	1	0	0.467955	-1.09556	0.467955	-1.09556	0.64952	-0.622553	136064895	0.303946	0.215986	0.710606	2.97015	1.57054
GBM	5p	amp	1	0	1	0	1	0	0.31486	-1.66722	44464224	0.31486	0.210686	0.669142	2.68086	1.4227
GBM	5p	del	1	0	1	0	1	0	0.26988	-1.88961	44464224	0.26988	0.421372	1.56133	2.68086	1.4227
GBM	5q	amp	1	0	1	0	1	0	0.0921407	-3.44002	130235614	0.0921407	0.421372	4.57314	2.68086	1.4227
GBM	5q	del	1	0	1	0	1	0	0.161246	-2.63266	130235614	0.161246	0.632058	3.91983	2.68086	1.4227
GBM	6p	amp	1	0	1	0	1	0	0.160165	-2.64237	56192205	0.160165	0	0	1.15021	0.201897
GBM	6p	del	1	0	1	0	1	0	0.391513	-1.35287	56192205	0.391513	0.198884	0.507989	1.15021	0.201897
GBM	6q	amp	1	0	1	0	1	0	0.0736178	-3.7638	108669387	0.0736178	0.198884	2.70158	1.15021	0.201897
GBM	6q	del	3.51926	1.81527	1	0	3.51926	1.81527	0.406198	-1.29974	108669387	1.42952	1.98884	1.39127	1.15021	0.201897
GBM	7p	amp	4.8304	2.27214	1	0	4.8304	2.27214	0.25212	-1.98782	57230627	1.21784	0.193186	0.15863	4.64101	2.21444
GBM	7p	del	1	0	1	0	1	0	0.0524195	-4.25375	57230627	0.0524195	0	0	4.64101	2.21444
GBM	7q	amp	1	0	1	0	1	0	0.199427	-2.32607	95272854	0.199427	3.67054	18.4054	4.64101	2.21444
GBM	7q	del	1	0	1	0	1	0	0.062977	-3.98903	95272854	0.062977	0	0	4.64101	2.21444
GBM	8p	amp	1	0	1	0	1	0	0.212687	-2.2332	42315706	0.212687	0	0	1.98371	0.9882
GBM	8p	del	1	0	1	0	1	0	0.449006	-1.15519	42315706	0.449006	1.32521	2.95144	1.98371	0.9882
GBM	8q	amp	1	0	1	0	1	0	0.132963	-2.9109	97771552	0.132963	0.662607	4.98339	1.98371	0.9882
GBM	8q	del	1	0	1	0	1	0	0.102279	-3.28941	97771552	0.102279	0	0	1.98371	0.9882
GBM	9p	amp	1	0	1	0	1	0	0.447866	-1.15886	37957757	0.447866	0.030968	0.0691457	0.975654	-0.0355589
GBM	9p	del	8.39407	3.06937	1	0	8.39407	3.06937	0.518545	-0.947458	37957757	4.35271	2.38454	0.547829	0.975654	-0.0355589
GBM	9q	amp	1	0	1	0	1	0	0.30043	-1.7349	69899709	0.30043	0.743233	2.47389	0.975654	-0.0355589
GBM	9q	del	1	0	1	0	1	0	0.11445	-3.12721	69899709	0.11445	0.0929041	0.811746	0.975654	-0.0355589
GBMLGG	10p	amp	10.2753	3.36111	1	0	10.2753	3.36111	0.410151	-1.28577	38648761	4.21443	4.37697	1.03857	2.73851	1.45339
GBMLGG	10p	del	1	0	1	0	1	0	0.620977	-0.687388	38648761	0.620977	3.34709	5.39004	2.73851	1.45339
GBMLGG	10q	amp	1	0	1	0	1	0	0.0325108	-4.94294	92277118	0.0325108	0	0	2.73851	1.45339
GBMLGG	10q	del	1	0	1	0	1	0	1.13788	0.186344	92277118	1.13788	5.14937	4.52542	2.73851	1.45339
GBMLGG	11p	amp	1	0	1	0	1	0	0.282263	-1.82489	49599211	0.282263	0	0	1.62339	0.699009
GBMLGG	11p	del	1.66062	0.731718	0.310925	-1.68536	0.516326	-0.953645	2.52957	1.33889	49599211	1.30609	4.36354	3.34093	1.62339	0.699009
GBMLGG	11q	amp	1	0	1	0	1	0	0.742365	-0.4298	78128733	0.742365	1.1748	1.58251	1.62339	0.699009
GBMLGG	11q	del	1	0	0.210916	-2.24526	0.210916	-2.24526	1.52035	0.604404	78128733	0.320667	0.503485	1.57012	1.62339	0.699009
GBMLGG	12p	amp	1	0	1	0	1	0	1.62421	0.69974	32631206	1.62421	2.10436	1.29562	1.26898	0.34367
GBMLGG	12p	del	1	0	1	0	1	0	0.704847	-0.504618	32631206	0.704847	0.350726	0.497592	1.26898	0.34367
GBMLGG	12q	amp	1	0	0.318351	-1.65131	0.318351	-1.65131	0.473103	-1.07978	93937781	0.150613	0	0	1.26898	0.34367
GBMLGG	12q	del	26.5444	4.73034	0.068207	-3.87394	1.81051	0.8564	0.236044	-2.08287	93937781	0.427361	1.4029	3.28272	1.26898	0.34367
GBMLGG	13	amp	1	0	0.305409	-1.71119	0.305409	-1.71119	0.550999	-0.859878	95536653	0.16828	0.257059	1.52756	6.78384	2.7621
GBMLGG	13	del	3.08091	1.62336	1	0	3.08091	1.62336	0.248088	-2.01107	95536653	0.764337	9.2027	12.0401	6.78384	2.7621
GBMLGG	14	amp	1	0	1	0	1	0	0.163768	-2.61027	85486671	0.163768	0.731659	4.46765	16.6383	4.05644
GBMLGG	14	del	9.03839	3.17607	0.129344	-2.95071	1.16906	0.225351	0.233173	-2.10053	85486671	0.272593	7.85313	28.809	16.6383	4.05644
GBMLGG	15	amp	1	0	1	0	1	0	0.345283	-1.53415	78196623	0.345283	1.18205	3.42342	9.38688	3.23065
GBMLGG	15	del	1	0	1	0	1	0	0.255766	-1.96711	78196623	0.255766	3.92609	15.3504	9.38688	3.23065
GBMLGG	16p	amp	1	0	1	0	1	0	0.416709	-1.26289	31196841	0.416709	0.614026	1.47351	1.29545	0.373456
GBMLGG	16p	del	1	0	1	0	1	0	0.480818	-1.05644	31196841	0.480818	0.0682251	0.141894	1.29545	0.373456
GBMLGG	16q	amp	1	0	1	0	1	0	0.209926	-2.25205	42872272	0.209926	0.409351	1.94998	1.29545	0.373456
GBMLGG	16q	del	1	0	1	0	1	0	0.886354	-0.174045	42872272	0.886354	1.43273	1.61643	1.29545	0.373456
GBMLGG	17p	amp	1	0	1	0	1	0	0.442953	-1.17477	20318172	0.442953	0.756597	1.70807	3.85005	1.94488
GBMLGG	17p	del	1	0	1	0	1	0	1.18121	0.240264	20318172	1.18121	2.26979	1.92158	3.85005	1.94488
GBMLGG	17q	amp	1.78833	0.838614	1	0	1.78833	0.838614	0.637667	-0.649124	55646500	1.14036	0.756597	0.663472	3.85005	1.94488
GBMLGG	17q	del	1	0	0.0169411	-5.88333	0.0169411	-5.88333	1.3403	0.422553	55646500	0.0227062	0.252199	11.1071	3.85005	1.94488
GBMLGG	18p	amp	1	0	1	0	1	0	0.769709	-0.377616	14291122	0.769709	0.737275	0.957862	1.17914	0.237731
GBMLGG	18p	del	1	0	1	0	1	0	2.51905	1.33288	14291122	2.51905	3.44062	1.36584	1.17914	0.237731
GBMLGG	18q	amp	1	0	1	0	1	0	0.205411	-2.28342	58419494	0.205411	0.491517	2.39285	1.17914	0.237731
GBMLGG	18q	del	1	0	1	0	1	0	0.736056	-0.442113	58419494	0.736056	0	0	1.17914	0.237731
GBMLGG	19p	amp	1	0	1	0	1	0	1.76701	0.82131	23768975	1.76701	6.92537	3.91926	4.86472	2.28236
GBMLGG	19p	del	1	0	1	0	1	0	0.546931	-0.870568	23768975	0.546931	0	0	4.86472	2.28236
GBMLGG	19q	amp	1	0	0.538713	-0.892411	0.538713	-0.892411	1.6033	0.681047	30637733	0.86372	0.477612	0.55297	4.86472	2.28236
GBMLGG	19q	del	1.45565	0.541662	0.456566	-1.13111	0.664599	-0.589443	4.17186	2.06069	30637733	2.77261	41.5522	14.9867	4.86472	2.28236
GBMLGG	1p	amp	1	0	1	0	1	0	0.204588	-2.2892	117308752	0.204588	0.068138	0.333049	10.7854	3.43101
GBMLGG	1p	del	1	0	0.0616425	-4.01993	0.0616425	-4.01993	2.34158	1.22748	117308752	0.144341	5.62139	38.9453	10.7854	3.43101
GBMLGG	1q	amp	1	0	1	0	1	0	0.194008	-2.36581	97934162	0.194008	0.749518	3.86334	10.7854	3.43101
GBMLGG	1q	del	1	0	0.219811	-2.18566	0.219811	-2.18566	0.704421	-0.505491	97934162	0.15484	0	0	10.7854	3.43101
GBMLGG	20p	amp	1	0	1	0	1	0	0.466162	-1.1011	25742136	0.466162	2.46841	5.29518	2.92254	1.54722
GBMLGG	20p	del	1	0	1	0	1	0	0.466162	-1.1011	25742136	0.466162	1.37134	2.94177	2.92254	1.54722
GBMLGG	20q	amp	1	0	1	0	1	0	0.55597	-0.846922	32375865	0.55597	1.91987	3.4532	2.92254	1.54722
GBMLGG	20q	del	1	0	0.365004	-1.45402	0.365004	-1.45402	1.11988	0.16334	32375865	0.408759	0	0	2.92254	1.54722
GBMLGG	21	amp	1	0	1	0	1	0	0.340229	-1.55542	32331154	0.340229	5.14738	15.1292	10.3295	3.3687
GBMLGG	21	del	1	0	1	0	1	0	0.494879	-1.01485	32331154	0.494879	2.73658	5.5298	10.3295	3.3687
GBMLGG	22	amp	1	0	1	0	1	0	0.219387	-2.18845	31907083	0.219387	1.95134	8.89451	6.45455	2.69032
GBMLGG	22	del	1	0	1	0	1	0	2.4446	1.2896	31907083	2.4446	9.81409	4.0146	6.45455	2.69032
GBMLGG	2p	amp	1	0	1	0	1	0	0.180492	-2.46999	88646532	0.180492	0.483018	2.67612	2.34429	1.22915
GBMLGG	2p	del	1	0	0.213546	-2.22738	0.213546	-2.22738	0.968279	-0.0465058	88646532	0.206772	0.161006	0.778666	2.34429	1.22915
GBMLGG	2q	amp	1	0	1	0	1	0	0.0543721	-4.20099	147134363	0.0543721	0.322012	5.92238	2.34429	1.22915
GBMLGG	2q	del	1	0	0.0570818	-4.13083	0.0570818	-4.13083	2.40628	1.2668	147134363	0.137355	0	0	2.34429	1.22915
GBMLGG	3p	amp	1	0	1	0	1	0	0.373839	-1.41951	88273392	0.373839	0.307815	0.823389	6.20409	2.63322
GBMLGG	3p	del	1	0	1	0	1	0	0.294539	-1.76347	88273392	0.294539	2.46252	8.36057	6.20409	2.63322
GBMLGG	3q	amp	1	0	1	0	1	0	0.269739	-1.89036	103804007	0.269739	1.53907	5.70579	6.20409	2.63322
GBMLGG	3q	del	2.55237	1.35184	0.0350846	-4.83302	0.0895488	-3.48118	1.38512	0.470014	103804007	0.124036	1.23126	9.92661	6.20409	2.63322
GBMLGG	4p	amp	1	0	1	0	1	0	0.191429	-2.38512	47014893	0.191429	0.863944	4.51314	4.05605	2.02007
GBMLGG	4p	del	1	0	1	0	1	0	0.489207	-1.03148	47014893	0.489207	3.0238	6.18104	4.05605	2.02007
GBMLGG	4q	amp	1	0	1	0	1	0	0.0440966	-4.50319	136064895	0.0440966	0.215986	4.89802	4.05605	2.02007
GBMLGG	4q	del	1	0	1	0	1	0	0.683497	-0.548992	136064895	0.683497	0.431972	0.632002	4.05605	2.02007
GBMLGG	5p	amp	1	0	0.25843	-1.95216	0.25843	-1.95216	1.17564	0.233444	44464224	0.30382	0.842744	2.77383	4.36368	2.12554
GBMLGG	5p	del	1	0	1	0	1	0	0.80964	-0.304648	44464224	0.80964	1.68549	2.08178	4.36368	2.12554
GBMLGG	5q	amp	1	0	0.123512	-3.01727	0.123512	-3.01727	0.386231	-1.37246	130235614	0.0477044	0.421372	8.83299	4.36368	2.12554
GBMLGG	5q	del	1	0	1	0	1	0	0.391598	-1.35255	130235614	0.391598	1.4748	3.76611	4.36368	2.12554
GBMLGG	6p	amp	1	0	1	0	1	0	0.302533	-1.72484	56192205	0.302533	0.198884	0.657397	1.04842	0.0682136
GBMLGG	6p	del	1	0	0.290516	-1.78331	0.290516	-1.78331	1.19167	0.252986	56192205	0.3462	0.198884	0.574478	1.04842	0.0682136
GBMLGG	6q	amp	1	0	1	0	1	0	0.110427	-3.17884	108669387	0.110427	0.198884	1.80105	1.04842	0.0682136
GBMLGG	6q	del	3.5591	1.83151	1	0	3.5591	1.83151	0.722131	-0.469668	108669387	2.57014	2.98327	1.16074	1.04842	0.0682136
GBMLGG	7p	amp	5.0165	2.32668	1	0	5.0165	2.32668	0.32088	-1.6399	57230627	1.60969	0.193186	0.120014	0.841643	-0.24872
GBMLGG	7p	del	1	0	0.210007	-2.25149	0.210007	-2.25149	0.561125	-0.833606	57230627	0.11784	0	0	0.841643	-0.24872
GBMLGG	7q	amp	3.88778	1.95895	1	0	3.88778	1.95895	0.35203	-1.50623	95272854	1.36861	4.44328	3.24656	0.841643	-0.24872
GBMLGG	7q	del	1	0	0.364986	-1.45409	0.364986	-1.45409	0.376813	-1.40808	95272854	0.137531	0	0	0.841643	-0.24872
GBMLGG	8p	amp	1	0	1	0	1	0	0.354478	-1.49623	42315706	0.354478	0.220869	0.623082	1.09845	0.135472
GBMLGG	8p	del	1	0	1	0	1	0	0.708957	-0.496231	42315706	0.708957	1.54608	2.18079	1.09845	0.135472
GBMLGG	8q	amp	1.47281	0.55857	1	0	1.47281	0.55857	0.565924	-0.821319	97771552	0.833498	1.32521	1.58994	1.09845	0.135472
GBMLGG	8q	del	1	0	0.0693528	-3.8499	0.0693528	-3.8499	1.24337	0.314255	97771552	0.0862312	0	0	1.09845	0.135472
GBMLGG	9p	amp	1	0	1	0	1	0	0.579592	-0.786891	37957757	0.579592	0.030968	0.0534308	0.834383	-0.261218
GBMLGG	9p	del	7.82626	2.96832	0.530085	-0.915706	4.14858	2.05262	1.19265	0.254176	37957757	4.94782	3.15874	0.63841	0.834383	-0.261218
GBMLGG	9q	amp	1	0	1	0	1	0	0.515024	-0.95729	69899709	0.515024	1.08388	2.10453	0.834383	-0.261218
GBMLGG	9q	del	1	0	1	0	1	0	0.171675	-2.54225	69899709	0.171675	0.0929041	0.541164	0.834383	-0.261218
HNSC	10p	amp	1	0	1	0	1	0	0.336363	-1.57191	38648761	0.336363	2.05975	6.12359	5.37514	2.4263
HNSC	10p	del	1	0	1	0	1	0	1.75944	0.815113	38648761	1.75944	5.92178	3.36573	5.37514	2.4263
HNSC	10q	amp	1	0	1	0	1	0	0.162554	-2.62101	92277118	0.162554	0.772406	4.75169	5.37514	2.4263
HNSC	10q	del	1	0	1	0	1	0	0.390129	-1.35798	92277118	0.390129	2.83215	7.25953	5.37514	2.4263
HNSC	11p	amp	1	0	1	0	1	0	0.221778	-2.17281	49599211	0.221778	1.00697	4.54045	3.928	1.9738
HNSC	11p	del	1	0	1	0	1	0	1.37099	0.455218	49599211	1.37099	5.87399	4.28449	3.928	1.9738
HNSC	11q	amp	1	0	1	0	1	0	0.281587	-1.82835	78128733	0.281587	1.84611	6.55611	3.928	1.9738
HNSC	11q	del	15.4036	3.9452	0.114012	-3.13274	1.7562	0.812456	0.866256	-0.207135	78128733	1.52132	0.503485	0.330953	3.928	1.9738
HNSC	12p	amp	1	0	1	0	1	0	0.858074	-0.220825	32631206	0.858074	8.76815	10.2184	4.8009	2.2633
HNSC	12p	del	1	0	1	0	1	0	0.490328	-1.02818	32631206	0.490328	1.05218	2.14586	4.8009	2.2633
HNSC	12q	amp	1	0	1	0	1	0	0.149035	-2.74628	93937781	0.149035	0.175363	1.17666	4.8009	2.2633
HNSC	12q	del	1	0	1	0	1	0	0.340651	-1.55363	93937781	0.340651	1.92899	5.66267	4.8009	2.2633
HNSC	13	amp	1	0	1	0	1	0	0.6699	-0.577982	95536653	0.6699	1.38812	2.07213	14.3831	3.8463
HNSC	13	del	1	0	1	0	1	0	0.240745	-2.05442	95536653	0.240745	6.42647	26.6941	14.3831	3.8463
HNSC	14	amp	1	0	1	0	1	0	0.549793	-0.863039	85486671	0.549793	5.41427	9.84783	6.64089	2.73138
HNSC	14	del	1	0	1	0	1	0	0.397723	-1.33016	85486671	0.397723	1.36576	3.43396	6.64089	2.73138
HNSC	15	amp	1	0	1	0	1	0	0.485954	-1.04111	78196623	0.485954	2.02637	4.16988	6.69279	2.74261
HNSC	15	del	1	0	1	0	1	0	0.306919	-1.70407	78196623	0.306919	2.82847	9.21571	6.69279	2.74261
HNSC	16p	amp	1	0	1	0	1	0	0.512872	-0.963328	31196841	0.512872	0.955151	1.86236	1.94358	0.958713
HNSC	16p	del	1	0	1	0	1	0	0.897527	-0.155973	31196841	0.897527	0.477576	0.532102	1.94358	0.958713
HNSC	16q	amp	1	0	1	0	1	0	0.559802	-0.83701	42872272	0.559802	1.02338	1.8281	1.94358	0.958713
HNSC	16q	del	1	0	1	0	1	0	0.653103	-0.614618	42872272	0.653103	2.31965	3.55174	1.94358	0.958713
HNSC	17p	amp	1	0	1	0	1	0	0.49217	-1.02277	20318172	0.49217	1.76539	3.58695	4.69748	2.23189
HNSC	17p	del	1	0	1	0	1	0	2.0179	1.01285	20318172	2.0179	8.82696	4.37434	4.69748	2.23189
HNSC	17q	amp	1	0	1	0	1	0	0.772735	-0.371954	55646500	0.772735	5.29618	6.85381	4.69748	2.23189
HNSC	17q	del	1	0	0.106207	-3.23505	0.106207	-3.23505	2.38962	1.25678	55646500	0.253795	1.0088	3.97484	4.69748	2.23189
HNSC	18p	amp	1	0	1	0	1	0	2.44907	1.29224	14291122	2.44907	12.2879	5.01737	4.09323	2.03324
HNSC	18p	del	1	0	1	0	1	0	1.18955	0.250416	14291122	1.18955	3.68637	3.09897	4.09323	2.03324
HNSC	18q	amp	1	0	1	0	1	0	0.102705	-3.28342	58419494	0.102705	0.737275	7.17854	4.09323	2.03324
HNSC	18q	del	5.17467	2.37147	1	0	5.17467	2.37147	1.10136	0.139284	58419494	5.69917	6.14396	1.07804	4.09323	2.03324
HNSC	19p	amp	1	0	1	0	1	0	0.294502	-1.76365	23768975	0.294502	0.716418	2.43265	3.51663	1.8142
HNSC	19p	del	1	0	0.273355	-1.87115	0.273355	-1.87115	5.3913	2.43063	23768975	1.47374	5.01492	3.40286	3.51663	1.8142
HNSC	19q	amp	1	0	1	0	1	0	0.979185	-0.0303471	30637733	0.979185	3.58209	3.65824	3.51663	1.8142
HNSC	19q	del	1	0	1	0	1	0	0.783348	-0.352275	30637733	0.783348	3.58209	4.57279	3.51663	1.8142
HNSC	1p	amp	1	0	1	0	1	0	0.26426	-1.91997	117308752	0.26426	0.068138	0.257845	2.17138	1.11861
HNSC	1p	del	3.10659	1.63533	0.174025	-2.52263	0.540626	-0.887297	0.454859	-1.13651	117308752	0.245909	0.919863	3.74067	2.17138	1.11861
HNSC	1q	amp	1	0	1	0	1	0	0.42886	-1.22142	97934162	0.42886	1.80566	4.21037	2.17138	1.11861
HNSC	1q	del	1	0	1	0	1	0	0.142953	-2.80639	97934162	0.142953	0.068138	0.476646	2.17138	1.11861
HNSC	20p	amp	1	0	1	0	1	0	0.543855	-0.878705	25742136	0.543855	3.29121	6.05163	6.59534	2.72145
HNSC	20p	del	1	0	1	0	1	0	0.815783	-0.293742	25742136	0.815783	4.93682	6.05163	6.59534	2.72145
HNSC	20q	amp	1	0	1	0	1	0	0.494195	-1.01685	32375865	0.494195	6.85669	13.8745	6.59534	2.72145
HNSC	20q	del	1	0	1	0	1	0	0.679519	-0.557415	32375865	0.679519	0.274268	0.403621	6.59534	2.72145
HNSC	21	amp	1	0	1	0	1	0	0.402089	-1.31441	32331154	0.402089	1.69407	4.21318	5.16321	2.36827
HNSC	21	del	1	0	1	0	1	0	1.57743	0.657572	32331154	1.57743	9.64319	6.11324	5.16321	2.36827
HNSC	22	amp	1	0	1	0	1	0	0.595479	-0.747877	31907083	0.595479	4.70617	7.90317	5.59968	2.48535
HNSC	22	del	1	0	1	0	1	0	0.94023	-0.0889142	31907083	0.94023	3.09919	3.2962	5.59968	2.48535
HNSC	2p	amp	2.17684	1.12224	1	0	2.17684	1.12224	0.296761	-1.75263	88646532	0.646001	1.44905	2.24312	2.29196	1.19658
HNSC	2p	del	1	0	1	0	1	0	0.338423	-1.5631	88646532	0.338423	0.644024	1.90302	2.29196	1.19658
HNSC	2q	amp	1	0	1	0	1	0	0.0951511	-3.39364	147134363	0.0951511	0.161006	1.69211	2.29196	1.19658
HNSC	2q	del	5.45417	2.44736	0.0700996	-3.83445	0.382335	-1.38709	0.885331	-0.175712	147134363	0.338493	1.12704	3.32959	2.29196	1.19658
HNSC	3p	amp	1	0	1	0	1	0	0.181255	-2.46391	88273392	0.181255	0	0	13.3658	3.74047
HNSC	3p	del	18.6566	4.22162	1	0	18.6566	4.22162	0.241517	-2.0498	88273392	4.5059	59.4082	13.1845	13.3658	3.74047
HNSC	3q	amp	6.53568	2.70834	1	0	6.53568	2.70834	0.321707	-1.63618	103804007	2.10257	51.0972	24.3023	13.3658	3.74047
HNSC	3q	del	1	0	1	0	1	0	0.0192671	-5.69772	103804007	0.0192671	0.307815	15.9762	13.3658	3.74047
HNSC	4p	amp	1	0	1	0	1	0	0.276508	-1.85461	47014893	0.276508	1.94387	7.03008	8.396	3.0697
HNSC	4p	del	1	0	1	0	1	0	1.40381	0.489348	47014893	1.40381	9.50338	6.76971	8.396	3.0697
HNSC	4q	amp	1	0	0.261279	-1.93634	0.261279	-1.93634	0.320025	-1.64374	136064895	0.0836157	1.29592	15.4985	8.396	3.0697
HNSC	4q	del	1	0	1	0	1	0	0.705546	-0.503189	136064895	0.705546	3.0238	4.28577	8.396	3.0697
HNSC	5p	amp	4.14067	2.04986	1	0	4.14067	2.04986	0.372358	-1.42524	44464224	1.54181	28.4426	18.4475	8.80049	3.13758
HNSC	5p	del	1	0	1	0	1	0	0.20241	-2.30465	44464224	0.20241	0	0	8.80049	3.13758
HNSC	5q	amp	1	0	1	0	1	0	0.107497	-3.21763	130235614	0.107497	0	0	8.80049	3.13758
HNSC	5q	del	3.43277	1.77937	1	0	3.43277	1.77937	0.355331	-1.49277	130235614	1.21977	20.4365	16.7544	8.80049	3.13758
HNSC	6p	amp	1	0	1	0	1	0	0.480494	-1.05741	56192205	0.480494	1.78996	3.72525	3.97485	1.9909
HNSC	6p	del	1	0	1	0	1	0	0.747435	-0.419981	56192205	0.747435	1.19331	1.59654	3.97485	1.9909
HNSC	6q	amp	1	0	1	0	1	0	0.193247	-2.37148	108669387	0.193247	1.19331	6.17504	3.97485	1.9909
HNSC	6q	del	1	0	1	0	1	0	0.49692	-1.00891	108669387	0.49692	2.18773	4.40258	3.97485	1.9909
HNSC	7p	amp	5.47348	2.45246	1	0	5.47348	2.45246	0.56694	-0.818733	57230627	3.10313	2.51142	0.809318	4.2363	2.08281
HNSC	7p	del	1	0	1	0	1	0	0.297044	-1.75125	57230627	0.297044	0	0	4.2363	2.08281
HNSC	7q	amp	1	0	1	0	1	0	0.167939	-2.57399	95272854	0.167939	1.3523	8.05236	4.2363	2.08281
HNSC	7q	del	3.07356	1.61991	0.147385	-2.76233	0.452997	-1.14243	0.791353	-0.337606	95272854	0.358481	2.89779	8.08353	4.2363	2.08281
HNSC	8p	amp	1	0	1	0	1	0	0.236319	-2.08119	42315706	0.236319	0.662607	2.80387	10.9686	3.45531
HNSC	8p	del	4.16385	2.05792	0.423828	-1.23845	1.76476	0.819468	1.25436	0.32695	42315706	2.21364	27.3877	12.3723	10.9686	3.45531
HNSC	8q	amp	3.6978	1.88667	1	0	3.6978	1.88667	0.322603	-1.63217	97771552	1.19292	34.2347	28.6982	10.9686	3.45531
HNSC	8q	del	1	0	1	0	1	0	0.0102279	-6.61134	97771552	0.0102279	0	0	10.9686	3.45531
HNSC	9p	amp	1	0	1	0	1	0	1.02746	0.0390794	37957757	1.02746	0.278712	0.271264	1.30907	0.388547
HNSC	9p	del	1	0	1	0	1	0	1.52801	0.611658	37957757	1.52801	2.35357	1.54028	1.30907	0.388547
HNSC	9q	amp	1	0	1	0	1	0	0.600861	-0.734897	69899709	0.600861	1.61034	2.68005	1.30907	0.388547
HNSC	9q	del	1	0	0.151238	-2.72511	0.151238	-2.72511	0.824886	-0.277733	69899709	0.124754	0.0929041	0.7447	1.30907	0.388547
KICH	10p	amp	1	0	1	0	1	0	0.0258741	-5.27235	38648761	0.0258741	0	0	inf	inf
KICH	10p	del	1	0	1	0	1	0	0	#NAME?	38648761	0	0.257469	inf	inf	inf
KICH	10q	amp	1	0	1	0	1	0	0	#NAME?	92277118	0	0		inf	inf
KICH	10q	del	1	0	1	0	1	0	0.0108369	-6.5279	92277118	0.0108369	0.257469	23.7585	inf	inf
KICH	11p	amp	1	0	1	0	1	0	0	#NAME?	49599211	0	0		0	#NAME?
KICH	11p	del	1	0	1	0	1	0	0.0806464	-3.63225	49599211	0.0806464	0	0	0	#NAME?
KICH	11q	amp	1	0	1	0	1	0	0	#NAME?	78128733	0	0		0	#NAME?
KICH	11q	del	1	0	1	0	1	0	0.0255988	-5.28778	78128733	0.0255988	0	0	0	#NAME?
KICH	12p	amp	1	0	1	0	1	0	0.061291	-4.02818	32631206	0.061291	0	0	0	#NAME?
KICH	12p	del	1	0	1	0	1	0	0.061291	-4.02818	32631206	0.061291	0	0	0	#NAME?
KICH	12q	amp	1	0	1	0	1	0	0.0106453	-6.55363	93937781	0.0106453	0	0	0	#NAME?
KICH	12q	del	1	0	1	0	1	0	0	#NAME?	93937781	0	0		0	#NAME?
KICH	13	amp	1	0	1	0	1	0	0	#NAME?	95536653	0	0.359882	inf	inf	inf
KICH	13	del	1	0	1	0	1	0	0	#NAME?	95536653	0	2.36494	inf	inf	inf
KICH	14	amp	1	0	1	0	1	0	0.0116977	-6.41763	85486671	0.0116977	2.48764	212.66	110.5	6.7879
KICH	14	del	1	0	1	0	1	0	0.0116977	-6.41763	85486671	0.0116977	0.0975545	8.33961	110.5	6.7879
KICH	15	amp	1	0	1	0	1	0	0	#NAME?	78196623	0	2.1108	inf	inf	inf
KICH	15	del	1	0	1	0	1	0	0	#NAME?	78196623	0	0.126648	inf	inf	inf
KICH	16p	amp	1	0	1	0	1	0	0	#NAME?	31196841	0	0.0682251	inf	inf	inf
KICH	16p	del	1	0	1	0	1	0	0	#NAME?	31196841	0	0		inf	inf
KICH	16q	amp	1	0	1	0	1	0	0	#NAME?	42872272	0	0		inf	inf
KICH	16q	del	1	0	1	0	1	0	0	#NAME?	42872272	0	0.13645	inf	inf	inf
KICH	17p	amp	1	0	1	0	1	0	0	#NAME?	20318172	0	0		0	#NAME?
KICH	17p	del	1	0	1	0	1	0	0	#NAME?	20318172	0	0		0	#NAME?
KICH	17q	amp	1	0	1	0	1	0	0.0359412	-4.79822	55646500	0.0359412	0	0	0	#NAME?
KICH	17q	del	1	0	1	0	1	0	0	#NAME?	55646500	0	0		0	#NAME?
KICH	18p	amp	1	0	1	0	1	0	0.0699735	-3.83705	14291122	0.0699735	0.245758	3.51216	1.75608	0.812359
KICH	18p	del	1	0	1	0	1	0	0	#NAME?	14291122	0	0		1.75608	0.812359
KICH	18q	amp	1	0	1	0	1	0	0	#NAME?	58419494	0	0		1.75608	0.812359
KICH	18q	del	1	0	1	0	1	0	0.0171176	-5.86838	58419494	0.0171176	0	0	1.75608	0.812359
KICH	19p	amp	1	0	1	0	1	0	0.0420717	-4.57101	23768975	0.0420717	0	0	3.65824	1.87115
KICH	19p	del	1	0	1	0	1	0	0	#NAME?	23768975	0	0		3.65824	1.87115
KICH	19q	amp	1	0	1	0	1	0	0	#NAME?	30637733	0	0		3.65824	1.87115
KICH	19q	del	1	0	1	0	1	0	0.0326395	-4.93724	30637733	0.0326395	0.238806	7.31647	3.65824	1.87115
KICH	1p	amp	1	0	1	0	1	0	0.00852451	-6.87417	117308752	0.00852451	0	0	inf	inf
KICH	1p	del	1	0	1	0	1	0	0.00852451	-6.87417	117308752	0.00852451	0.102207	11.9898	inf	inf
KICH	1q	amp	1	0	1	0	1	0	0	#NAME?	97934162	0	0.034069	inf	inf	inf
KICH	1q	del	1	0	1	0	1	0	0.0102109	-6.61374	97934162	0.0102109	0	0	inf	inf
KICH	20p	amp	1	0	1	0	1	0	0	#NAME?	25742136	0	0
KICH	20p	del	1	0	1	0	1	0	0	#NAME?	25742136	0	0
KICH	20q	amp	1	0	1	0	1	0	0	#NAME?	32375865	0	0
KICH	20q	del	1	0	1	0	1	0	0	#NAME?	32375865	0	0
KICH	21	amp	1	0	1	0	1	0	0	#NAME?	32331154	0	1.10766	inf	inf	inf
KICH	21	del	1	0	1	0	1	0	0	#NAME?	32331154	0	2.34564	inf	inf	inf
KICH	22	amp	1	0	1	0	1	0	0	#NAME?	31907083	0	2.64005	inf	inf	inf
KICH	22	del	1	0	1	0	1	0	0.031341	-4.9958	31907083	0.031341	0.229569	7.32489	inf	inf
KICH	2p	amp	1	0	1	0	1	0	0	#NAME?	88646532	0	0		0	#NAME?
KICH	2p	del	1	0	1	0	1	0	0.0112808	-6.46999	88646532	0.0112808	0	0	0	#NAME?
KICH	2q	amp	1	0	1	0	1	0	0	#NAME?	147134363	0	0		0	#NAME?
KICH	2q	del	1	0	1	0	1	0	0.0203895	-5.61603	147134363	0.0203895	0	0	0	#NAME?
KICH	3p	amp	1	0	1	0	1	0	0.0339853	-4.87894	88273392	0.0339853	0	0	inf	inf
KICH	3p	del	1	0	1	0	1	0	0	#NAME?	88273392	0	0.307815	inf	inf	inf
KICH	3q	amp	1	0	1	0	1	0	0.00963354	-6.69772	103804007	0.00963354	0.615629	63.9048	inf	inf
KICH	3q	del	1	0	1	0	1	0	0.00963354	-6.69772	103804007	0.00963354	0	0	inf	inf
KICH	4p	amp	1	0	1	0	1	0	0	#NAME?	47014893	0	0		0	#NAME?
KICH	4p	del	1	0	1	0	1	0	0.0212699	-5.55505	47014893	0.0212699	0	0	0	#NAME?
KICH	4q	amp	1	0	1	0	1	0	0	#NAME?	136064895	0	0		0	#NAME?
KICH	4q	del	1	0	1	0	1	0	0.0146989	-6.08815	136064895	0.0146989	0	0	0	#NAME?
KICH	5p	amp	1	0	1	0	1	0	0.02249	-5.47457	44464224	0.02249	0	0	0	#NAME?
KICH	5p	del	1	0	1	0	1	0	0.02249	-5.47457	44464224	0.02249	0	0	0	#NAME?
KICH	5q	amp	1	0	1	0	1	0	0	#NAME?	130235614	0	0		0	#NAME?
KICH	5q	del	1	0	1	0	1	0	0.00767839	-7.02498	130235614	0.00767839	0	0	0	#NAME?
KICH	6p	amp	1	0	1	0	1	0	0	#NAME?	56192205	0	0		inf	inf
KICH	6p	del	1	0	1	0	1	0	0	#NAME?	56192205	0	0		inf	inf
KICH	6q	amp	1	0	1	0	1	0	0	#NAME?	108669387	0	0		inf	inf
KICH	6q	del	1	0	1	0	1	0	0	#NAME?	108669387	0	0.198884	inf	inf	inf
KICH	7p	amp	1	0	1	0	1	0	0	#NAME?	57230627	0	0		0	#NAME?
KICH	7p	del	1	0	1	0	1	0	0	#NAME?	57230627	0	0		0	#NAME?
KICH	7q	amp	1	0	1	0	1	0	0	#NAME?	95272854	0	0		0	#NAME?
KICH	7q	del	1	0	1	0	1	0	0.0104962	-6.57399	95272854	0.0104962	0	0	0	#NAME?
KICH	8p	amp	1	0	1	0	1	0	0.0236319	-5.40312	42315706	0.0236319	0	0	inf	inf
KICH	8p	del	1	0	1	0	1	0	0	#NAME?	42315706	0	0.220869	inf	inf	inf
KICH	8q	amp	1	0	1	0	1	0	0.0102279	-6.61134	97771552	0.0102279	0.220869	21.5947	inf	inf
KICH	8q	del	1	0	1	0	1	0	0	#NAME?	97771552	0	0		inf	inf
KICH	9p	amp	1	0	1	0	1	0	0.0263451	-5.24632	37957757	0.0263451	0.0619361	2.35095	inf	inf
KICH	9p	del	1	0	1	0	1	0	0	#NAME?	37957757	0	0.030968	inf	inf	inf
KICH	9q	amp	1	0	1	0	1	0	0	#NAME?	69899709	0	0		inf	inf
KICH	9q	del	1	0	1	0	1	0	0.0286124	-5.12721	69899709	0.0286124	0.030968	1.08233	inf	inf
KIPAN	10p	amp	1	0	1	0	1	0	0.12937	-2.95042	38648761	0.12937	1.28734	9.95084	6.25479	2.64496
KIPAN	10p	del	1	0	1	0	1	0	0.284615	-1.81292	38648761	0.284615	0.257469	0.904622	6.25479	2.64496
KIPAN	10q	amp	1	0	1	0	1	0	0.0433477	-4.5279	92277118	0.0433477	0.257469	5.93961	6.25479	2.64496
KIPAN	10q	del	1	0	1	0	1	0	0.28176	-1.82746	92277118	0.28176	2.31722	8.22408	6.25479	2.64496
KIPAN	11p	amp	1	0	1	0	1	0	0.100808	-3.31032	49599211	0.100808	0.335657	3.32966	1.65068	0.723061
KIPAN	11p	del	1	0	1	0	1	0	0.161293	-2.63225	49599211	0.161293	0.335657	2.08104	1.65068	0.723061
KIPAN	11q	amp	1	0	1	0	1	0	0.0639969	-3.96585	78128733	0.0639969	0	0	1.65068	0.723061
KIPAN	11q	del	1	0	1	0	1	0	0.281587	-1.82835	78128733	0.281587	0.335657	1.19202	1.65068	0.723061
KIPAN	12p	amp	1	0	1	0	1	0	0.214519	-2.22083	32631206	0.214519	0.526089	2.45242	1.12789	0.173629
KIPAN	12p	del	1	0	1	0	1	0	0.214519	-2.22083	32631206	0.214519	0	0	1.12789	0.173629
KIPAN	12q	amp	1	0	1	0	1	0	0.0851628	-3.55363	93937781	0.0851628	0.175363	2.05915	1.12789	0.173629
KIPAN	12q	del	1	0	1	0	1	0	0.0638721	-3.96867	93937781	0.0638721	0	0	1.12789	0.173629
KIPAN	13	amp	1	0	1	0	1	0	0.0837375	-3.57798	95536653	0.0837375	2.72482	32.5401	78.6487	6.29735
KIPAN	13	del	1	0	1	0	1	0	0.0523359	-4.25605	95536653	0.0523359	6.52929	124.757	78.6487	6.29735
KIPAN	14	amp	1	0	1	0	1	0	0.0584887	-4.0957	85486671	0.0584887	3.46318	59.2112	45.9254	5.52122
KIPAN	14	del	1	0	1	0	1	0	0.339234	-1.55965	85486671	0.339234	11.0724	32.6395	45.9254	5.52122
KIPAN	15	amp	1	0	1	0	1	0	0.0383648	-4.70407	78196623	0.0383648	3.50393	91.3318	63.5472	5.98976
KIPAN	15	del	1	0	1	0	1	0	0.0767297	-3.70407	78196623	0.0767297	2.74404	35.7625	63.5472	5.98976
KIPAN	16p	amp	1	0	1	0	1	0	0.128218	-2.96333	31196841	0.128218	0.682251	5.32102	2.33571	1.22386
KIPAN	16p	del	1	0	1	0	1	0	0.128218	-2.96333	31196841	0.128218	0	0	2.33571	1.22386
KIPAN	16q	amp	1	0	1	0	1	0	0.0466502	-4.42197	42872272	0.0466502	0	0	2.33571	1.22386
KIPAN	16q	del	1	0	1	0	1	0	0.186601	-2.42197	42872272	0.186601	0.750476	4.02183	2.33571	1.22386
KIPAN	17p	amp	1	0	1	0	1	0	0.0984341	-3.3447	20318172	0.0984341	0	0	inf	inf
KIPAN	17p	del	1	0	1	0	1	0	0.442953	-1.17477	20318172	0.442953	3.78298	8.54037	inf	inf
KIPAN	17q	amp	1	0	1	0	1	0	0.485206	-1.04333	55646500	0.485206	3.27859	6.75711	inf	inf
KIPAN	17q	del	1	0	1	0	1	0	0	#NAME?	55646500	0	0.252199	inf	inf	inf
KIPAN	18p	amp	1	0	1	0	1	0	0.209921	-2.25208	14291122	0.209921	1.22879	5.8536	4.05047	2.01809
KIPAN	18p	del	1	0	1	0	1	0	0.209921	-2.25208	14291122	0.209921	0.491517	2.34144	4.05047	2.01809
KIPAN	18q	amp	1	0	1	0	1	0	0.0684703	-3.86838	58419494	0.0684703	0.245758	3.58927	4.05047	2.01809
KIPAN	18q	del	1	0	1	0	1	0	0.222528	-2.16794	58419494	0.222528	0.983033	4.41756	4.05047	2.01809
KIPAN	19p	amp	1	0	1	0	1	0	0.126215	-2.98605	23768975	0.126215	0.238806	1.89206	2.86711	1.5196
KIPAN	19p	del	1	0	1	0	1	0	0.462788	-1.11158	23768975	0.462788	1.43284	3.09609	2.86711	1.5196
KIPAN	19q	amp	1	0	1	0	1	0	0.163197	-2.61531	30637733	0.163197	0.716418	4.38988	2.86711	1.5196
KIPAN	19q	del	1	0	1	0	1	0	0.228476	-2.12988	30637733	0.228476	0.477612	2.09042	2.86711	1.5196
KIPAN	1p	amp	1	0	1	0	1	0	0.0340981	-4.87417	117308752	0.0340981	0	0	3.92534	1.97282
KIPAN	1p	del	2.62391	1.39172	0.348751	-1.51973	0.91509	-0.128014	0.399341	-1.32431	117308752	0.365433	1.22648	3.35625	3.92534	1.97282
KIPAN	1q	amp	1	0	1	0	1	0	0.102109	-3.29181	97934162	0.102109	1.26055	12.3451	3.92534	1.97282
KIPAN	1q	del	1	0	1	0	1	0	0.163375	-2.61374	97934162	0.163375	0	0	3.92534	1.97282
KIPAN	20p	amp	1	0	1	0	1	0	0.0388468	-4.68606	25742136	0.0388468	0.274268	7.06024	5.89259	2.5589
KIPAN	20p	del	1	0	1	0	1	0	0.155387	-2.68606	25742136	0.155387	1.64561	10.5904	5.89259	2.5589
KIPAN	20q	amp	1	0	1	0	1	0	0.277985	-1.84692	32375865	0.277985	1.64561	5.91977	5.89259	2.5589
KIPAN	20q	del	1	0	1	0	1	0	0.0308872	-5.01685	32375865	0.0308872	0	0	5.89259	2.5589
KIPAN	21	amp	1	0	1	0	1	0	0.15465	-2.69293	32331154	0.15465	5.01706	32.4415	43.6064	5.44647
KIPAN	21	del	1	0	1	0	1	0	0.15465	-2.69293	32331154	0.15465	8.47037	54.7714	43.6064	5.44647
KIPAN	22	amp	1	0	1	0	1	0	0.062682	-3.9958	31907083	0.062682	5.39488	86.0674	57.6835	5.85009
KIPAN	22	del	1	0	1	0	1	0	0.188046	-2.41084	31907083	0.188046	5.50966	29.2996	57.6835	5.85009
KIPAN	2p	amp	1	0	1	0	1	0	0.045123	-4.46999	88646532	0.045123	0.322012	7.13631	7.17451	2.84288
KIPAN	2p	del	1	0	1	0	1	0	0.045123	-4.46999	88646532	0.045123	0.644024	14.2726	7.17451	2.84288
KIPAN	2q	amp	1	0	1	0	1	0	0.0883546	-3.50055	147134363	0.0883546	0.644024	7.28908	7.17451	2.84288
KIPAN	2q	del	1.6509	0.723255	0.0580486	-4.10659	0.0958326	-3.38334	0.490649	-1.02724	147134363	0.0470201	0	0	7.17451	2.84288
KIPAN	3p	amp	1	0	1	0	1	0	0.0679707	-3.87894	88273392	0.0679707	0	0	4.52114	2.17669
KIPAN	3p	del	40.4977	5.33977	1	0	40.4977	5.33977	0.132002	-2.92137	88273392	5.34577	13.5438	2.53356	4.52114	2.17669
KIPAN	3q	amp	4.43225	2.14804	1	0	4.43225	2.14804	0.116113	-3.1064	103804007	0.514641	8.00318	15.551	4.52114	2.17669
KIPAN	3q	del	1	0	1	0	1	0	0.0578012	-4.11276	103804007	0.0578012	0	0	4.52114	2.17669
KIPAN	4p	amp	1	0	1	0	1	0	0.0850794	-3.55505	47014893	0.0850794	0.431972	5.07728	4.35218	2.12174
KIPAN	4p	del	1	0	1	0	1	0	0.127619	-2.97008	47014893	0.127619	1.29592	10.1546	4.35218	2.12174
KIPAN	4q	amp	1	0	1	0	1	0	0.0293977	-5.08815	136064895	0.0293977	0	0	4.35218	2.12174
KIPAN	4q	del	1	0	1	0	1	0	0.198435	-2.33326	136064895	0.198435	0.431972	2.1769	4.35218	2.12174
KIPAN	5p	amp	1	0	1	0	1	0	0.26988	-1.88961	44464224	0.26988	2.31755	8.58733	6.3936	2.67663
KIPAN	5p	del	1	0	1	0	1	0	0.08996	-3.47457	44464224	0.08996	0.210686	2.342	6.3936	2.67663
KIPAN	5q	amp	7.09494	2.82679	0.282209	-1.82517	2.00225	1.00162	0.454689	-1.13705	130235614	0.910402	0.842744	0.925683	6.3936	2.67663
KIPAN	5q	del	1	0	1	0	1	0	0.0460703	-4.44002	130235614	0.0460703	0.632058	13.7194	6.3936	2.67663
KIPAN	6p	amp	1	0	1	0	1	0	0.0889803	-3.49037	56192205	0.0889803	0	0	0.838731	-0.25372
KIPAN	6p	del	1	0	1	0	1	0	0.213553	-2.22734	56192205	0.213553	0.397769	1.86263	0.838731	-0.25372
KIPAN	6q	amp	1	0	1	0	1	0	0	#NAME?	108669387	0	0		0.838731	-0.25372
KIPAN	6q	del	2.39593	1.26059	1	0	2.39593	1.26059	0.381029	-1.39203	108669387	0.912918	0.596653	0.653567	0.838731	-0.25372
KIPAN	7p	amp	1	0	1	0	1	0	0.104839	-3.25375	57230627	0.104839	0	0	0.766892	-0.382905
KIPAN	7p	del	1	0	1	0	1	0	0.0524195	-4.25375	57230627	0.0524195	0	0	0.766892	-0.382905
KIPAN	7q	amp	1	0	1	0	1	0	0.125954	-2.98903	95272854	0.125954	0.386372	3.06757	0.766892	-0.382905
KIPAN	7q	del	1	0	1	0	1	0	0.0524808	-4.25207	95272854	0.0524808	0	0	0.766892	-0.382905
KIPAN	8p	amp	1	0	1	0	1	0	0.0945275	-3.40312	42315706	0.0945275	0	0	6.36994	2.67128
KIPAN	8p	del	2.92956	1.55068	1	0	2.92956	1.55068	0.563254	-0.828142	42315706	1.65008	7.73041	4.68486	6.36994	2.67128
KIPAN	8q	amp	1	0	1	0	1	0	0.276154	-1.85646	97771552	0.276154	5.74259	20.7949	6.36994	2.67128
KIPAN	8q	del	1	0	1	0	1	0	0.0102279	-6.61134	97771552	0.0102279	0	0	6.36994	2.67128
KIPAN	9p	amp	1	0	1	0	1	0	0.15807	-2.66136	37957757	0.15807	0.123872	0.783652	1.13983	0.188825
KIPAN	9p	del	1	0	1	0	1	0	0.316141	-1.66136	37957757	0.316141	0.185808	0.587739	1.13983	0.188825
KIPAN	9q	amp	1	0	1	0	1	0	0.0715311	-3.80529	69899709	0.0715311	0.030968	0.432931	1.13983	0.188825
KIPAN	9q	del	1	0	1	0	1	0	0.157368	-2.66778	69899709	0.157368	0.433553	2.75502	1.13983	0.188825
KIRC	10p	amp	1	0	1	0	1	0	0.0776222	-3.68739	38648761	0.0776222	0.772406	9.95084	7.3474	2.87723
KIRC	10p	del	1	0	1	0	1	0	0.12937	-2.95042	38648761	0.12937	0	0	7.3474	2.87723
KIRC	10q	amp	1	0	1	0	1	0	0.0216738	-5.5279	92277118	0.0216738	0.257469	11.8792	7.3474	2.87723
KIRC	10q	del	1	0	1	0	1	0	0.238412	-2.06847	92277118	0.238412	1.80228	7.55951	7.3474	2.87723
KIRC	11p	amp	1	0	1	0	1	0	0.0806464	-3.63225	49599211	0.0806464	0.167828	2.08104	0.52026	-0.942696
KIRC	11p	del	1	0	1	0	1	0	0.0403232	-4.63225	49599211	0.0403232	0	0	0.52026	-0.942696
KIRC	11q	amp	1	0	1	0	1	0	0.0511976	-4.28778	78128733	0.0511976	0	0	0.52026	-0.942696
KIRC	11q	del	1	0	1	0	1	0	0.115194	-3.11786	78128733	0.115194	0	0	0.52026	-0.942696
KIRC	12p	amp	1	0	1	0	1	0	0.0919365	-3.44322	32631206	0.0919365	0.350726	3.81487	0.953718	-0.068366
KIRC	12p	del	1	0	1	0	1	0	0.0306455	-5.02818	32631206	0.0306455	0	0	0.953718	-0.068366
KIRC	12q	amp	1	0	1	0	1	0	0.0425814	-4.55363	93937781	0.0425814	0	0	0.953718	-0.068366
KIRC	12q	del	1	0	1	0	1	0	0.0425814	-4.55363	93937781	0.0425814	0	0	0.953718	-0.068366
KIRC	13	amp	1	0	1	0	1	0	0.0628031	-3.99302	95536653	0.0628031	1.02824	16.3724	43.1821	5.43236
KIRC	13	del	1	0	1	0	1	0	0.0418687	-4.57798	95536653	0.0418687	2.93047	69.9918	43.1821	5.43236
KIRC	14	amp	1	0	1	0	1	0	0.0350932	-4.83267	85486671	0.0350932	0.682881	19.4591	27.3023	4.77095
KIRC	14	del	1	0	1	0	1	0	0.245652	-2.02531	85486671	0.245652	8.63357	35.1455	27.3023	4.77095
KIRC	15	amp	1	0	1	0	1	0	0.0383648	-4.70407	78196623	0.0383648	1.13983	29.7104	24.4285	4.61049
KIRC	15	del	1	0	1	0	1	0	0.0639414	-3.96711	78196623	0.0639414	1.22426	19.1467	24.4285	4.61049
KIRC	16p	amp	1	0	1	0	1	0	0.0961636	-3.37837	31196841	0.0961636	0.409351	4.25681	2.52669	1.33725
KIRC	16p	del	1	0	1	0	1	0	0.0320545	-4.96333	31196841	0.0320545	0	0	2.52669	1.33725
KIRC	16q	amp	1	0	1	0	1	0	0.0233251	-5.42197	42872272	0.0233251	0	0	2.52669	1.33725
KIRC	16q	del	1	0	1	0	1	0	0.0699753	-3.83701	42872272	0.0699753	0.409351	5.84993	2.52669	1.33725
KIRC	17p	amp	1	0	1	0	1	0	0.0984341	-3.3447	20318172	0.0984341	0	0	inf	inf
KIRC	17p	del	1	0	1	0	1	0	0.246085	-2.02277	20318172	0.246085	2.01759	8.19875	inf	inf
KIRC	17q	amp	1	0	1	0	1	0	0.233618	-2.09778	55646500	0.233618	1.51319	6.47722	inf	inf
KIRC	17q	del	1	0	1	0	1	0	0	#NAME?	55646500	0	0.252199	inf	inf	inf
KIRC	18p	amp	1	0	1	0	1	0	0.0699735	-3.83705	14291122	0.0699735	0.245758	3.51216	5.70394	2.51196
KIRC	18p	del	1	0	1	0	1	0	0.139947	-2.83705	14291122	0.139947	0.245758	1.75608	5.70394	2.51196
KIRC	18q	amp	1	0	1	0	1	0	0.0171176	-5.86838	58419494	0.0171176	0.245758	14.3571	5.70394	2.51196
KIRC	18q	del	1	0	1	0	1	0	0.154058	-2.69845	58419494	0.154058	0.491517	3.19046	5.70394	2.51196
KIRC	19p	amp	1	0	1	0	1	0	0.0420717	-4.57101	23768975	0.0420717	0	0	2.18272	1.12613
KIRC	19p	del	1	0	1	0	1	0	0.294502	-1.76365	23768975	0.294502	0.955224	3.24353	2.18272	1.12613
KIRC	19q	amp	1	0	1	0	1	0	0.130558	-2.93724	30637733	0.130558	0.716418	5.48735	2.18272	1.12613
KIRC	19q	del	1	0	1	0	1	0	0.065279	-3.93724	30637733	0.065279	0	0	2.18272	1.12613
KIRC	1p	amp	1	0	1	0	1	0	0.017049	-5.87417	117308752	0.017049	0	0	3.24029	1.69612
KIRC	1p	del	1	0	1	0	1	0	0.323932	-1.62624	117308752	0.323932	0.647311	1.9983	3.24029	1.69612
KIRC	1q	amp	1	0	1	0	1	0	0.0714766	-3.80639	97934162	0.0714766	0.783587	10.9629	3.24029	1.69612
KIRC	1q	del	1	0	1	0	1	0	0.132742	-2.9133	97934162	0.132742	0	0	3.24029	1.69612
KIRC	20p	amp	1	0	1	0	1	0	0	#NAME?	25742136	0	0.274268	inf	inf	inf
KIRC	20p	del	1	0	1	0	1	0	0.11654	-3.1011	25742136	0.11654	1.64561	14.1205	inf	inf
KIRC	20q	amp	1	0	1	0	1	0	0.154436	-2.69492	32375865	0.154436	1.64561	10.6556	inf	inf
KIRC	20q	del	1	0	1	0	1	0	0.0308872	-5.01685	32375865	0.0308872	0	0	inf	inf
KIRC	21	amp	1	0	1	0	1	0	0.12372	-3.01485	32331154	0.12372	2.80174	22.6459	60.8278	5.92666
KIRC	21	del	1	0	1	0	1	0	0.0309299	-5.01485	32331154	0.0309299	3.06236	99.0098	60.8278	5.92666
KIRC	22	amp	1	0	1	0	1	0	0.031341	-4.9958	31907083	0.031341	2.52526	80.5738	69.5864	6.12073
KIRC	22	del	1	0	1	0	1	0	0.031341	-4.9958	31907083	0.031341	1.83655	58.5991	69.5864	6.12073
KIRC	2p	amp	1	0	1	0	1	0	0.0225615	-5.46999	88646532	0.0225615	0.322012	14.2726	4.1604	2.05672
KIRC	2p	del	1	0	1	0	1	0	0.0112808	-6.46999	88646532	0.0112808	0	0	4.1604	2.05672
KIRC	2q	amp	1	0	1	0	1	0	0.0679651	-3.87906	147134363	0.0679651	0.161006	2.36895	4.1604	2.05672
KIRC	2q	del	1.78843	0.838697	0.0344473	-4.85947	0.0616067	-4.02077	0.381616	-1.38981	147134363	0.0235101	0	0	4.1604	2.05672
KIRC	3p	amp	1	0	1	0	1	0	0.0339853	-4.87894	88273392	0.0339853	0	0	2.78354	1.47692
KIRC	3p	del	39.1258	5.29005	1	0	39.1258	5.29005	0.131979	-2.92162	88273392	5.16379	12.9282	2.50363	2.78354	1.47692
KIRC	3q	amp	8.45861	3.08042	1	0	8.45861	3.08042	0.0463816	-4.4303	103804007	0.392323	3.38596	8.63054	2.78354	1.47692
KIRC	3q	del	1	0	1	0	1	0	0.0289006	-5.11276	103804007	0.0289006	0	0	2.78354	1.47692
KIRC	4p	amp	1	0	1	0	1	0	0.0425397	-4.55505	47014893	0.0425397	0.215986	5.07728	4.15782	2.05583
KIRC	4p	del	1	0	1	0	1	0	0.106349	-3.23312	47014893	0.106349	1.07993	10.1546	4.15782	2.05583
KIRC	4q	amp	1	0	1	0	1	0	0.0220483	-5.50319	136064895	0.0220483	0	0	4.15782	2.05583
KIRC	4q	del	1	0	1	0	1	0	0.154338	-2.69583	136064895	0.154338	0.215986	1.39943	4.15782	2.05583
KIRC	5p	amp	1	0	1	0	1	0	0.06747	-3.88961	44464224	0.06747	1.89617	28.104	10.7322	3.42388
KIRC	5p	del	1	0	1	0	1	0	0.02249	-5.47457	44464224	0.02249	0	0	10.7322	3.42388
KIRC	5q	amp	13.5909	3.76457	0.24658	-2.01987	3.35125	1.7447	0.227474	-2.13623	130235614	0.762321	0.842744	1.1055	10.7322	3.42388
KIRC	5q	del	1	0	1	0	1	0	0.0153568	-6.02498	130235614	0.0153568	0.210686	13.7194	10.7322	3.42388
KIRC	6p	amp	1	0	1	0	1	0	0.0711843	-3.8123	56192205	0.0711843	0	0	0.918636	-0.122435
KIRC	6p	del	1	0	1	0	1	0	0.0889803	-3.49037	56192205	0.0889803	0.198884	2.23515	0.918636	-0.122435
KIRC	6q	amp	1	0	1	0	1	0	0	#NAME?	108669387	0	0		0.918636	-0.122435
KIRC	6q	del	2.70627	1.43631	1	0	2.70627	1.43631	0.282244	-1.82499	108669387	0.763829	0.397769	0.520757	0.918636	-0.122435
KIRC	7p	amp	1	0	1	0	1	0	0.0698926	-3.83872	57230627	0.0698926	0	0	0.460135	-1.11987
KIRC	7p	del	1	0	1	0	1	0	0.0174732	-5.83872	57230627	0.0174732	0	0	0.460135	-1.11987
KIRC	7q	amp	1	0	1	0	1	0	0.104962	-3.25207	95272854	0.104962	0.193186	1.84054	0.460135	-1.11987
KIRC	7q	del	1	0	1	0	1	0	0.0314885	-4.98903	95272854	0.0314885	0	0	0.460135	-1.11987
KIRC	8p	amp	1	0	1	0	1	0	0.0472638	-4.40312	42315706	0.0472638	0	0	9.88163	3.30475
KIRC	8p	del	1.98173	0.986758	1	0	1.98173	0.986758	0.74132	-0.431832	42315706	1.46909	7.06781	4.811	9.88163	3.30475
KIRC	8q	amp	1	0	1	0	1	0	0.204558	-2.28941	97771552	0.204558	5.07999	24.8339	9.88163	3.30475
KIRC	8q	del	1	0	1	0	1	0	0	#NAME?	97771552	0	0		9.88163	3.30475
KIRC	9p	amp	1	0	1	0	1	0	0.131725	-2.92439	37957757	0.131725	0	0	1.10502	0.144079
KIRC	9p	del	1	0	1	0	1	0	0.131725	-2.92439	37957757	0.131725	0.030968	0.235095	1.10502	0.144079
KIRC	9q	amp	1	0	1	0	1	0	0.0429186	-4.54225	69899709	0.0429186	0.030968	0.721552	1.10502	0.144079
KIRC	9q	del	1	0	1	0	1	0	0.0715311	-3.80529	69899709	0.0715311	0.247744	3.46345	1.10502	0.144079
KIRP	10p	amp	1	0	1	0	1	0	0.0258741	-5.27235	38648761	0.0258741	0.514937	19.9017	6.95529	2.79811
KIRP	10p	del	1	0	1	0	1	0	0.155244	-2.68739	38648761	0.155244	0	0	6.95529	2.79811
KIRP	10q	amp	1	0	1	0	1	0	0.0216738	-5.5279	92277118	0.0216738	0	0	6.95529	2.79811
KIRP	10q	del	1	0	1	0	1	0	0.0325108	-4.94294	92277118	0.0325108	0.257469	7.91949	6.95529	2.79811
KIRP	11p	amp	1	0	1	0	1	0	0.0201616	-5.63225	49599211	0.0201616	0.167828	8.32416	4.75809	2.25038
KIRP	11p	del	1	0	1	0	1	0	0.0403232	-4.63225	49599211	0.0403232	0.335657	8.32416	4.75809	2.25038
KIRP	11q	amp	1	0	1	0	1	0	0.0127994	-6.28778	78128733	0.0127994	0	0	4.75809	2.25038
KIRP	11q	del	1	0	1	0	1	0	0.140793	-2.82835	78128733	0.140793	0.335657	2.38404	4.75809	2.25038
KIRP	12p	amp	1	0	1	0	1	0	0.061291	-4.02818	32631206	0.061291	0.175363	2.86115	2.08806	1.06216
KIRP	12p	del	1	0	1	0	1	0	0.122582	-3.02818	32631206	0.122582	0	0	2.08806	1.06216
KIRP	12q	amp	1	0	1	0	1	0	0.031936	-4.96867	93937781	0.031936	0.175363	5.49107	2.08806	1.06216
KIRP	12q	del	1	0	1	0	1	0	0.0212907	-5.55363	93937781	0.0212907	0	0	2.08806	1.06216
KIRP	13	amp	1	0	1	0	1	0	0.0209344	-5.57798	95536653	0.0209344	1.33671	63.8522	90.8666	6.50568
KIRP	13	del	1	0	1	0	1	0	0.0104672	-6.57798	95536653	0.0104672	1.23388	117.881	90.8666	6.50568
KIRP	14	amp	1	0	1	0	1	0	0.0116977	-6.41763	85486671	0.0116977	0.292663	25.0188	26.8059	4.74448
KIRP	14	del	1	0	1	0	1	0	0.0818841	-3.61027	85486671	0.0818841	2.34131	28.5929	26.8059	4.74448
KIRP	15	amp	1	0	1	0	1	0	0	#NAME?	78196623	0	0.253296	inf	inf	inf
KIRP	15	del	1	0	1	0	1	0	0.0127883	-6.28903	78196623	0.0127883	1.39313	108.938	inf	inf
KIRP	16p	amp	1	0	1	0	1	0	0.0320545	-4.96333	31196841	0.0320545	0.204675	6.38522	2.03505	1.02506
KIRP	16p	del	1	0	1	0	1	0	0.0961636	-3.37837	31196841	0.0961636	0	0	2.03505	1.02506
KIRP	16q	amp	1	0	1	0	1	0	0.0233251	-5.42197	42872272	0.0233251	0	0	2.03505	1.02506
KIRP	16q	del	1	0	1	0	1	0	0.116625	-3.10004	42872272	0.116625	0.204675	1.75498	2.03505	1.02506
KIRP	17p	amp	1	0	1	0	1	0	0	#NAME?	20318172	0	0		8.57694	3.10046
KIRP	17p	del	1	0	1	0	1	0	0.196868	-2.3447	20318172	0.196868	1.76539	8.96739	8.57694	3.10046
KIRP	17q	amp	1	0	1	0	1	0	0.215647	-2.21326	55646500	0.215647	1.76539	8.18649	8.57694	3.10046
KIRP	17q	del	1	0	1	0	1	0	0	#NAME?	55646500	0	0		8.57694	3.10046
KIRP	18p	amp	1	0	1	0	1	0	0.0699735	-3.83705	14291122	0.0699735	0.737275	10.5365	5.90501	2.56194
KIRP	18p	del	1	0	1	0	1	0	0.0699735	-3.83705	14291122	0.0699735	0.245758	3.51216	5.90501	2.56194
KIRP	18q	amp	1	0	1	0	1	0	0.0513527	-4.28342	58419494	0.0513527	0	0	5.90501	2.56194
KIRP	18q	del	1	0	1	0	1	0	0.0513527	-4.28342	58419494	0.0513527	0.491517	9.57138	5.90501	2.56194
KIRP	19p	amp	1	0	1	0	1	0	0.0420717	-4.57101	23768975	0.0420717	0.238806	5.67617	2.58584	1.37064
KIRP	19p	del	1	0	1	0	1	0	0.168287	-2.57101	23768975	0.168287	0.477612	2.83809	2.58584	1.37064
KIRP	19q	amp	1	0	1	0	1	0	0.0326395	-4.93724	30637733	0.0326395	0	0	2.58584	1.37064
KIRP	19q	del	1	0	1	0	1	0	0.130558	-2.93724	30637733	0.130558	0.238806	1.82912	2.58584	1.37064
KIRP	1p	amp	1	0	1	0	1	0	0.00852451	-6.87417	117308752	0.00852451	0	0	5.03331	2.33151
KIRP	1p	del	1	0	0.283792	-1.81709	0.283792	-1.81709	0.296158	-1.75556	117308752	0.0840474	0.476966	5.67497	5.03331	2.33151
KIRP	1q	amp	1	0	1	0	1	0	0.0306328	-5.02878	97934162	0.0306328	0.442897	14.4583	5.03331	2.33151
KIRP	1q	del	1	0	1	0	1	0	0.0204219	-5.61374	97934162	0.0204219	0	0	5.03331	2.33151
KIRP	20p	amp	1	0	1	0	1	0	0.0388468	-4.68606	25742136	0.0388468	0	0	0	#NAME?
KIRP	20p	del	1	0	1	0	1	0	0.0388468	-4.68606	25742136	0.0388468	0	0	0	#NAME?
KIRP	20q	amp	1	0	1	0	1	0	0.123549	-3.01685	32375865	0.123549	0	0	0	#NAME?
KIRP	20q	del	1	0	1	0	1	0	0	#NAME?	32375865	0	0		0	#NAME?
KIRP	21	amp	1	0	1	0	1	0	0.0309299	-5.01485	32331154	0.0309299	1.10766	35.812	30.2822	4.9204
KIRP	21	del	1	0	1	0	1	0	0.12372	-3.01485	32331154	0.12372	3.06236	24.7524	30.2822	4.9204
KIRP	22	amp	1	0	1	0	1	0	0.031341	-4.9958	31907083	0.031341	0.229569	7.32489	17.3966	4.12073
KIRP	22	del	1	0	1	0	1	0	0.125364	-2.9958	31907083	0.125364	3.44354	27.4683	17.3966	4.12073
KIRP	2p	amp	1	0	1	0	1	0	0.0225615	-5.46999	88646532	0.0225615	0	0	13.0587	3.70694
KIRP	2p	del	1	0	1	0	1	0	0.0225615	-5.46999	88646532	0.0225615	0.644024	28.5453	13.0587	3.70694
KIRP	2q	amp	1	0	1	0	1	0	0.0203895	-5.61603	147134363	0.0203895	0.483018	23.6895	13.0587	3.70694
KIRP	2q	del	1	0	1	0	1	0	0.0543721	-4.20099	147134363	0.0543721	0	0	13.0587	3.70694
KIRP	3p	amp	1	0	1	0	1	0	0	#NAME?	88273392	0	0		18.4397	4.20474
KIRP	3p	del	1	0	1	0	1	0	0.0906275	-3.46391	88273392	0.0906275	0.307815	3.39648	18.4397	4.20474
KIRP	3q	amp	1	0	1	0	1	0	0.0770683	-3.69772	103804007	0.0770683	4.00159	51.9226	18.4397	4.20474
KIRP	3q	del	1	0	1	0	1	0	0.0192671	-5.69772	103804007	0.0192671	0	0	18.4397	4.20474
KIRP	4p	amp	1	0	1	0	1	0	0.0425397	-4.55505	47014893	0.0425397	0.215986	5.07728	inf	inf
KIRP	4p	del	1	0	1	0	1	0	0	#NAME?	47014893	0	0.215986	inf	inf	inf
KIRP	4q	amp	1	0	1	0	1	0	0.00734943	-7.08815	136064895	0.00734943	0	0	inf	inf
KIRP	4q	del	1	0	1	0	1	0	0.0293977	-5.08815	136064895	0.0293977	0.215986	7.34703	inf	inf
KIRP	5p	amp	1	0	1	0	1	0	0.17992	-2.47457	44464224	0.17992	0.421372	2.342	6.32964	2.66212
KIRP	5p	del	1	0	1	0	1	0	0.04498	-4.47457	44464224	0.04498	0.210686	4.684	6.32964	2.66212
KIRP	5q	amp	1	0	1	0	1	0	0.0767839	-3.70305	130235614	0.0767839	0	0	6.32964	2.66212
KIRP	5q	del	1	0	1	0	1	0	0.0230352	-5.44002	130235614	0.0230352	0.421372	18.2926	6.32964	2.66212
KIRP	6p	amp	1	0	1	0	1	0	0.0177961	-5.8123	56192205	0.0177961	0	0	0.532179	-0.910017
KIRP	6p	del	1	0	1	0	1	0	0.124572	-3.00494	56192205	0.124572	0.198884	1.59654	0.532179	-0.910017
KIRP	6q	amp	1	0	1	0	1	0	0	#NAME?	108669387	0	0		0.532179	-0.910017
KIRP	6q	del	1	0	1	0	1	0	0.110427	-3.17884	108669387	0.110427	0	0	0.532179	-0.910017
KIRP	7p	amp	1	0	1	0	1	0	0.0349463	-4.83872	57230627	0.0349463	0	0	2.30067	1.20206
KIRP	7p	del	1	0	1	0	1	0	0.0349463	-4.83872	57230627	0.0349463	0	0	2.30067	1.20206
KIRP	7q	amp	1	0	1	0	1	0	0.0209923	-5.57399	95272854	0.0209923	0.193186	9.2027	2.30067	1.20206
KIRP	7q	del	1	0	1	0	1	0	0.0104962	-6.57399	95272854	0.0104962	0	0	2.30067	1.20206
KIRP	8p	amp	1	0	1	0	1	0	0.0236319	-5.40312	42315706	0.0236319	0	0	3.35726	1.74729
KIRP	8p	del	1	0	1	0	1	0	0.0708957	-3.81816	42315706	0.0708957	0.441738	6.23082	3.35726	1.74729
KIRP	8q	amp	1	0	1	0	1	0	0.0613675	-4.02638	97771552	0.0613675	0.441738	7.19823	3.35726	1.74729
KIRP	8q	del	1	0	1	0	1	0	0.0102279	-6.61134	97771552	0.0102279	0	0	3.35726	1.74729
KIRP	9p	amp	1	0	1	0	1	0	0	#NAME?	37957757	0	0.0619361	inf	inf	inf
KIRP	9p	del	1	0	1	0	1	0	0.184416	-2.43897	37957757	0.184416	0.123872	0.671701	inf	inf
KIRP	9q	amp	1	0	1	0	1	0	0.0286124	-5.12721	69899709	0.0286124	0	0	inf	inf
KIRP	9q	del	1	0	1	0	1	0	0.0572248	-4.12721	69899709	0.0572248	0.15484	2.70582	inf	inf
LAML	10p	amp	1	0	1	0	1	0	0.0258741	-5.27235	38648761	0.0258741	0	0	0	#NAME?
LAML	10p	del	1	0	1	0	1	0	0.0517481	-4.27235	38648761	0.0517481	0	0	0	#NAME?
LAML	10q	amp	1	0	1	0	1	0	0.0216738	-5.5279	92277118	0.0216738	0	0	0	#NAME?
LAML	10q	del	1	0	1	0	1	0	0.0108369	-6.5279	92277118	0.0108369	0	0	0	#NAME?
LAML	11p	amp	1	0	1	0	1	0	0	#NAME?	49599211	0	0		inf	inf
LAML	11p	del	1	0	1	0	1	0	0	#NAME?	49599211	0	0.167828	inf	inf	inf
LAML	11q	amp	1	0	1	0	1	0	0.0639969	-3.96585	78128733	0.0639969	0.167828	2.62244	inf	inf
LAML	11q	del	1	0	1	0	1	0	0	#NAME?	78128733	0	0		inf	inf
LAML	12p	amp	1	0	1	0	1	0	0	#NAME?	32631206	0	0		1.43058	0.516596
LAML	12p	del	1	0	1	0	1	0	0.061291	-4.02818	32631206	0.061291	0.175363	2.86115	1.43058	0.516596
LAML	12q	amp	1	0	1	0	1	0	0	#NAME?	93937781	0	0		1.43058	0.516596
LAML	12q	del	1	0	1	0	1	0	0.0106453	-6.55363	93937781	0.0106453	0	0	1.43058	0.516596
LAML	13	amp	1	0	1	0	1	0	0.0209344	-5.57798	95536653	0.0209344	0.154235	7.36756	3.68378	1.88119
LAML	13	del	1	0	1	0	1	0	0.0314016	-4.99302	95536653	0.0314016	0	0	3.68378	1.88119
LAML	14	amp	1	0	1	0	1	0	0	#NAME?	85486671	0	0.0975545	inf	inf	inf
LAML	14	del	1	0	1	0	1	0	0	#NAME?	85486671	0	0		inf	inf
LAML	15	amp	1	0	1	0	1	0	0	#NAME?	78196623	0	0		3.30115	1.72297
LAML	15	del	1	0	1	0	1	0	0.0127883	-6.28903	78196623	0.0127883	0.042216	3.30115	3.30115	1.72297
LAML	16p	amp	1	0	1	0	1	0	0	#NAME?	31196841	0	0		0.974988	-0.0365434
LAML	16p	del	1	0	1	0	1	0	0	#NAME?	31196841	0	0		0.974988	-0.0365434
LAML	16q	amp	1	0	1	0	1	0	0	#NAME?	42872272	0	0		0.974988	-0.0365434
LAML	16q	del	1	0	1	0	1	0	0.0699753	-3.83701	42872272	0.0699753	0.0682251	0.974988	0.974988	-0.0365434
LAML	17p	amp	1	0	1	0	1	0	0	#NAME?	20318172	0	0		9.78301	3.29028
LAML	17p	del	1	0	1	0	1	0	0.393736	-1.3447	20318172	0.393736	0.504398	1.28106	9.78301	3.29028
LAML	17q	amp	1	0	1	0	1	0	0.0179706	-5.79822	55646500	0.0179706	0.504398	28.068	9.78301	3.29028
LAML	17q	del	1	0	1	0	1	0	0.0718823	-3.79822	55646500	0.0718823	0	0	9.78301	3.29028
LAML	18p	amp	1	0	1	0	1	0	0	#NAME?	14291122	0	0		0.58536	-0.772603
LAML	18p	del	1	0	1	0	1	0	0.209921	-2.25208	14291122	0.209921	0.245758	1.17072	0.58536	-0.772603
LAML	18q	amp	1	0	1	0	1	0	0	#NAME?	58419494	0	0		0.58536	-0.772603
LAML	18q	del	1	0	1	0	1	0	0.0513527	-4.28342	58419494	0.0513527	0	0	0.58536	-0.772603
LAML	19p	amp	1	0	1	0	1	0	0.0841433	-3.57101	23768975	0.0841433	0	0	0	#NAME?
LAML	19p	del	1	0	1	0	1	0	0.126215	-2.98605	23768975	0.126215	0	0	0	#NAME?
LAML	19q	amp	1	0	1	0	1	0	0.065279	-3.93724	30637733	0.065279	0	0	0	#NAME?
LAML	19q	del	1	0	1	0	1	0	0.065279	-3.93724	30637733	0.065279	0	0	0	#NAME?
LAML	1p	amp	1	0	1	0	1	0	0.0255735	-5.2892	117308752	0.0255735	0	0	0	#NAME?
LAML	1p	del	1	0	1	0	1	0	0	#NAME?	117308752	0	0		0	#NAME?
LAML	1q	amp	1	0	1	0	1	0	0.0204219	-5.61374	97934162	0.0204219	0	0	0	#NAME?
LAML	1q	del	1	0	1	0	1	0	0	#NAME?	97934162	0	0		0	#NAME?
LAML	20p	amp	1	0	1	0	1	0	0	#NAME?	25742136	0	0.274268	inf	inf	inf
LAML	20p	del	1	0	1	0	1	0	0	#NAME?	25742136	0	0		inf	inf
LAML	20q	amp	1	0	1	0	1	0	0.0617744	-4.01685	32375865	0.0617744	0	0	inf	inf
LAML	20q	del	1	0	1	0	1	0	0	#NAME?	32375865	0	0		inf	inf
LAML	21	amp	1	0	1	0	1	0	0.0927898	-3.42989	32331154	0.0927898	0.58641	6.31977	4.21318	2.07491
LAML	21	del	1	0	1	0	1	0	0.0309299	-5.01485	32331154	0.0309299	0.0651567	2.10659	4.21318	2.07491
LAML	22	amp	1	0	1	0	1	0	0.031341	-4.9958	31907083	0.031341	0.401746	12.8186	6.40928	2.68016
LAML	22	del	1	0	1	0	1	0	0.031341	-4.9958	31907083	0.031341	0	0	6.40928	2.68016
LAML	2p	amp	1	0	1	0	1	0	0	#NAME?	88646532	0	0.161006	inf	inf	inf
LAML	2p	del	1	0	1	0	1	0	0	#NAME?	88646532	0	0		inf	inf
LAML	2q	amp	1	0	1	0	1	0	0	#NAME?	147134363	0	0		inf	inf
LAML	2q	del	1	0	1	0	1	0	0	#NAME?	147134363	0	0		inf	inf
LAML	3p	amp	1	0	1	0	1	0	0	#NAME?	88273392	0	0
LAML	3p	del	1	0	1	0	1	0	0	#NAME?	88273392	0	0
LAML	3q	amp	1	0	1	0	1	0	0	#NAME?	103804007	0	0
LAML	3q	del	1	0	1	0	1	0	0	#NAME?	103804007	0	0
LAML	4p	amp	1	0	1	0	1	0	0	#NAME?	47014893	0	0		inf	inf
LAML	4p	del	1	0	1	0	1	0	0	#NAME?	47014893	0	0		inf	inf
LAML	4q	amp	1	0	1	0	1	0	0	#NAME?	136064895	0	0.215986	inf	inf	inf
LAML	4q	del	1	0	1	0	1	0	0	#NAME?	136064895	0	0		inf	inf
LAML	5p	amp	1	0	1	0	1	0	0	#NAME?	44464224	0	0.210686	inf	inf	inf
LAML	5p	del	1	0	1	0	1	0	0	#NAME?	44464224	0	0		inf	inf
LAML	5q	amp	1	0	1	0	1	0	0	#NAME?	130235614	0	0		inf	inf
LAML	5q	del	1	0	1	0	1	0	0.0307136	-5.02498	130235614	0.0307136	0.210686	6.85971	inf	inf
LAML	6p	amp	1	0	1	0	1	0	0	#NAME?	56192205	0	0		0	#NAME?
LAML	6p	del	1	0	1	0	1	0	0	#NAME?	56192205	0	0		0	#NAME?
LAML	6q	amp	1	0	1	0	1	0	0.0184044	-5.7638	108669387	0.0184044	0	0	0	#NAME?
LAML	6q	del	1	0	1	0	1	0	0.0184044	-5.7638	108669387	0.0184044	0	0	0	#NAME?
LAML	7p	amp	1	0	1	0	1	0	0	#NAME?	57230627	0	0		0	#NAME?
LAML	7p	del	1	0	1	0	1	0	0.0349463	-4.83872	57230627	0.0349463	0	0	0	#NAME?
LAML	7q	amp	1	0	1	0	1	0	0	#NAME?	95272854	0	0		0	#NAME?
LAML	7q	del	1	0	1	0	1	0	0.104962	-3.25207	95272854	0.104962	0	0	0	#NAME?
LAML	8p	amp	1	0	1	0	1	0	0	#NAME?	42315706	0	0.220869	inf	inf	inf
LAML	8p	del	1	0	1	0	1	0	0.0236319	-5.40312	42315706	0.0236319	0	0	inf	inf
LAML	8q	amp	1	0	1	0	1	0	0.0204558	-5.61134	97771552	0.0204558	0.220869	10.7973	inf	inf
LAML	8q	del	1	0	1	0	1	0	0	#NAME?	97771552	0	0		inf	inf
LAML	9p	amp	1	0	1	0	1	0	0	#NAME?	37957757	0	0.030968	inf	inf	inf
LAML	9p	del	1	0	1	0	1	0	0	#NAME?	37957757	0	0		inf	inf
LAML	9q	amp	1	0	1	0	1	0	0.0429186	-4.54225	69899709	0.0429186	0	0	inf	inf
LAML	9q	del	1	0	1	0	1	0	0.0143062	-6.12721	69899709	0.0143062	0	0	inf	inf
LGG	10p	amp	6.33914	2.66429	1	0	6.33914	2.66429	0.484078	-1.04669	38648761	3.06864	3.86203	1.25855	2.19251	1.13258
LGG	10p	del	1	0	1	0	1	0	0.206992	-2.27235	38648761	0.206992	0.257469	1.24386	2.19251	1.13258
LGG	10q	amp	1	0	1	0	1	0	0.0216738	-5.5279	92277118	0.0216738	0	0	2.19251	1.13258
LGG	10q	del	1	0	0.222399	-2.16878	0.222399	-2.16878	0.923544	-0.114748	92277118	0.205396	1.28734	6.26763	2.19251	1.13258
LGG	11p	amp	1	0	1	0	1	0	0.141131	-2.82489	49599211	0.141131	0	0	1.38268	0.467463
LGG	11p	del	1	0	1	0	1	0	1.27018	0.345035	49599211	1.27018	2.68525	2.11407	1.38268	0.467463
LGG	11q	amp	1	0	1	0	1	0	0.511976	-0.965853	78128733	0.511976	0.839142	1.63903	1.38268	0.467463
LGG	11q	del	1	0	0.0794622	-3.65359	0.0794622	-3.65359	1.18815	0.248712	78128733	0.0944126	0.167828	1.77761	1.38268	0.467463
LGG	12p	amp	1	0	1	0	1	0	1.07259	0.101103	32631206	1.07259	1.05218	0.980967	0.655581	-0.609154
LGG	12p	del	1	0	0.0859611	-3.54017	0.0859611	-3.54017	1.50838	0.593002	32631206	0.129662	0	0	0.655581	-0.609154
LGG	12q	amp	1	0	1	0	1	0	0.170326	-2.55363	93937781	0.170326	0	0	0.655581	-0.609154
LGG	12q	del	47.056	5.55631	0.0734537	-3.76702	3.45644	1.78929	0.123642	-3.01576	93937781	0.427361	0.701452	1.64136	0.655581	-0.609154
LGG	13	amp	1	0	1	0	1	0	0.115139	-3.11855	95536653	0.115139	0.0514118	0.446519	8.00013	3.00002
LGG	13	del	1	0	1	0	1	0	0.188409	-2.40806	95536653	0.188409	2.93047	15.5537	8.00013	3.00002
LGG	14	amp	1	0	1	0	1	0	0.0584887	-4.0957	85486671	0.0584887	0.195109	3.33584	4.50161	2.17044
LGG	14	del	9.17022	3.19696	0.238056	-2.07062	2.18303	1.12633	0.181357	-2.4631	85486671	0.395907	2.24375	5.66737	4.50161	2.17044
LGG	15	amp	1	0	1	0	1	0	0.166248	-2.58859	78196623	0.166248	0.21108	1.26967	7.03082	2.81369
LGG	15	del	1	0	1	0	1	0	0.102306	-3.28903	78196623	0.102306	1.3087	12.792	7.03082	2.81369
LGG	16p	amp	1	0	1	0	1	0	0.160273	-2.6414	31196841	0.160273	0.13645	0.851363	1.52907	0.612659
LGG	16p	del	1	0	1	0	1	0	0.0641091	-3.96333	31196841	0.0641091	0	0	1.52907	0.612659
LGG	16q	amp	1	0	1	0	1	0	0.0699753	-3.83701	42872272	0.0699753	0.341125	4.87494	1.52907	0.612659
LGG	16q	del	1	0	1	0	1	0	0.349876	-1.51508	42872272	0.349876	0.13645	0.389995	1.52907	0.612659
LGG	17p	amp	1	0	1	0	1	0	0.147651	-2.75974	20318172	0.147651	0.252199	1.70807	0.569358	-0.812592
LGG	17p	del	1	0	1	0	1	0	0.0984341	-3.3447	20318172	0.0984341	0	0	0.569358	-0.812592
LGG	17q	amp	1	0	1	0	1	0	0.413323	-1.27466	55646500	0.413323	0	0	0.569358	-0.812592
LGG	17q	del	1	0	0	#NAME?	0	#NAME?	0.705874	-0.502518	55646500	0	0		0.569358	-0.812592
LGG	18p	amp	1	0	1	0	1	0	0.349868	-1.51512	14291122	0.349868	0.245758	0.702432	0.580857	-0.783744
LGG	18p	del	1	0	1	0	1	0	0.909656	-0.136608	14291122	0.909656	1.47455	1.621	0.580857	-0.783744
LGG	18q	amp	1	0	1	0	1	0	0.0684703	-3.86838	58419494	0.0684703	0	0	0.580857	-0.783744
LGG	18q	del	1	0	1	0	1	0	0.325234	-1.62045	58419494	0.325234	0	0	0.580857	-0.783744
LGG	19p	amp	1	0	1	0	1	0	0.631075	-0.664117	23768975	0.631075	4.0597	6.43299	5.98223	2.58068
LGG	19p	del	1	0	1	0	1	0	0.25243	-1.98605	23768975	0.25243	0	0	5.98223	2.58068
LGG	19q	amp	1	0	1	0	1	0	0.130558	-2.93724	30637733	0.130558	0	0	5.98223	2.58068
LGG	19q	del	1	0	1	0	1	0	2.25212	1.17129	30637733	2.25212	39.403	17.4959	5.98223	2.58068
LGG	1p	amp	1	0	1	0	1	0	0.00852451	-6.87417	117308752	0.00852451	0	0	23.4787	4.55328
LGG	1p	del	1	0	0.173914	-2.52356	0.173914	-2.52356	0.380562	-1.3938	117308752	0.0661849	5.55325	83.9051	23.4787	4.55328
LGG	1q	amp	1	0	1	0	1	0	0.0408438	-4.61374	97934162	0.0408438	0.408828	10.0096	23.4787	4.55328
LGG	1q	del	1	0	0.188977	-2.40372	0.188977	-2.40372	0.444991	-1.16815	97934162	0.084093	0	0	23.4787	4.55328
LGG	20p	amp	1	0	1	0	1	0	0.194234	-2.36413	25742136	0.194234	0.822803	4.23614	2.37047	1.24517
LGG	20p	del	1	0	1	0	1	0	0.271928	-1.8787	25742136	0.271928	0.822803	3.02582	2.37047	1.24517
LGG	20q	amp	1	0	1	0	1	0	0.247098	-2.01685	32375865	0.247098	0.548535	2.21991	2.37047	1.24517
LGG	20q	del	1	0	0.0150262	-6.05637	0.0150262	-6.05637	2.15259	1.10607	32375865	0.0323453	0	0	2.37047	1.24517
LGG	21	amp	1	0	1	0	1	0	0.0927898	-3.42989	32331154	0.0927898	1.23798	13.3417	9.83076	3.2973
LGG	21	del	1	0	1	0	1	0	0.216509	-2.2075	32331154	0.216509	1.36829	6.31977	9.83076	3.2973
LGG	22	amp	1	0	1	0	1	0	0.125364	-2.9958	31907083	0.125364	0.860885	6.86708	4.56045	2.18918
LGG	22	del	1	0	1	0	1	0	0.814866	-0.295365	31907083	0.814866	1.83655	2.25381	4.56045	2.18918
LGG	2p	amp	1	0	1	0	1	0	0.101527	-3.30007	88646532	0.101527	0.322012	3.1717	0.792924	-0.334746
LGG	2p	del	1	0	1	0	1	0	0.169211	-2.5631	88646532	0.169211	0	0	0.792924	-0.334746
LGG	2q	amp	1	0	1	0	1	0	0.0203895	-5.61603	147134363	0.0203895	0	0	0.792924	-0.334746
LGG	2q	del	1.7728	0.826029	0.0385587	-4.6968	0.0683569	-3.87077	1.30018	0.378715	147134363	0.0888765	0	0	0.792924	-0.334746
LGG	3p	amp	1	0	1	0	1	0	0.21524	-2.21598	88273392	0.21524	0	0	4.67587	2.22523
LGG	3p	del	1	0	1	0	1	0	0.135941	-2.87894	88273392	0.135941	0.923444	6.79296	4.67587	2.22523
LGG	3q	amp	1	0	1	0	1	0	0.0481677	-4.37579	103804007	0.0481677	0.307815	6.39048	4.67587	2.22523
LGG	3q	del	1	0	0.112395	-3.15335	0.112395	-3.15335	0.992273	-0.0111908	103804007	0.111526	0.615629	5.52004	4.67587	2.22523
LGG	4p	amp	1	0	1	0	1	0	0.0638096	-3.97008	47014893	0.0638096	0.215986	3.38485	5.02316	2.3286
LGG	4p	del	1	0	1	0	1	0	0.170159	-2.55505	47014893	0.170159	1.07993	6.3466	5.02316	2.3286
LGG	4q	amp	1	0	1	0	1	0	0.0220483	-5.50319	136064895	0.0220483	0.215986	9.79604	5.02316	2.3286
LGG	4q	del	1	0	1	0	1	0	0.382171	-1.38771	136064895	0.382171	0.215986	0.565156	5.02316	2.3286
LGG	5p	amp	1	0	1	0	1	0	0.11245	-3.15265	44464224	0.11245	0.632058	5.62079	2.90533	1.5387
LGG	5p	del	1	0	1	0	1	0	0.53976	-0.889611	44464224	0.53976	1.26412	2.342	2.90533	1.5387
LGG	5q	amp	1	0	1	0	1	0	0.0460703	-4.44002	130235614	0.0460703	0	0	2.90533	1.5387
LGG	5q	del	1	0	1	0	1	0	0.230352	-2.11809	130235614	0.230352	0.842744	3.65851	2.90533	1.5387
LGG	6p	amp	1	0	1	0	1	0	0.142369	-2.8123	56192205	0.142369	0.198884	1.39697	0.713512	-0.486991
LGG	6p	del	1	0	0.150349	-2.73361	0.150349	-2.73361	0.690794	-0.533673	56192205	0.10386	0	0	0.713512	-0.486991
LGG	6q	amp	1	0	1	0	1	0	0.0368089	-4.7638	108669387	0.0368089	0	0	0.713512	-0.486991
LGG	6q	del	5.36908	2.42468	0.389806	-1.35917	2.0929	1.06551	0.326091	-1.61665	108669387	0.682477	0.994422	1.45708	0.713512	-0.486991
LGG	7p	amp	1	0	1	0	1	0	0.122312	-3.03136	57230627	0.122312	0	0	0.181446	-2.46239
LGG	7p	del	1	0	0.132251	-2.91865	0.132251	-2.91865	0.668273	-0.58149	57230627	0.0883801	0	0	0.181446	-2.46239
LGG	7q	amp	4.53671	2.18165	1	0	4.53671	2.18165	0.234686	-2.09119	95272854	1.0647	0.772745	0.725784	0.181446	-2.46239
LGG	7q	del	1	0	1	0	1	0	0.0734732	-3.76664	95272854	0.0734732	0	0	0.181446	-2.46239
LGG	8p	amp	1	0	1	0	1	0	0.141791	-2.81816	42315706	0.141791	0.220869	1.5577	0.867821	-0.204531
LGG	8p	del	1	0	1	0	1	0	0.259951	-1.94369	42315706	0.259951	0.220869	0.849657	0.867821	-0.204531
LGG	8q	amp	6.39904	2.67786	1	0	6.39904	2.67786	0.0973265	-3.36102	97771552	0.622796	0.662607	1.06392	0.867821	-0.204531
LGG	8q	del	1	0	0.0377472	-4.72749	0.0377472	-4.72749	0.954346	-0.0674164	97771552	0.0360238	0	0	0.867821	-0.204531
LGG	9p	amp	1	0	1	0	1	0	0.131725	-2.92439	37957757	0.131725	0	0	0.45829	-1.12567
LGG	9p	del	5.18786	2.37514	0.843121	-0.246189	4.37399	2.12895	0.720266	-0.473399	37957757	3.15044	0.774201	0.245744	0.45829	-1.12567
LGG	9q	amp	1	0	1	0	1	0	0.214593	-2.22032	69899709	0.214593	0.340648	1.58742	0.45829	-1.12567
LGG	9q	del	1	0	1	0	1	0	0.0572248	-4.12721	69899709	0.0572248	0	0	0.45829	-1.12567
LIHC	10p	amp	1	0	1	0	1	0	0.310489	-1.68739	38648761	0.310489	3.08962	9.95084	5.46234	2.44952
LIHC	10p	del	1	0	1	0	1	0	0.310489	-1.68739	38648761	0.310489	0.257469	0.829237	5.46234	2.44952
LIHC	10q	amp	1	0	1	0	1	0	0.0866954	-3.5279	92277118	0.0866954	0.257469	2.96981	5.46234	2.44952
LIHC	10q	del	1	0	1	0	1	0	0.476825	-1.06847	92277118	0.476825	3.86203	8.09947	5.46234	2.44952
LIHC	11p	amp	1	0	1	0	1	0	0.302424	-1.72535	49599211	0.302424	0.839142	2.77472	1.67081	0.74055
LIHC	11p	del	1	0	1	0	1	0	0.262101	-1.93181	49599211	0.262101	0.167828	0.64032	1.67081	0.74055
LIHC	11q	amp	1	0	1	0	1	0	0.115194	-3.11786	78128733	0.115194	0.335657	2.91383	1.67081	0.74055
LIHC	11q	del	1	0	1	0	1	0	0.473577	-1.07833	78128733	0.473577	0.167828	0.354384	1.67081	0.74055
LIHC	12p	amp	1	0	1	0	1	0	0.367746	-1.44322	32631206	0.367746	0	0	1.83746	0.877715
LIHC	12p	del	1	0	1	0	1	0	0.704847	-0.504618	32631206	0.704847	2.98117	4.22953	1.83746	0.877715
LIHC	12q	amp	1	0	1	0	1	0	0.15968	-2.64674	93937781	0.15968	0.350726	2.19643	1.83746	0.877715
LIHC	12q	del	1	0	0.366385	-1.44857	0.366385	-1.44857	0.518056	-0.948819	93937781	0.189808	0.175363	0.923895	1.83746	0.877715
LIHC	13	amp	3.15352	1.65696	0.153414	-2.70449	0.483795	-1.04753	0.302714	-1.72397	95536653	0.146452	0.514118	3.51049	13.09	3.71039
LIHC	13	del	1	0	1	0	1	0	0.136073	-2.87754	95536653	0.136073	3.08471	22.6694	13.09	3.71039
LIHC	14	amp	1	0	1	0	1	0	0.0350932	-4.83267	85486671	0.0350932	0.780436	22.239	12.7942	3.67742
LIHC	14	del	1	0	1	0	1	0	0.713562	-0.48689	85486671	0.713562	2.39008	3.34951	12.7942	3.67742
LIHC	15	amp	1	0	1	0	1	0	0.306919	-1.70407	78196623	0.306919	0.802105	2.61341	5.0205	2.32783
LIHC	15	del	1	0	1	0	1	0	0.255766	-1.96711	78196623	0.255766	1.89972	7.42759	5.0205	2.32783
LIHC	16p	amp	1	0	1	0	1	0	0.288491	-1.7934	31196841	0.288491	0.545801	1.89192	1.88171	0.912042
LIHC	16p	del	1	0	1	0	1	0	0.576981	-0.793403	31196841	0.576981	0.341125	0.591224	1.88171	0.912042
LIHC	16q	amp	1	0	1	0	1	0	0.0933004	-3.42197	42872272	0.0933004	0.204675	2.19372	1.88171	0.912042
LIHC	16q	del	1	0	1	0	1	0	0.909679	-0.136571	42872272	0.909679	2.59255	2.84997	1.88171	0.912042
LIHC	17p	amp	1	0	1	0	1	0	0.295302	-1.75974	20318172	0.295302	0	0	3.12174	1.64235
LIHC	17p	del	4.74595	2.2467	1	0	4.74595	2.2467	1.66551	0.735961	20318172	7.90441	19.1671	2.42486	3.12174	1.64235
LIHC	17q	amp	1	0	1	0	1	0	0.952441	-0.0702986	55646500	0.952441	9.58356	10.0621	3.12174	1.64235
LIHC	17q	del	1	0	1	0	1	0	0.0718823	-3.79822	55646500	0.0718823	0	0	3.12174	1.64235
LIHC	18p	amp	1	0	1	0	1	0	0.629762	-0.667122	14291122	0.629762	1.47455	2.34144	1.77508	0.827881
LIHC	18p	del	1	0	1	0	1	0	0.559788	-0.837047	14291122	0.559788	1.22879	2.1951	1.77508	0.827881
LIHC	18q	amp	1	0	1	0	1	0	0.239646	-2.06102	58419494	0.239646	0	0	1.77508	0.827881
LIHC	18q	del	1	0	1	0	1	0	0.479292	-1.06102	58419494	0.479292	1.22879	2.56376	1.77508	0.827881
LIHC	19p	amp	1	0	1	0	1	0	0.378645	-1.40108	23768975	0.378645	0	0	1.48502	0.570482
LIHC	19p	del	1	0	1	0	1	0	1.59872	0.67692	23768975	1.59872	2.62687	1.6431	1.48502	0.570482
LIHC	19q	amp	1	0	1	0	1	0	0.685429	-0.54492	30637733	0.685429	2.38806	3.48403	1.48502	0.570482
LIHC	19q	del	1	0	1	0	1	0	0.293755	-1.76731	30637733	0.293755	0.238806	0.812941	1.48502	0.570482
LIHC	1p	amp	1	0	1	0	1	0	0.0852451	-3.55224	117308752	0.0852451	0	0	7.75953	2.95597
LIHC	1p	del	1	0	0.305466	-1.71092	0.305466	-1.71092	1.4004	0.485838	117308752	0.427774	1.4309	3.34499	7.75953	2.95597
LIHC	1q	amp	1	0	1	0	1	0	0.204219	-2.29181	97934162	0.204219	5.65546	27.6931	7.75953	2.95597
LIHC	1q	del	1	0	1	0	1	0	0.0510547	-4.29181	97934162	0.0510547	0	0	7.75953	2.95597
LIHC	20p	amp	1	0	1	0	1	0	0.349621	-1.51613	25742136	0.349621	0.822803	2.35341	1.17362	0.230971
LIHC	20p	del	1	0	1	0	1	0	0.699243	-0.516135	25742136	0.699243	1.09707	1.56894	1.17362	0.230971
LIHC	20q	amp	1	0	1	0	1	0	0.710406	-0.493285	32375865	0.710406	0.548535	0.772144	1.17362	0.230971
LIHC	20q	del	1	0	1	0	1	0	0.0308872	-5.01685	32375865	0.0308872	0	0	1.17362	0.230971
LIHC	21	amp	1	0	1	0	1	0	0.278369	-1.84493	32331154	0.278369	0.97735	3.51098	6.56115	2.71395
LIHC	21	del	1	0	1	0	1	0	0.494879	-1.01485	32331154	0.494879	4.75644	9.61132	6.56115	2.71395
LIHC	22	amp	1	0	1	0	1	0	0.595479	-0.747877	31907083	0.595479	1.43481	2.4095	3.26488	1.70703
LIHC	22	del	1	0	1	0	1	0	0.62682	-0.673877	31907083	0.62682	2.58266	4.12025	3.26488	1.70703
LIHC	2p	amp	1	0	1	0	1	0	0.270738	-1.88503	88646532	0.270738	0.483018	1.78408	2.15388	1.10694
LIHC	2p	del	1	0	1	0	1	0	0.0564038	-4.14806	88646532	0.0564038	0	0	2.15388	1.10694
LIHC	2q	amp	1	0	1	0	1	0	0.0883546	-3.50055	147134363	0.0883546	0	0	2.15388	1.10694
LIHC	2q	del	1	0	0.0932778	-3.42232	0.0932778	-3.42232	0.505338	-0.984679	147134363	0.0471369	0.322012	6.83143	2.15388	1.10694
LIHC	3p	amp	1	0	1	0	1	0	0.192584	-2.37644	88273392	0.192584	0.307815	1.59834	6.21185	2.63502
LIHC	3p	del	1	0	1	0	1	0	0.169927	-2.55702	88273392	0.169927	2.1547	12.6802	6.21185	2.63502
LIHC	3q	amp	1	0	1	0	1	0	0.250472	-1.99728	103804007	0.250472	1.84689	7.37363	6.21185	2.63502
LIHC	3q	del	1	0	1	0	1	0	0.0963354	-3.37579	103804007	0.0963354	0.307815	3.19524	6.21185	2.63502
LIHC	4p	amp	1	0	1	0	1	0	0.233968	-2.09561	47014893	0.233968	2.15986	9.23142	4.20754	2.07298
LIHC	4p	del	1	0	1	0	1	0	0.404127	-1.30712	47014893	0.404127	0.431972	1.0689	4.20754	2.07298
LIHC	4q	amp	1	0	1	0	1	0	0.0808438	-3.62872	136064895	0.0808438	0.215986	2.67165	4.20754	2.07298
LIHC	4q	del	4.21721	2.07629	1	0	4.21721	2.07629	0.225666	-2.14774	136064895	0.951682	3.67176	3.85818	4.20754	2.07298
LIHC	5p	amp	1	0	1	0	1	0	0.96707	-0.0483083	44464224	0.96707	3.79235	3.92148	2.38145	1.25184
LIHC	5p	del	1	0	1	0	1	0	0.04498	-4.47457	44464224	0.04498	0	0	2.38145	1.25184
LIHC	5q	amp	1	0	1	0	1	0	0.276422	-1.85506	130235614	0.276422	0.210686	0.76219	2.38145	1.25184
LIHC	5q	del	1	0	1	0	1	0	0.130533	-2.93752	130235614	0.130533	0.632058	4.84215	2.38145	1.25184
LIHC	6p	amp	1	0	1	0	1	0	0.800823	-0.320445	56192205	0.800823	3.97769	4.967	1.70744	0.771837
LIHC	6p	del	1	0	1	0	1	0	0.106776	-3.22734	56192205	0.106776	0	0	1.70744	0.771837
LIHC	6q	amp	1	0	1	0	1	0	0.0736178	-3.7638	108669387	0.0736178	0	0	1.70744	0.771837
LIHC	6q	del	2.97203	1.57145	1	0	2.97203	1.57145	0.682561	-0.550969	108669387	2.0286	3.7788	1.86277	1.70744	0.771837
LIHC	7p	amp	1	0	1	0	1	0	0.349463	-1.51679	57230627	0.349463	0	0	1.25491	0.327588
LIHC	7p	del	1	0	1	0	1	0	0.122312	-3.03136	57230627	0.122312	0	0	1.25491	0.327588
LIHC	7q	amp	1	0	1	0	1	0	0.230916	-2.11456	95272854	0.230916	1.15912	5.01965	1.25491	0.327588
LIHC	7q	del	1	0	1	0	1	0	0.230916	-2.11456	95272854	0.230916	0	0	1.25491	0.327588
LIHC	8p	amp	1	0	1	0	1	0	0.236319	-2.08119	42315706	0.236319	0	0	3.82385	1.93502
LIHC	8p	del	13.1699	3.71918	1	0	13.1699	3.71918	0.37356	-1.42059	42315706	4.91976	21.2034	4.30985	3.82385	1.93502
LIHC	8q	amp	7.09401	2.8266	1	0	7.09401	2.8266	0.206892	-2.27305	97771552	1.4677	16.1234	10.9855	3.82385	1.93502
LIHC	8q	del	1	0	1	0	1	0	0.0715955	-3.80399	97771552	0.0715955	0	0	3.82385	1.93502
LIHC	9p	amp	1	0	1	0	1	0	0.316141	-1.66136	37957757	0.316141	0.123872	0.391826	0.849511	-0.235295
LIHC	9p	del	2.88154	1.52684	0.314539	-1.66869	0.906357	-0.141849	0.514307	-0.959298	37957757	0.466146	0.495489	1.06295	0.849511	-0.235295
LIHC	9q	amp	1	0	1	0	1	0	0.157368	-2.66778	69899709	0.157368	0.0929041	0.590361	0.849511	-0.235295
LIHC	9q	del	1	0	1	0	1	0	0.228899	-2.12721	69899709	0.228899	0.30968	1.35291	0.849511	-0.235295
LUAD	10p	amp	1	0	1	0	1	0	0.698599	-0.517463	38648761	0.698599	4.1195	5.8968	4.82464	2.27042
LUAD	10p	del	1	0	1	0	1	0	1.11258	0.153914	38648761	1.11258	1.80228	1.6199	4.82464	2.27042
LUAD	10q	amp	1	0	1	0	1	0	0.216738	-2.20597	92277118	0.216738	1.28734	5.93961	4.82464	2.27042
LUAD	10q	del	1	0	1	0	1	0	0.661052	-0.597164	92277118	0.661052	3.86203	5.84224	4.82464	2.27042
LUAD	11p	amp	1	0	1	0	1	0	0.262101	-1.93181	49599211	0.262101	0.167828	0.64032	2.20245	1.13911
LUAD	11p	del	1	0	1	0	1	0	1.27018	0.345035	49599211	1.27018	2.3496	1.84981	2.20245	1.13911
LUAD	11q	amp	1	0	1	0	1	0	0.447979	-1.1585	78128733	0.447979	2.3496	5.24489	2.20245	1.13911
LUAD	11q	del	1	0	1	0	1	0	0.780763	-0.357044	78128733	0.780763	0.839142	1.07477	2.20245	1.13911
LUAD	12p	amp	1	0	1	0	1	0	0.980656	-0.0281804	32631206	0.980656	3.15653	3.2188	2.96123	1.56619
LUAD	12p	del	1	0	1	0	1	0	1.50163	0.586529	32631206	1.50163	2.63044	1.75173	2.96123	1.56619
LUAD	12q	amp	1	0	1	0	1	0	0.330006	-1.59944	93937781	0.330006	1.57827	4.78254	2.96123	1.56619
LUAD	12q	del	1	0	1	0	1	0	0.670657	-0.576354	93937781	0.670657	1.4029	2.09184	2.96123	1.56619
LUAD	13	amp	1	0	1	0	1	0	0.40822	-1.29258	95536653	0.40822	1.13106	2.77071	24.9829	4.64287
LUAD	13	del	1	0	1	0	1	0	0.240745	-2.05442	95536653	0.240745	11.362	47.1951	24.9829	4.64287
LUAD	14	amp	4.40433	2.13892	1	0	4.40433	2.13892	0.156821	-2.67281	85486671	0.69069	4.19484	6.07341	10.2975	3.36423
LUAD	14	del	1.74972	0.807126	0.187158	-2.41767	0.327475	-1.61054	0.748765	-0.417416	85486671	0.245202	3.56074	14.5217	10.2975	3.36423
LUAD	15	amp	1	0	1	0	1	0	0.44759	-1.15975	78196623	0.44759	0.970969	2.16933	15.5093	3.95506
LUAD	15	del	1	0	1	0	1	0	0.29413	-1.76547	78196623	0.29413	8.48542	28.8492	15.5093	3.95506
LUAD	16p	amp	1	0	1	0	1	0	0.833418	-0.262888	31196841	0.833418	2.1832	2.61958	1.43643	0.522486
LUAD	16p	del	1	0	1	0	1	0	1.37834	0.462937	31196841	1.37834	0.750476	0.544476	1.43643	0.522486
LUAD	16q	amp	1	0	1	0	1	0	0.349876	-1.51508	42872272	0.349876	0.341125	0.974988	1.43643	0.522486
LUAD	16q	del	1	0	1	0	1	0	1.65608	0.727774	42872272	1.65608	2.66078	1.60667	1.43643	0.522486
LUAD	17p	amp	1	0	1	0	1	0	0.393736	-1.3447	20318172	0.393736	0.756597	1.92158	3.21864	1.68645
LUAD	17p	del	3.05333	1.61038	1	0	3.05333	1.61038	2.75405	1.46156	20318172	8.40902	20.1759	2.39932	3.21864	1.68645
LUAD	17q	amp	3.50784	1.81058	1	0	3.50784	1.81058	0.591438	-0.757701	55646500	2.07467	13.6187	6.5643	3.21864	1.68645
LUAD	17q	del	1	0	0.0953433	-3.39072	0.0953433	-3.39072	1.32965	0.411048	55646500	0.126773	0.252199	1.98937	3.21864	1.68645
LUAD	18p	amp	1	0	1	0	1	0	2.3791	1.25042	14291122	2.3791	3.19486	1.34289	1.86855	0.901918
LUAD	18p	del	1	0	1	0	1	0	1.0496	0.0698433	14291122	1.0496	2.70334	2.57559	1.86855	0.901918
LUAD	18q	amp	1	0	1	0	1	0	0.290999	-1.78092	58419494	0.290999	0.737275	2.5336	1.86855	0.901918
LUAD	18q	del	2.70106	1.43353	1	0	2.70106	1.43353	0.890167	-0.167852	58419494	2.4044	2.45758	1.02212	1.86855	0.901918
LUAD	19p	amp	1	0	1	0	1	0	0.589003	-0.763653	23768975	0.589003	0	0	3.16884	1.66395
LUAD	19p	del	2.81573	1.49351	1	0	2.81573	1.49351	1.9098	0.933424	23768975	5.3775	14.806	2.75332	3.16884	1.66395
LUAD	19q	amp	1	0	1	0	1	0	0.65279	-0.61531	30637733	0.65279	5.25373	8.04812	3.16884	1.66395
LUAD	19q	del	3.09559	1.63021	0.225924	-2.14609	0.699367	-0.515878	1.45774	0.543735	30637733	1.0195	1.91045	1.87391	3.16884	1.66395
LUAD	1p	amp	1	0	1	0	1	0	0.443275	-1.17373	117308752	0.443275	0.170345	0.384288	4.91596	2.29747
LUAD	1p	del	1	0	1	0	1	0	0.460324	-1.11928	117308752	0.460324	1.73752	3.77456	4.91596	2.29747
LUAD	1q	amp	1	0	1	0	1	0	0.347172	-1.52628	97934162	0.347172	5.3829	15.505	4.91596	2.29747
LUAD	1q	del	1	0	1	0	1	0	0.142953	-2.80639	97934162	0.142953	0	0	4.91596	2.29747
LUAD	20p	amp	1	0	1	0	1	0	0.505009	-0.98562	25742136	0.505009	3.01694	5.97405	3.6896	1.88346
LUAD	20p	del	1	0	1	0	1	0	1.98119	0.986365	25742136	1.98119	9.05083	4.56839	3.6896	1.88346
LUAD	20q	amp	1	0	1	0	1	0	2.1621	1.11244	32375865	2.1621	6.85669	3.1713	3.6896	1.88346
LUAD	20q	del	1	0	1	0	1	0	0.525082	-0.929384	32375865	0.525082	0.548535	1.04467	3.6896	1.88346
LUAD	21	amp	1	0	1	0	1	0	0.711388	-0.491291	32331154	0.711388	4.75644	6.68614	8.77159	3.13284
LUAD	21	del	1	0	1	0	1	0	0.804178	-0.314413	32331154	0.804178	8.731	10.857	8.77159	3.13284
LUAD	22	amp	1	0	1	0	1	0	0.407433	-1.29537	31907083	0.407433	2.2383	5.49367	4.9245	2.29998
LUAD	22	del	1	0	1	0	1	0	2.31923	1.21365	31907083	2.31923	10.1011	4.35534	4.9245	2.29998
LUAD	2p	amp	1	0	1	0	1	0	0.327142	-1.61201	88646532	0.327142	0.483018	1.47648	2.48689	1.31434
[truncated: 1,435 more rows]

## Sheet: Table S5d
Table S5d
List of chromosomes, centromeric mechanism scores, and associated information.
chromosome	centromere_length	centromeric_mechanism_score	log_centromeric_mechanism_score	total_aSCNAs	aSCNA_rate	centromeric_breakpoints
1	29352184	1.87201	0.904591	5051	0.464588	2003
2	6210947	3.29561	1.72054	2829	0.26021	386
3	3248709	9.88404	3.3051	4999	0.459805	1255
4	4629931	4.46331	2.15812	4649	0.427612	642
5	4746400	7.344	2.87657	5524	0.508094	1678
6	5028048	2.75716	1.46318	4013	0.369113	410
7	5176355	2.01382	1.00993	6921	0.636589	186
8	4527573	4.75122	2.2483	6337	0.582873	1503
9	32291356	1.69574	0.761919	6052	0.556659	1530
10	3883970	2.99372	1.58194	5319	0.489238	545
11	5958468	4.78787	2.25938	3866	0.355592	541
12	5702459	3.7678	1.91372	4438	0.408205	964
13	19450805	11.0043	3.45999	3004	0.276306	4280
14	20501367	9.27488	3.21333	2456	0.225901	3543
15	23687684	11.0814	3.47007	2216	0.203826	3381
16	14657366	1.98325	0.987868	5480	0.504047	1465
17	3965125	5.17696	2.3721	5189	0.477281	1226
18	4069040	2.22834	1.15597	5971	0.549209	873
19	4187502	4.20209	2.07111	3918	0.360375	1251
20	3646074	3.02711	1.59794	6941	0.638429	800
21	15347620	8.41249	3.07253	2753	0.253219	3541
22	17423929	7.65739	2.93685	3051	0.280629	3880

## Sheet: Table S5e
Table S5e
Spearman's rho and p-values for correlation between net selection scores and cohort-specific aSCNA rates (see Table S2f). Fisher's method p-value is reported at the bottom.
	rho	p
LUSC	0.665552	2.97777e-11
BRCA	0.610755	2.89018e-09
OV	0.565514	6.86365e-08
PRAD	0.445118	4.43969e-05
HNSC	0.432263	7.74866e-05
LUAD	0.405491	0.000230573
LGG	0.374817	0.00072222
KIRC	0.324984	0.00369508
STAD	0.318911	0.00443026
ESCA	0.315505	0.00489711
SARC	0.315396	0.00491267
BLCA	0.297003	0.0082765
UCEC	0.296288	0.0084405
CESC	0.295682	0.00858179
GBM	0.284704	0.0115251
LIHC	0.262365	0.0203113
COAD	0.262056	0.0204648
READ	0.24996	0.0273067
SKCM	0.208017	0.0676178
PCPG	0.195152	0.0868565
UVM	0.181206	0.112353
PAAD	0.177897	0.119178
CHOL	0.0965247	0.400524
UCS	0.00760286	0.947327
MESO	-0.0430892	0.70797
TGCT	-0.0435556	0.704954
KIRP	-0.0987633	0.389636
ACC	-0.174703	0.126062
DLBC	NA	NA
KICH	NA	NA
LAML	NA	NA
THCA	NA	NA
THYM	NA	NA
Fisher's method p-value		3.48525e-39
